# Supplementary material for: Fast energy minimization of the CCDC drug-subset structures by molecule-in-cluster computations allows independent structure validation and model completion
Source: Royal Society of Chemistry journal article supplement (doi:10.1039/d0ce00488j), 2020-01-01

## Supplementary information for the manuscript

### “Fast energy minimization of the CCDC drug-subset structures by molecule-in-cluster computations allows independent structure validation and model completion”

by

Birger Dittrich,<sup>†a</sup> Stephen Chan<sup>b</sup>, Seth Wiggin<sup>c</sup>, Joanna S. Stevens<sup>c</sup> and Elna Pidcock<sup>c</sup>

Content:

- a. List of 53 Drug Subset<sup>1</sup> structures with atoms or molecules on special positions not considered in our GFN2-xTB<sup>2</sup> computations
- b. List of disordered structures where two separate conformers were optimized
- c. List of structures where optimization failed or was not performed due to missing atoms combined with structural complexity.
- d. List of 708 optimized structures. When `_m` is added to the refcode it means that the molecule were either not within the unit cell, or needed moving to bring cation and anion close together.
- e. List of 690 RMSD values for most of the optimized structures that serve as an additional cross validation and confirm that the optimized structure agrees with the experimental one. These were computed between the optimized and the original refcode coordinates, using the non-hydrogen atom coordinates only. The flagged entries were checked and corrected afterwards. This illustrates the power of combining quantum chemical optimization with experiment.
- f. Computer-generated list of 732 plots of ASU-in-cluster geometry optimizations, displaying energy versus individual optimization cycle, re-generating the cluster four times each time

References

1. M. J. Bryant, S. N. Black, H. Blade, R. Docherty, A. G. P. Maloney and S. C. Taylor, *J Pharm Sci*, 2019, **108**, 1655-1662.
2. C. Bannwarth, S. Ehlert and S. Grimme, *J Chem Theory Comput*, 2019, **15**, 1652-1671.
3. O. Kennard, D. G. Watson, N. W. Isaacs, D. W. Wampler, J. C. Coppola, D. H. Chenery, A. J. Kirby, A. C. Larson, S. Warren, K. A. Kerr, W. D. S. Motherwell and L. R. di Sanseverino, *Nature*, 1970, **225**, 333-336.
4. V. T. Hoffmann and H. Musso, *Angew Chem Int Ed Engl*, 1987, **26**, 1006-1007.
5. A. Bom, M. Bradley, K. Cameron, J. K. Clark, J. v. Egmond, H. Feilden, E. J. MacLean, A. W. Muir, R. Palin, D. C. Rees and M.-Q. Zhang, *Angew Chem Int Ed Engl*, 2002, **41**, 265-270.
6. C. Brandel, Y. Cartigny, N. Couvrat, M. E. S. Eusébio, J. Canotilho, S. Petit and G. Coquerel, *Chemistry of Materials*, 2015, **27**, 6360-6373.
7. L. Feng, P. H. Karpinski, P. Sutton, Y. Liu, D. F. Hook, B. Hu, T. J. Blacklock, P. E. Fanwick, M. Prashad, S. Godtfredsen and C. Ziltener, *Tetrahedron Letters*, 2012, **53**, 275-276.
8. J. M. Adam, D. J. Bennett, A. Bom, J. K. Clark, H. Feilden, E. J. Hutchinson, R. Palin, A. Prosser, D. C. Rees, G. M. Rosair, D. Stevenson, G. J. Tarver and M.-Q. Zhang, *J. Med. Chem.*, 2002, **45**, 1806-1816.
9. P. J. Loll, A. E. Bevivino, B. D. Korty and P. H. Axelsen, *J. Am. Chem. Soc.*, 1997, **119**, 426-430.
10. A. Kokkinou, F. Tsorteki, M. Karpusas, A. Papakyriakou, K. Bethanis and D. Mentzafos, *J. Carbohyd. Res.*, 2010, **345**, 1034-1040.
11. E. Pohl, A. Heine, G. M. Sheldrick, Z. Dauter, K. S. Wilson, J. Kallen, W. Huber and P. J. Pfäffli, *Acta Cryst. D*, 1995, **51**, 48-59.



Table 1: List of 53 Drug Subset<sup>1</sup> structures with atoms or molecules on special positions not considered in our GFN2-xTB<sup>2</sup> computations

1. ACXMAC\_water\_on\_special\_position
2. AMALAC\_1\_molecule\_on\_special\_position
3. ASATOD\_mol\_on\_special\_position
4. AWUWIY01\_water\_on\_special\_position
5. BETXON\_water\_on\_special\_position
6. BINZIH\_cl\_on\_special\_position
7. BOKHAM02\_biphenyl\_on\_special\_position
8. BRPRBZ\_molecule\_on\_special\_position
9. CAASCO02\_Ca\_on\_special\_position
10. CATDAE\_mol\_on\_special\_position
11. CIGCIG\_molecule\_on\_special\_position
12. CYCLIZ10\_molecule\_on\_special\_position
13. CYPHEP\_water\_on\_special\_position
14. EPUDIE\_dioxane\_on\_special\_position
15. GIHWOJ\_mol\_on\_special\_position
16. GUCSEC\_solvent\_on\_special\_position
17. HIHF EK\_water\_on\_special\_position
18. JINGIW01\_chloride\_on\_special\_position
19. JOHFUJ\_mol\_on\_special\_position
20. JUBFER\_molecule\_on\_special\_position
21. JUKWAN\_molecule\_on\_special\_position
22. KADKIJ\_on\_special\_position
23. KANXIG\_h\_molecule\_on\_special\_position
24. KHD BEZ\_h\_K\_on\_special\_position
25. L CYSTI14\_molecule\_on\_special\_position
26. LIKVEI\_acn\_on\_special\_position
27. LOYCUZ\_solvent\_on\_special\_position
28. MAAZNB\_h-molecule\_on\_special\_position
29. MAVGAS\_counterion\_on\_special\_position
30. NEQVEL\_mol\_on\_special\_position
31. NOJKON\_cofomer\_on\_special\_position
32. OGEREY\_sulphate\_on\_special\_position
33. OGUTOB\_cofomer\_on\_special\_position
34. OJUQAN\_cofomer\_on\_special\_position
35. ORACUH\_solvent\_on\_special\_position
36. QIGCEO05\_molecule\_on\_special\_position
37. QUOLSO\_on\_special\_position
38. RIGTOS01\_molecule\_on\_special\_position
39. SALHIW\_chloride\_on\_special\_position
40. SIMJUU\_mol\_on\_special\_position
41. SIXZOO02\_molecule\_on\_special\_position
42. TIWXOM01\_molecule\_on\_special\_position
43. VIKLUX\_fumaric\_a\_on\_special\_position

44. WAXZEC\_cofomer\_on\_special\_position
45. WECGUI\_water\_on\_special\_position
46. XOGDEE\_solvent\_on\_special\_position
47. XOVBIU\_molecule\_on\_special\_position
48. YAWROF\_molecule\_on\_special\_position
49. YOWTAH01\_molecule\_on\_special\_position
50. YOYSUC\_molecule\_on\_special\_position
51. ZAZLER\_cofomer\_on\_special\_position
52. ZZZDRQ01\_molecule\_on\_special\_position
53. ZZZVZA05\_molecule\_on\_special\_position

Table 2: List of 24 disordered structures contained in the Drug Subset that were optimized using two conformers. These were thus present twice, denoted REFCODE\_1 and REFCODE\_2 in the following list of 732 optimized structures.

1. BEQGIN
2. BULCUG03
3. DIKWEA
4. DULKAX
5. FMDURD02
6. HAFNOR
7. IHOZOW
8. ILUSAL
9. JOWCAB02
10. KABZES
11. LCYSTN28
12. LERJID
13. MIFZIK
14. MUCDUK
15. NIQVIT
16. NUYSEG
17. PCLPMS
18. SEBPEU01
19. SIWCEG
20. SOYMID
21. TADZAZ03
22. VIGDAR
23. WETPOB
24. YIGPIO02

Table 3: List of structures where optimization failed or was not performed due to missing atoms, disorder, and/or combined with structural complexity.

1. ACXMAC
2. ADENTP<sup>3</sup>
3. AMASIS
4. BAGVUA
5. CEFMEN\_h
6. DAHREJ
7. FUFJUL<sup>4</sup>
8. IDIVOG<sup>5</sup>
9. JINGIW01
10. LUQREW
11. LUXYOU<sup>6</sup>
12. NAQLAU<sup>7</sup>
13. NUYSEG
14. NACGLY03\_h
15. OGIZEJ<sup>8</sup>
16. RUWHEX
17. SUCHOL12
18. SUDXAQ
19. TEZZUV\_h
20. TMTUBC\_h
21. TUCMEJ<sup>9</sup>
22. TUSHIZ<sup>10</sup>
23. YICMUS<sup>11</sup>
24. ZEFNOP

Table 4: List of 708 optimized structures. 732 structures are listed, because the 24 disordered structures appear twice, one for each optimized conformer.

1. ABABIQ\_r
2. ACEROR
3. ACHOLC
4. ACPRET03
5. ACSALA14
6. ACTDGU10\_h
7. ADENOS10
8. ADPOSM01\_h
9. ADRTAR
10. AHILOU
11. AIPBAR\_h
12. AKENOU
13. AKOFUD
14. AMAVEP
15. AMAVIT
16. AMAVOZ
17. AMBZCL
18. AMCAPR11
19. AMEQAK
20. AMEVET
21. AMMCHC11
22. AMOXCT10\_h
23. AMPCIH01
24. AMYTAL10\_h
25. ANIXAX
26. ANSTER10
27. ANTPYR
28. APUYOA02
29. ARFCYT10
30. ARFUAD
31. ARISOK\_h
32. ASPARM06
33. ASPART10
34. ATDZSA03
35. AXAKOA
36. BAFVOT
37. BAHDET
38. BASCUT\_h
39. BEDLUR
40. BEDMIG04
41. BENWUO
42. BEQGIN\_1
43. BEQGIN\_2
44. BEWKUJ15
45. BEZJIA

46. BIDFUQ  
47. BIHGUV  
48. BIHYEW10  
49. BIKHIN01  
50. BILJEN  
51. BIOTIN12  
52. BIRKES10  
53. BISMEV11  
54. BIXFOD\_h  
55. BIXGIY03\_h  
56. BIYSEH07  
57. BOCYAV  
58. BOLBOV  
59. BOMDUC  
60. BOVDUM  
61. BPYZDO21\_h  
62. BUBYII  
63. BUFPAV  
64. BUGJOC  
65. BUHCIQ\_h  
66. BULCUG03\_1  
67. BULCUG03\_2  
68. BZPENK01  
69. BZTRMS\_h  
70. CABCU06  
71. CAGWOW  
72. CAGWUC\_h  
73. CAGXUD  
74. CAKYOE  
75. CALDAU\_h  
76. CANDOM10\_h  
77. CANDUR  
78. CANFED  
79. CARPEQ\_h  
80. CATBOP  
81. CAVVUQ02  
82. CEKBEZ  
83. CELCIF  
84. CEPGLY\_h  
85. CEPHHM10\_h  
86. CETHNA\_h  
87. CEYHUJ01\_h  
88. CFHPRG  
89. CHEBAR01  
90. CIDDEZ  
91. CIHHIK01  
92. CIMETD02  
93. CINSEZ



94. CIPWUT\_h  
95. CIRTIG01\_h  
96. CISKUL  
97. CITREC01  
98. CITYIN10  
99. CIVFOC10  
100. CIYRIL\_h  
101. CLAMBU  
102. CLDZPA01  
103. CLEMAS02  
104. CLMPCL02  
105. CLONDC11  
106. CLPNXA  
107. COCHCL01  
108. COQWOU02  
109. CORYIR10\_h  
110. COTYEP  
111. COTYOA02  
112. COTYOA  
113. COVPIN03  
114. COXYOE  
115. COYSAK  
116. CPHNZP  
117. CPPBGC  
118. CPTAZP\_h  
119. CPTZAP\_h  
120. CREATH01  
121. CUBHUE  
122. CUYCEF01  
123. CUYDOQ\_w\_h  
124. CXMCYT  
125. CYPROT10  
126. DABJAR  
127. DACMOR01  
128. DAPSUO05  
129. DAQCII  
130. DARGOT03  
131. DAUNMY\_h  
132. DAXYUX01\_h  
133. DBEZPO01\_h  
134. DEFZEU  
135. DEMXUO  
136. DEQYIH  
137. DESNAR  
138. DEWHOC  
139. DEXMET11  
140. DEXPOX\_h  
141. DFIMZP01

142. DIAZOX  
143. DIGOXN10  
144. DIJWOJ  
145. DIKWEA\_1  
146. DIKWEA\_2  
147. DINXIJ  
148. DIRCIS  
149. DIVHOF02\_h  
150. DIWQIJ  
151. DIYYOB  
152. DIZPAM11  
153. DIZWAK\_h  
154. DLPROM02  
155. DLSERN31  
156. DMANTL07  
157. DMTYRS\_h  
158. DOLJIX\_h  
159. DOQBUI  
160. DPHPZL  
161. DPYALC  
162. DUDGAL  
163. DUJFAQ  
164. DUJPOO  
165. DUKTOS\_h  
166. DULKAX\_1  
167. DULKAX\_2  
168. DUNGAV  
169. DUNXAL\_h  
170. DUTRUF10  
171. DUVZOJ02\_h  
172. DXMTAS  
173. EDALEC\_m  
174. EFAXAM  
175. EFEHOO  
176. EFEMUX01  
177. EGINEP  
178. EHOXEE\_h  
179. EJEQAL  
180. ELIZAC  
181. ELOVAE01  
182. ELOVOS  
183. EMIQEY  
184. ENEBOQ  
185. EPHPMO  
186. EQONOP  
187. ESOURCE11  
188. ESTRIO  
189. ESTRON14

190. ETBBAR02  
191. ETCYPY01  
192. ETEXIK02  
193. ETHACN\_h  
194. ETHDPH05  
195. ETHUSS03  
196. ETPRGN\_h  
197. EVAFUD  
198. EXAQEA  
199. EXAQIE  
200. EXAQOK  
201. FABVAF01  
202. FAHFVAV01  
203. FAHMAC  
204. FAJKUW  
205. FAJMAE  
206. FANNEN\_h  
207. FARRUM02  
208. FAXYAG  
209. FDOURD01  
210. FEBHUP02  
211. FEFNEK  
212. FEMBII  
213. FETGAN  
214. FHMANE  
215. FIDYIA01  
216. FIFDON\_h  
217. FIKFIP  
218. FILGEM03\_h  
219. FIMNIY  
220. FIMTAW  
221. FINWEE\_h  
222. FISLIE  
223. FITPIH02  
224. FIXGAU01  
225. FIXNUV  
226. FIZWAM\_h  
227. FMDURD02\_1  
228. FMDURD02\_2  
229. FOGVIG02  
230. FOHLIY01  
231. FOLCAH03  
232. FOPYUE\_h  
233. FOQREK  
234. FORGAU01  
235. FOSPEA  
236. FOYMAH  
237. FPRTOD10

238. FUFTIK  
239. FUGSEF  
240. FUHGOE  
241. FUMKEF  
242. FUPDOJ  
243. FUPFAX\_h  
244. FUQMOU01  
245. FUWNIU  
246. FUXMOA01  
247. GABFOE\_h  
248. GAHHOM01  
249. GAKWIY\_h  
250. GALDEC01  
251. GAMFAC  
252. GAQTAU01  
253. GARFEK  
254. GEGJAD  
255. GEHXEX  
256. GERXAE  
257. GICHEG  
258. GICVUJ01\_h  
259. GIDLUB  
260. GILHAL  
261. GIMYEG  
262. GIXXOB  
263. GLCROL01  
264. GLUCIT  
265. GLUTAM02  
266. GLUTAS05  
267. GLYCIN99  
268. GODTIC  
269. GOHSUS  
270. GOLWIN  
271. GOPDUK01  
272. GORKUV01  
273. GRISFL02  
274. GUBLAS  
275. GUNKEH  
276. GUYGOX03\_h  
277. HAFNOR\_1  
278. HAFNOR\_2  
279. HAKJIM  
280. HANEDP10  
281. HAXHET\_h  
282. HCCYHG\_h  
283. HEPHCL10  
284. HERGOM\_h  
285. HEYGEX

286. HIJFAH  
287. HISHEX  
288. HISTPA15  
289. HMXBZP  
290. HOQHUQ  
291. HOTTER  
292. HUCHEU02  
293. HUHZEP  
294. HXVITD  
295. HYDLAZ01  
296. IBUNOJ  
297. ICRFRB10  
298. IDOXUR01  
299. IFOSAY  
300. IGAZUM\_h  
301. IHOZOW\_1  
302. IHOZOW\_2  
303. IHUHAW\_h  
304. IKACUT  
305. ILUSAL\_1  
306. ILUSAL\_2  
307. IMEHOY  
308. INAHZC\_h  
309. INOMUV  
310. IPILUQ  
311. IPMEPL  
312. IPRAMI\_h  
313. IQILAW  
314. IQISAE  
315. IQUMAI  
316. IVEGIA\_h  
317. IVUQIZ05  
318. IWOCON  
319. JAKGEH  
320. JAMRIY  
321. JAVCIS10  
322. JAZCET  
323. JEBNUZ\_h  
324. JIWPEL01  
325. JIWQAI03  
326. JODZUX  
327. JOHKUM  
328. JOPSUE  
329. JORJUX  
330. JOSWAP01\_h  
331. JOWCAB02\_1  
332. JOWCAB02\_2  
333. JUPDAB

334. JUYLEW  
335. JUYZOS  
336. KABGUR  
337. KABZES\_1  
338. KABZES\_2  
339. KAGCIE  
340. KASMOH  
341. KAXSEJ  
342. KCANRO  
343. KEBGAB01  
344. KEBVES\_h  
345. KEHBAA  
346. KEMZIL01  
347. KEYSOW  
348. KIDRAR01  
349. KIDWAW  
350. KIJMEX  
351. KIKWUW  
352. KIMDER  
353. KIPLEC  
354. KIWQUC  
355. KNMYSL  
356. KOFNIC  
357. KORSAL02\_h  
358. KORYUL  
359. KUGWIS\_h  
360. KUQDAC01\_h  
361. KURJAK  
362. KUTJIU  
363. LADTIT  
364. LAKZII  
365. LALNIN03  
366. LANLET  
367. LAQBAI  
368. LAQSON01  
369. LARGPH06  
370. LATPIH  
371. LATQAA  
372. LATSOQ01\_h  
373. LAYCET01  
374. LCYSTN28\_1  
375. LCYSTN28\_2  
376. LDOPAS03  
377. LEBLUB  
378. LERJID\_1  
379. LERJID\_2  
380. LESVEM  
381. LEXQIQ

382. LEZREO\_h  
383. LINTUX\_h  
384. LOPZEX  
385. LORCAW\_h  
386. LOSLEL  
387. LOWKOX\_h  
388. LTXPSE\_h  
389. LUDDUJ  
390. MACKUX  
391. MACXPR10  
392. MAFLAI\_h  
393. MCPRPL01  
394. MELATN01  
395. MELFIT09  
396. MEQCOB  
397. METHCL01  
398. MEXSEP  
399. MEYGII  
400. MHOCUM01  
401. MIFPOI  
402. MIFZIK\_1  
403. MIFZIK\_2  
404. MIGQID  
405. MIHZUA  
406. MIMOSN\_h  
407. MIRACD\_h  
408. MNIMET02  
409. MOKXIU  
410. MOKXOA  
411. MOPHAC  
412. MORPHM01  
413. MOSXUO  
414. MOVLOZ  
415. MOVYAY01\_h  
416. MOXAZO\_h  
417. MPIXPS\_h  
418. MPZPAM  
419. MTEPAM  
420. MTHPRG  
421. MUBPAB  
422. MUCDUK\_1  
423. MUCDUK\_2  
424. MUGKAA01  
425. MUYVAE\_h  
426. MVERIQ01  
427. NADREN  
428. NAJPOE  
429. NAKGOY

430. NALCYS10  
431. NAMDPC01\_m  
432. NANNUN  
433. NAPHZL10\_h  
434. NARBOY  
435. NAZLAC02  
436. NDNHCL01  
437. NEPHCL  
438. NEQGUM  
439. NEQHEY  
440. NESKED  
441. NETIND01  
442. NEVMOR  
443. NHPBZO\_h  
444. NICOAM05  
445. NIHMOH01  
446. NIKROP  
447. NILXOV\_m  
448. NIQVIT\_1  
449. NIQVIT\_2  
450. NIRRAH\_h  
451. NIVBIO\_h  
452. NOBDUF  
453. NOKGAX  
454. NORGES01  
455. NORMET\_h  
456. NUJDAX\_w  
457. NUPQEW  
458. NUYHUK  
459. NUYSEG\_1  
460. NUYSEG\_2  
461. OBEQAN01  
462. OCAHAC  
463. OFAZUQ  
464. OFEJOA  
465. OFILEW  
466. OGIXIN  
467. OMAKOE01  
468. OPOGAD  
469. OPOQER  
470. ORNHCL12  
471. OROZAX  
472. OXYTET01\_h  
473. PABHIJ01  
474. PAJNUJ  
475. PANCUR  
476. PBUMSL\_h  
477. PBUMSL



478. PCLPMS\_1  
479. PCLPMS\_2  
480. PEBGUC02  
481. PEDWOM  
482. PEKFAN  
483. PERPAZ  
484. PETHID\_h  
485. PEXKOS01  
486. PEYGOQ  
487. PGDEDO  
488. PHEPHR  
489. PICVUU01  
490. PIGSOO  
491. PILOCP01  
492. PIMKOL  
493. PIMOZD  
494. PINDON  
495. PIPAMP  
496. PIPCIL\_h  
497. PIRENA10\_w  
498. PIWLEM02  
499. PMEPEN01  
500. POBKOG  
501. POFORM\_m  
502. POGKOM  
503. PRAZAM\_h  
504. PRGDOL02  
505. PROCPH  
506. PROGLE20\_h  
507. PROGST12  
508. PUFGUU  
509. PUQGUF  
510. PUVMAU  
511. PUVRIH  
512. PYRXCL01  
513. PYRZIN23  
514. QABCII  
515. QABTOD01  
516. QATNEF01  
517. QECHOV03  
518. QEMLIE  
519. QETZUL  
520. QICMEU\_h  
521. QIFKEX01  
522. QIJPAC  
523. QIJZOY  
524. QIQKEI  
525. QIQLIL

526. QOMKUA  
527. QQQAEJ02  
528. QQQAUG04  
529. QQQBSS01\_h  
530. QUBQIO01  
531. QURWOQ02  
532. QUZWOY  
533. RALMIA  
534. RALMOG01  
535. RASTAG\_m  
536. RAVPUB  
537. RBFLAV10\_h  
538. REBCIL  
539. REDNIX  
540. REZBII  
541. RIGDES  
542. RILQOU  
543. RINTIT  
544. RIQFOO  
545. RIWKOX  
546. ROKNUB  
547. ROQLOA  
548. RSERPNO1  
549. RUKBOP  
550. RUKQOF  
551. RUTGOE  
552. RUTGUK  
553. RUWBAM  
554. RUYZAO  
555. SAFNIW  
556. SAHSOJ\_h  
557. SAJFIT  
558. SAJNOG\_h  
559. SAQYIR  
560. SATHOL  
561. SAWFIF\_h  
562. SAXFED  
563. SAXQIT  
564. SAZLAG  
565. SAZNOW\_m  
566. SEBPEU01\_1  
567. SEBPEU01\_2  
568. SEBPEU01  
569. SENJIF  
570. SEQKAA02  
571. SEQNIL  
572. SESKUY01  
573. SETSOA

574. SFDMOX05\_h  
575. SIFGOD  
576. SIJWUF  
577. SIKLIH07  
578. SIWCEG\_1  
579. SIWCEG\_2  
580. SLFNMB02  
581. SLFNMC20\_h  
582. SLFNMG01  
583. SLFSXZ12  
584. SOBBUG\_h  
585. SONKEM  
586. SOPSEV  
587. SOYMID\_1  
588. SOYMID\_2  
589. SUJXUR  
590. SUTHAZ37  
591. SUTWIO  
592. SUVGUL  
593. SUWNUT  
594. TADLIU02  
595. TADZAZ03\_1  
596. TADZAZ03\_2  
597. TAJFOZ\_h  
598. TANDET  
599. TAYFUV\_h  
600. TAZZUP  
601. TEPSAM\_h  
602. TESTON10  
603. TETCYH12  
604. TEZZEE  
605. TFPROM10  
606. THCLCS\_h  
607. THGUAN10  
608. TIJMII  
609. TIPWAQ\_h  
610. TITHYN10\_h  
611. TIYQAU01  
612. TMPHCL01  
613. TOKSES\_h  
614. TOPXED\_m  
615. TOXXIN\_h  
616. TOYJOG  
617. TOYSUX  
618. TRHTRT\_h  
619. TUBOBM\_h  
620. TULRIB\_m  
621. TUQGET

622. TUTDOD  
623. TUZCOI  
624. UCUVET  
625. UGIYEP  
626. UHUQUK  
627. UKAKIA  
628. UKIFIE\_h  
629. UMOMAL  
630. UPUKOH  
631. UQAPEJ  
632. URAVUG  
633. UREA0H12  
634. USOCOV  
635. UXIXUV  
636. VAMBOA01  
637. VAWPIT  
638. VAWQEQ  
639. VAYJOW  
640. VAYXOI  
641. VEMRAI  
642. VEVQAQ  
643. VICXOV  
644. VIDJEX01  
645. VIFQIL  
646. VIGDAR\_1  
647. VIGDAR\_2  
648. VOGCAV\_h  
649. VOXDUH  
650. VUCDUS  
651. VUCJEI  
652. VUJRUO\_h  
653. VUXPUZ  
654. WACHIR\_h  
655. WADPIC  
656. WADTIG  
657. WAHJAR  
658. WAJYUC  
659. WALPIJ  
660. WASGAA\_h  
661. WAWVOH  
662. WEHYEO  
663. WELGAV  
664. WEMGEC  
665. WEQHEF01\_h  
666. WERVEU02  
667. WETLOY  
668. WETPOB\_1  
669. WETPOB\_2

670. WEXQAS01  
671. WEZCOT  
672. WIBZEM  
673. WINJAE\_m  
674. WINWUL02  
675. WIPYOL  
676. WOQDAH  
677. WOYPAB  
678. WURPUU  
679. WUTHEA01  
680. XANTOX\_h  
681. XAPTAK01  
682. XAQNOU  
683. XATJAF  
684. XAVTOF02  
685. XAYGEJ01  
686. XAZRUN  
687. XEJKUS  
688. XEZTON01  
689. XICRUY  
690. XIJKIK01  
691. XIRHOX  
692. XOCXUI01  
693. XOGMOX  
694. XOJNOB  
695. XOSGUH  
696. XOZRUZ  
697. XULRUT  
698. YACGUE\_h  
699. YACHAL\_h  
700. YACTEC01  
701. YALWIS  
702. YALYUH  
703. YAPZEU  
704. YARXEW  
705. YIGPIO02\_1  
706. YIGPIO02\_2  
707. YIGRAI  
708. YIKNUD  
709. YIYRAZ  
710. YODXAR  
711. YOKQAQ  
712. YUKVAD  
713. YURSUB\_h  
714. ZAPLEJ  
715. ZAPXOF  
716. ZEMJOQ  
717. ZENREP

|      |            |
|------|------------|
| 718. | ZIDLED     |
| 719. | ZIKJOS     |
| 720. | ZIMBOO     |
| 721. | ZIVKEU     |
| 722. | ZIZRUX01   |
| 723. | ZOGSOD     |
| 724. | ZOXSEK     |
| 725. | ZUHFIR     |
| 726. | ZUQMIJ_h   |
| 727. | ZZZECG01   |
| 728. | ZZZPNG01   |
| 729. | ZZZPUS19   |
| 730. | ZZZRCG01_h |
| 731. | ZZZSHG01   |
| 732. | ZZZTSE03   |

| refcode     | rmsd                                               |         | Tanimoto_rmsd |
|-------------|----------------------------------------------------|---------|---------------|
| ABABIQ_ro   |                                                    | 0.10962 | 0.99925       |
| ACERORo     |                                                    | 0.05292 | 0.99956       |
| ACHOLCo     |                                                    | 0.14007 | 0.99662       |
| ACPRET03o   |                                                    | 0.06479 | 0.99975       |
| ACSALA14o   |                                                    | 0.03692 | 0.99975       |
| ACTDGU10_ho |                                                    | 0.19352 | 0.99882       |
| ADENOS10o   |                                                    | 0.04381 | 0.9998        |
| ADPOSM01_ho |                                                    | 1.29284 | 0.86729       |
| ADRTARo     |                                                    | 0.09257 | 0.99897       |
| AHILOUo     |                                                    | 0.16949 | 0.99922       |
| AIPBAR_ho   |                                                    | 0.08951 | 0.99859       |
| AKENOUo     |                                                    | 0.18442 | 0.9992        |
| AKOFUDo     |                                                    | 0.08304 | 0.99952       |
| AMAVEPo     |                                                    | 0.07934 | 0.99939       |
| AMAVITo     |                                                    | 0.06364 | 0.99952       |
| AMAVOZo     |                                                    | 0.07694 | 0.99961       |
| AMBZCLo     |                                                    | 0.06669 | 0.99966       |
| AMCAPR11o   |                                                    | 0.12386 | 0.99818       |
| AMEQAKo     |                                                    | 0.04025 | 0.9999        |
| AMEVETo     |                                                    | 0.08915 | 0.99963       |
| AMMCHC11o   |                                                    | 0.11217 | 0.99804       |
| AMOXCT10_ho |                                                    | 0.11275 | 0.99918       |
| AMPCIH01o   |                                                    | 0.0806  | 0.99957       |
| AMYTAL10_ho |                                                    | 0.04831 | 0.99968       |
| ANIXAXo     |                                                    | 0.05647 | 0.99966       |
| ANSTER10o   |                                                    | 0.04046 | 0.99986       |
| ANTPYRo     |                                                    | 0.05262 | 0.99958       |
| APUYOAO2o   |                                                    | 0.09924 | 0.99951       |
| ARFCYT10o   |                                                    | 0.05835 | 0.99958       |
| ARFUADo     |                                                    | 0.07592 | 0.99936       |
| ASPARM06o   |                                                    | 0.05009 | 0.99932       |
| ASPART10o   | Initially two hydrogen atoms missing,<br>corrected |         | n/a           |
| ATDZSA03o   |                                                    | 0.07522 | 0.99932       |
| AXAKOAO     |                                                    | 0.1522  | 0.99817       |
| BAFVOTo     |                                                    | 0.03027 | 0.99984       |
| BAHDETo     |                                                    | 0.141   | 0.99835       |
| BASCUT_ho   |                                                    | 0.12558 | 0.99771       |
| BEDLURo     |                                                    | 0.07748 | 0.99973       |
| BEDMIG04o   |                                                    | 0.22336 | 0.99477       |
| BENWUOo     |                                                    | 0.04949 | 0.99977       |
| BEQGIN_1o   |                                                    | 0.12694 | 0.999         |
| BEQGIN_2o   |                                                    | 0.35614 | 0.99218       |
| BEWKUJ15o   |                                                    | 0.06383 | 0.99954       |
| BEZJIAo     |                                                    | 0.06415 | 0.99969       |
| BIDFUQo     |                                                    | 0.07285 | 0.99984       |
| BIHGUVo     |                                                    | 0.16461 | 0.99736       |
| BIHYEW10o   |                                                    | 0.06408 | 0.99946       |
| BIKHIN01o   |                                                    | 0.02317 | 0.99985       |
| BILJENo     |                                                    | 0.1137  | 0.99888       |

|             |         |         |
|-------------|---------|---------|
| BIOTIN12o   | 0.06949 | 0.9996  |
| BIRKES10o   | 0.16381 | 0.9985  |
| BISMEV11o   | 0.04256 | 0.99959 |
| BIXFOD_ho   | 0.13603 | 0.99784 |
| BIXGIY03_ho | 0.04319 | 0.99981 |
| BIYSEH07o   | 0.08263 | 0.9995  |
| BOCYAVo     | 0.08305 | 0.99951 |
| BOLBOVo     | 0.09515 | 0.99982 |
| BOMDUCo     | 0.077   | 0.99955 |
| BOVDUMo     | 0.29245 | 0.99613 |
| BPYZDO21_ho | 0.12853 | 0.9985  |
| BUBYIlo     | 0.05154 | 0.99965 |
| BUFPAVo     | 0.10324 | 0.99892 |
| BUGJOCo     | 0.04629 | 0.99985 |
| BUHCIQ_ho   | 0.08469 | 0.99936 |
| BULCUG03_1o | 0.02467 | 0.99977 |
| BULCUG03_2o | 0.02469 | 0.99977 |
| BULCUG03_3o | 0.02482 | 0.99977 |
| BULCUG03_4o | 0.02461 | 0.99977 |
| BULCUG03_5o | 0.02368 | 0.99979 |
| BULCUG03_6o | 0.02401 | 0.99979 |
| BULCUG03_7o | 0.02402 | 0.99979 |
| BULCUG03_8o | 0.02402 | 0.99979 |
| BZTRMS_ho   | 0.10244 | 0.99912 |
| CABCUD06o   | 0.08292 | 0.99955 |
| CAGWOWo     | 0.07614 | 0.99937 |
| CAGWUC_ho   | 1.78426 | 0.73287 |
| CAGXUDo     | 0.0887  | 0.99931 |
| CAKYOEo     | 0.04337 | 0.99982 |
| CALDAU_ho   | 0.11941 | 0.99946 |
| CANDOM10_ho | 0.11674 | 0.99914 |
| CANDURo     | 0.07844 | 0.99919 |
| CANFEDo     | 0.07756 | 0.99938 |
| CARPEQ_ho   | 0.43989 | 0.99003 |
| CATBOPo     | 0.07741 | 0.9994  |
| CAVVUQ02o   | 0.57497 | 0.96508 |
| CEKBEZo     | 0.0827  | 0.99958 |
| CELCIFo     | 0.10233 | 0.99961 |
| CEPGLY_ho   | 0.25241 | 0.99651 |
| CEPHHM10_ho | 0.11777 | 0.9993  |

Considerable changes in optimized structure. Input structure without H. Ion shifted considerably. OK

|             |         |         |
|-------------|---------|---------|
| CETHNA_ho   |         | n/a     |
| CFHPRGo     | 0.13751 | 0.99874 |
| CHEBAR01o   | 0.06957 | 0.99936 |
| CIDDEZo     | 0.07596 | 0.99908 |
| CIHHIK01o   | 0.13656 | 0.99844 |
| CIMETD02o   | 0.12948 | 0.9985  |
| CINSEZo     | 0.103   | 0.99948 |
| CIPWUT_ho   | 0.10846 | 0.99881 |
| CIRTIG01_ho | 0.27882 | 0.99536 |



|             |           |         |         |
|-------------|-----------|---------|---------|
| CISKULo     |           | 0.22902 | 0.99825 |
| CITYIN10o   |           | 0.10905 | 0.99888 |
| CIVFOC10o   |           | 0.05992 | 0.99944 |
| CIYRIL_ho   |           | 0.04875 | 0.9998  |
| CLAMBUo     |           | 0.15218 | 0.99837 |
| CLDZPA01o   |           | 0.10356 | 0.99883 |
| CLEMAS02o   |           | 0.14308 | 0.99845 |
| CLMPCL02o   |           | 0.08617 | 0.9993  |
| CLONDC11o   |           | 0.12006 | 0.99792 |
| CLPNXAo     |           | 0.03572 | 0.99994 |
| COCHCL01o   |           | 0.06109 | 0.99969 |
| COQWOU02o   |           | 0.09949 | 0.99934 |
| CORYIR10_ho |           | 0.09474 | 0.99895 |
| COTYEPo     |           | 0.0406  | 0.99978 |
| COTYOA02o   |           | 0.11046 | 0.99806 |
| COTYOAo     |           | 0.13901 | 0.99807 |
| COVPIN03o   |           | 0.09276 | 0.99938 |
| COXYOEo     |           | 0.12382 | 0.99864 |
| COYSAKo     |           | 0.05711 | 0.99969 |
| CPHNZPo     |           | 0.09412 | 0.99913 |
| CPPBGCo     |           | 0.22256 | 0.99566 |
| CPTAZP_ho   |           | 1.38006 | 0.92718 |
| CPTZAP_ho   |           | 0.08739 | 0.99924 |
| CREATH01o   |           | 0.08448 | 0.99819 |
| CUBHUEo     |           | 0.06637 | 0.99934 |
| CUYCEF01o   |           | 0.08657 | 0.99948 |
| CUYDOQ_w_ho |           | 0.04818 | 0.9997  |
| CXMCYTo     |           | 0.0866  | 0.99912 |
| CYPROT10o   |           | 0.04715 | 0.99985 |
| DABJARo     |           | 0.07619 | 0.99959 |
| DACMOR01o   |           | 0.26037 | 0.99386 |
| DAPSUO05o   |           | 0.05112 | 0.99973 |
| DAQCIIo     |           | 0.069   | 0.99971 |
| DARGOT03o   |           | 0.08415 | 0.99971 |
| DAUNMY_ho   |           | 0.14928 | 0.99895 |
| DAXYUX01_ho |           | 0.16565 | 0.99835 |
| DBEZPO01_ho |           | 0.06578 | 0.99968 |
| DEFZEUo     |           | 0.08982 | 0.99946 |
| DEMXUOo     |           | 0.08621 | 0.99882 |
| DEQYIHo     |           | 0.04534 | 0.9998  |
| DESNARo     | 0.131, OK |         |         |
| DEWHOCo     |           | 0.04765 | 0.99976 |
| DEXMET11o   |           | 0.07047 | 0.99964 |
| DEXPOX_ho   |           | 0.15367 | 0.99794 |
| DFIMZP01o   |           | 0.07801 | 0.99939 |
| DIAZOXo     |           | 0.03537 | 0.99981 |
| DIGOXN10o   |           | 0.12445 | 0.99977 |
| DIJWOJo     |           | 0.12776 | 0.99942 |
| DINXIJo     |           | 0.21488 | 0.99885 |
| DIRCISo     |           | 0.12426 | 0.99935 |

|             |                                                                        |         |
|-------------|------------------------------------------------------------------------|---------|
| DIVHOF02_ho | 0.61576                                                                | 0.97992 |
| DIWQIJJo    | 0.11525                                                                | 0.99955 |
| DIYYOBo     | 0.0617                                                                 | 0.99953 |
| DIZPAM11o   | 0.0451                                                                 | 0.99979 |
| DIZWAK_ho   | 0.06928                                                                | 0.99973 |
| DLPROM02o   | 0.04439                                                                | 0.9994  |
| DLSERN31o   | 0.08911                                                                | 0.99712 |
| DMANTL07o   | 0.0237                                                                 | 0.99991 |
| DMTYRS_ho   | 0.04613                                                                | 0.99969 |
| DOLJIX_ho   | 0.34664                                                                | 0.98908 |
| DOQBUIo     | 0.0951                                                                 | 0.9995  |
| DPHPZLo     | 0.1102                                                                 | 0.99879 |
| DPYALCo     | 0.17146                                                                | 0.99758 |
| DUDGALo     | 0.05584                                                                | 0.9997  |
| DUJFAQo     | 0.15444                                                                | 0.99903 |
| DUKTOS_ho   | 1.61333                                                                | 0.81462 |
| DULKAX_1o   | 0.11129                                                                | 0.99945 |
| DULKAX_2o   | 0.26958                                                                | 0.99677 |
| DUNGAVo     | 0.08791                                                                | 0.99926 |
| DUNXAL_ho   | 0.15772                                                                | 0.99927 |
| DUTRUF10o   | 0.11135                                                                | 0.99943 |
| DUVZOJ02_ho | 0.11271                                                                | 0.99845 |
| DXMTASo     | 0.09835                                                                | 0.99931 |
| EDALEC_mo   | P-XRD structure with considerable differences to optimized one, OK n/a |         |
| EFAXAMo     | 0.13809                                                                | 0.99973 |
| EFEHOOo     | 0.07661                                                                | 0.99979 |
| EFEMUX01o   | 0.04681                                                                | 0.99973 |
| EGINEPo     | 0.09409                                                                | 0.99945 |
| EHOXEE_ho   | 0.13647                                                                | 0.99865 |
| EJEQALo     | 0.10494                                                                | 0.99933 |
| ELIZACo     | 0.10226                                                                | 0.99918 |
| ELOVAE01o   | 0.02879                                                                | 0.99989 |
| ELOVOSo     | 0.05711                                                                | 0.99986 |
| EMIQEYo     | 0.2706                                                                 | 0.99666 |
| ENEBOQo     | 0.15034                                                                | 0.9975  |
| EPHPMOo     | 0.06313                                                                | 0.99935 |
| EQONOPo     | 0.23767                                                                | 0.99532 |
| ESOURE11o   | 0.02618                                                                | 0.99994 |
| ESTRIOo     | 0.05159                                                                | 0.99978 |
| ESTRON14o   | 0.05059                                                                | 0.99977 |
| ETBBAR02o   | 0.07399                                                                | 0.99919 |
| ETCYPY01o   | 0.04293                                                                | 0.99968 |
| ETEXIK02o   | 0.08854                                                                | 0.99925 |
| ETHACN_ho   | 0.73812                                                                | 0.96026 |
| ETHDPH05o   | 0.12333                                                                | 0.99665 |
| ETHUSS03o   | 0.06435                                                                | 0.99965 |
| ETPRGN_ho   | 0.56779                                                                | 0.97142 |
| EVAFUDo     | 0.04249                                                                | 0.99983 |
| EXAQEAo     | 0.10733                                                                | 0.99908 |
| EXAQIEo     | 0.05257                                                                | 0.99972 |

|             |            |         |         |
|-------------|------------|---------|---------|
| EXAQOKo     |            | 0.04498 | 0.9998  |
| FABVAF01o   |            | 0.15763 | 0.99829 |
| FAHFVAV01o  |            | 0.10849 | 0.9992  |
| FAHMACo     |            | 0.10082 | 0.99926 |
| FAJKUWo     |            | 0.16041 | 0.99864 |
| FAJMAEo     |            | 0.13122 | 0.99893 |
| FANNEN_ho   | 0.0853, OK |         | n/a     |
| FARRUM02o   |            | 0.05746 | 0.99985 |
| FAXYAGo     |            | 0.19805 | 0.99821 |
| FDOURD01o   |            | 0.06256 | 0.99956 |
| FEBHUP02o   |            | 0.047   | 0.99988 |
| FEFNEKo     |            | 0.0782  | 0.99954 |
| FEMBIIo     |            | 0.11881 | 0.9994  |
| FETGANo     |            | 0.07326 | 0.99981 |
| FHMANEo     |            | 0.05817 | 0.99969 |
| FIFDON_ho   |            | 0.06325 | 0.99976 |
| FIKFIPo     |            | 0.06422 | 0.99955 |
| FILGEM03_ho |            | 0.05022 | 0.99972 |
| FIMNIYo     |            | 0.16089 | 0.99756 |
| FIMTAWo     |            | 0.10236 | 0.99905 |
| FINWEE_ho   |            | 0.18695 | 0.99874 |
| FISLIEo     |            | 0.21804 | 0.99415 |
| FITPIH02o   |            | 0.02886 | 0.99984 |
| FIXGAU01o   |            | 0.07751 | 0.99942 |
| FIXNUVo     |            | 0.30538 | 0.99066 |
| FIZWAM_ho   |            | 2.1554  | 0.81824 |
| FMDURD02_1o |            | 0.09604 | 0.99903 |
| FMDURD02_2o |            | 0.46354 | 0.97838 |
| FOGVIG02o   |            | 0.0862  | 0.99924 |
| FOHLIY01o   |            | 0.05938 | 0.9995  |
| FOLCAH03o   |            | 0.16186 | 0.99918 |
| FOPYUE_ho   |            | 0.14679 | 0.99949 |
| FOQREKo     |            | 0.03568 | 0.99985 |
| FORGAU01o   |            | 0.08504 | 0.99952 |
| FOSPEAo     |            | 0.09092 | 0.99767 |
| FOYMAHo     |            | 0.0536  | 0.99928 |
| FPRTOD10o   |            | 0.07823 | 0.99955 |
| FUFTIKo     |            | 0.08343 | 0.99892 |
| FUGSEFo     |            | 0.09305 | 0.99927 |
| FUHGOEo     |            | 0.07015 | 0.99957 |
| FUMKEFo     |            | 0.07401 | 0.99953 |
| FUPDOJo     |            | 0.08922 | 0.99958 |
| FUQMOU01o   |            | 0.24981 | 0.99438 |
| FUWNIUo     |            | 0.10236 | 0.9988  |
| FUXMOA01o   |            | 0.04601 | 0.99983 |
| GABFOE_ho   |            | 0.30211 | 0.9963  |
| GAKWIY_ho   |            | 0.12795 | 0.99926 |
| GALDEC01o   |            | 0.02062 | 0.99989 |
| GAMFACo     |            | 0.09087 | 0.99907 |
| GAQTAU01o   |            | 0.02325 | 0.99993 |

|             |                                     |         |
|-------------|-------------------------------------|---------|
| GARFEKo     | 0.13618                             | 0.99857 |
| GEHXEXo     | 0.03755                             | 0.99986 |
| GERXAEo     | 0.19917                             | 0.99801 |
| GICHEGo     | 0.34667                             | 0.99164 |
| GICVUJ01_ho | 0.07365                             | 0.99977 |
| GIDLUBo     | 0.02568                             | 0.99987 |
| GILHALo     | 0.0747                              | 0.99979 |
| GIMYEGo     | 0.10895                             | 0.99963 |
| GIXXOBo     | 0.06733                             | 0.99986 |
| GLCROL01o   | 0.01897                             | 0.99988 |
| GLUCITo     | 0.24703                             | 0.99105 |
| GLUTAM02o   | 0.15289                             | 0.99577 |
| GLUTAS05o   | 0.18215                             | 0.99777 |
| GLYCIN99o   | 0.14877                             | 0.98915 |
| GODTICo     | 0.0445                              | 0.99982 |
| GOHSUSo     | 0.0917                              | 0.99934 |
| GOLWINo     | 0.0422                              | 0.99989 |
| GOPDUK01o   | 0.16992                             | 0.99851 |
| GORKUV01o   | 0.58293                             | 0.9524  |
| GRISFL02o   | 0.07489                             | 0.9995  |
| GUBLASo     | 0.15622                             | 0.99878 |
| GUNKEHo     | 0.06835                             | 0.99976 |
| GUYGOX03_ho | 0.2156                              | 0.99652 |
| HAFNOR_1o   | 0.30616                             | 0.99625 |
| HAFNOR_2o   | 0.36496                             | 0.99469 |
| HAKJIM_ho   | H was initially missing. Corrected. | n/a     |
| HANEDP10o   | 0.08547                             | 0.99937 |
| HAXHET_ho   | 0.11878                             | 0.99948 |
| HCCYHG_ho   | 0.11827                             | 0.99735 |
| HEPHCL10o   | 0.03082                             | 0.99988 |
| HERGOM_ho   | 0.12258                             | 0.99945 |
| HEYGEXo     | 0.03909                             | 0.99978 |
| HIJFAHo     | 0.1539                              | 0.99919 |
| HISHEXo     | 0.06325                             | 0.99958 |
| HISTPA15o   | 0.04951                             | 0.99962 |
| HMXBZPo     | 0.04678                             | 0.99979 |
| HOQHUQo     | 0.01123                             | 0.99994 |
| HOTTERo     | 0.08056                             | 0.99939 |
| HUCHEU02o   | 0.12968                             | 0.99947 |
| HUHZEPo     | 0.06862                             | 0.9995  |
| HXVITDo     | 0.04126                             | 0.99994 |
| HYDLAZ01o   | 0.0484                              | 0.99955 |
| IBUNOJo     | 0.05303                             | 0.9997  |
| ICRFRB10o   | 0.04168                             | 0.99987 |
| IDOXUR01o   | 0.05415                             | 0.99967 |
| IFOSAYo     | 0.06216                             | 0.99957 |
| IHOZOW_1o   | 0.21223                             | 0.99743 |
| IHOZOW_2o   | 0.32726                             | 0.99394 |
| IHUHAW_ho   | 0.26596                             | 0.99691 |
| IKACUTo     | 0.02813                             | 0.99984 |

|             |           |         |         |
|-------------|-----------|---------|---------|
| ILUSAL_1o   |           | 0.07959 | 0.99962 |
| IMEHOYo     |           | 0.08374 | 0.99922 |
| INAHZC_ho   |           | 0.07816 | 0.99878 |
| INOMUVo     |           | 0.06678 | 0.99967 |
| IPILUQo     |           | 0.07306 | 0.99963 |
| IPMEPLo     |           | 0.01962 | 0.99993 |
| IPRAMI_ho   |           | 0.13013 | 0.99856 |
| IQILAWo     |           | 0.07373 | 0.99981 |
| IQISAEo     |           | 0.18946 | 0.99777 |
| IQUMAIo     |           | 0.11398 | 0.99908 |
| IVUQIZ05o   |           | 0.06183 | 0.99964 |
| IWOCONo     |           | 0.06021 | 0.99976 |
| JAKGEHo     |           | 0.06924 | 0.9996  |
| JAMRIYo     |           | 0.06701 | 0.99886 |
| JAZCETo     |           | 0.35546 | 0.99744 |
| JEBNUZ_ho   |           | 0.23532 | 0.9968  |
| JIWPEL01o   |           | 0.11087 | 0.99912 |
| JIWQAI03o   |           | 0.07602 | 0.99961 |
| JODZUXo     |           | 0.39612 | 0.99392 |
| JOHKUMo     |           | 0.13805 | 0.99907 |
| JOPSUEo     |           | 0.05955 | 0.99956 |
| JORJUXo     |           | 0.08261 | 0.99942 |
| JOSWAP01_ho |           | 0.11319 | 0.99913 |
| JOWCAB02_1o |           | 0.10776 | 0.9996  |
| JOWCAB02_2o |           | 0.25153 | 0.99784 |
| JUPDABo     |           | 0.06133 | 0.99934 |
| JUYLEWo     |           | 0.03238 | 0.99987 |
| JUYZOSo     |           | 0.07788 | 0.99952 |
| KABGURo     |           | 0.0979  | 0.99901 |
| KABZES_1o   |           | 0.23063 | 0.9959  |
| KABZES_2o   |           | 0.23489 | 0.99574 |
| KAGCIEo     |           | 0.14225 | 0.99896 |
| KASMOHo     |           | 0.0831  | 0.9992  |
| KAXSEJo     |           | 0.03113 | 0.9999  |
| KEBGAB01o   |           | 0.08246 | 0.99864 |
| KEBVES_ho   |           | 0.63653 | 0.98137 |
| KEHBAAo     |           | 0.15385 | 0.99903 |
| KEMZIL01o   |           | 0.00245 | 0.99998 |
| KEYSOWo     |           | 0.20762 | 0.99651 |
| KIDRAR01o   |           | 0.07301 | 0.99964 |
| KIDWAWo     |           | 0.14639 | 0.99876 |
| KIJMEXo     |           | 0.08174 | 0.99949 |
| KIKWUWo     |           | 0.13292 | 0.99887 |
| KIMDERo     |           | 0.11794 | 0.99939 |
| KIPLECo     |           | 0.11329 | 0.99933 |
| KIWQUCo     | 0.162, OK |         | n/a     |
| KNMYSLo     |           | 0.13311 | 0.99912 |
| KOFNICo     |           | 0.09246 | 0.99903 |
| KORSAL02_ho |           | 0.06568 | 0.9981  |
| KORYULo     |           | 0.04068 | 0.99984 |

|             |         |         |
|-------------|---------|---------|
| KUGWIS_ho   | 0.08963 | 0.99925 |
| KUQDAC01_ho | 0.1885  | 0.99785 |
| KURJAKo     | 0.10878 | 0.9978  |
| KUTJIUo     | 0.08488 | 0.99933 |
| LADTITo     | 0.03506 | 0.99984 |
| LAKZIIo     | 0.18684 | 0.99841 |
| LALNIN03o   | 0.10104 | 0.99573 |
| LANLETo     | 0.06283 | 0.99966 |
| LAQBAlO     | 0.04132 | 0.99984 |
| LAQSON01o   | 0.13359 | 0.99921 |
| LARGPH06o   | 0.12111 | 0.99816 |
| LATPIHo     | 0.11703 | 0.99898 |
| LATQA Ao    | 0.10556 | 0.99925 |
| LAYCET01o   | 0.05042 | 0.99974 |
| LCYSTN28_1o | 0.11336 | 0.9957  |
| LCYSTN28_2o | 0.03481 | 0.99959 |
| LDOPAS03o   | 0.04774 | 0.99975 |
| LESVEMo     | 0.07517 | 0.99978 |
| LEXQIQo     | 0.0951  | 0.99949 |
| LINTUX_ho   | 0.03153 | 0.99988 |
| LOPZEXo     | 0.25765 | 0.9973  |
| LORCAW_ho   | 0.06848 | 0.99958 |
| LTXPSE_ho   | 0.10068 | 0.99883 |
| LUDDUJo     | 0.17077 | 0.99745 |
| MACKUXo     | 0.09777 | 0.99951 |
| MACXPR10o   | 0.06703 | 0.99969 |
| MCPRPL01o   | 0.06725 | 0.99936 |
| MELATN01o   | 0.06661 | 0.99966 |
| MELFIT09o   | 0.19868 | 0.99899 |
| MEQCOBo     | 0.09652 | 0.99973 |
| METHCL01o   | 0.15682 | 0.99557 |
| MEXSEPo     | 0.03772 | 0.99986 |
| MEYGIIo     | 0.11699 | 0.99808 |
| MHOCUM01o   | 0.09383 | 0.99938 |
| MIFPOIo     | 0.02687 | 0.99994 |
| MIFZIK_1o   | 0.16046 | 0.99618 |
| MIFZIK_2o   | 0.17576 | 0.99543 |
| MIGQIDo     | 0.06523 | 0.99955 |
| MIHZUAo     | 0.09869 | 0.99935 |
| MIMOSN_ho   | 0.06378 | 0.99953 |
| MIRACD_ho   | 0.48916 | 0.98407 |
| MNIMET02o   | 0.07684 | 0.99879 |
| MOKXIUo     | 0.1871  | 0.99858 |
| MOKXOAo     | 0.08621 | 0.99959 |
| MOPHACo     | 0.06137 | 0.99935 |
| MORPHM01o   | 0.0489  | 0.99968 |
| MOSXUOo     | 0.02285 | 0.99991 |
| MOVLOZo     | 0.27855 | 0.97669 |
| MOVYAY01_ho | 0.182   | 0.99844 |
| MOXAZO_ho   | 0.06206 | 0.99896 |

|             |                                      |         |         |
|-------------|--------------------------------------|---------|---------|
| MPIXPS_ho   | 0.503, molecule was shifted, OK      | n/a     |         |
| MPZPAMo     |                                      | 0.04426 | 0.99983 |
| MTEPAMo     |                                      | 0.07018 | 0.99975 |
| MTHPRGo     |                                      | 0.06835 | 0.99967 |
| MUBPABo     |                                      | 0.07506 | 0.99956 |
| MUCDUK_1o   |                                      | 0.11722 | 0.99888 |
| MUCDUK_2o   |                                      | 0.89743 | 0.93625 |
| MUGKAA01o   |                                      | 0.04067 | 0.99975 |
| MUYVAE_ho   |                                      | 0.11963 | 0.99838 |
| MVERIQ01o   |                                      | 0.06224 | 0.99971 |
| NADRENo     |                                      | 0.02977 | 0.99987 |
| NAJPOEo     |                                      | 0.1776  | 0.99881 |
| NAKGOYo     |                                      | 0.04871 | 0.99956 |
| NALCYS10o   |                                      | 0.11783 | 0.99719 |
| NAMDPC01_mo | 0.0249, OK                           | n/a     |         |
| NANNUNo     |                                      | 0.08421 | 0.99934 |
| NARBOYo     |                                      | 0.16148 | 0.99692 |
| NAZLAC02o   |                                      | 0.1739  | 0.99891 |
| NDNHCL01o   |                                      | 0.08564 | 0.9994  |
| NEPHCLo     |                                      | 0.03218 | 0.99979 |
| NEQGUMo     |                                      | 0.15798 | 0.99872 |
| NEQHEYo     |                                      | 0.1168  | 0.99932 |
| NESKEDo     |                                      | 0.07268 | 0.99958 |
| NETIND01o   |                                      | 0.04863 | 0.99981 |
| NEVMORo     |                                      | 0.0407  | 0.99973 |
| NHPBZO_ho   |                                      | 0.11397 | 0.99874 |
| NICOAM05o   |                                      | 0.0205  | 0.99989 |
| NIHMOH01o   |                                      | 0.1863  | 0.99801 |
| NIKROPo     |                                      | 0.12923 | 0.99824 |
| NILXOV_mo   | Molecules shifted into unit cell, OK | n/a     |         |
| NIQVIT_1o   |                                      | 0.10167 | 0.99947 |
| NIQVIT_2o   |                                      | 0.3545  | 0.99358 |
| NIRRAH_ho   |                                      | 0.20923 | 0.99832 |
| NIVBIO_ho   |                                      | 0.27073 | 0.99835 |
| NOBDUFo     |                                      | 0.23058 | 0.99871 |
| NOKGAXo     |                                      | 0.09112 | 0.99906 |
| NORGES01o   |                                      | 0.02757 | 0.99994 |
| NUJDAX_wo   |                                      | 0.10144 | 0.9988  |
| NUPQEWo     |                                      | 0.08552 | 0.9997  |
| NUYHUKo     |                                      | 0.04418 | 0.99988 |
| OBEQAN01o   |                                      | 0.06784 | 0.9997  |
| OCAHACo     |                                      | 0.06806 | 0.99971 |
| OFAZUQo     |                                      | 0.17568 | 0.99792 |
| OFEJOAo     |                                      | 0.03568 | 0.99989 |
| OFIEWo      |                                      | 0.05666 | 0.99982 |
| OGIXINo     |                                      | 0.01673 | 0.99991 |
| OPOGADo     |                                      | 0.02419 | 0.99995 |
| OPOQERo     |                                      | 0.02804 | 0.99992 |
| ORNHCL12o   |                                      | 0.06706 | 0.99916 |
| OROZAXo     |                                      | 0.08453 | 0.99938 |

|             |                      |         |         |
|-------------|----------------------|---------|---------|
| OXYTET01_ho |                      | 0.12604 | 0.99881 |
| PABHIJ01o   |                      | 0.06994 | 0.9994  |
| PAJNUJo     |                      | 0.04815 | 0.9998  |
| PANCURo     |                      | 0.11263 | 0.99954 |
| PBUMSLo     |                      | 0.20896 | 0.99732 |
| PBUMSL_ho   |                      | 0.20896 | 0.99732 |
| PCLPMS_1o   |                      | 0.28432 | 0.99551 |
| PCLPMS_2o   |                      | 0.16634 | 0.99848 |
| PEBGUC02o   |                      | 0.105   | 0.99895 |
| PEDWOMo     |                      | 0.109   | 0.99939 |
| PEKFANo     |                      | 0.10696 | 0.99897 |
| PERPAZo     |                      | 0.08545 | 0.9996  |
| PETHIDo     |                      | 0.06759 | 0.99946 |
| PETHID_ho   |                      | 0.06759 | 0.99946 |
| PEXKOS01o   | 0.0552 wo Cl-ion, OK |         | n/a     |
| PEYGOQo     |                      | 0.11195 | 0.99883 |
| PGDEDOo     |                      | 0.03546 | 0.9999  |
| PHEPHRo     |                      | 0.05242 | 0.99962 |
| PICVUU01o   |                      | 0.10304 | 0.99959 |
| PIGSOOo     |                      | 0.0394  | 0.99984 |
| PILOCP01o   |                      | 0.21653 | 0.9943  |
| PIMKOLo     |                      | 0.05709 | 0.99963 |
| PIMOZDo     |                      | 0.19124 | 0.99879 |
| PINDONo     |                      | 0.05678 | 0.99963 |
| PIPAMPo     |                      | 0.13724 | 0.99935 |
| PIPCIL_ho   |                      | 0.55519 | 0.98834 |
| PIRENA10_wo |                      | 0.07397 | 0.99962 |
| PIWLEM02o   |                      | 0.04117 | 0.9999  |
| PMEPEN01o   |                      | 0.06593 | 0.99971 |
| POBKOGo     |                      | 0.11535 | 0.99945 |
| POGKOMo     |                      | 0.17417 | 0.99936 |
| PRAZAM_ho   |                      | 0.10019 | 0.99901 |
| PRGDOL02o   |                      | 0.04603 | 0.99985 |
| PROCPHo     |                      | 0.10914 | 0.99901 |
| PROGLE20_ho |                      | 0.36106 | 0.9923  |
| PROGST12o   |                      | 0.05848 | 0.99974 |
| PUFGUJo     |                      | 0.10077 | 0.99899 |
| PUQGUFo     | 0.0778 wo K-ion, OK  |         | n/a     |
| PUVMAUo     |                      | 0.06904 | 0.99902 |
| PUVRIHo     |                      | 0.05053 | 0.99974 |
| PYRXCL01o   |                      | 0.0443  | 0.99964 |
| PYRZIN23o   |                      | 0.02084 | 0.99989 |
| QABCIIo     |                      | 0.13095 | 0.9995  |
| QABTOD01o   |                      | 0.04561 | 0.9999  |
| QATNEF01o   |                      | 0.09152 | 0.99963 |
| QECHOV03o   |                      | 0.02692 | 0.99981 |
| QEMLIEo     |                      | 0.08323 | 0.99964 |
| QETZULo     |                      | 0.16113 | 0.99813 |
| QICMEU_ho   |                      | 1.3643  | 0.91064 |
| QIFKEX01o   |                      | 0.28505 | 0.99635 |



|             |         |         |
|-------------|---------|---------|
| QIJPACo     | 0.11878 | 0.99904 |
| QIJZOYo     | 0.07371 | 0.99977 |
| QIQKEIo     | 0.06937 | 0.99966 |
| QIQLILo     | 0.14224 | 0.99728 |
| QOMKUAo     | 0.13853 | 0.99918 |
| QQQAEJ02o   | 0.12456 | 0.99753 |
| QQQAUG04o   | 0.17424 | 0.99649 |
| QQQBSS01_ho | 0.18443 | 0.9971  |
| QUBQIO01o   | 0.04653 | 0.99979 |
| QURWOQ02o   | 0.07866 | 0.99916 |
| QUZWOYo     | 0.14467 | 0.99846 |
| RALMIAo     | 0.11174 | 0.99918 |
| RALMOG01o   | 0.09553 | 0.99944 |
| RAVPUBo     | 0.11706 | 0.99963 |
| RBFLAV10_ho | 0.05375 | 0.99979 |
| REBCILo     | 0.06858 | 0.99984 |
| REDNIXo     | 0.02118 | 0.99997 |
| REZBILo     | 0.07094 | 0.99952 |
| RIGDESo     | 0.05105 | 0.9997  |
| RILQOUo     | 0.12598 | 0.99853 |
| RINTITo     | 0.05982 | 0.99986 |
| RIQFOOo     | 0.02523 | 0.99988 |
| RIWKOXo     | 0.05359 | 0.99966 |
| ROKNUBo     | 0.115   | 0.99955 |
| ROQLOAo     | 0.02756 | 0.99994 |
| RSERPNO1o   | 0.06414 | 0.99988 |
| RUKBOPo     | 0.04324 | 0.9998  |
| RUKQOFo     | 0.06983 | 0.99977 |
| RUTGOEo     | 0.10642 | 0.99846 |
| RUTGUKo     | 0.13208 | 0.99574 |
| RUWBAMo     | 0.11541 | 0.99934 |
| RUYZAOo     | 0.14751 | 0.99765 |
| SAFNIWo     | 0.18995 | 0.99778 |
| SAHSOJ_ho   | 0.0844  | 0.9995  |
| SAJFITo     | 0.07058 | 0.9997  |
| SAJNOG_ho   | 0.12709 | 0.99927 |
| SAQYIRo     | 0.11339 | 0.99948 |
| SATHOLo     | 0.08193 | 0.99944 |
| SAWFIF_ho   | 0.15208 | 0.99892 |
| SAXFEDo     | 0.1566  | 0.99931 |
| SAXQITo     | 0.09258 | 0.99911 |
| SAZLAGo     | 0.07774 | 0.99948 |
| SAZNOW_mo   | 1.04061 | 0.94459 |
| SEBPEU01o   | 0.07161 | 0.99924 |
| SENJIFo     | 0.11156 | 0.99932 |
| SEQKAA02o   | 0.08854 | 0.99922 |
| SEQNILo     | 0.08365 | 0.99974 |
| SESKUY01o   | 0.10766 | 0.99919 |
| SETSOAo     | 0.10801 | 0.99885 |
| SFDMOX05_ho | 0.07209 | 0.99954 |

|             |                                        |         |         |
|-------------|----------------------------------------|---------|---------|
| SIFGODo     |                                        | 0.04594 | 0.99988 |
| SIJWUFo     |                                        | 0.02562 | 0.99982 |
| SIKLIH07o   |                                        | 0.06758 | 0.99951 |
| SIWCEG_1o   |                                        | 0.58071 | 0.98471 |
| SIWCEG_2o   | 2 <sup>nd</sup> disorder component, OK |         | n/a     |
| SLFNMB02o   |                                        | 0.07372 | 0.99938 |
| SLFNMC20_ho |                                        | 0.4365  | 0.98495 |
| SLFNMG01o   |                                        | 0.05218 | 0.99961 |
| SOBBUG_ho   |                                        | 0.09966 | 0.99864 |
| SONKEMo     |                                        | 0.07659 | 0.99973 |
| SOPSEVo     |                                        | 0.12329 | 0.99735 |
| SOYMID_1o   |                                        | 0.12783 | 0.99931 |
| SOYMID_2o   |                                        | 0.12481 | 0.99934 |
| SUTHAZ37o   |                                        | 0.09876 | 0.99887 |
| SUTWIOo     |                                        | 0.16617 | 0.99835 |
| SUVGULo     |                                        | 0.07814 | 0.99964 |
| SUWNUTo     |                                        | 0.04281 | 0.99978 |
| TADLIU02o   |                                        | 0.06383 | 0.99979 |
| TAJFOZ_ho   |                                        | 0.15295 | 0.99876 |
| TANDETo     |                                        | 0.06101 | 0.9991  |
| TAYFUV_ho   |                                        | 0.17324 | 0.99783 |
| TAZZUPo     |                                        | 0.06631 | 0.99955 |
| TEPSAM_ho   |                                        | 0.05485 | 0.9994  |
| TESTON10o   |                                        | 0.01998 | 0.99996 |
| TETCYH12o   |                                        | 0.65366 | 0.97227 |
| TEZZEEo     |                                        | 0.05745 | 0.99973 |
| TFPROM10o   |                                        | 0.11861 | 0.99898 |
| THCLCS_ho   |                                        | 0.27221 | 0.99678 |
| THGUAN10o   |                                        | 0.03158 | 0.99978 |
| TIJMIIo     |                                        | 0.08151 | 0.99919 |
| TIPWAQ_ho   |                                        | 0.29034 | 0.99419 |
| TITHYN10_ho |                                        | 0.09802 | 0.99944 |
| TIYQAU01o   |                                        | 0.08499 | 0.99966 |
| TMPHCL01o   |                                        | 0.09478 | 0.99928 |
| TOPXED_mo   |                                        | 0.11378 | 0.99893 |
| TOXXIN_ho   |                                        | 0.2012  | 0.99729 |
| TOYJOGo     |                                        | 0.16045 | 0.99874 |
| TOYSUXo     |                                        | 0.30231 | 0.99469 |
| TUBOBM_ho   |                                        | 0.30468 | 0.9957  |
| TULRIB_mo   | 0.0138 for main molecule, OK           |         | n/a     |
| TUQGETo     |                                        | 0.30116 | 0.98274 |
| TUTDODo     |                                        | 0.06265 | 0.99971 |
| TUZCOIo     |                                        | 0.05442 | 0.99976 |
| UCUVETo     |                                        | 0.07066 | 0.9996  |
| UGIYEPo     |                                        | 0.07854 | 0.99971 |
| UHUQUKo     |                                        | 0.0986  | 0.9997  |
| UKAKIAo     |                                        | 0.10855 | 0.99912 |
| UMOMALo     |                                        | 0.06128 | 0.99982 |
| UPUKOHo     |                                        | 0.08006 | 0.99923 |
| UQAPEJo     |                                        | 0.09666 | 0.9995  |

|             |                                                      |         |         |
|-------------|------------------------------------------------------|---------|---------|
| URAVUGo     |                                                      | 0.11861 | 0.99939 |
| UREAOH12o   |                                                      | 0.04305 | 0.99903 |
| USOCOVo     |                                                      | 0.12698 | 0.99947 |
| UXIXUVo     |                                                      | 0.04642 | 0.99966 |
| VAMBOA01o   |                                                      | 0.1859  | 0.99881 |
| VAWPITo     |                                                      | 0.102   | 0.99851 |
| VAWQEQo     |                                                      | 0.07488 | 0.99957 |
| VAYJOWo     |                                                      | 0.2376  | 0.99689 |
| VAYXOIo     |                                                      | 0.1061  | 0.99945 |
| VEMRAIo     |                                                      | 0.10869 | 0.99951 |
| VEVQAQo     |                                                      | 0.08667 | 0.99955 |
| VICXOVo     |                                                      | 0.1236  | 0.99919 |
| VIDJEX01o   |                                                      | 0.15361 | 0.99784 |
| VIFQILo     |                                                      | 0.10361 | 0.99928 |
| VIGDAR_1o   |                                                      | 0.22684 | 0.99679 |
| VIGDAR_2o   |                                                      | 0.23294 | 0.99662 |
| VOGCAV_ho   |                                                      | 0.08841 | 0.99982 |
| VOXDUHo     |                                                      | 0.13282 | 0.99819 |
| VUCDUSo     |                                                      | 0.24421 | 0.99307 |
| VUCJElO     |                                                      | 0.11824 | 0.99928 |
| VUJRUE_ho   |                                                      | 0.05639 | 0.99989 |
| VUXPUZo     |                                                      | 0.09748 | 0.99861 |
| WACHIR_ho   |                                                      | 0.08044 | 0.99977 |
| WADPICo     |                                                      | 0.0886  | 0.99954 |
| WADTIGo     |                                                      | 0.06208 | 0.99981 |
| WAHJARo     |                                                      | 0.10273 | 0.99955 |
| WAJYUCo     |                                                      | 0.11277 | 0.99959 |
| WALPIJo     |                                                      | 0.10863 | 0.99899 |
| WASGAA_ho   |                                                      | 0.08781 | 0.99945 |
| WAWVOHo     |                                                      | 0.10572 | 0.99955 |
| WEHYEOo     |                                                      | 0.08654 | 0.99942 |
| WELGAVo     |                                                      | 0.08137 | 0.99968 |
| WEMGECo     |                                                      | 0.05612 | 0.99951 |
| WEQHEF01_ho |                                                      | 0.67036 | 0.96789 |
| WERVEU02o   |                                                      | 0.093   | 0.99923 |
| WETLOYo     |                                                      | 0.08313 | 0.99949 |
| WETPOB_1o   | 0.054, disordered, OK                                |         | n/a     |
| WETPOB_2o   | 0.082, disordered, OK                                |         | n/a     |
| WEXQAS01o   |                                                      | 0.07044 | 0.99958 |
| WEZCOTo     |                                                      | 0.07175 | 0.99956 |
| WIBZEMo     |                                                      | 0.1187  | 0.99944 |
| WINJAE_mo   | 0.0284, shifted due to cation, OK                    |         | n/a     |
| WINWUL02o   |                                                      | 0.08977 | 0.99933 |
| WIPYOLo     |                                                      | 0.10867 | 0.99904 |
| WOQDAHo     |                                                      | 0.07312 | 0.99947 |
| WOYPABo     |                                                      | 0.07603 | 0.99967 |
| WUTHEA01o   | Moved molecules in unit cell, higher Z structure, OK |         | n/a     |
| XANTOX_ho   |                                                      | 0.18893 | 0.99512 |
| XAPTAK01o   |                                                      | 0.03314 | 0.99986 |
| XAQNOUo     |                                                      | 0.09623 | 0.99885 |

|             |           |         |         |
|-------------|-----------|---------|---------|
| XATJAFo     |           | 0.08216 | 0.99953 |
| XAYGEJ01o   |           | 0.11048 | 0.99911 |
| XAZRUNo     |           | 0.10032 | 0.99901 |
| XEJKUSo     |           | 0.07451 | 0.99888 |
| XEZTON01o   |           | 0.09007 | 0.99943 |
| XICRUYo     |           | 0.12032 | 0.99851 |
| XIJKIK01o   |           | 0.04537 | 0.99898 |
| XIRHOXo     |           | 0.13245 | 0.99699 |
| XOCXUI01o   |           | 0.06183 | 0.99972 |
| XOGMOXo     |           | 0.14906 | 0.99565 |
| XOJNOBo     |           | 0.13887 | 0.99889 |
| XOSGUHo     |           | 0.07944 | 0.99978 |
| XOZRUZo     |           | 0.24582 | 0.99525 |
| XULRUTo     |           | 0.06772 | 0.99975 |
| YACGUE_ho   |           | 0.32192 | 0.99121 |
| YACHAL_ho   |           | 0.09409 | 0.99937 |
| YACTEC01o   |           | 0.06532 | 0.99944 |
| YALWISo     |           | 0.04813 | 0.99989 |
| YALYUHo     |           | 0.0736  | 0.99963 |
| YAPZEUo     |           | 0.03839 | 0.99989 |
| YARXEWo     |           | 0.05939 | 0.99986 |
| YIGRAIo     |           | 0.06347 | 0.99961 |
| YIKNUDo     |           | 0.11619 | 0.99887 |
| YODXARo     |           | 0.13084 | 0.99879 |
| YOKQAQo     |           | 0.0937  | 0.99852 |
| YUKVADo     |           | 0.04393 | 0.99989 |
| YURSUB_ho   |           | 0.12828 | 0.99937 |
| ZAPLEJo     |           | 0.11601 | 0.9995  |
| ZAPXOFo     |           | 0.16955 | 0.99574 |
| ZEMJOQo     |           | 0.05147 | 0.99984 |
| ZENREPo     |           | 0.15334 | 0.99939 |
| ZIDLEDo     |           | 0.07708 | 0.99964 |
| ZIKJOSo     |           | 0.0599  | 0.99949 |
| ZIMBOOo     |           | 0.077   | 0.99857 |
| ZIVKEUo     |           | 0.09763 | 0.99907 |
| ZOGSODo     |           | 0.22119 | 0.99727 |
| ZOXSEKo     |           | 0.1117  | 0.99914 |
| ZUHFIRo     |           | 0.08305 | 0.99935 |
| ZUQMIJ_ho   | 0.105, OK |         | n/a     |
| ZZPUS19o    |           | 0.14205 | 0.99801 |
| ZZRRCG01_ho |           | 0.09679 | 0.99942 |
| ZZTSE03o    |           | 0.04035 | 0.9998  |

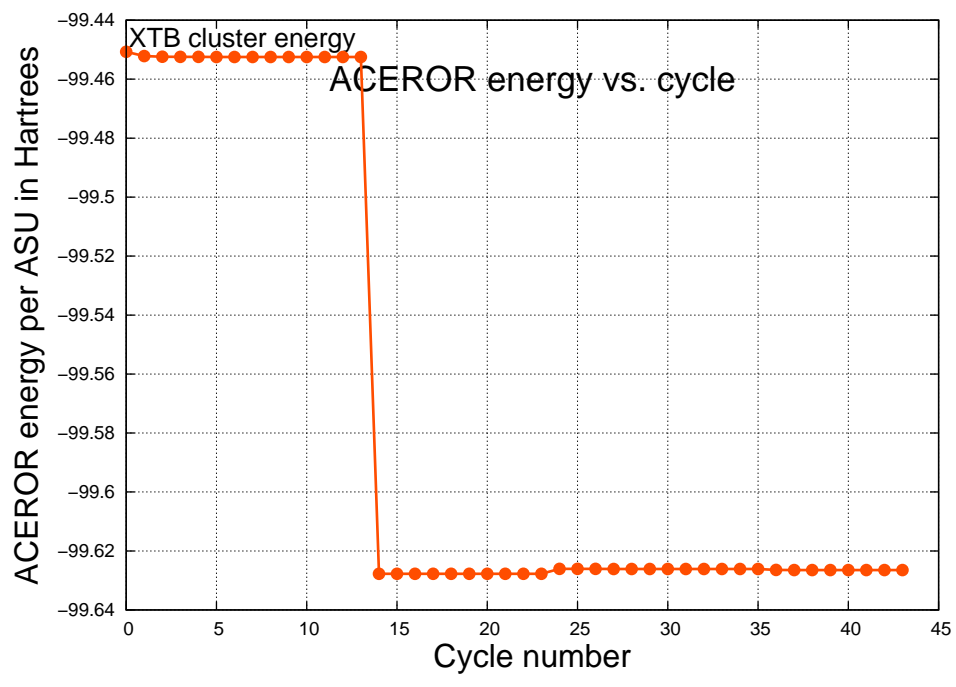

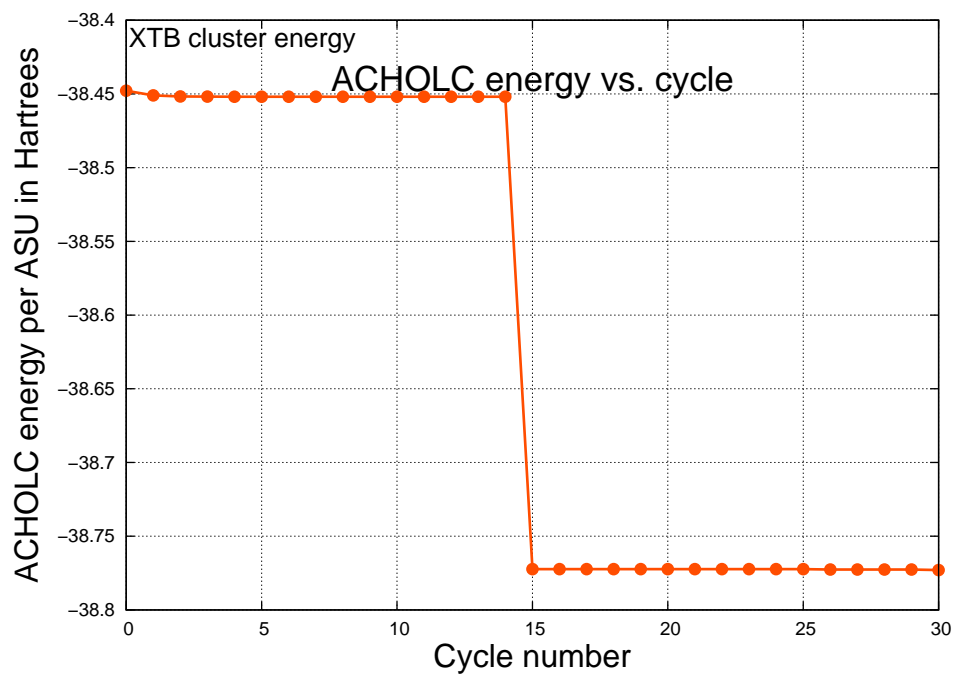

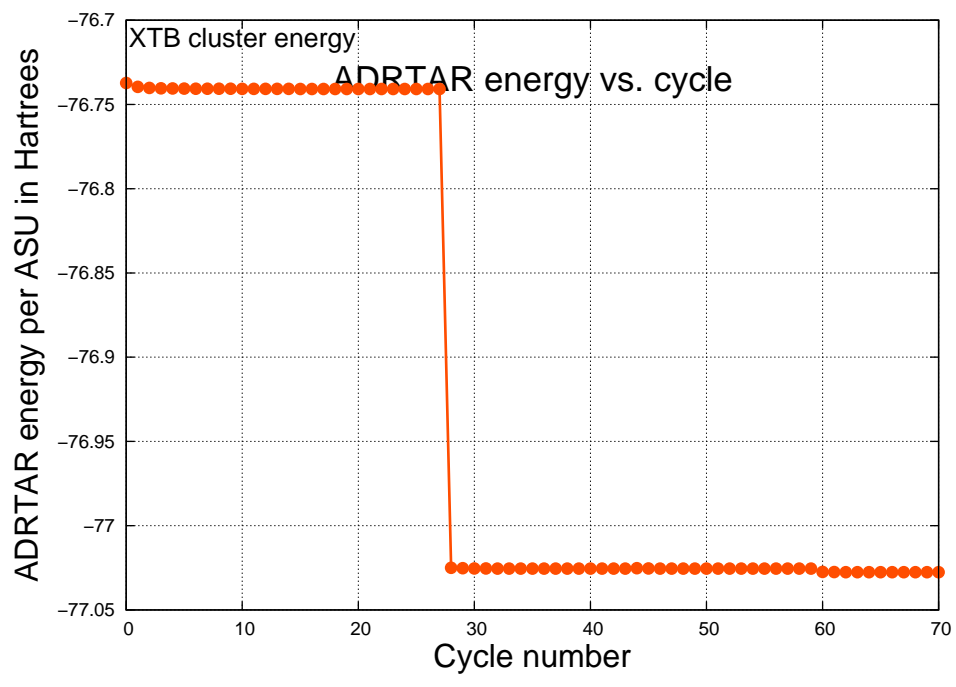

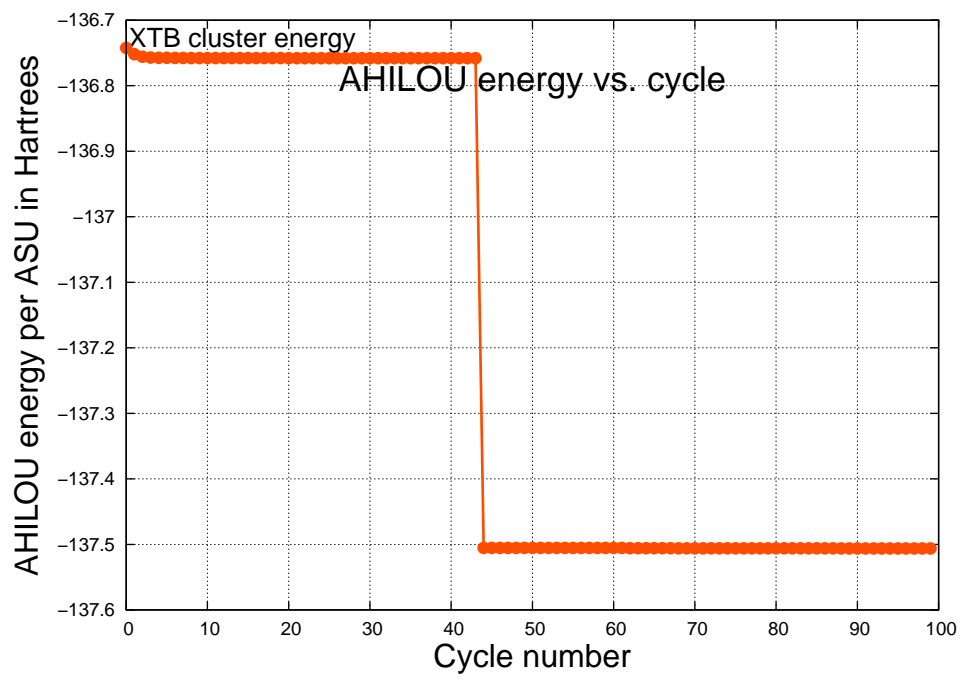



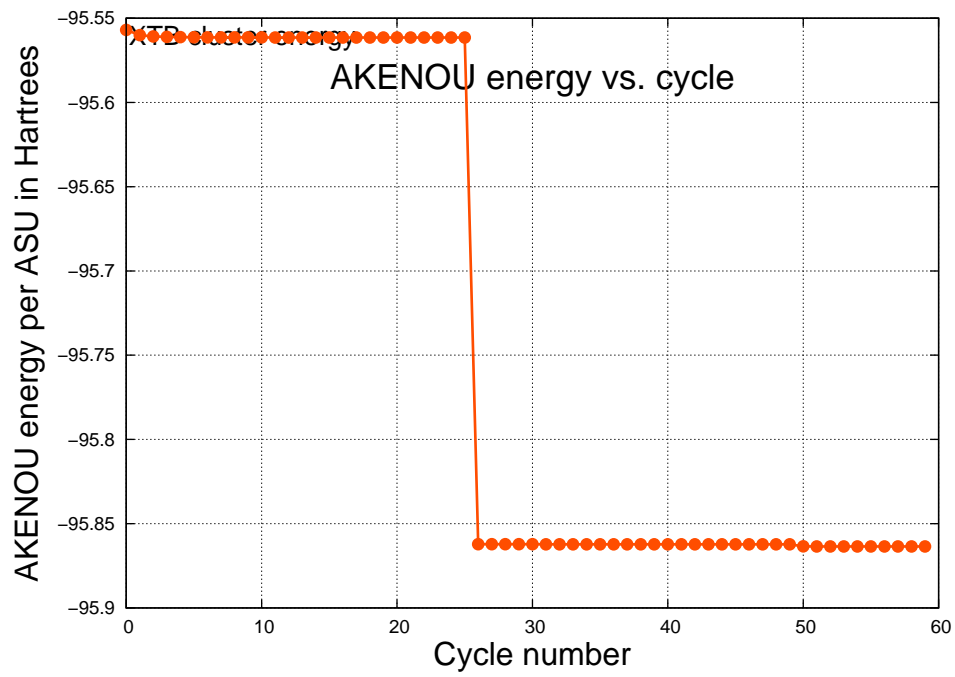

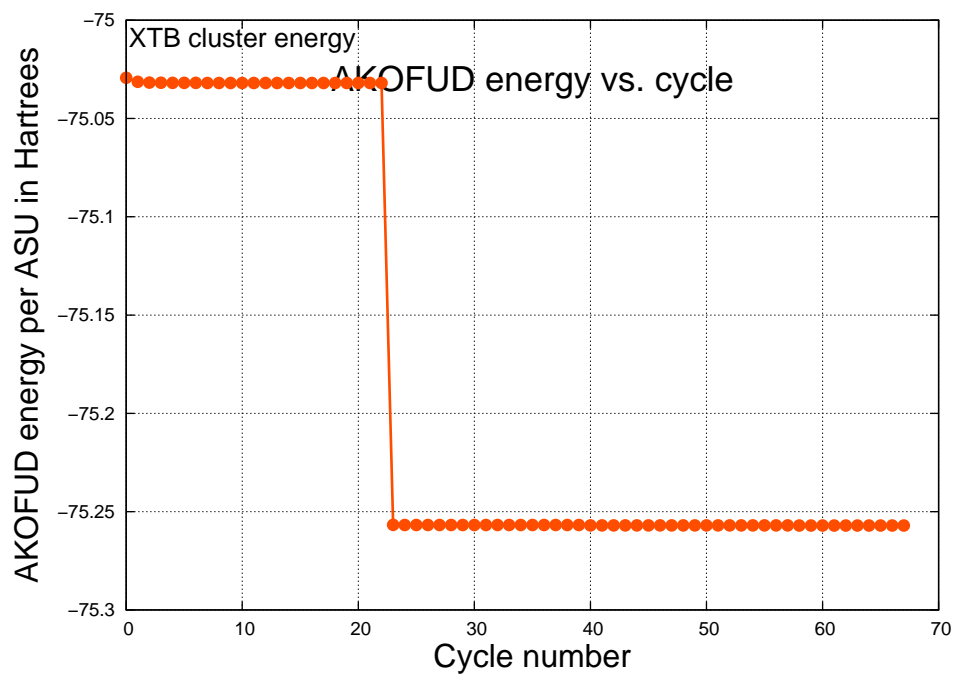

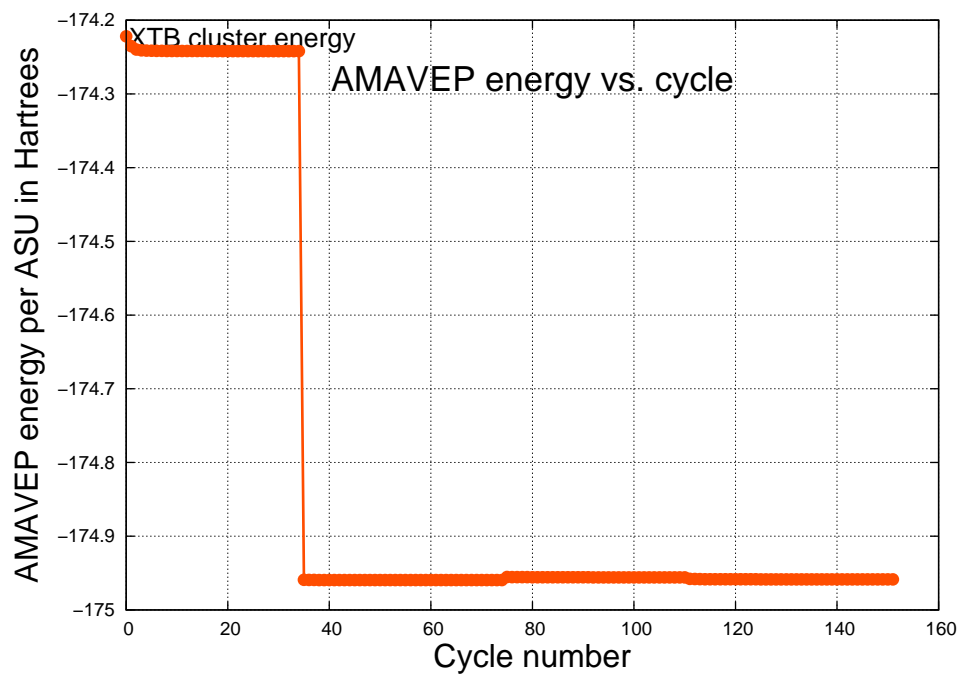

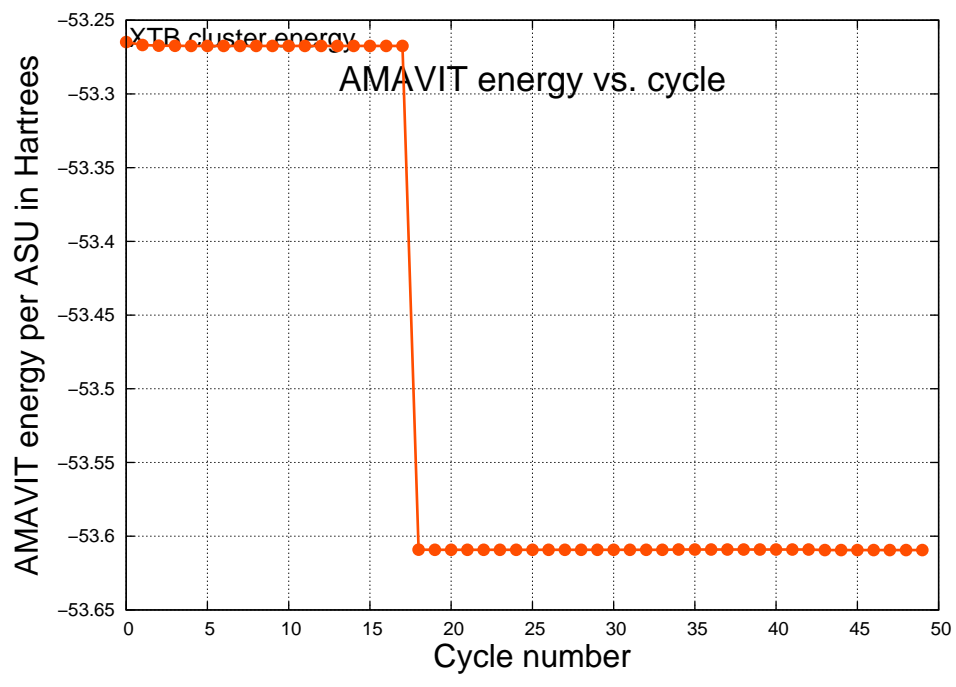

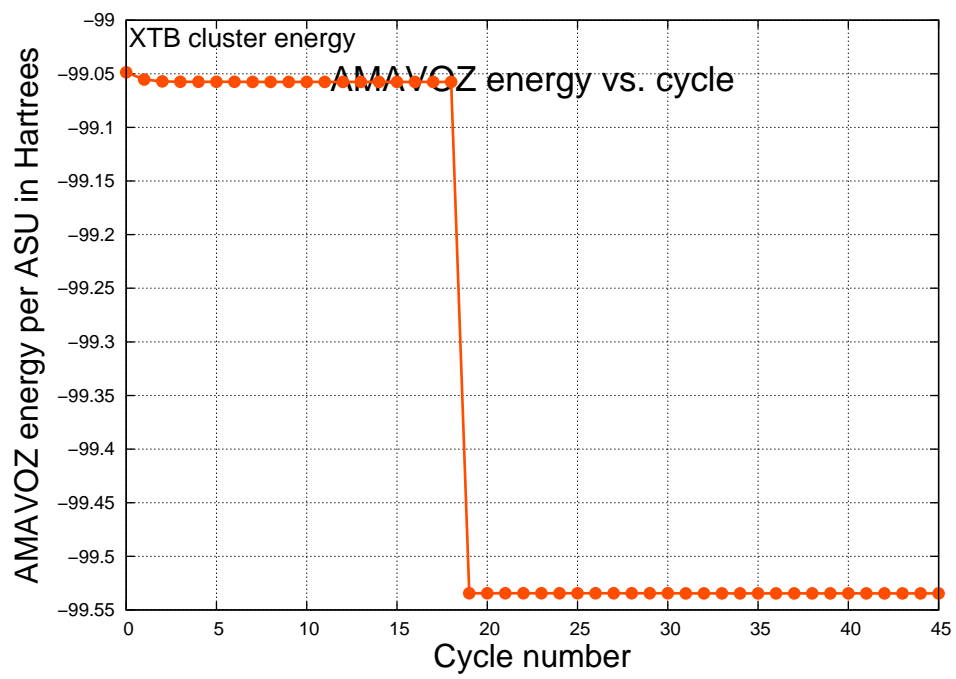

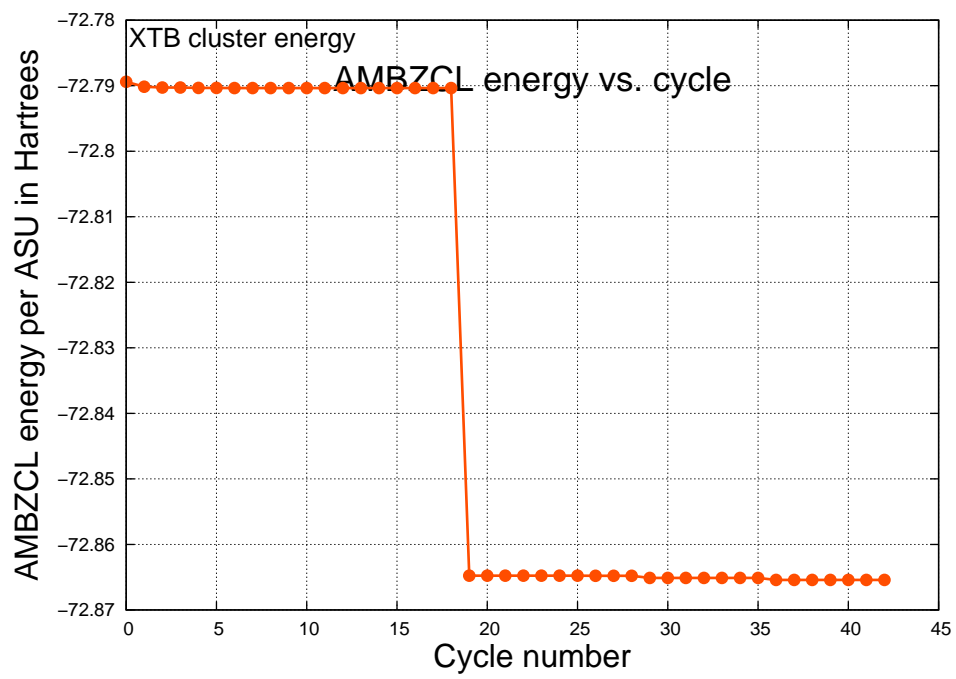

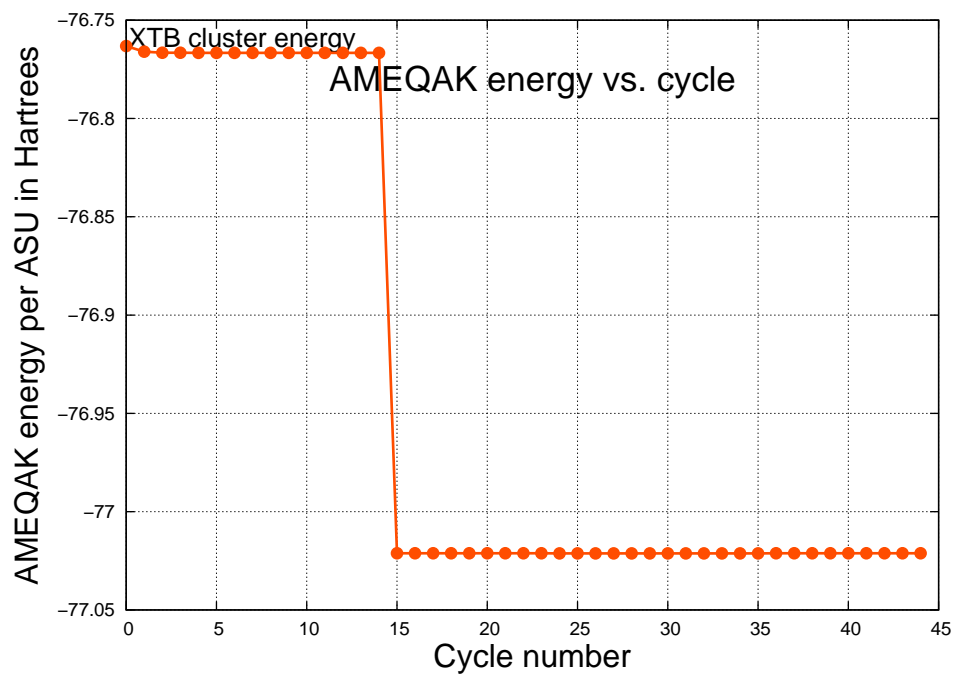

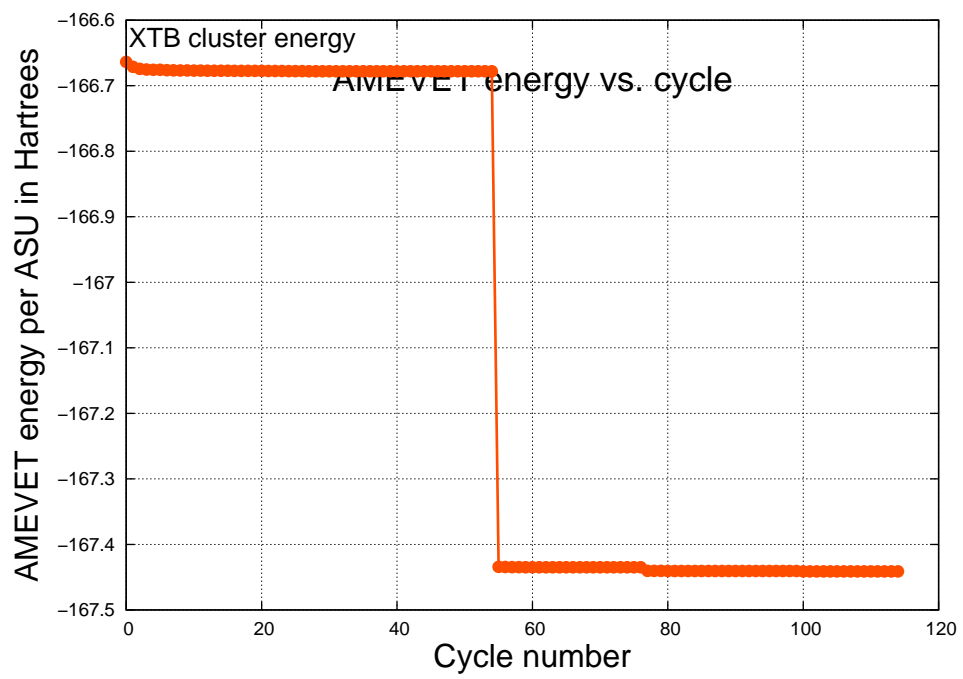



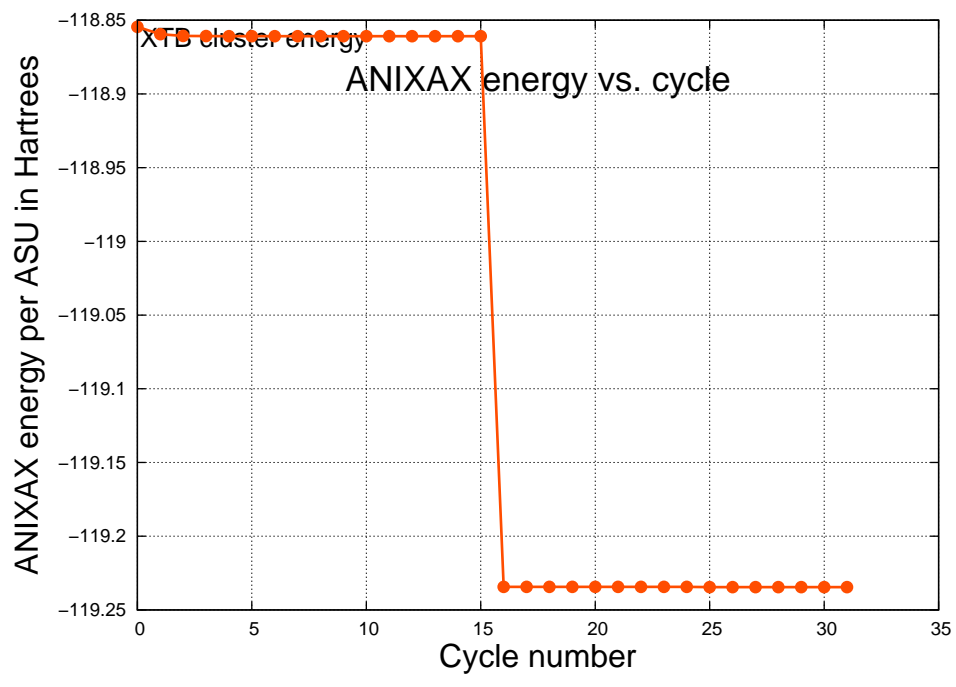

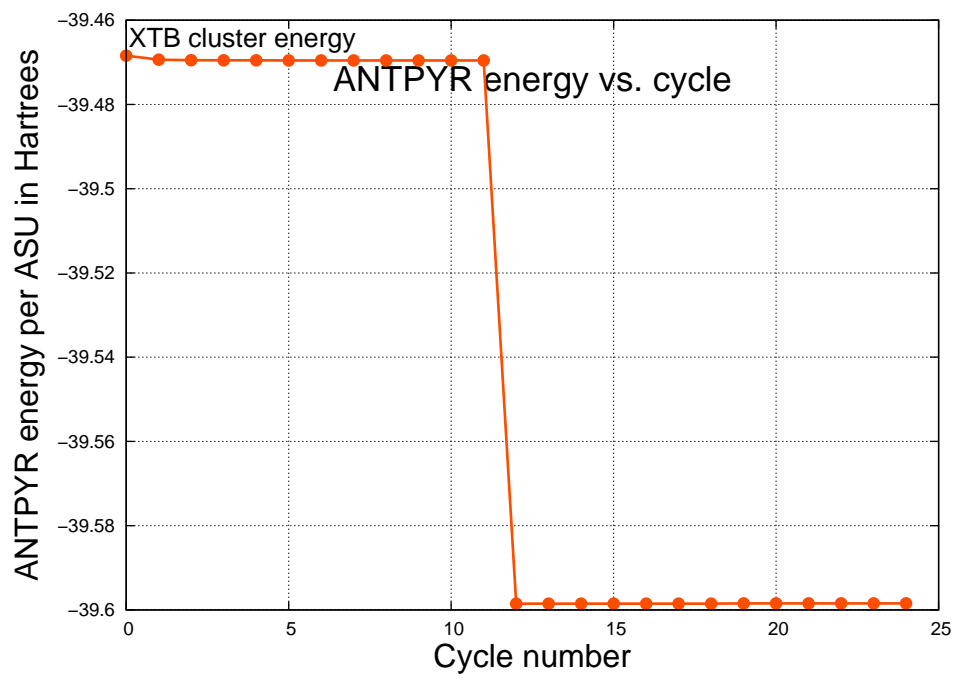

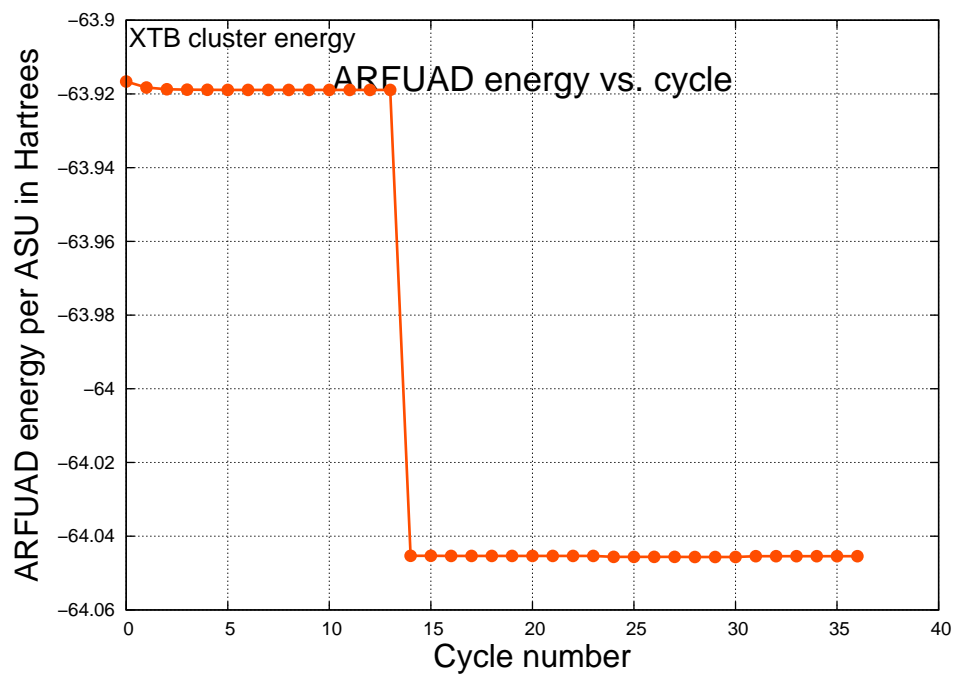

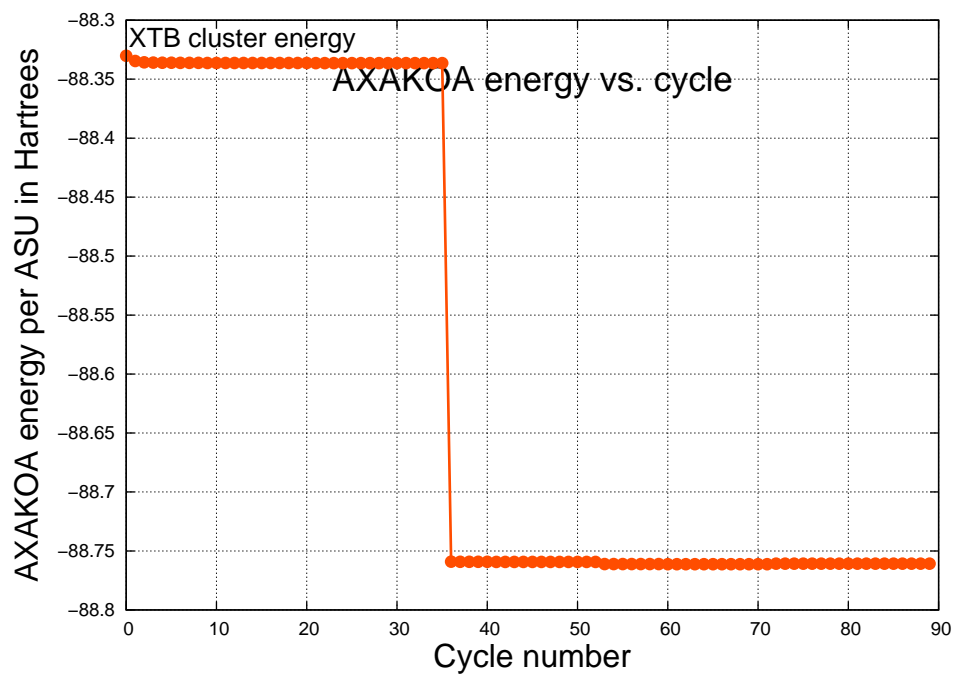

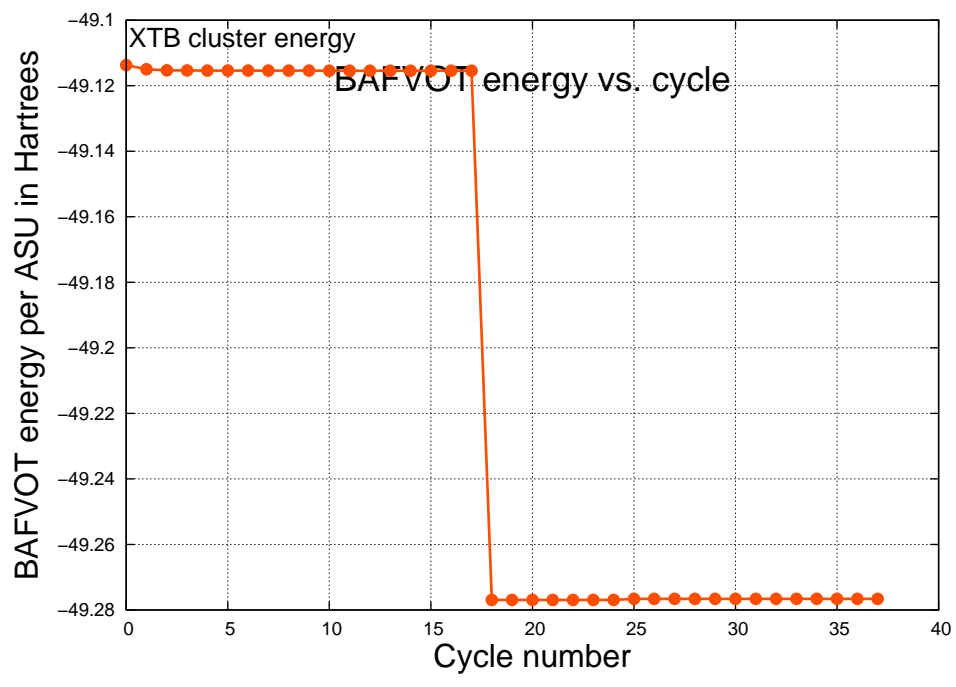

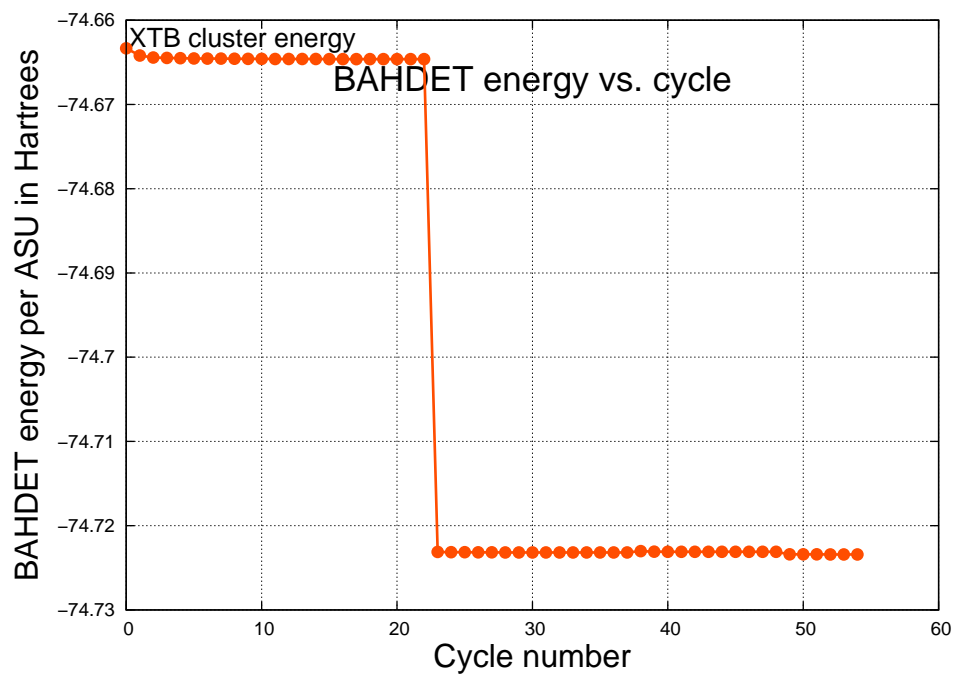

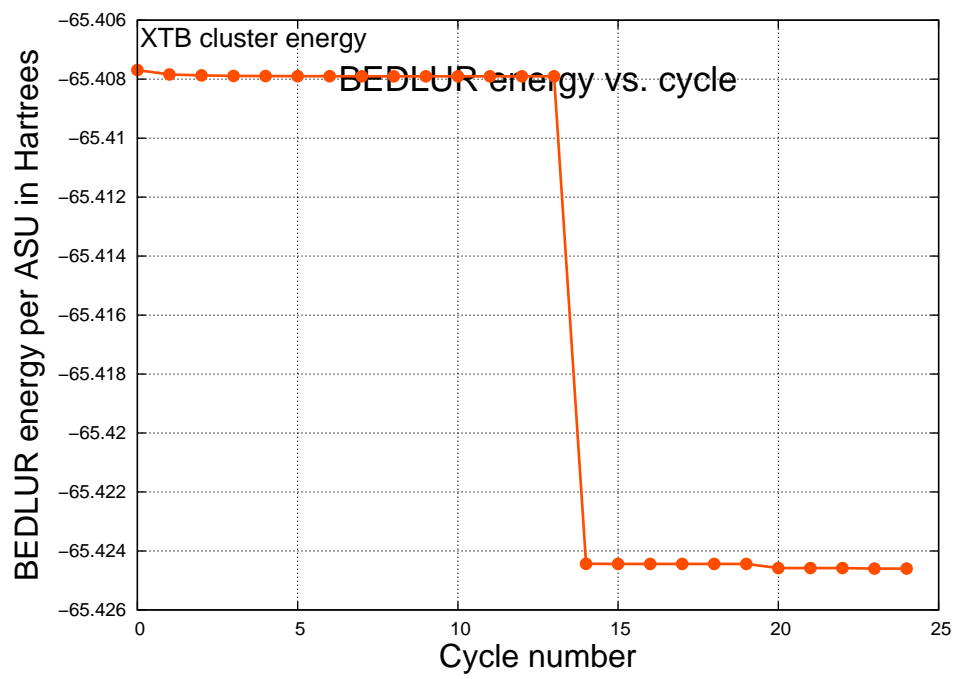

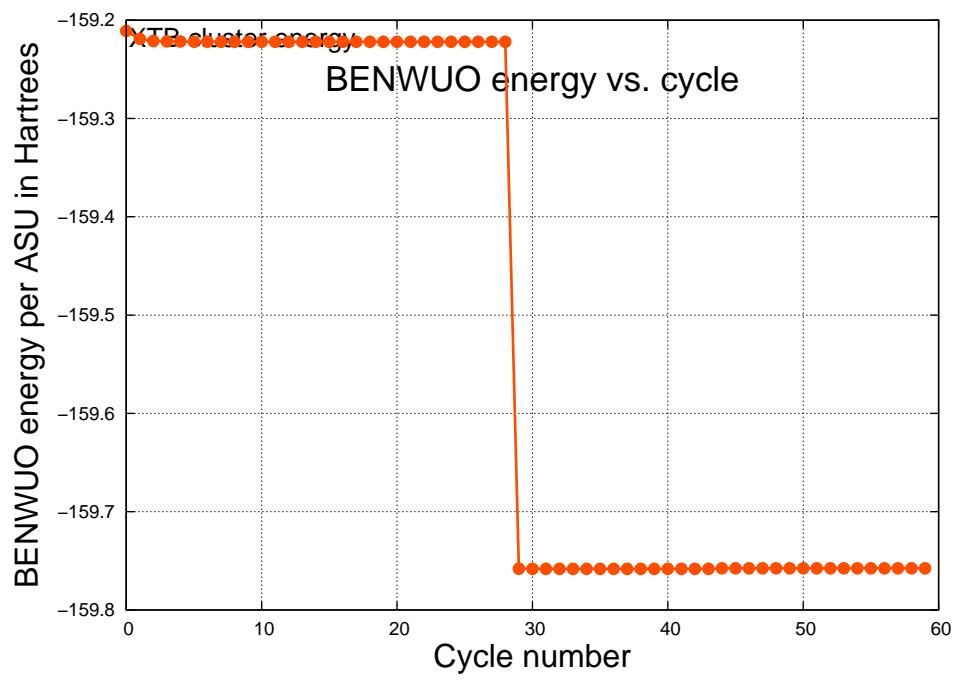



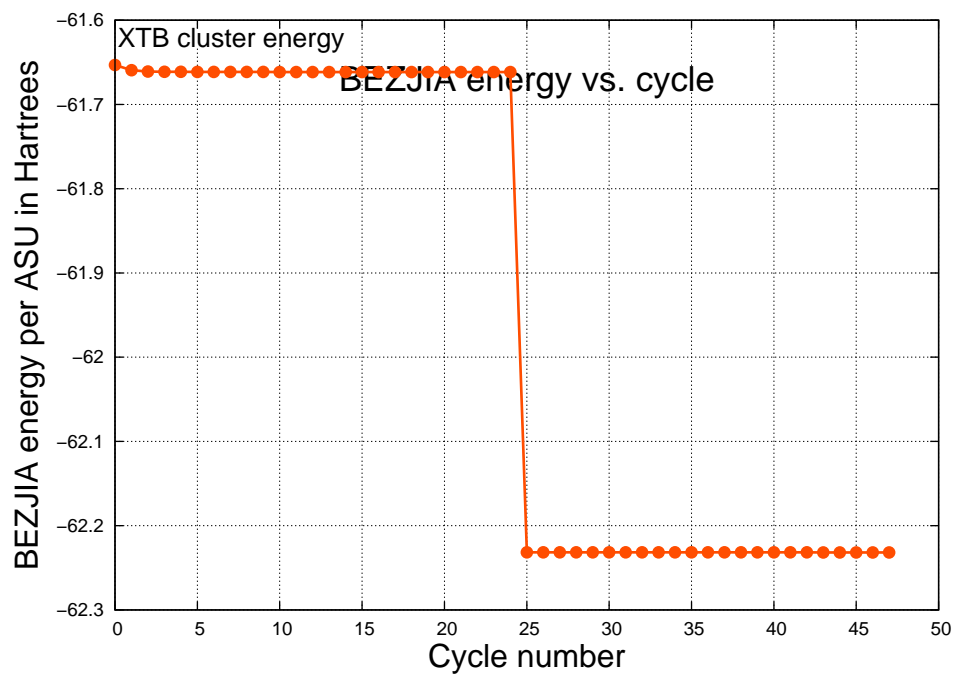

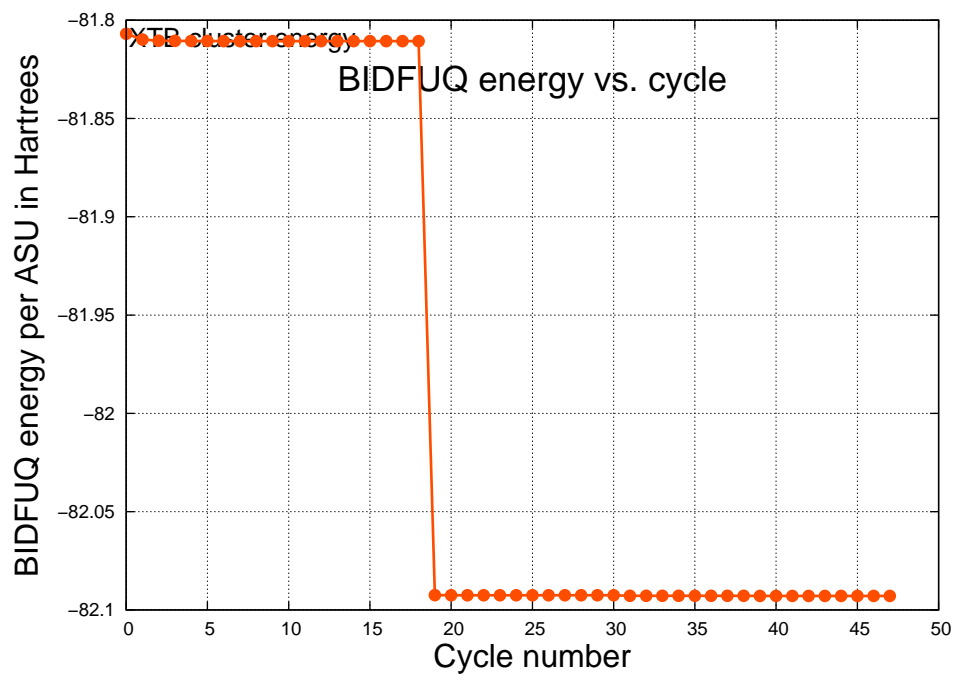

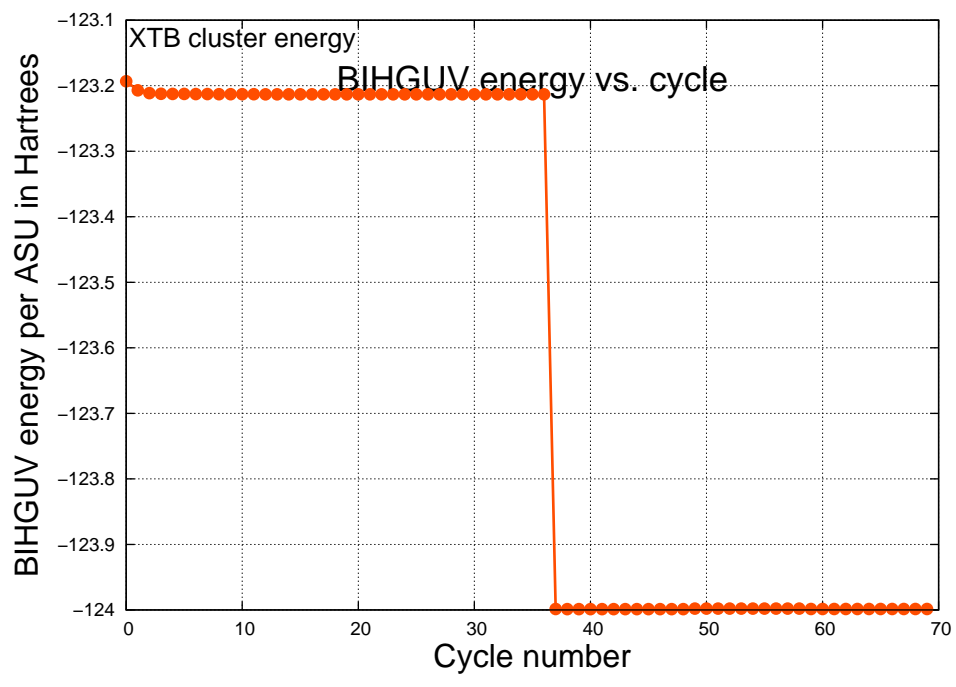

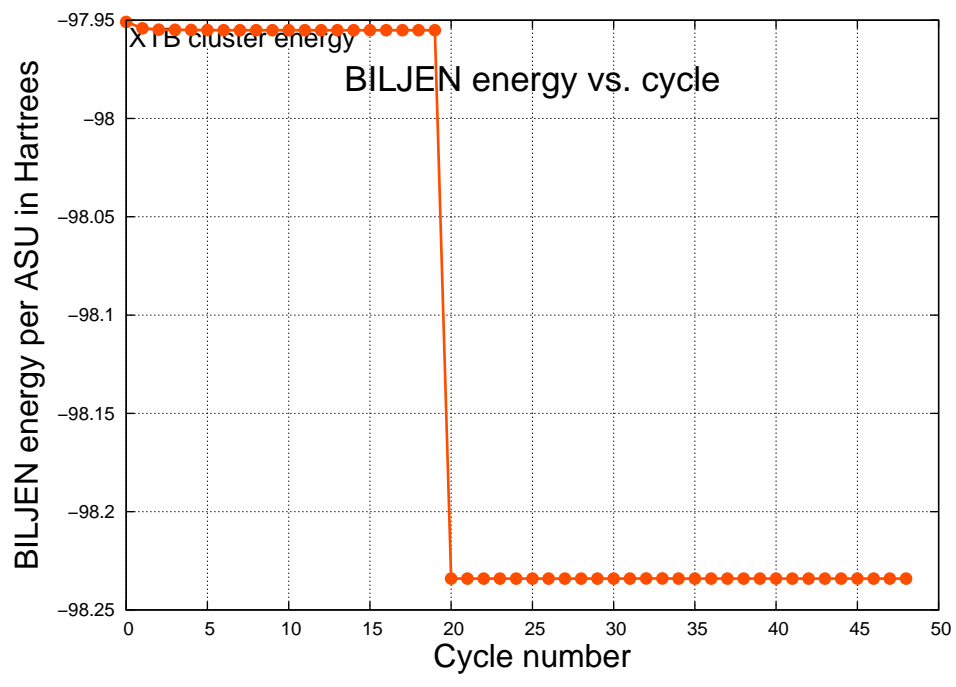

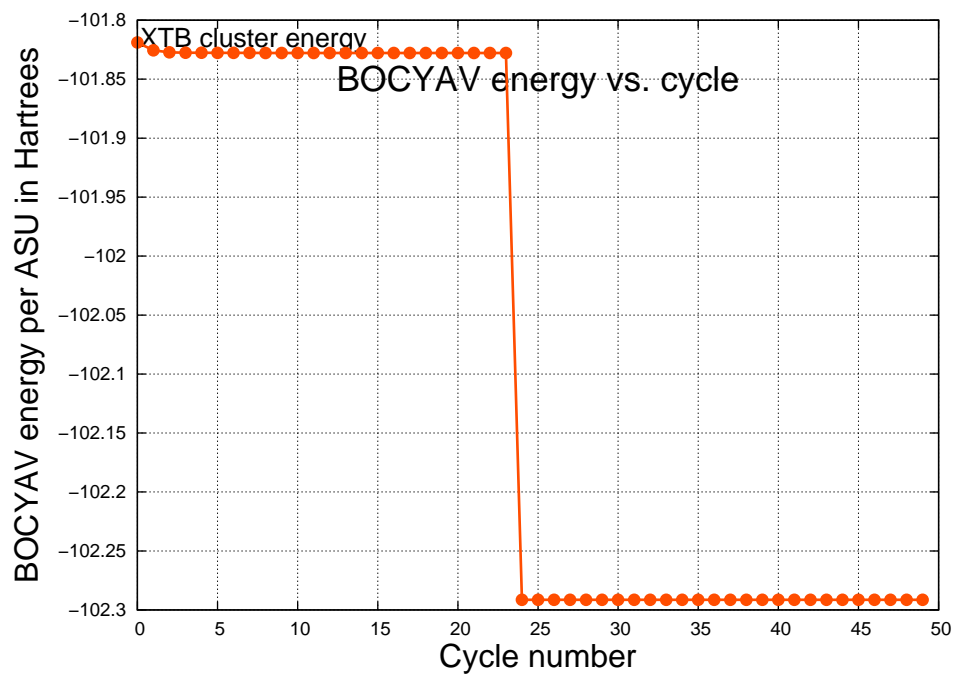

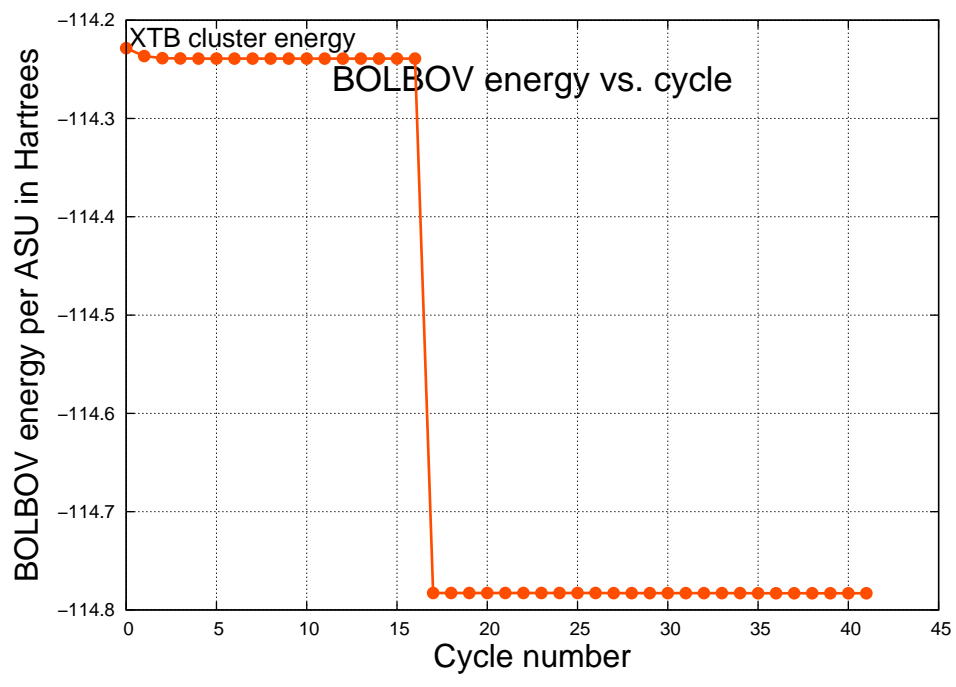

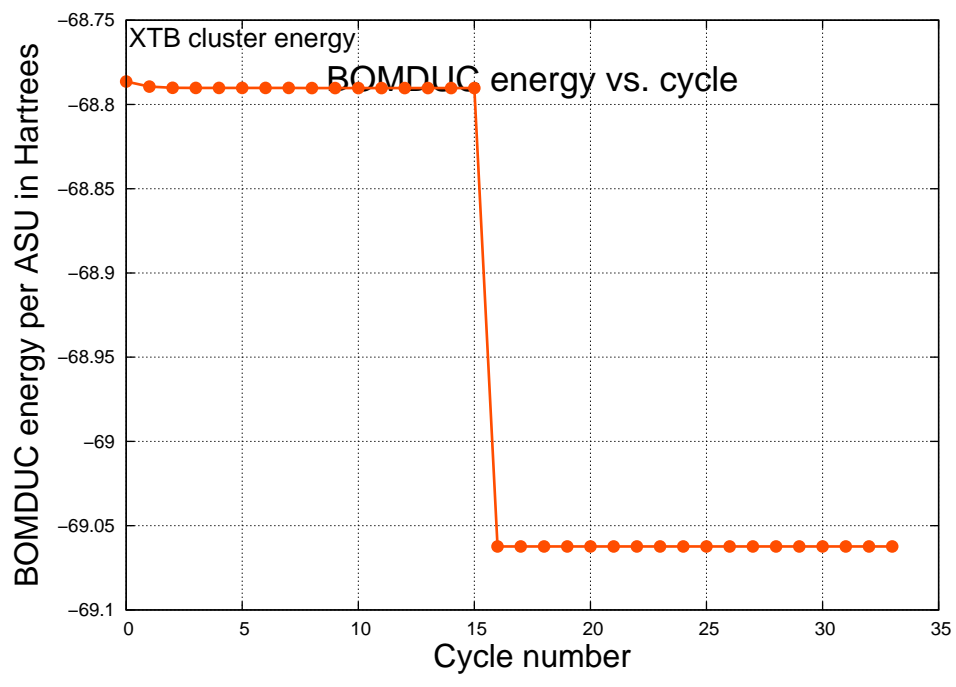

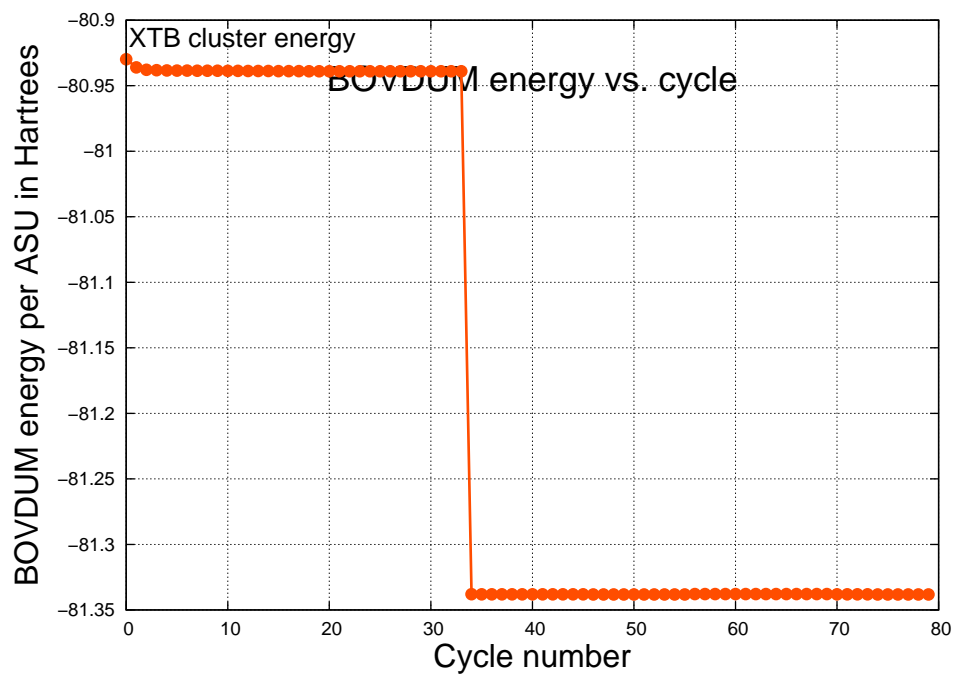



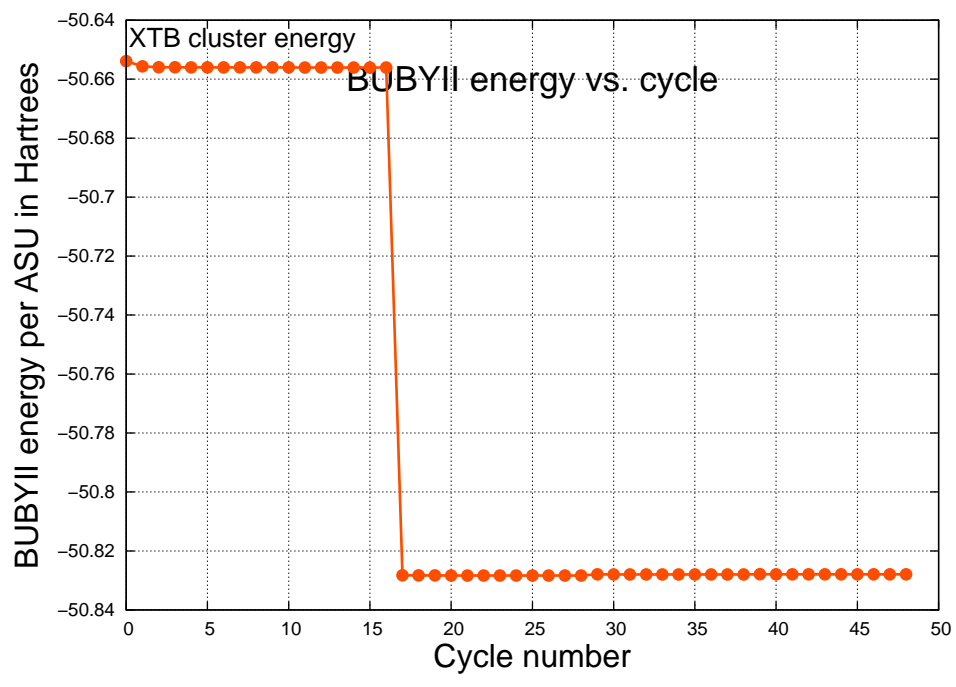

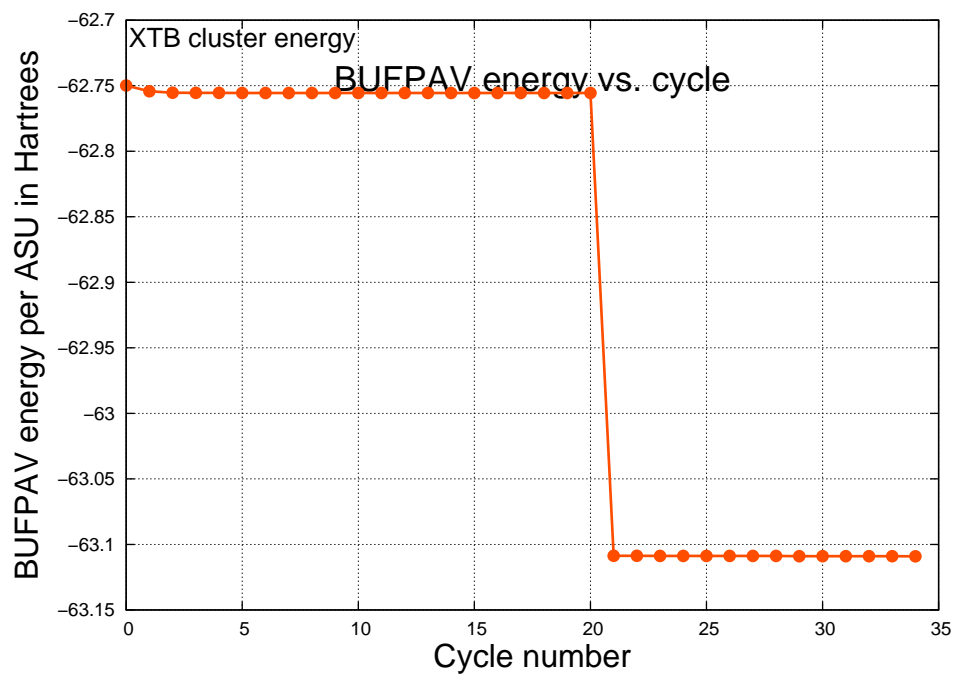

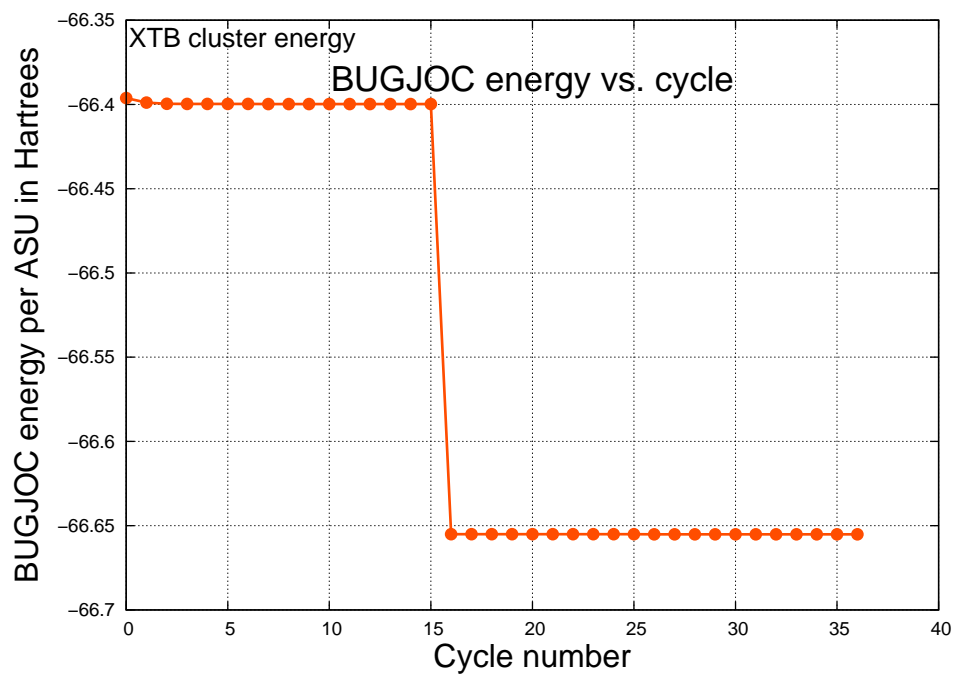

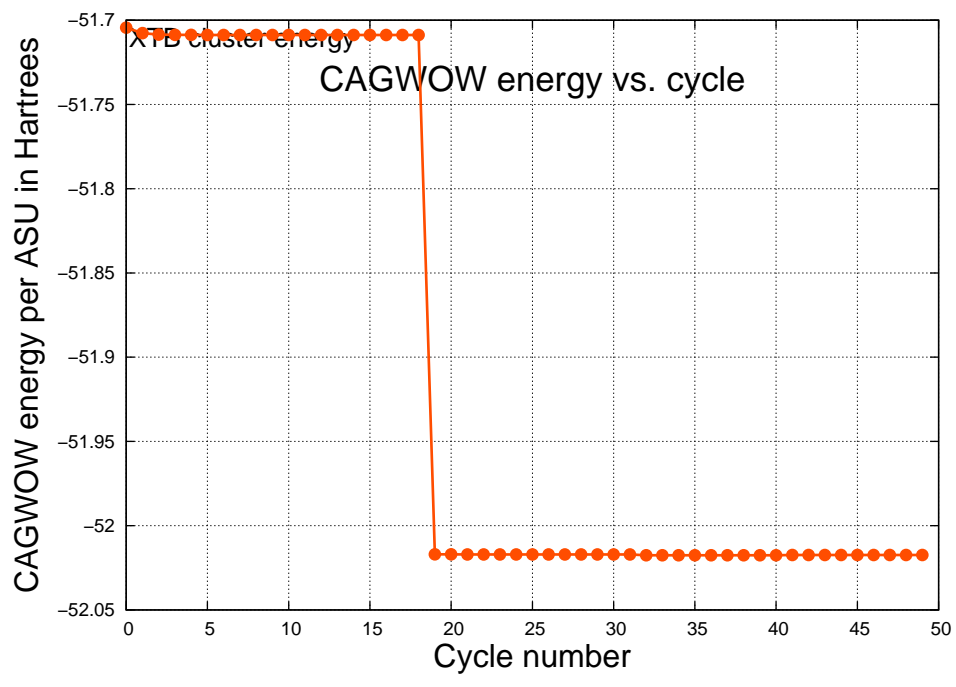

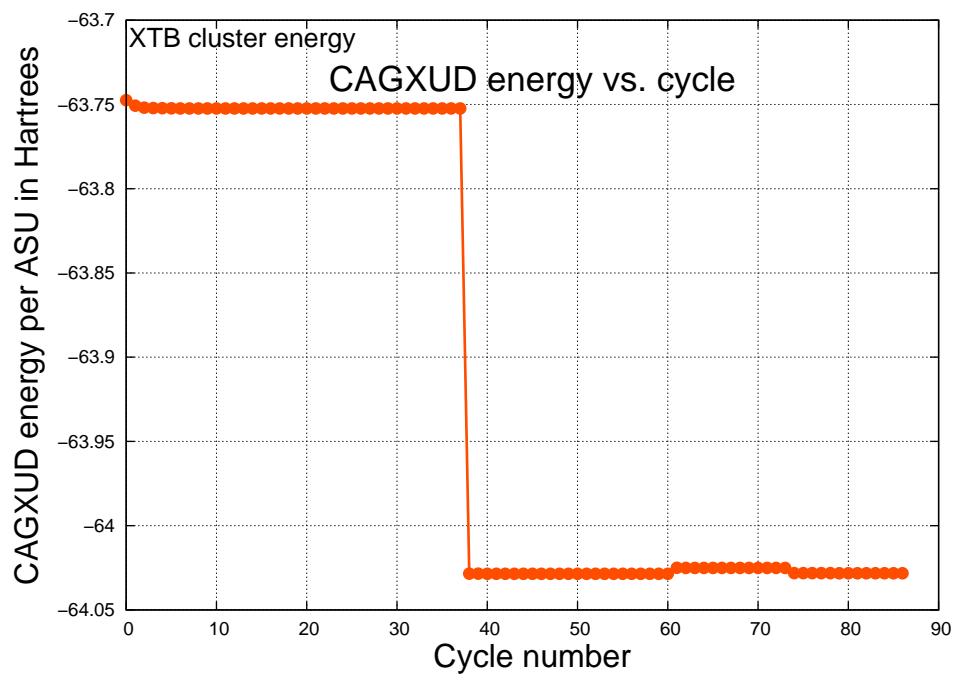

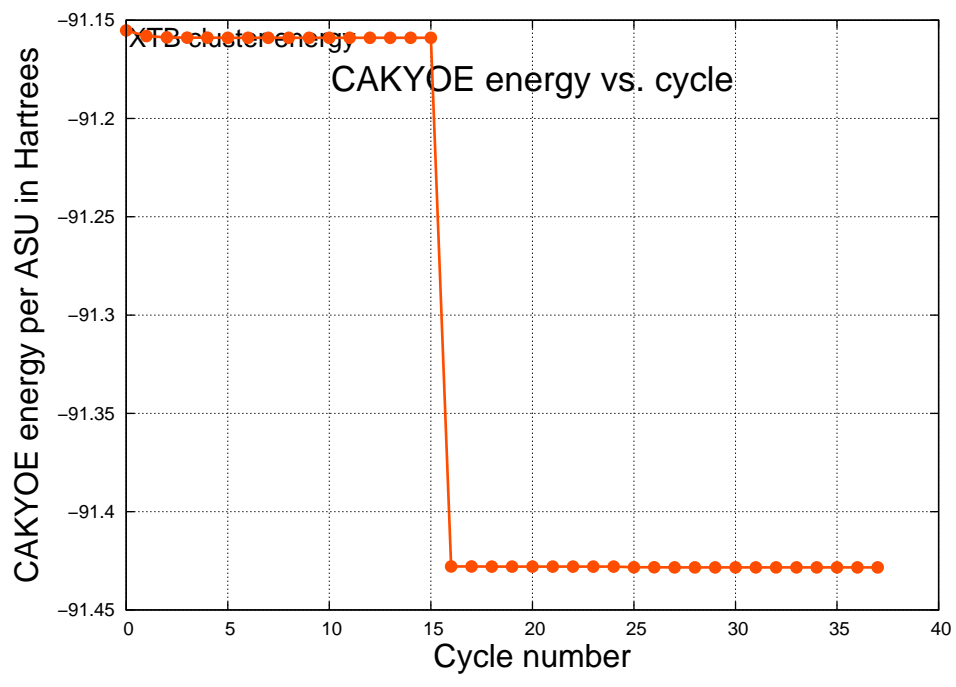

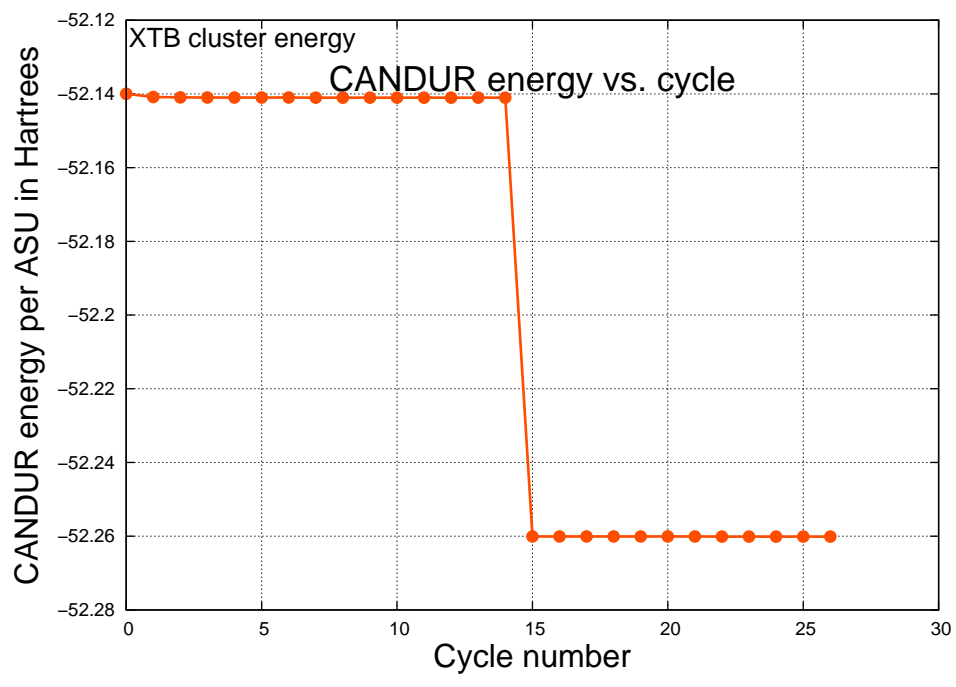

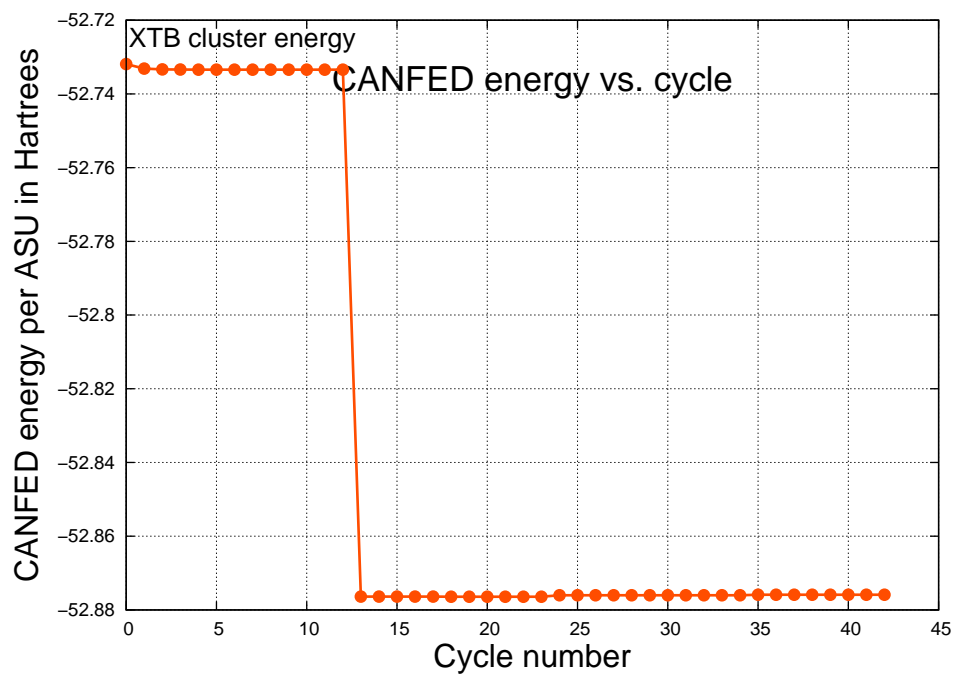



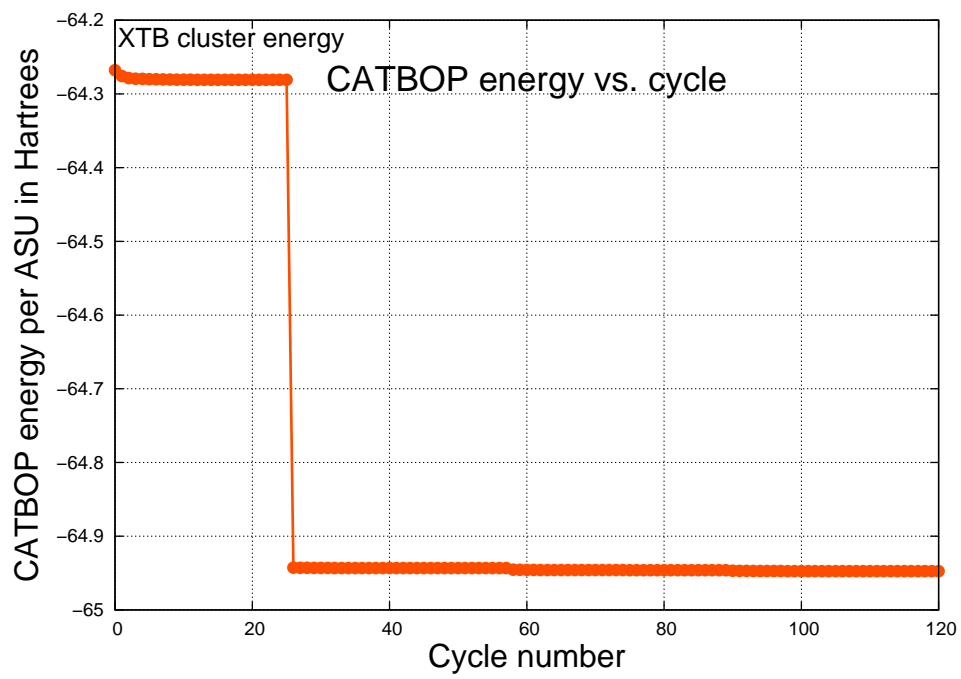

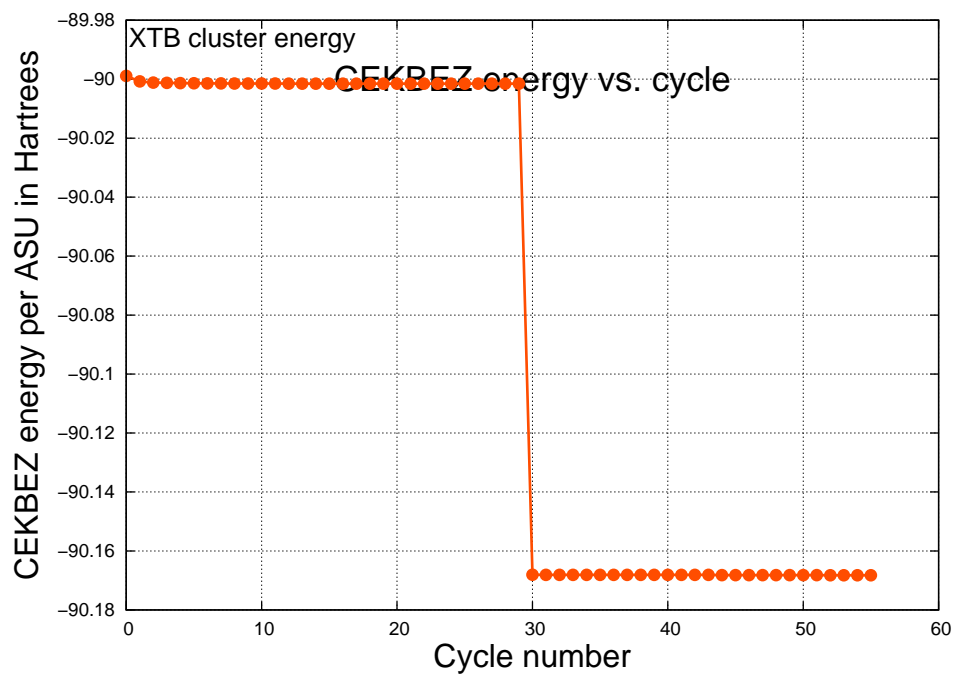

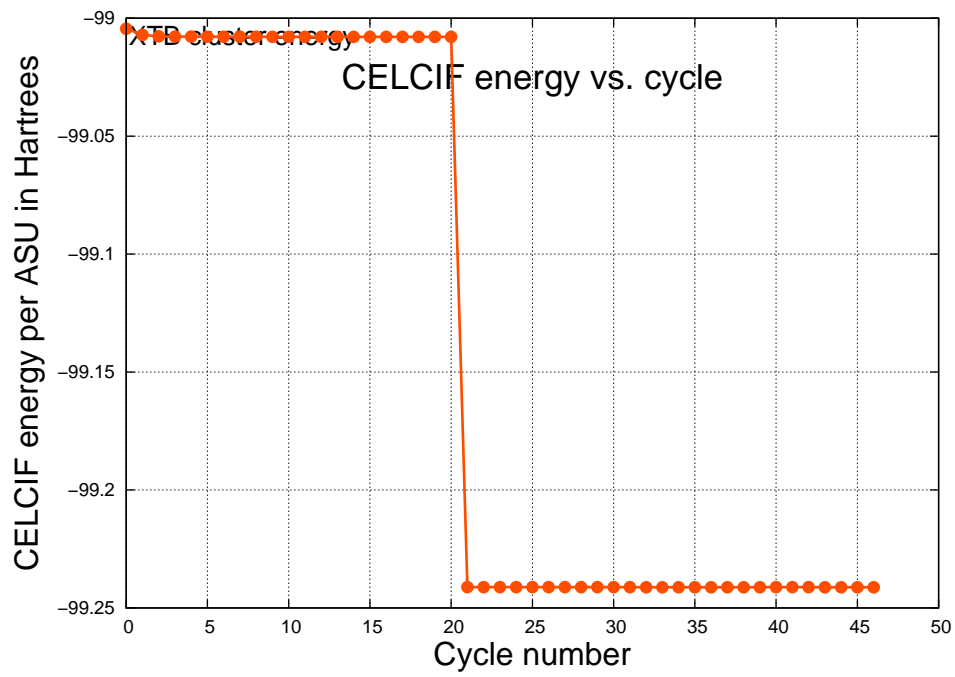

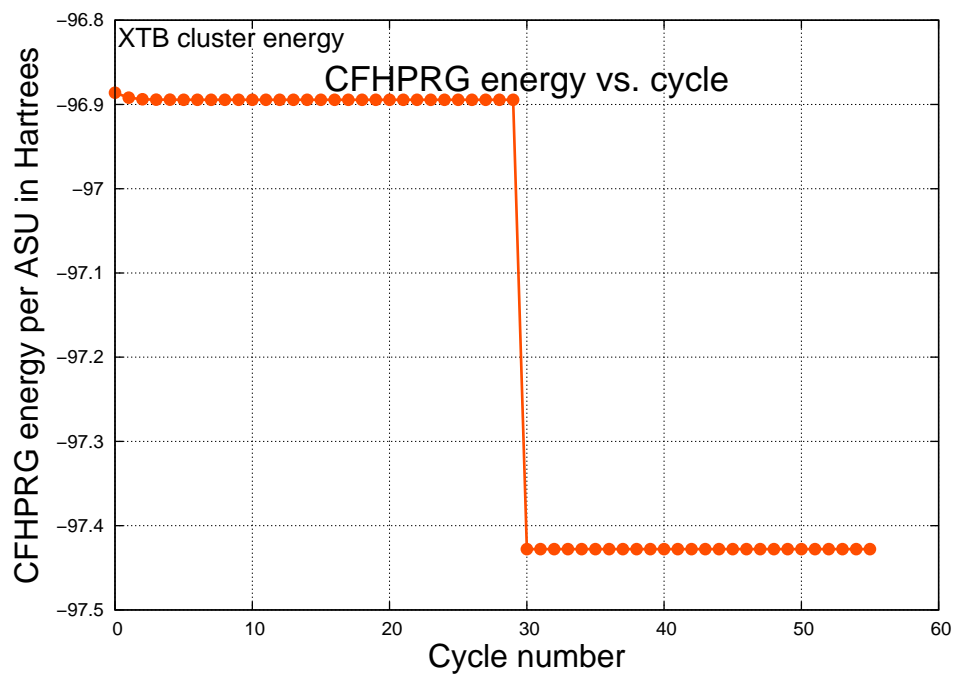

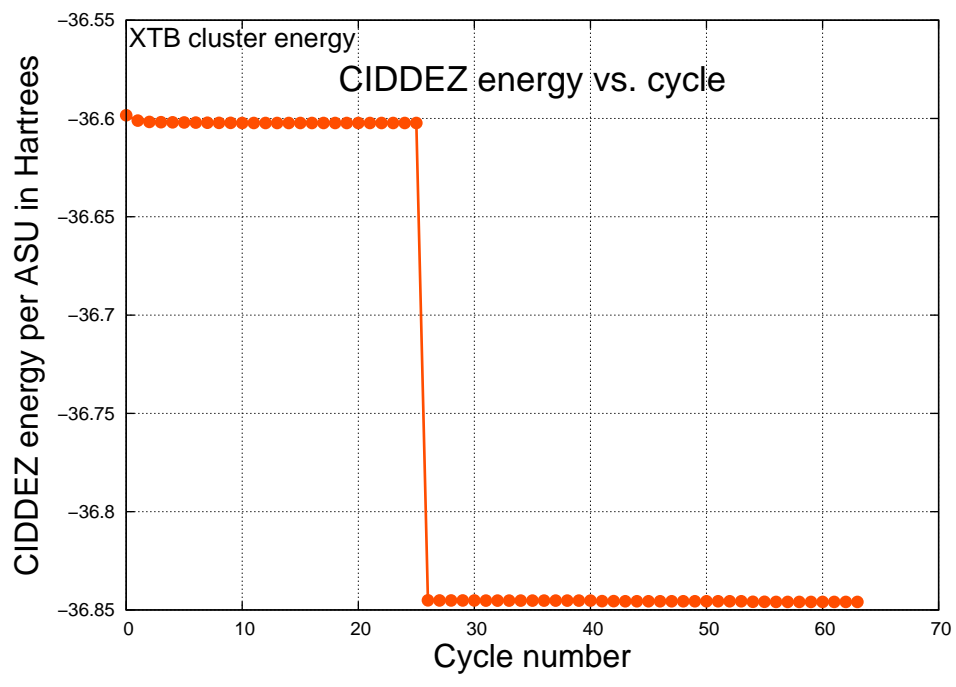

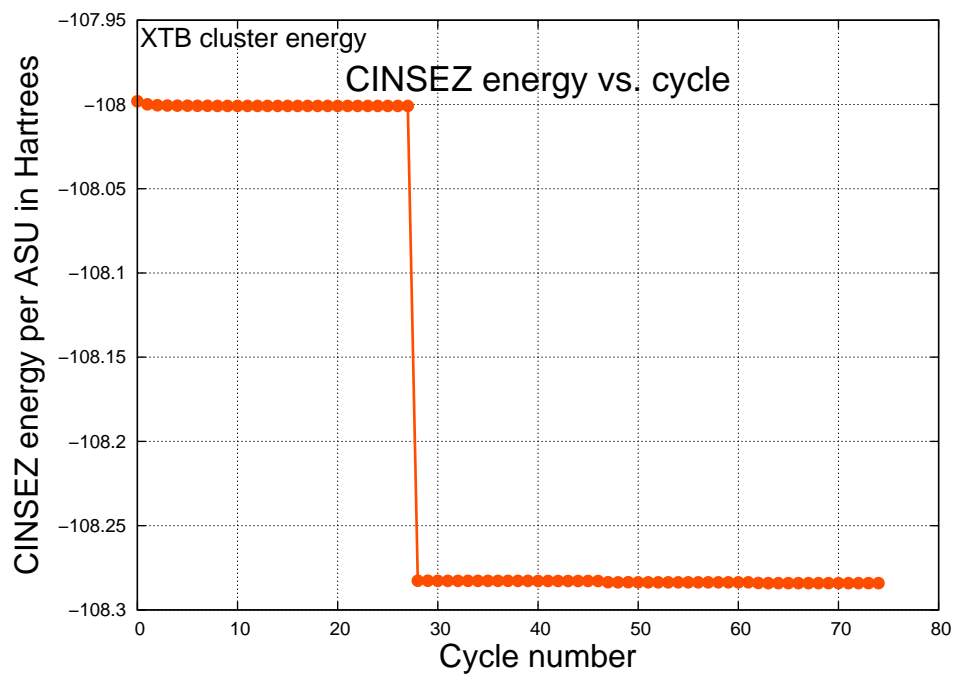

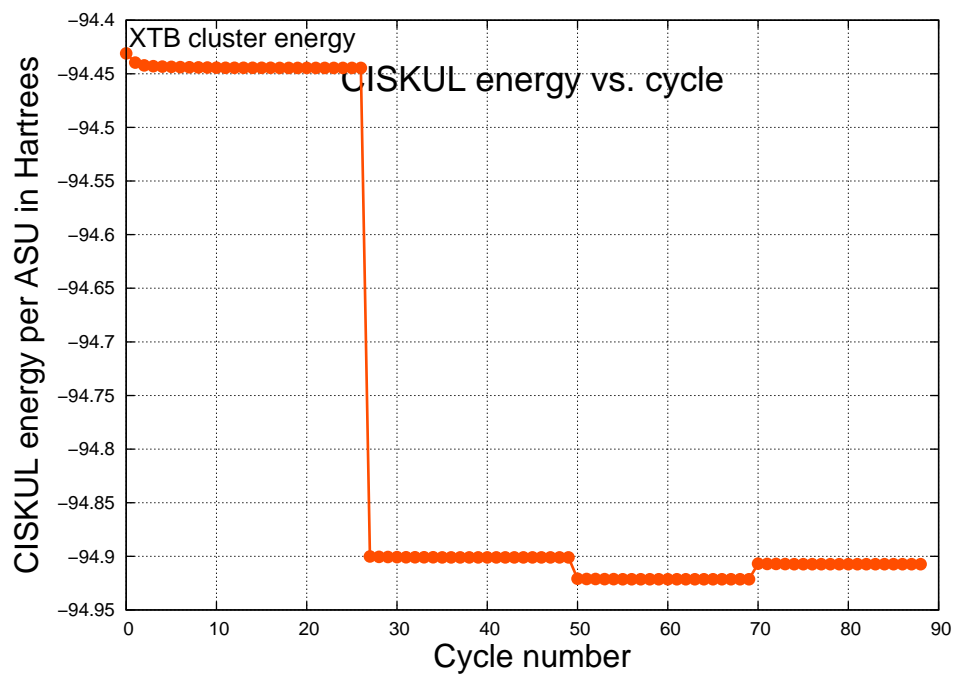

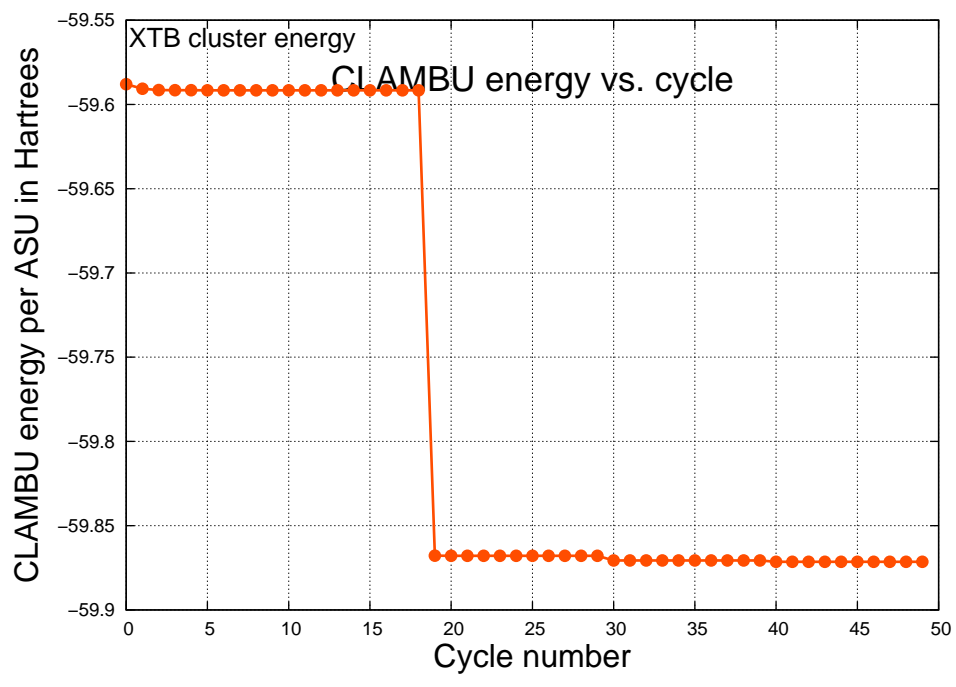



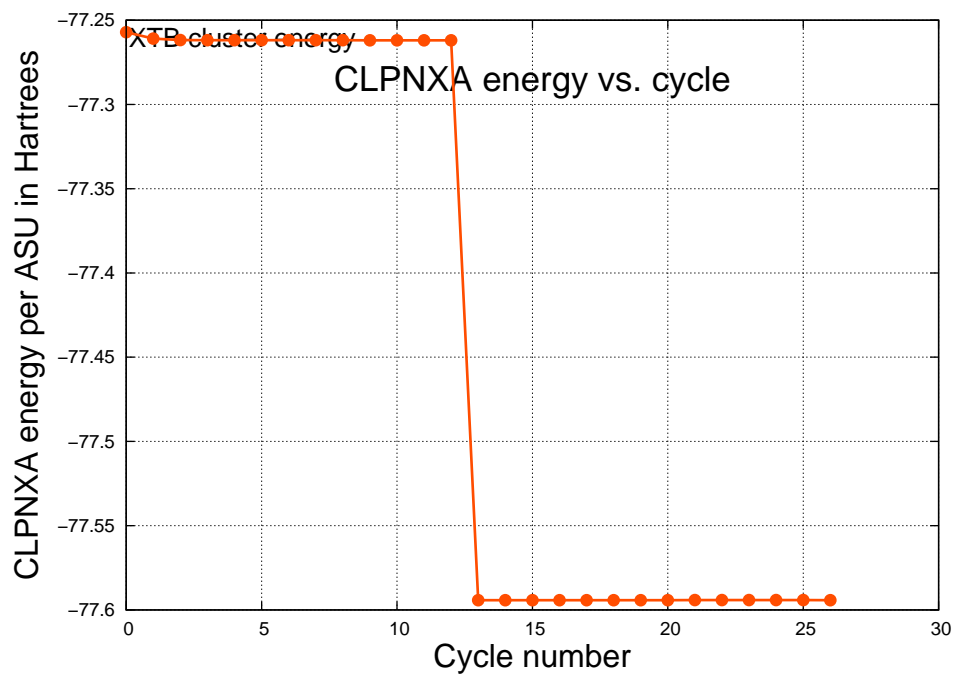

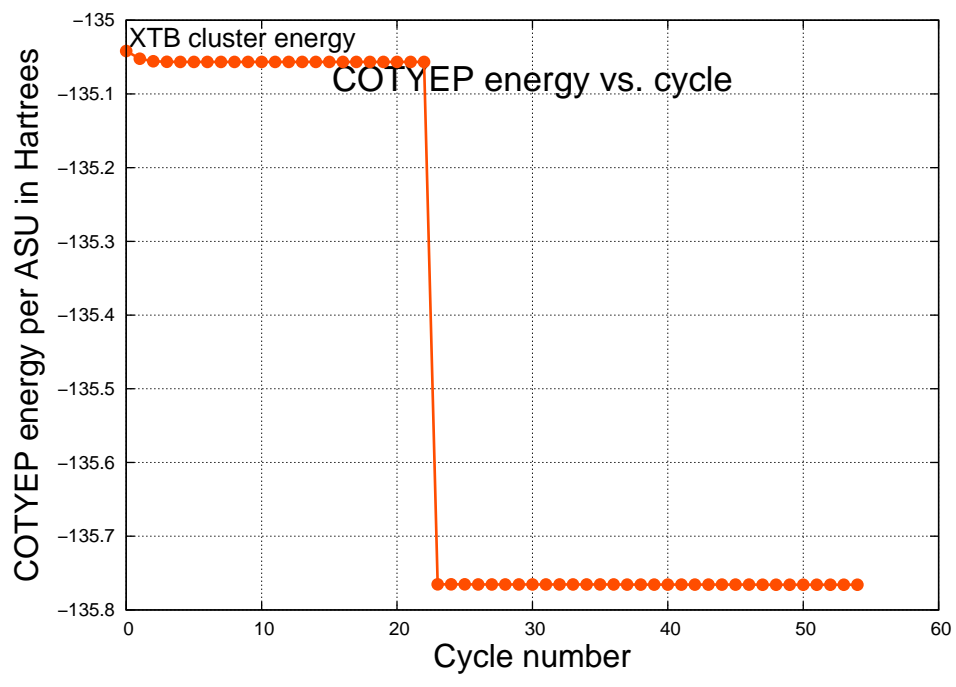

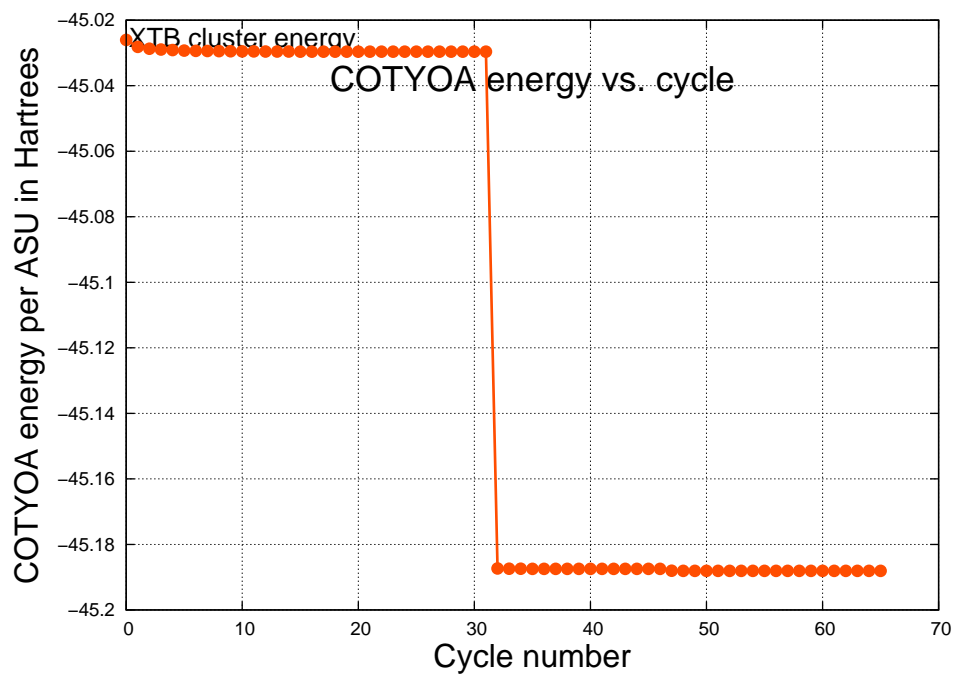

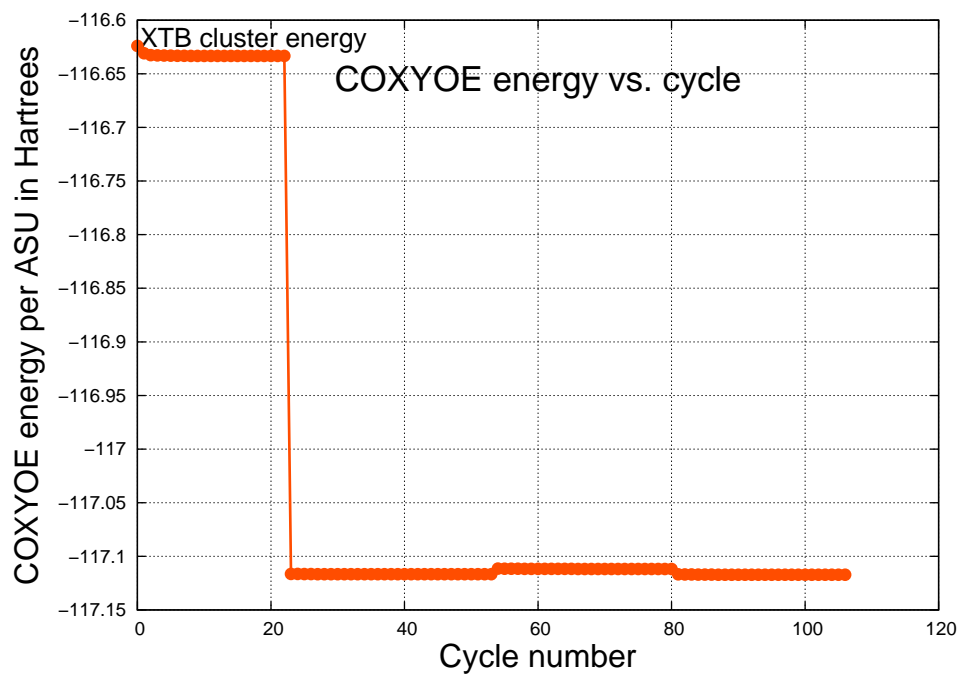

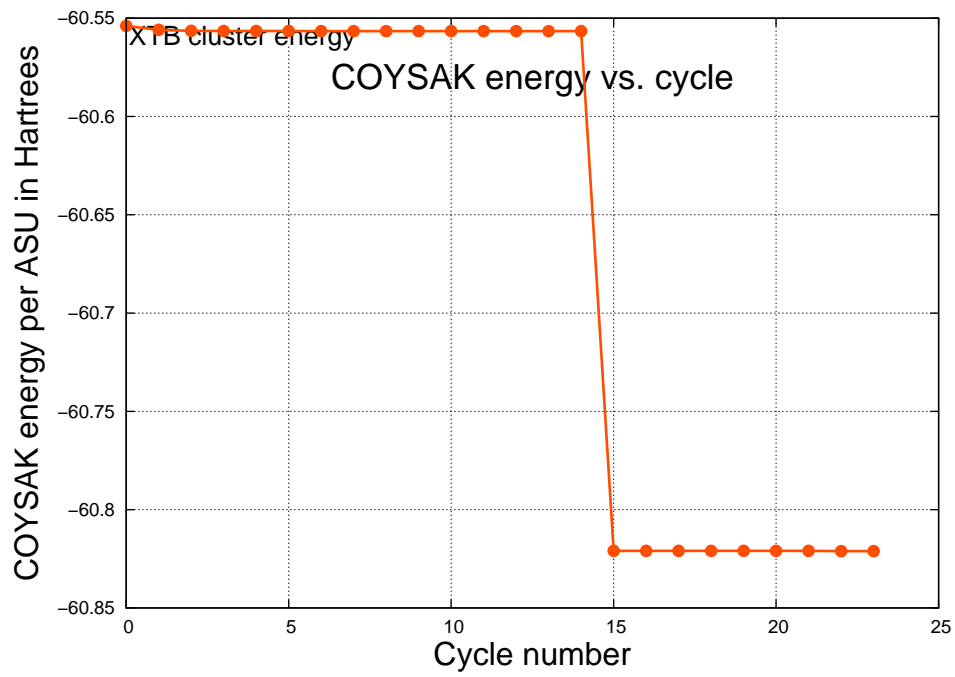

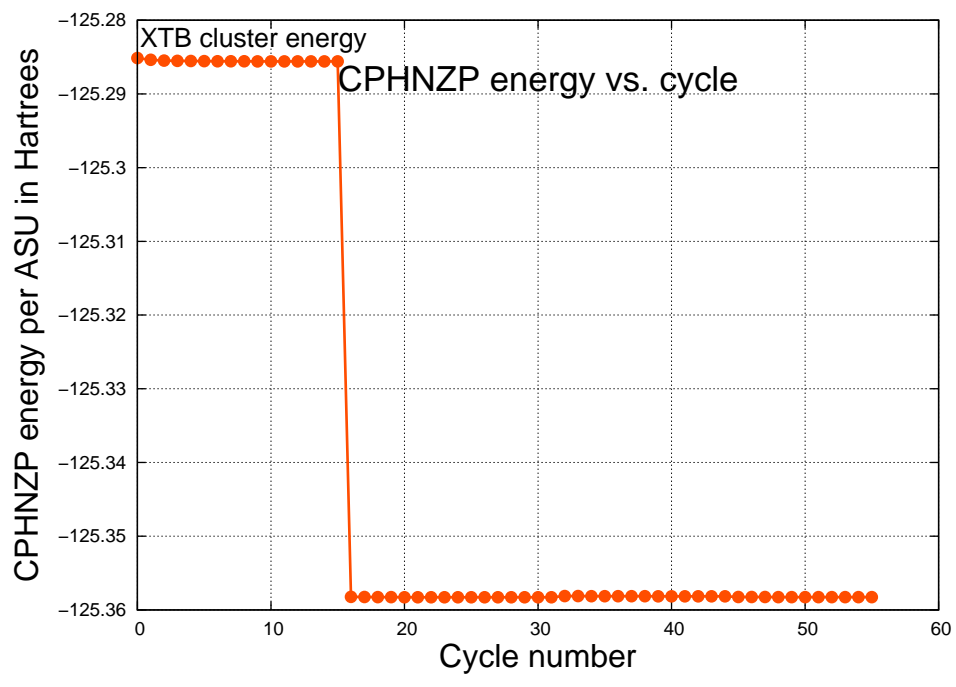

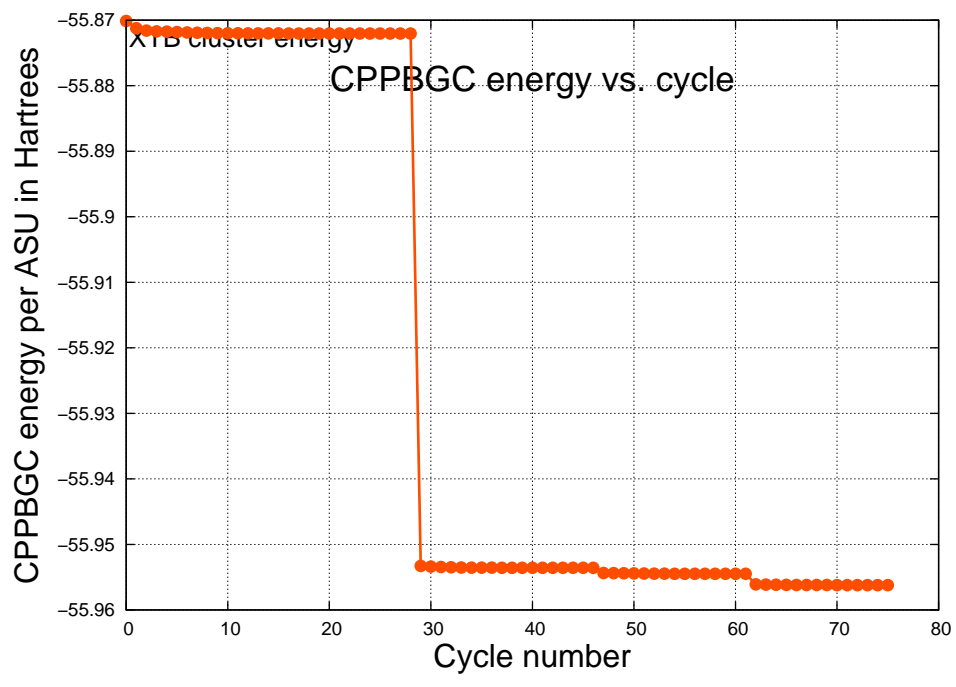

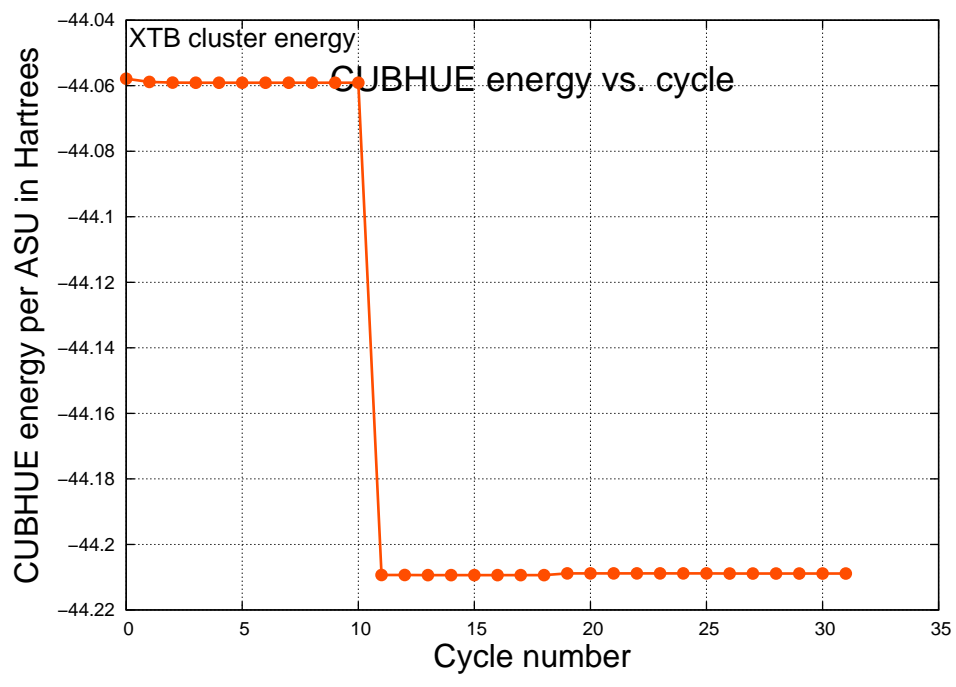



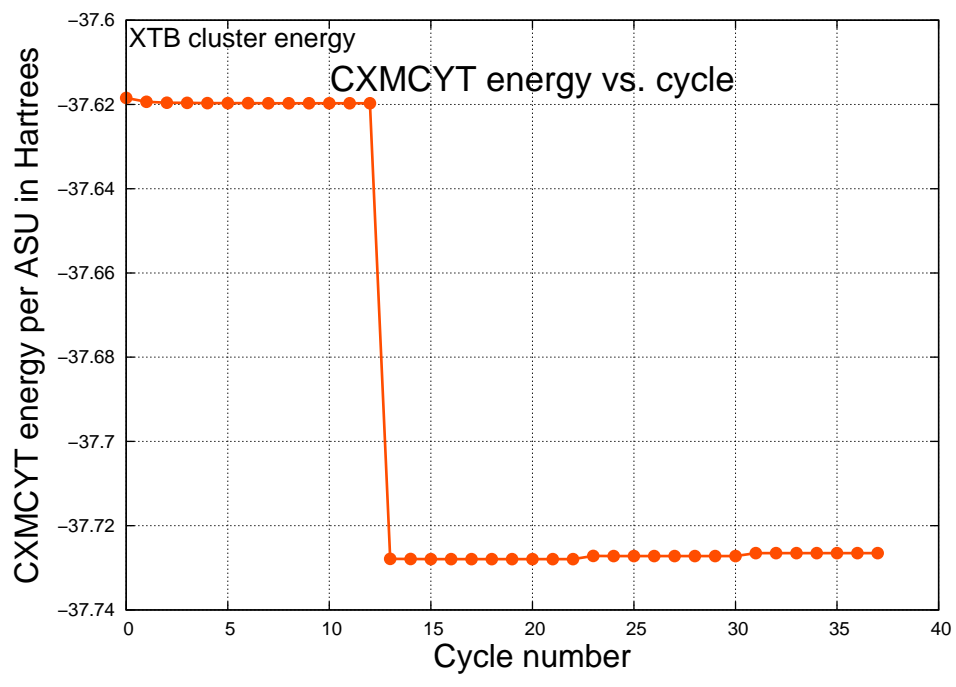

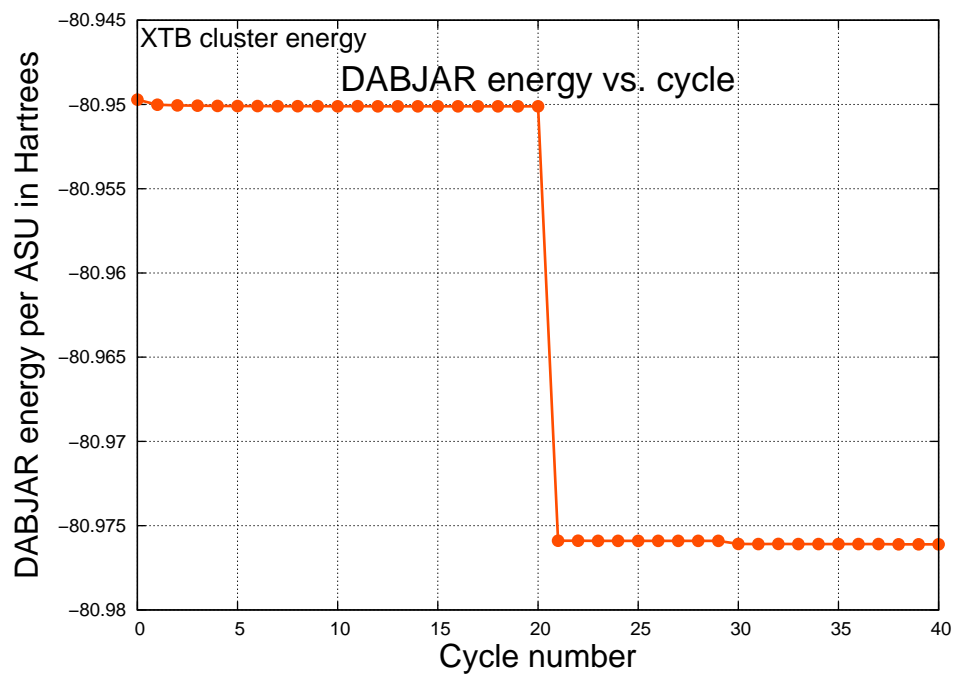

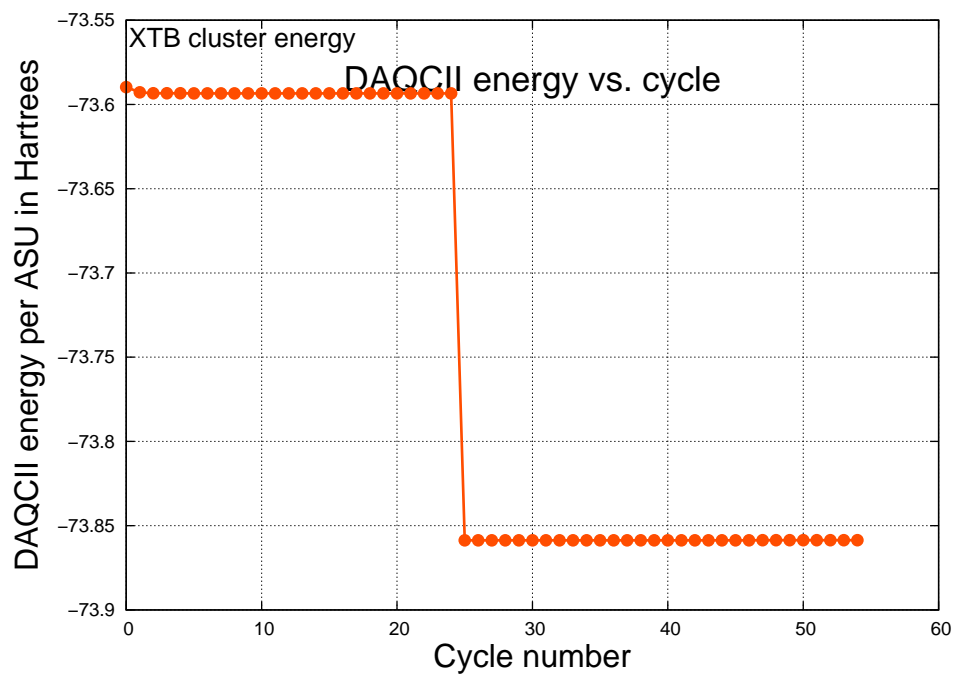

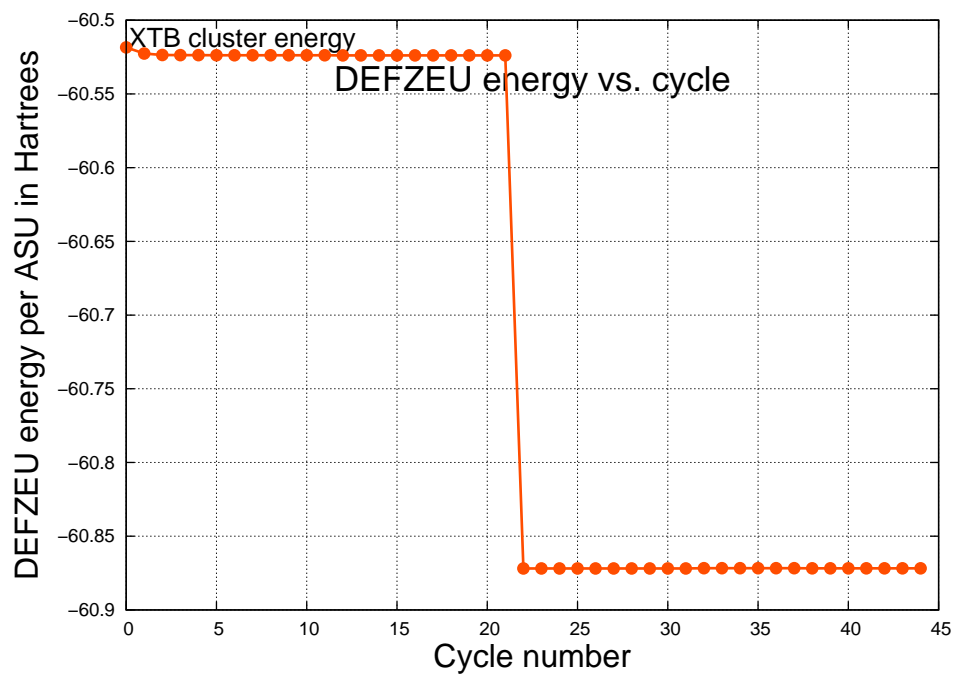

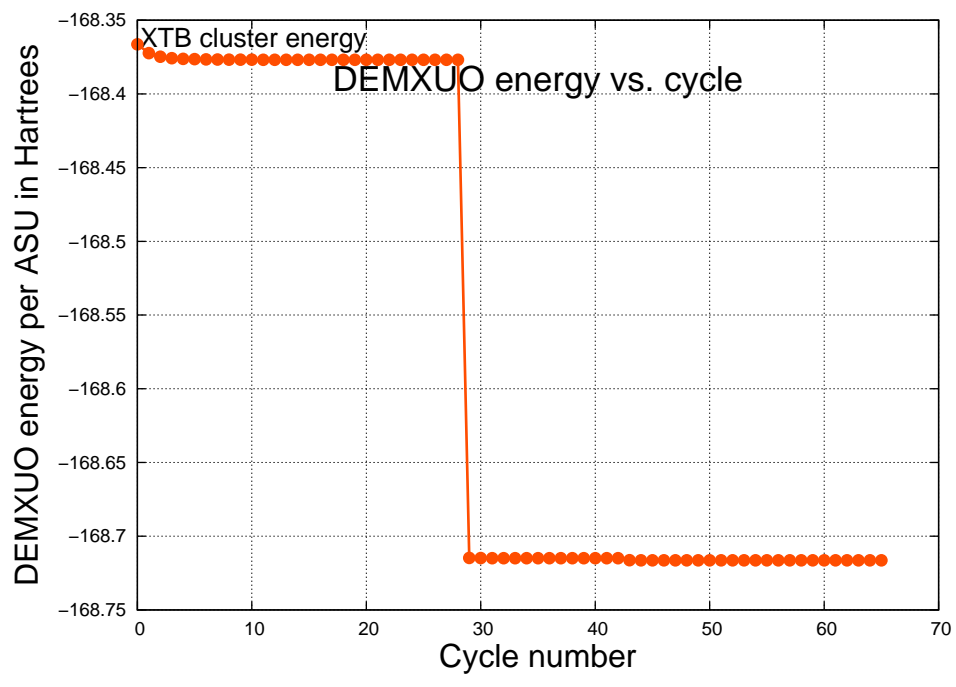

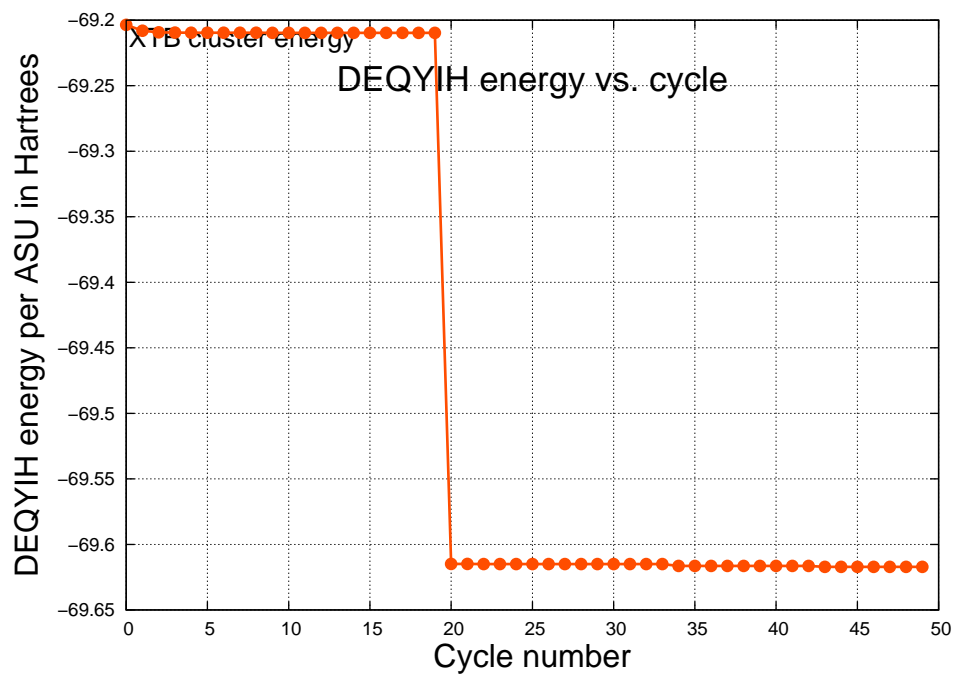

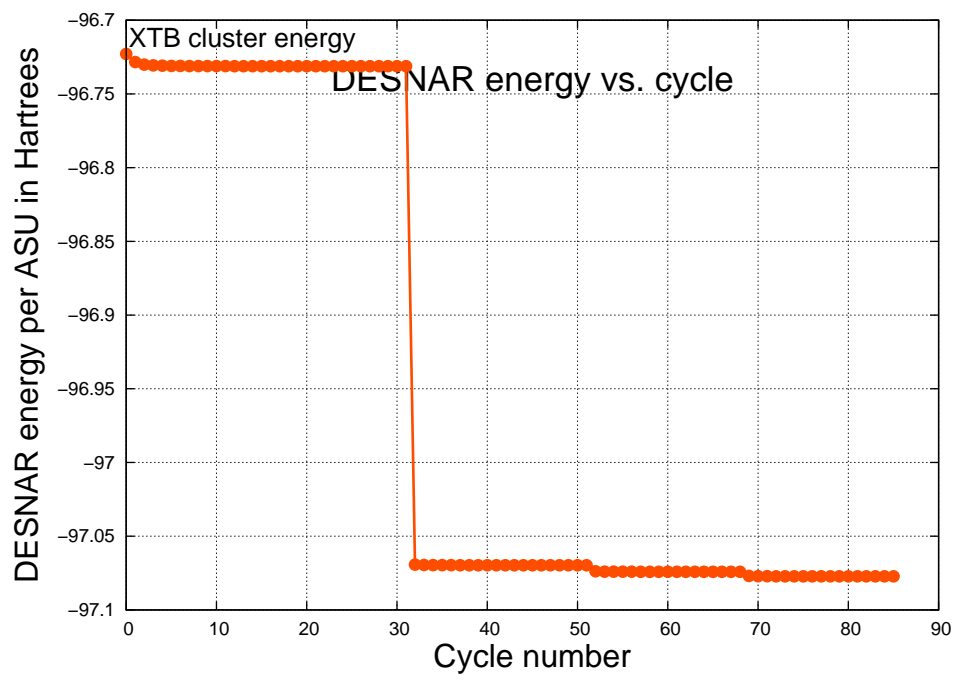

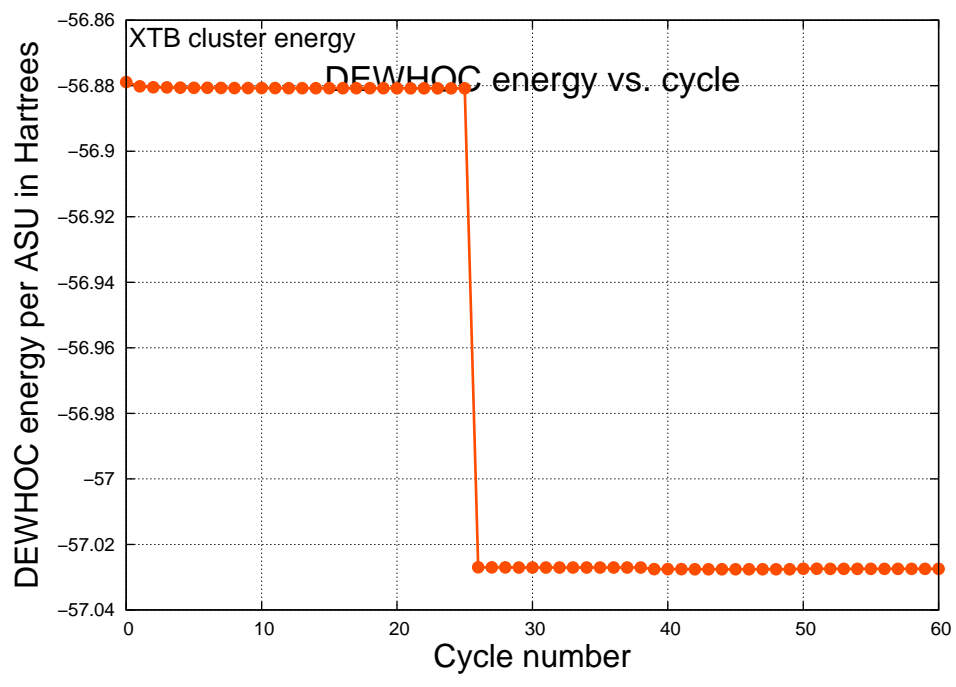



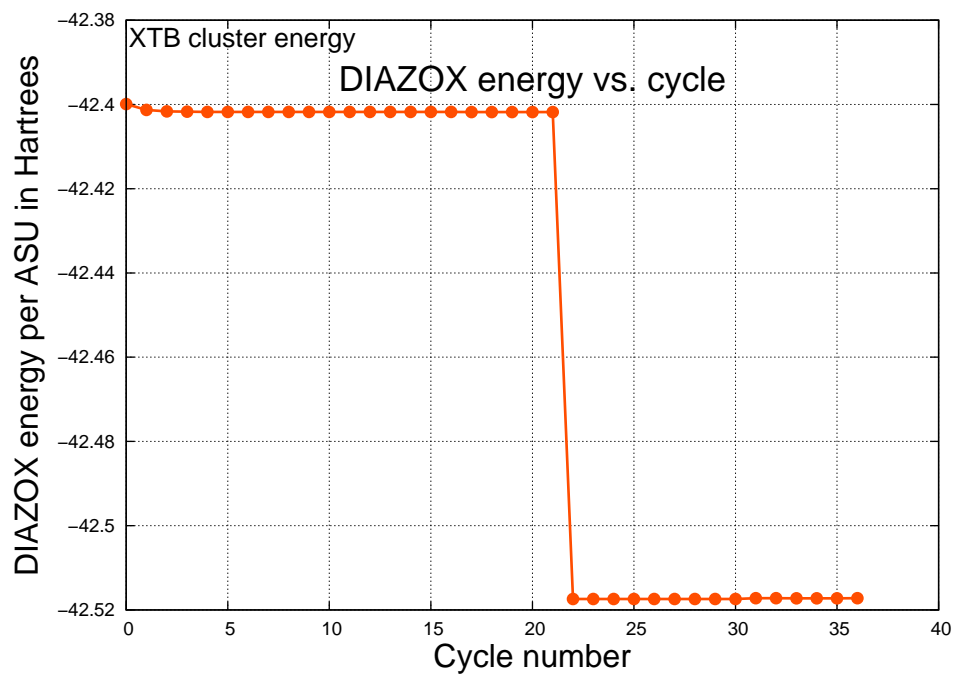

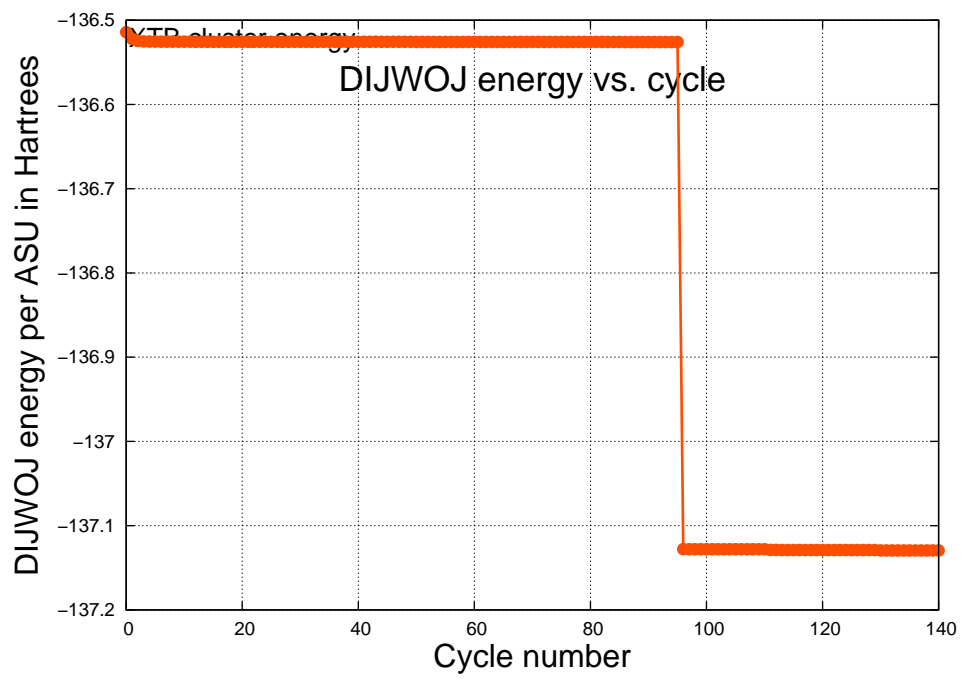

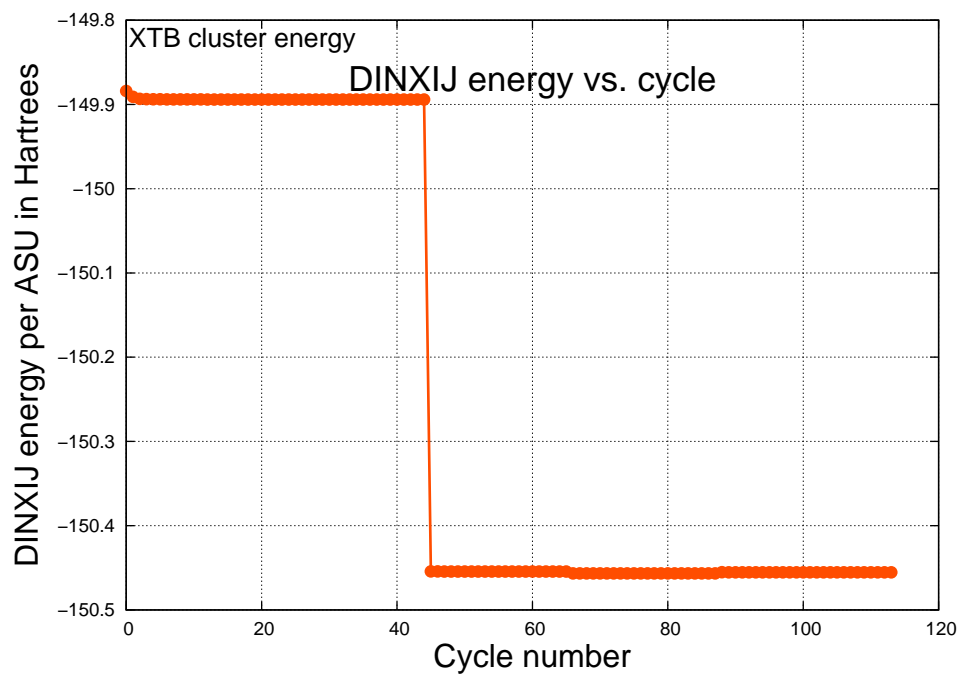

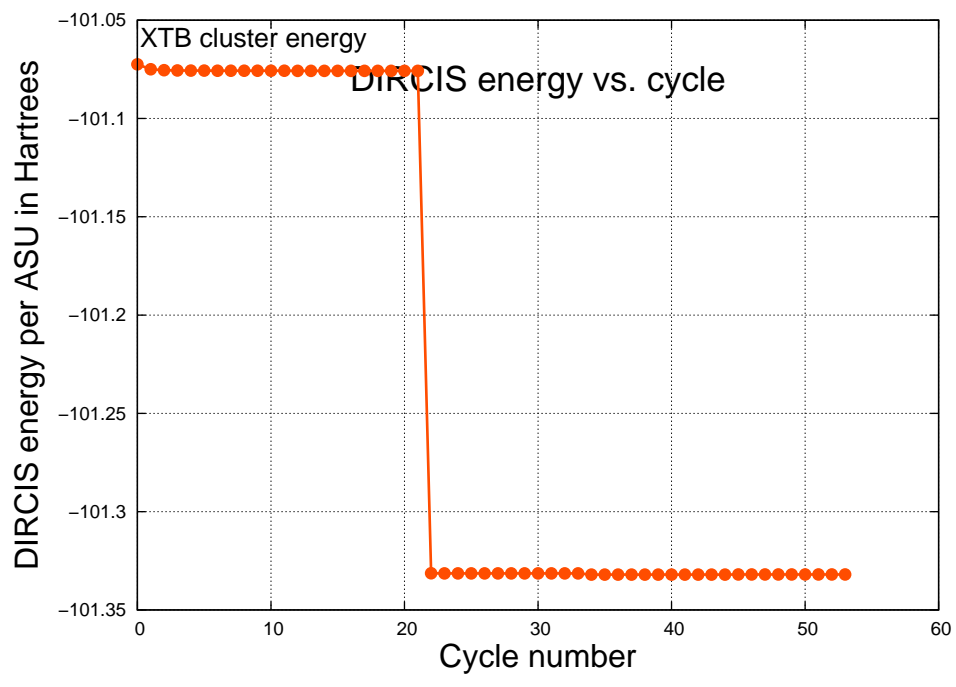

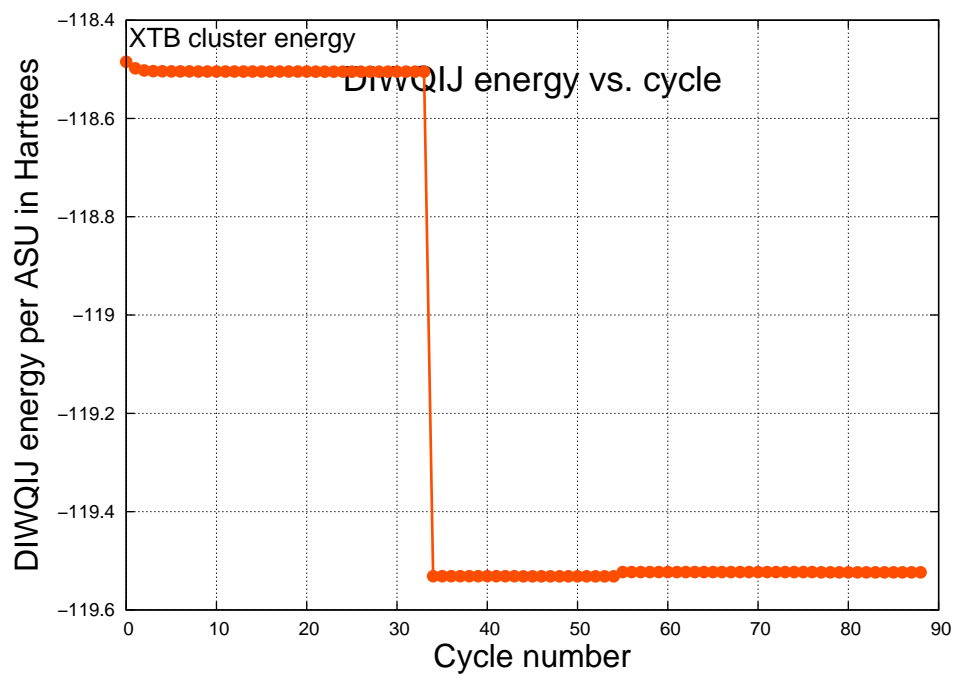

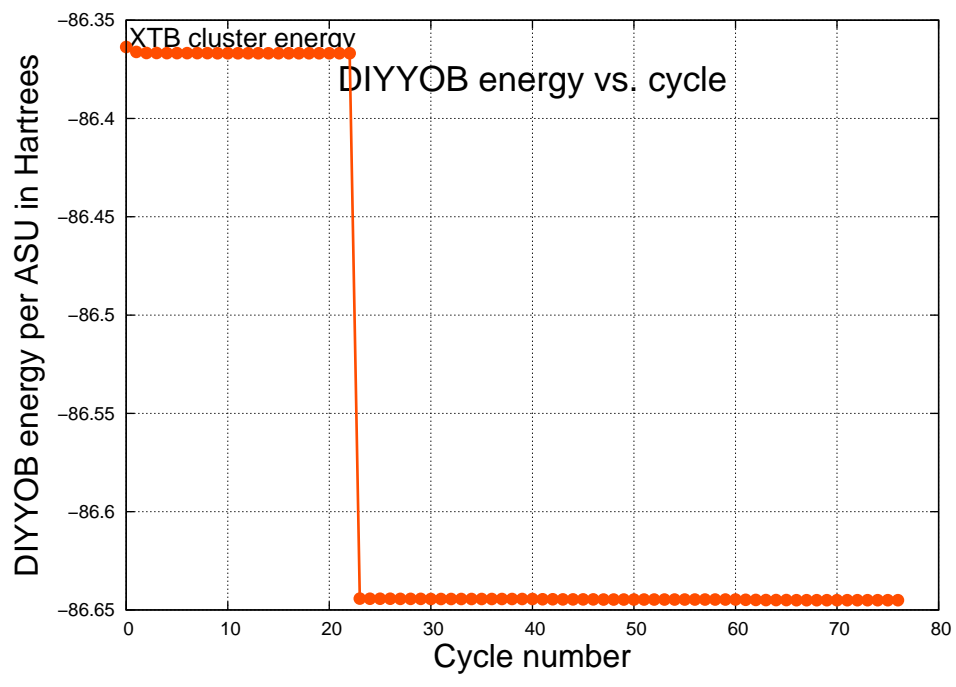

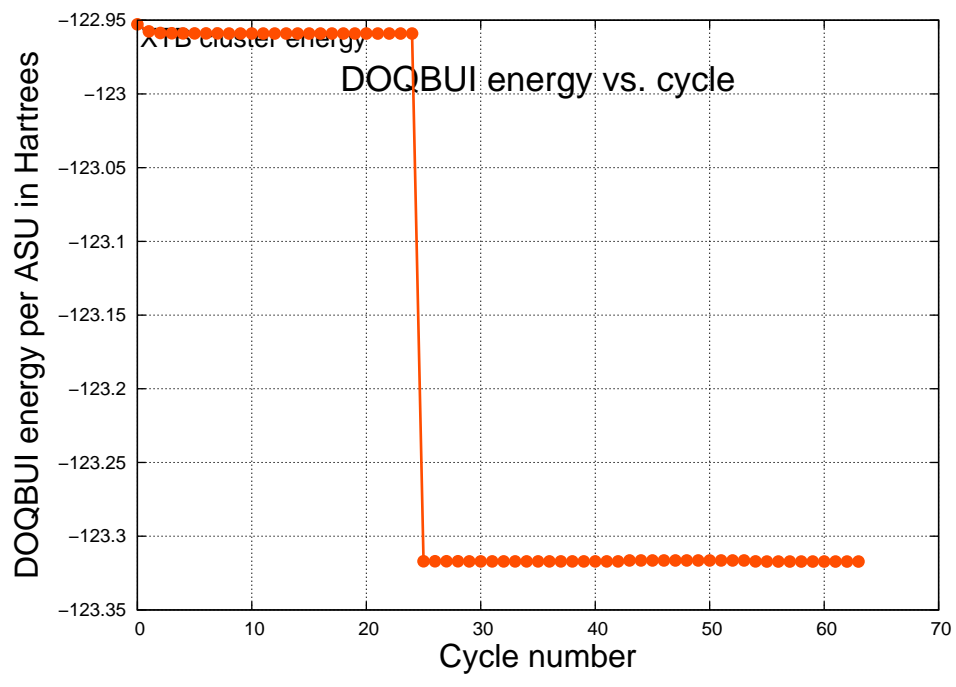

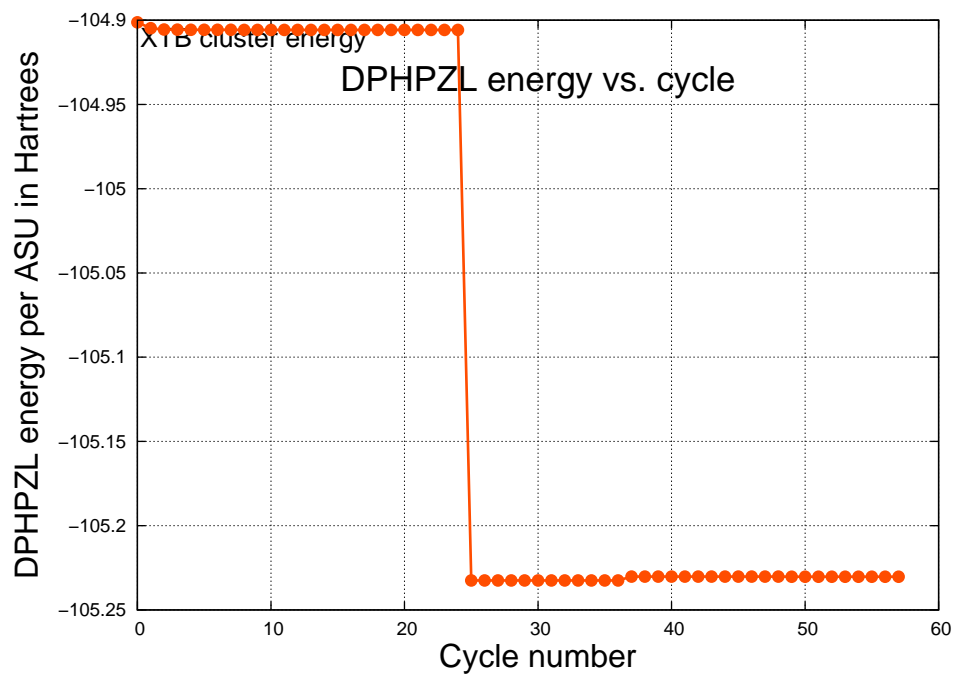



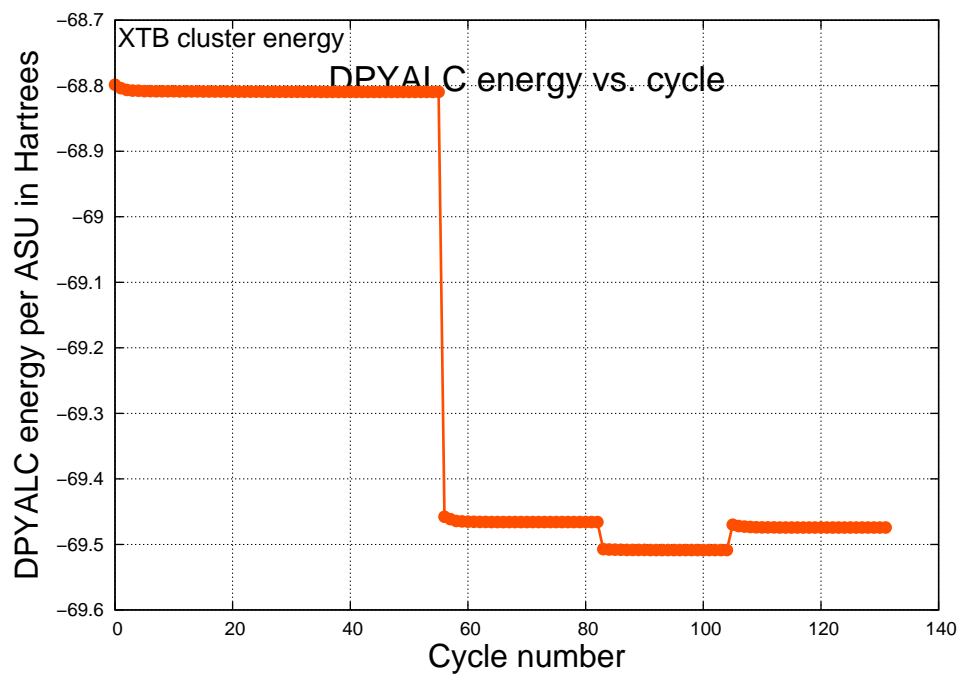

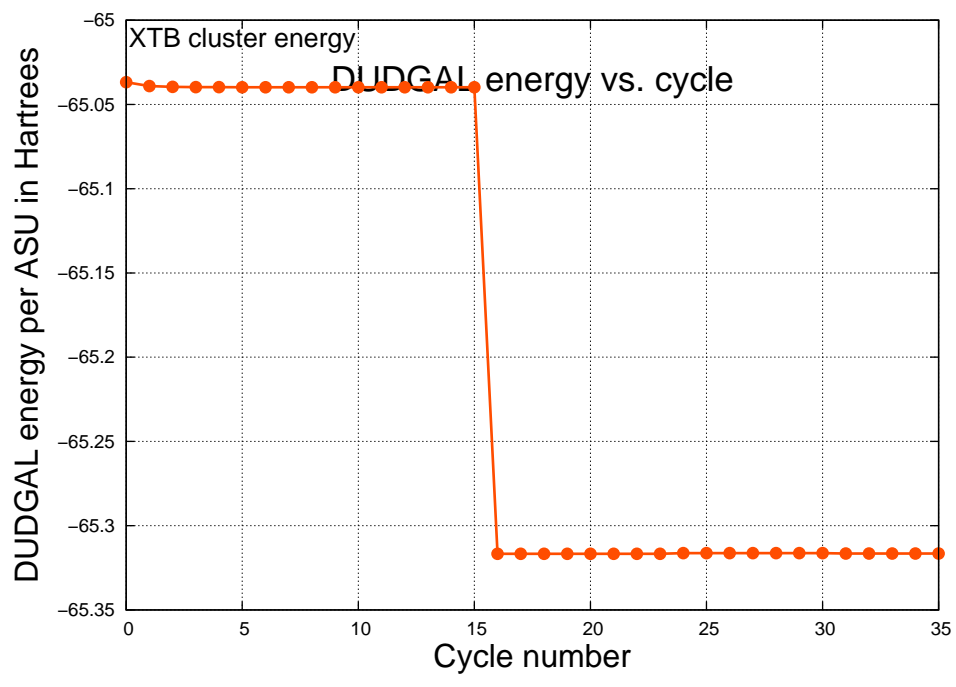

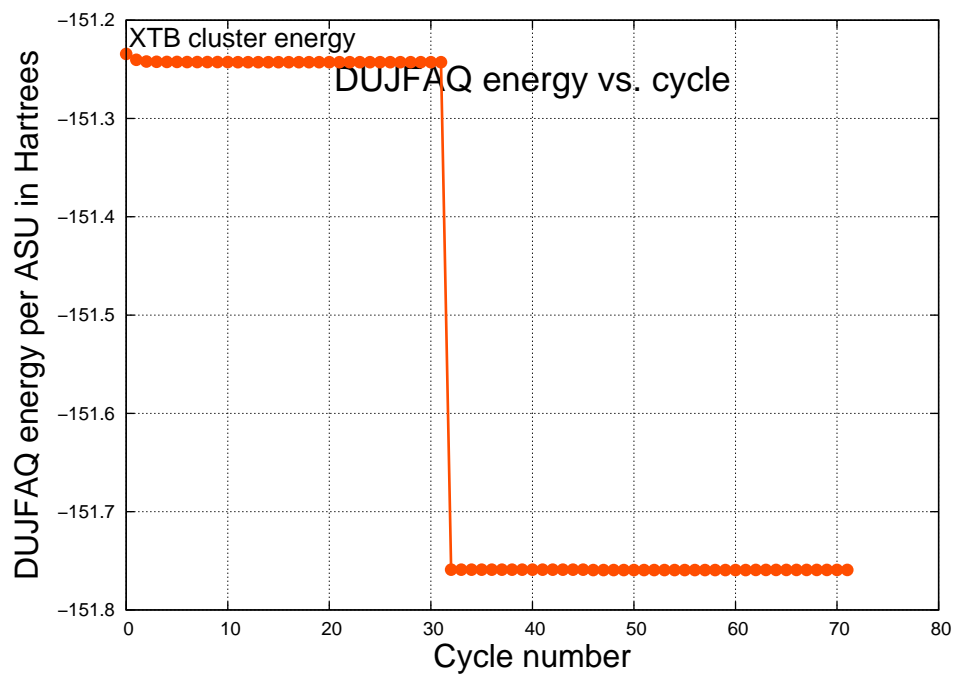

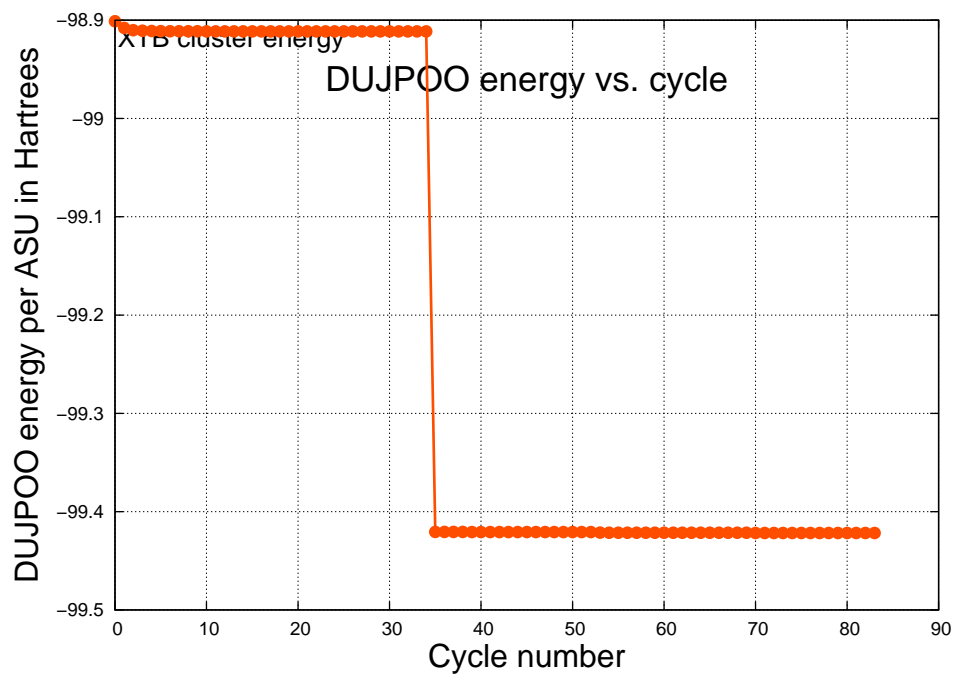

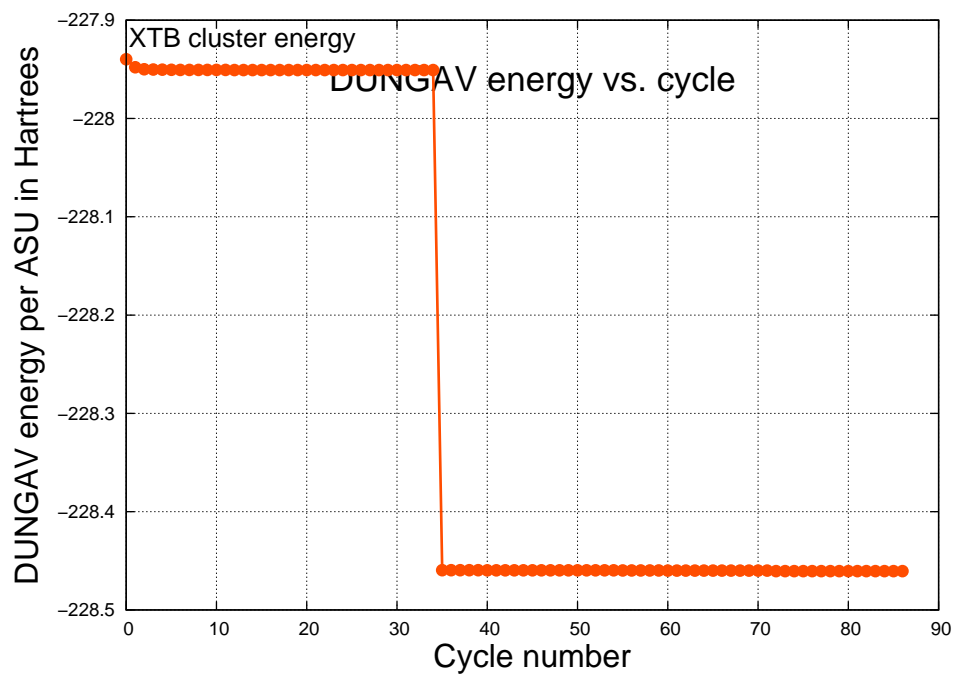

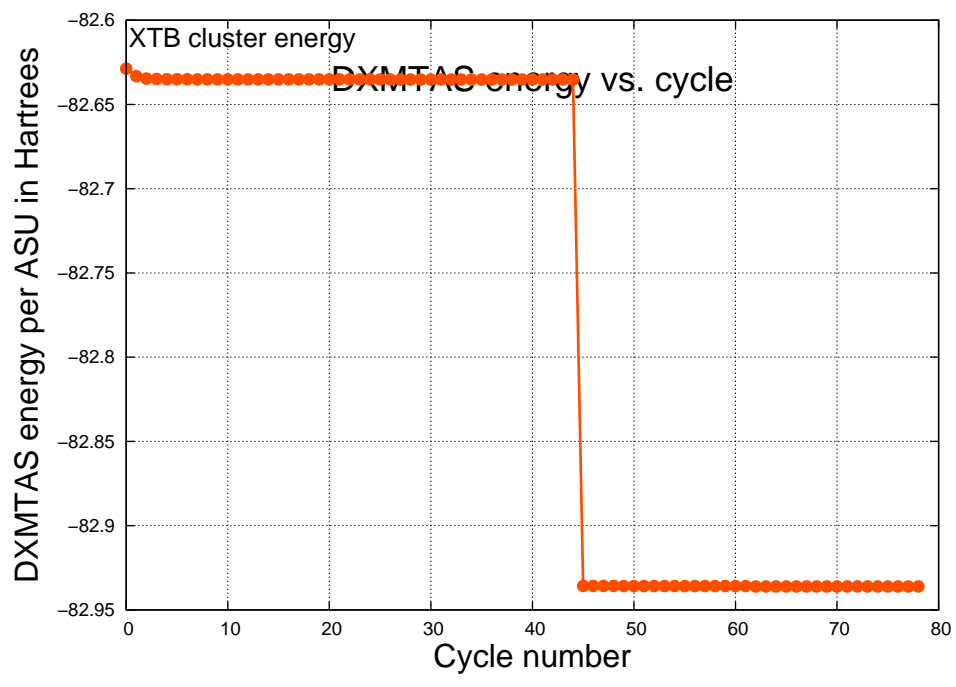

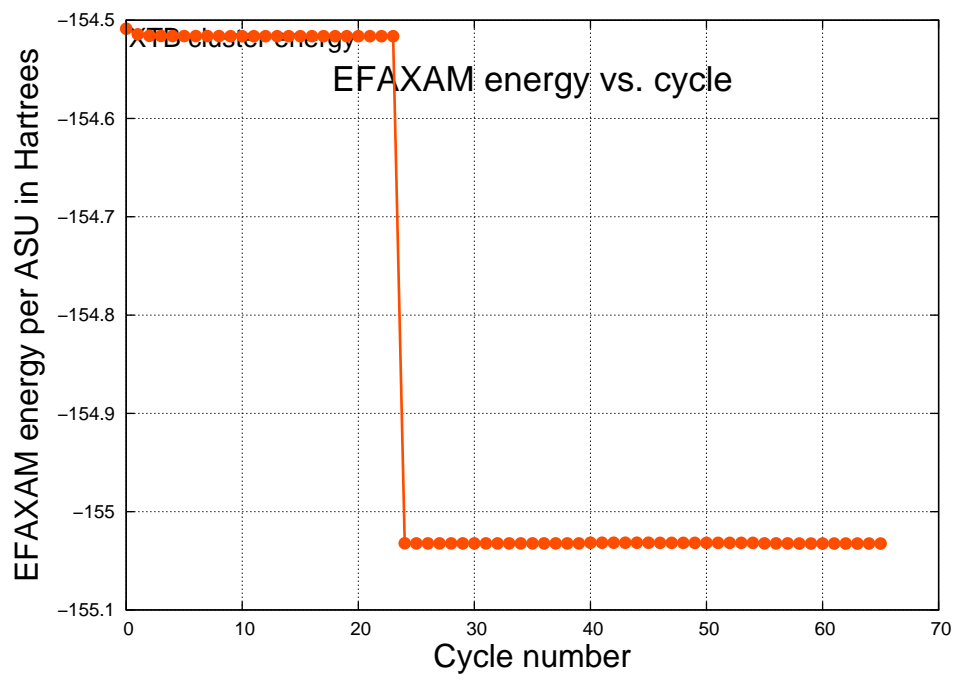

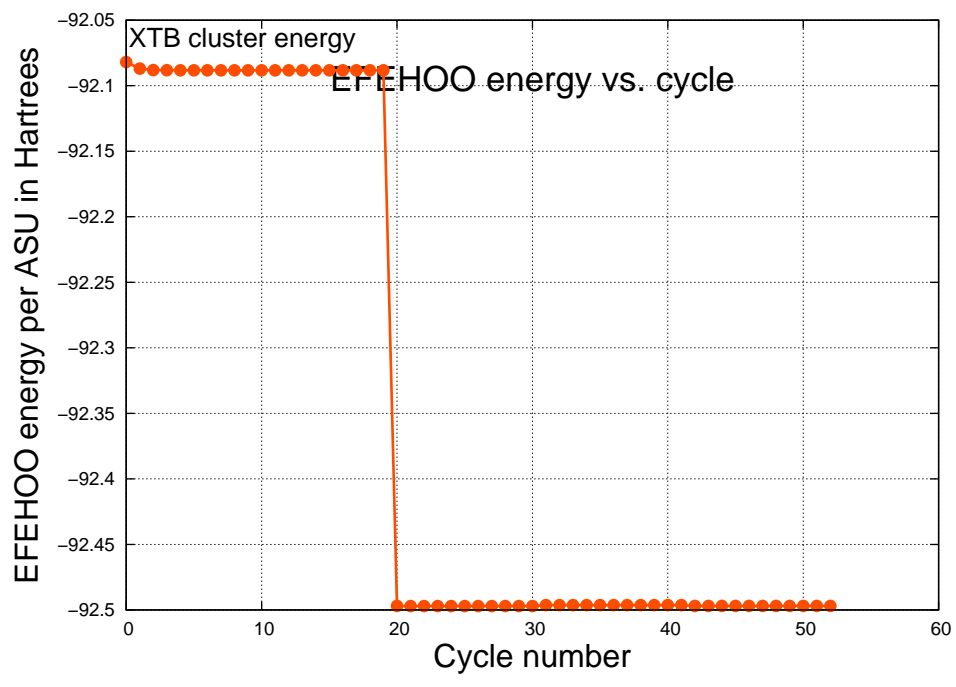



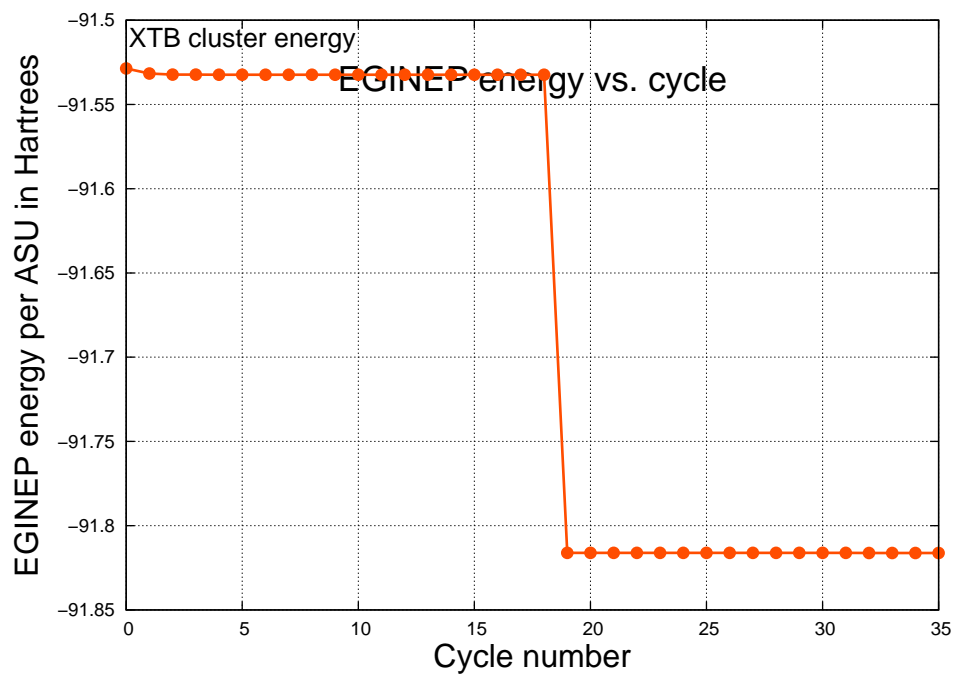

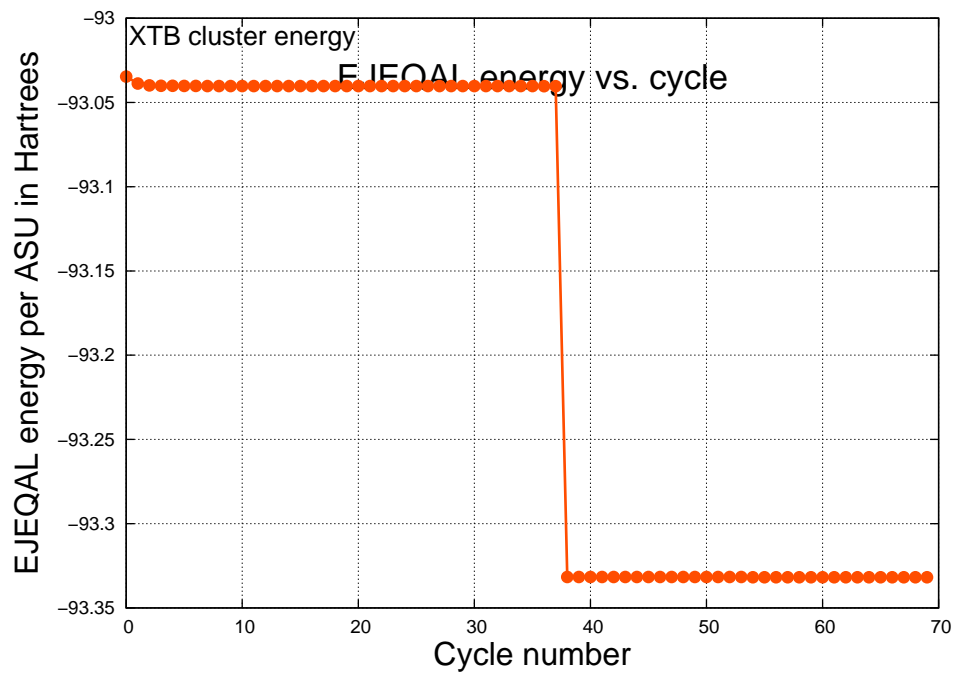

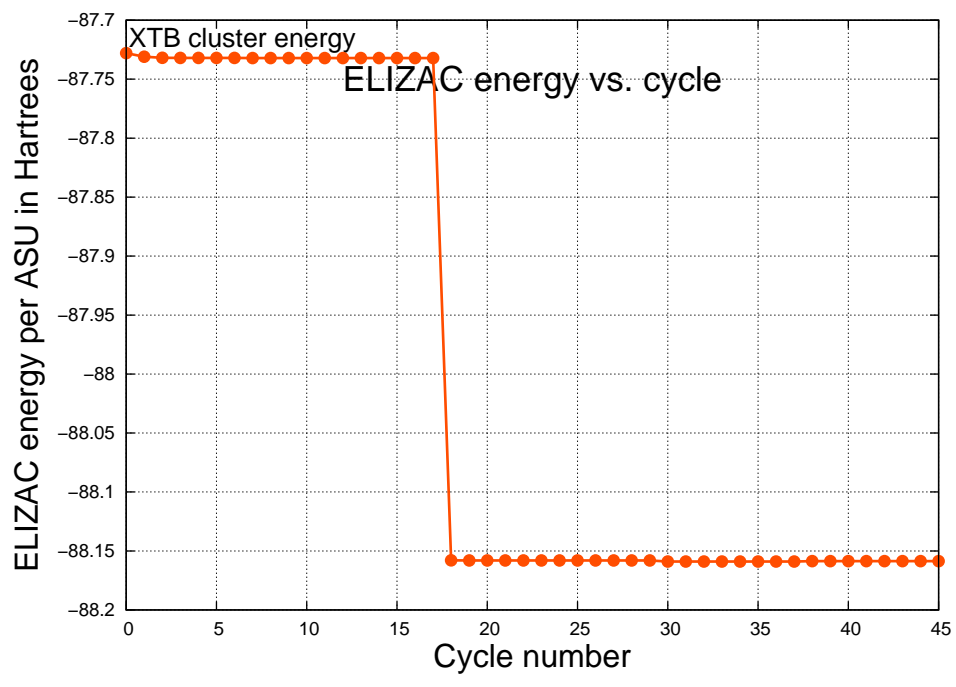

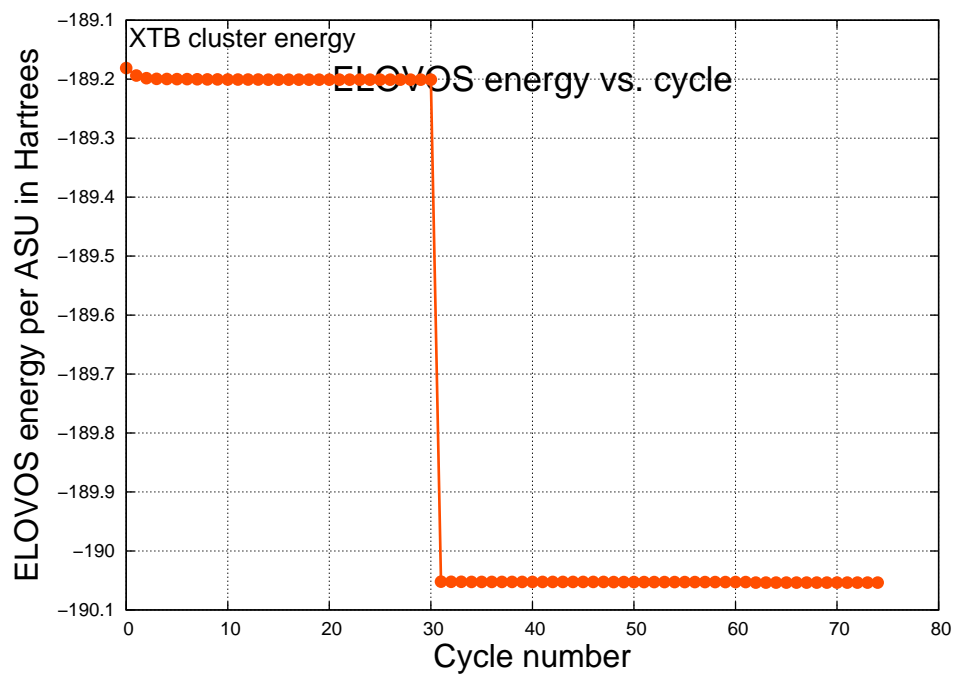

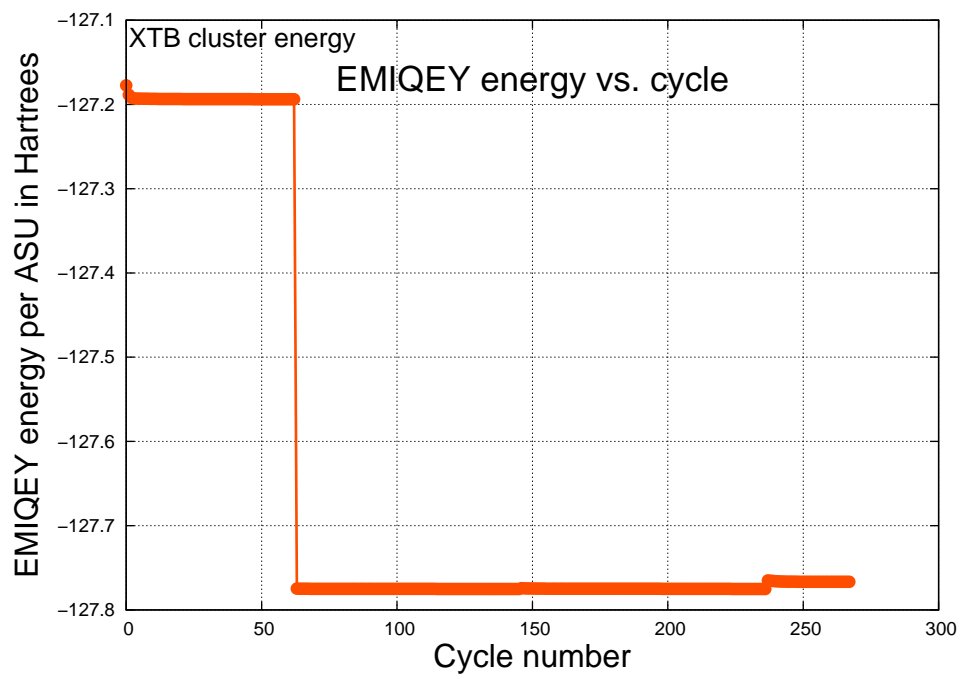

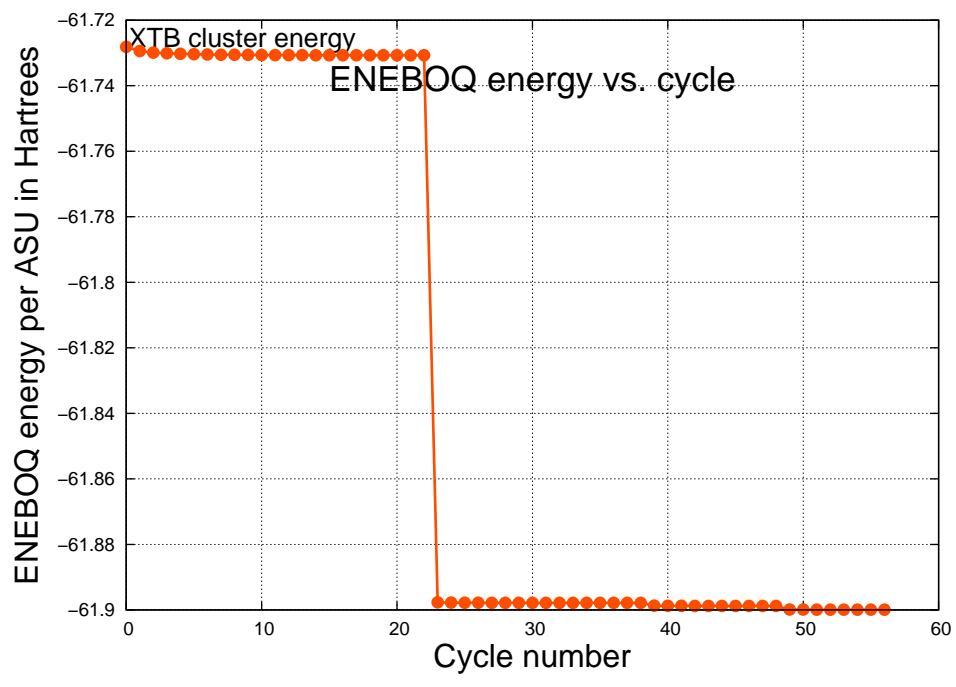

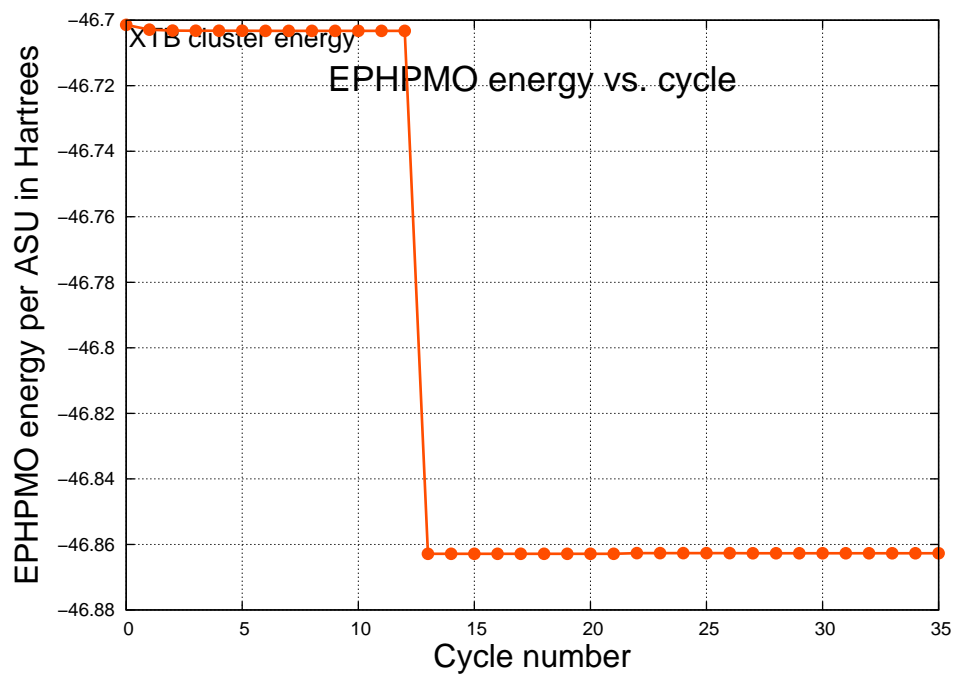

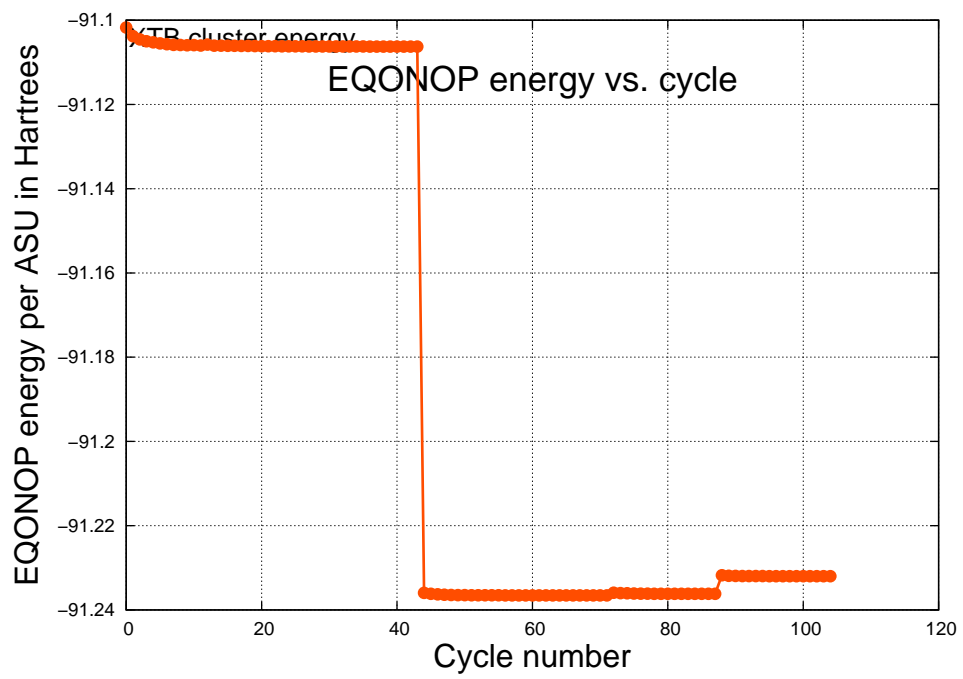



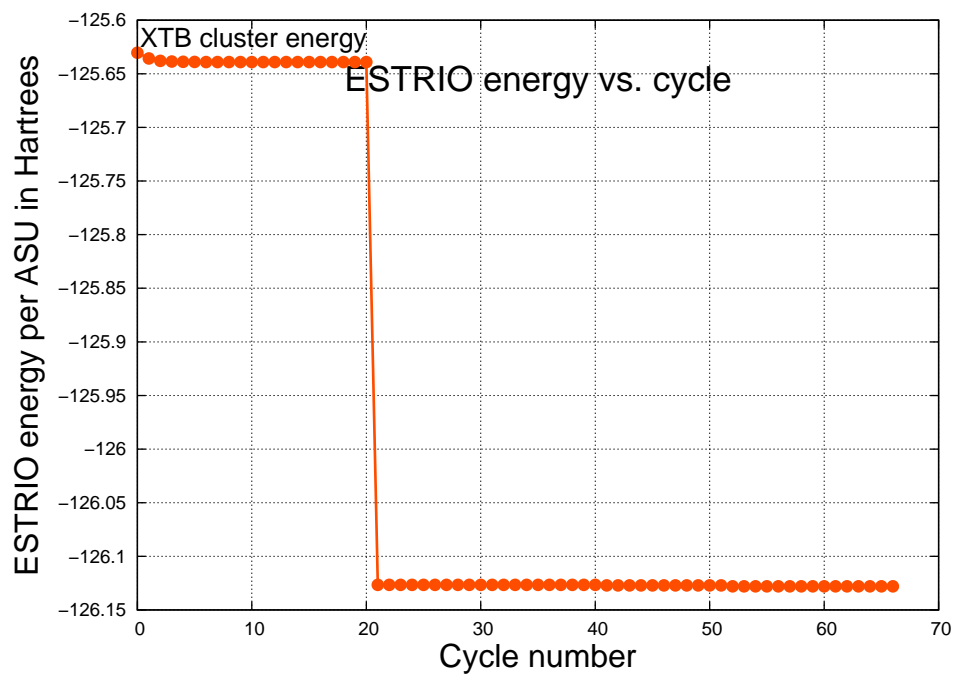

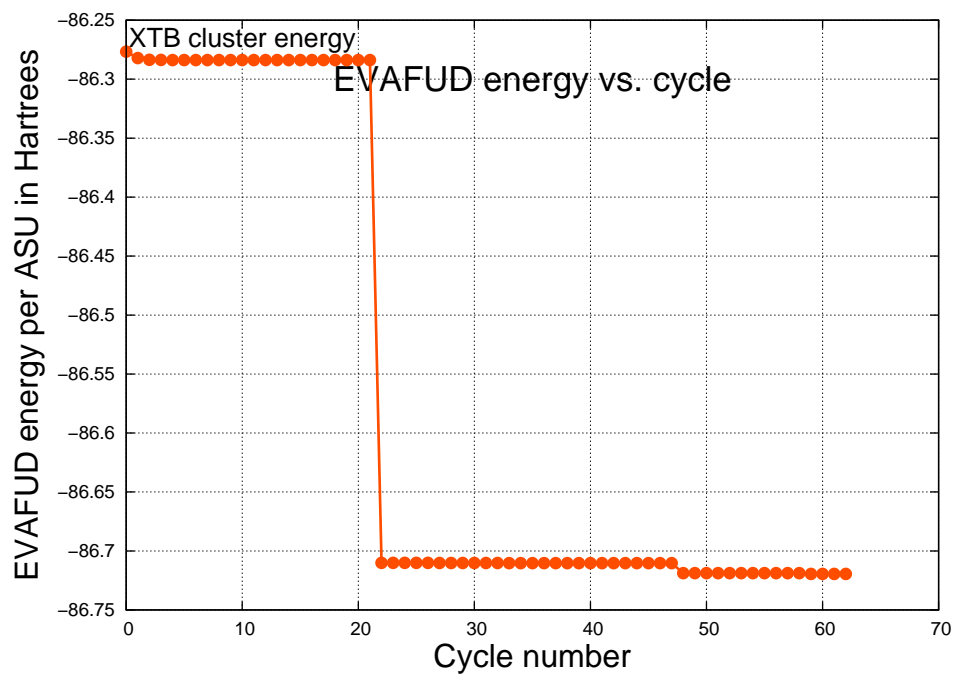

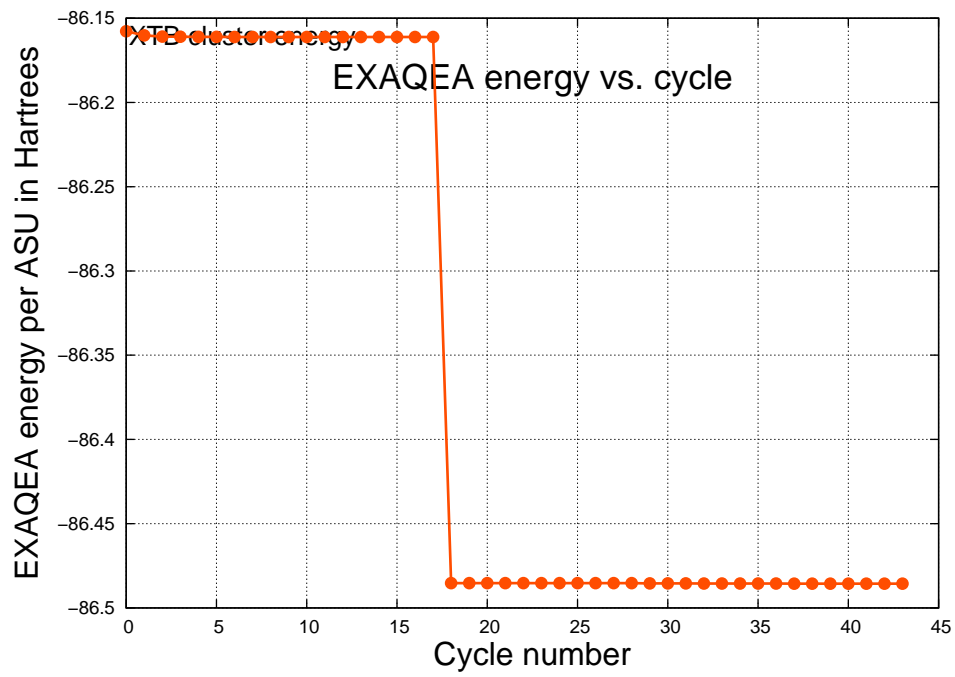

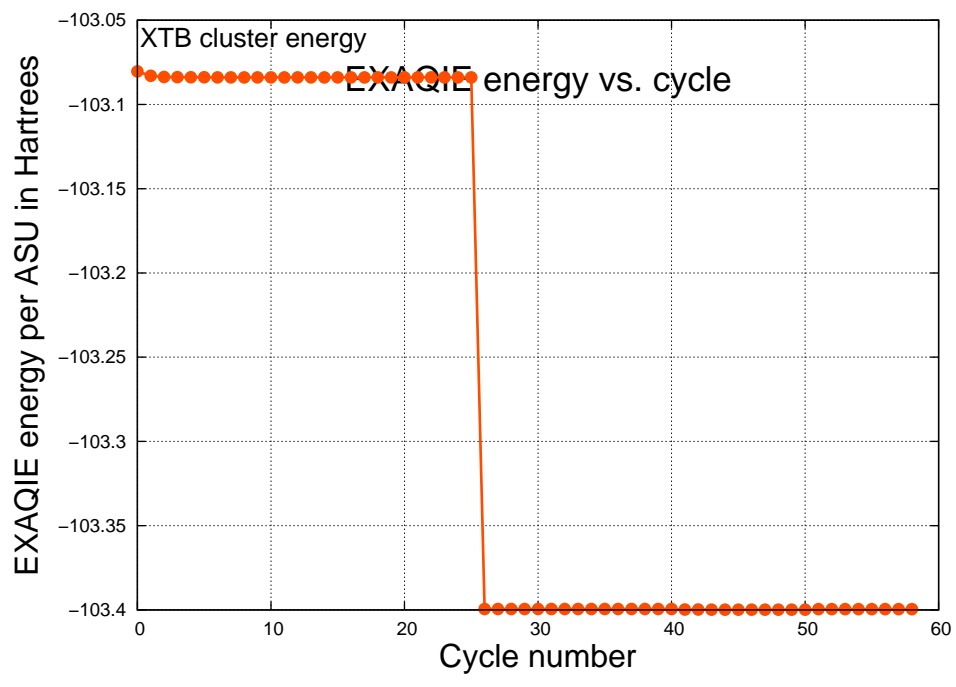

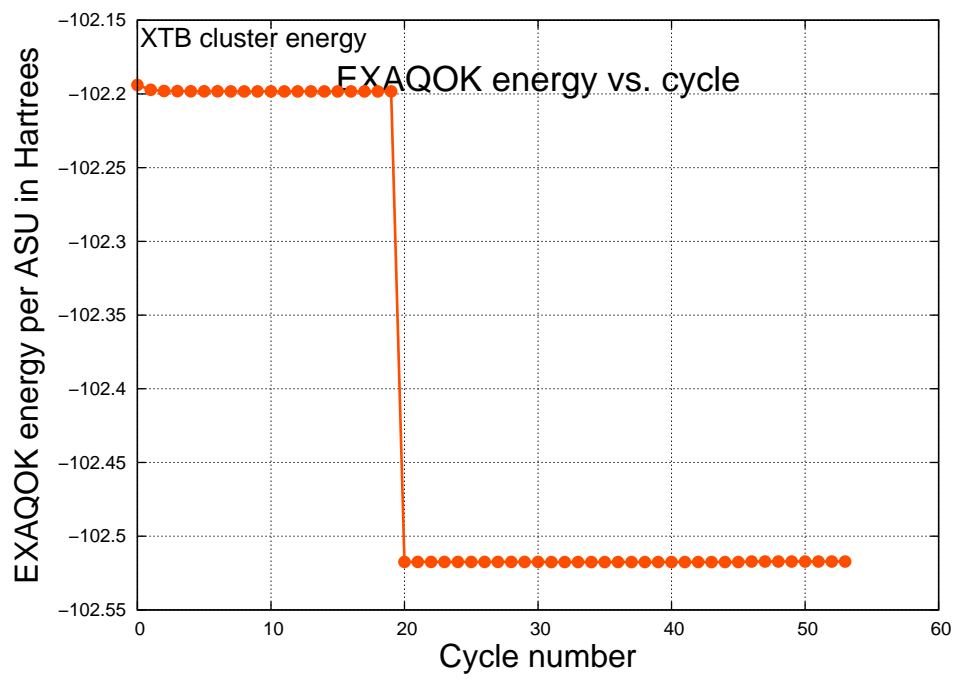

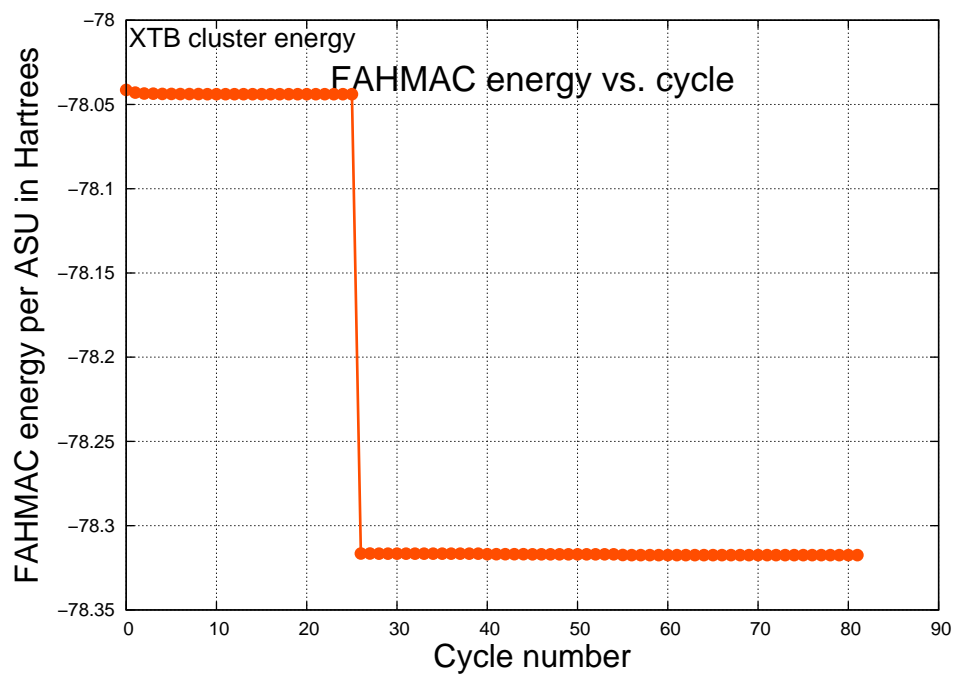

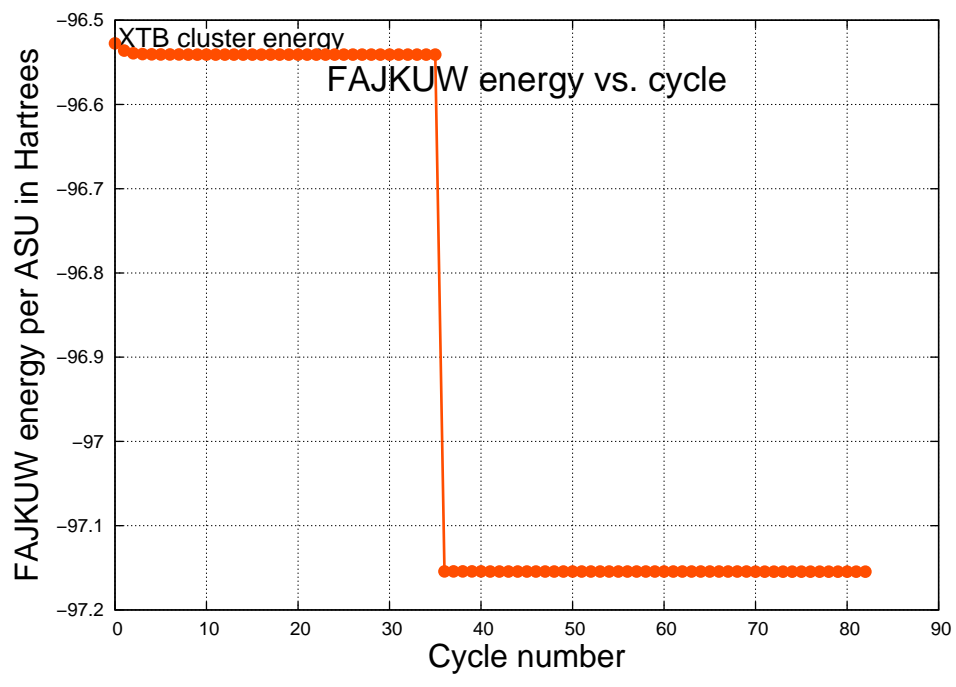

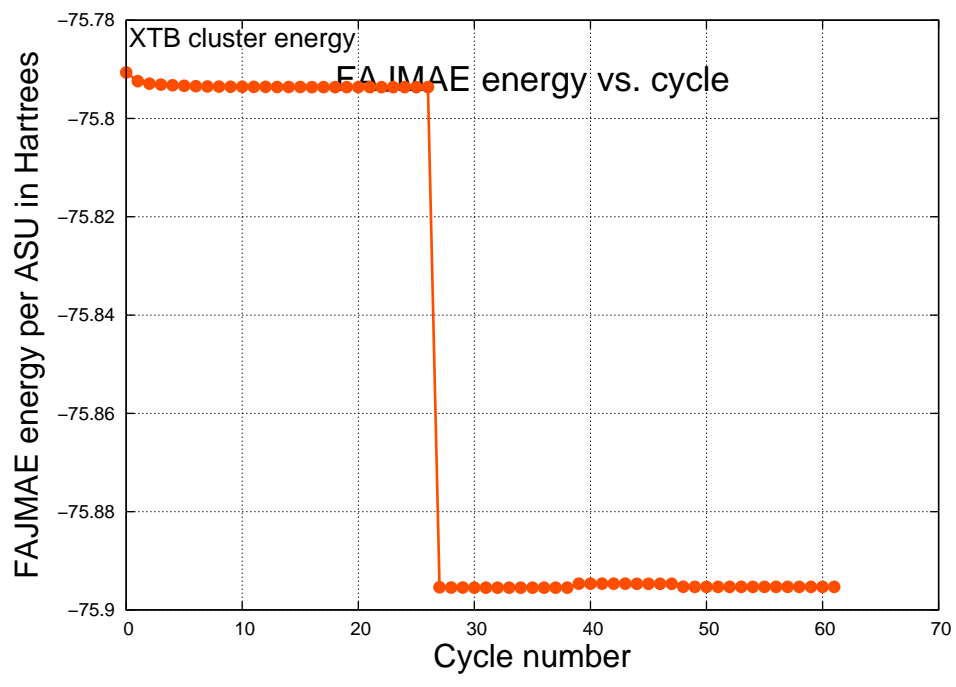



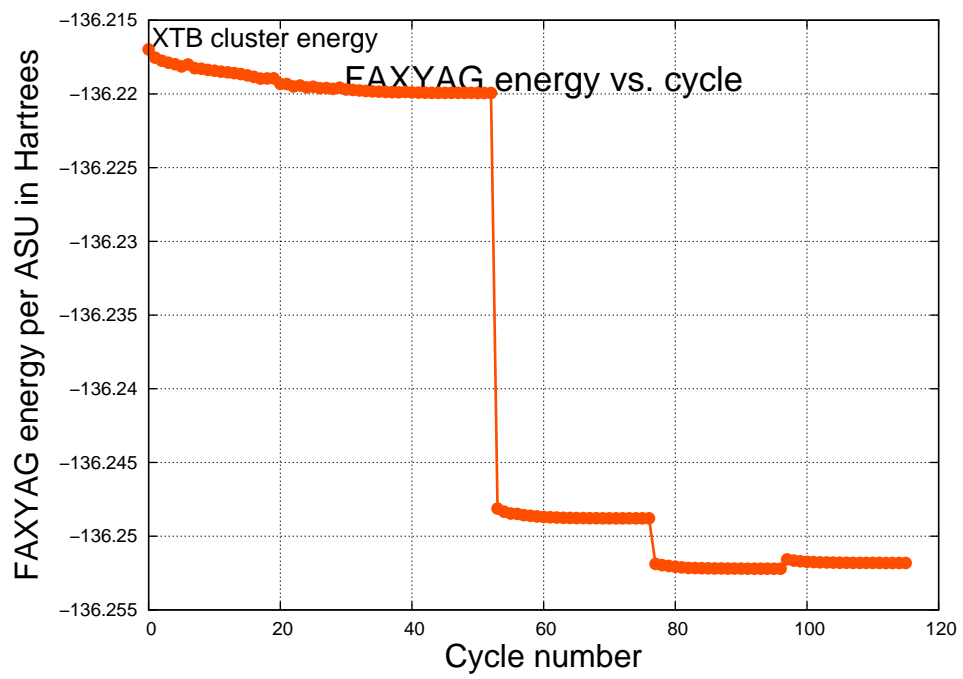

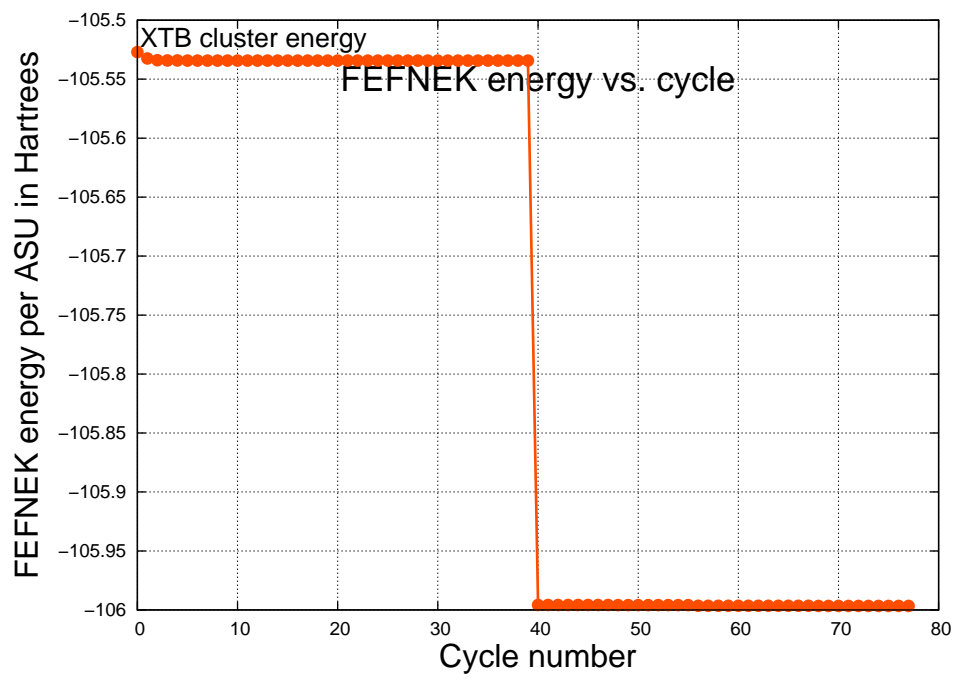

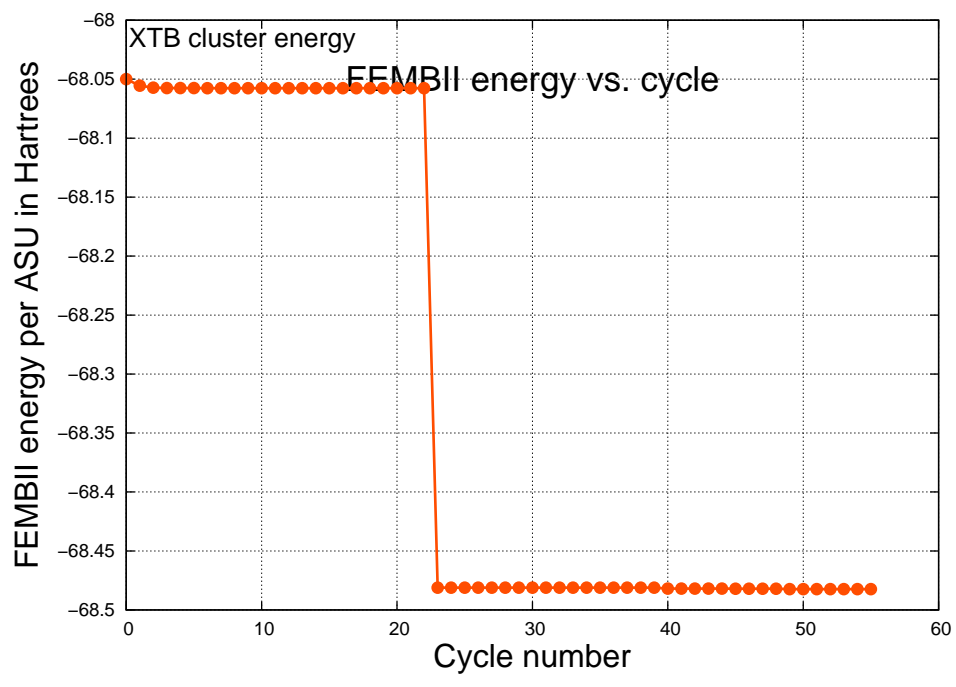

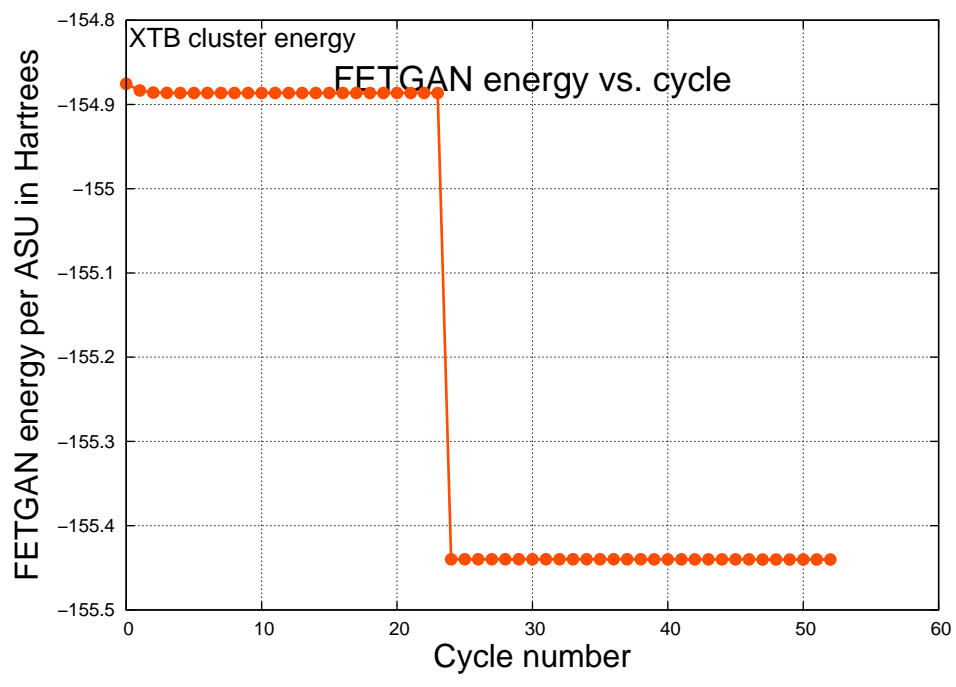

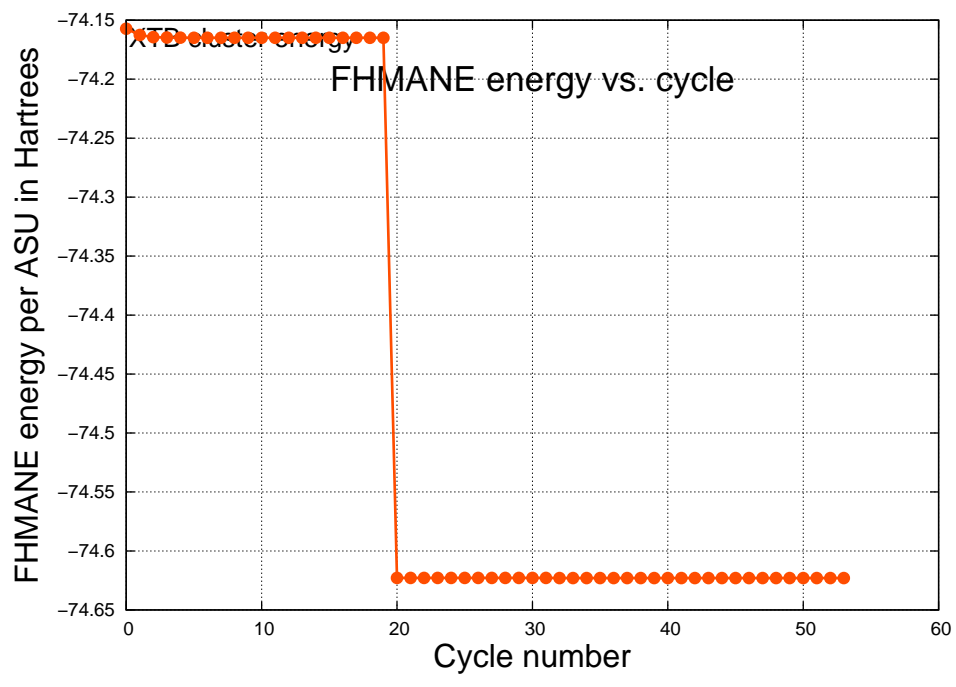

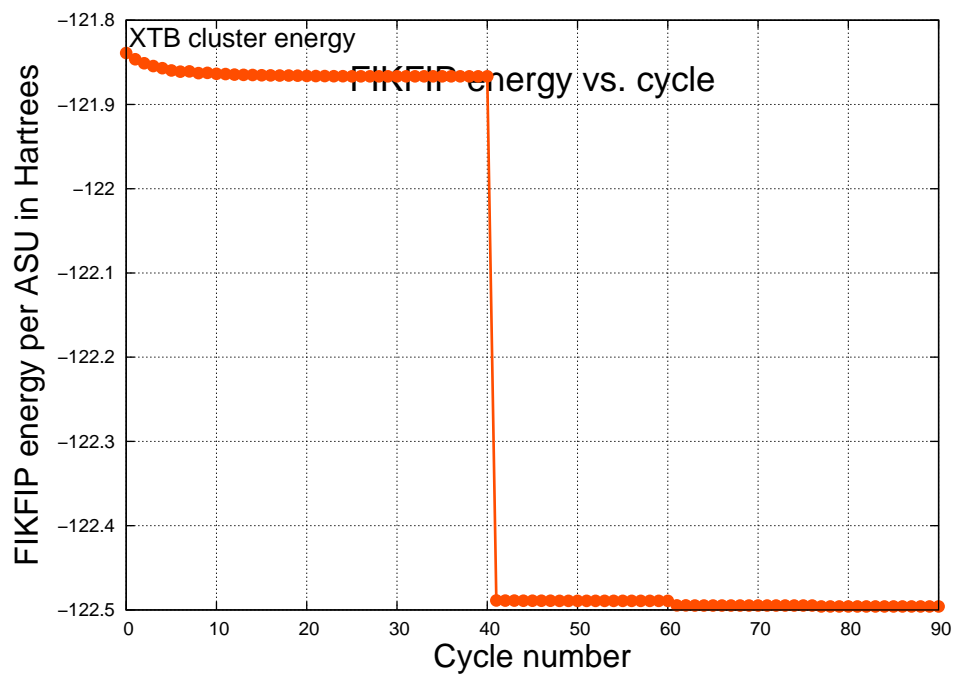

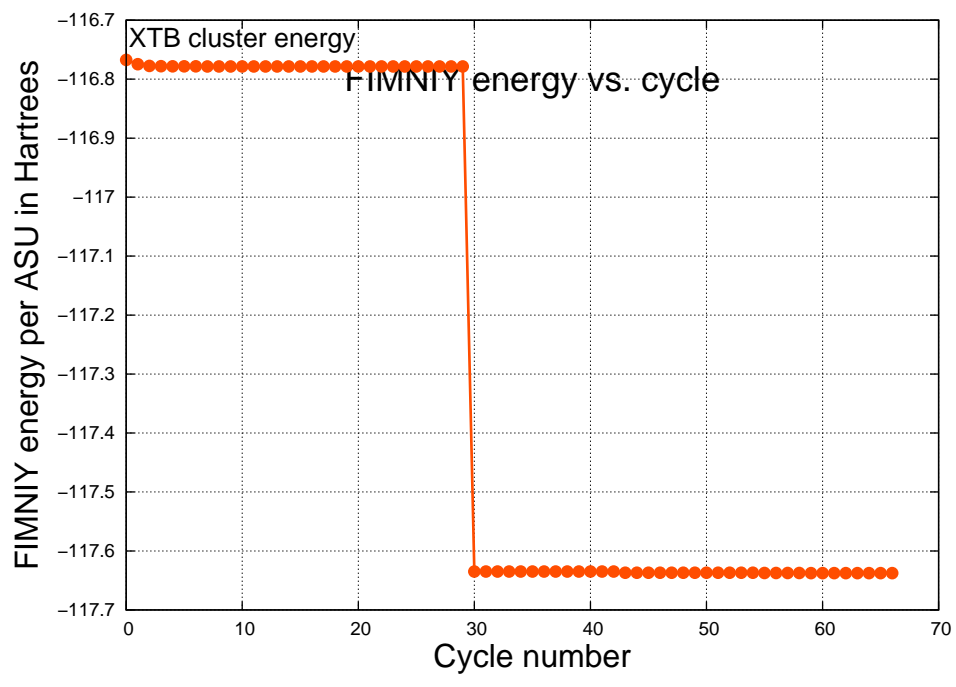

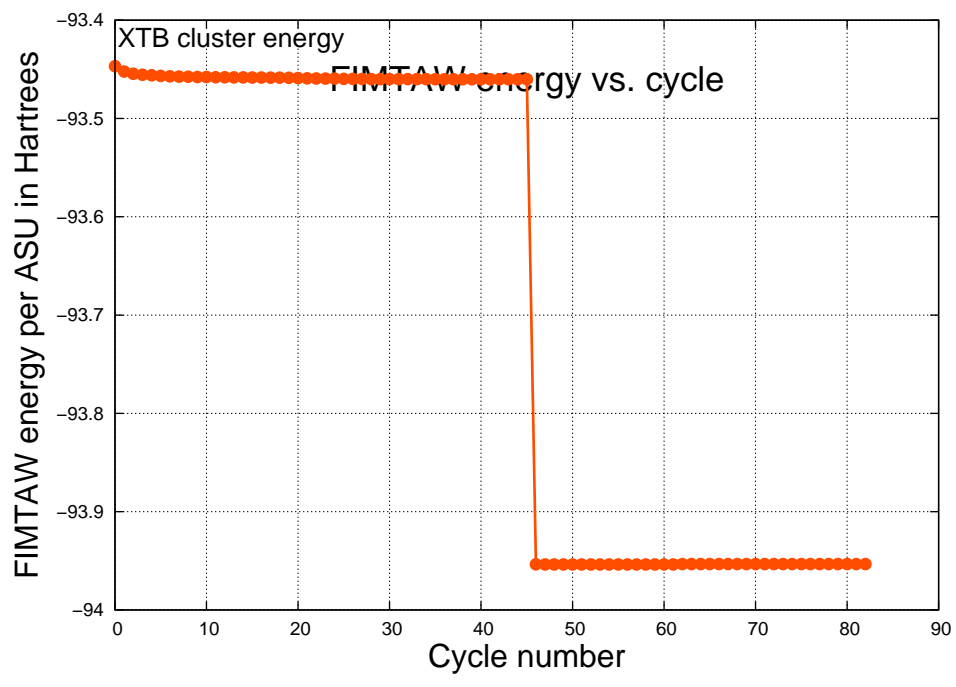



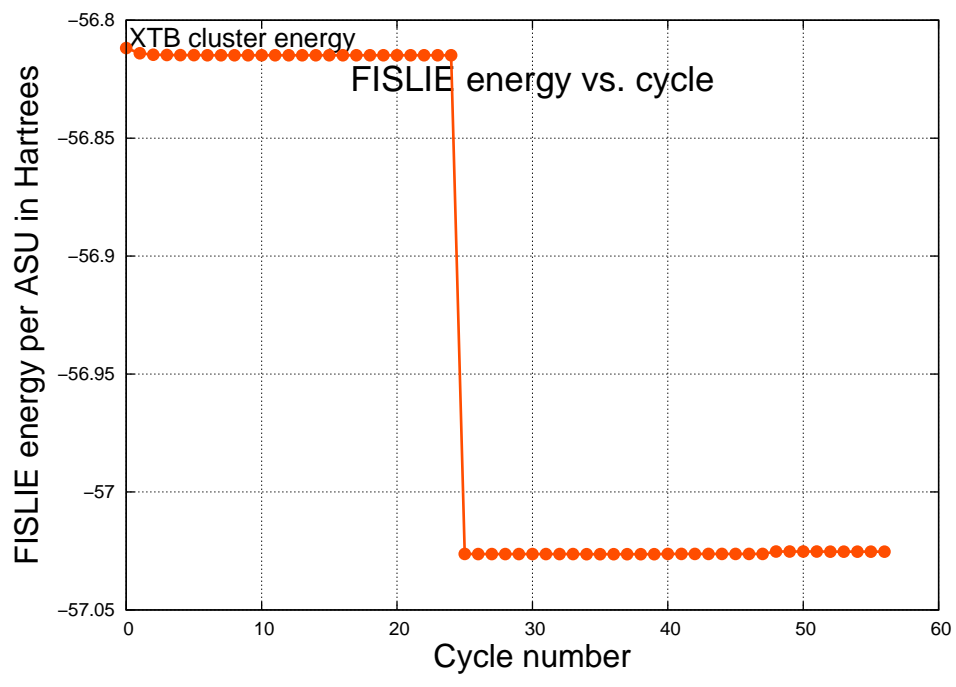

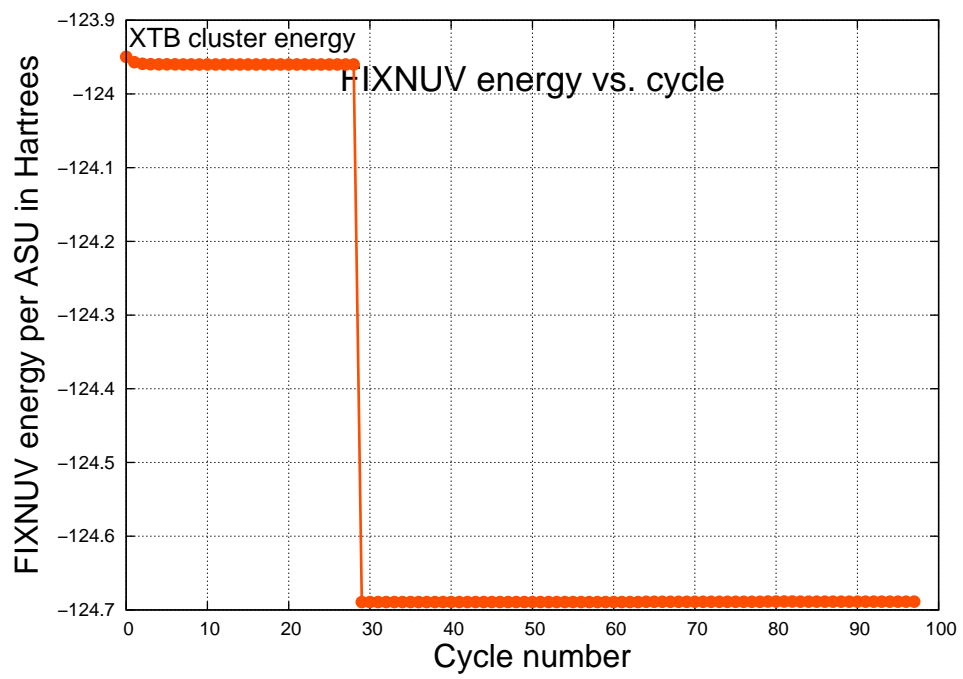

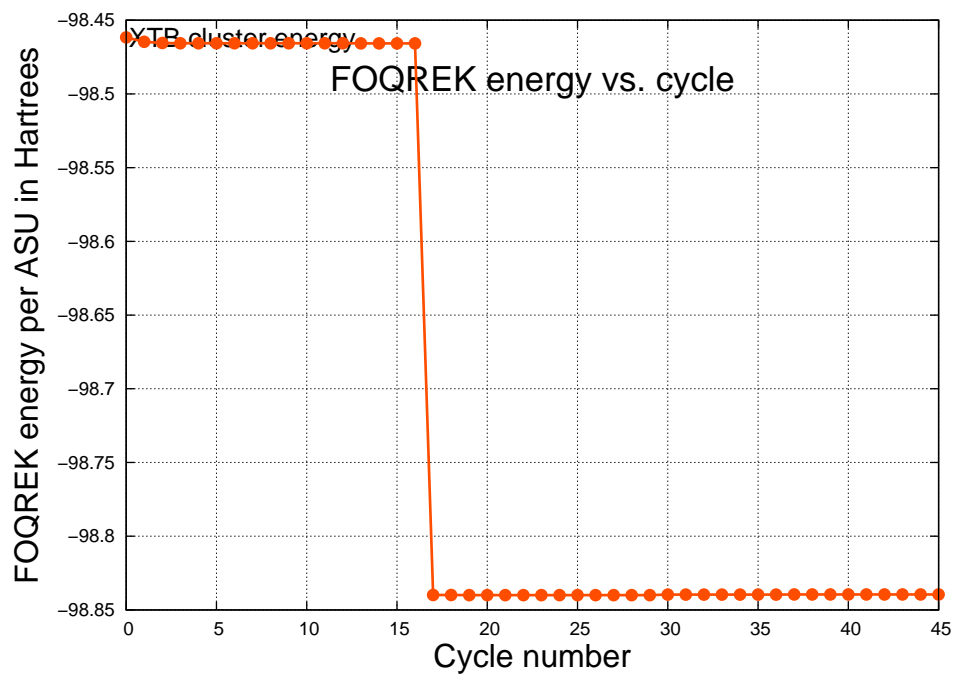

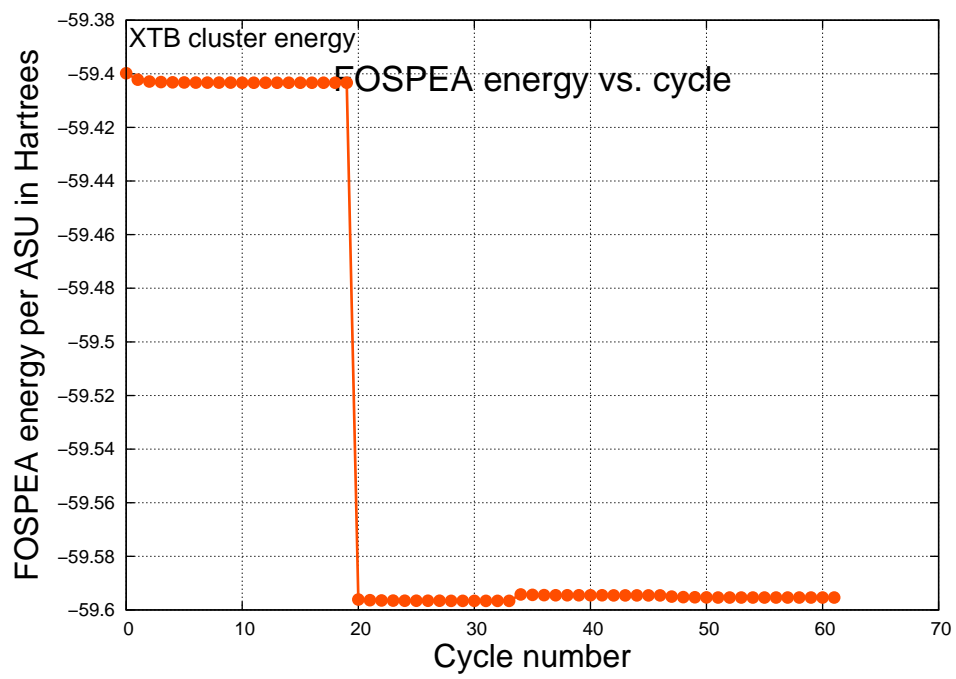

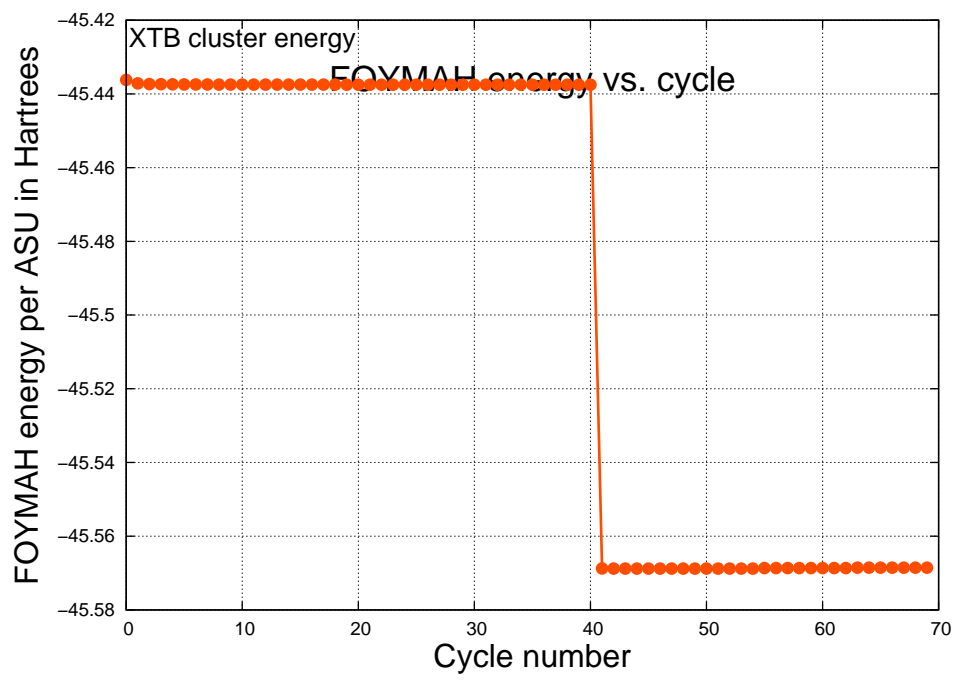

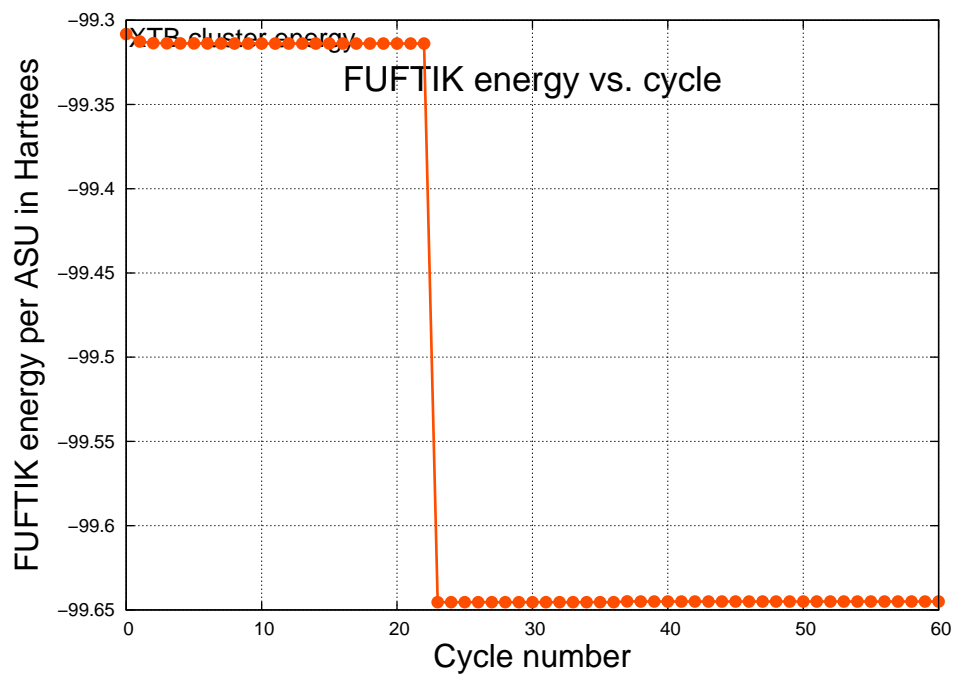

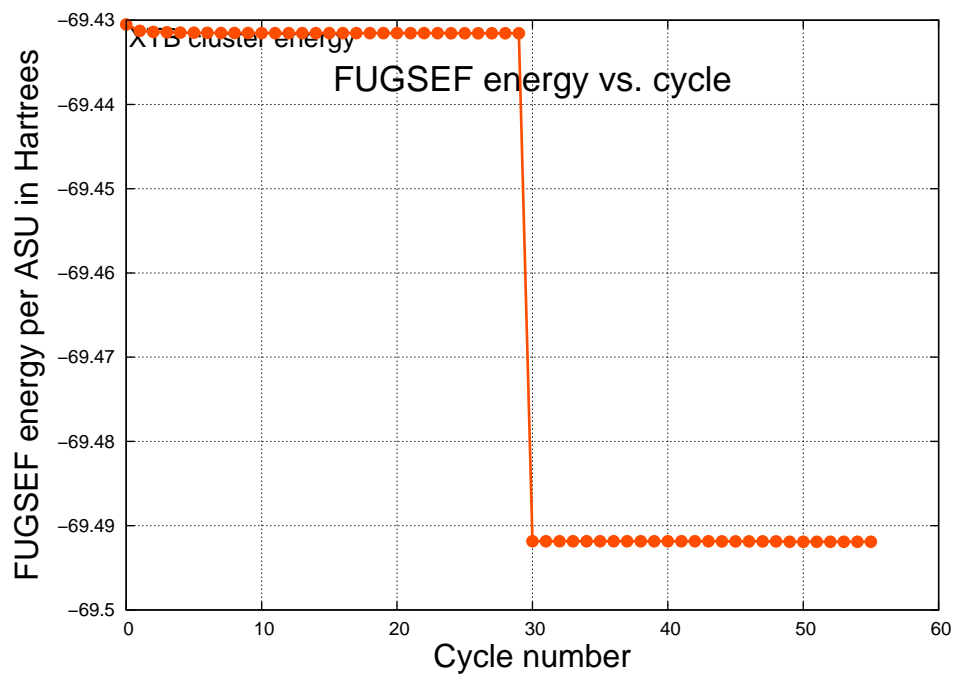

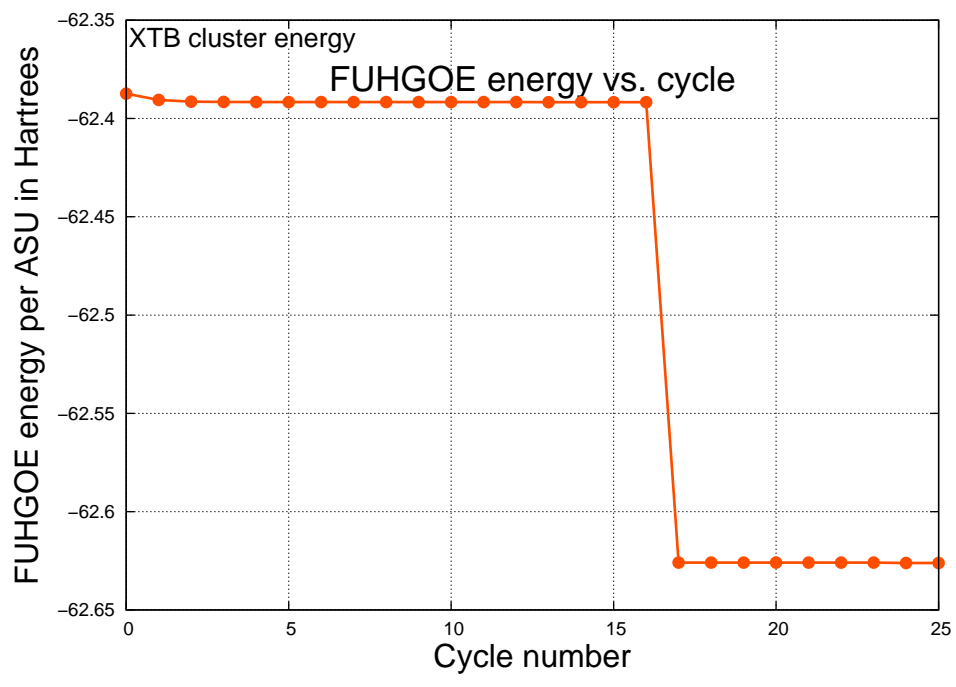



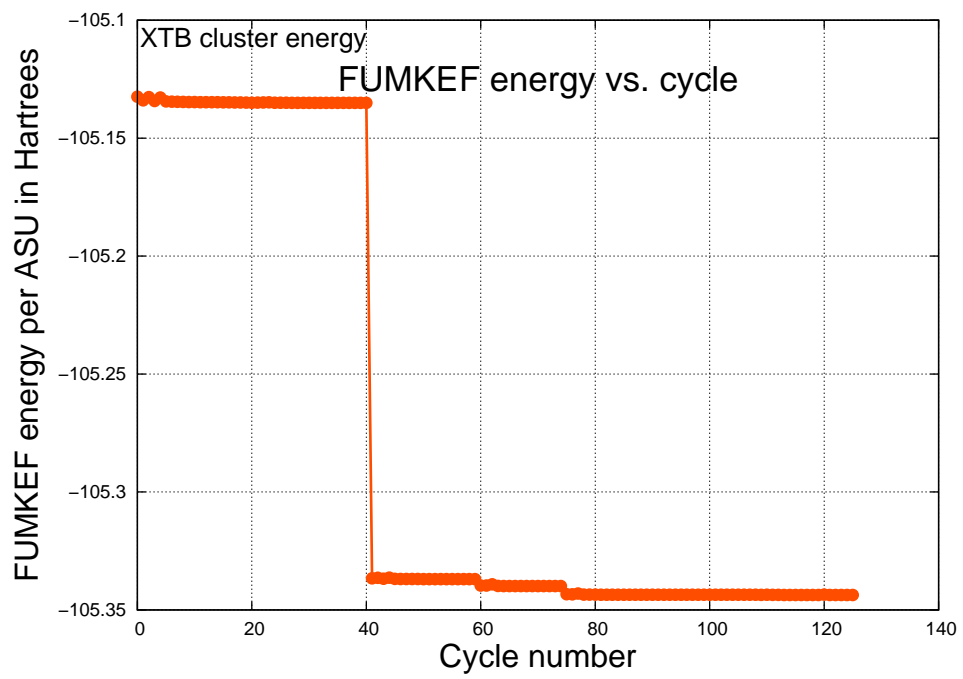

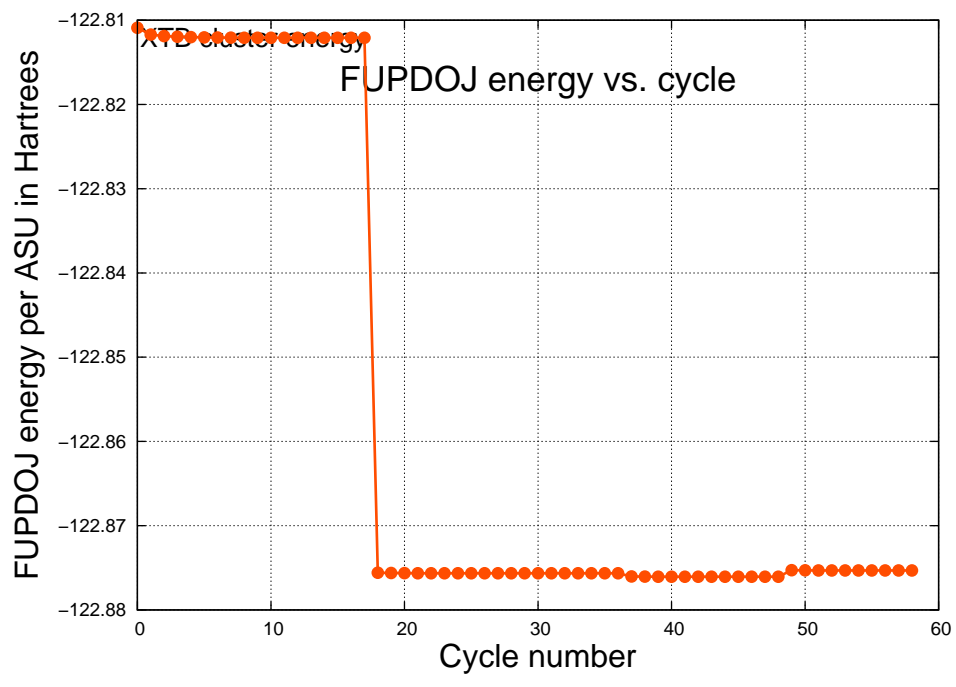

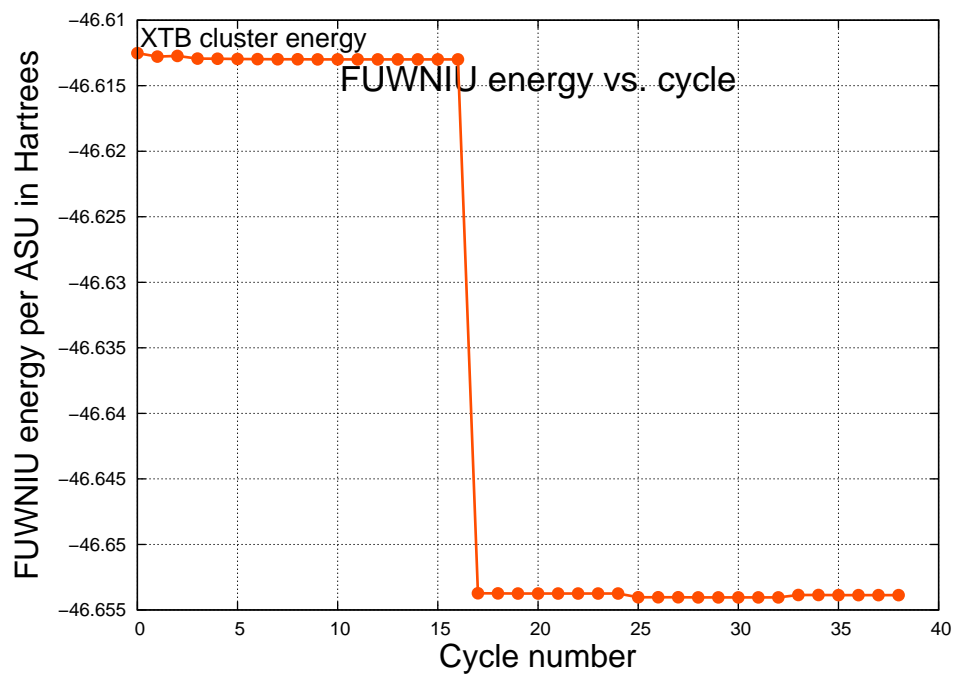

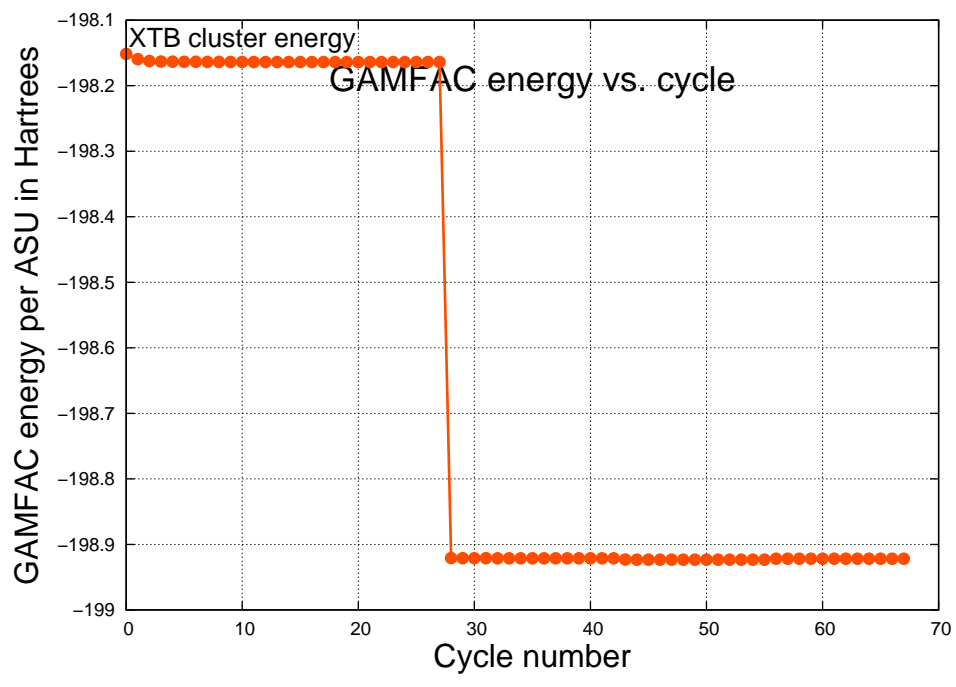

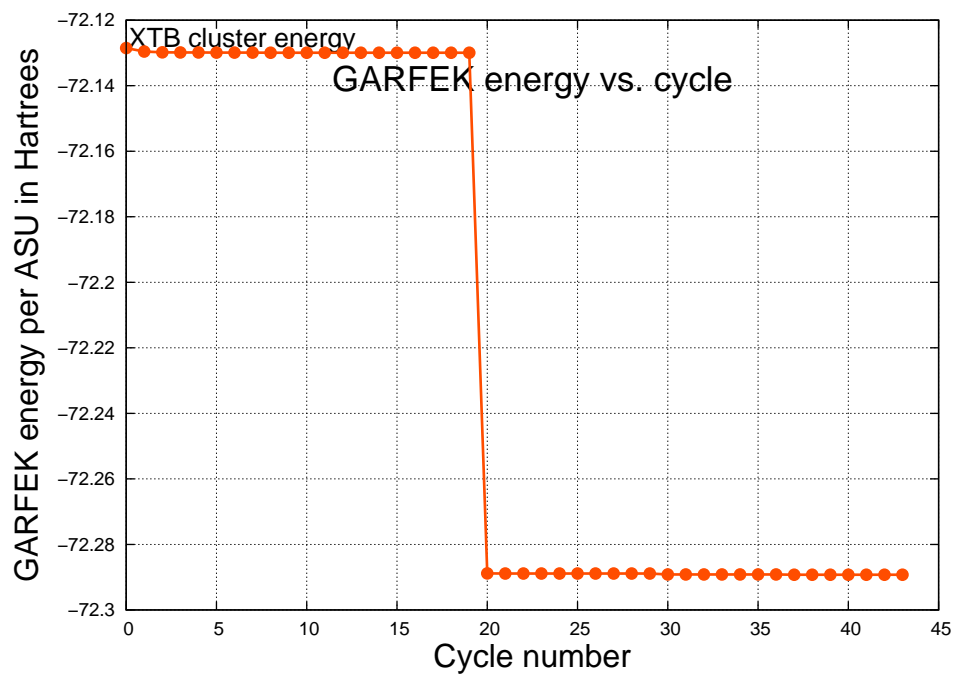

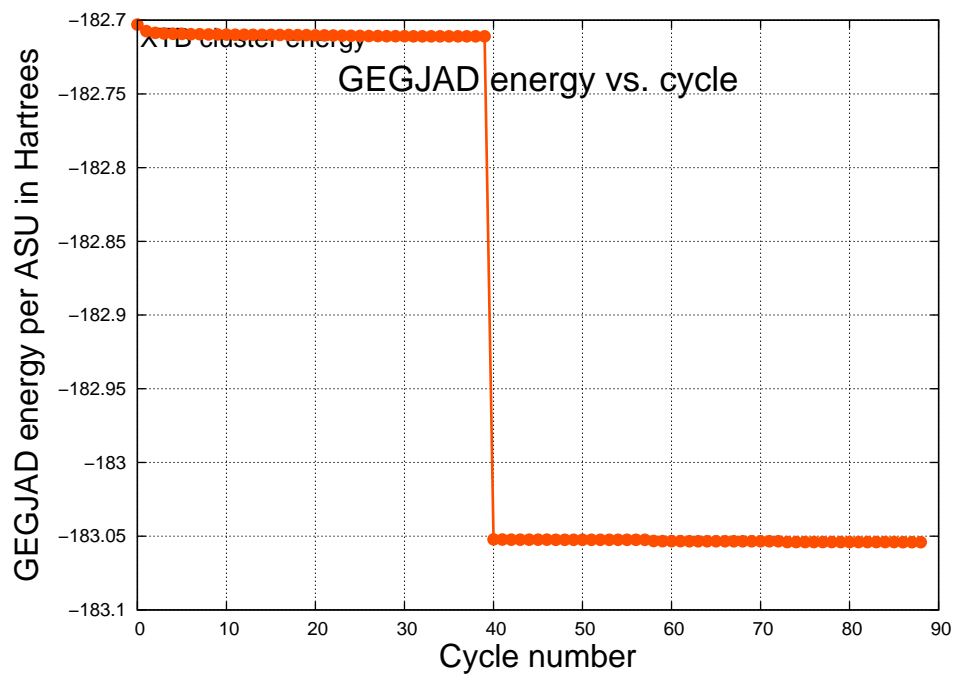

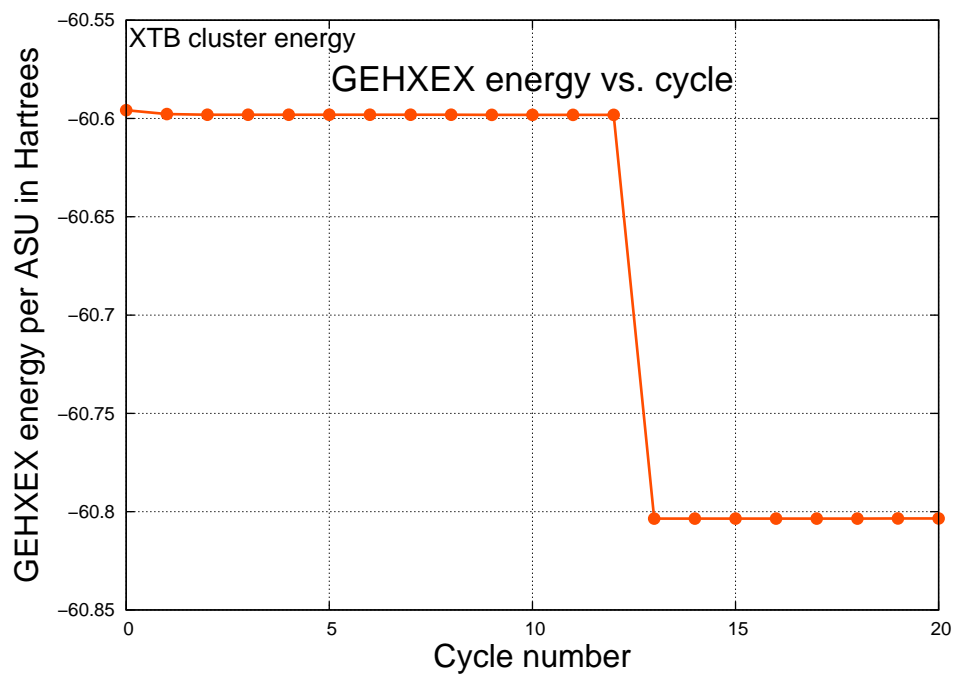

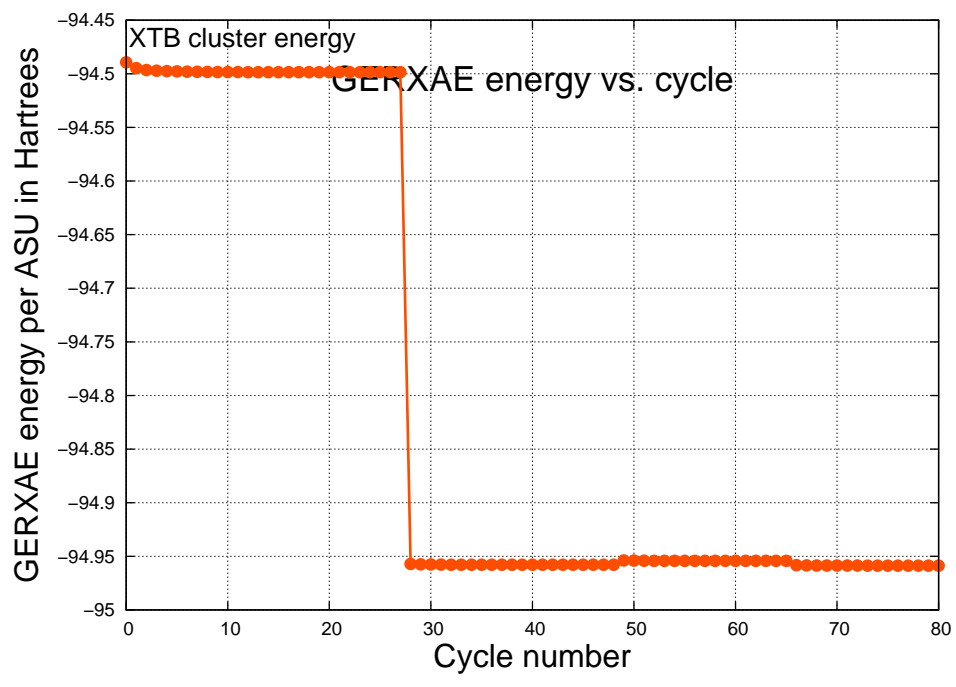



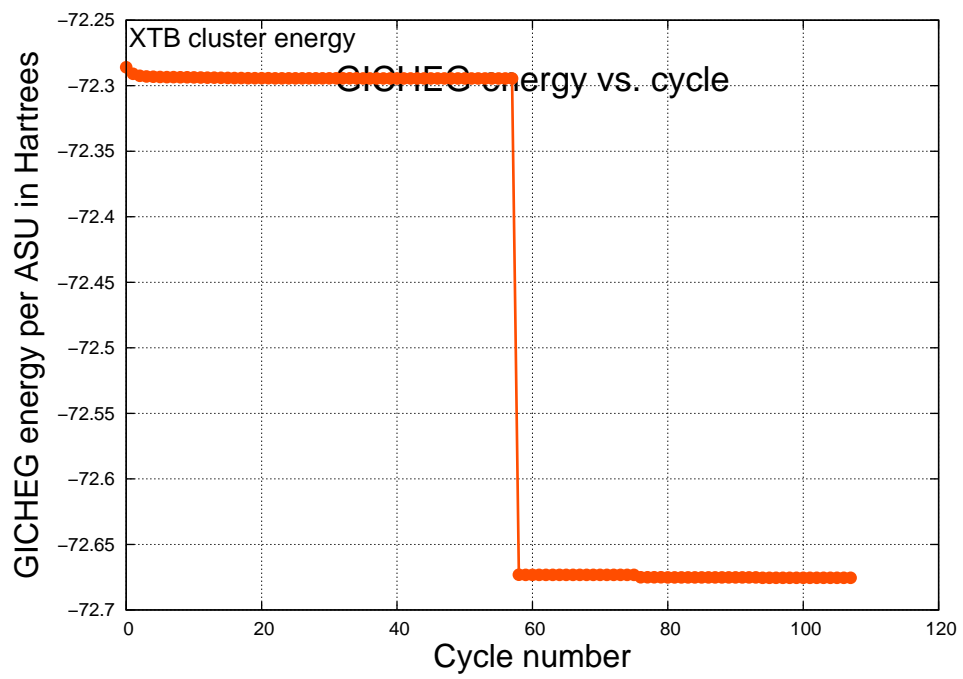

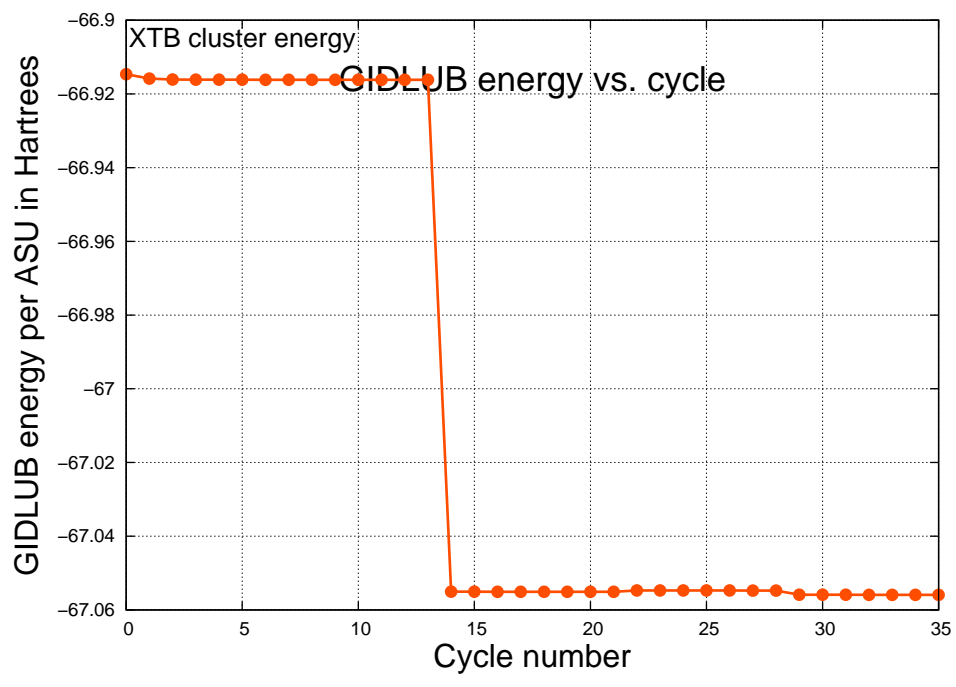

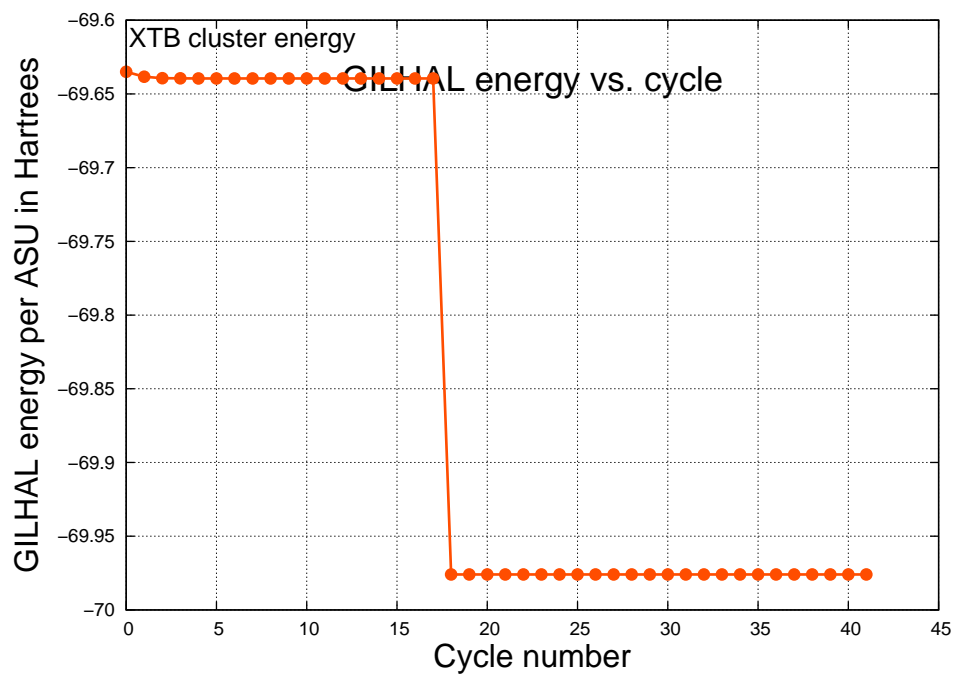

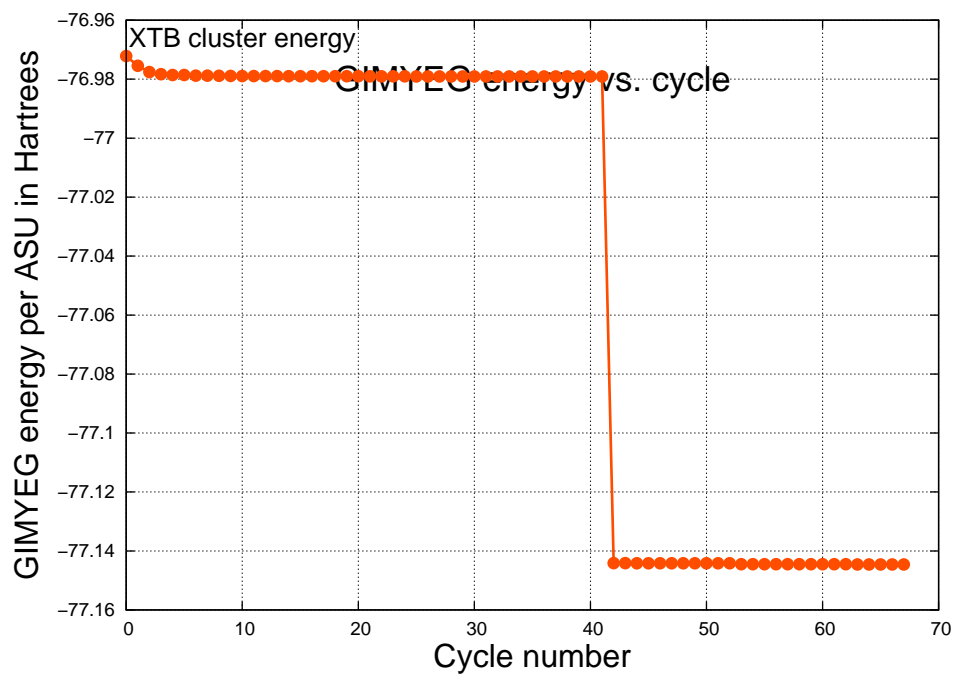

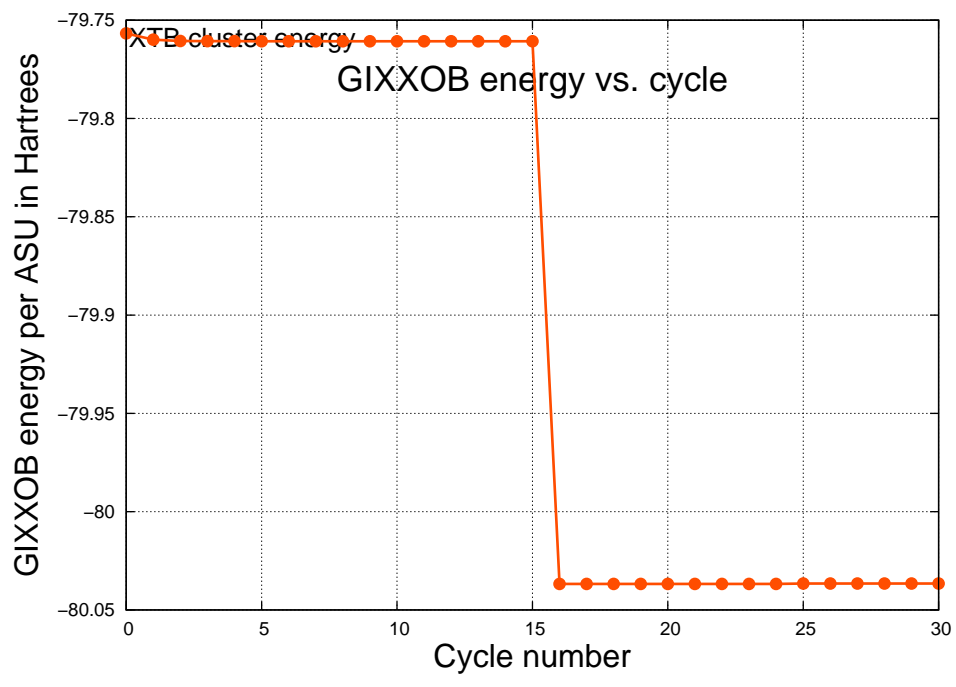

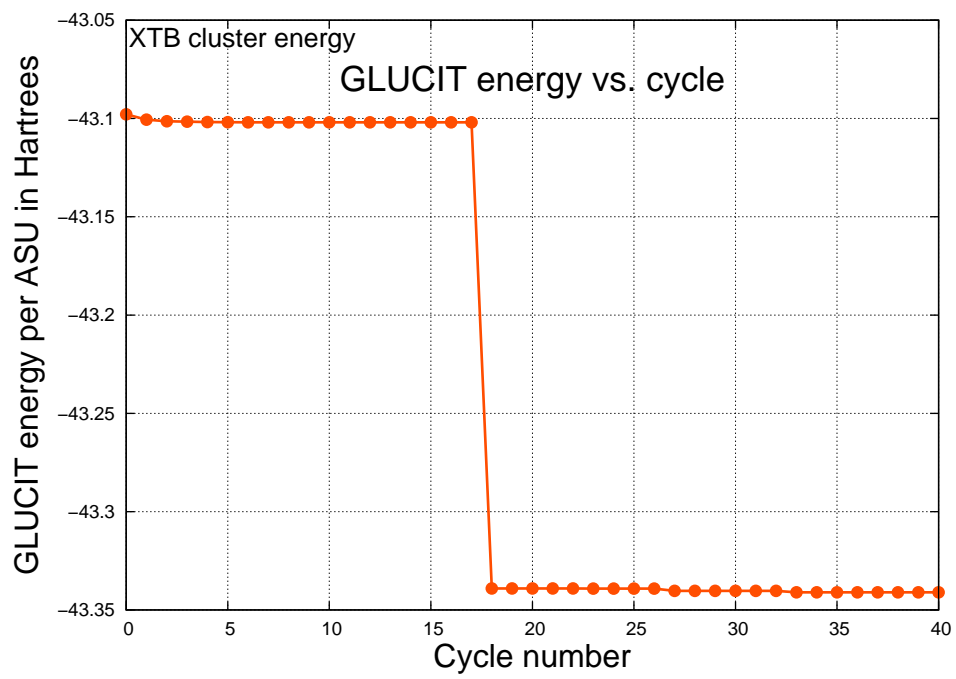

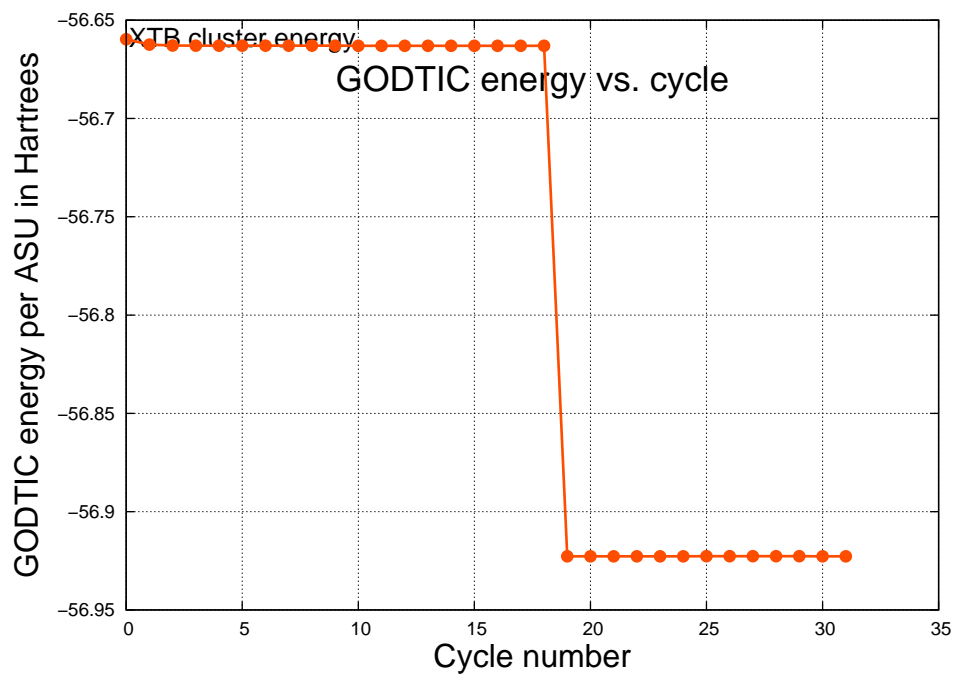

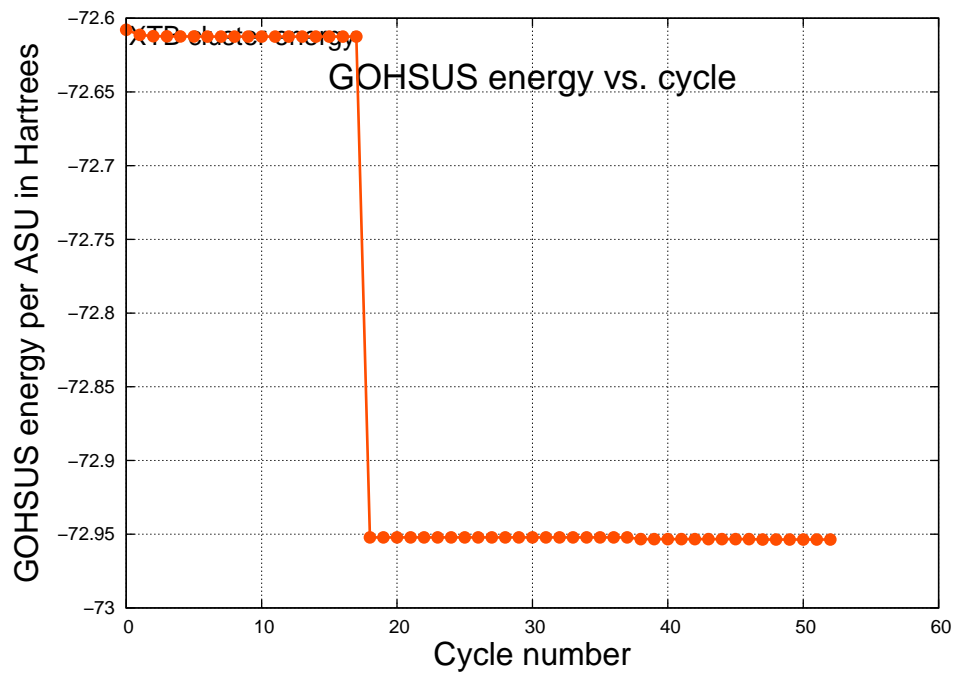



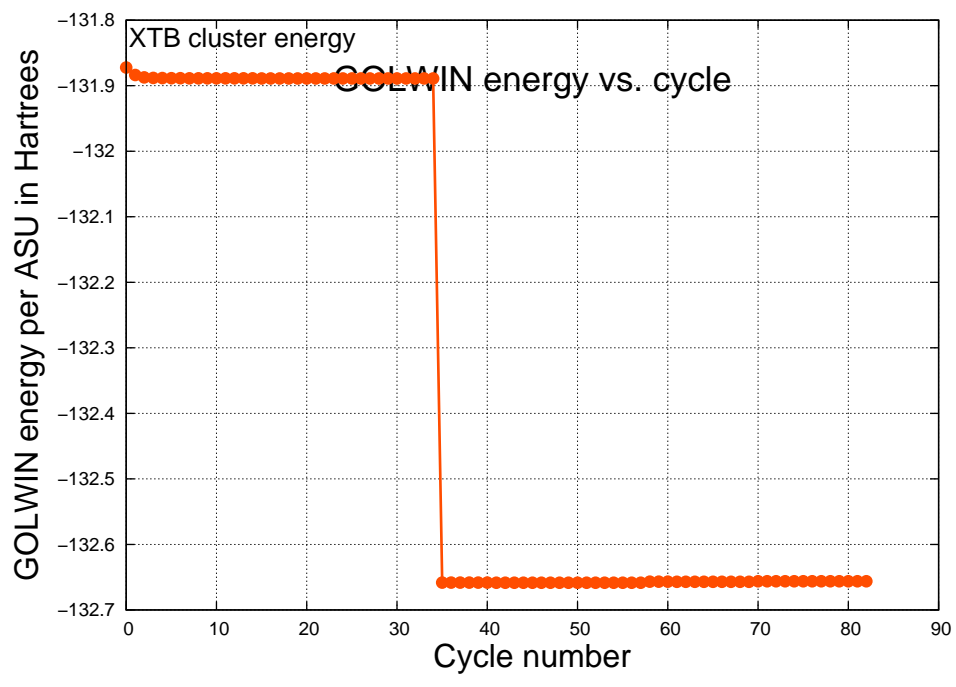

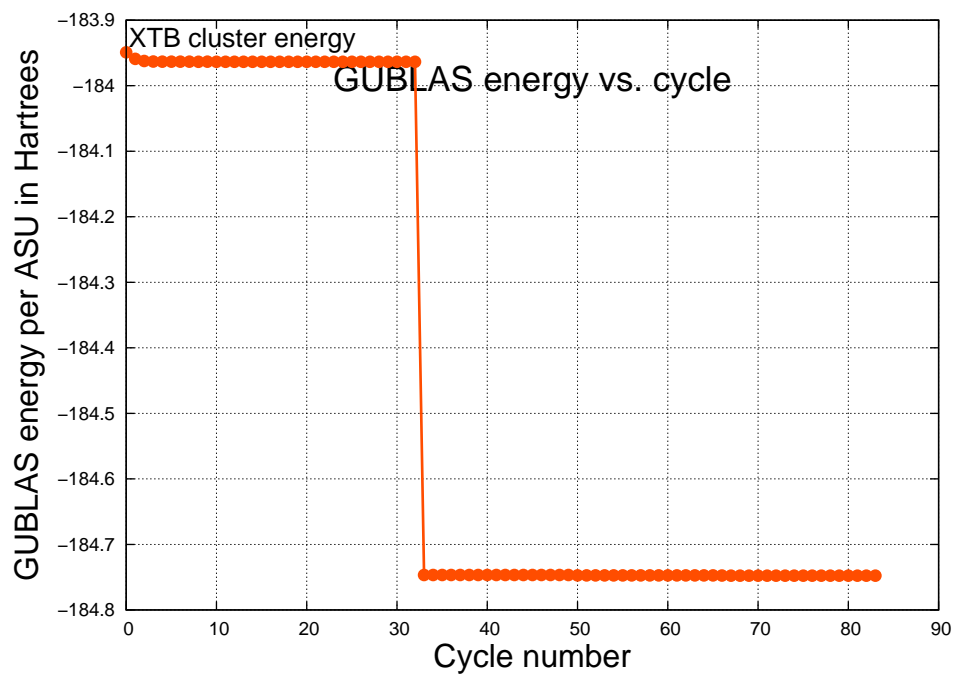

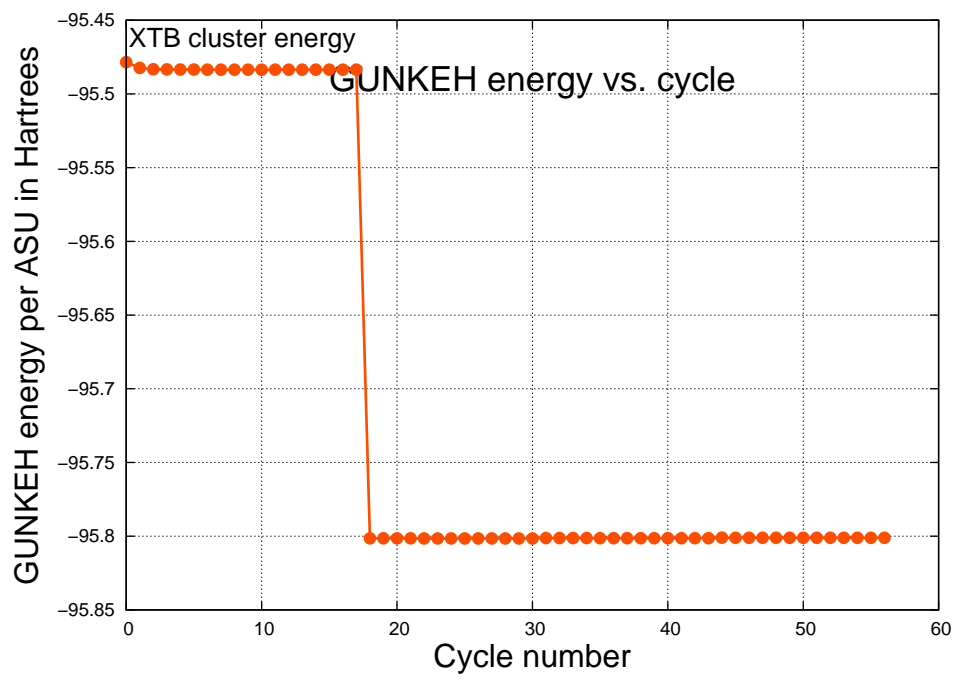

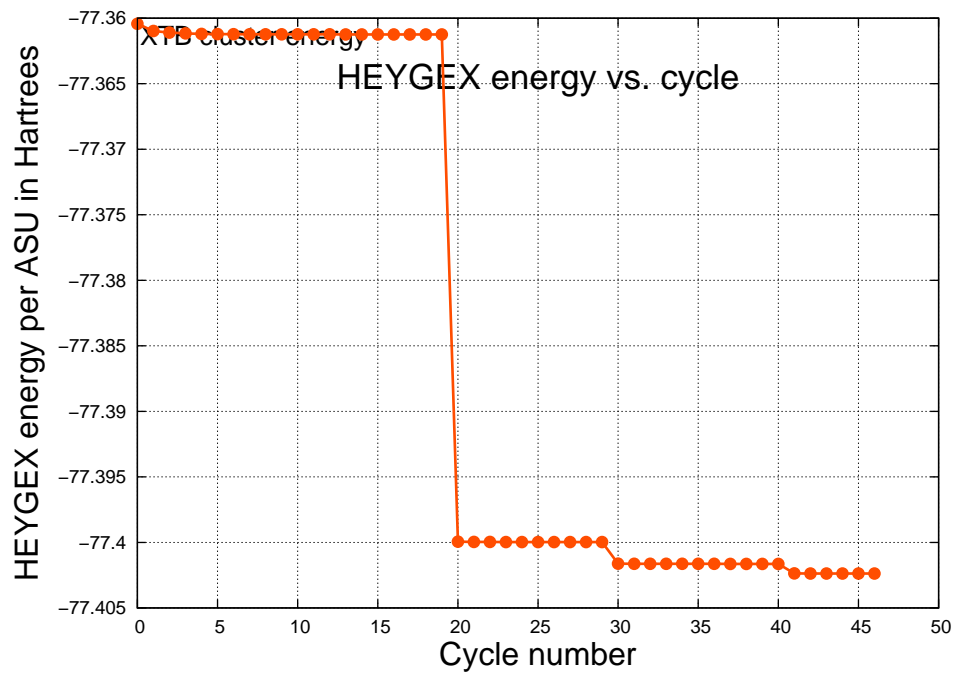

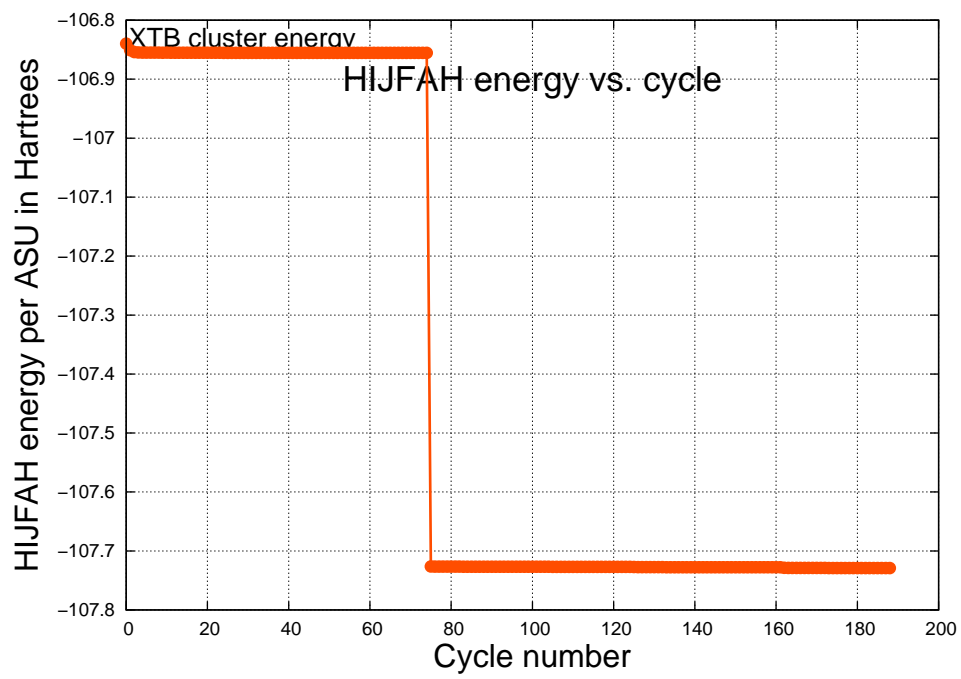

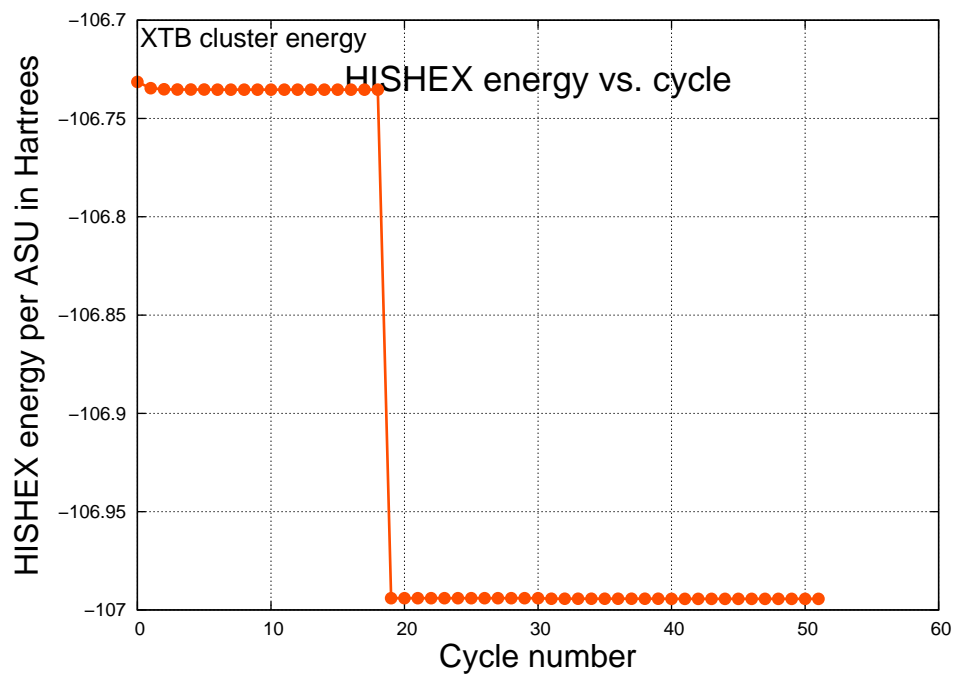

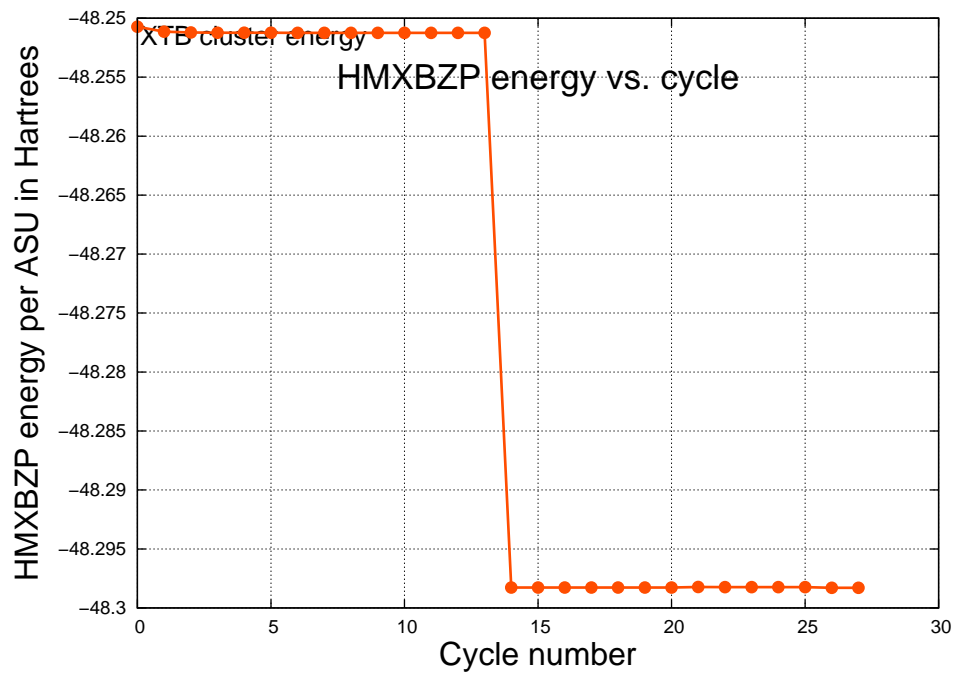

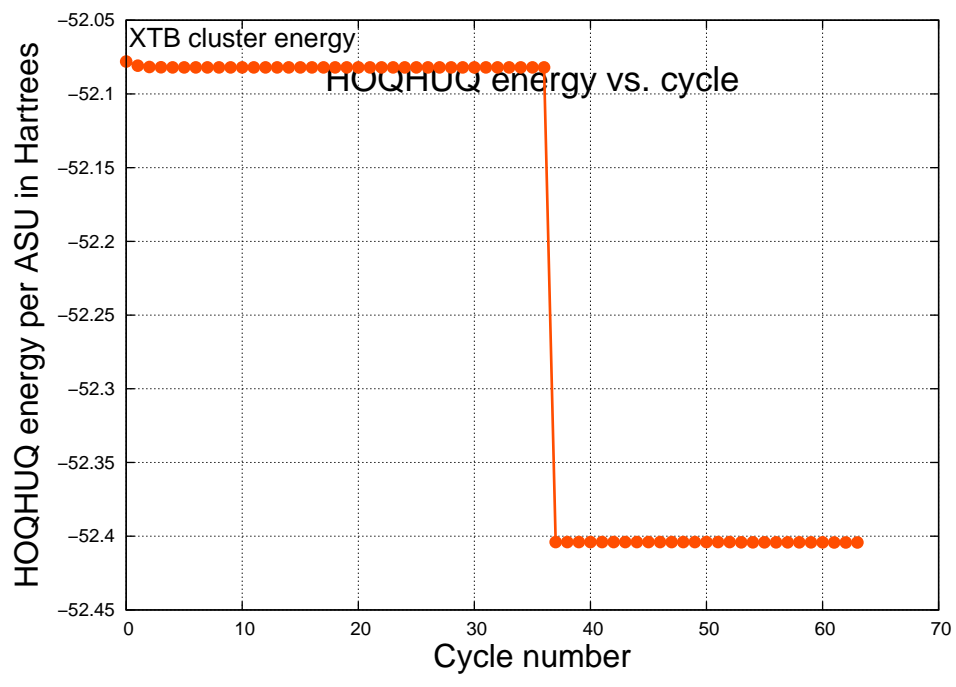



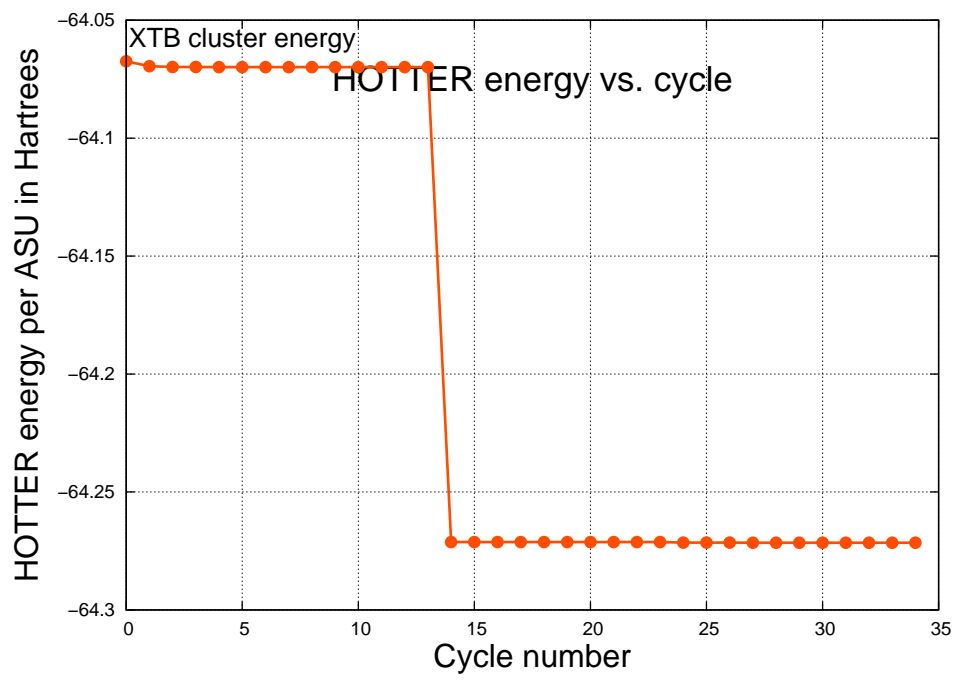

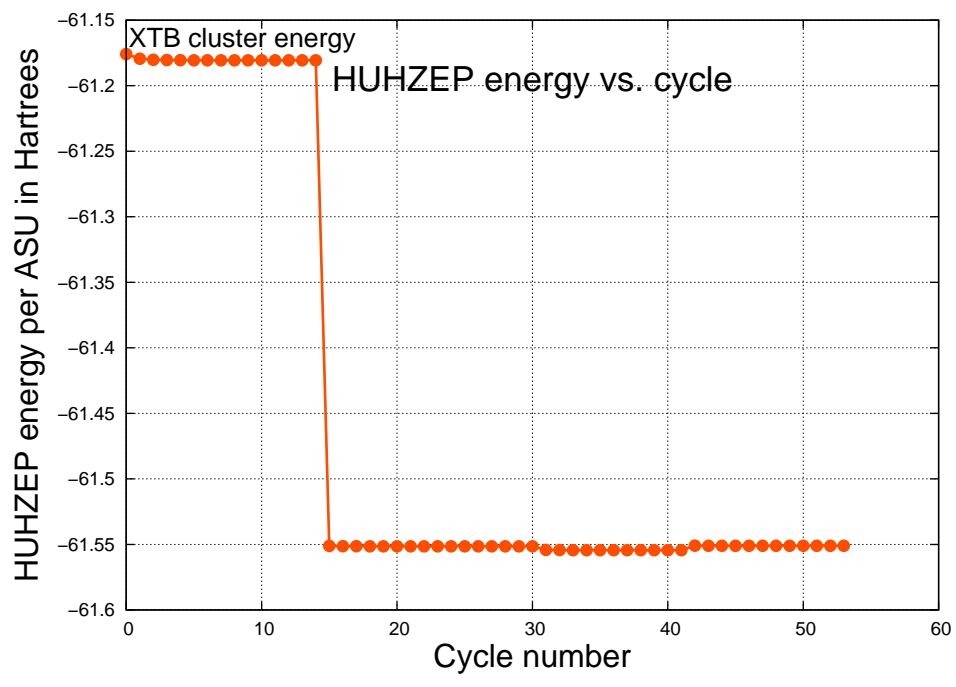

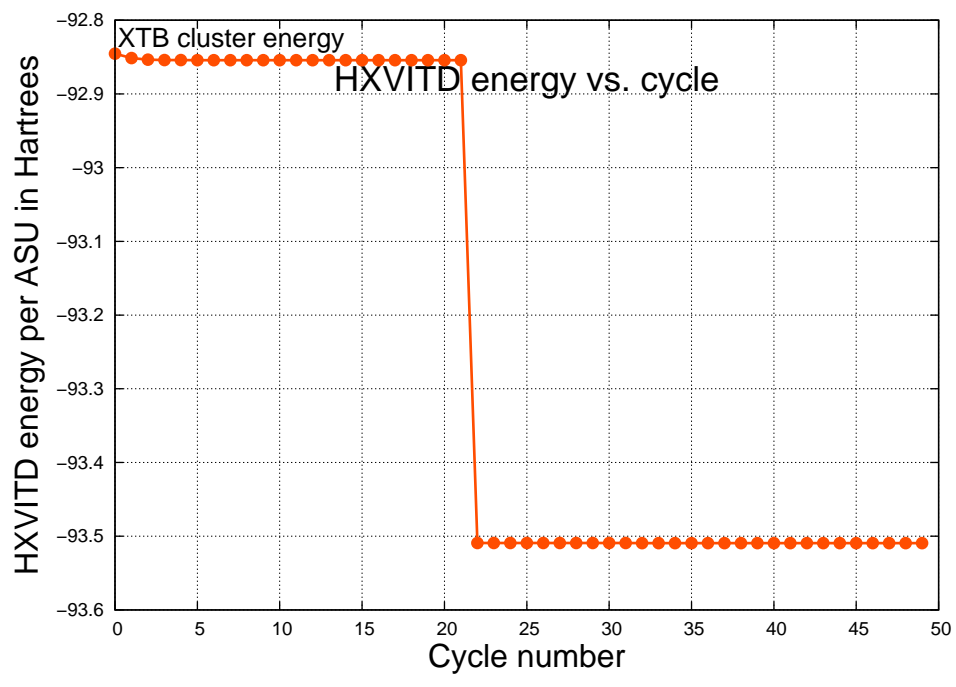

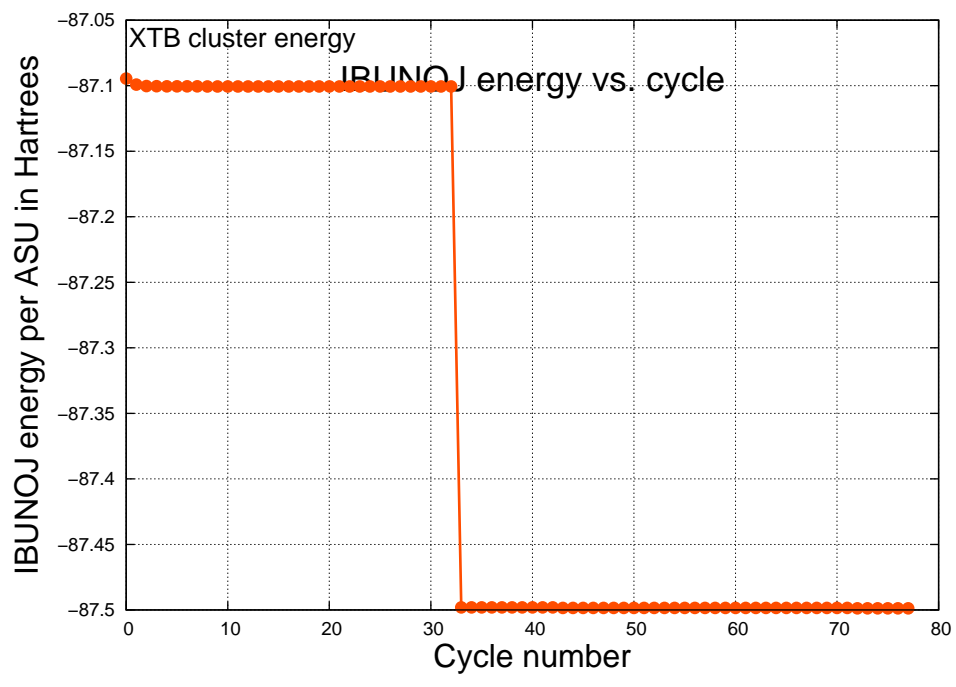

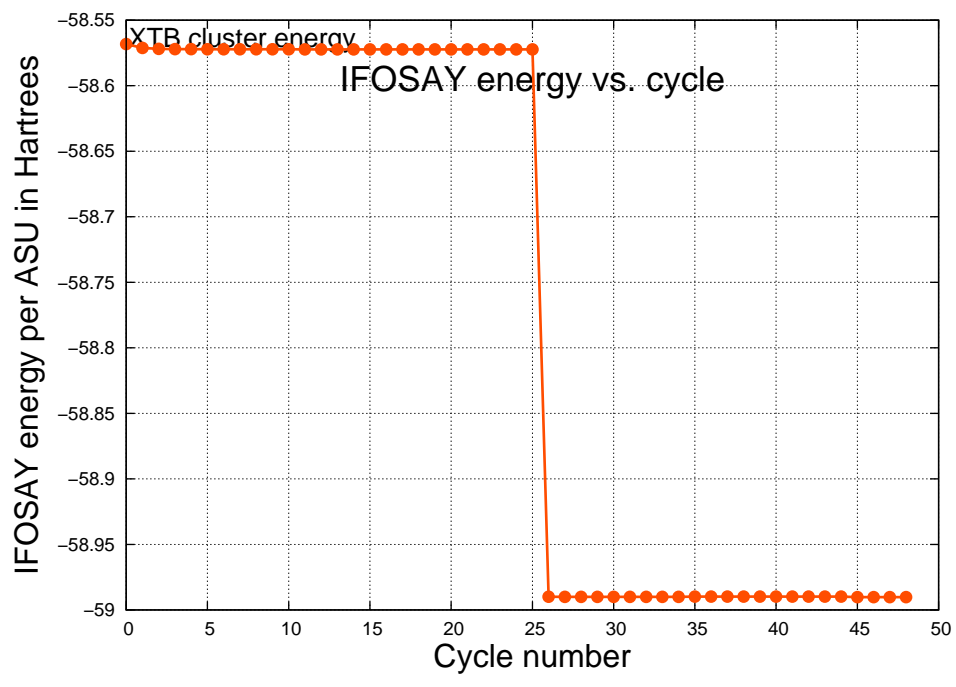

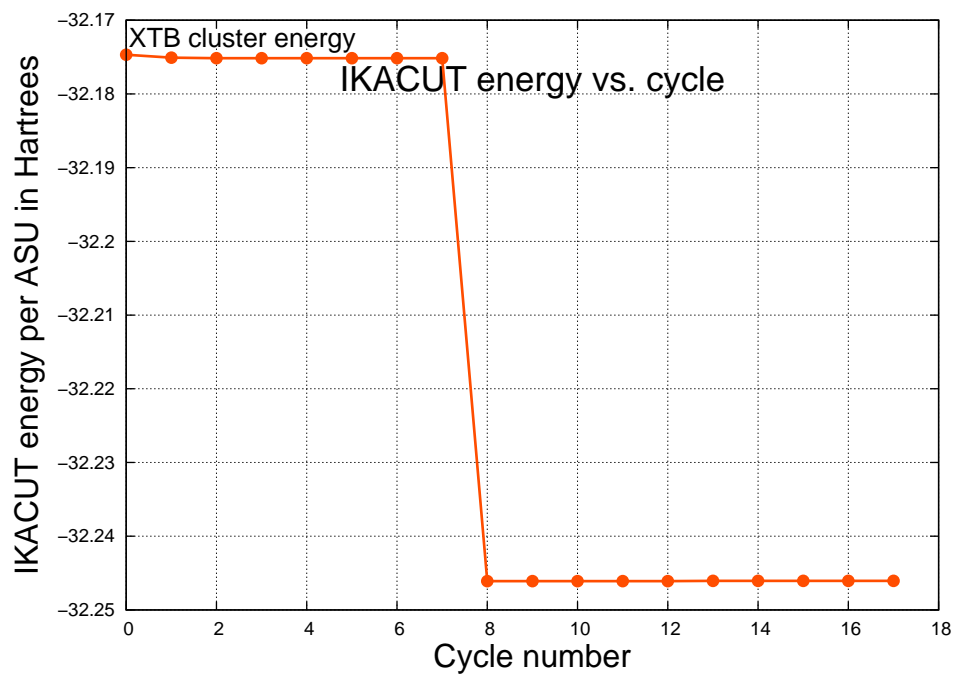

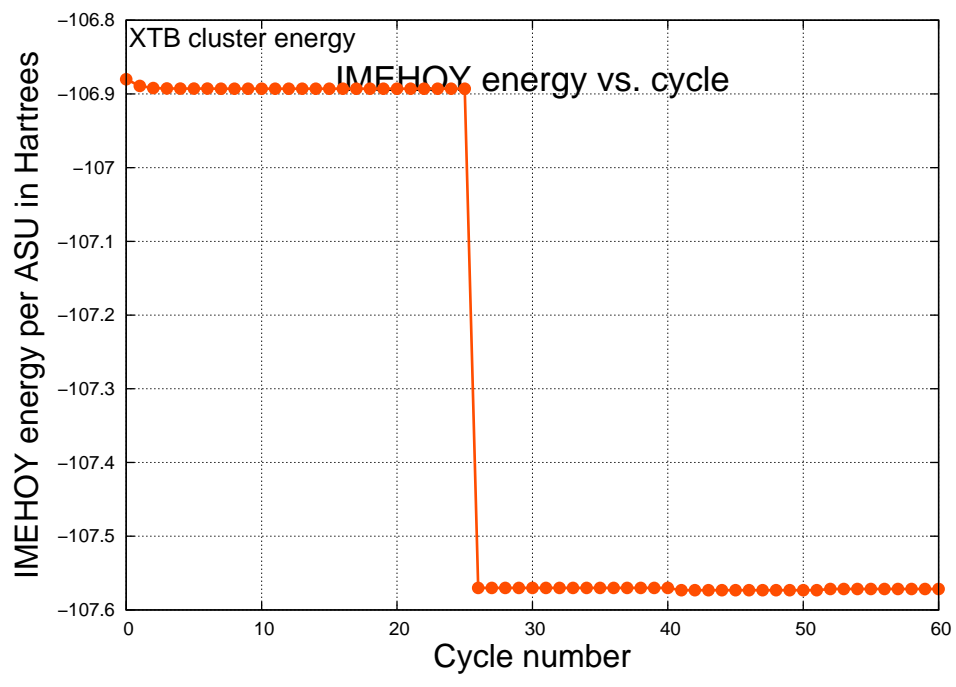

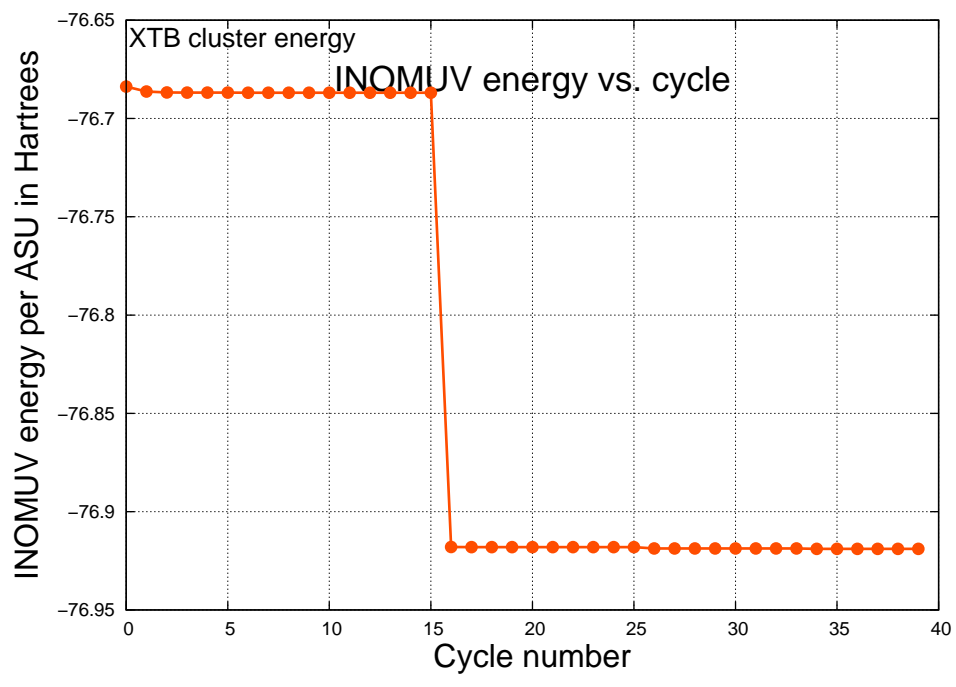



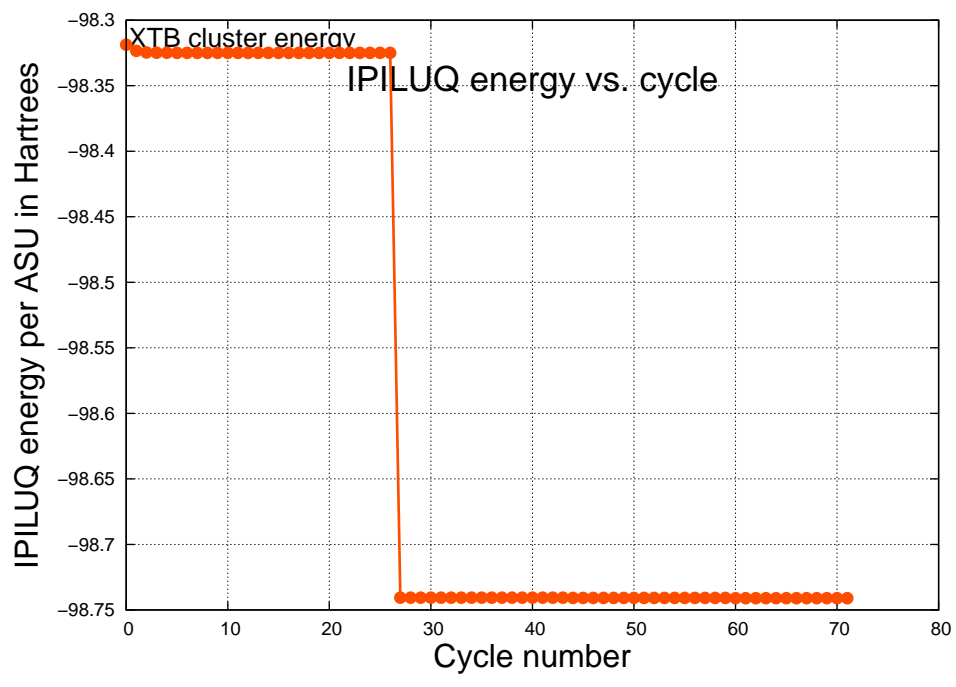

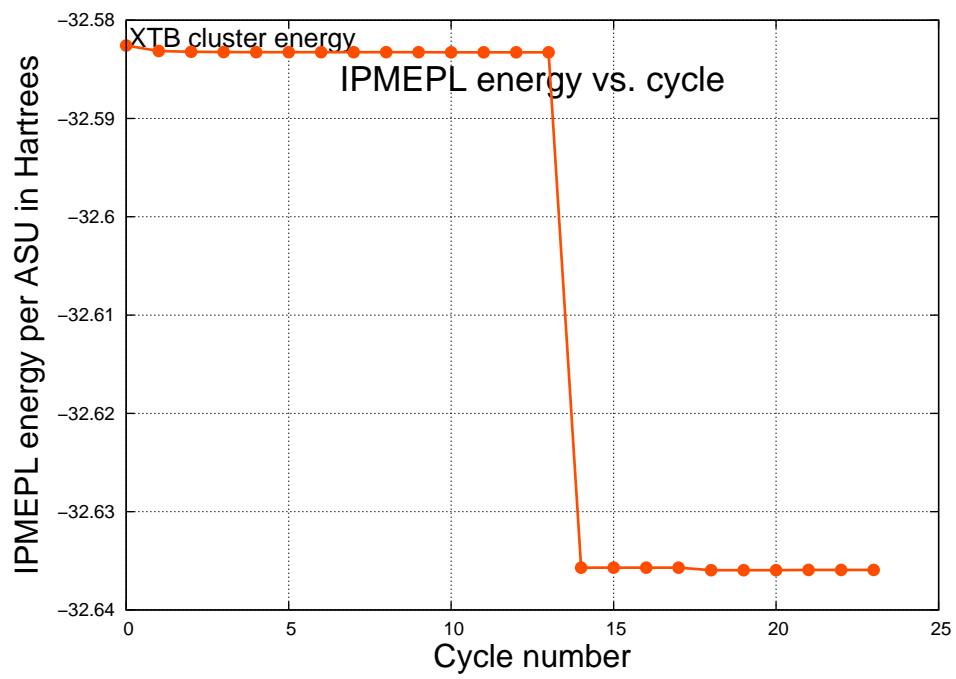

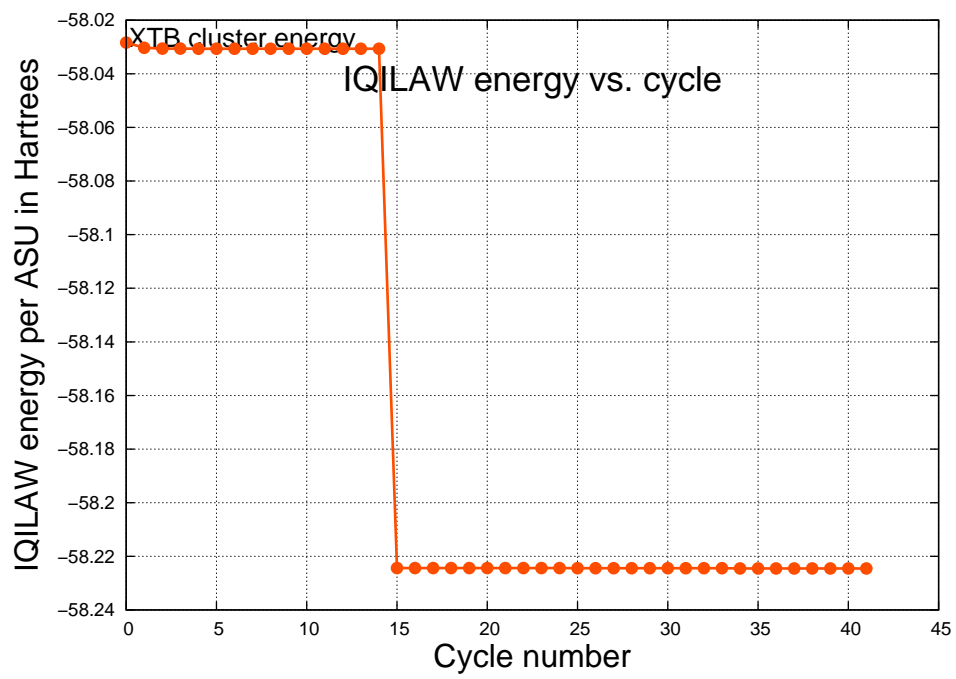

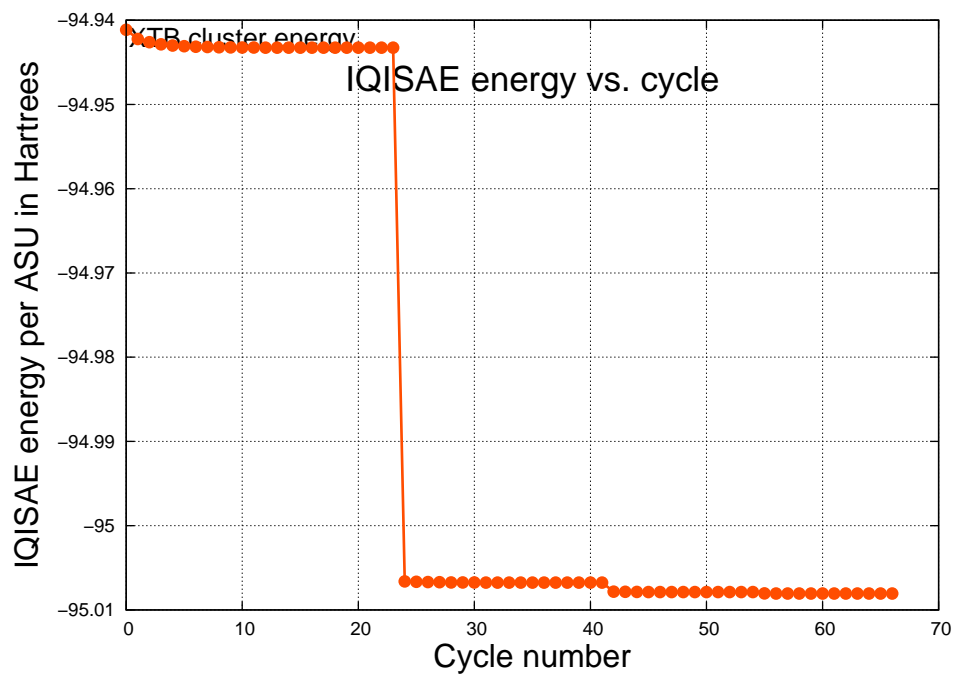

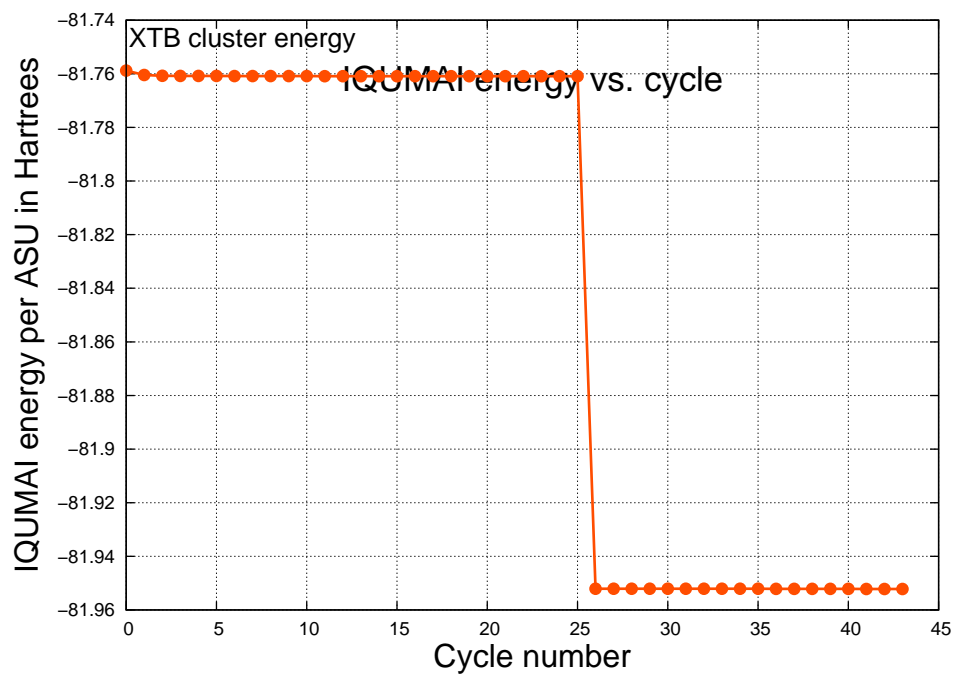

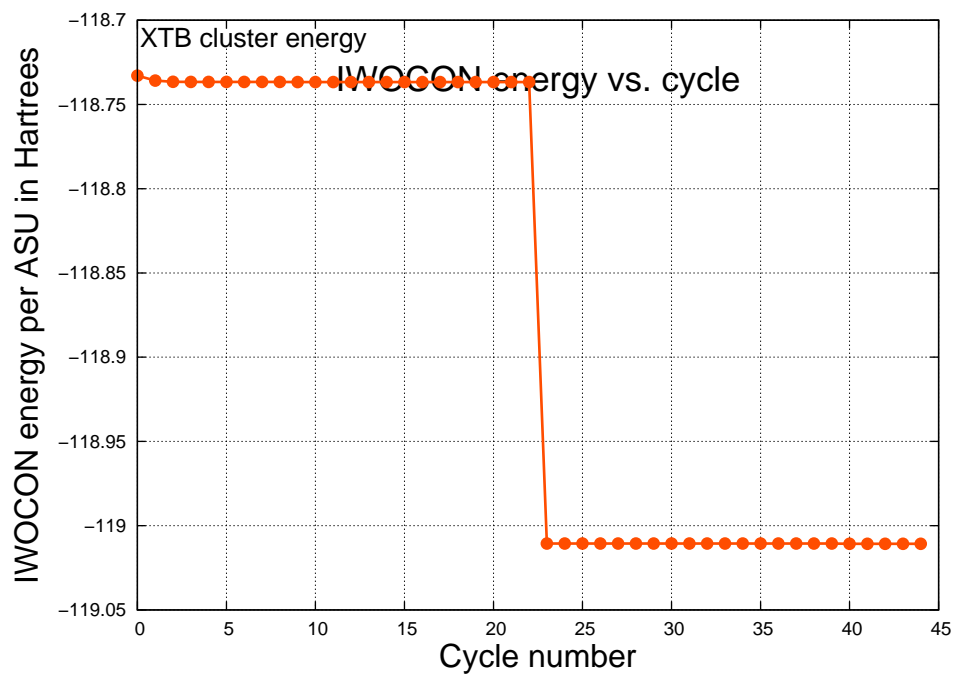

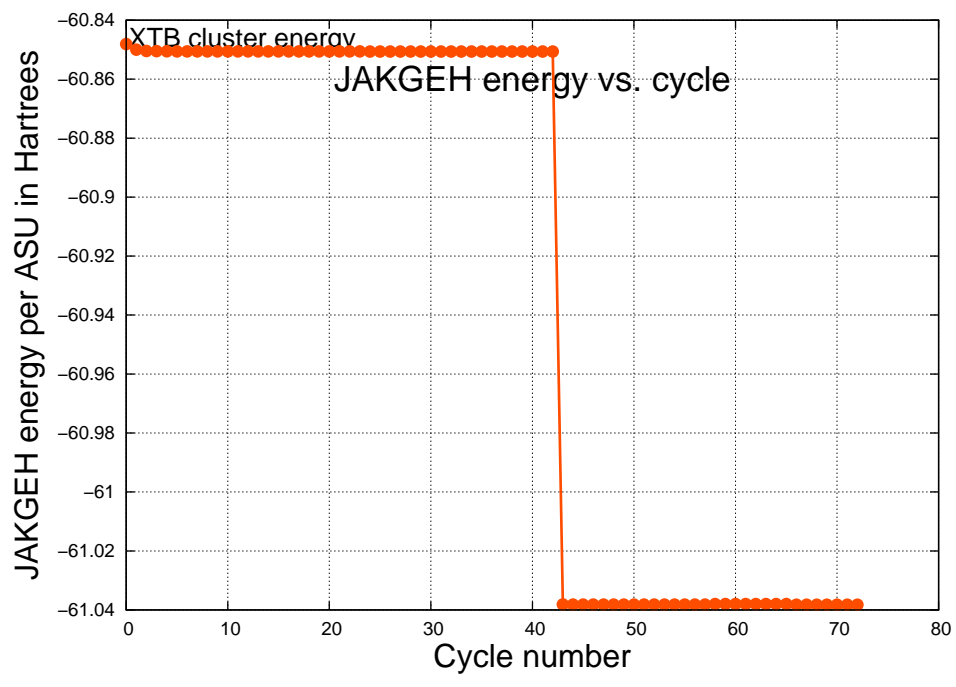

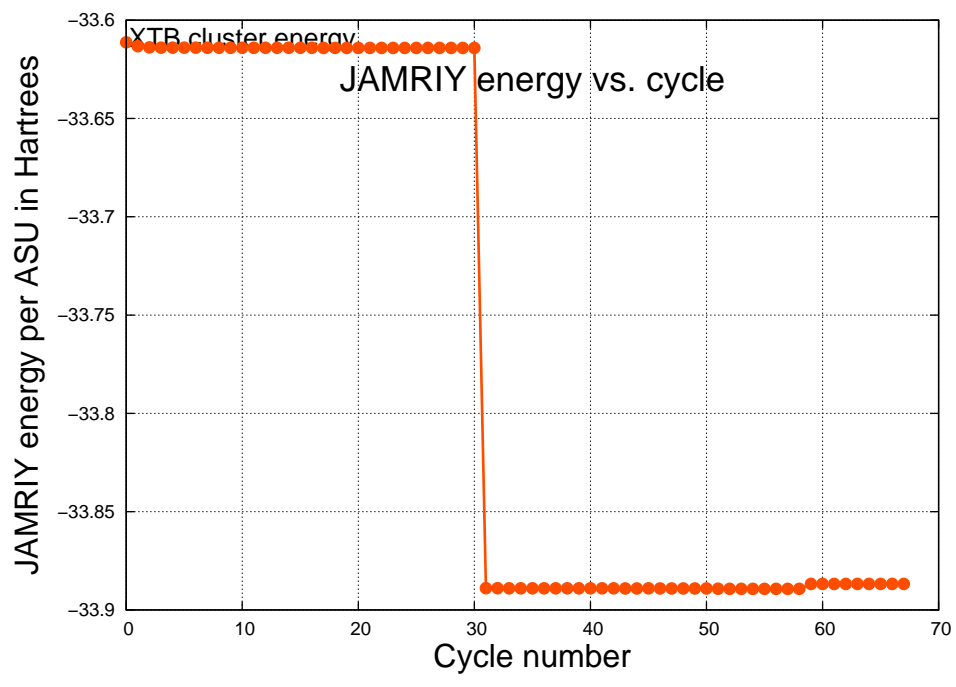



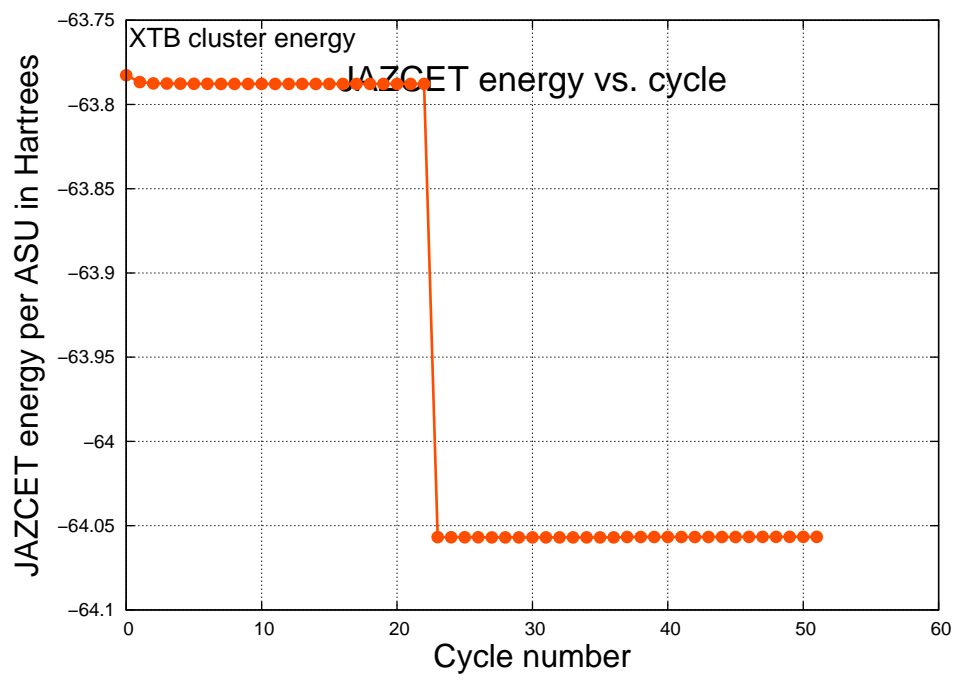

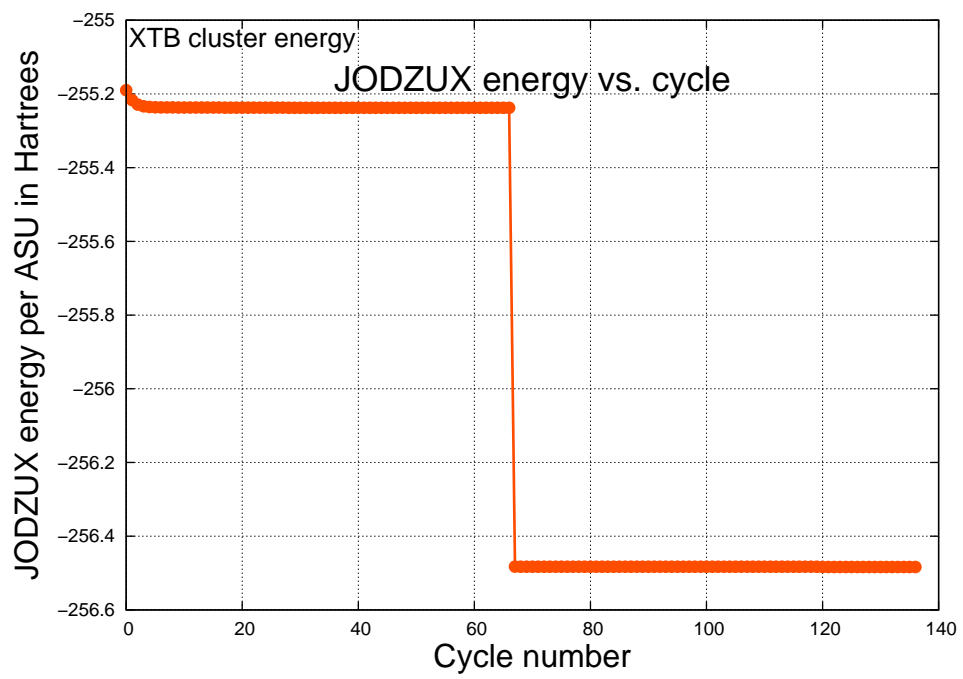

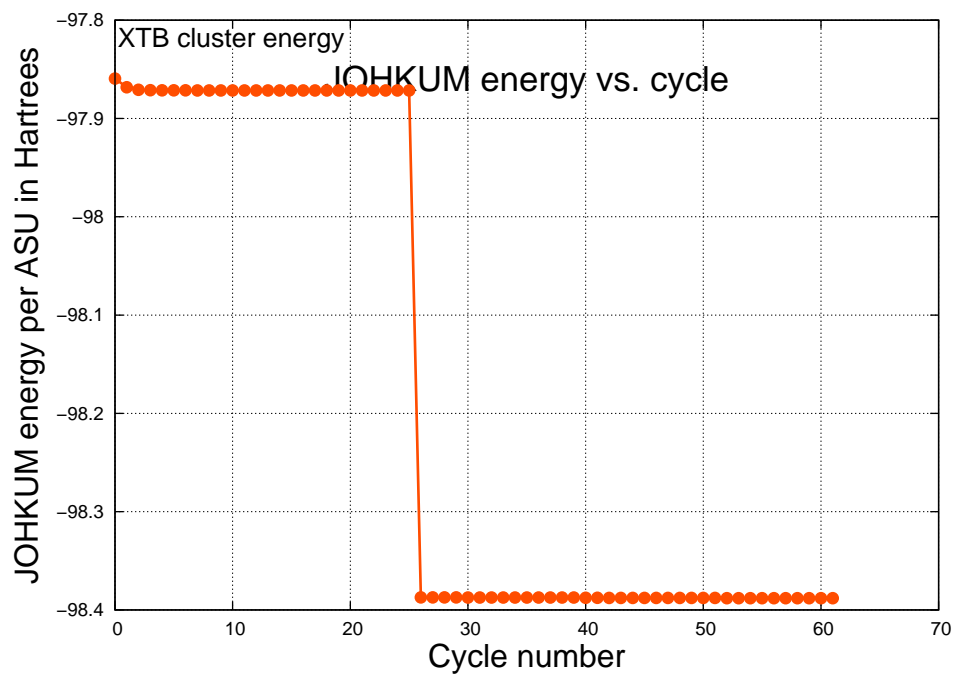

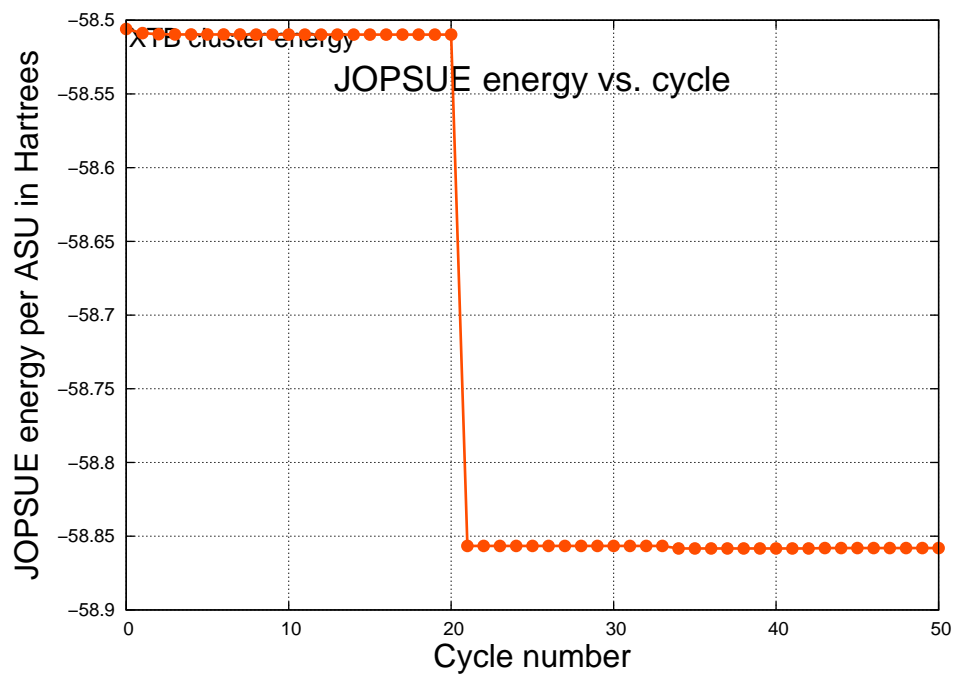

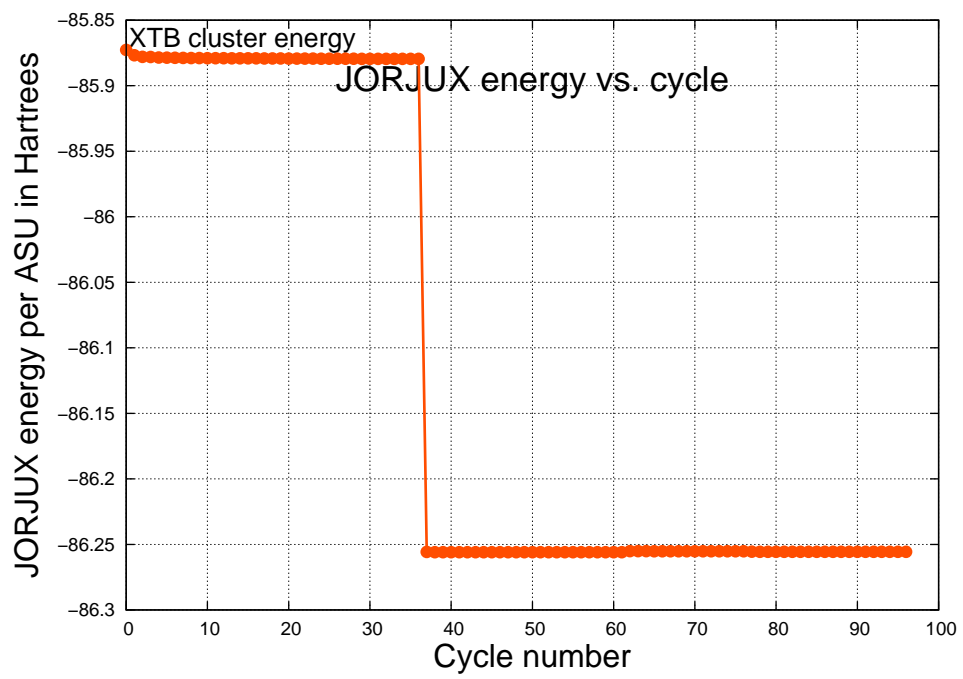

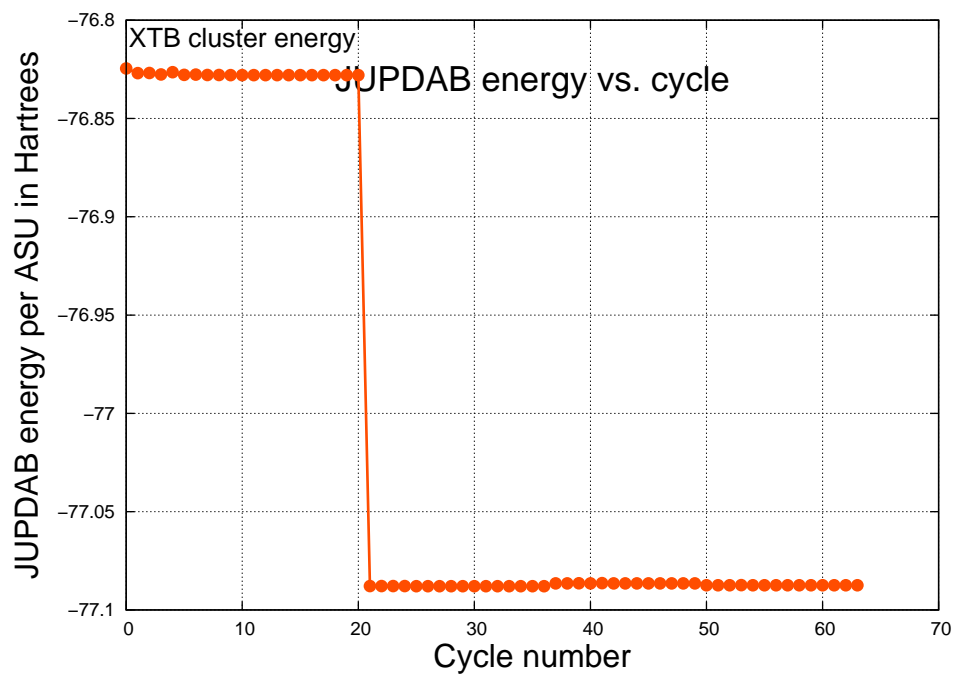

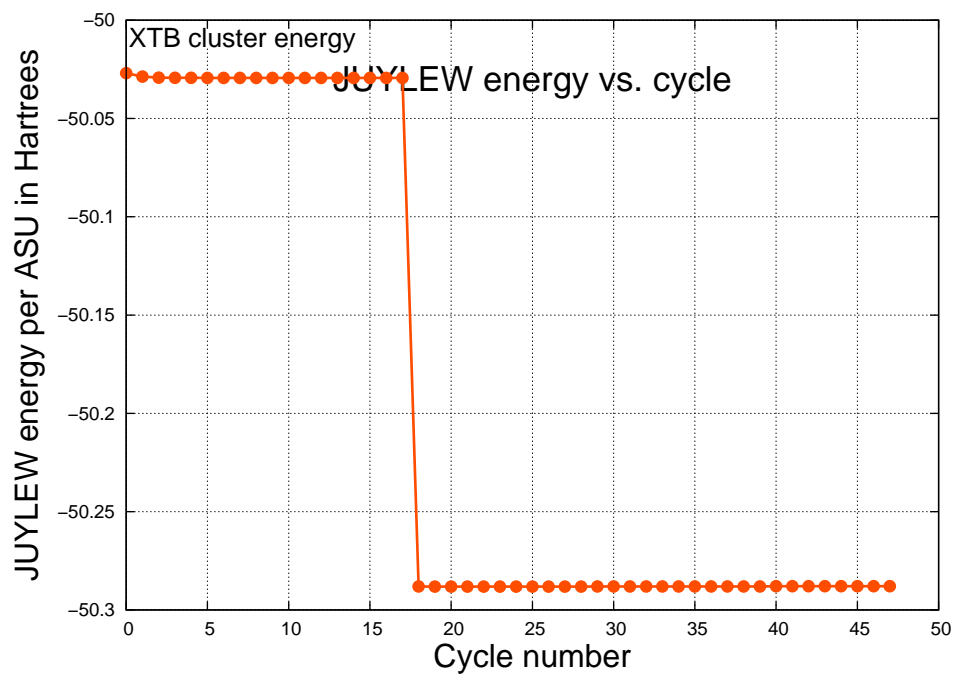

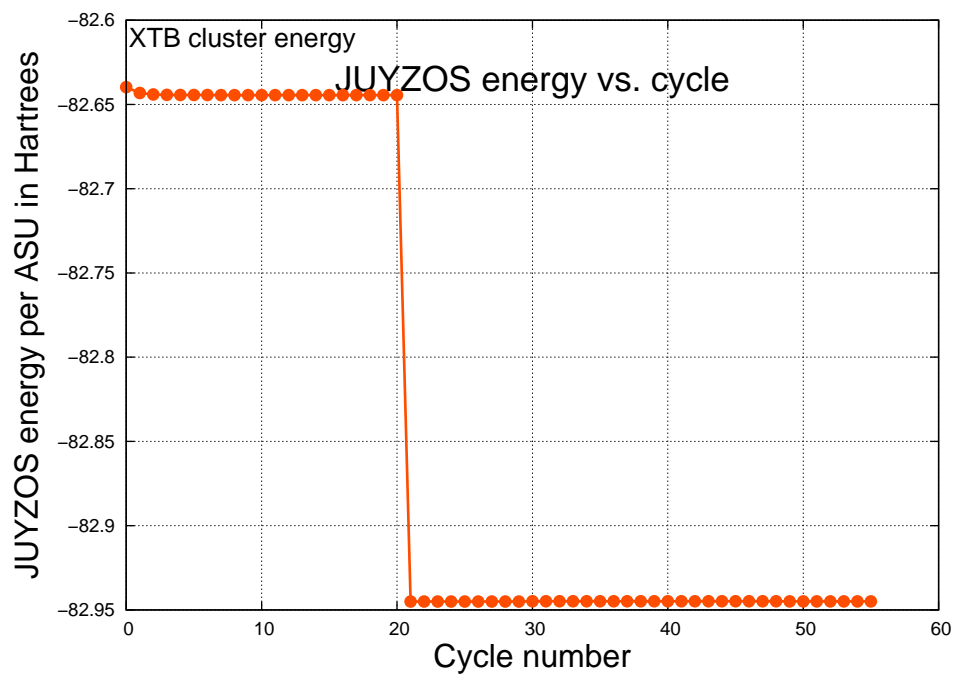



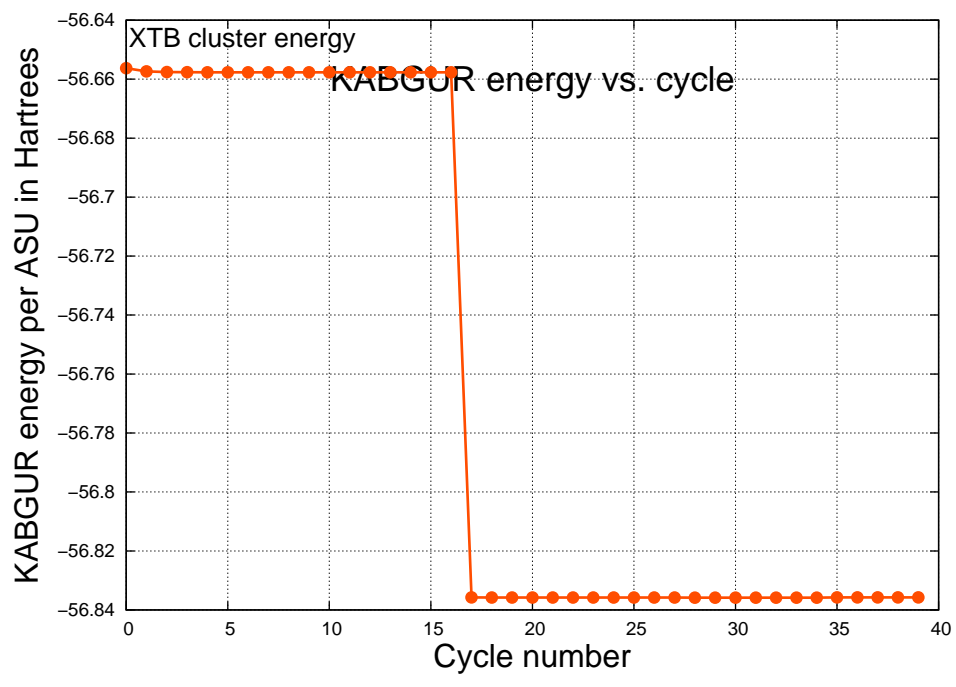

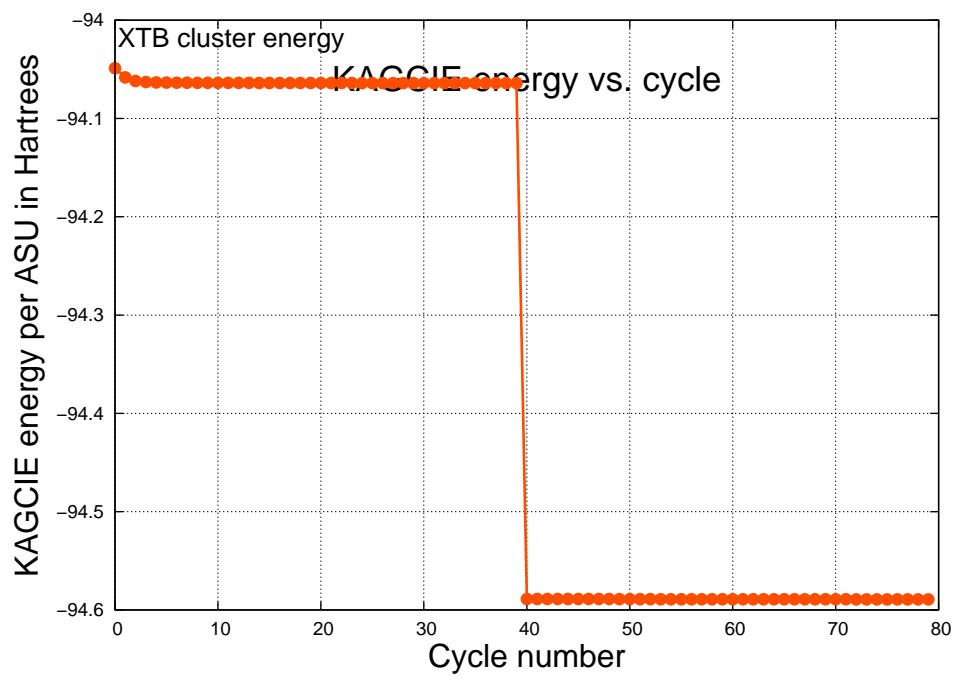

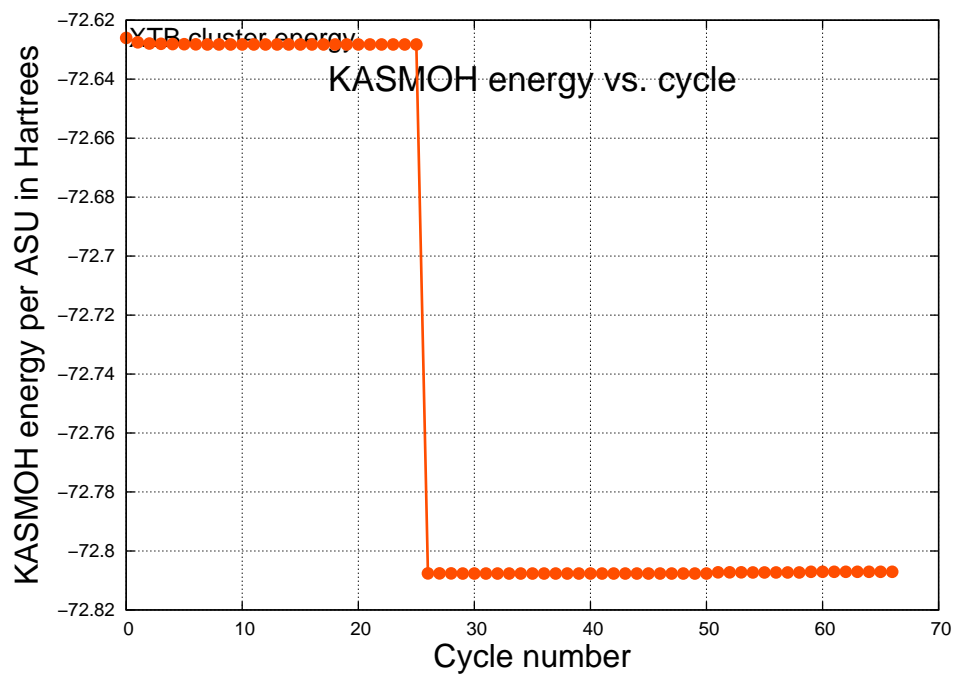

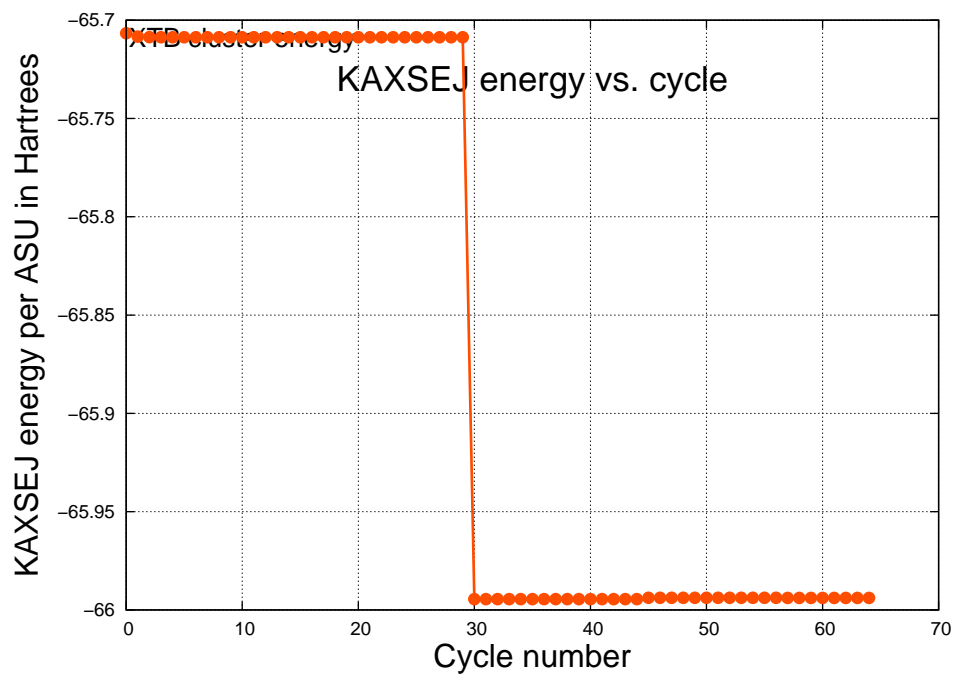

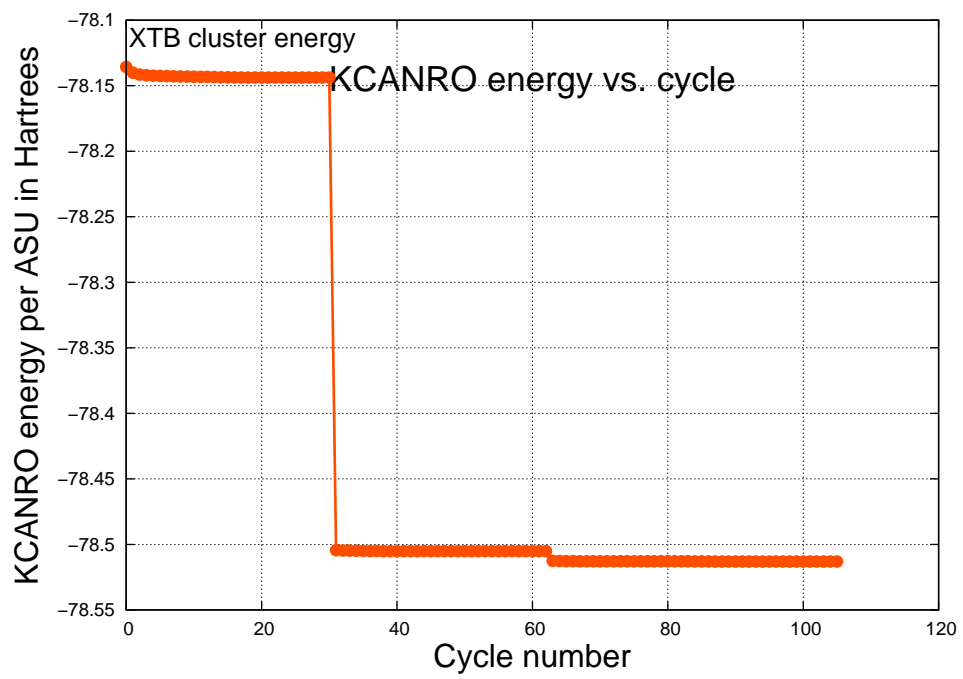

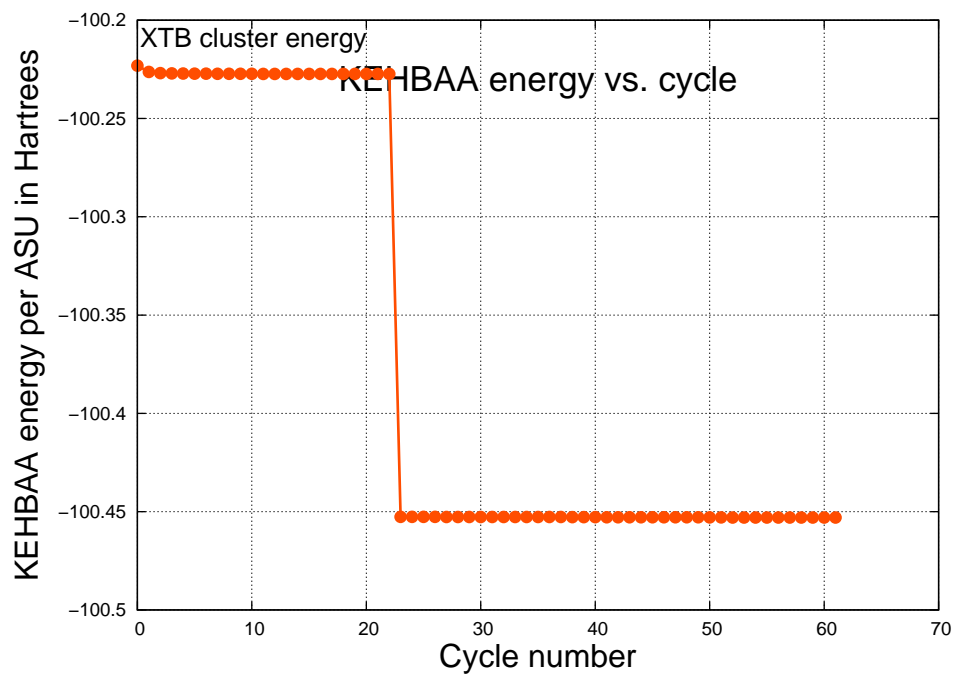

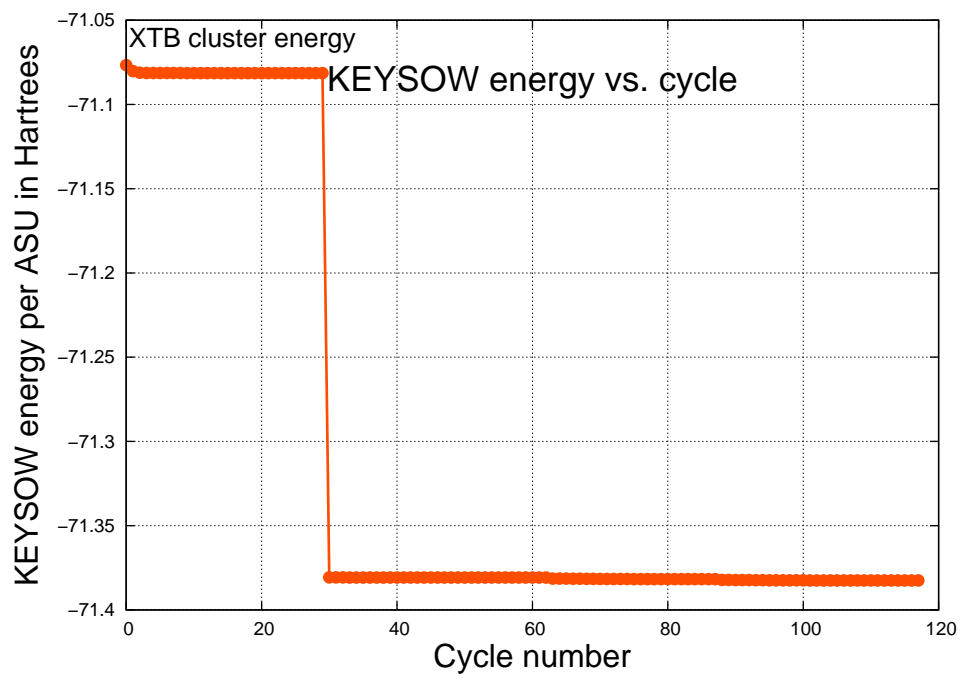

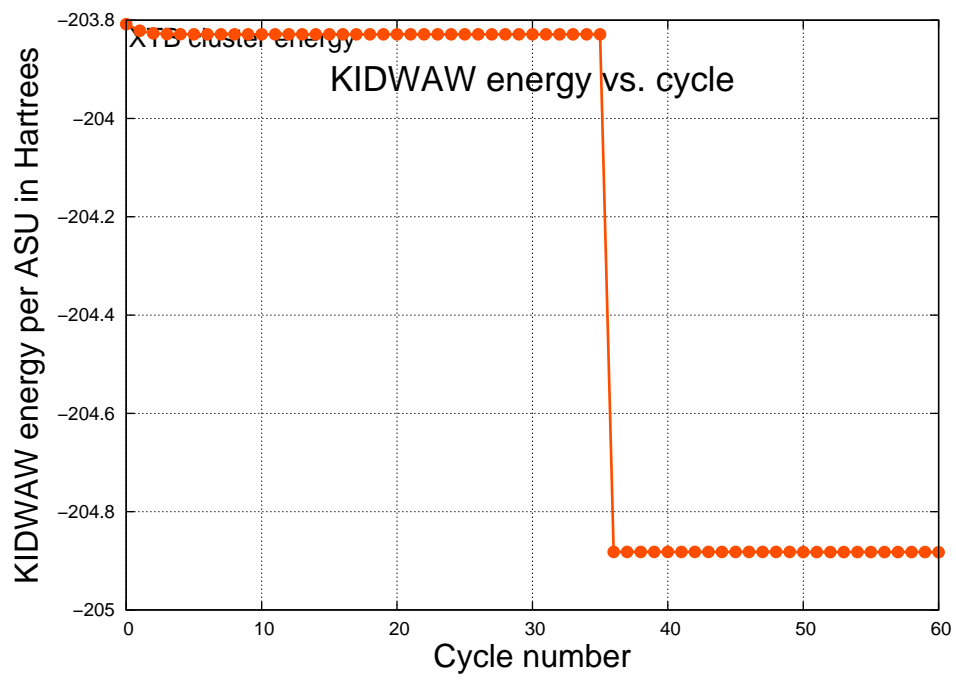



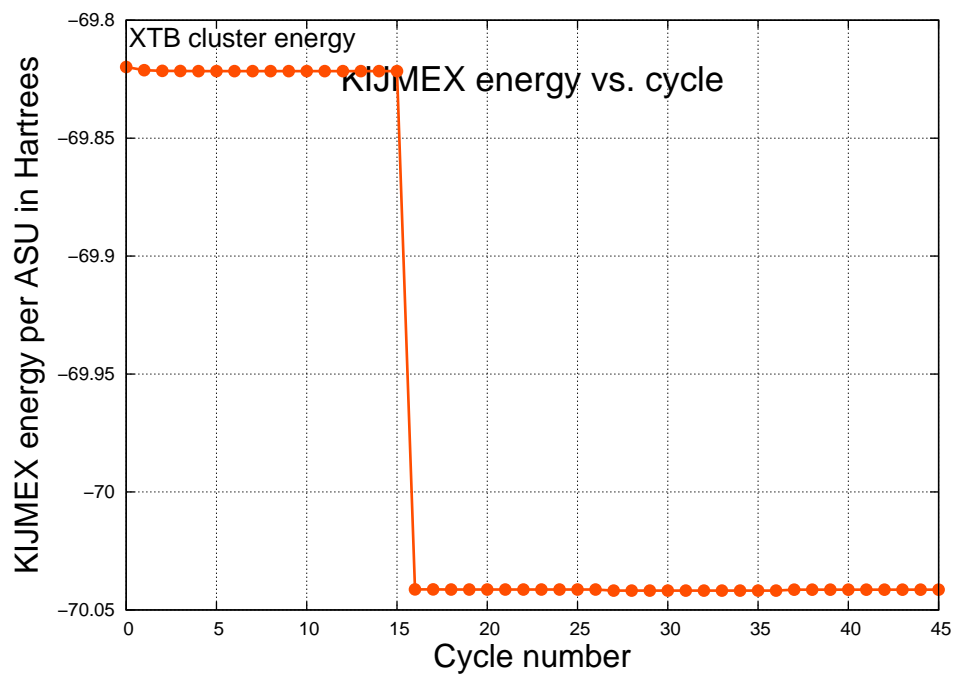

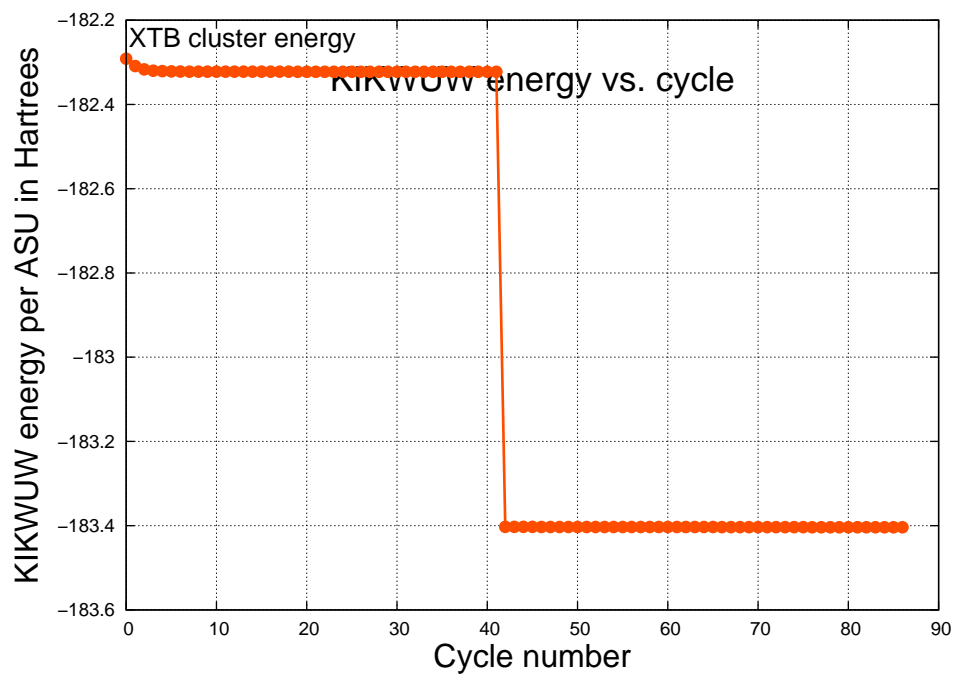

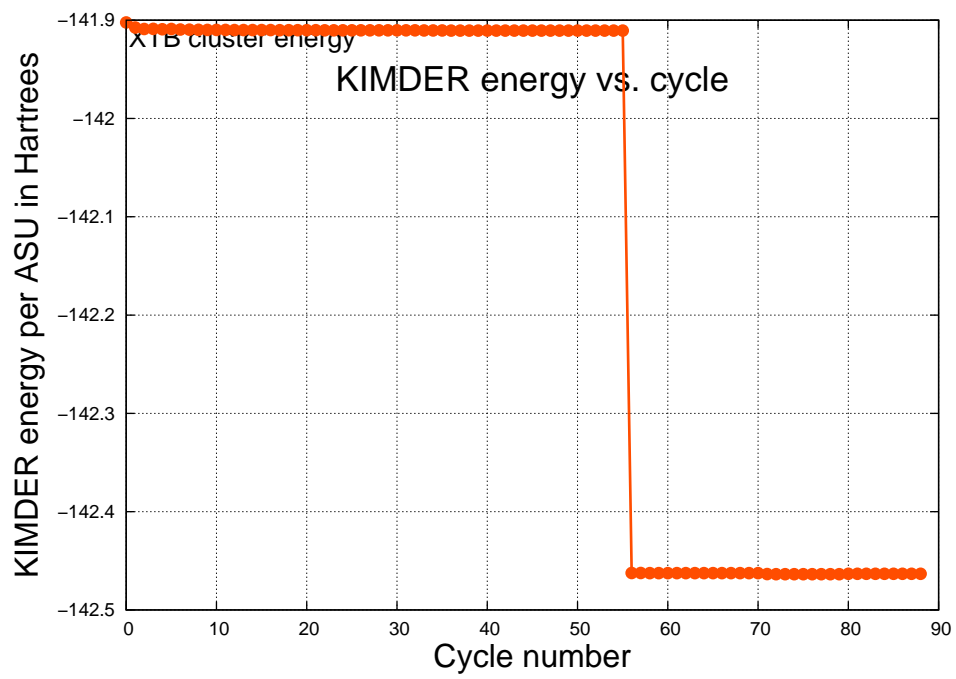

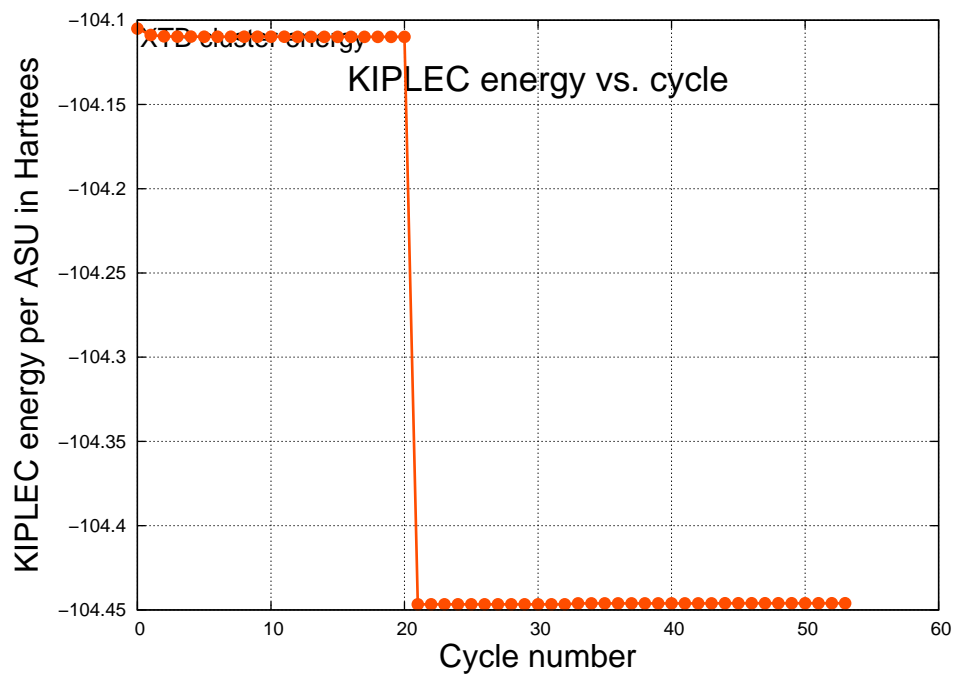

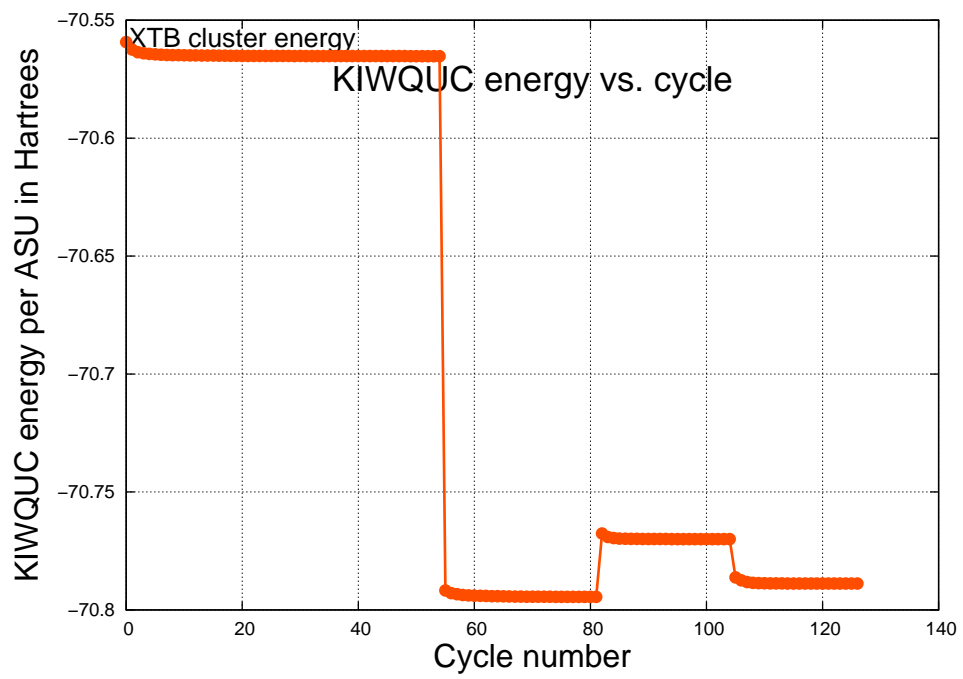

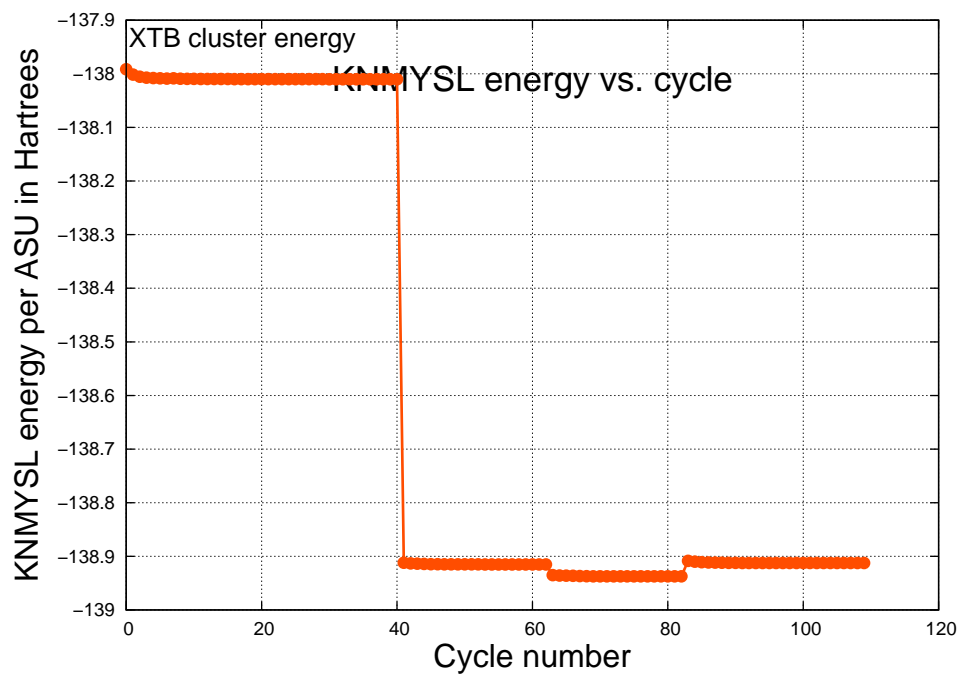

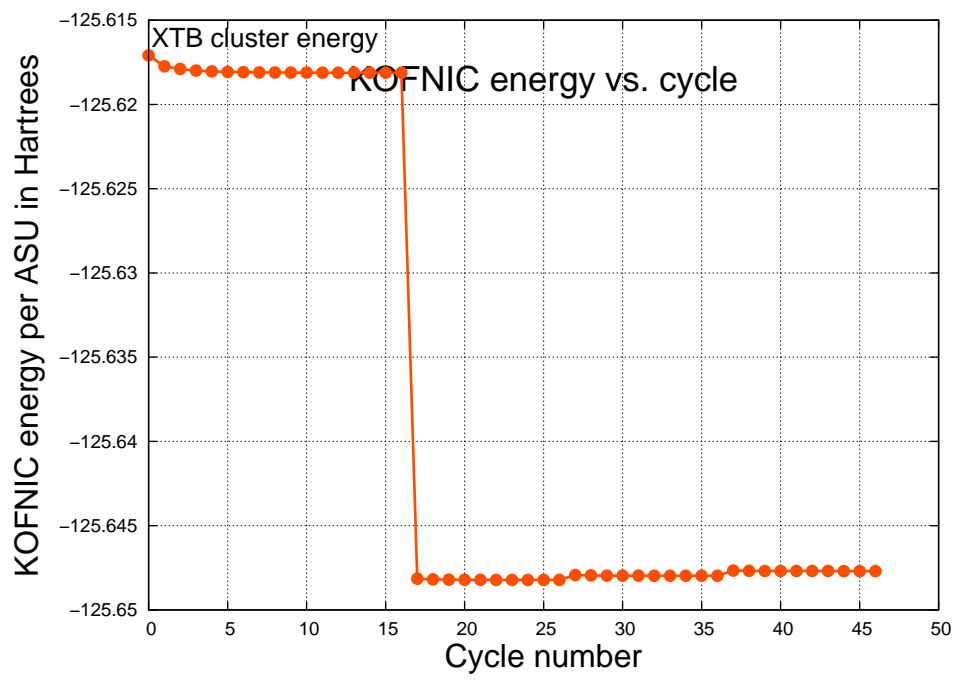

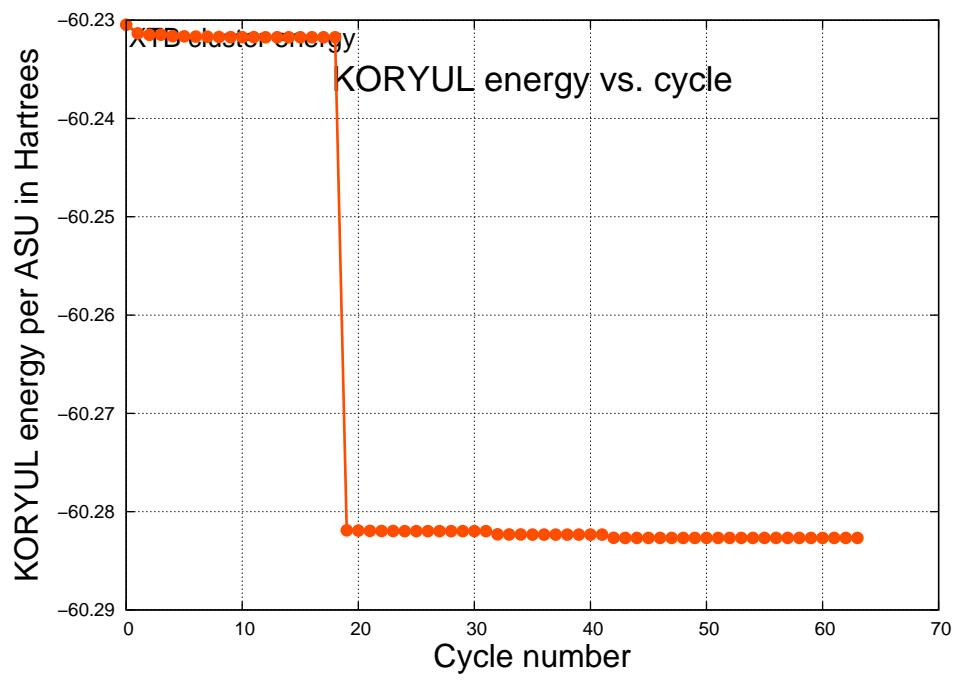



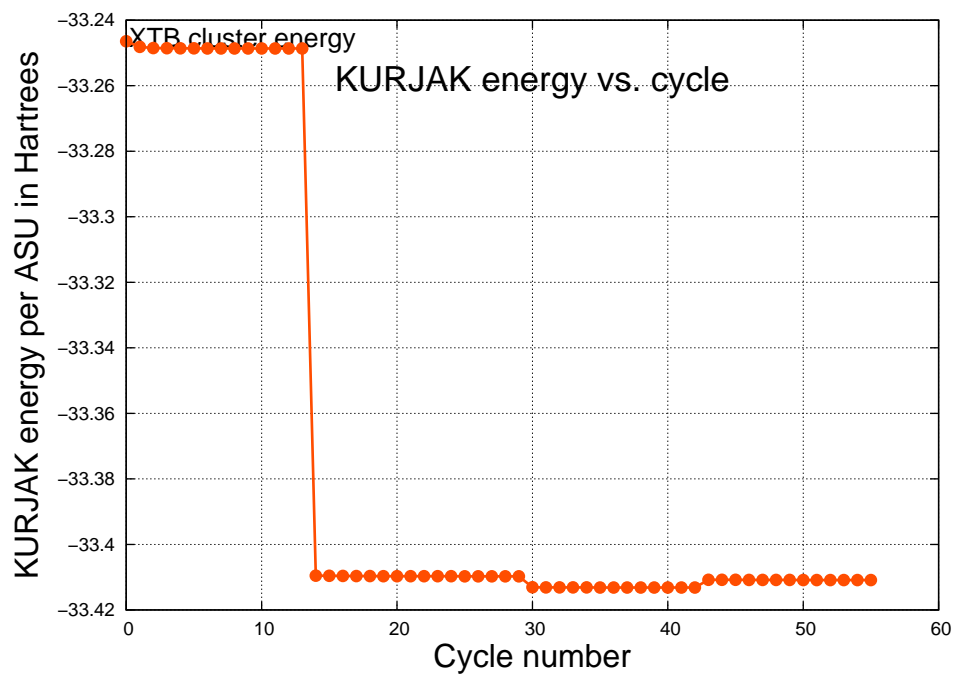

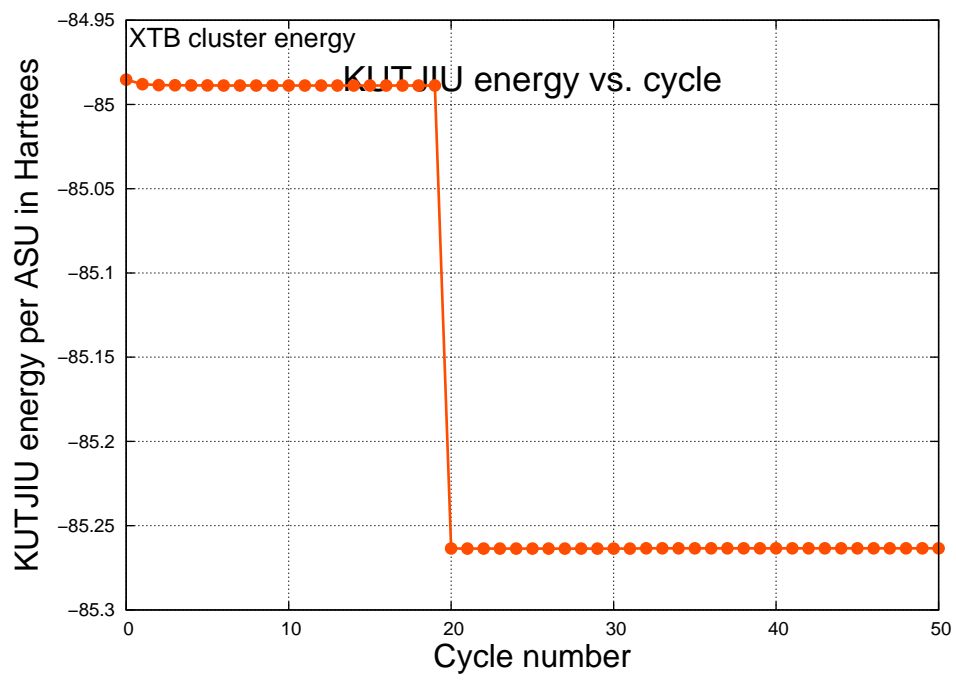

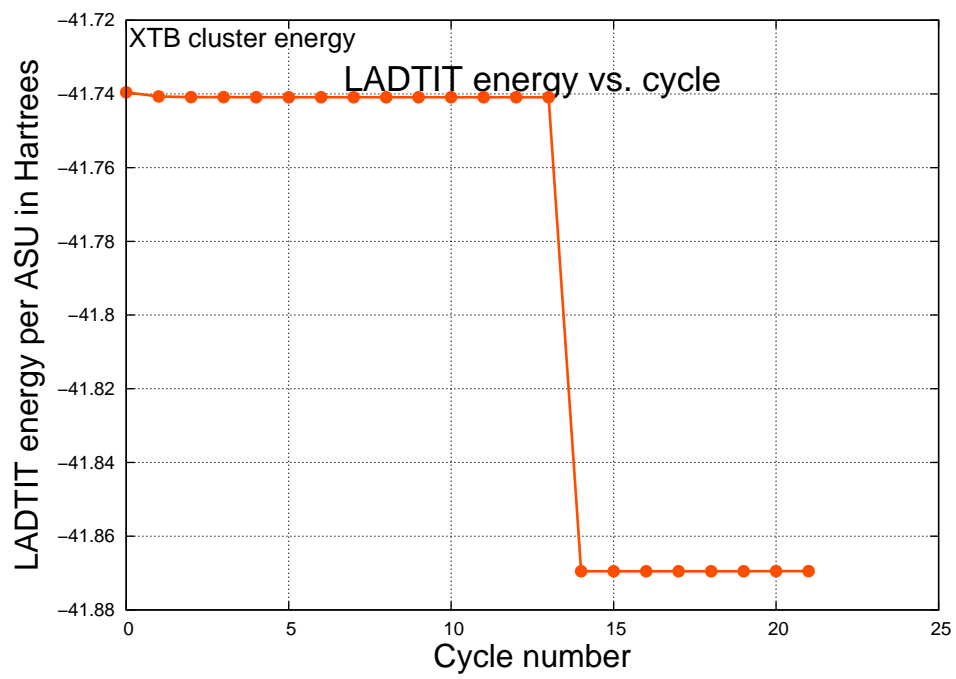

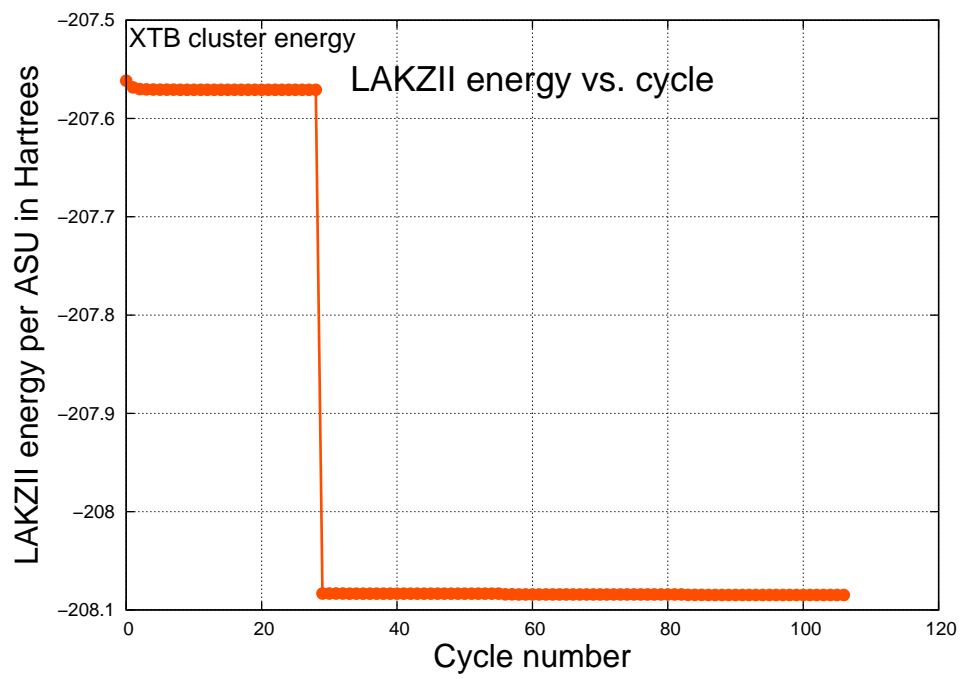

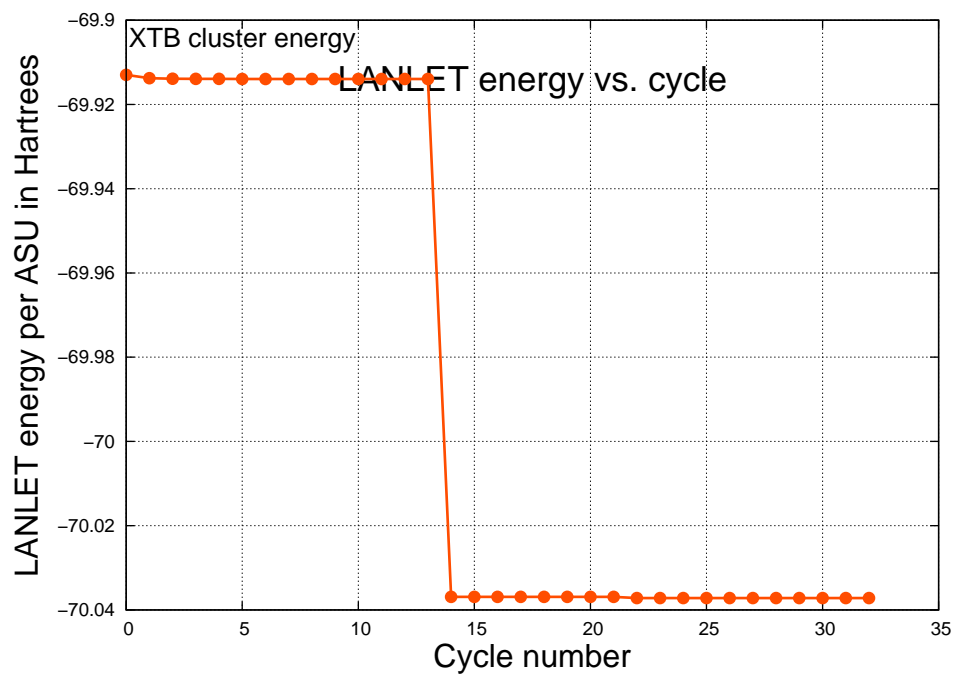

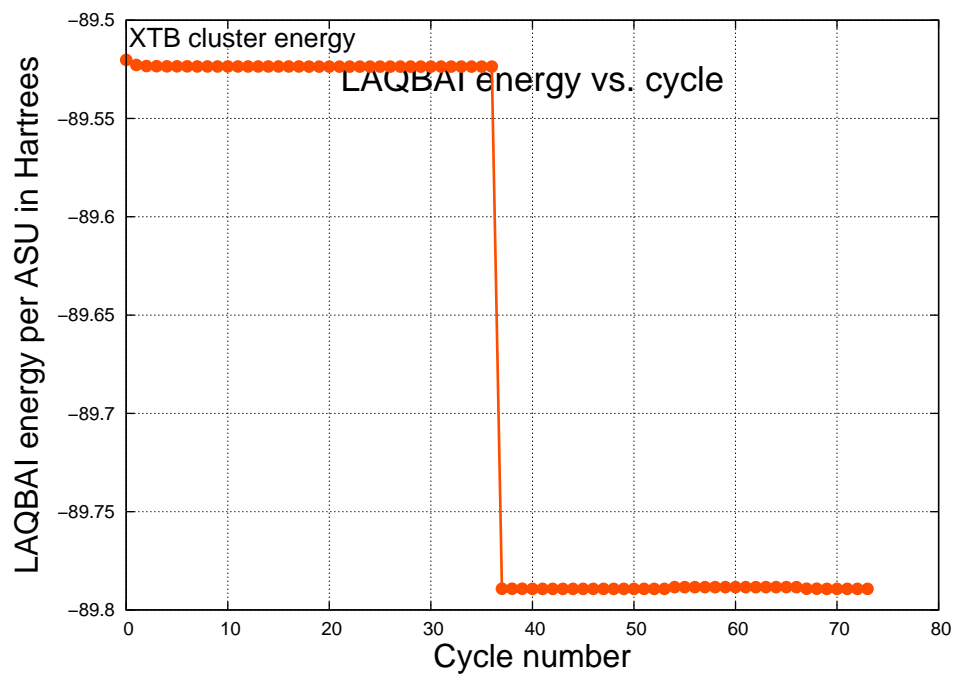

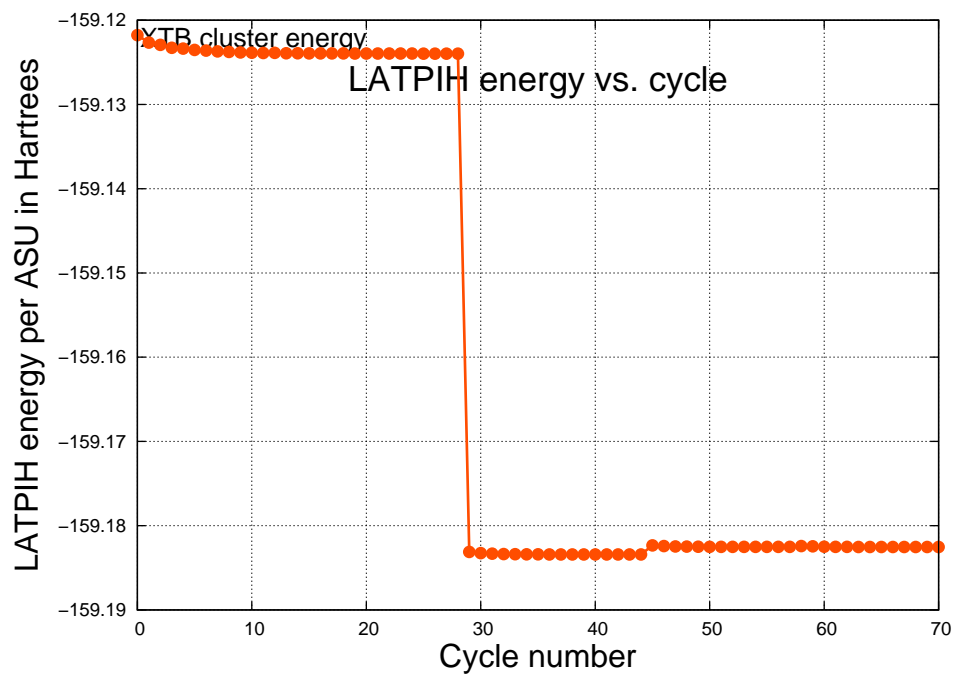

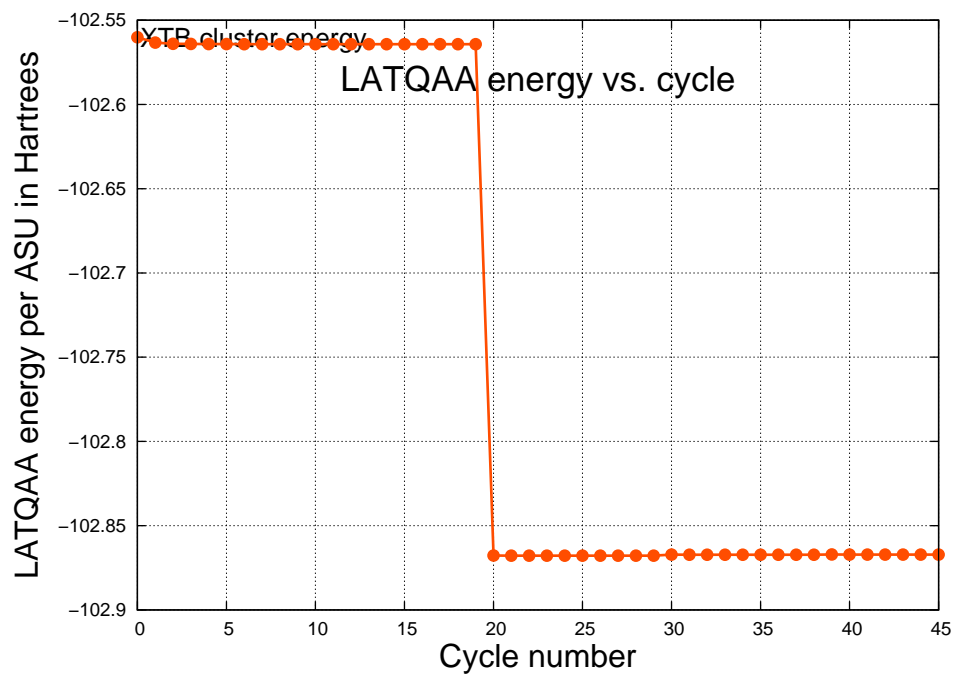



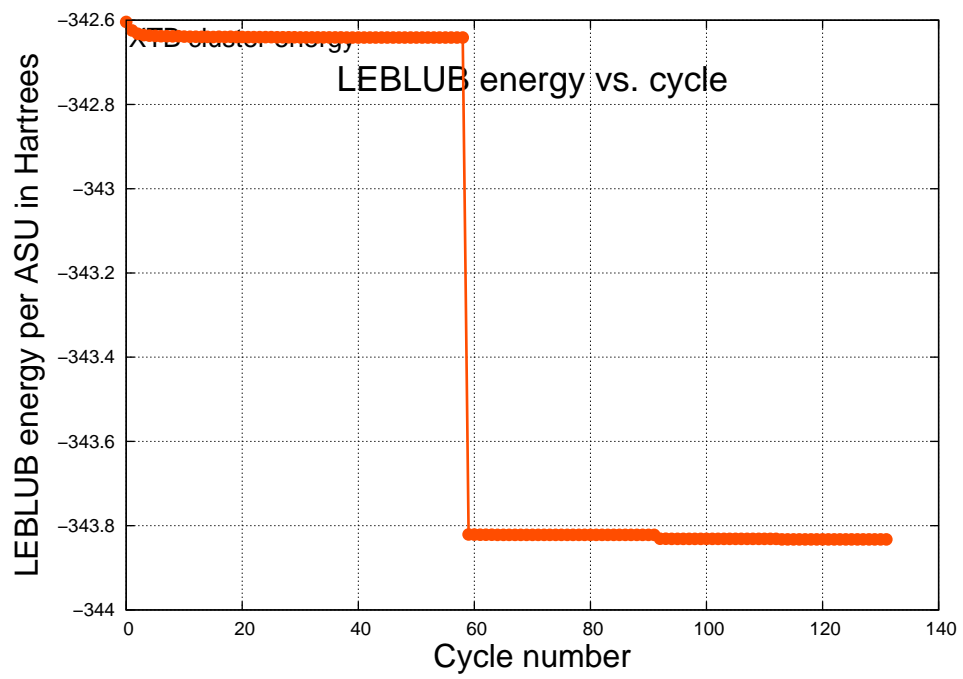

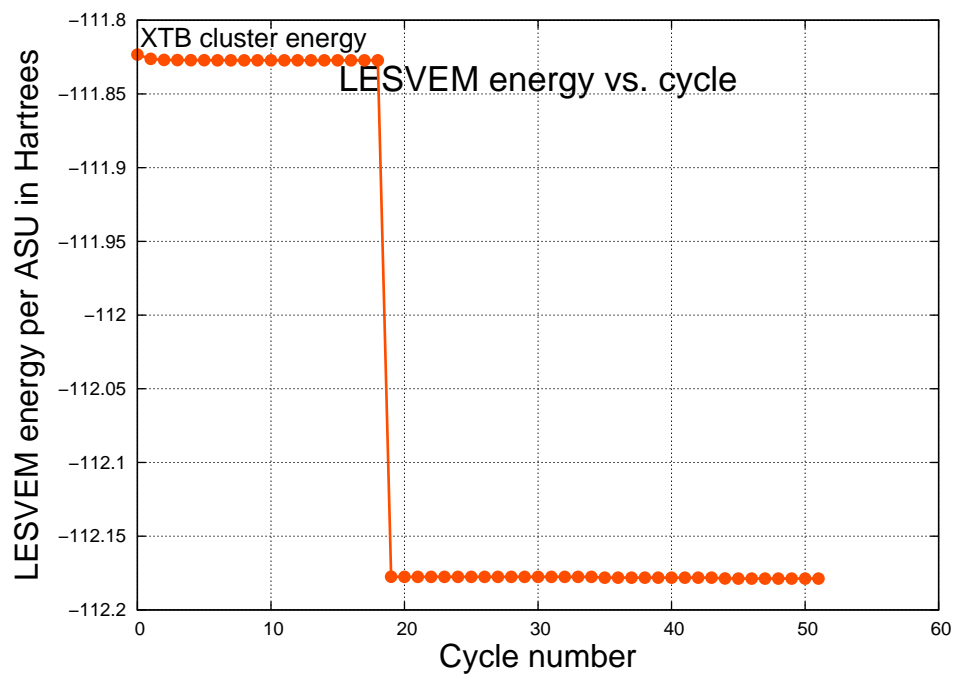

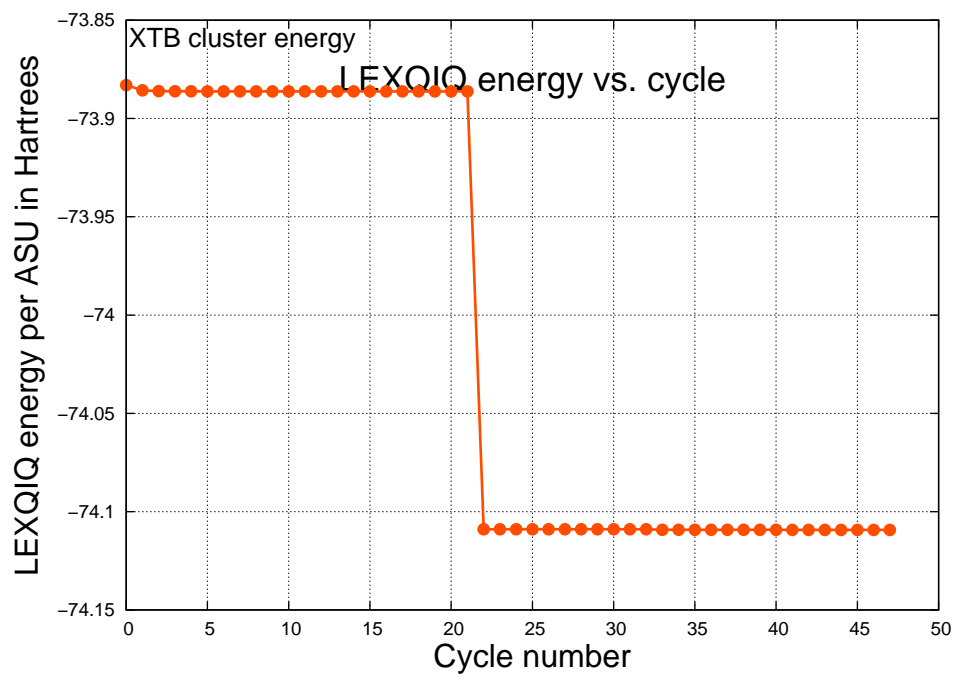

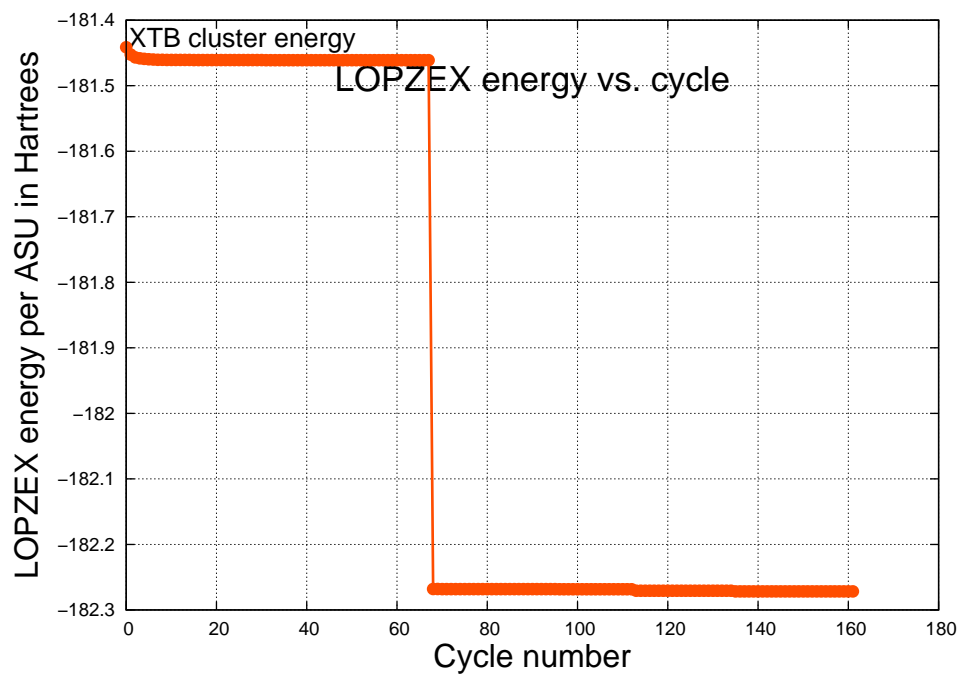

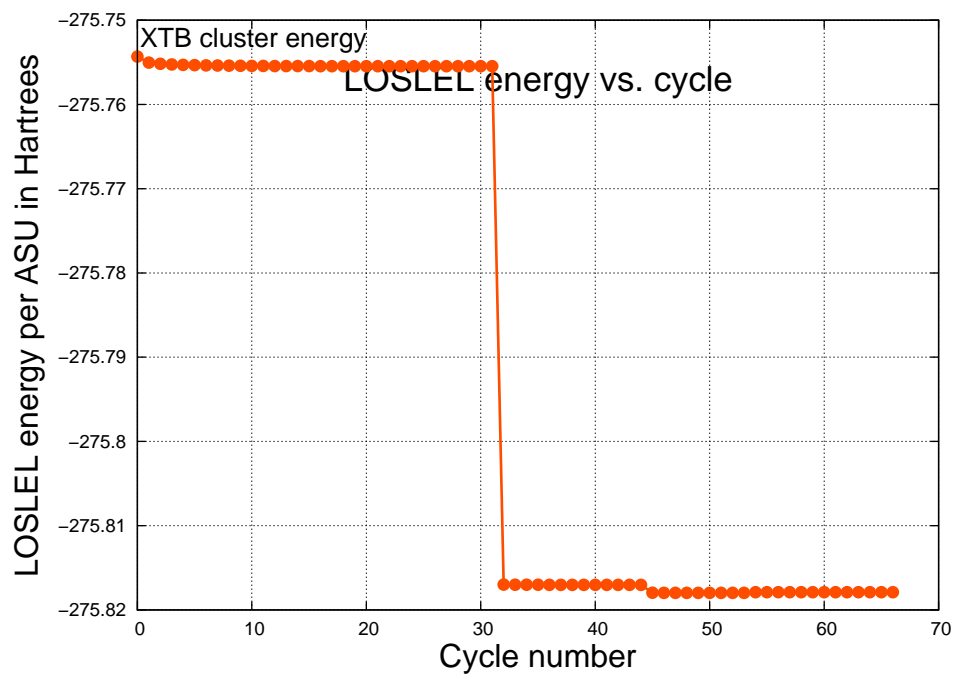

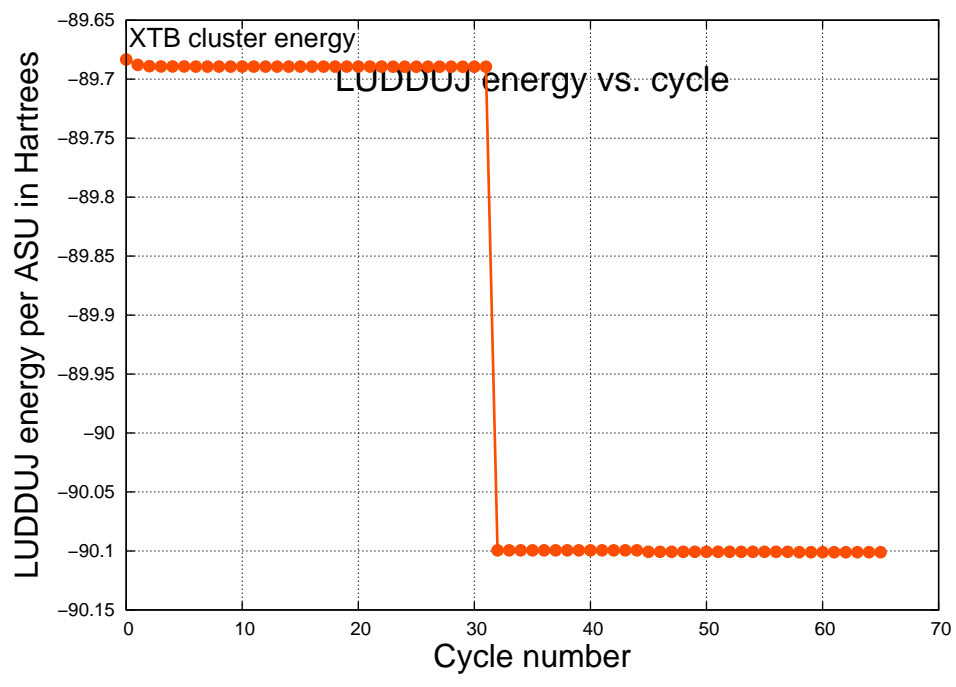

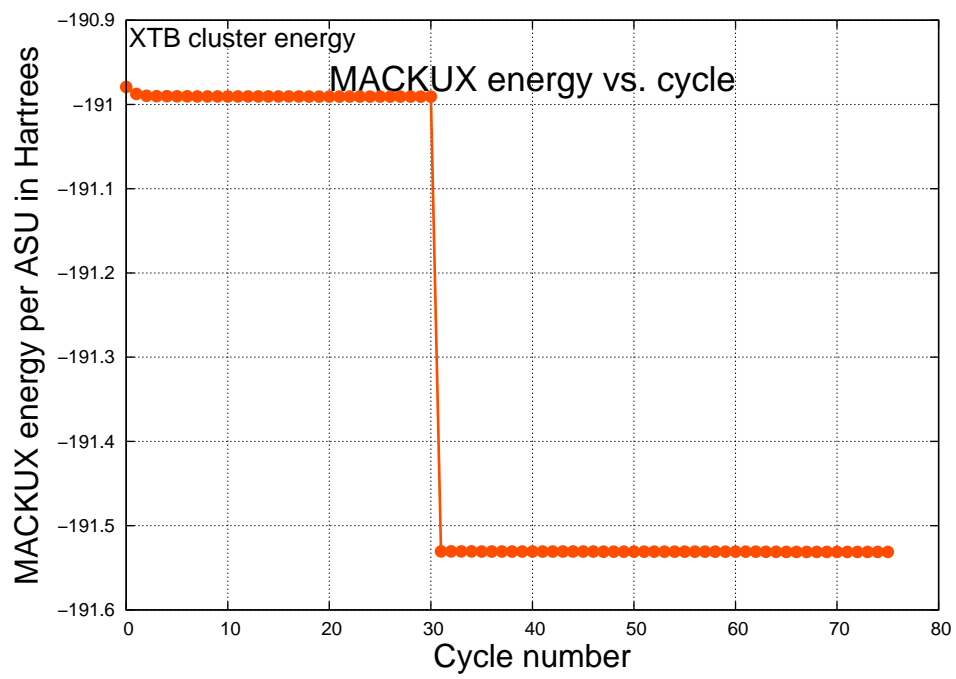

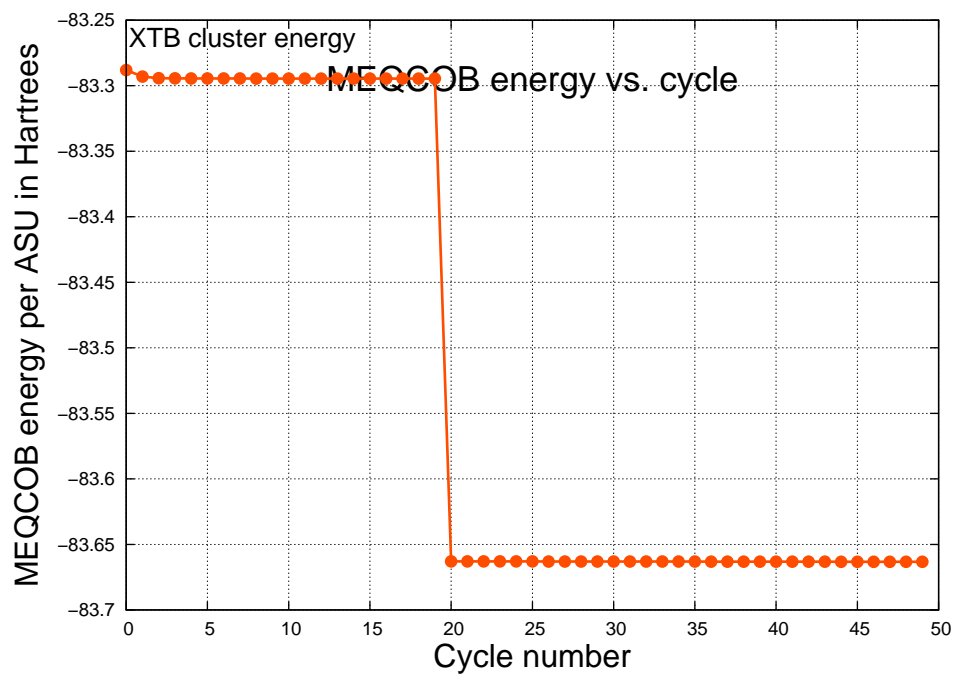



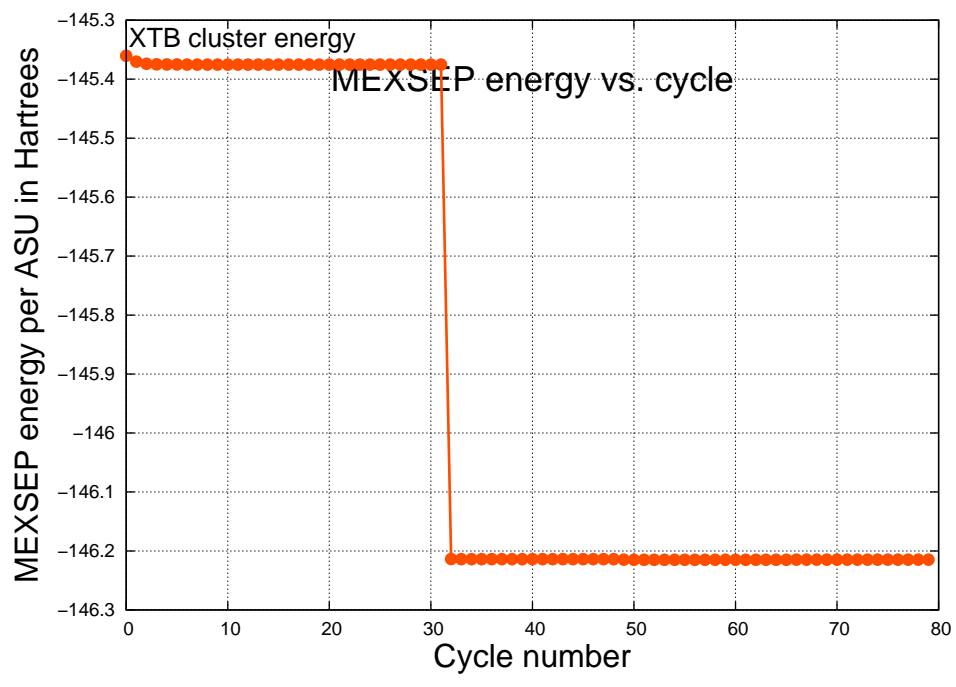

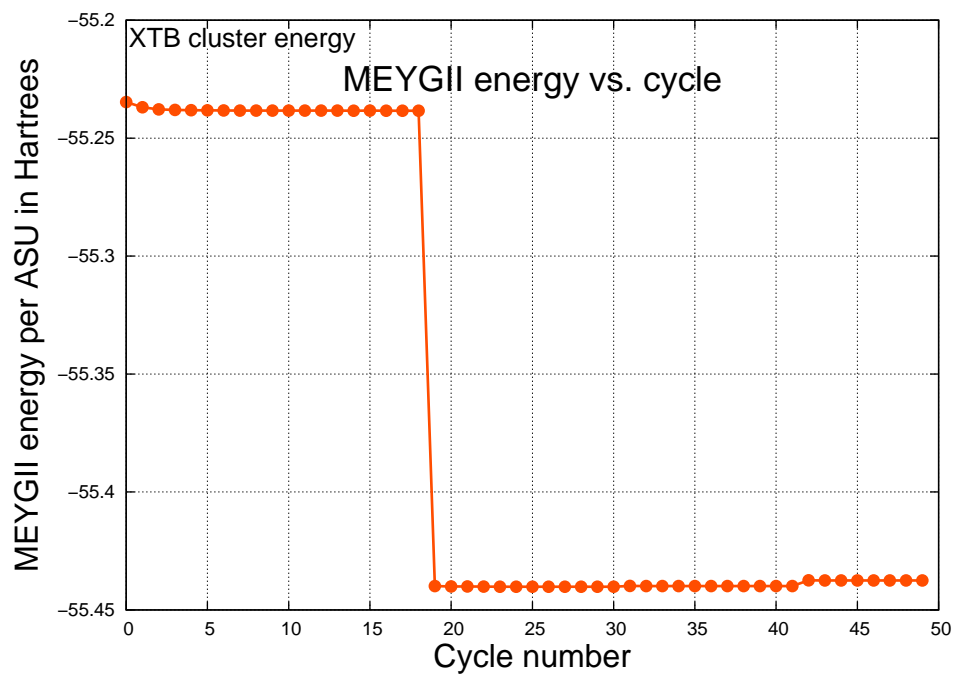

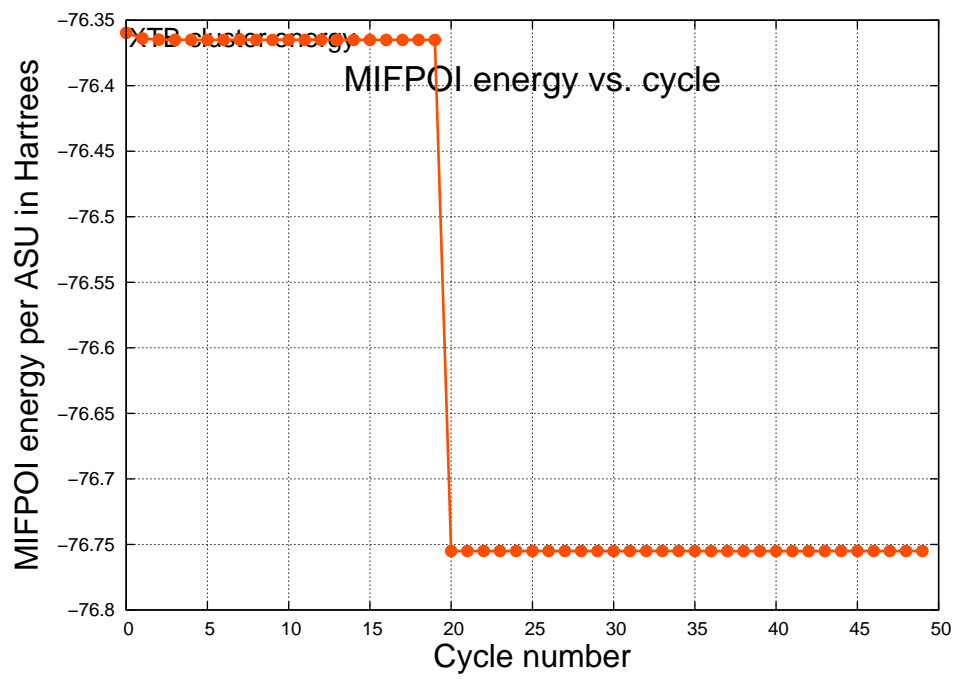

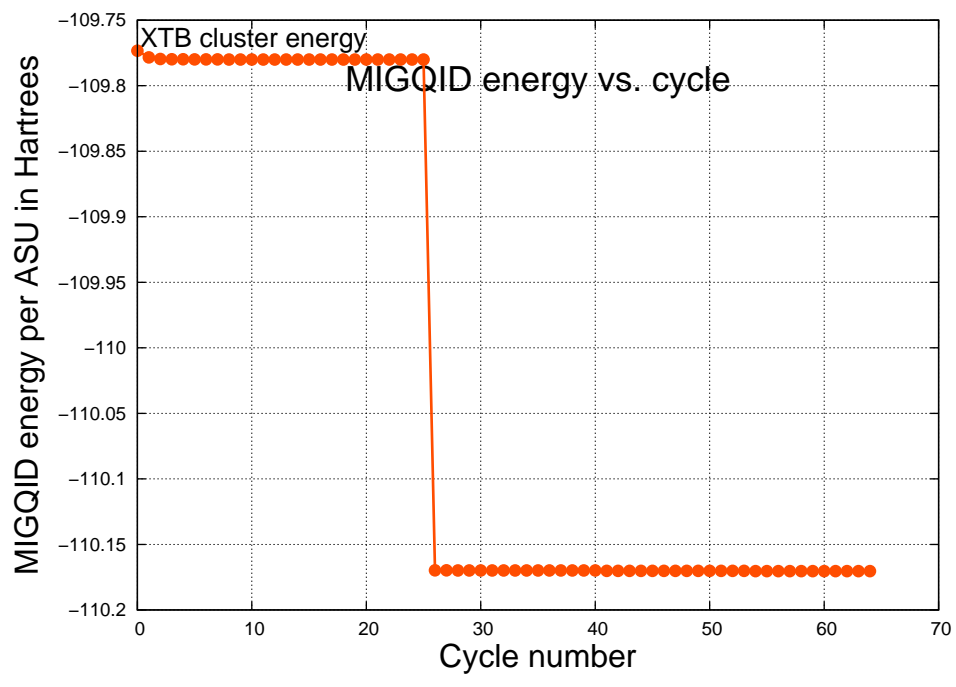

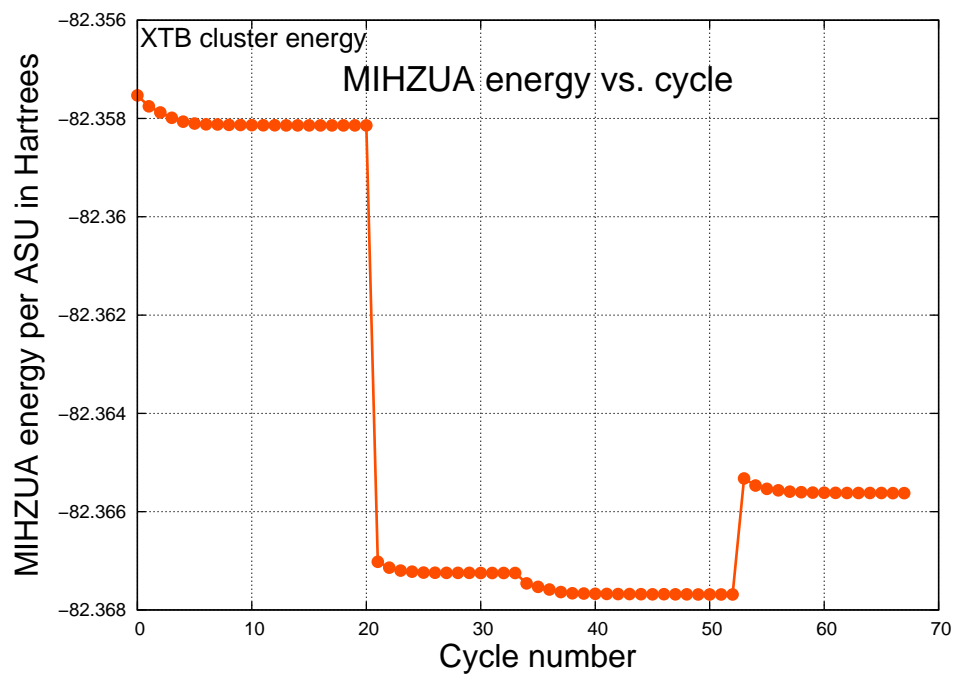

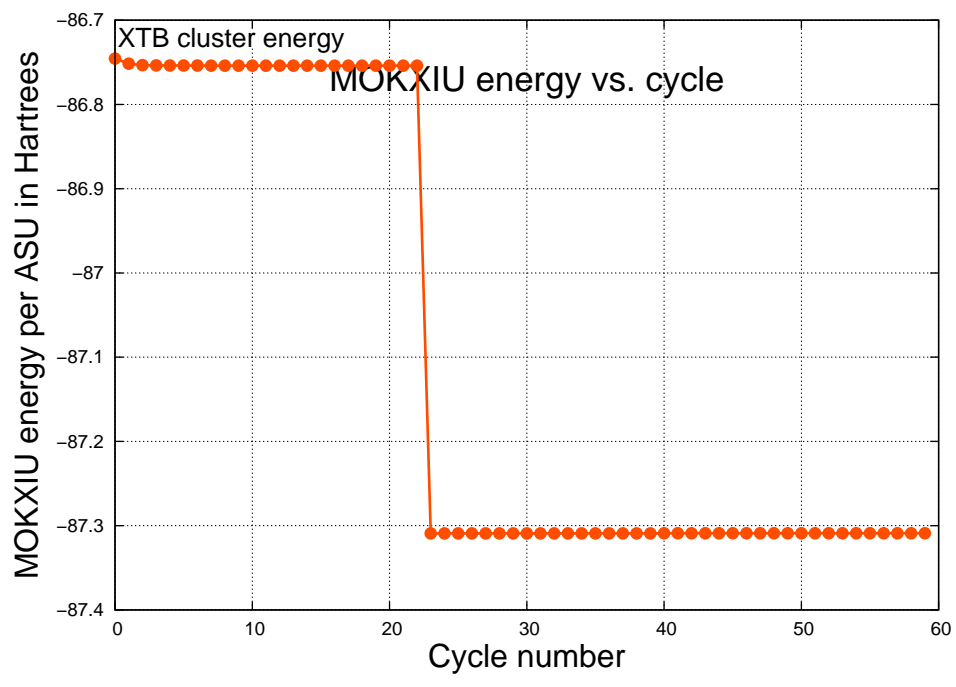

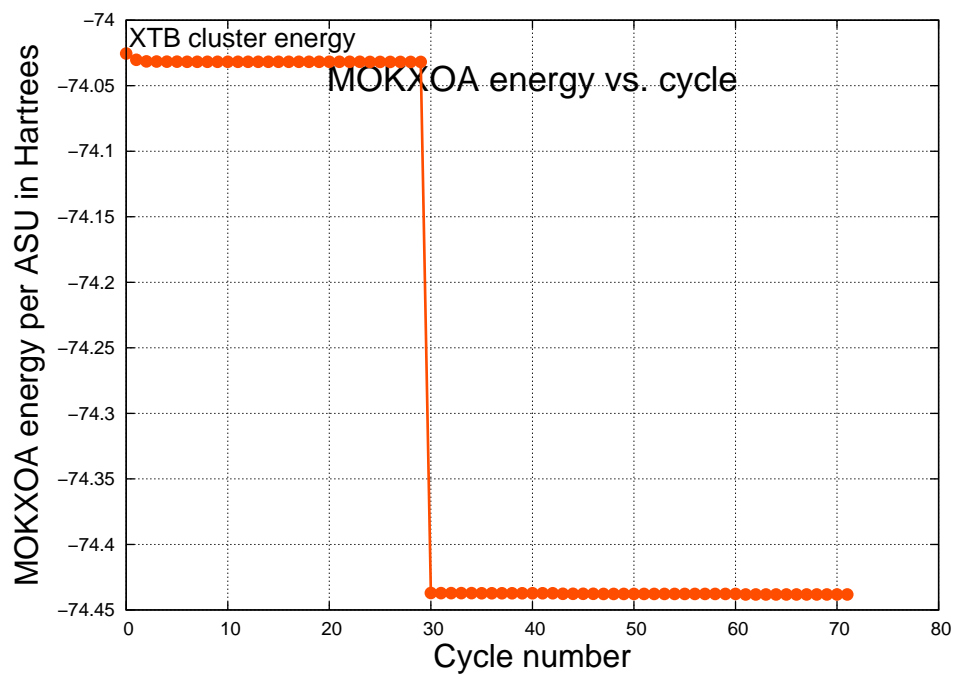

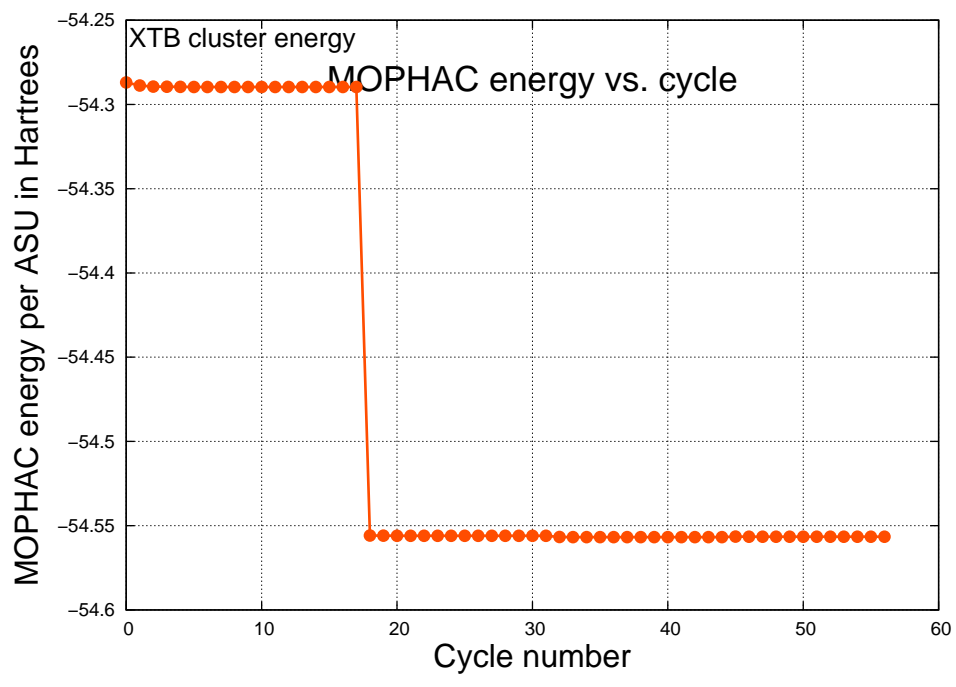



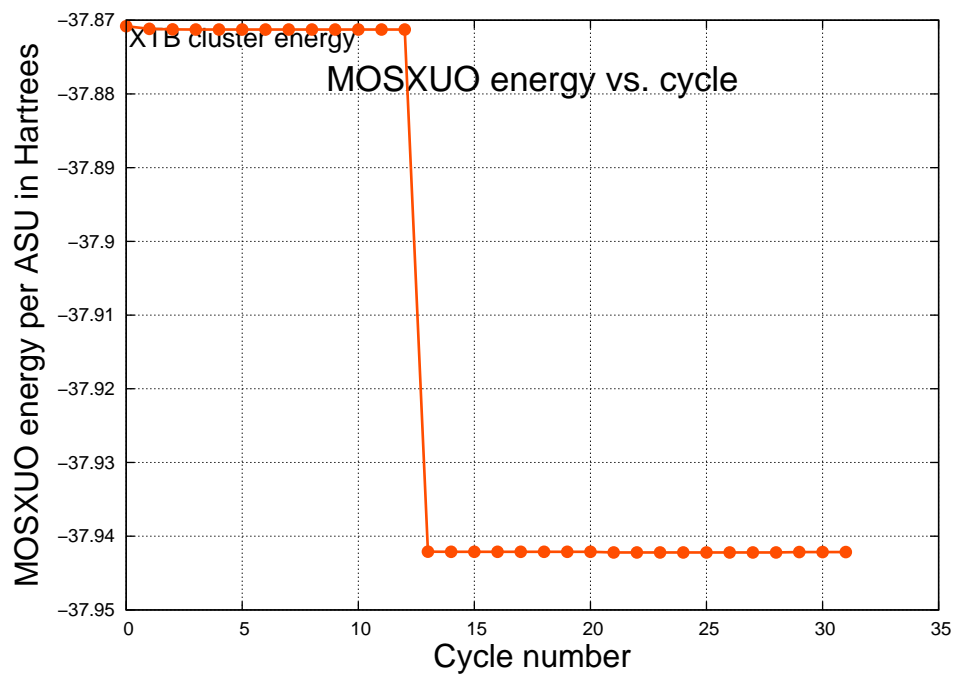

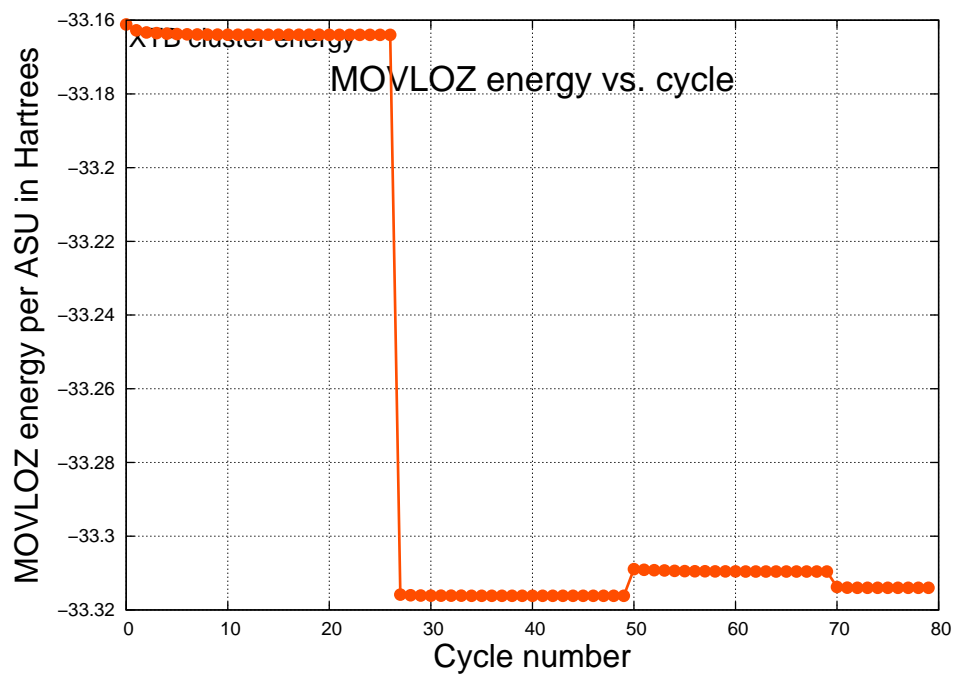

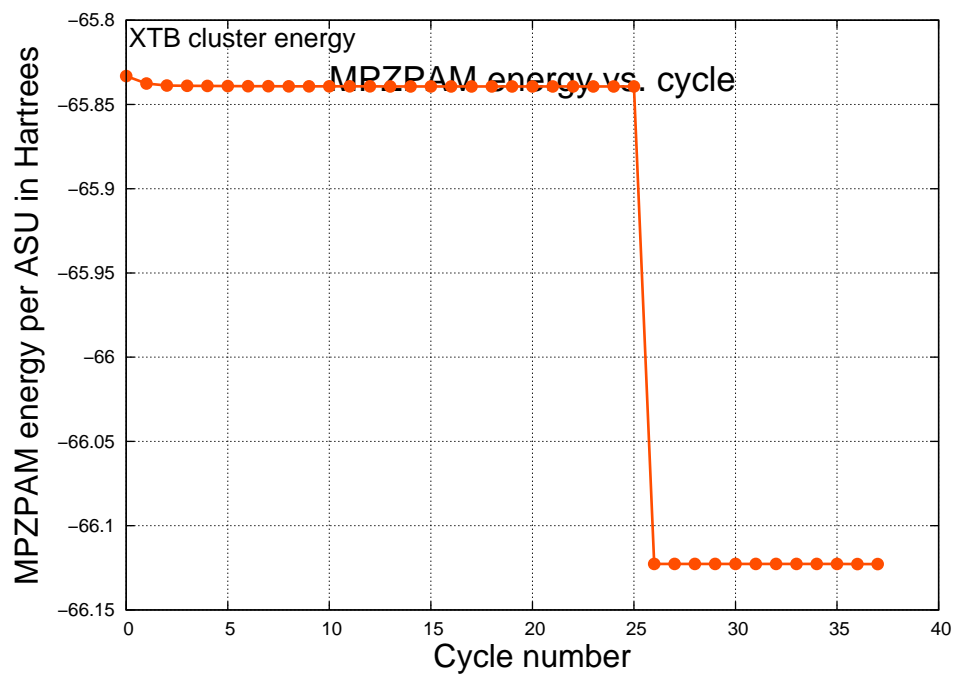

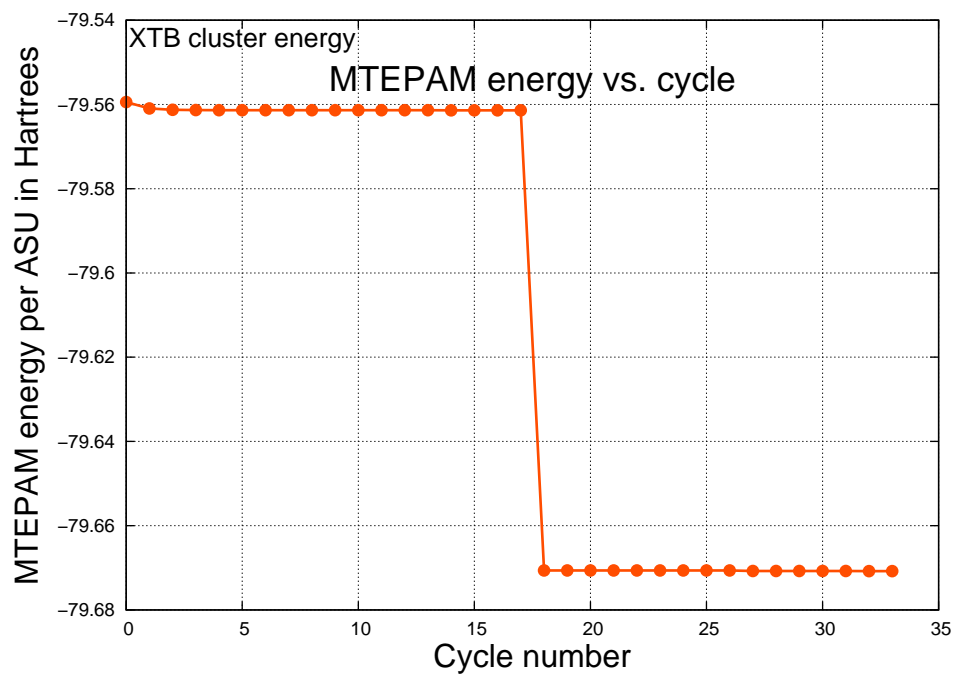

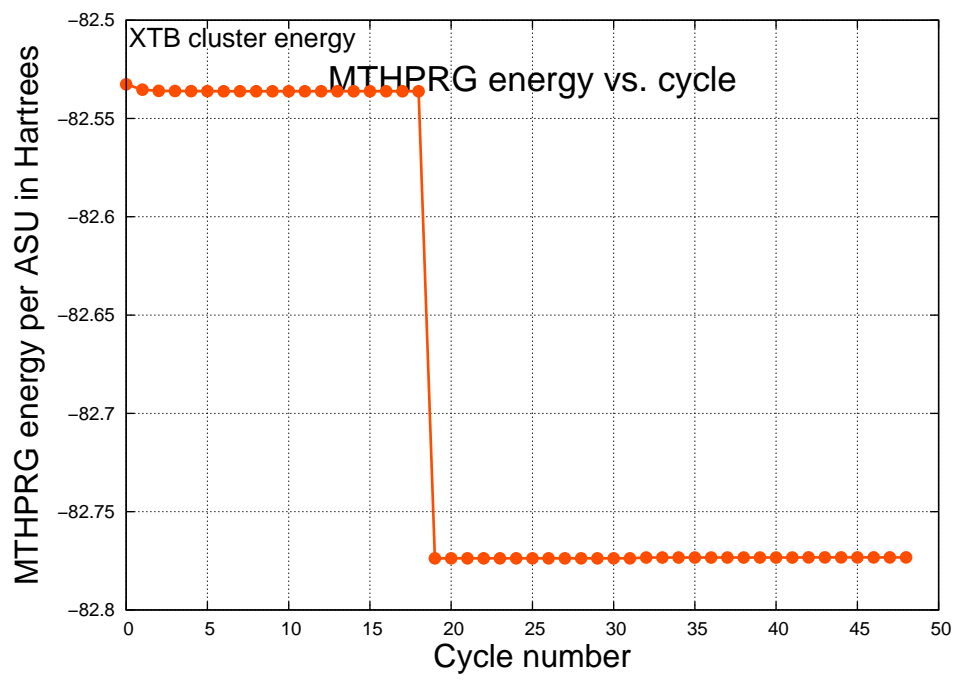

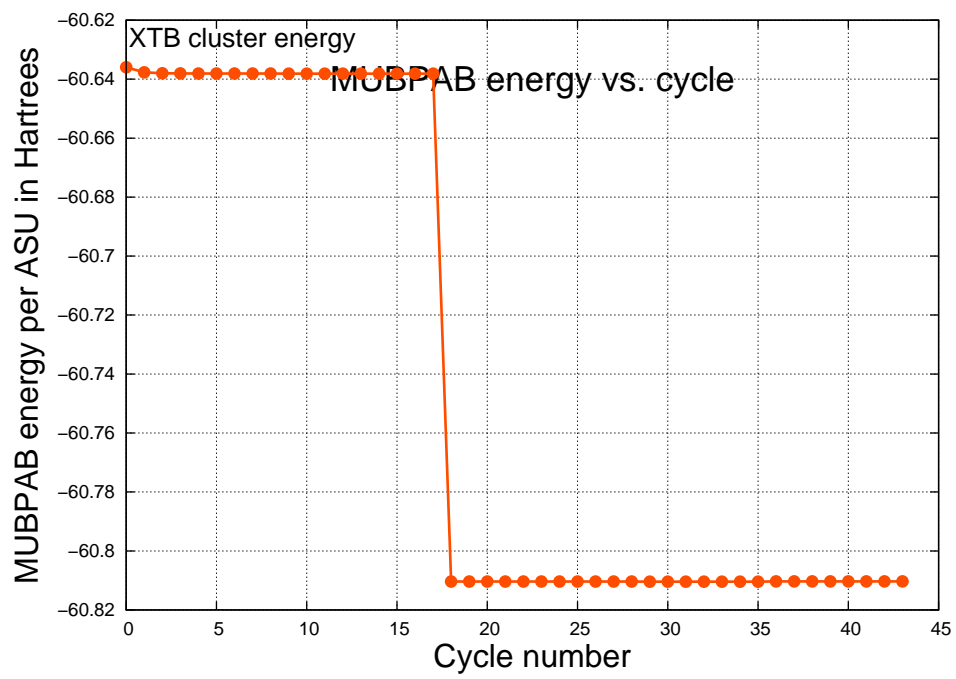

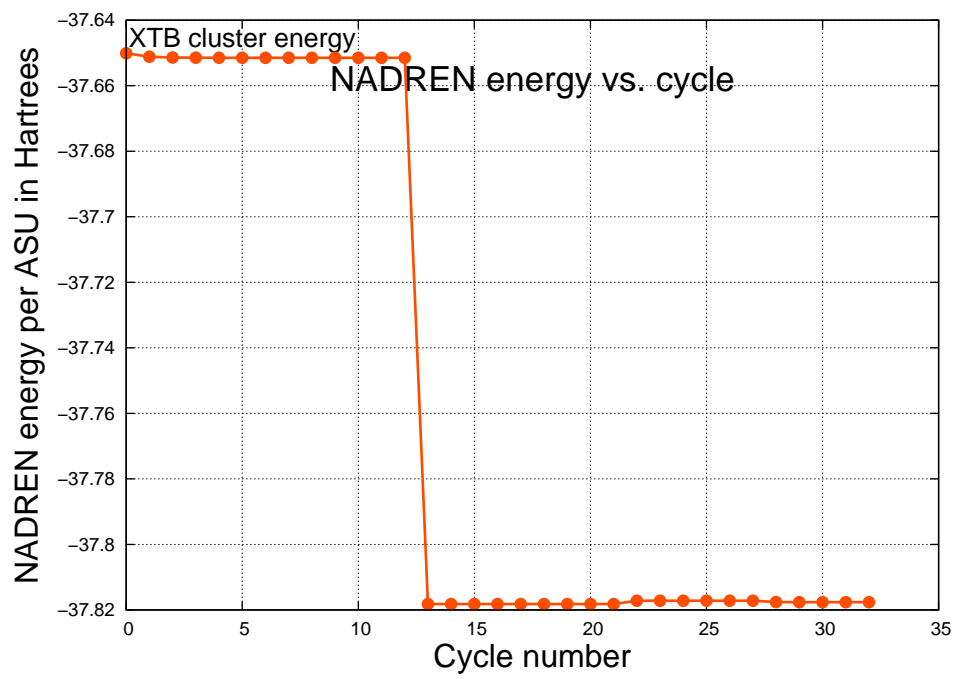

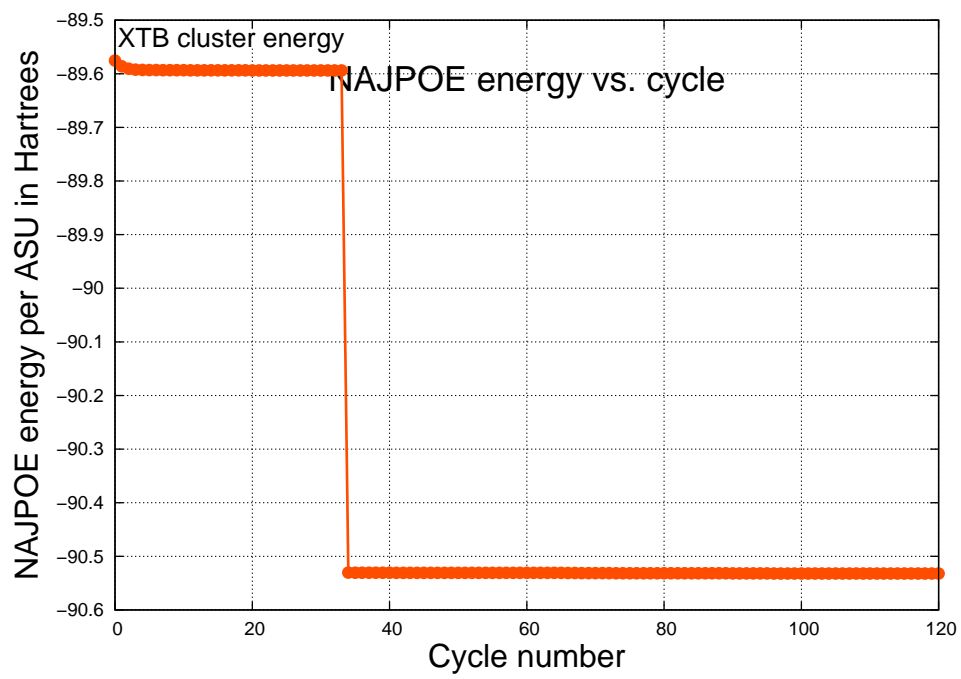



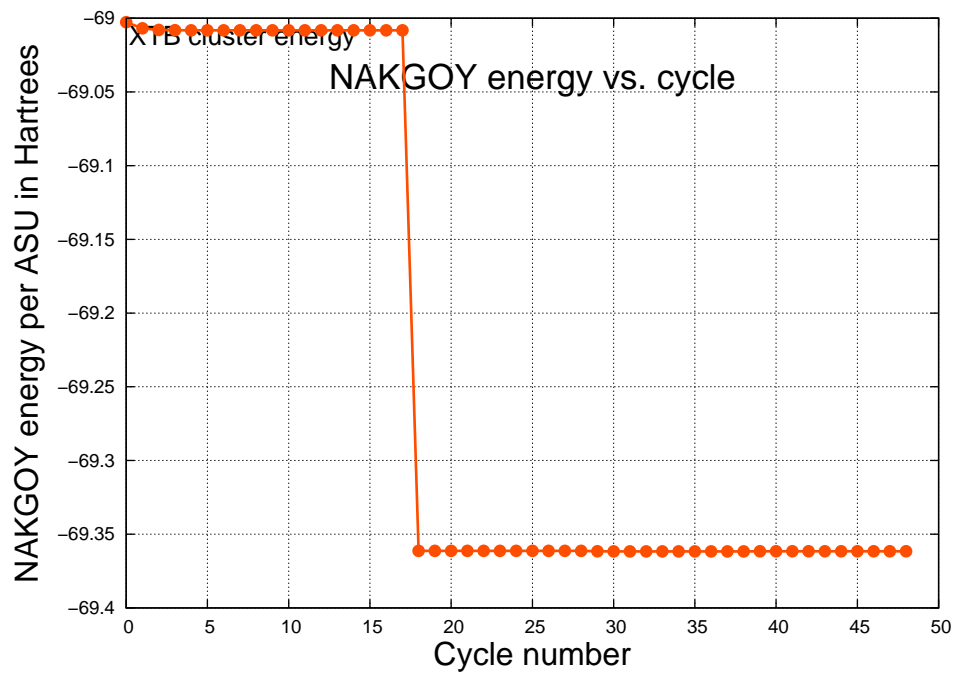

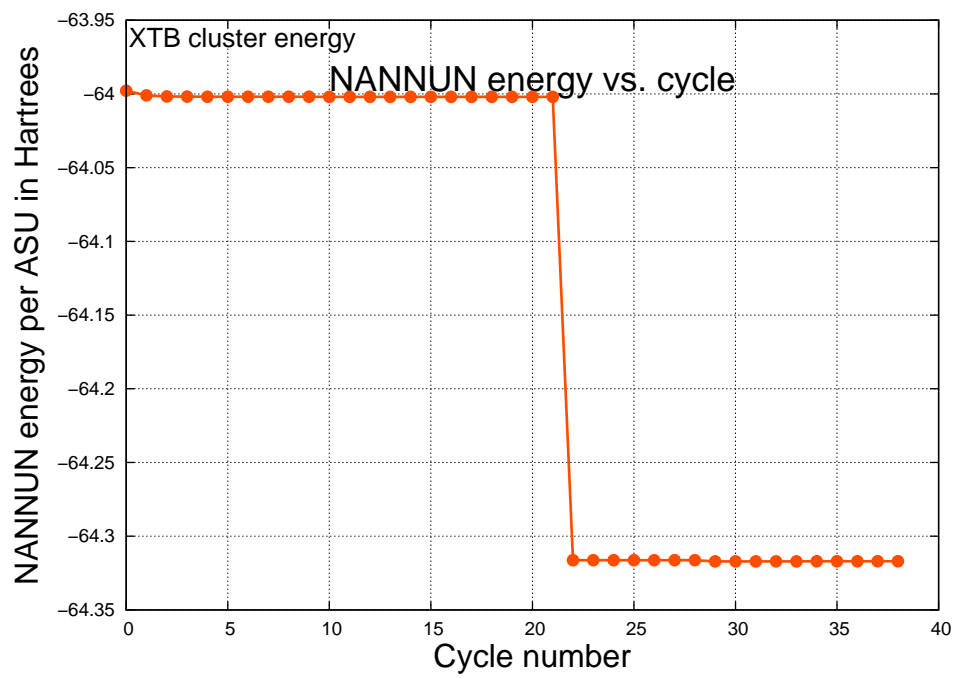

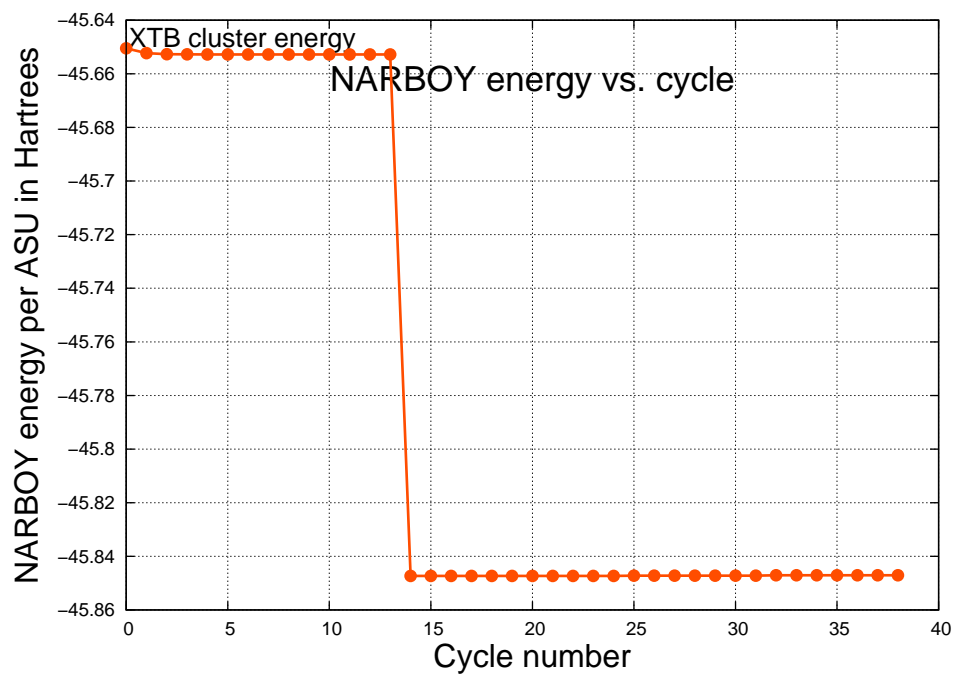

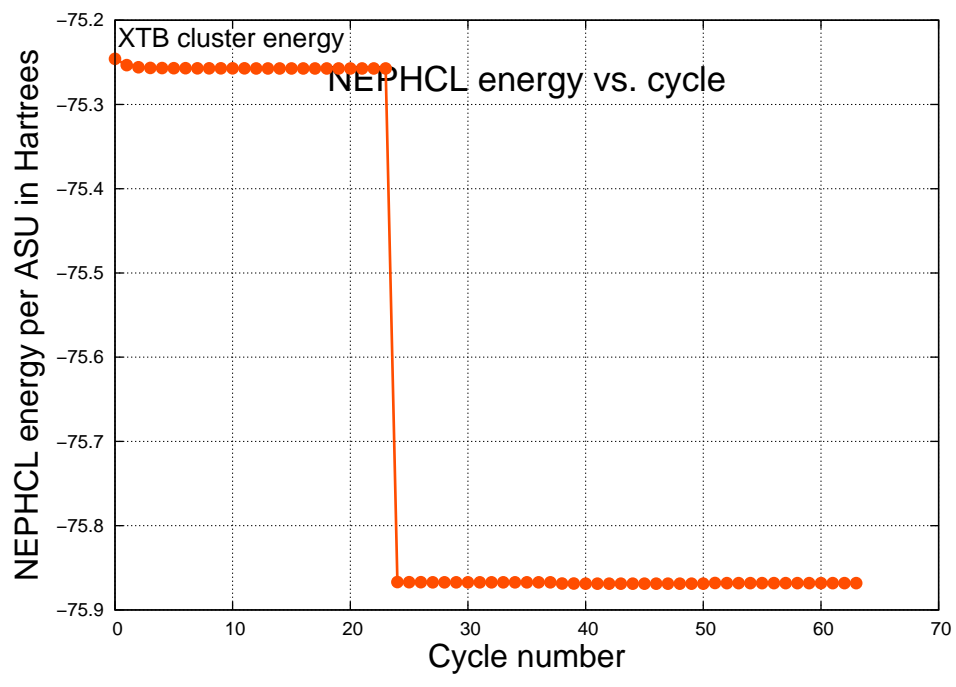

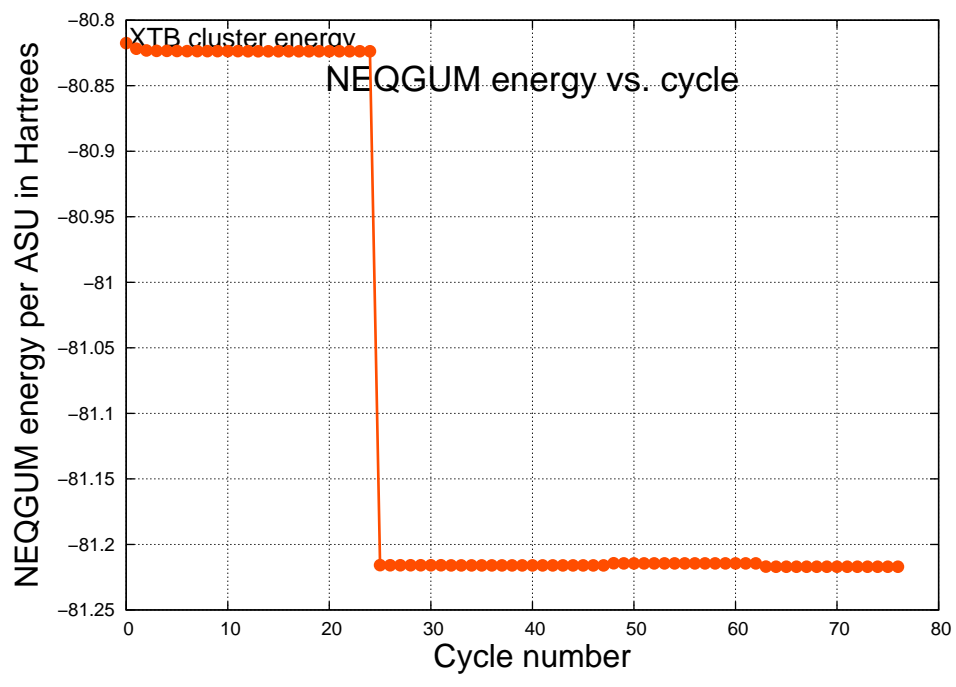

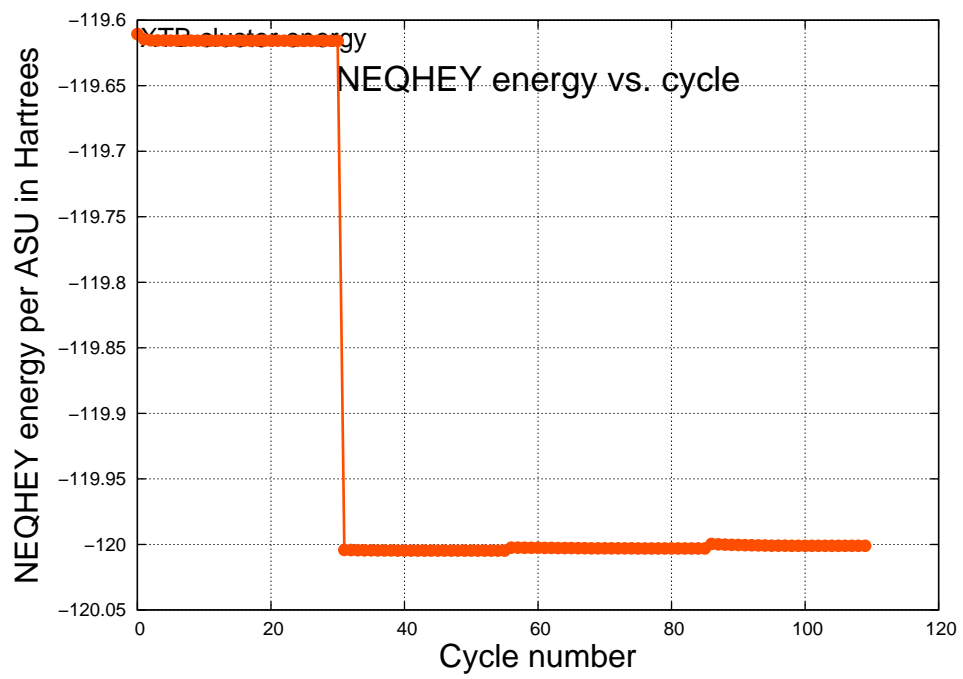

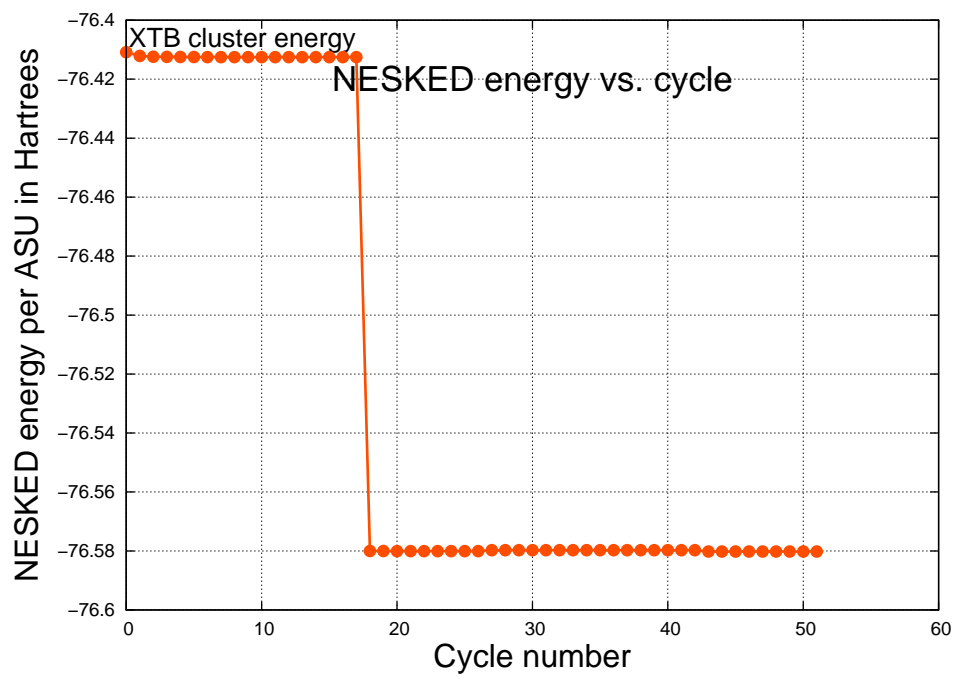

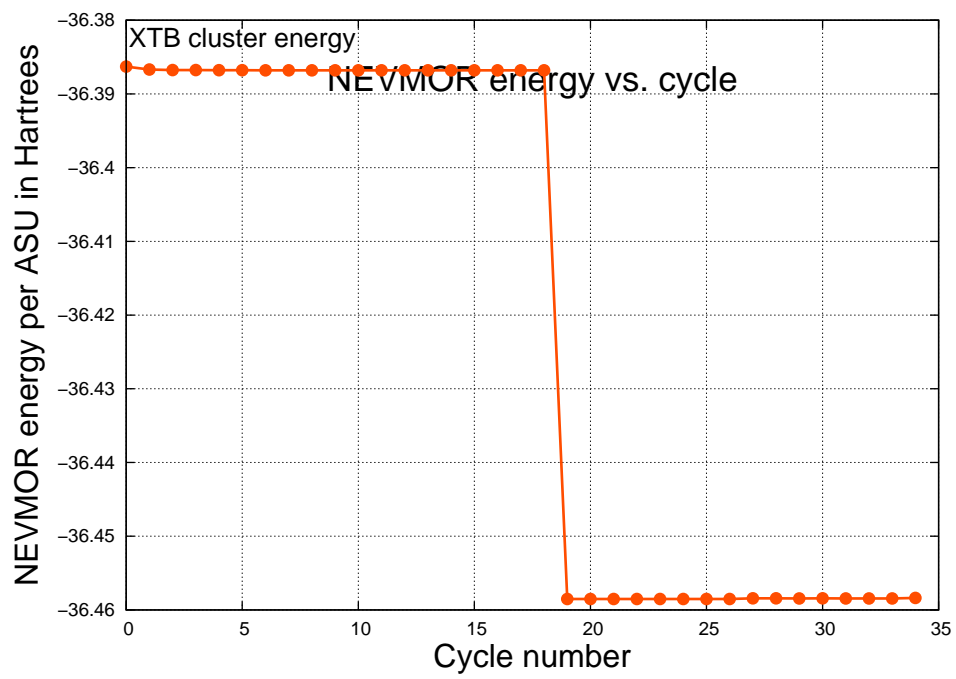



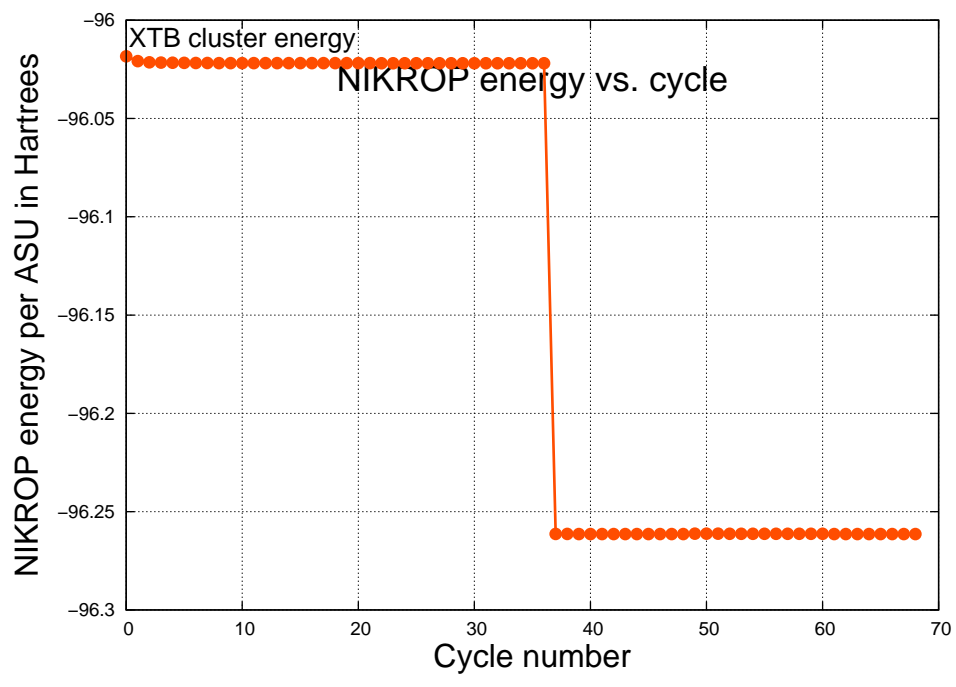

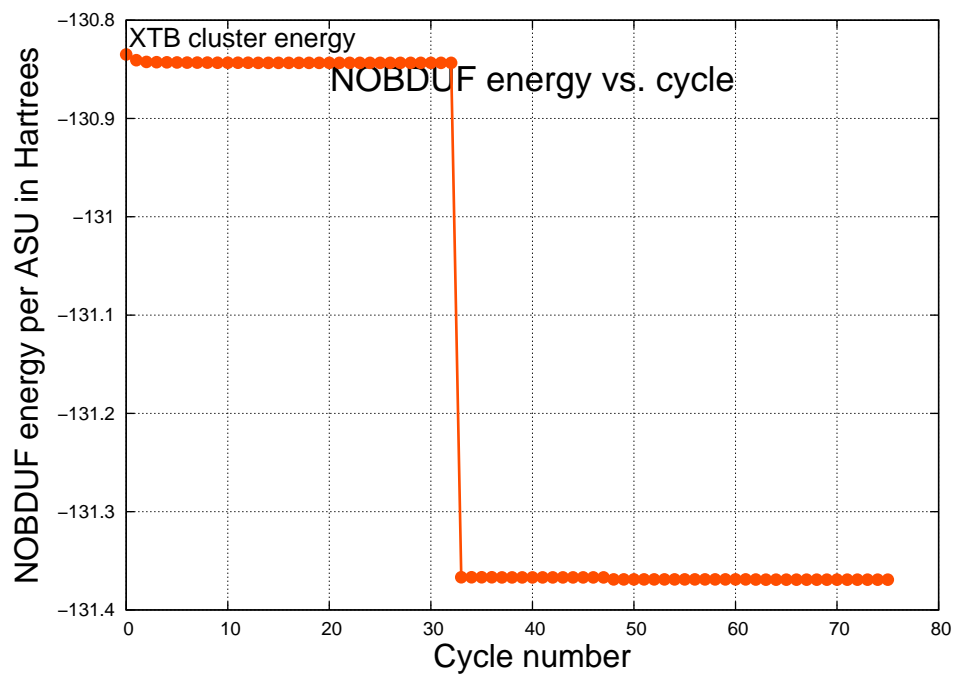

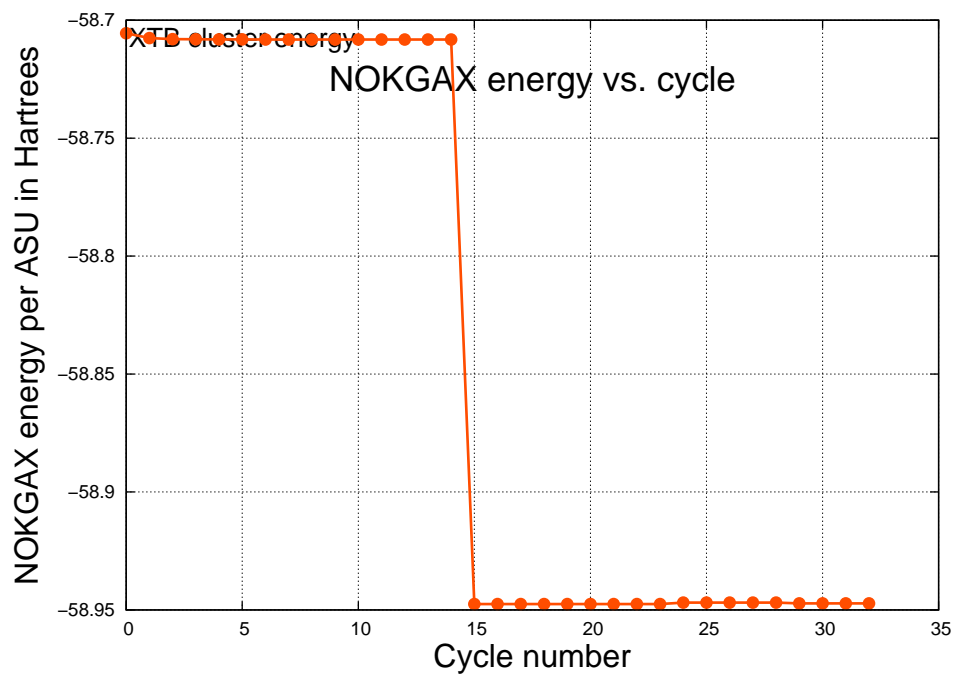

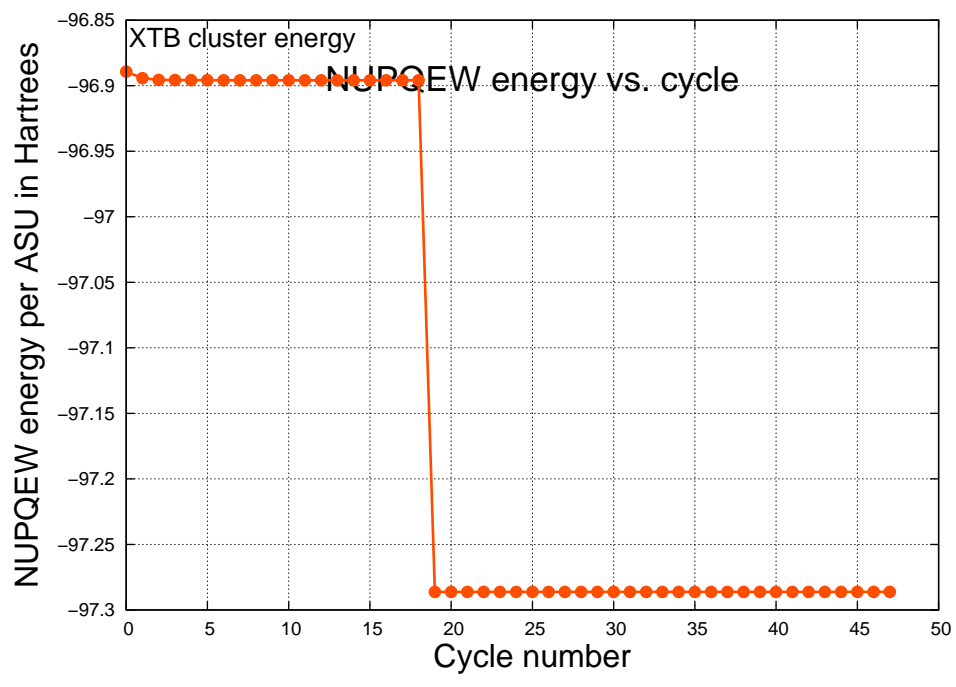

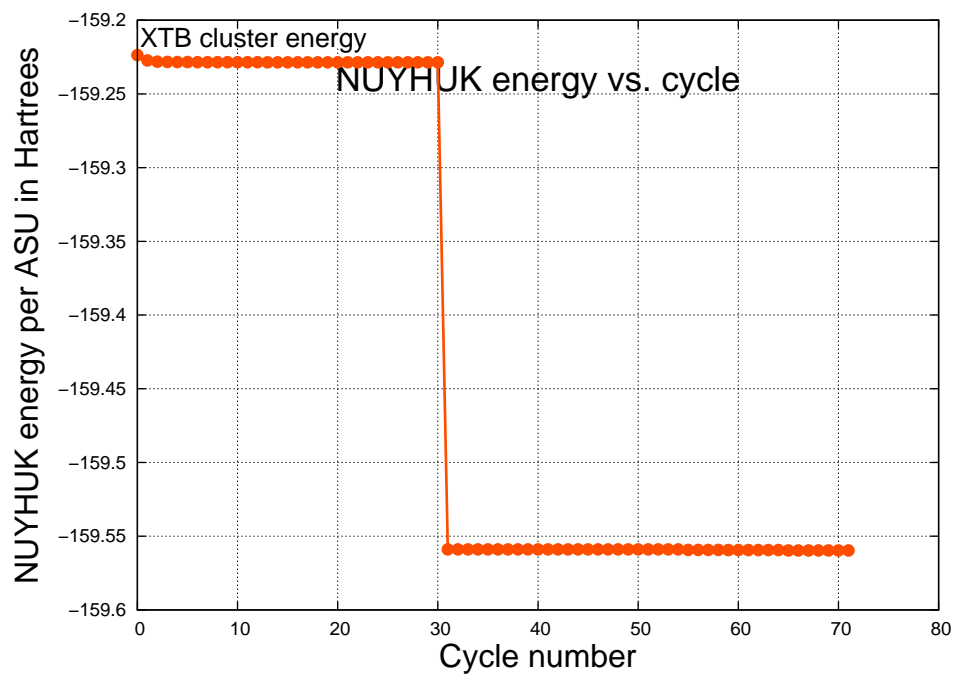

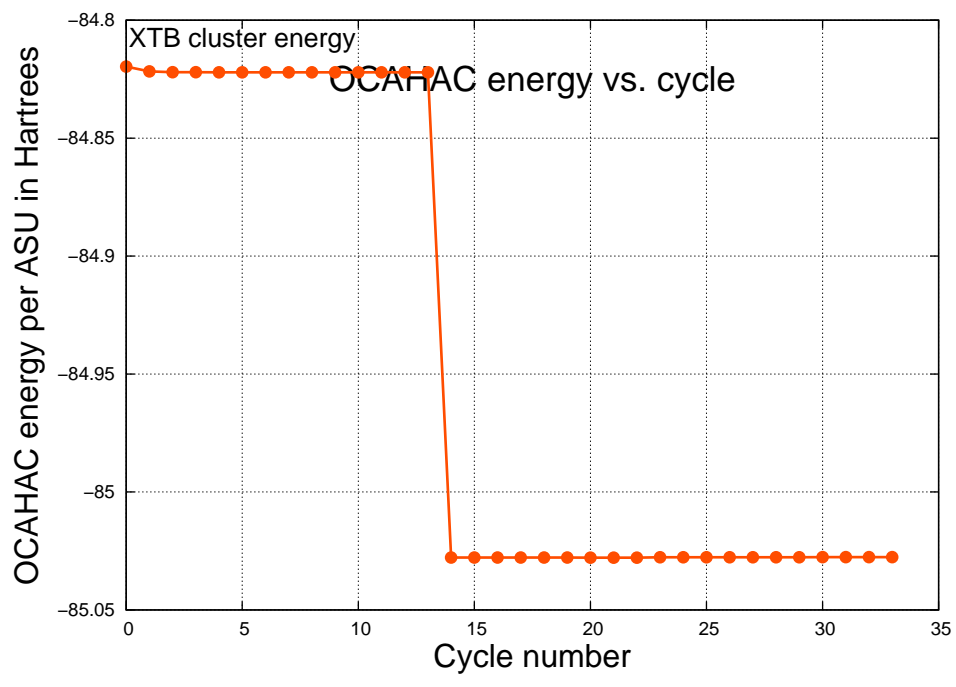

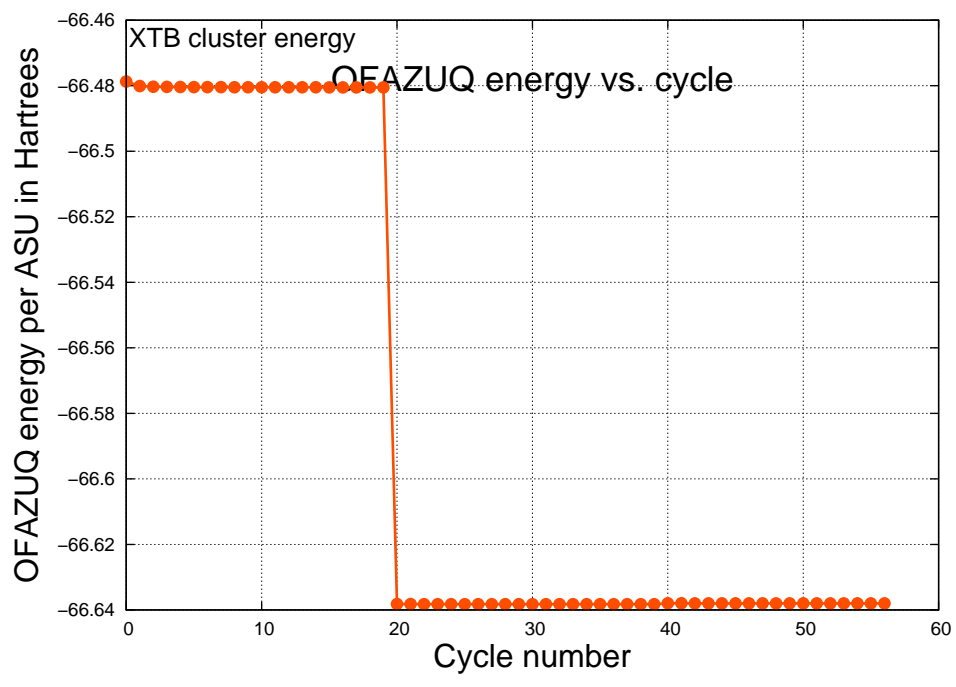

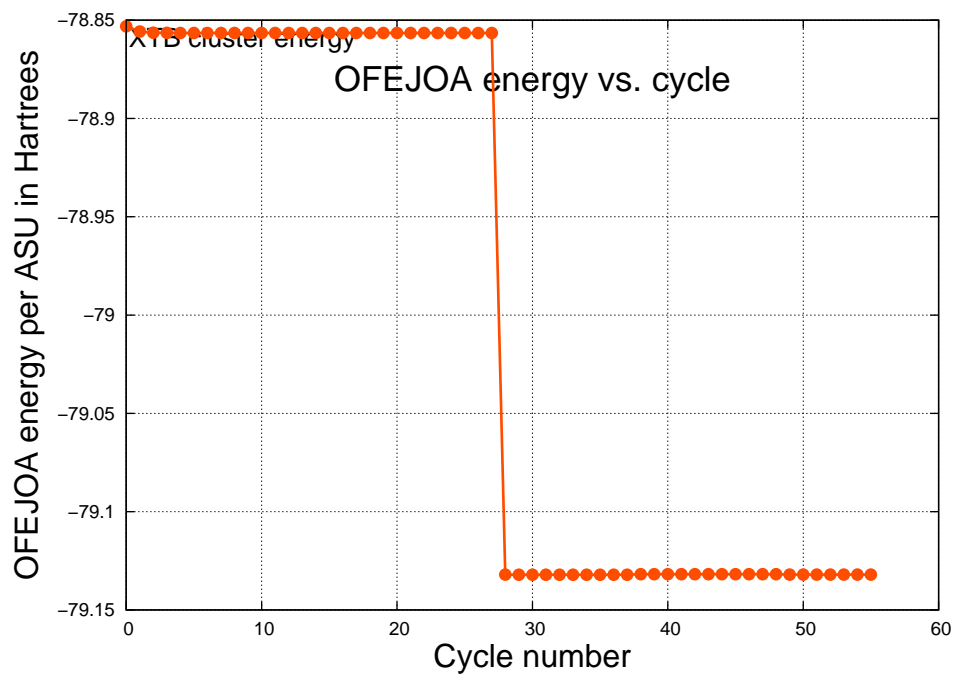



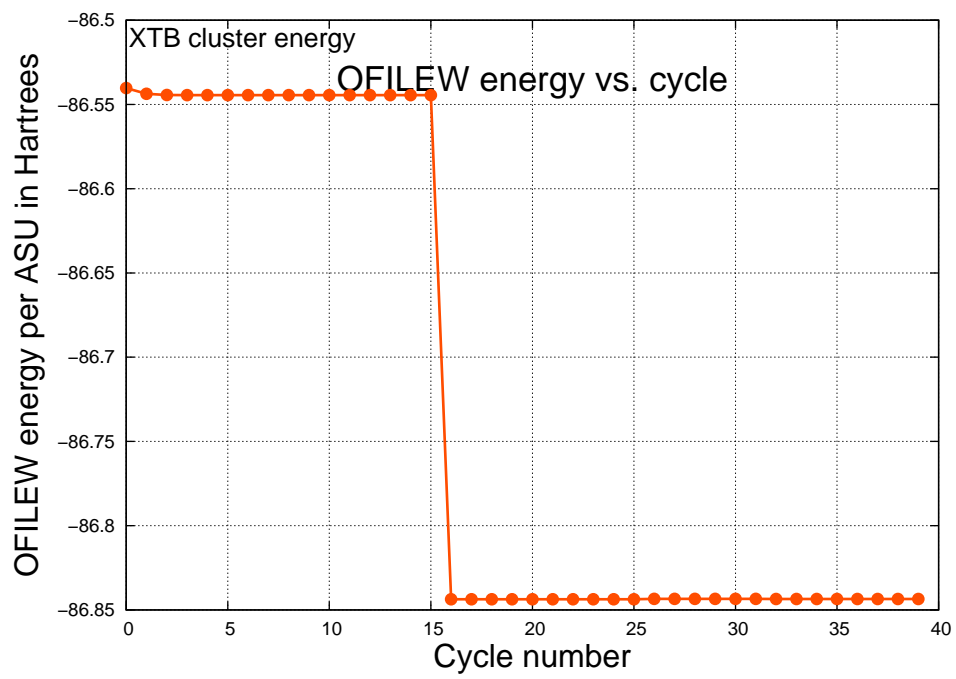

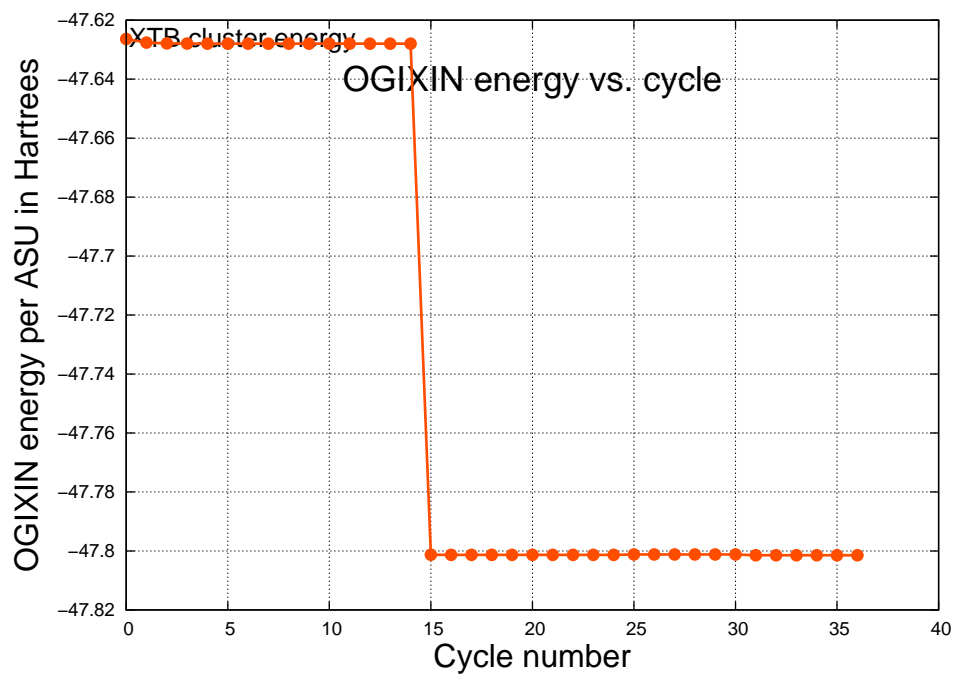

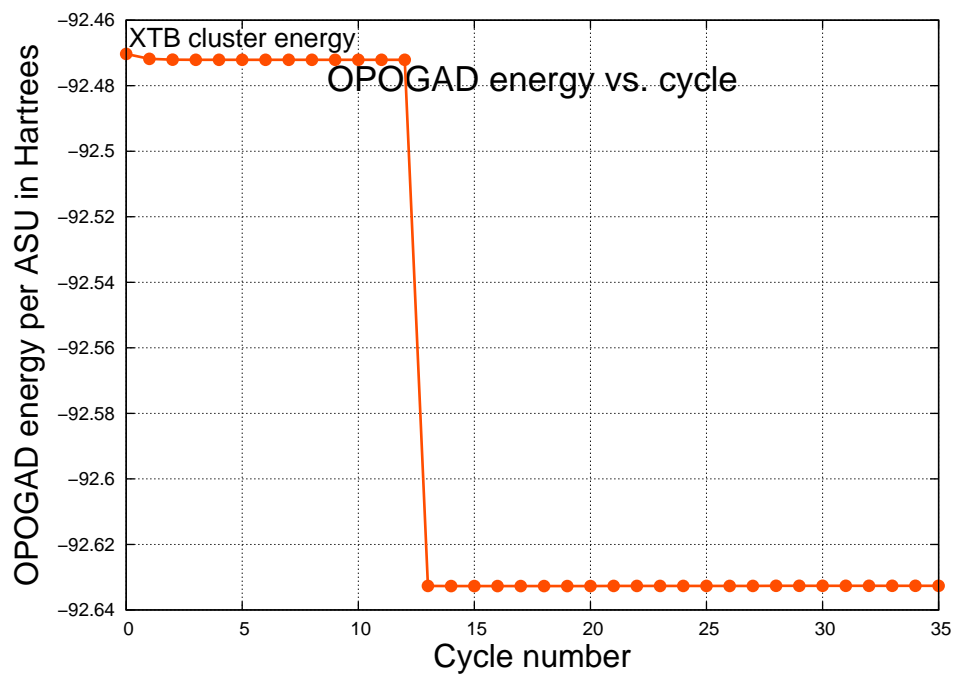

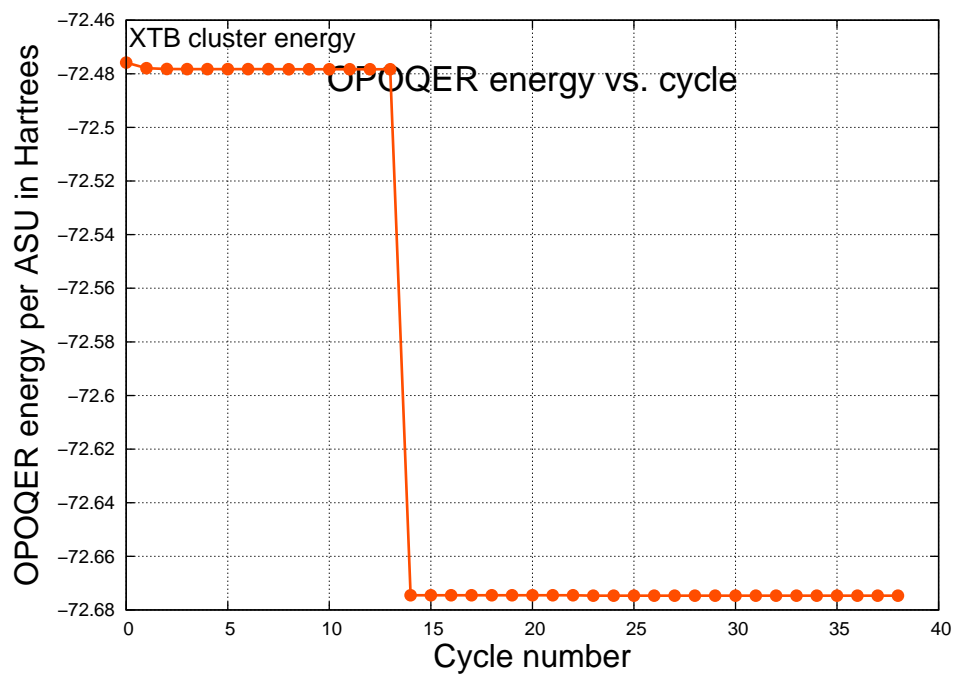

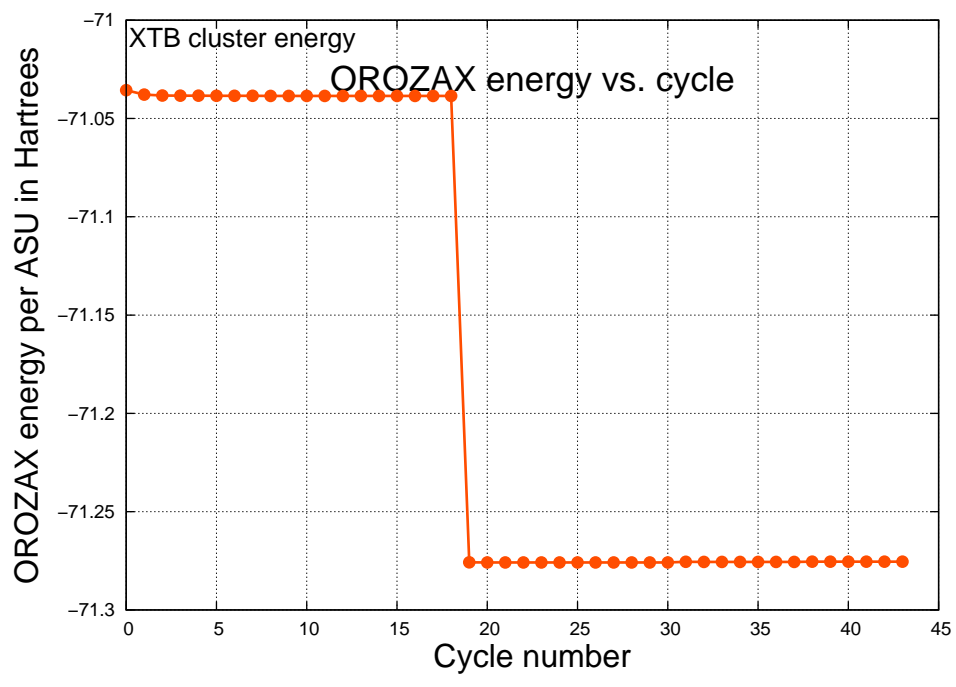

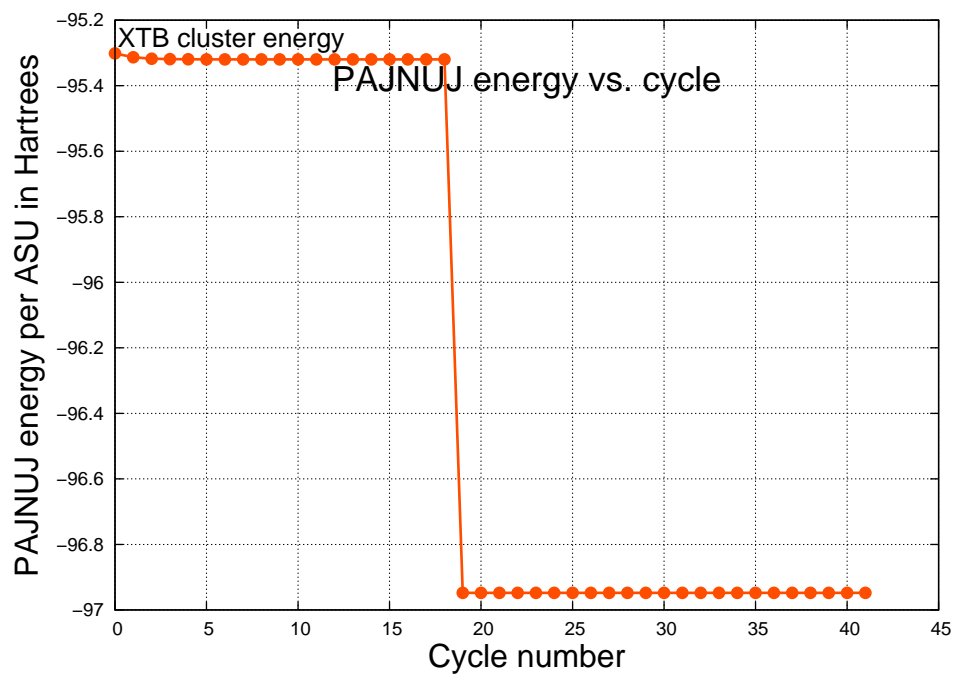

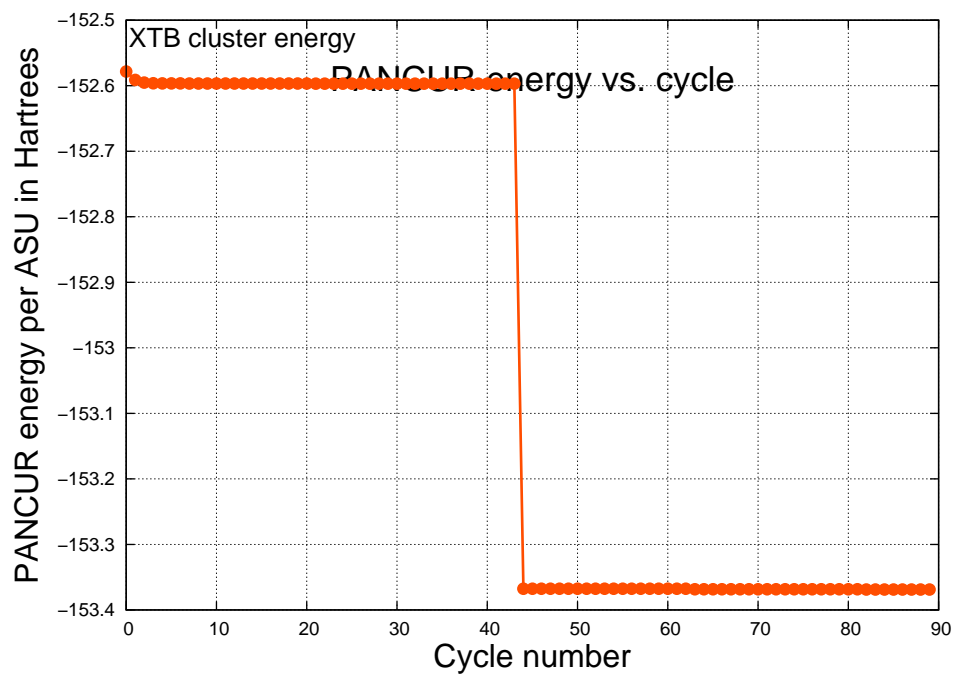

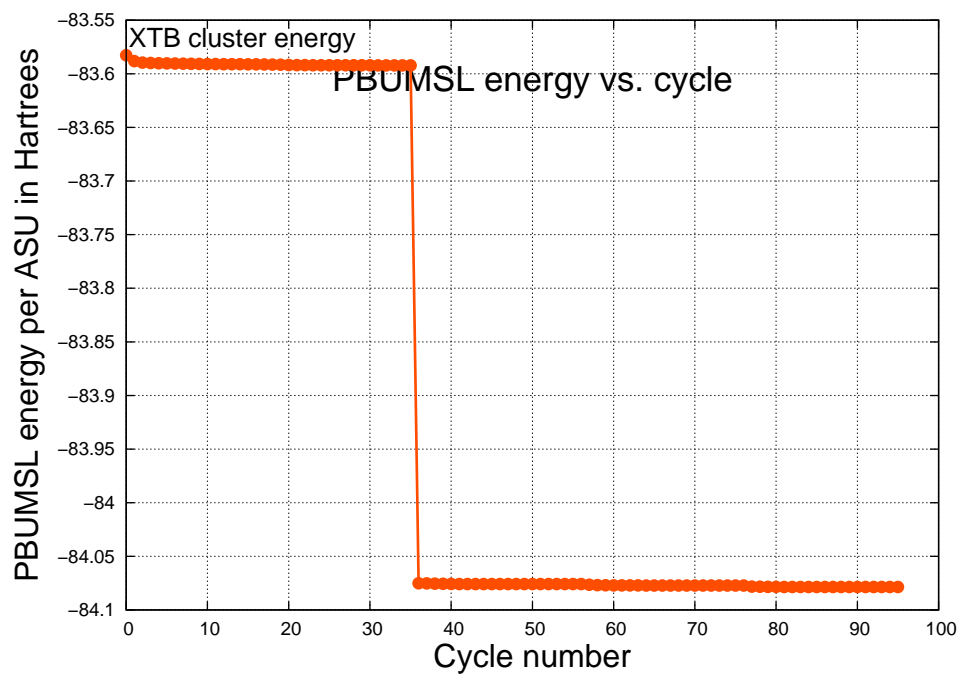



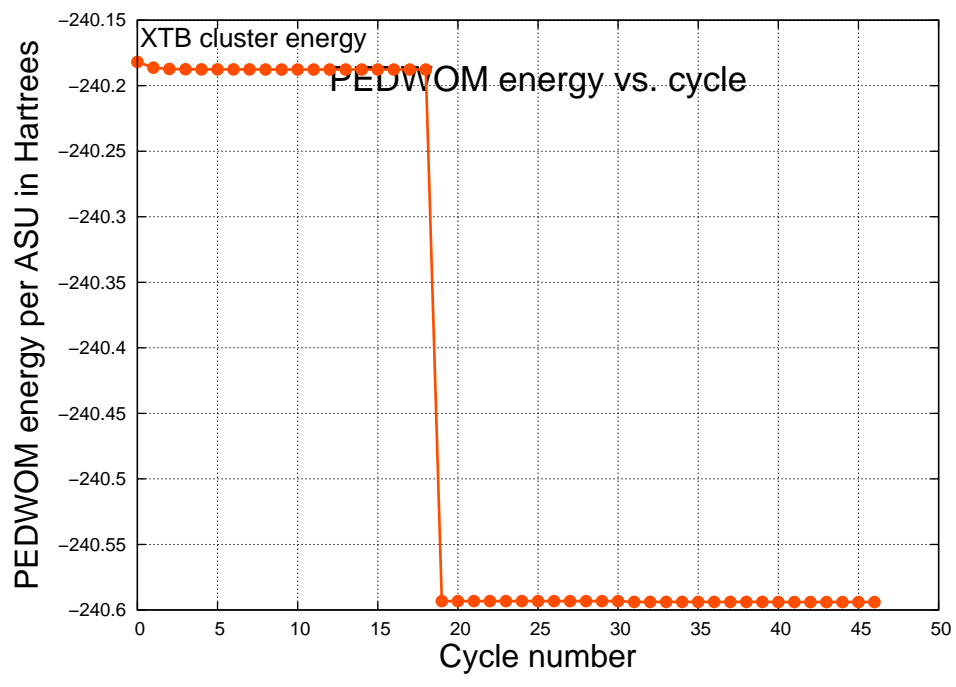

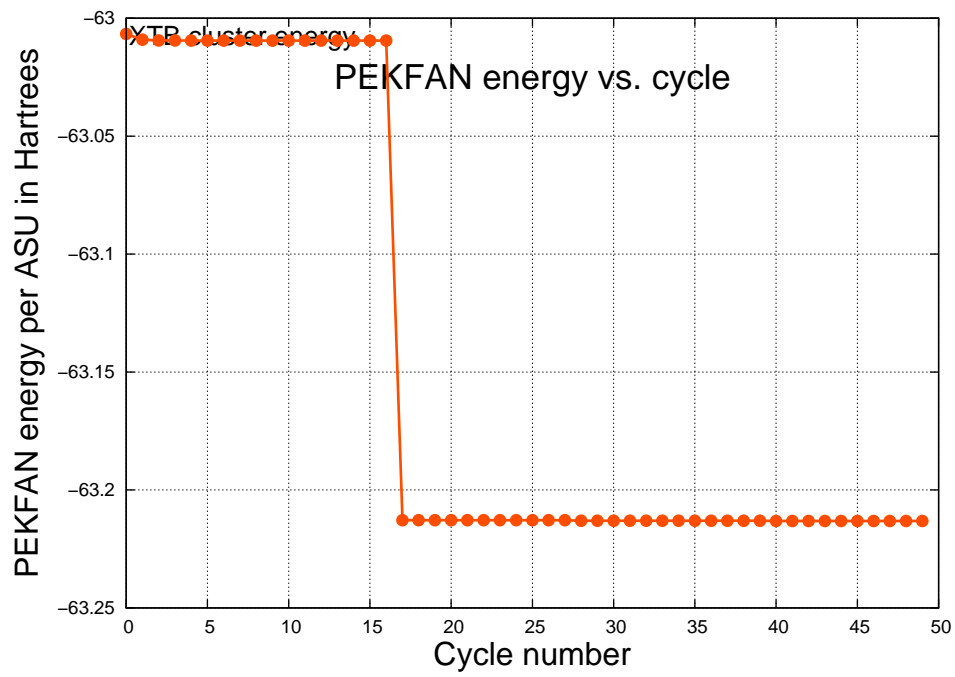

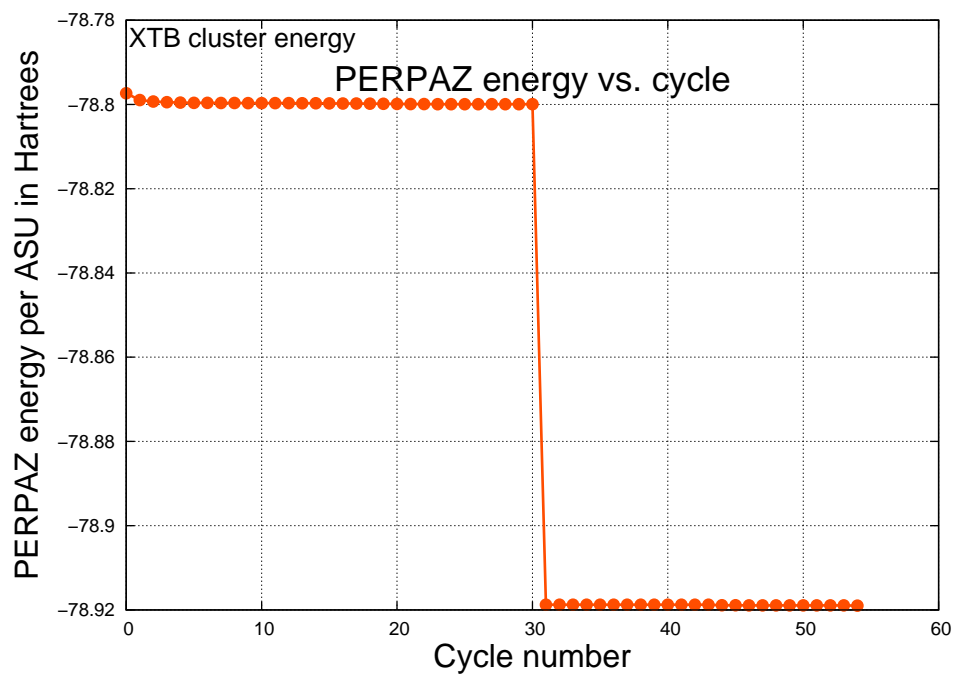

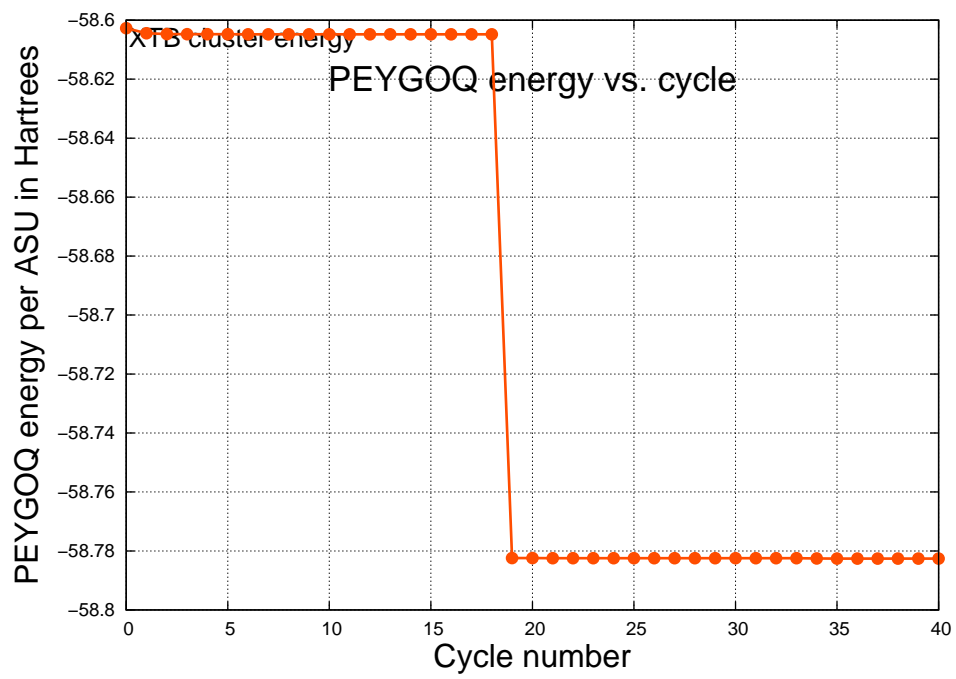

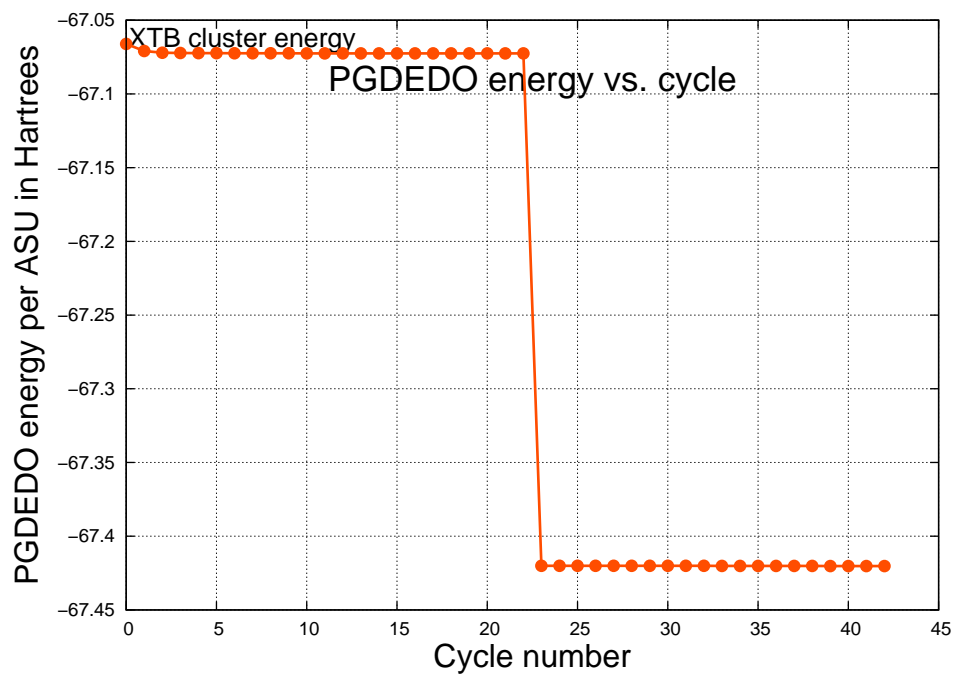

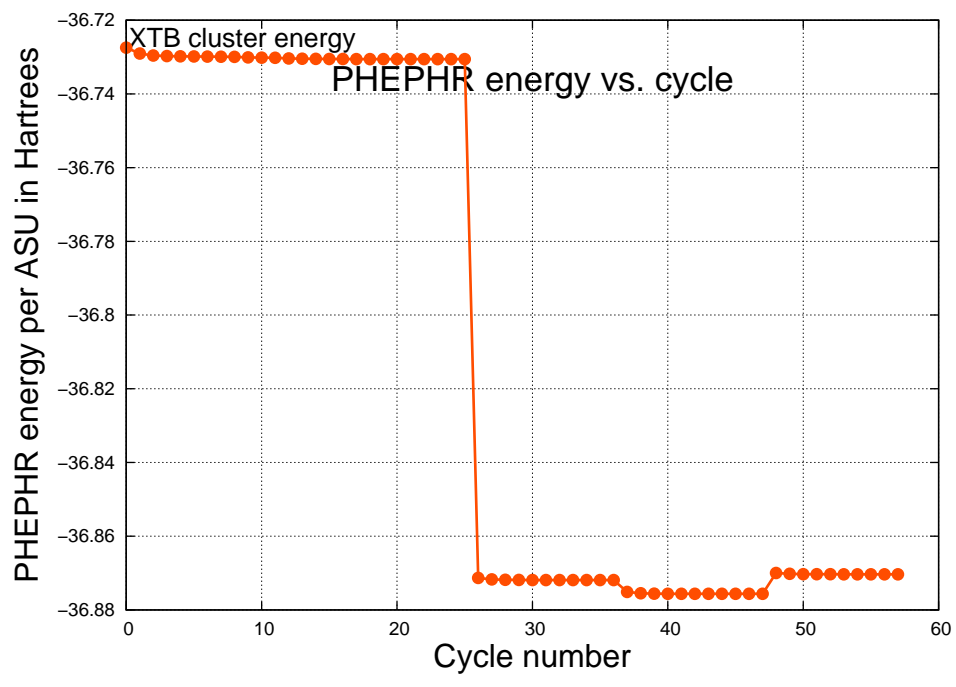

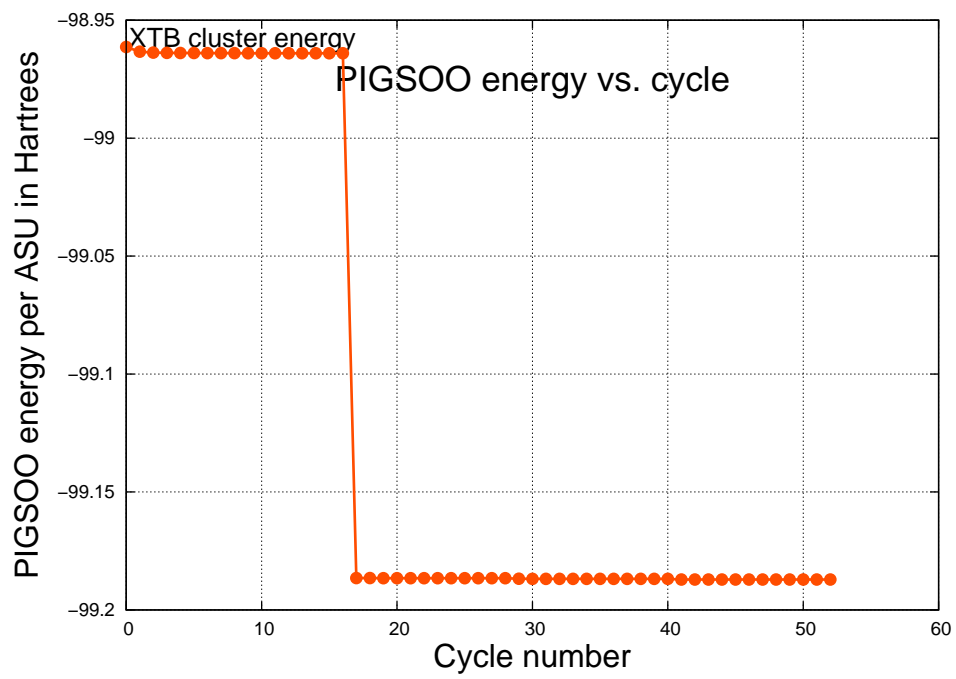

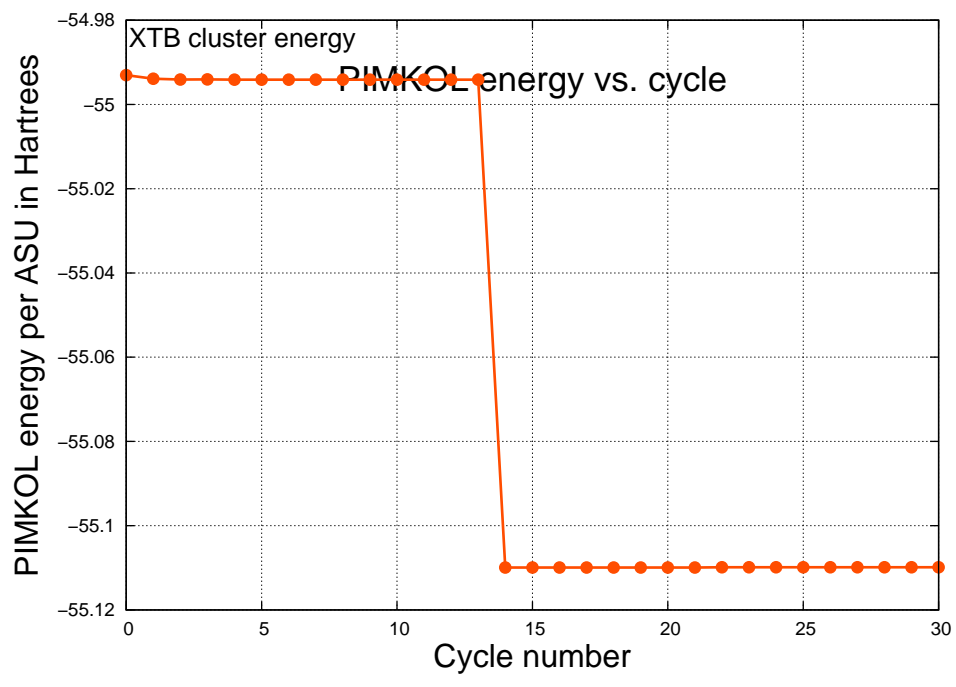



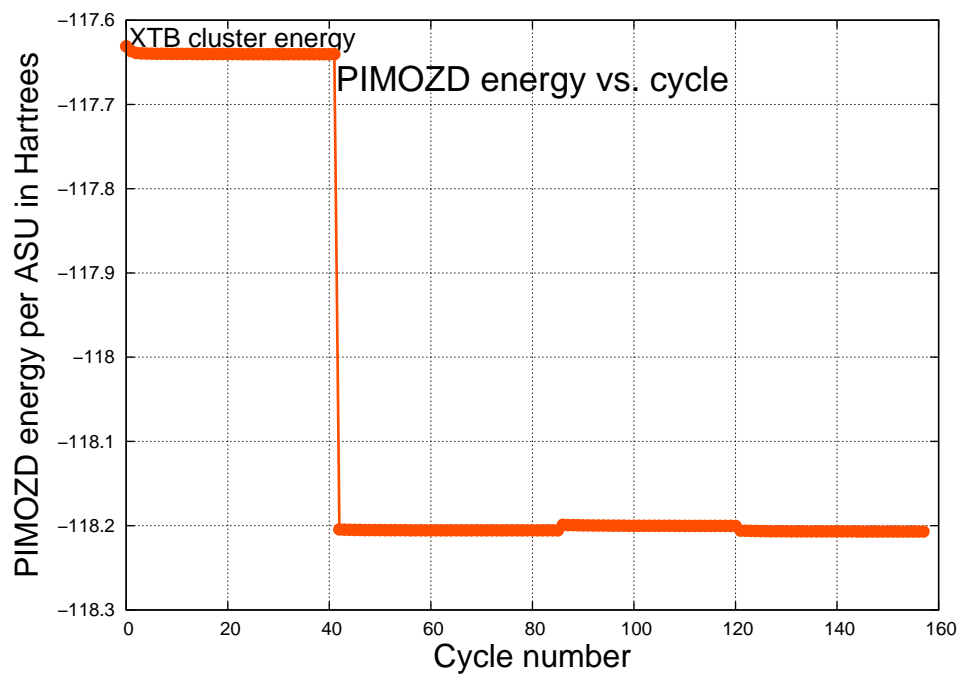

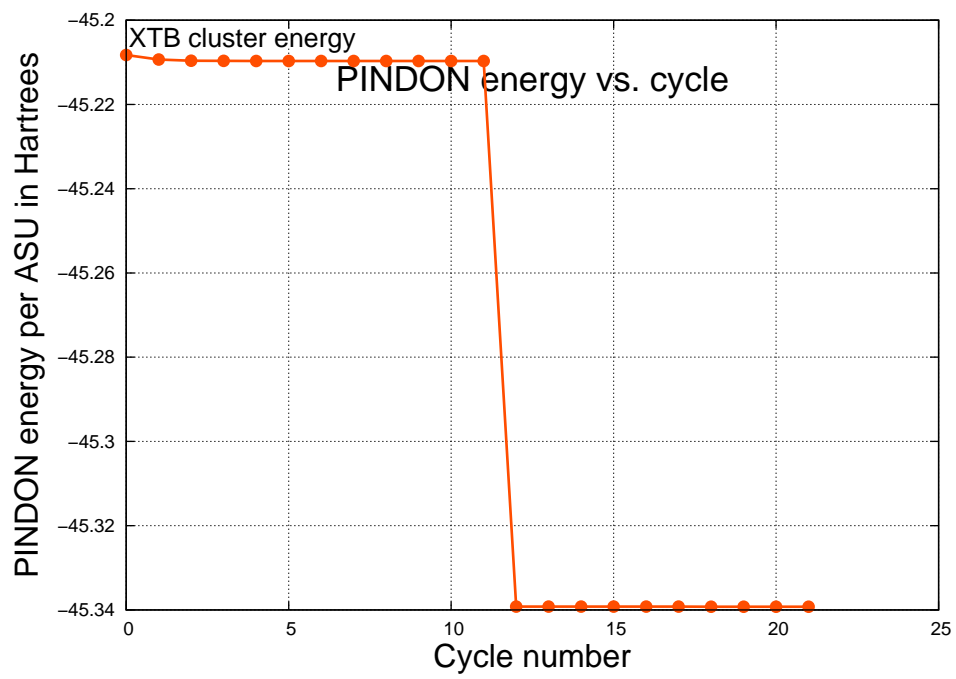

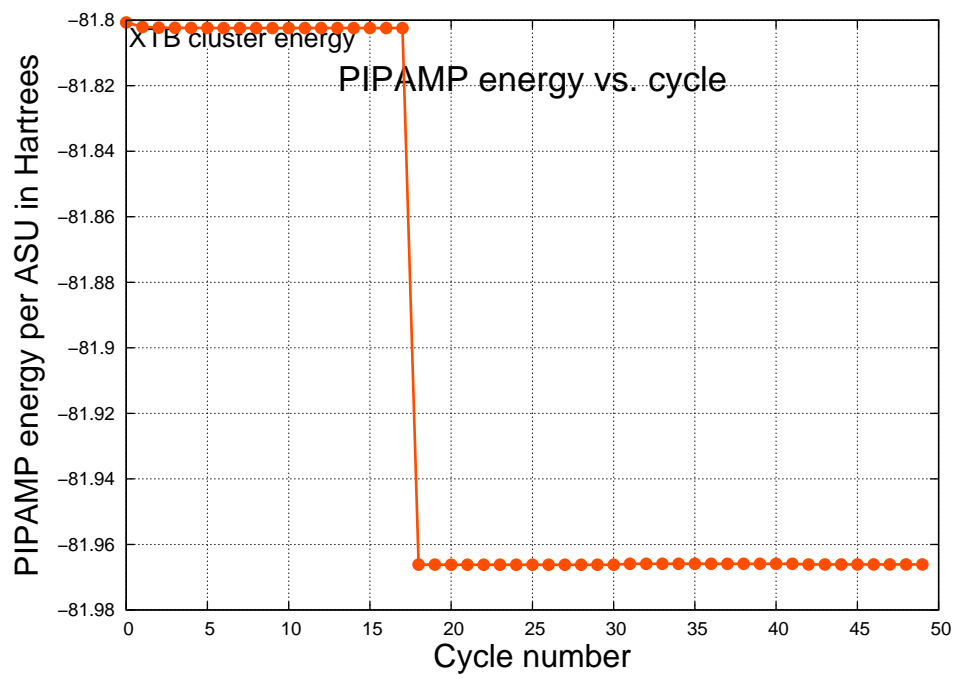

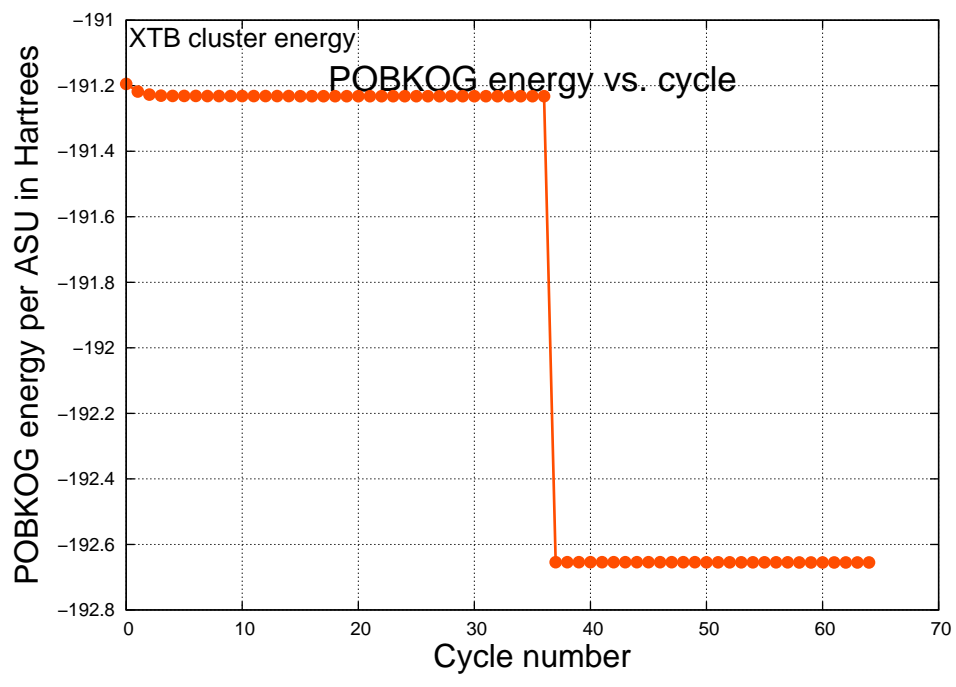

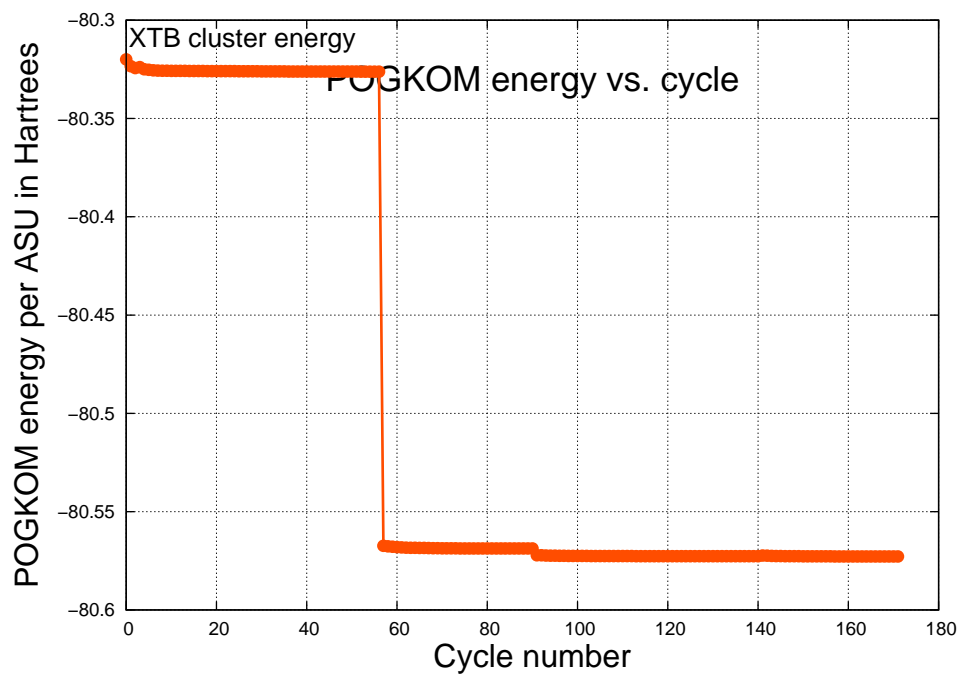

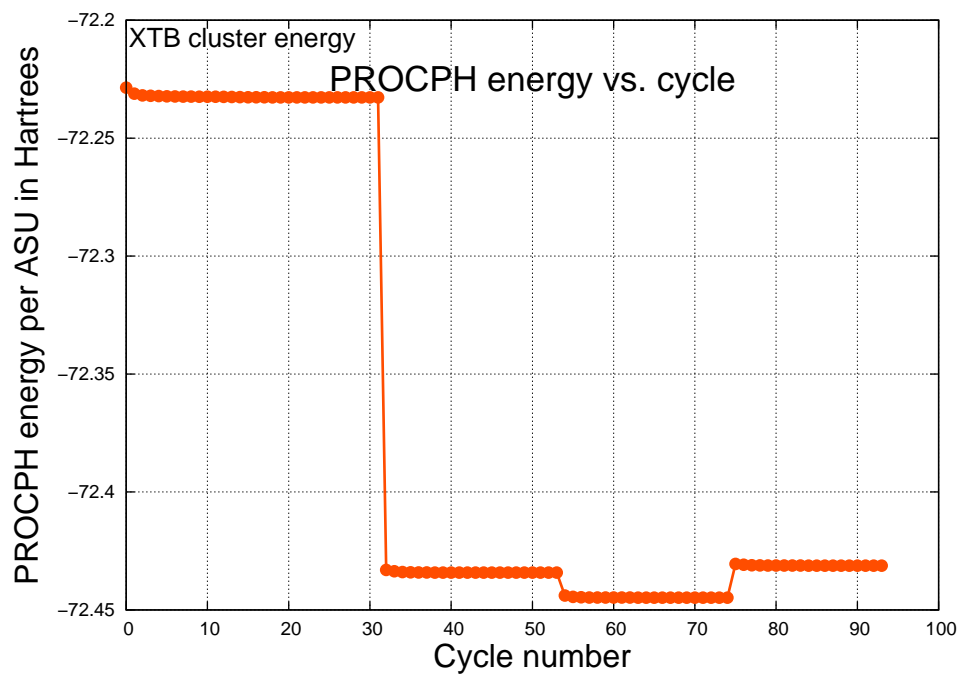

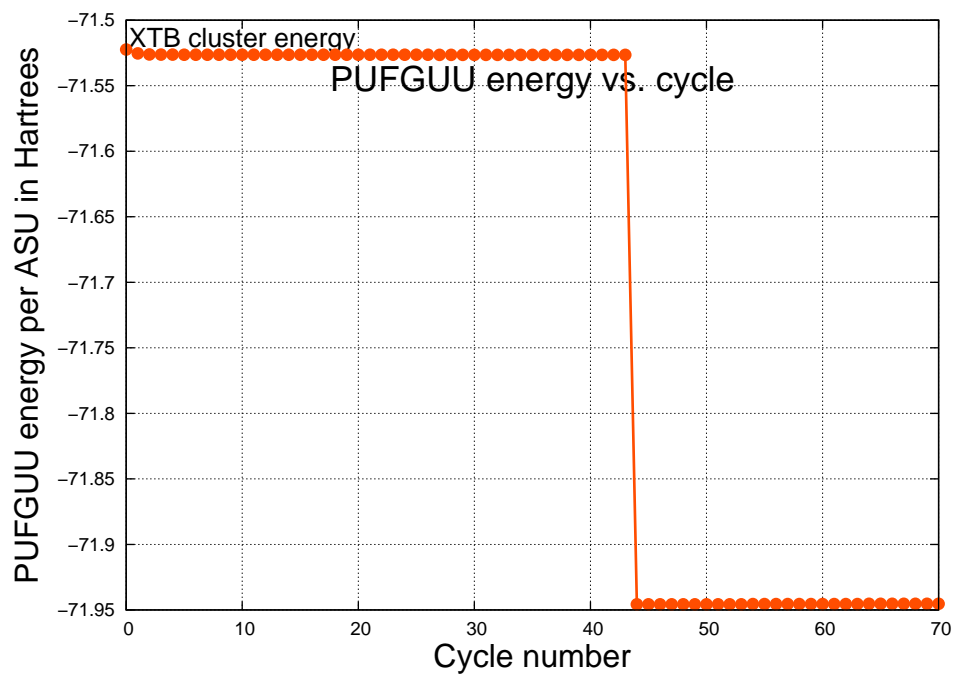

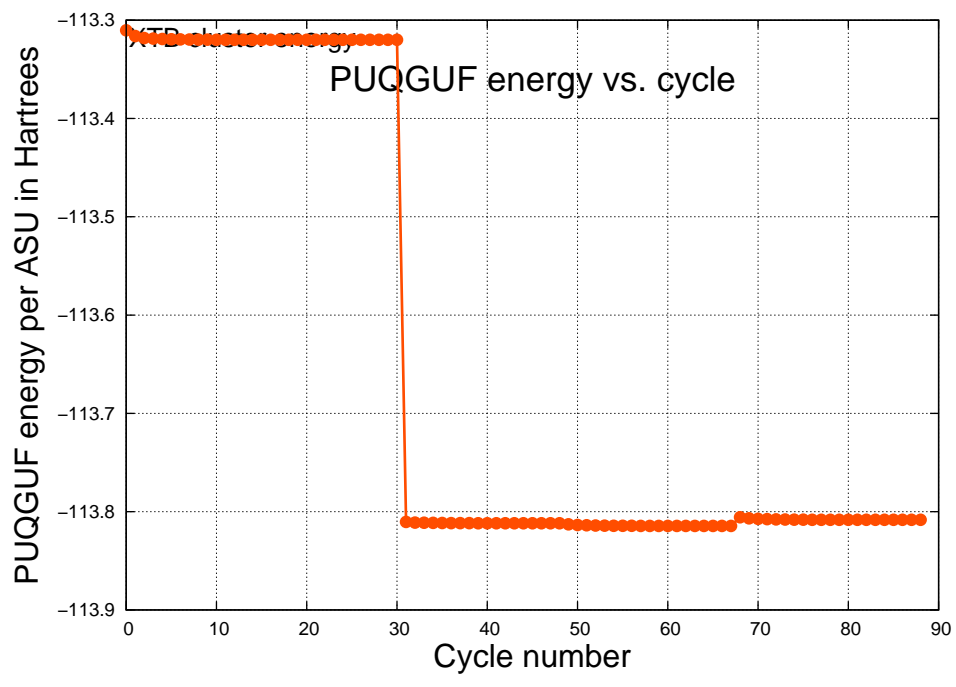



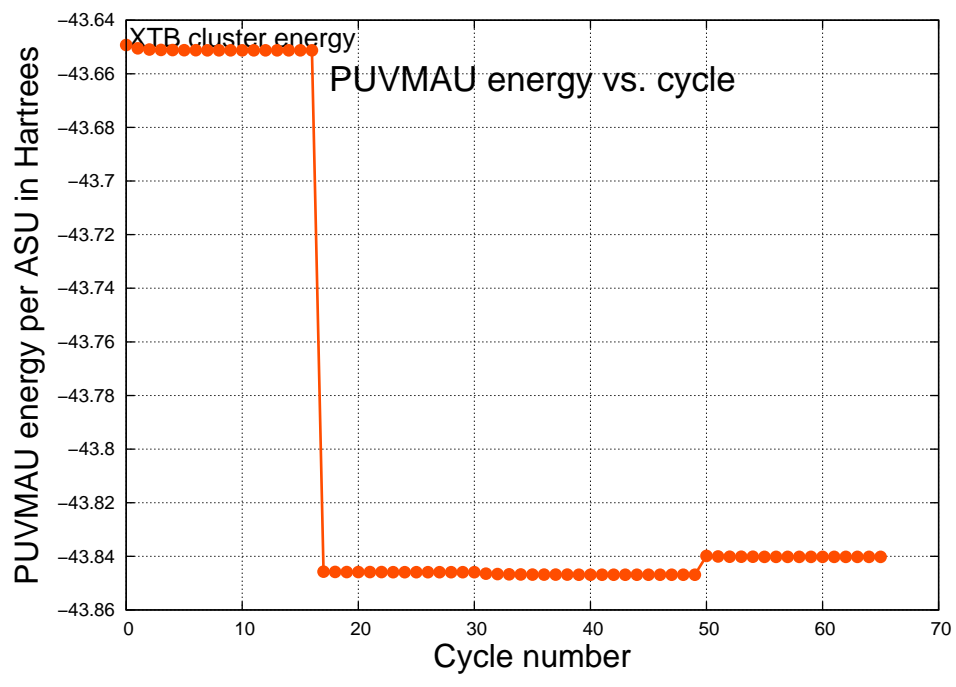

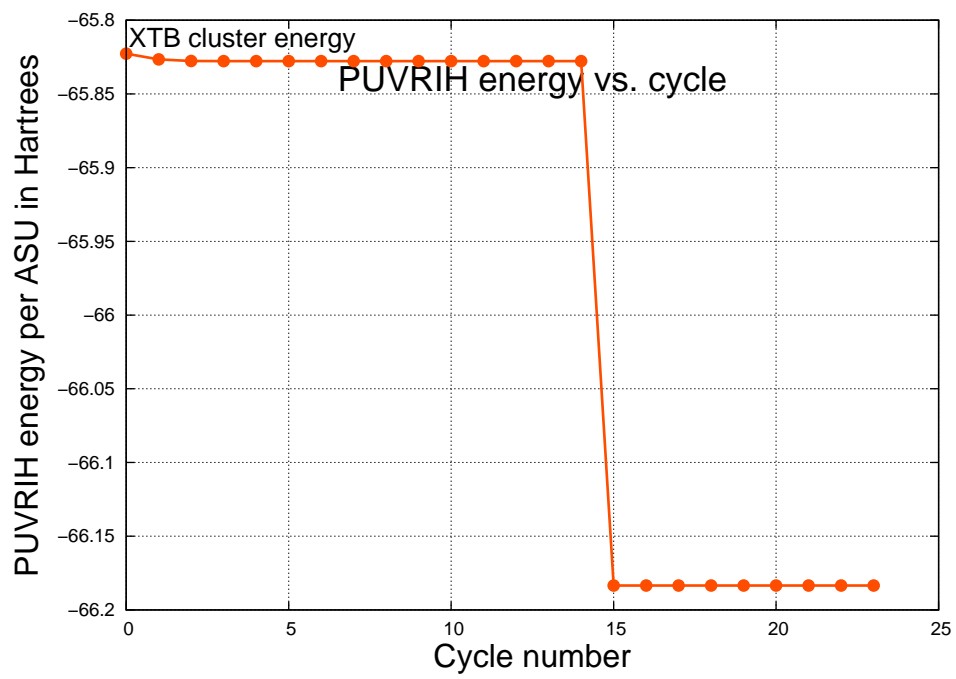

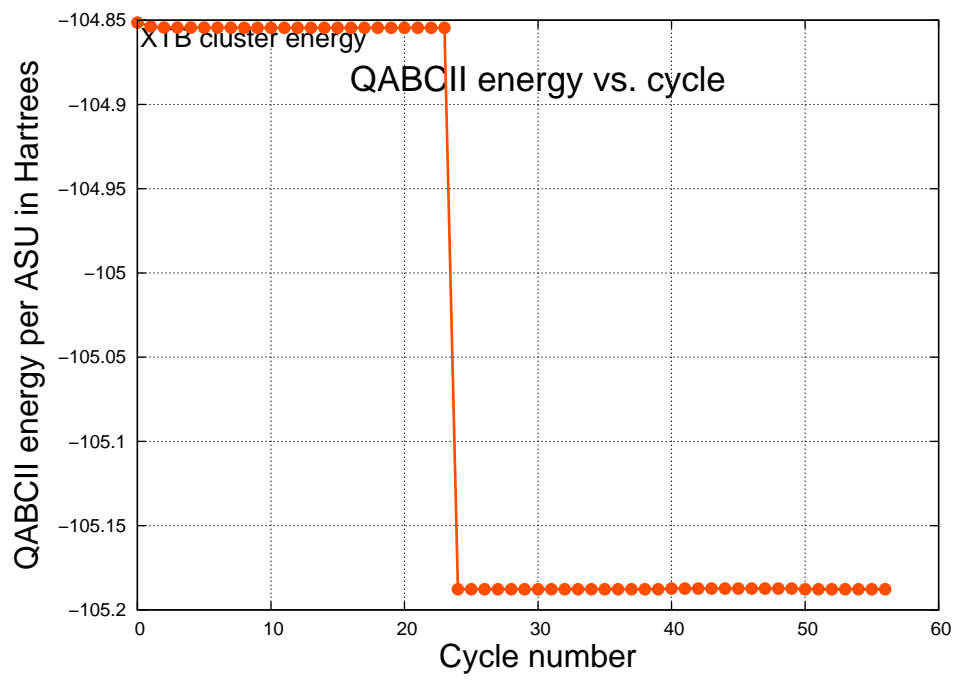

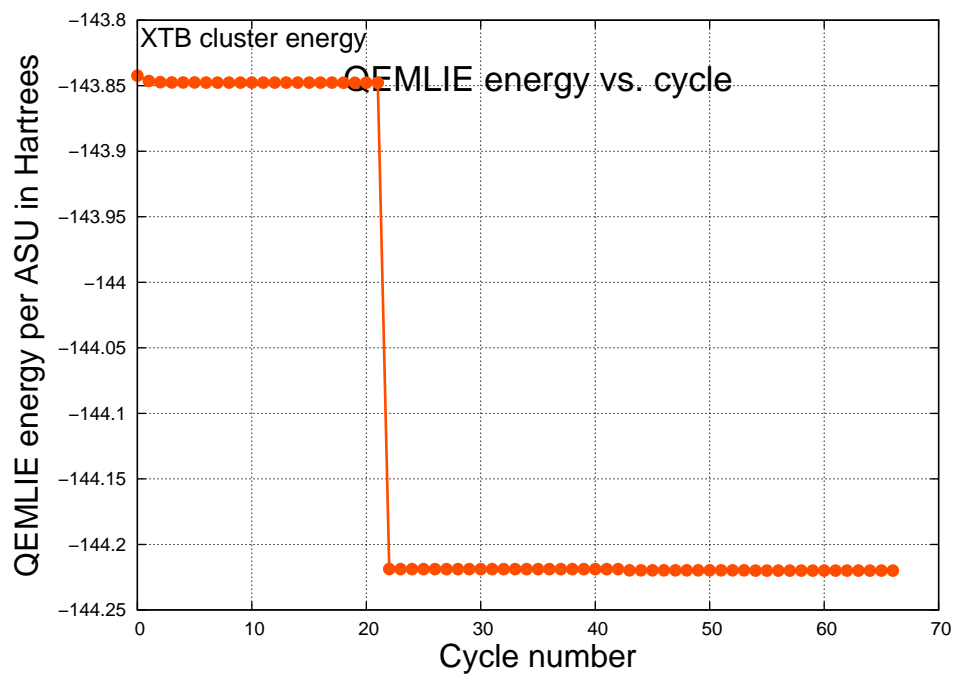

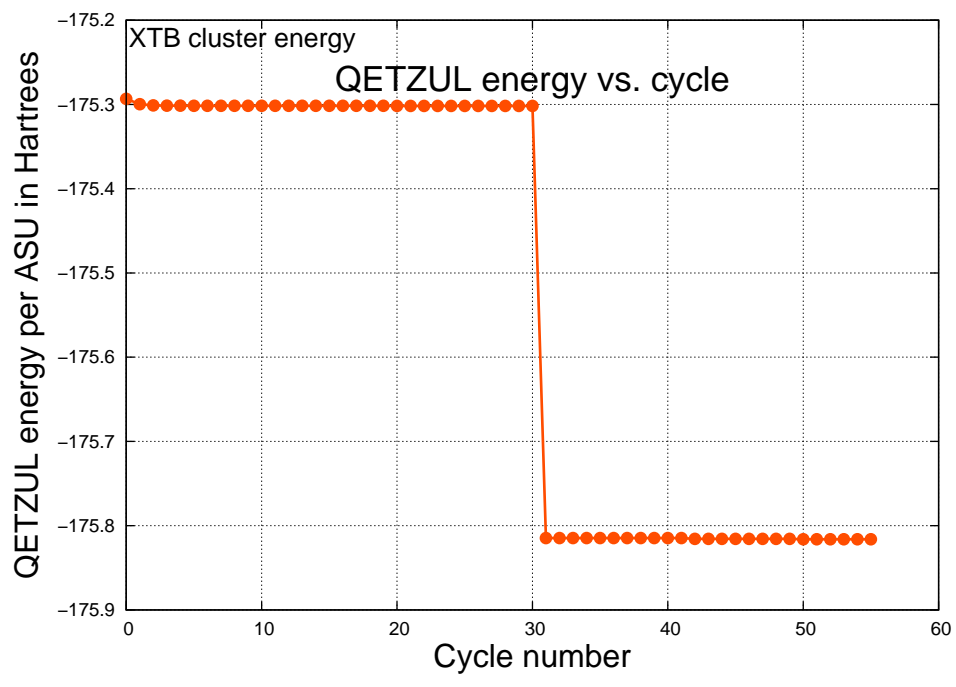

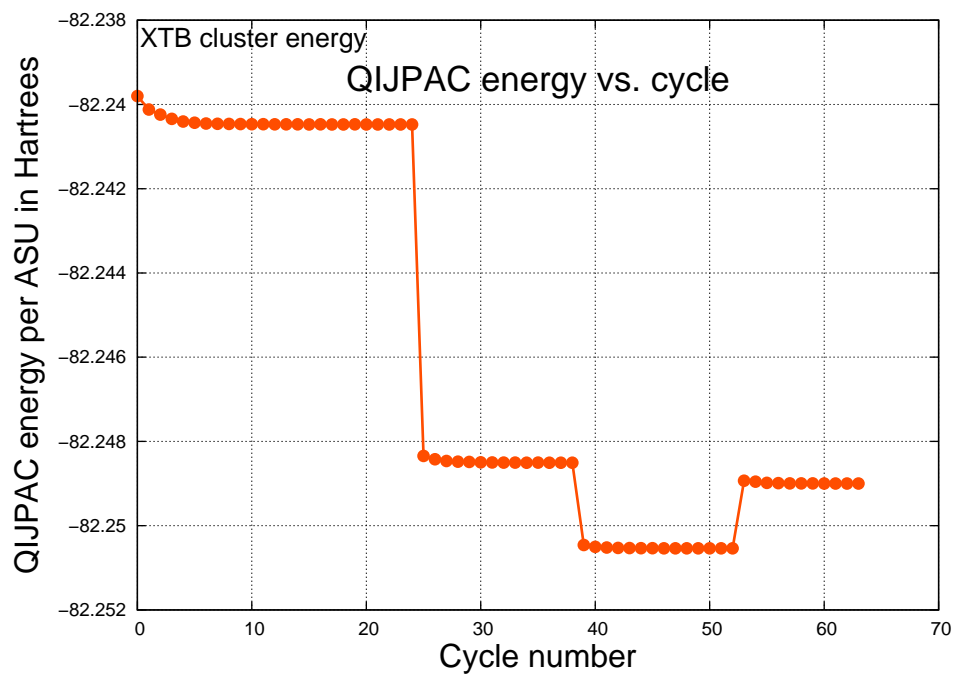

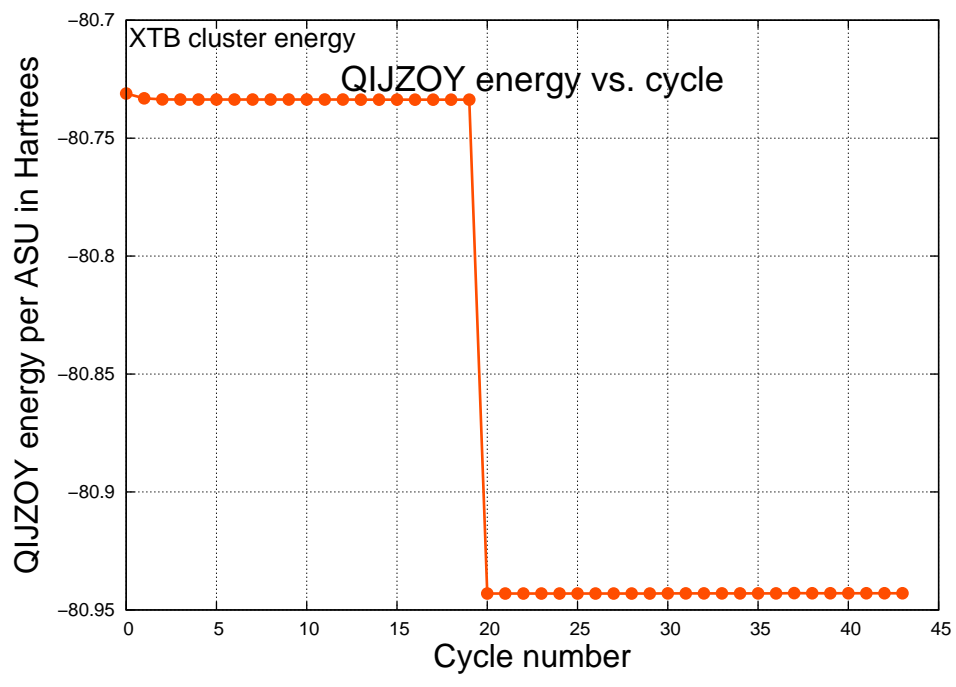

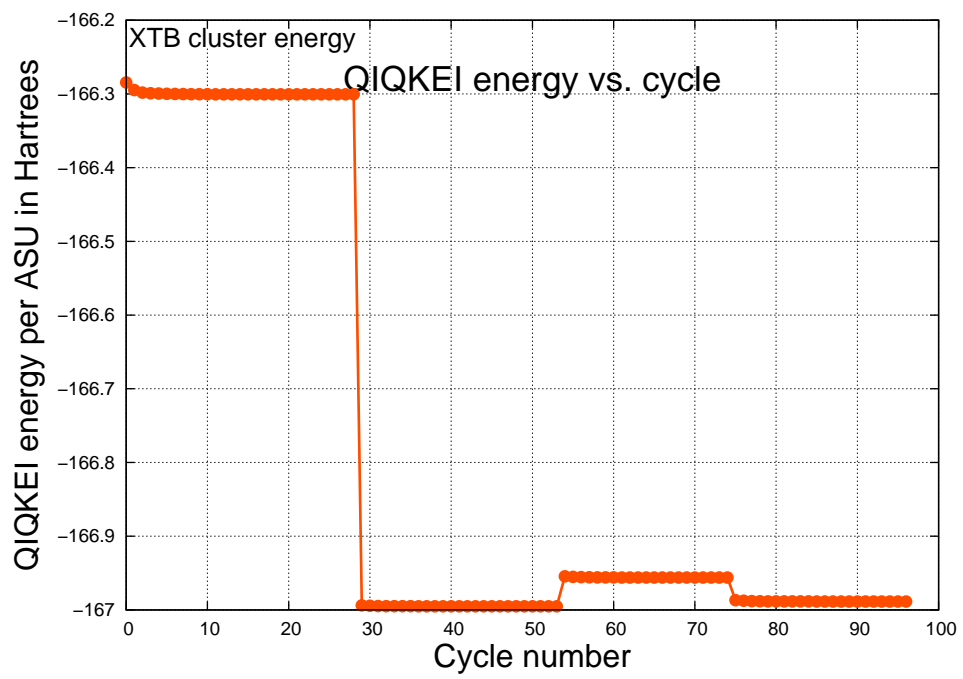



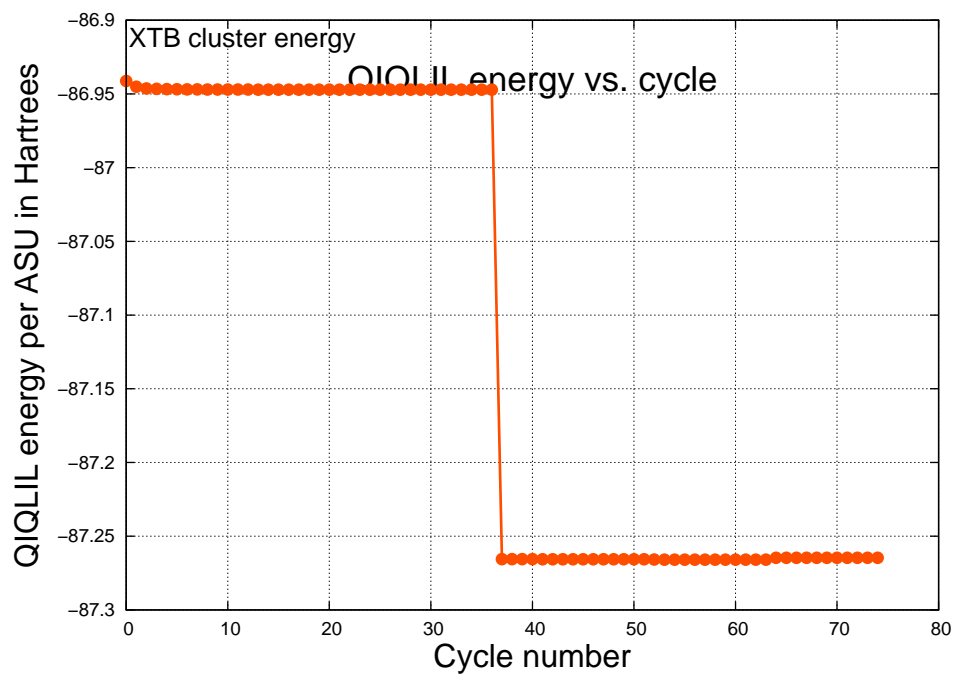

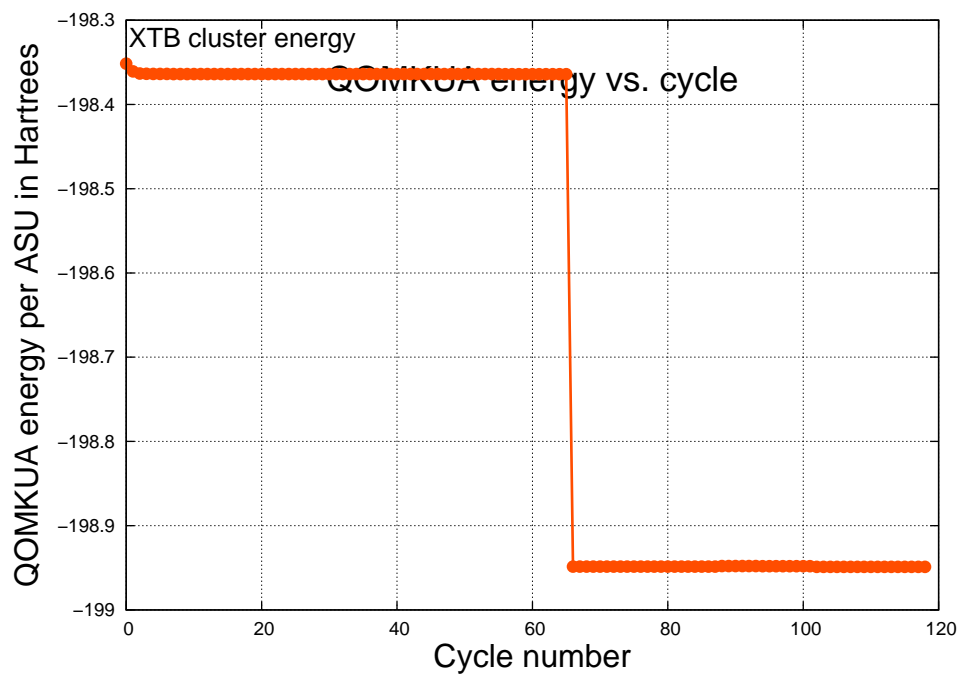

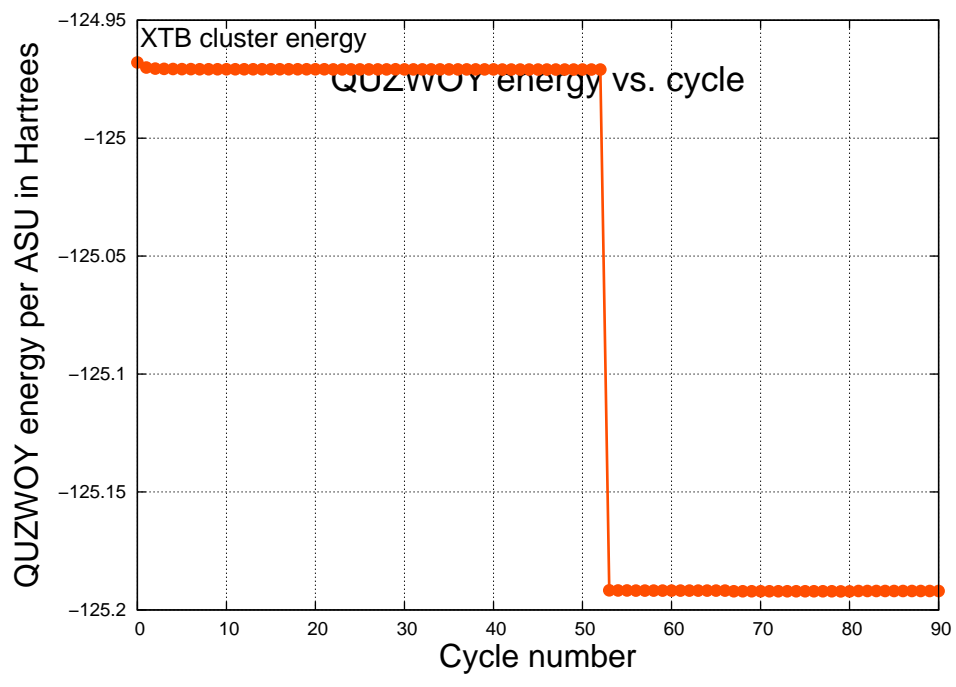

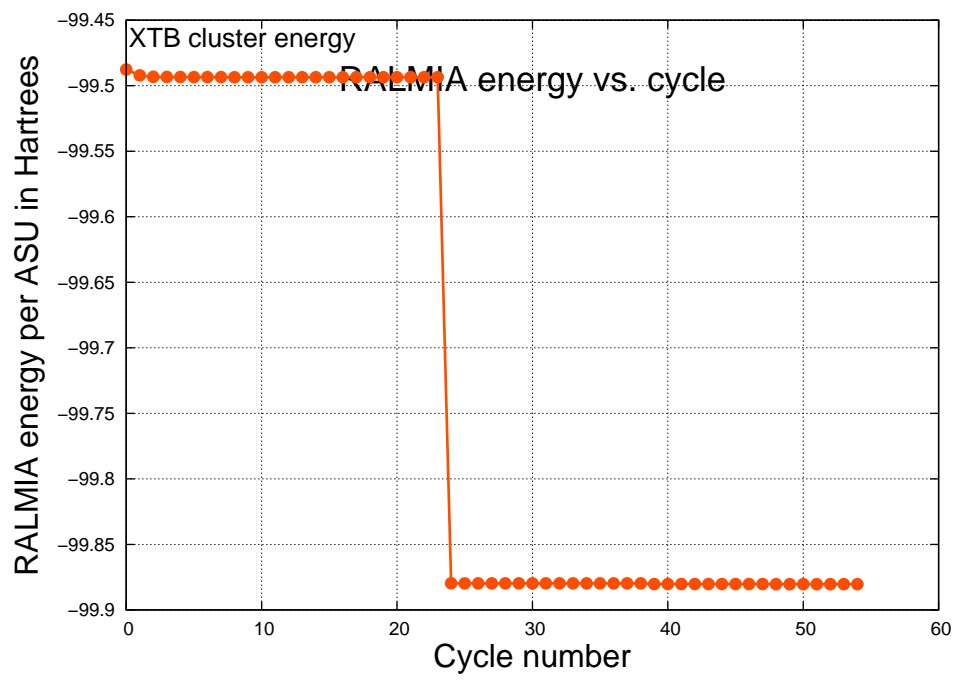

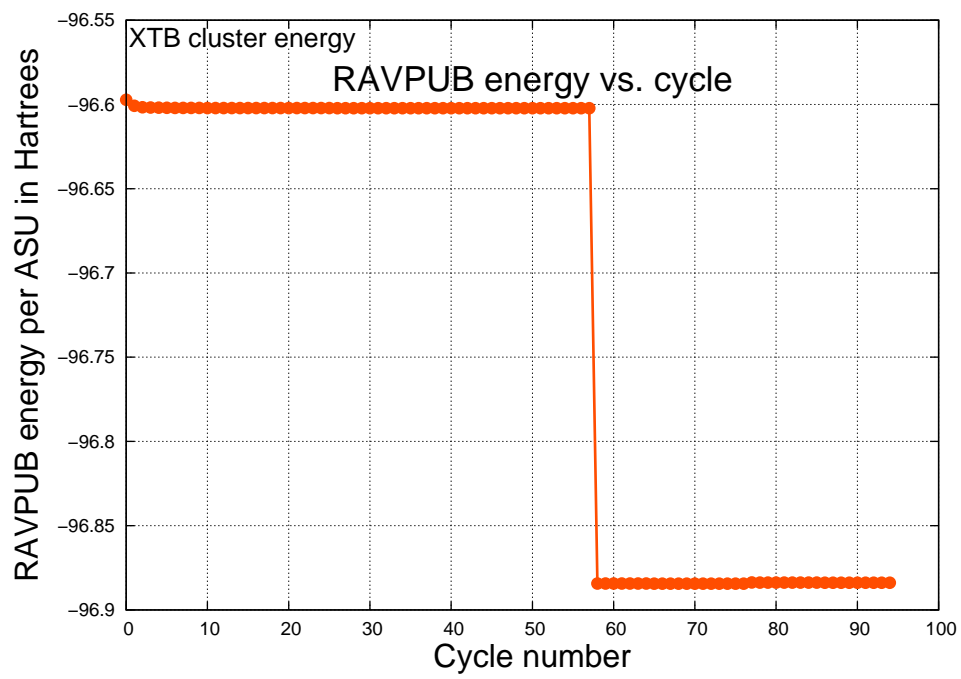

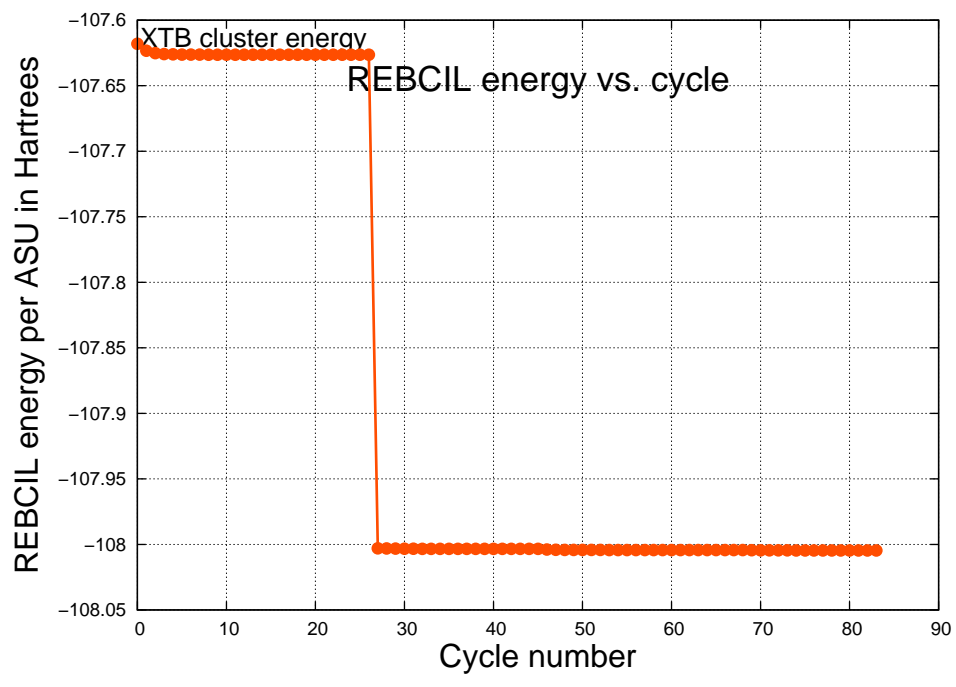

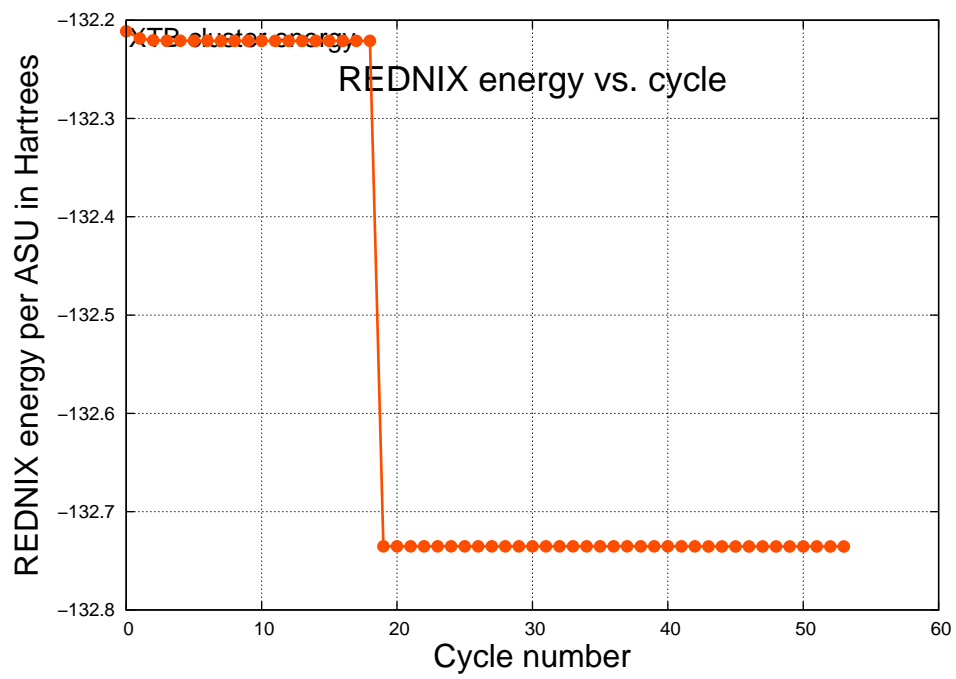

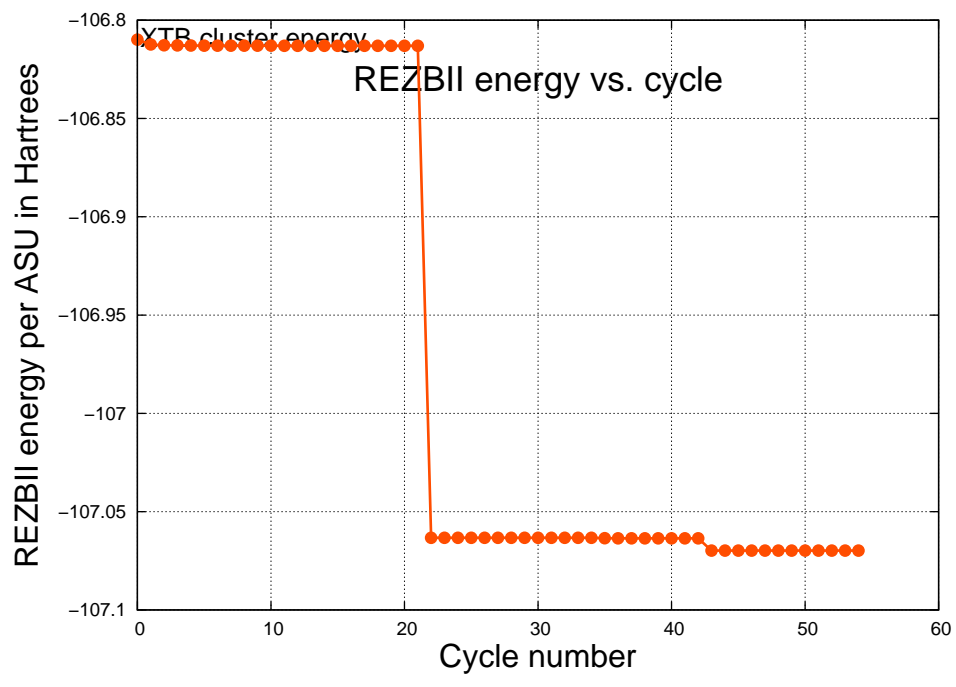



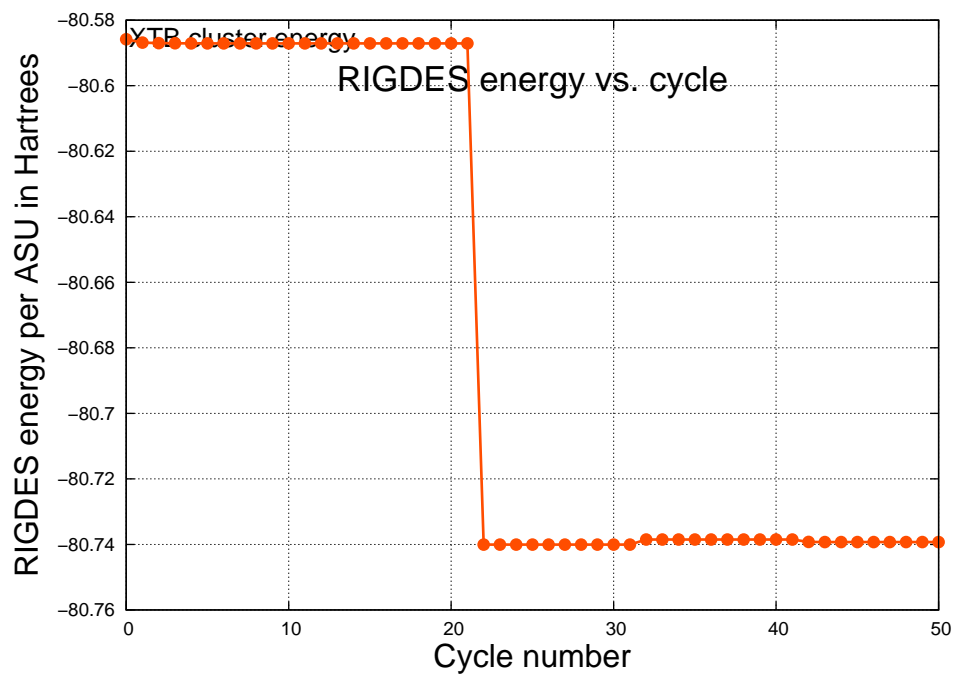

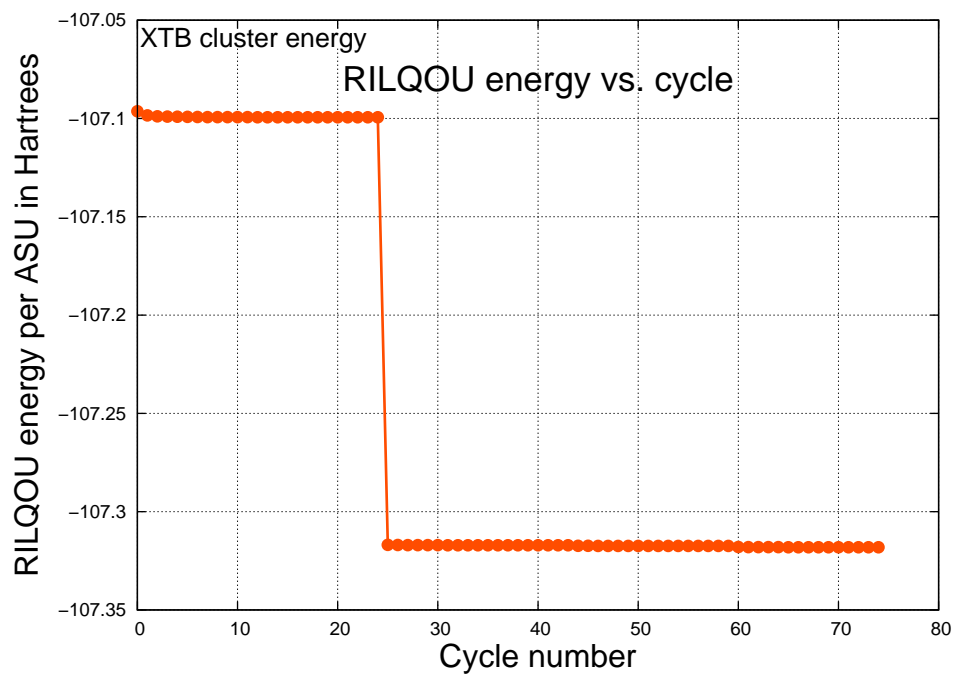

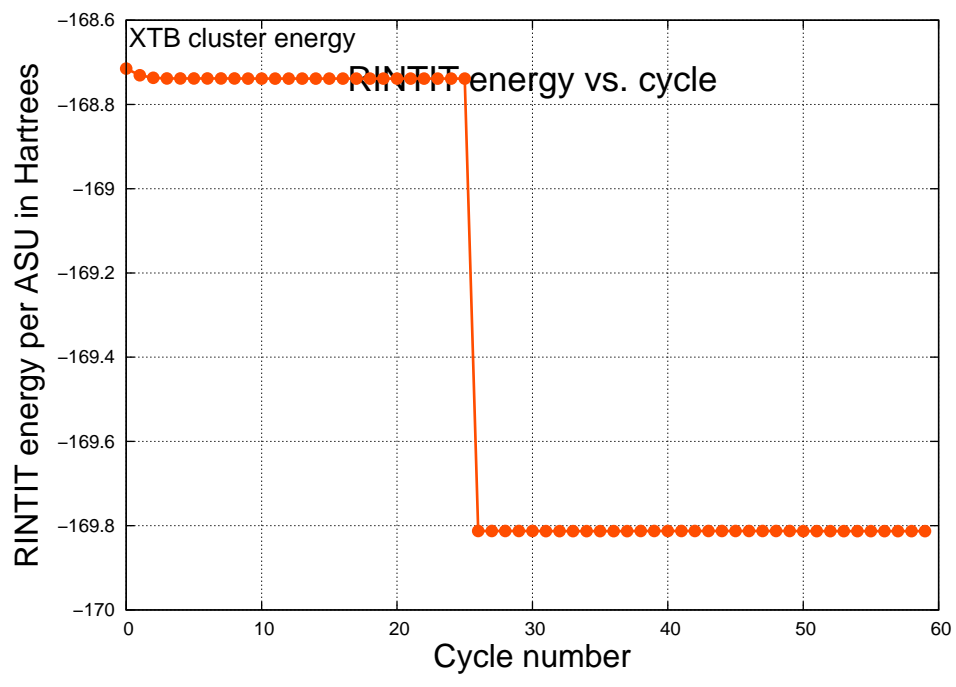

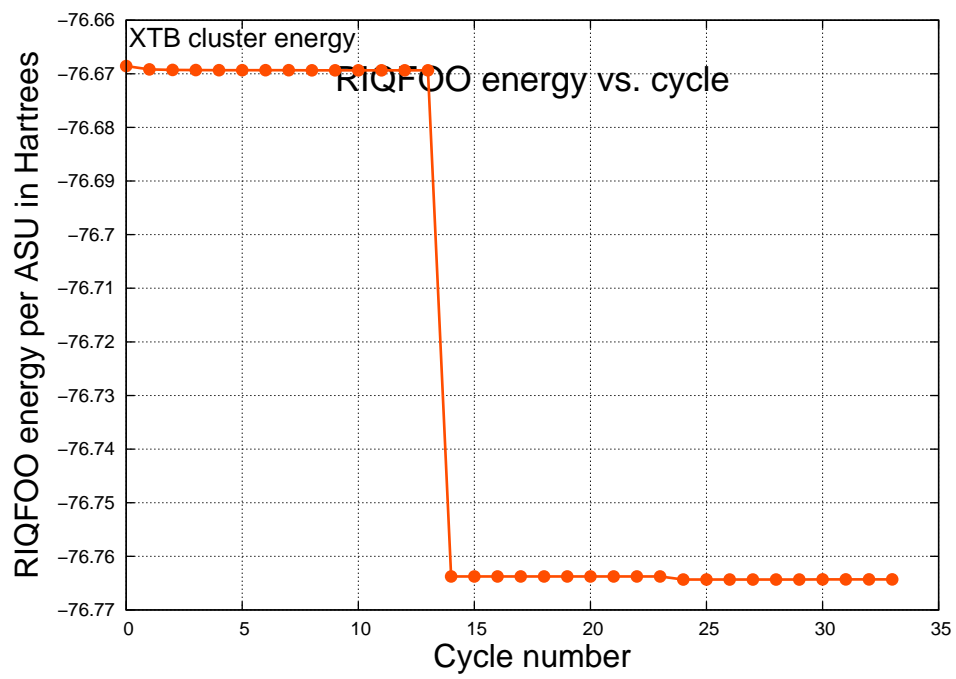

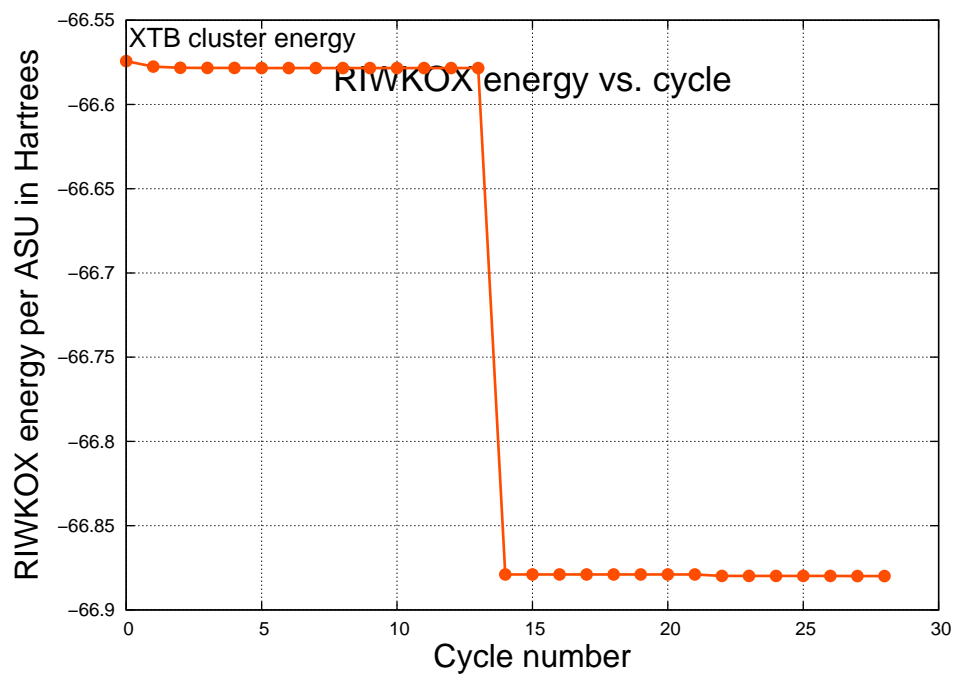

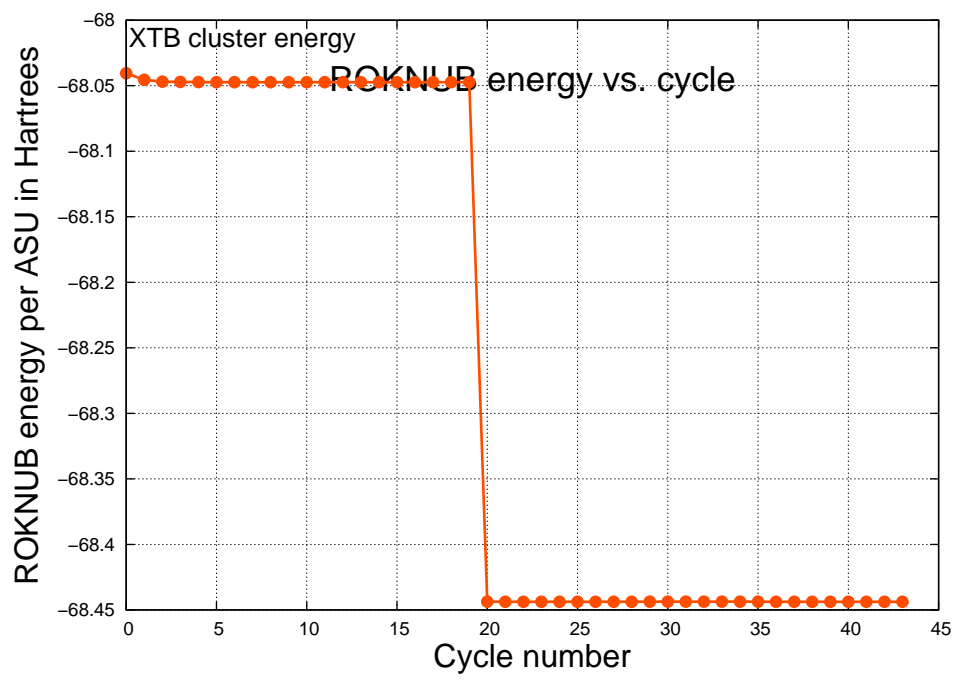

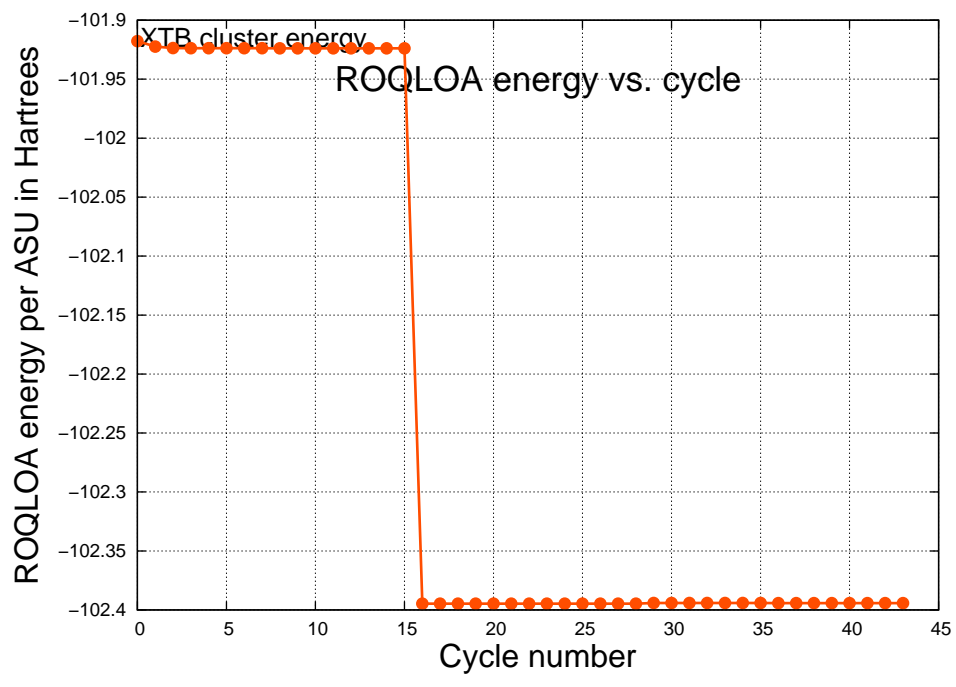

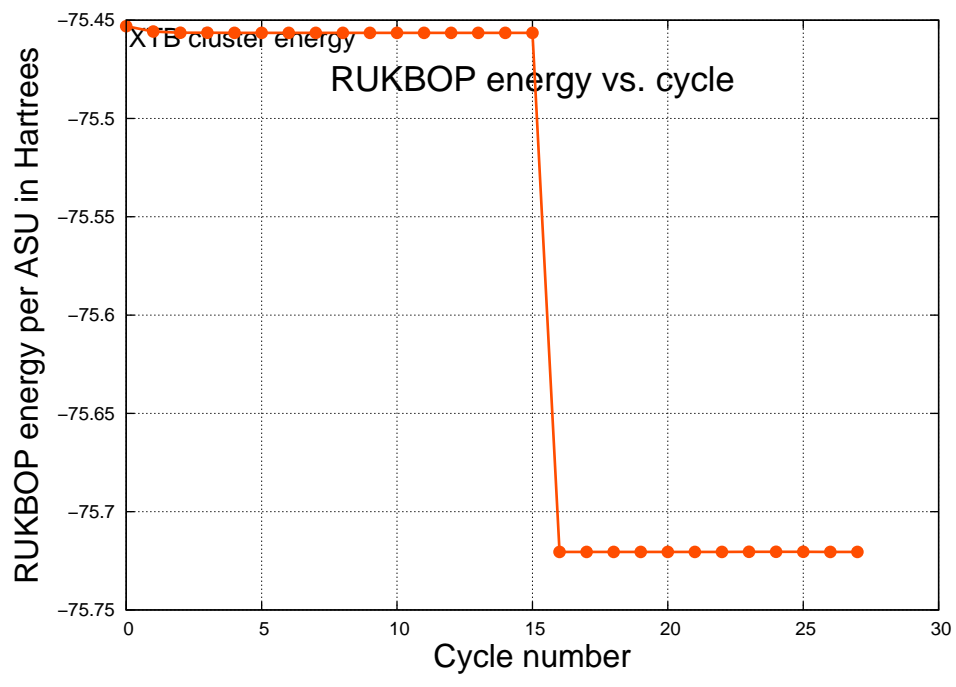



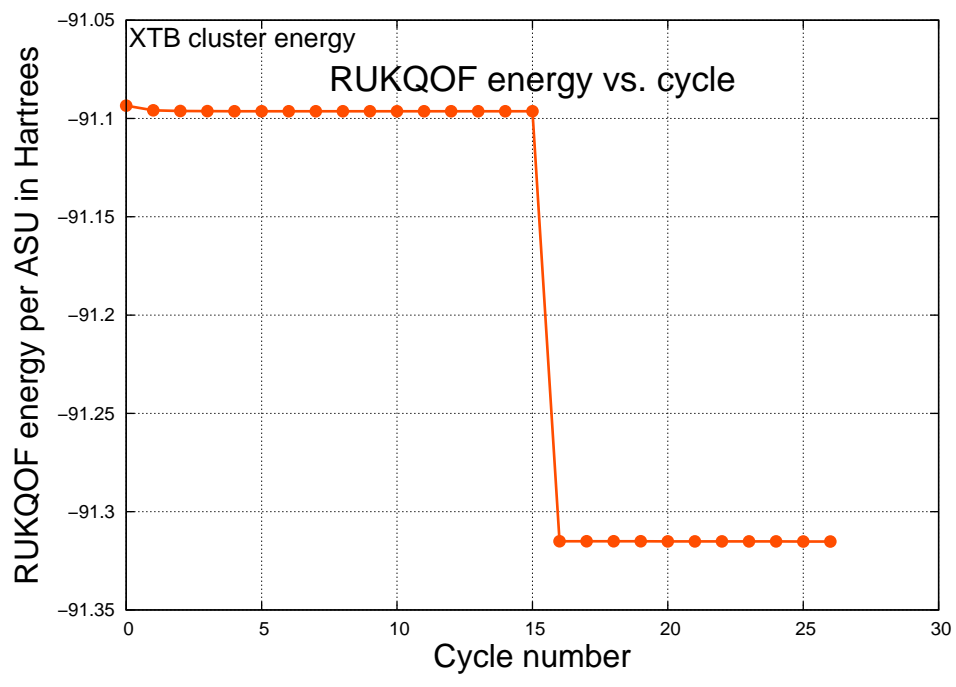

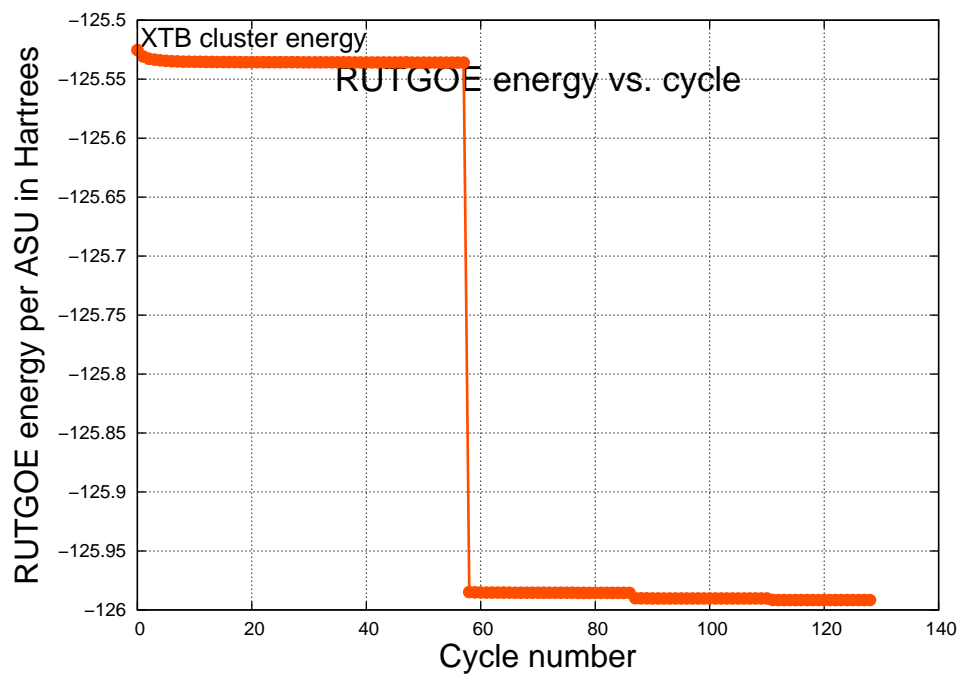

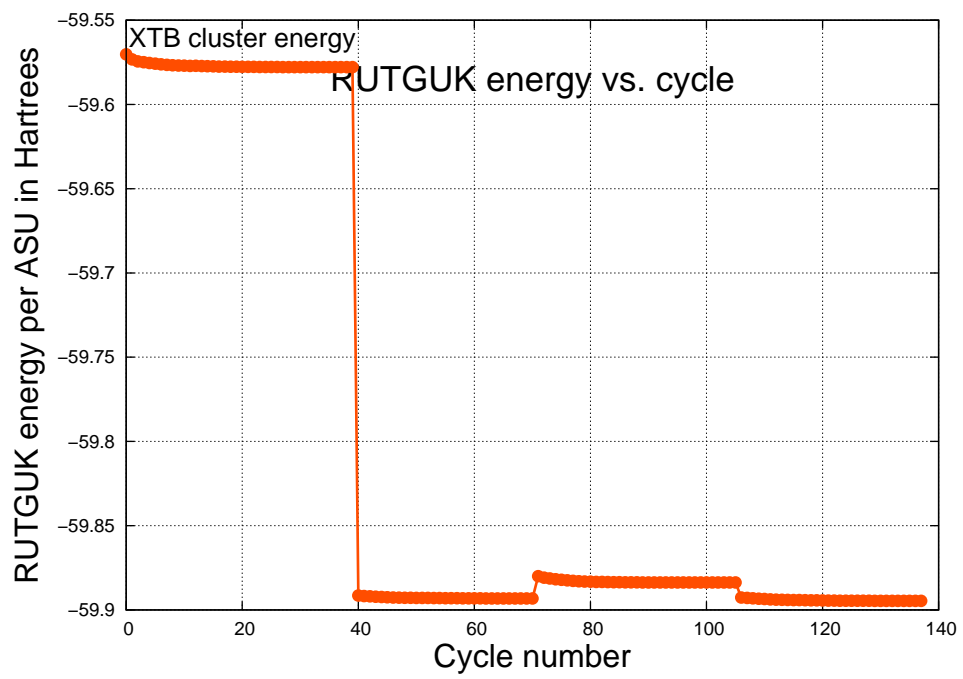

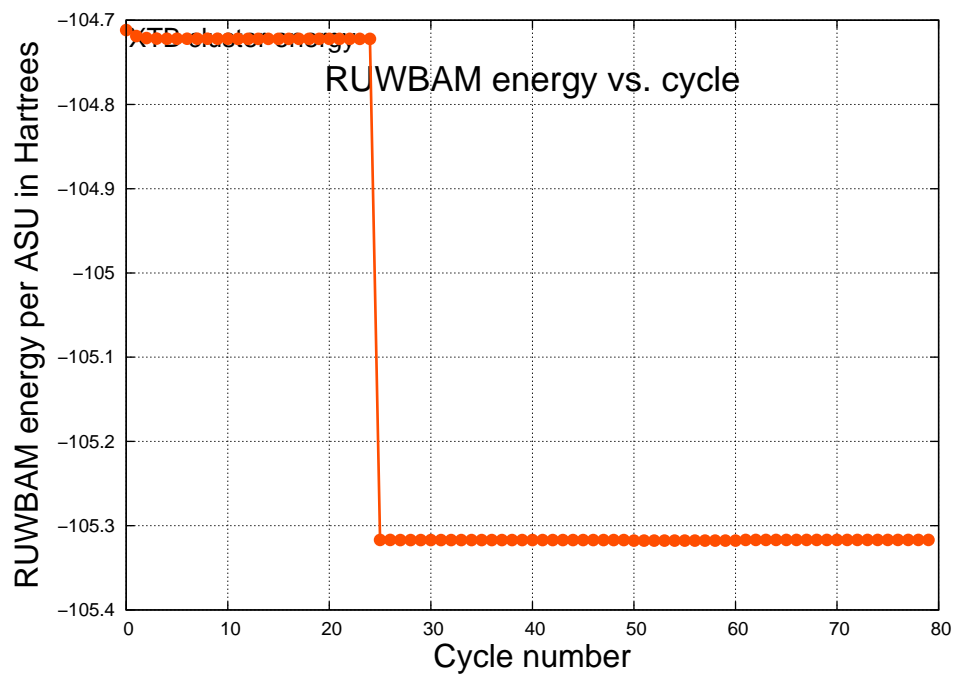

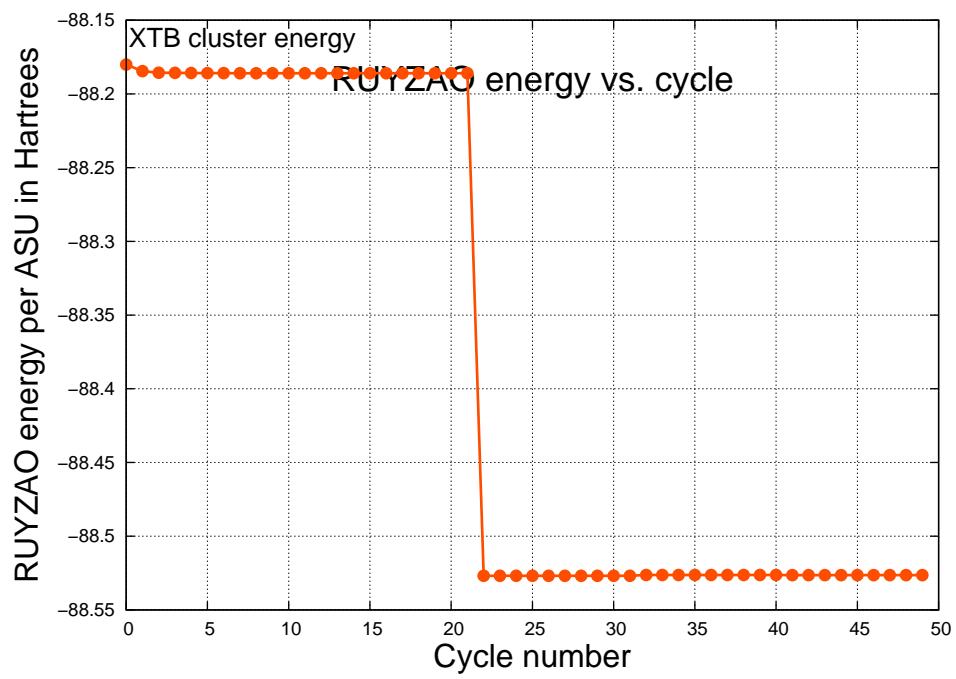

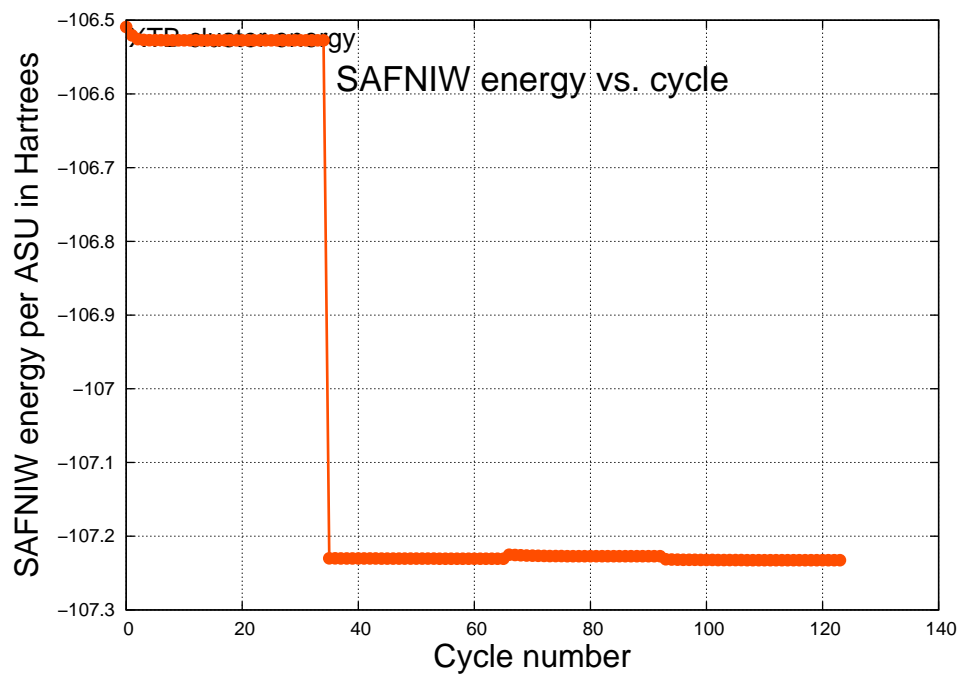

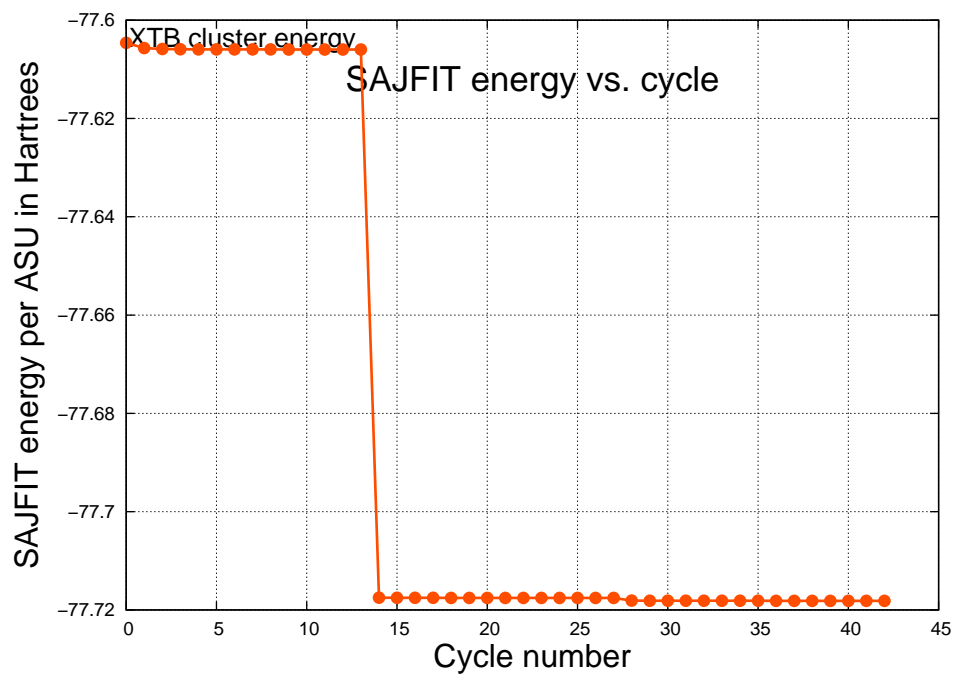

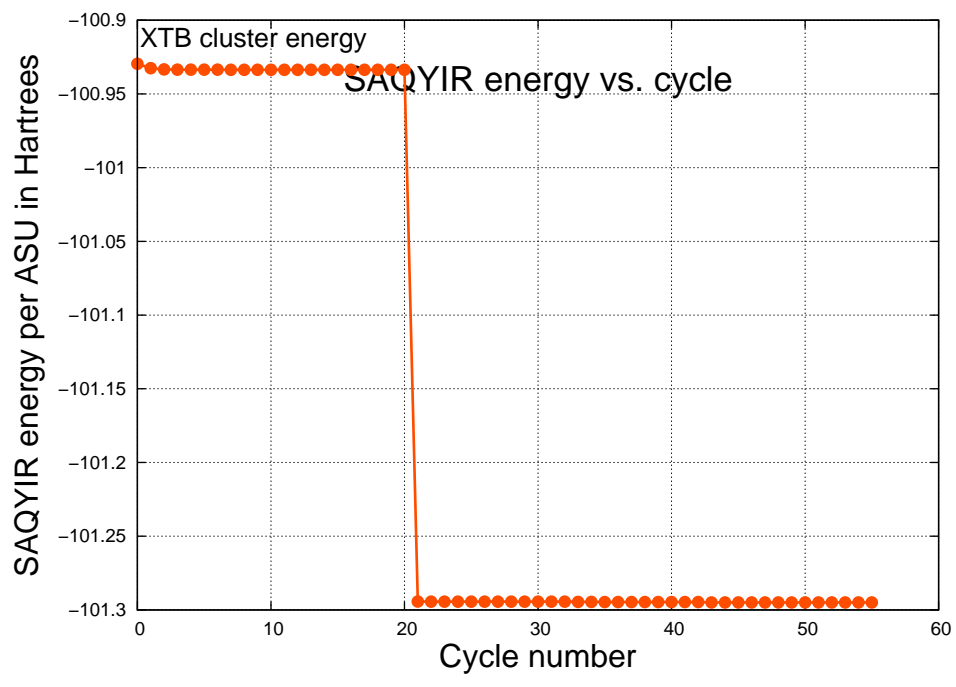



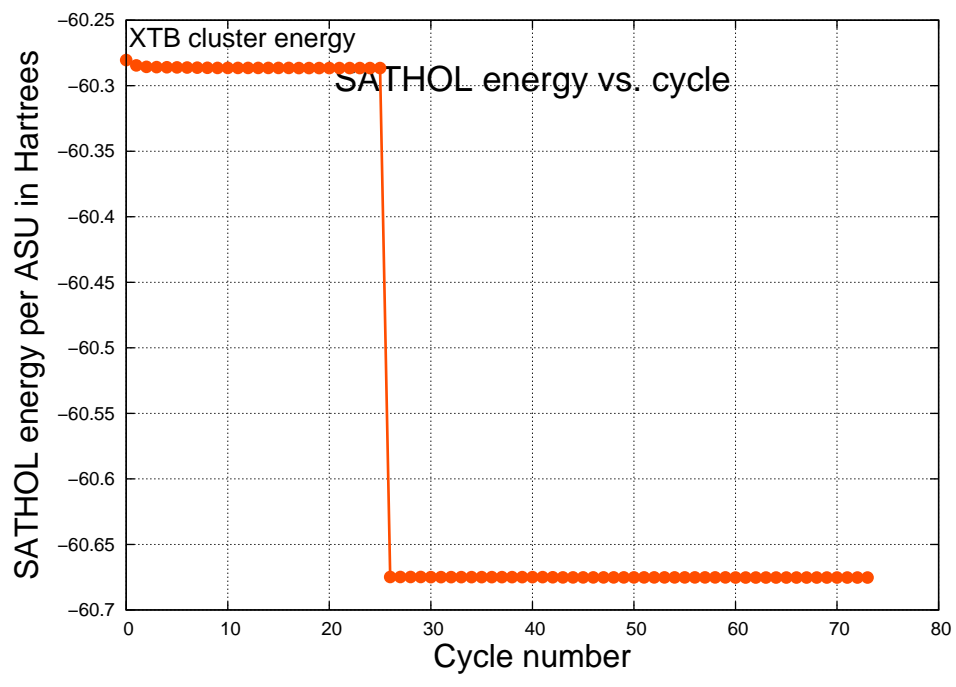

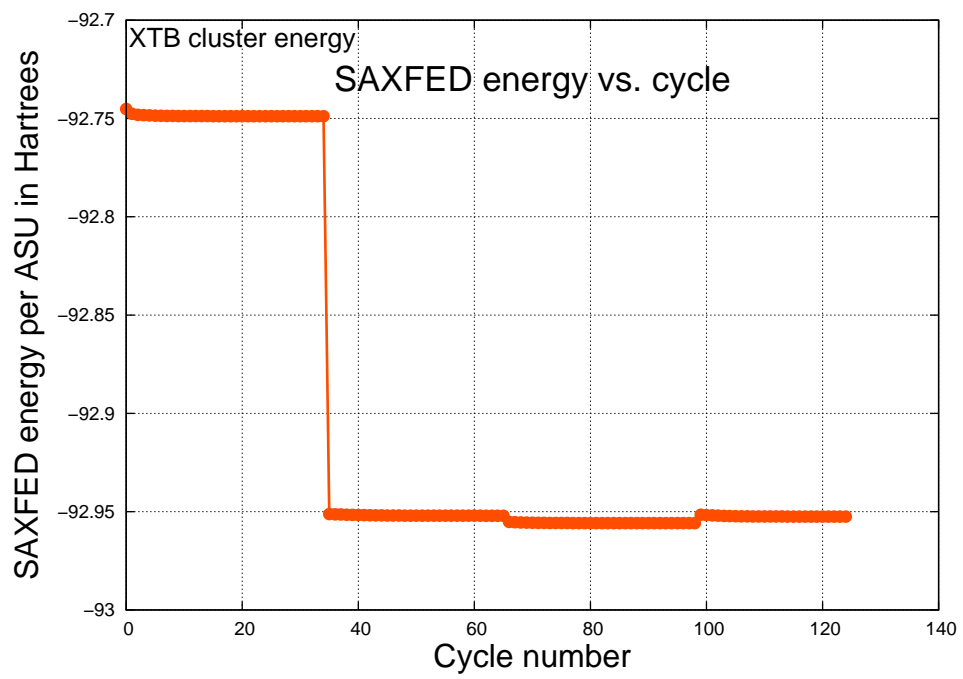

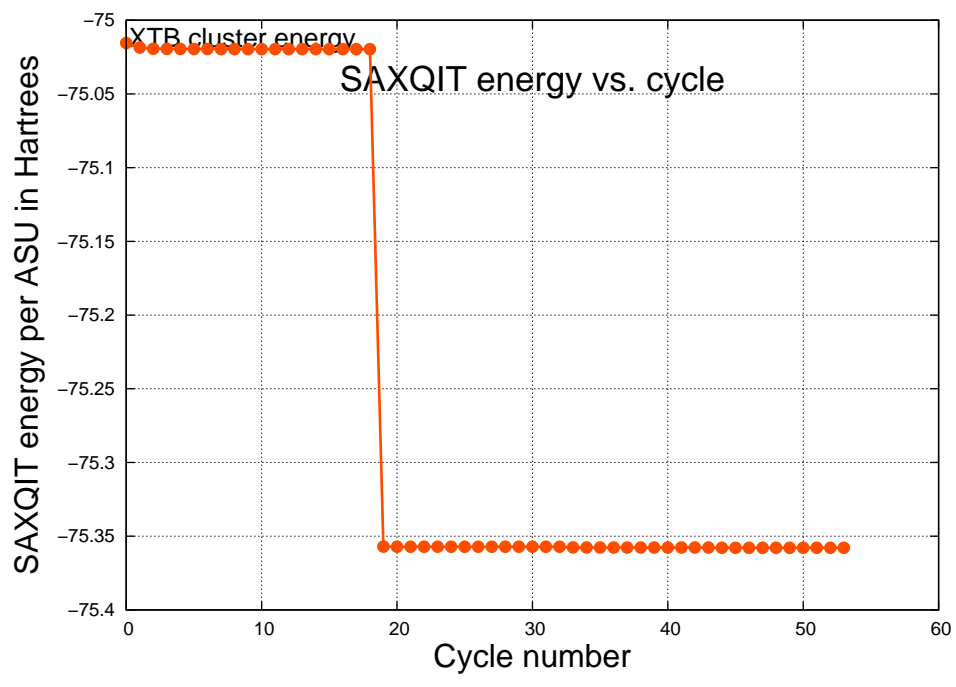

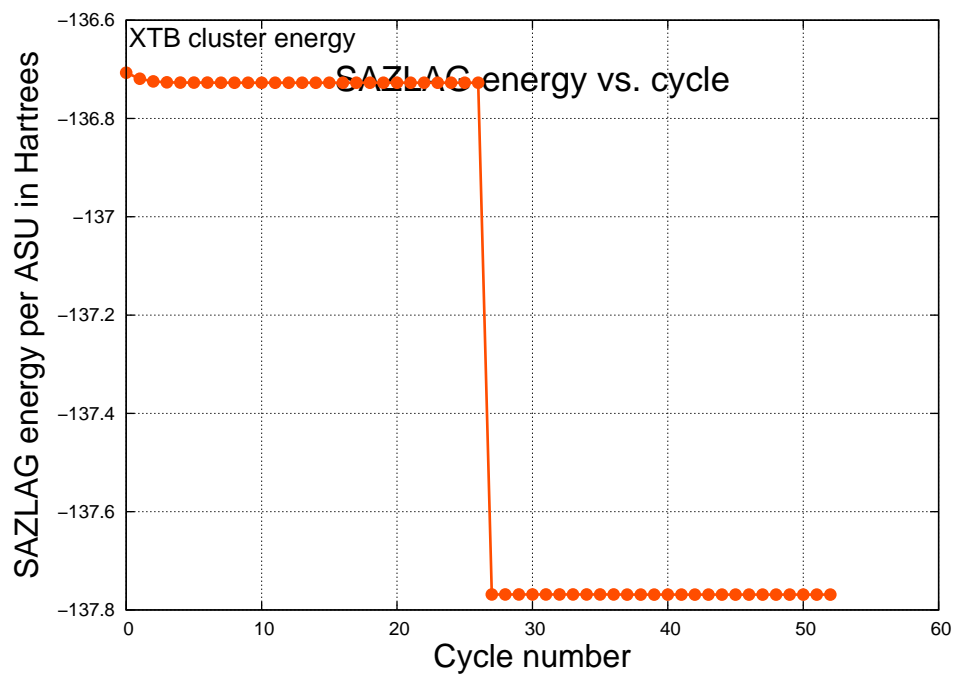

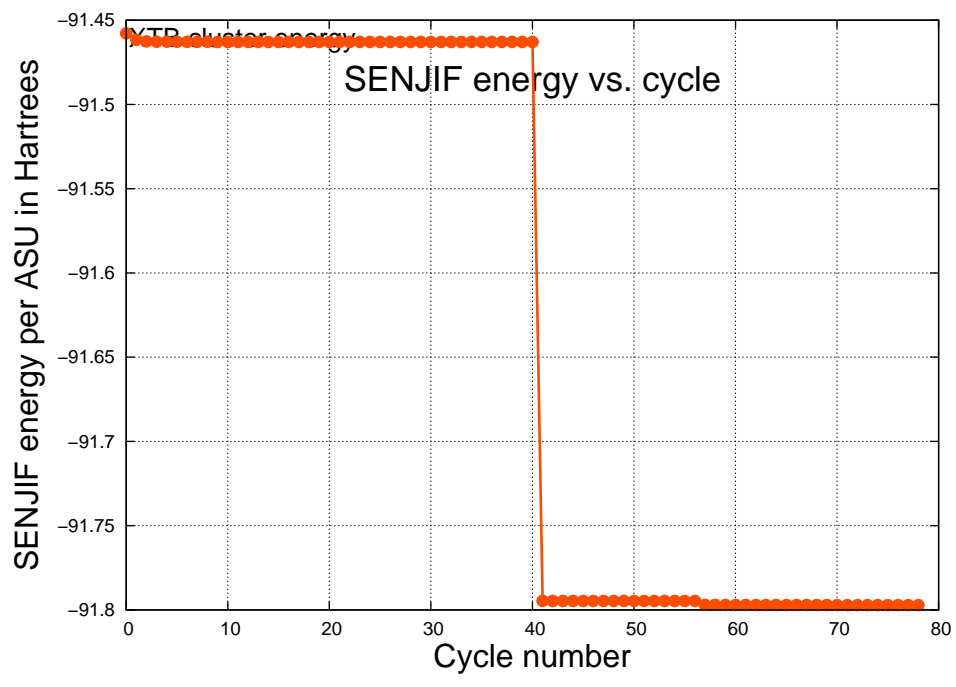

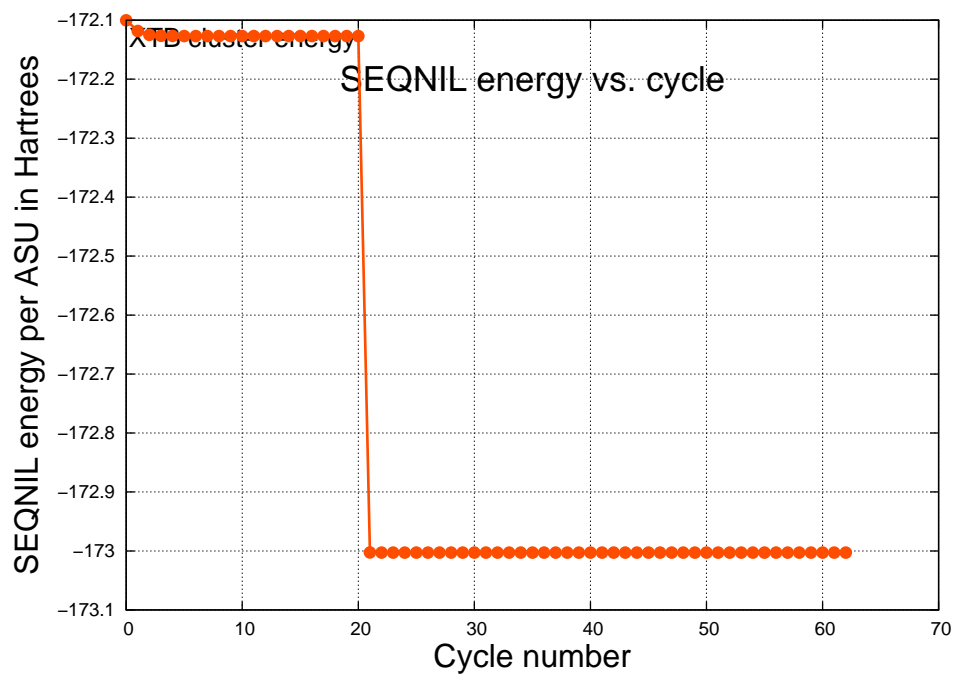

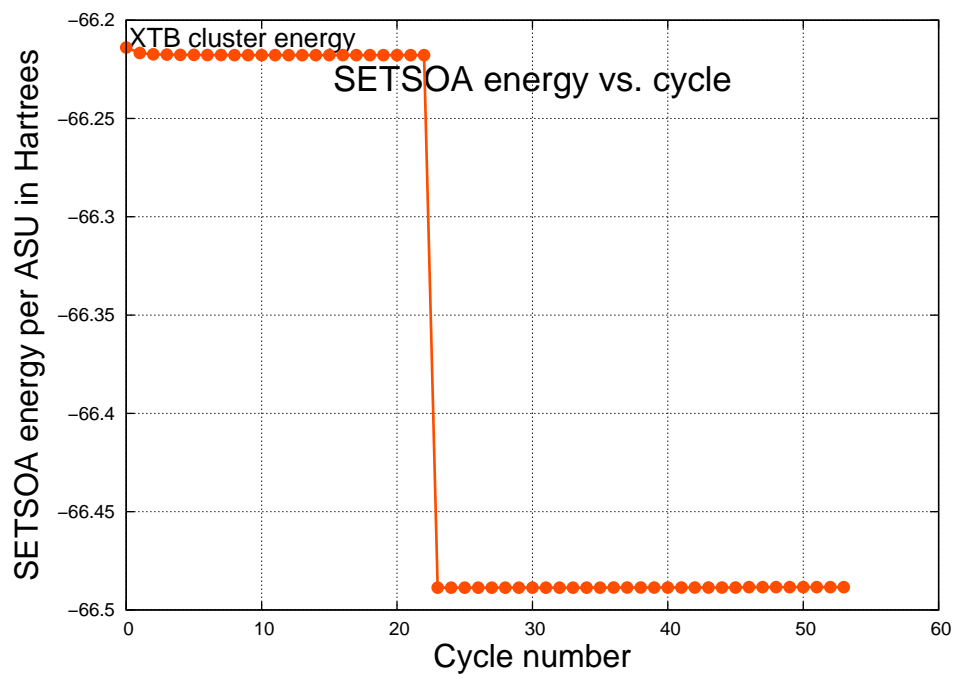

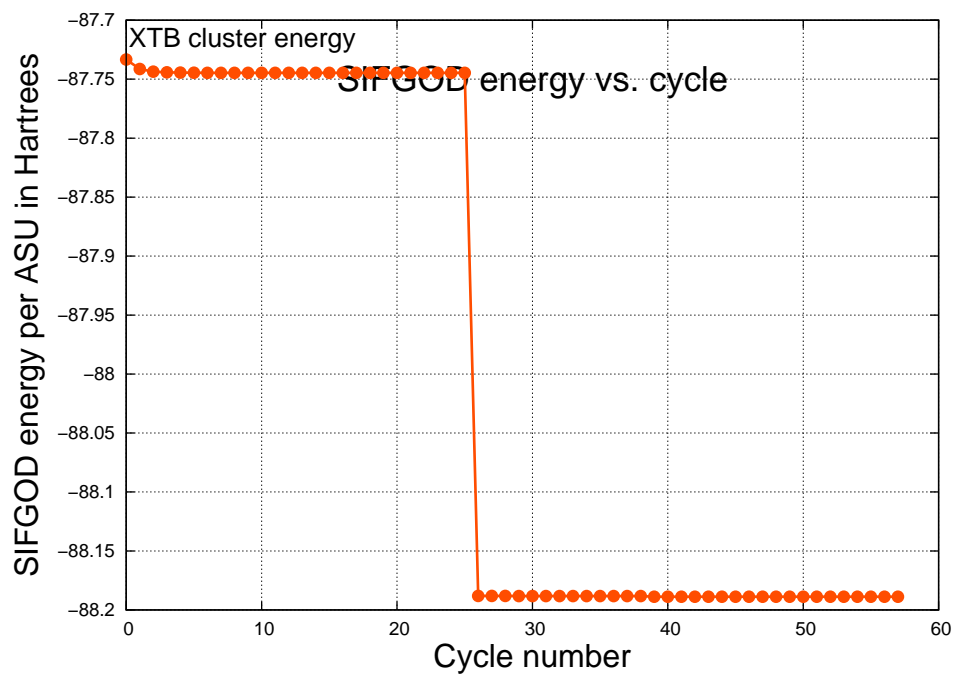



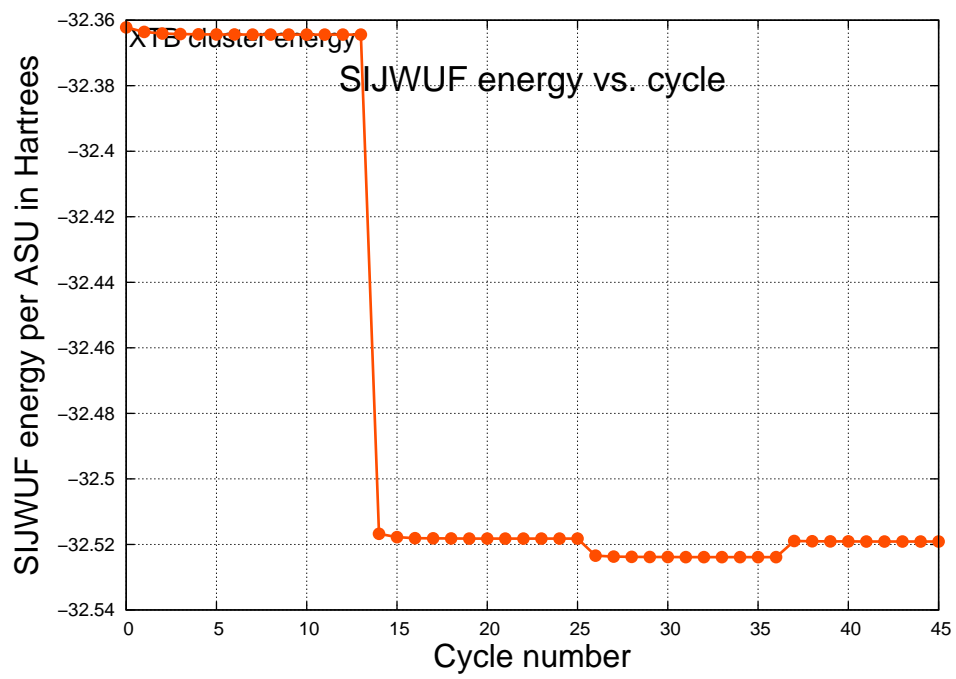

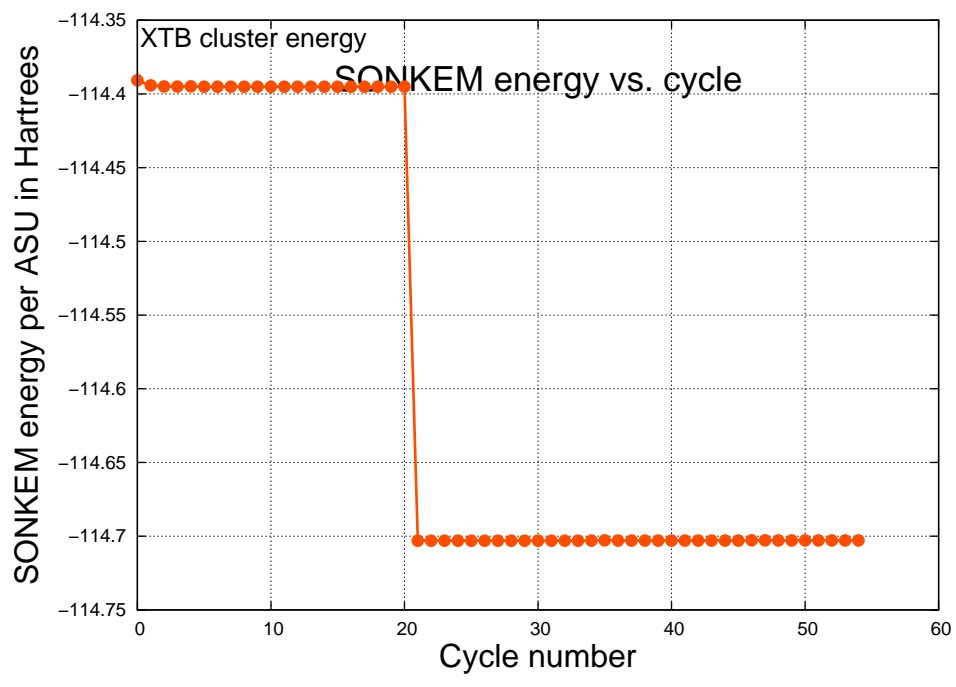

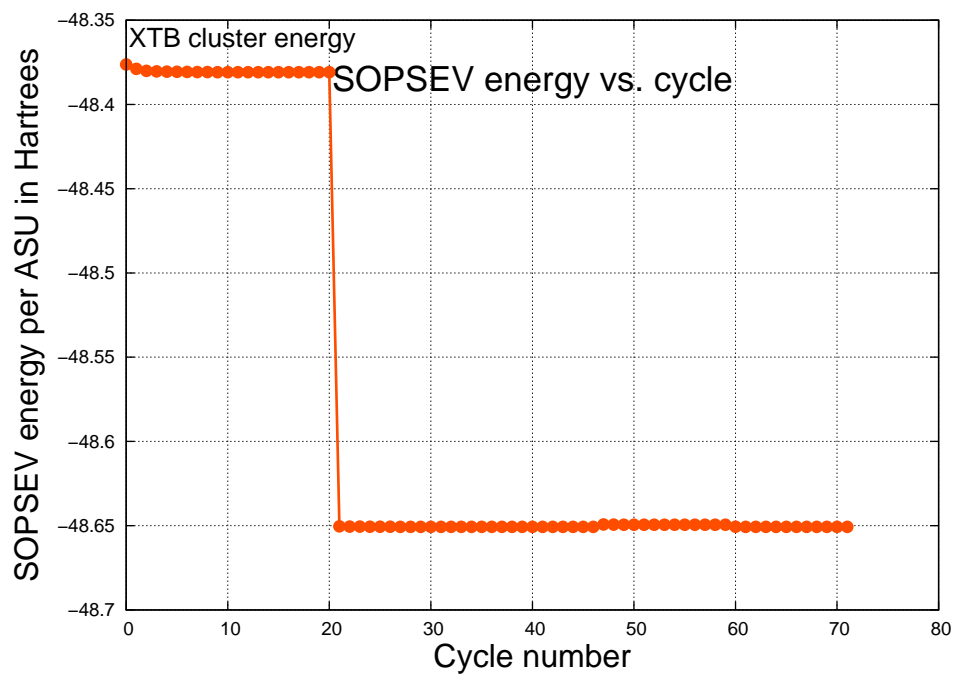

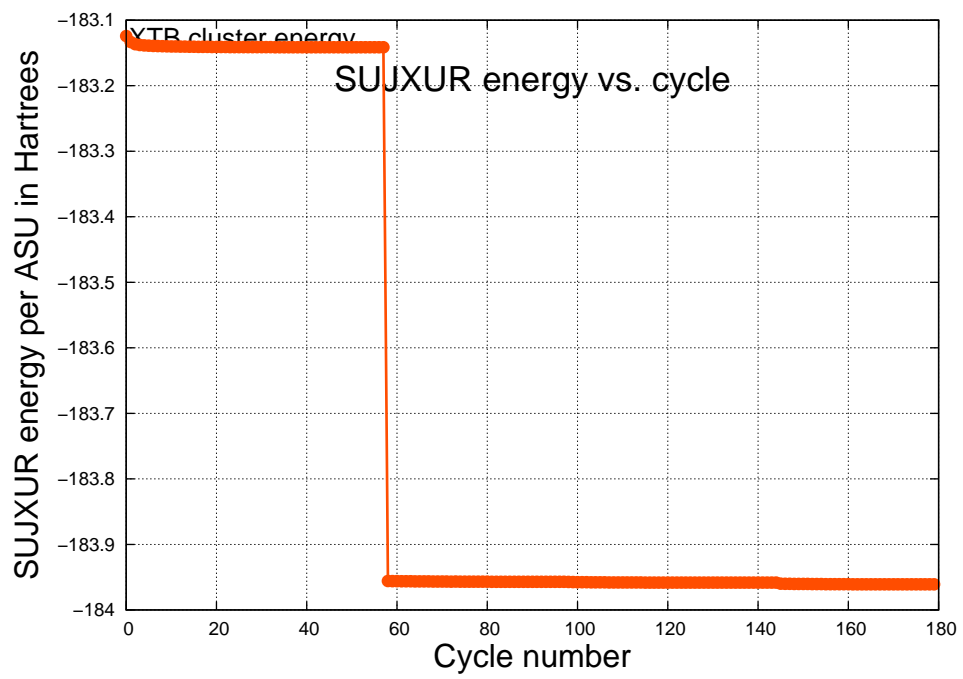

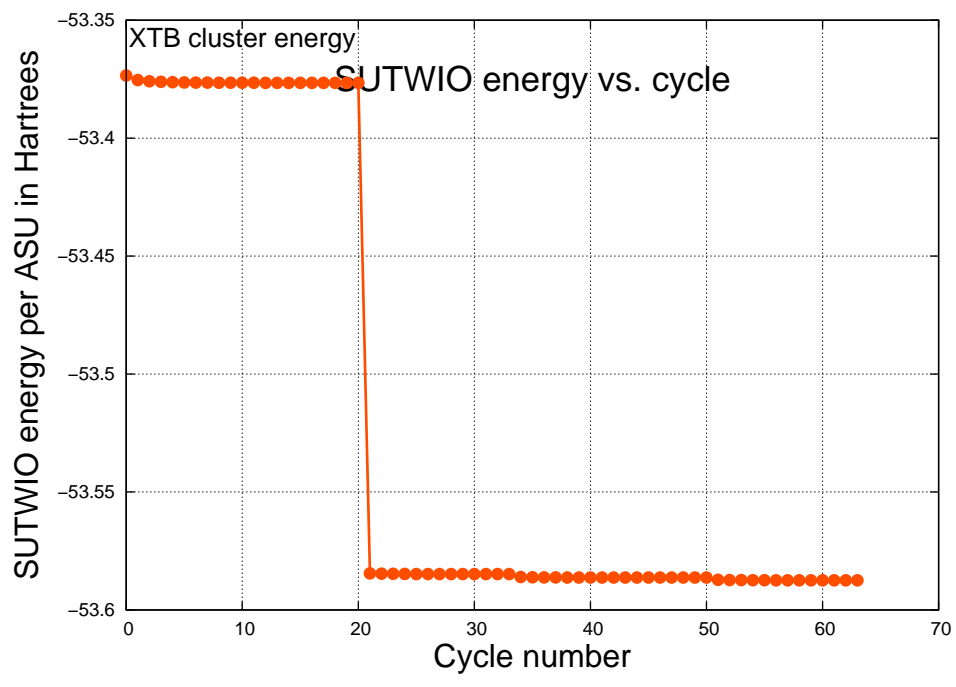

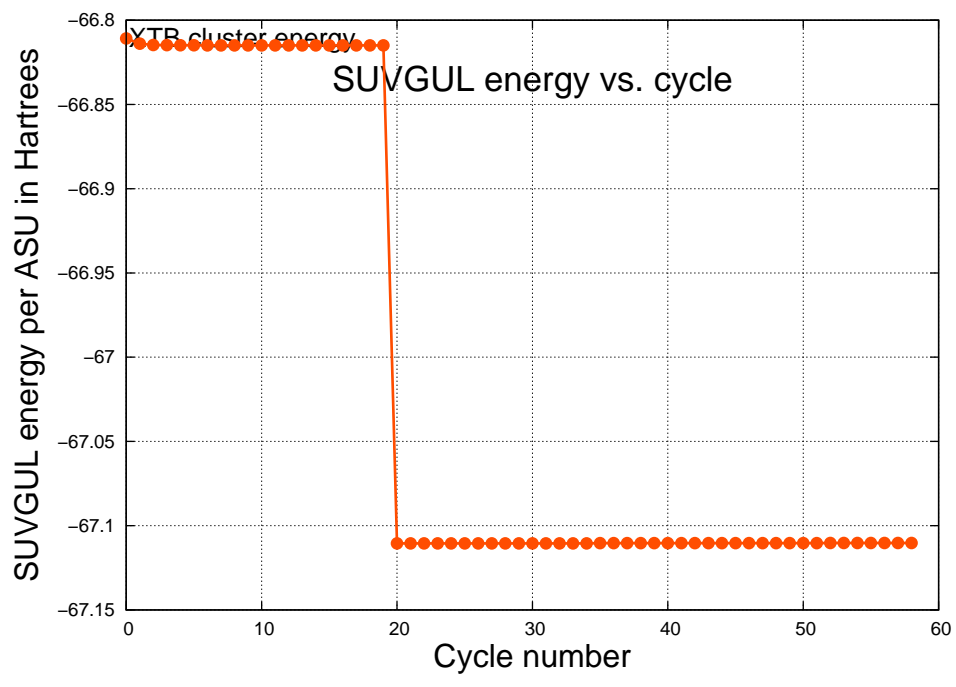

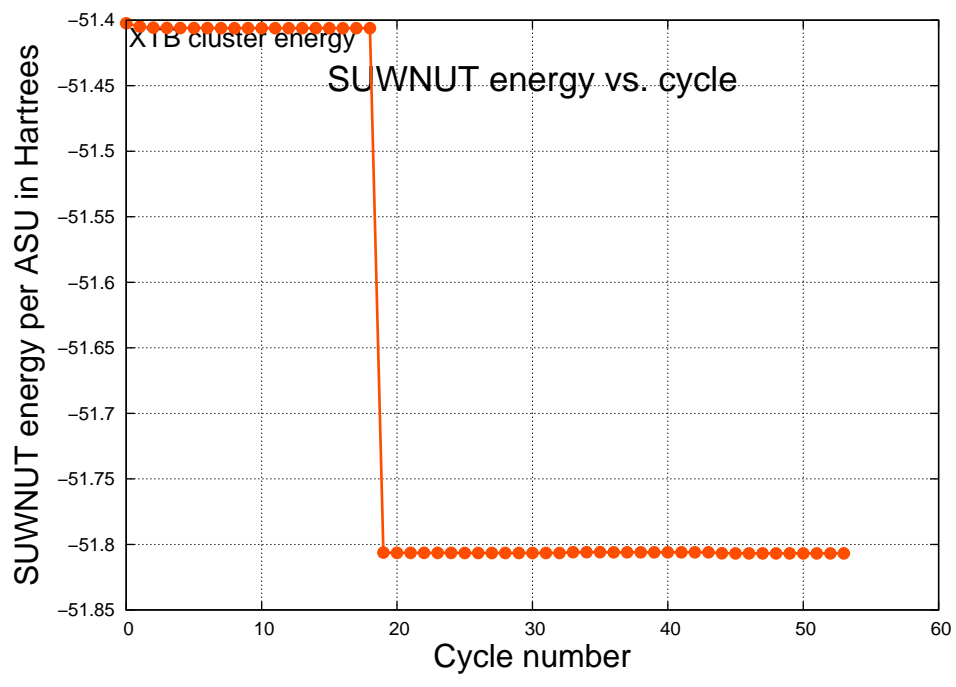

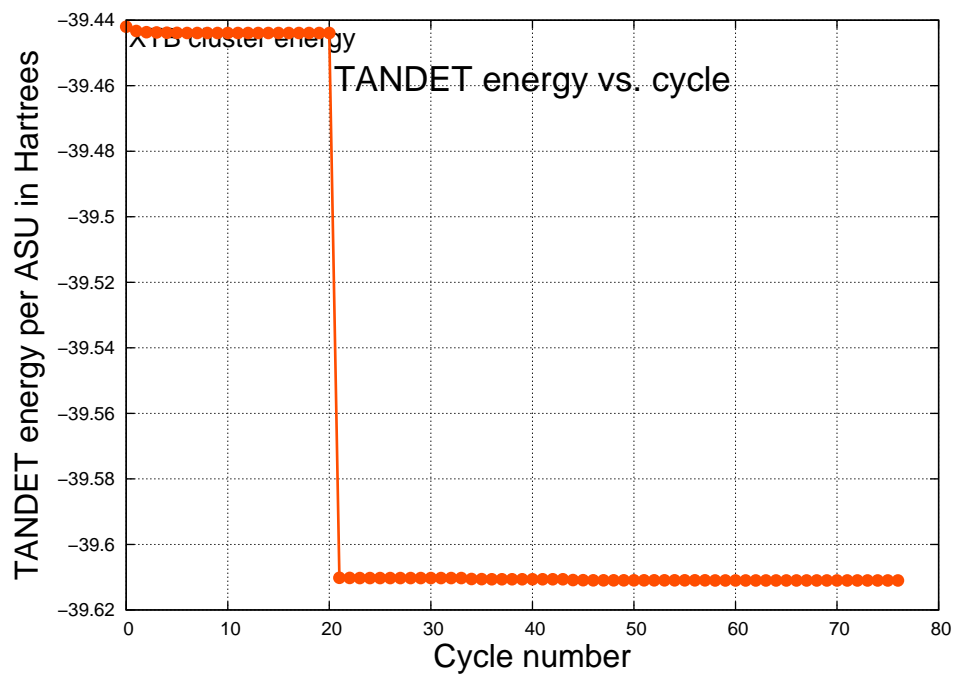



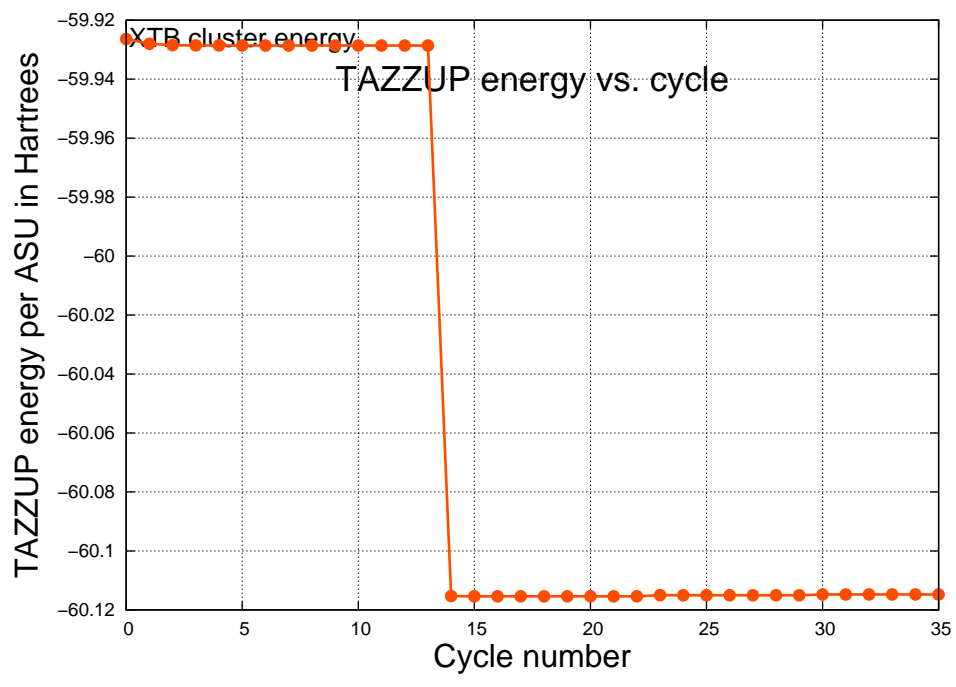

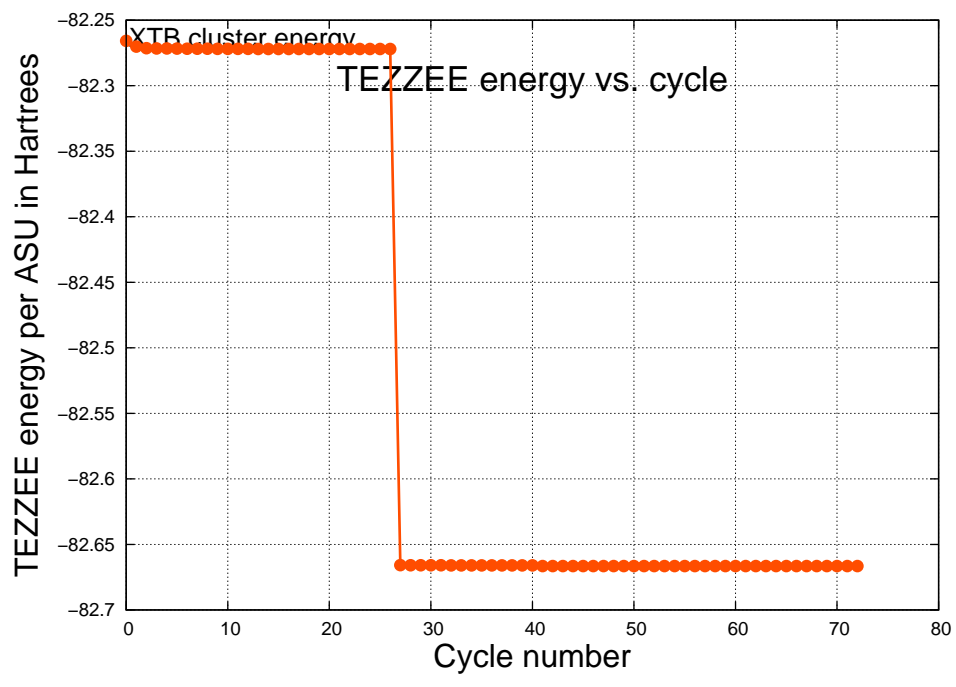

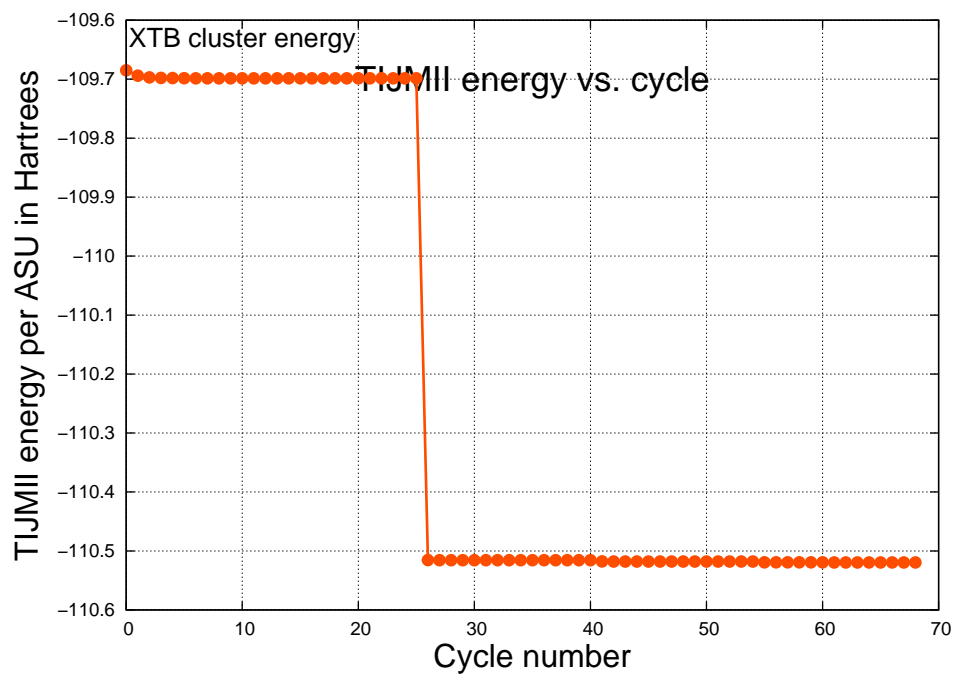

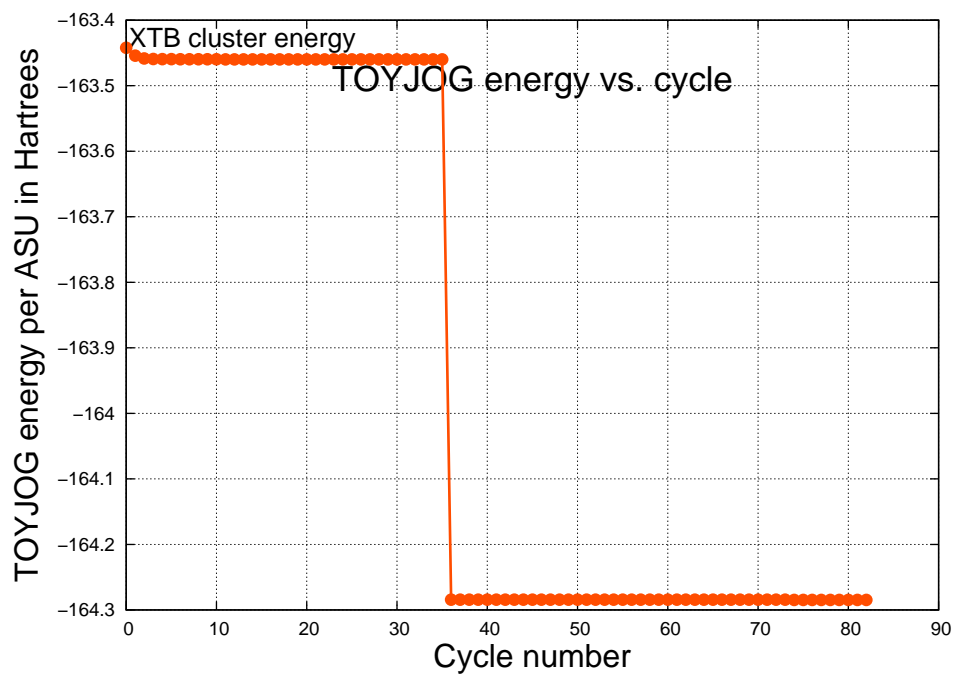

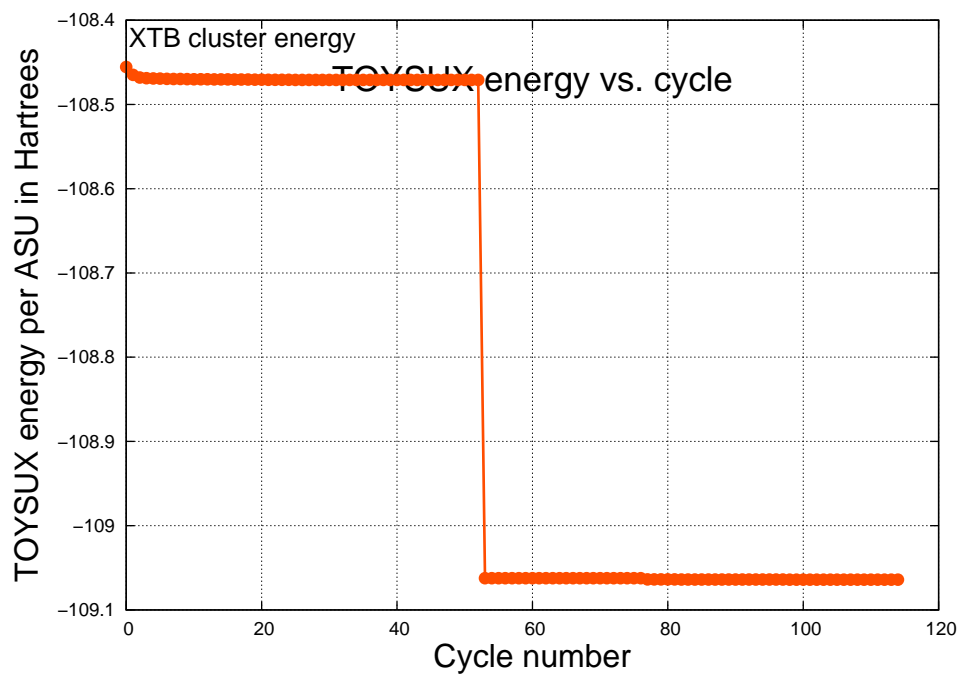

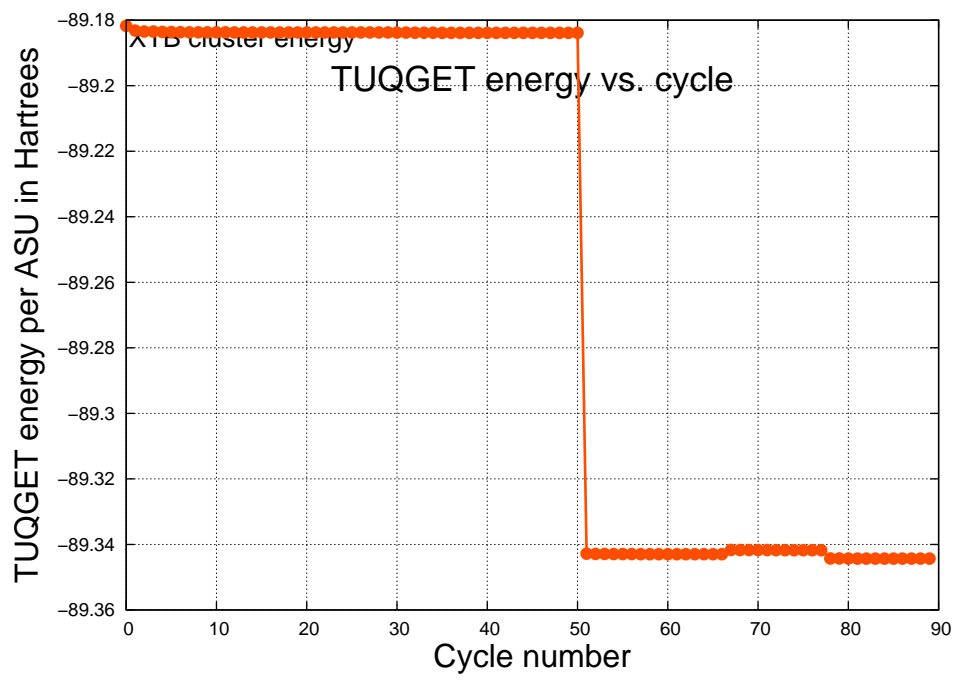

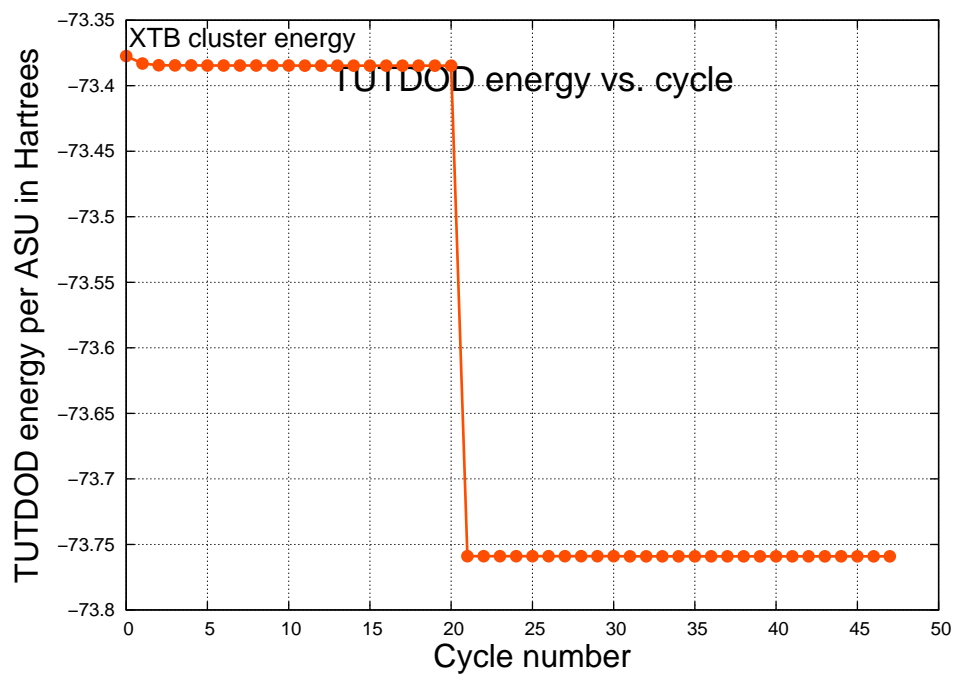

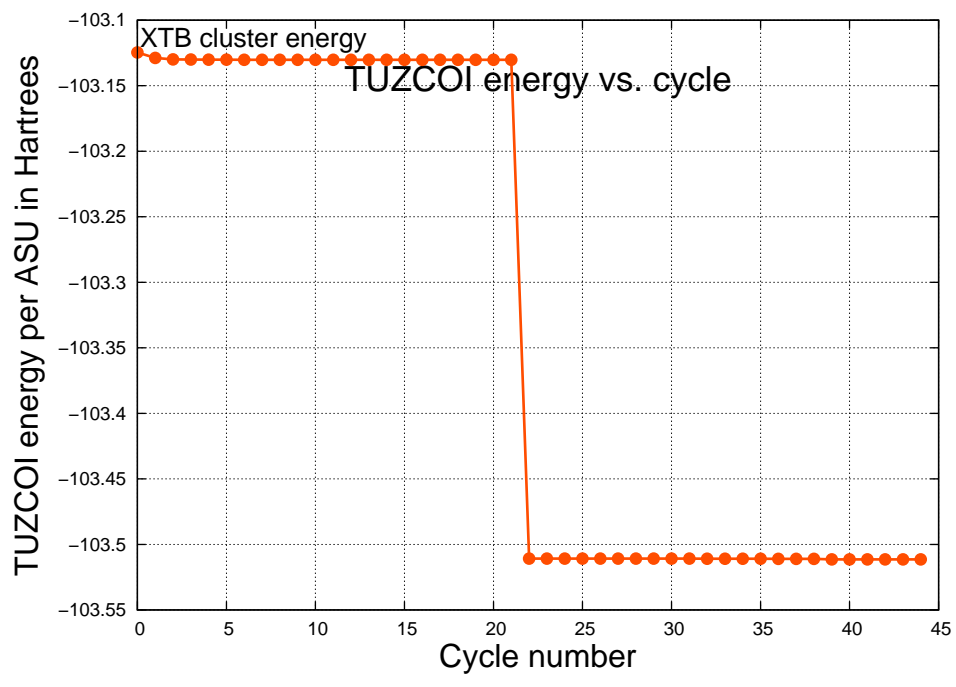



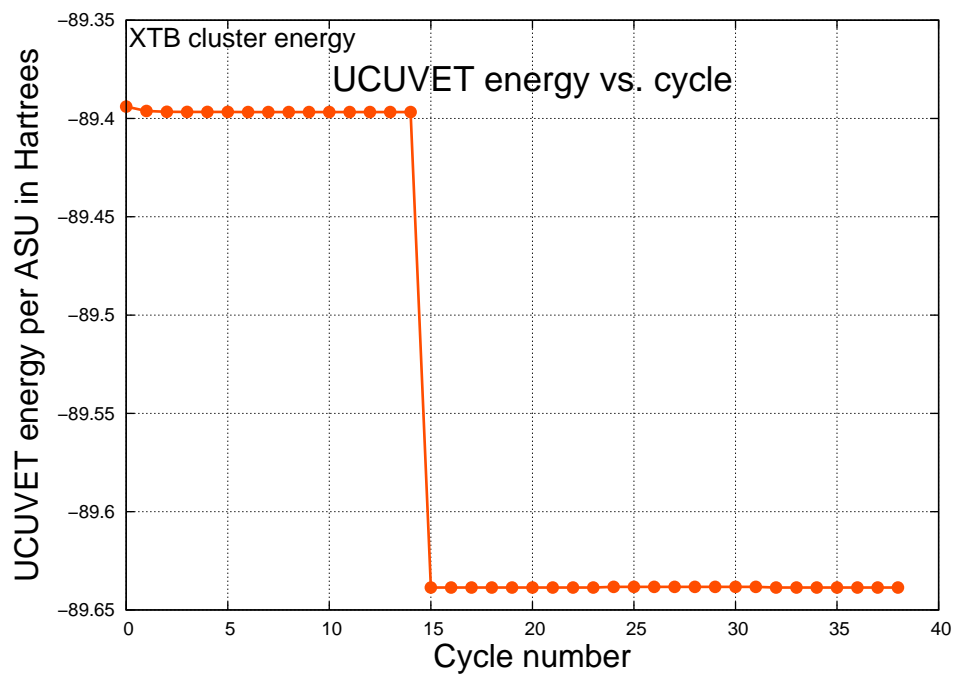

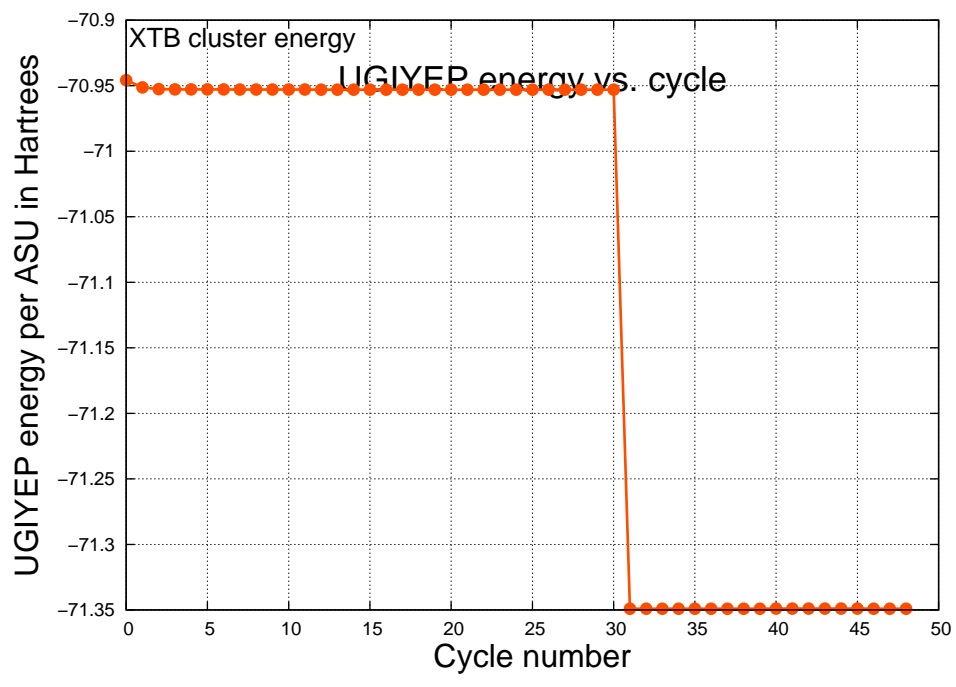

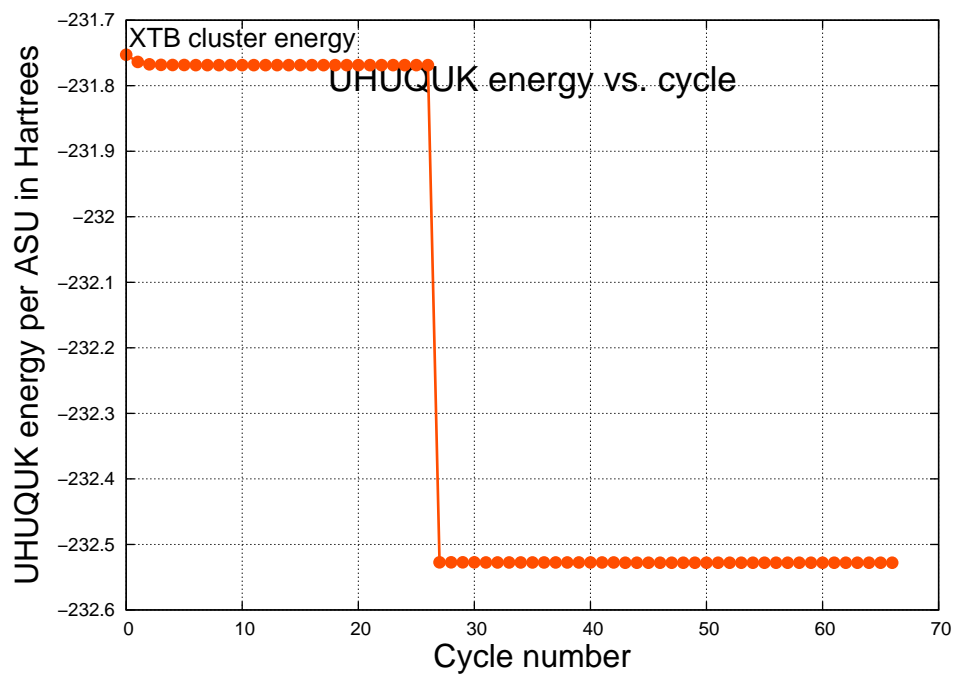

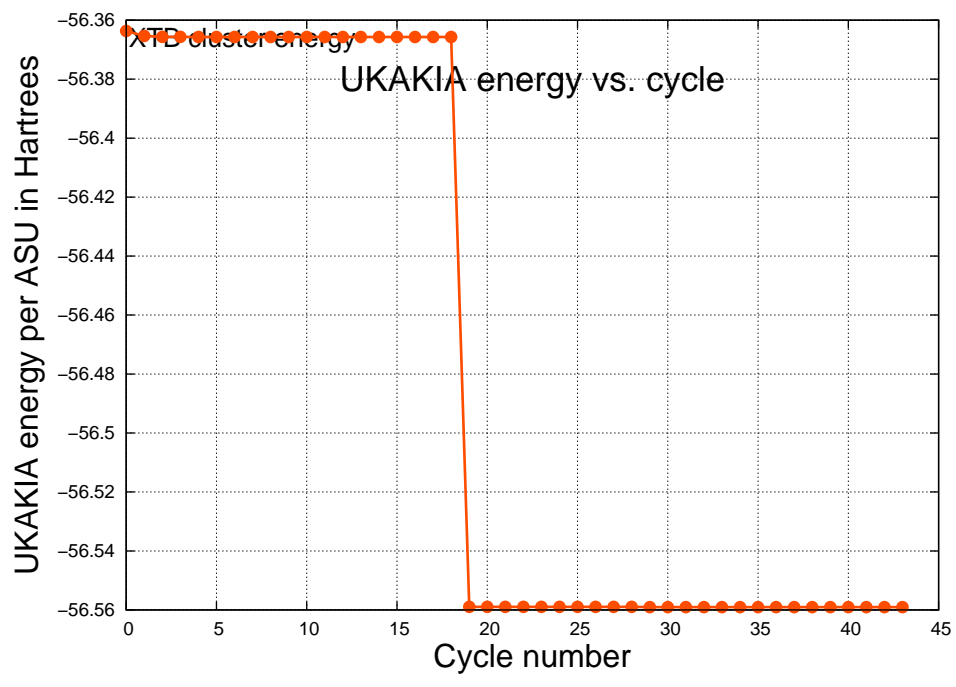

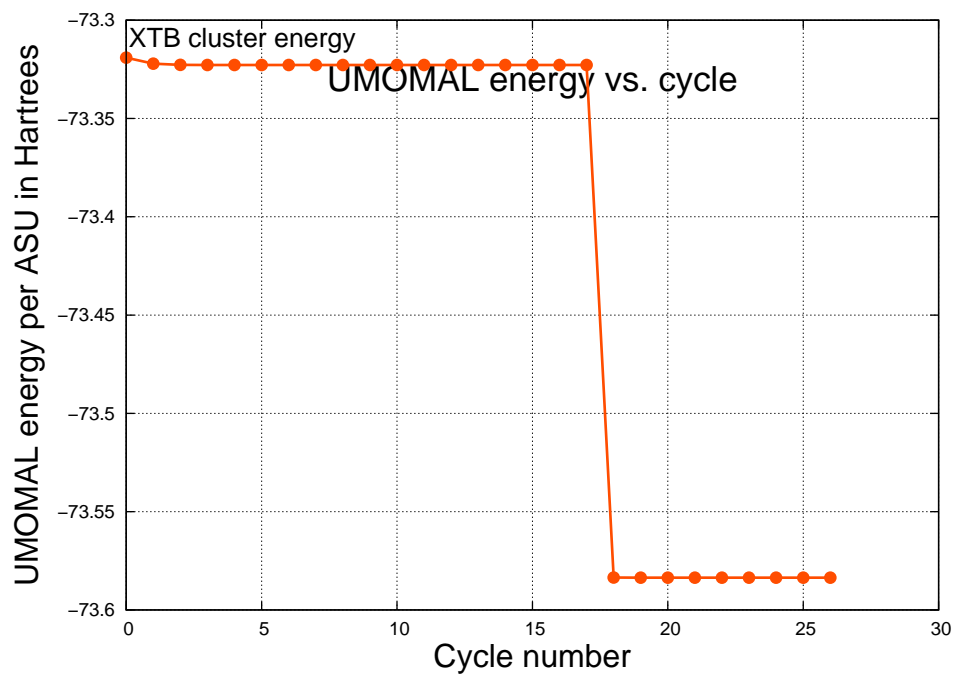

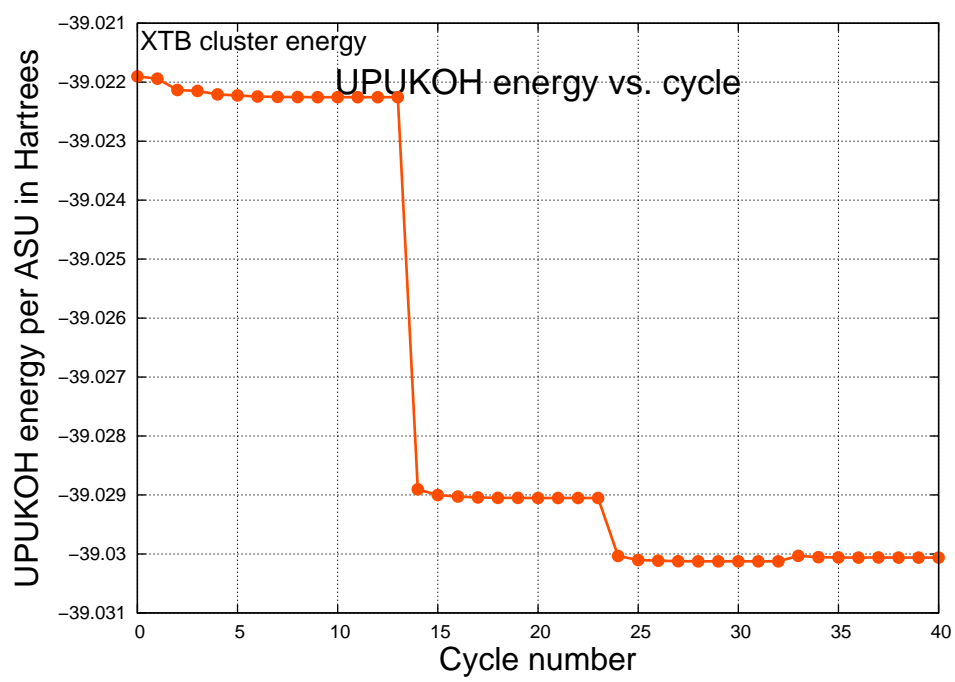

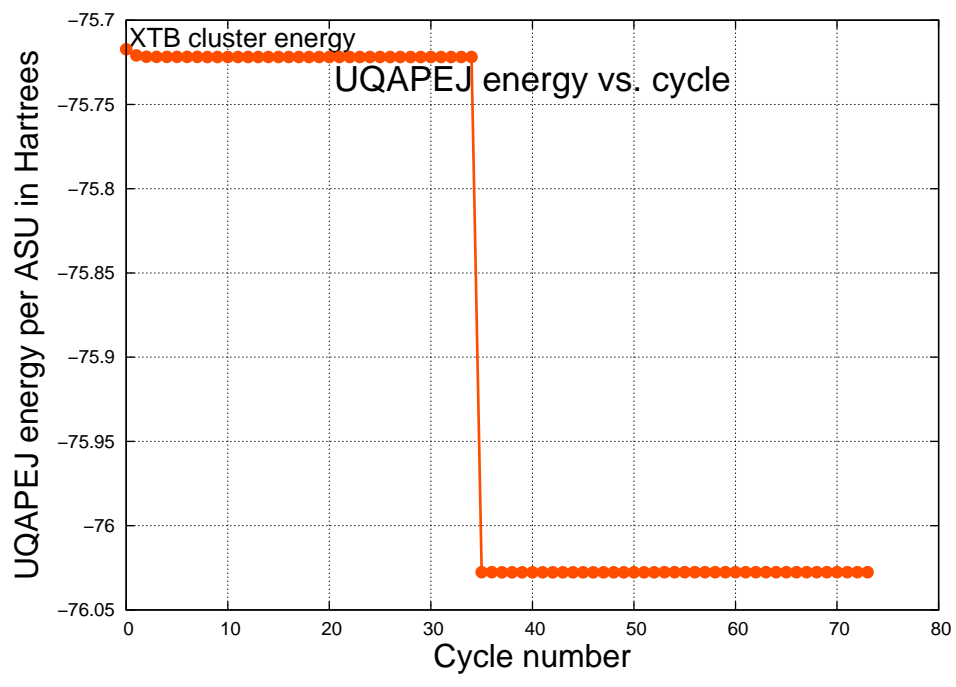

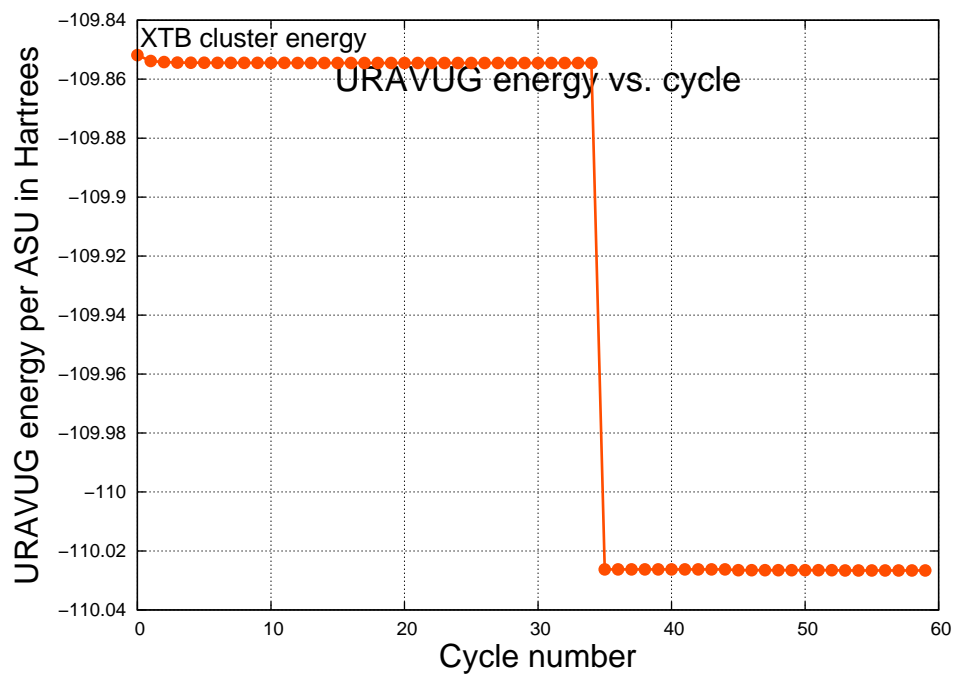



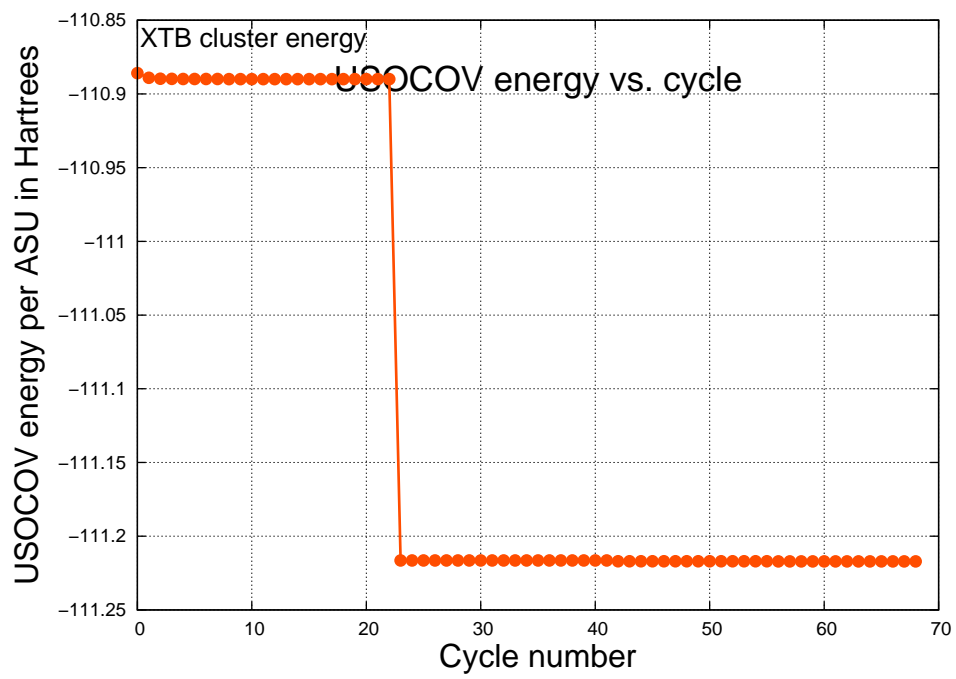

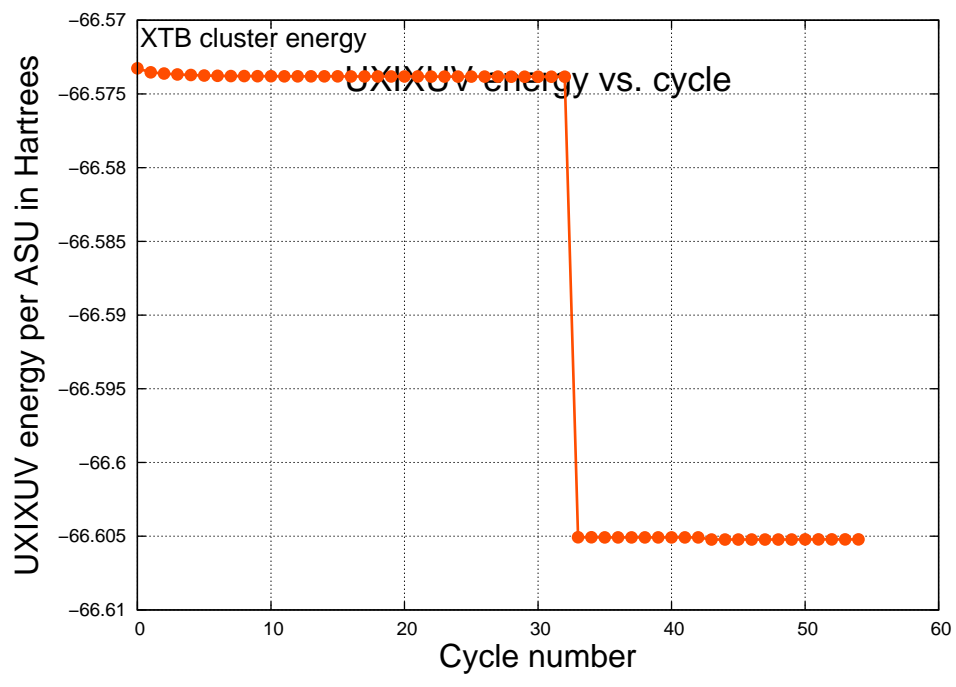

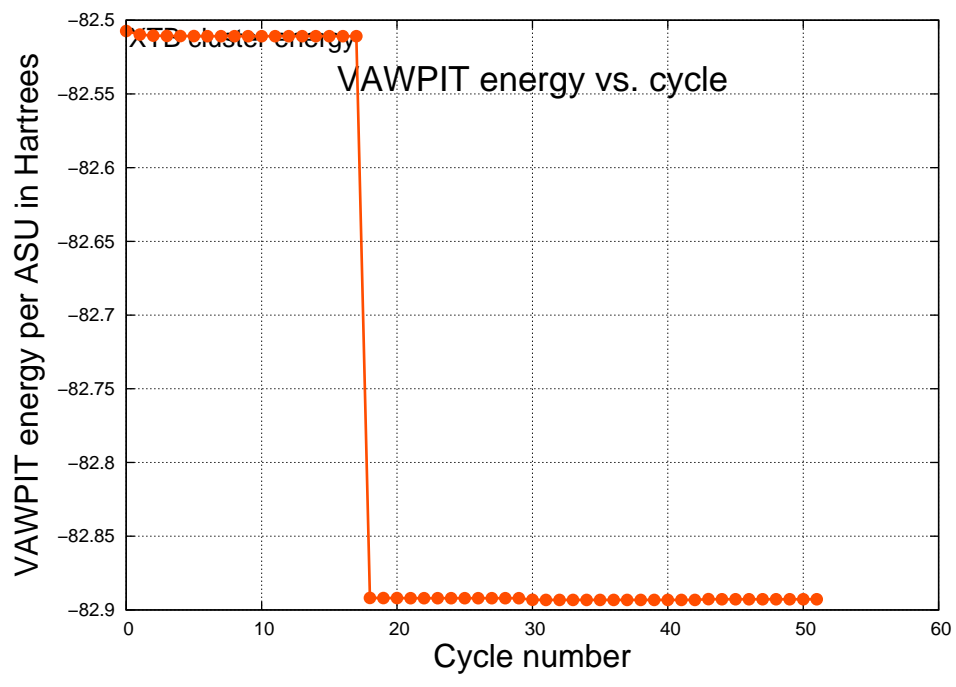

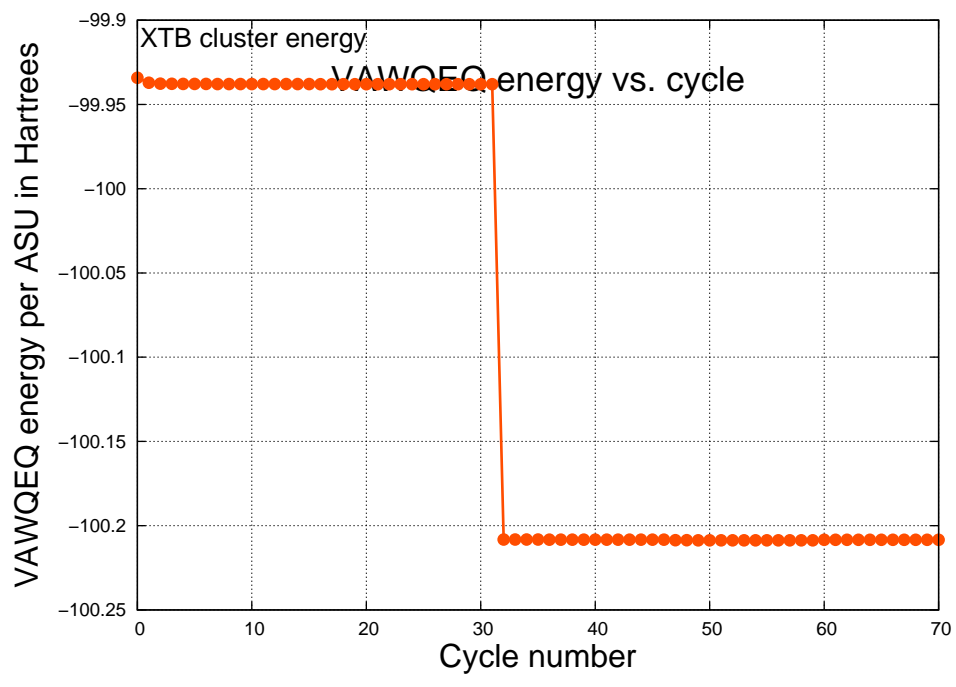

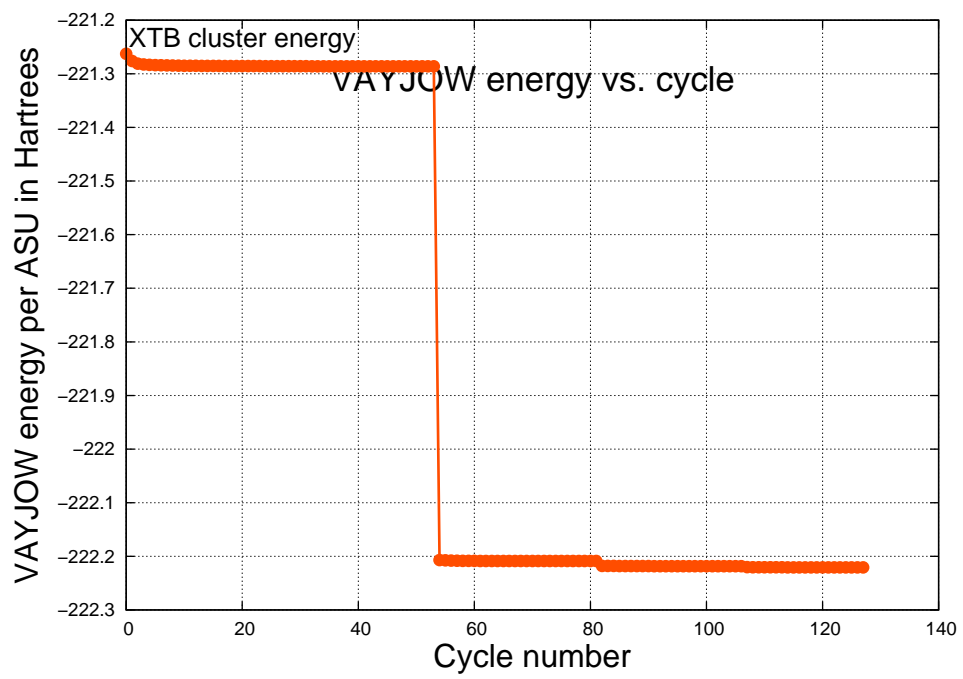

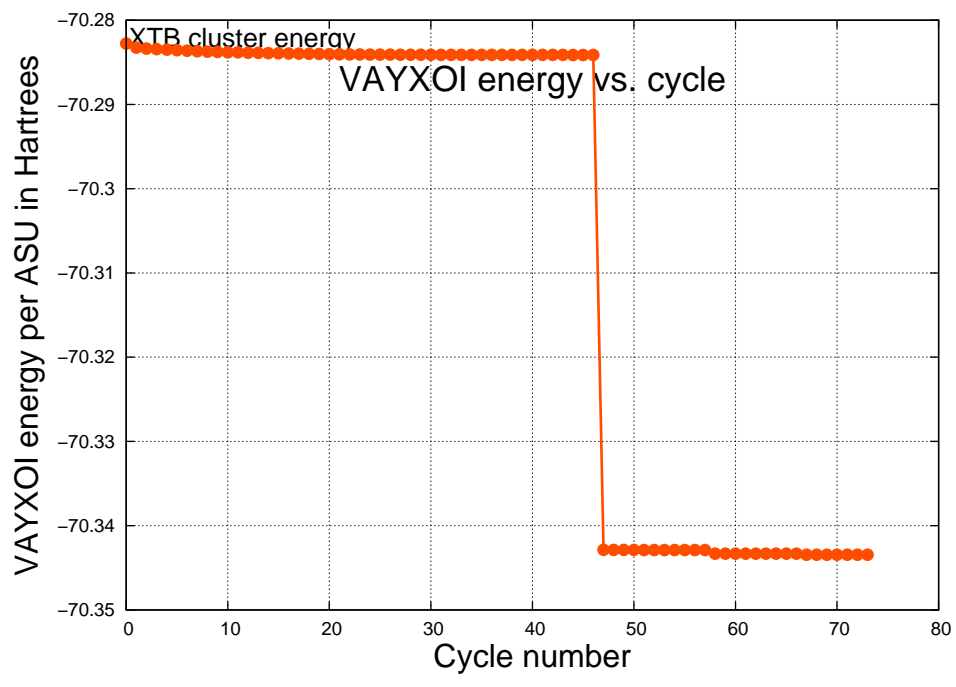

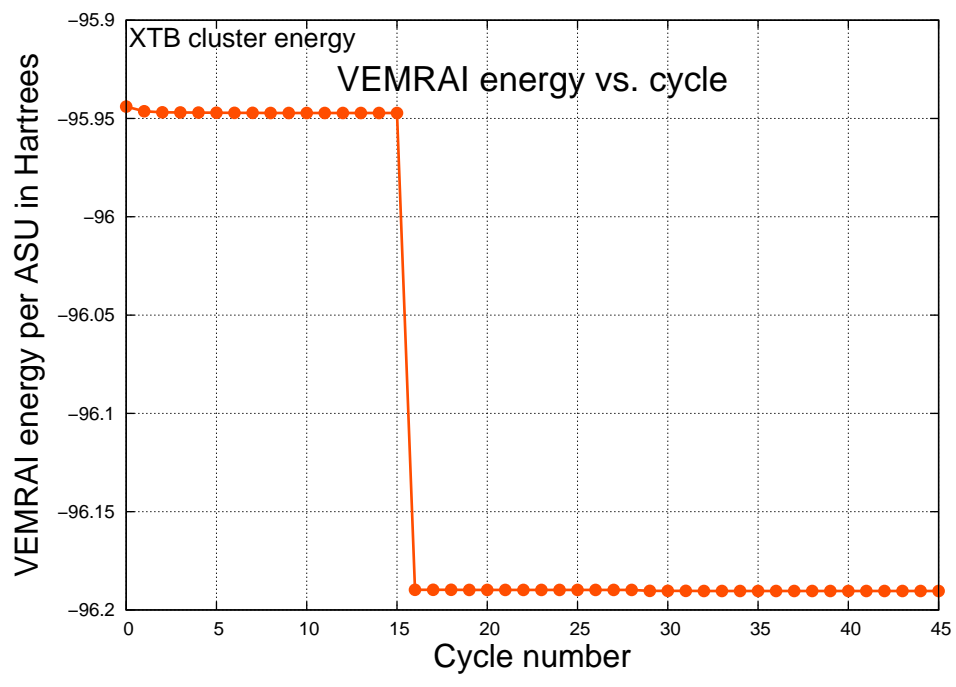

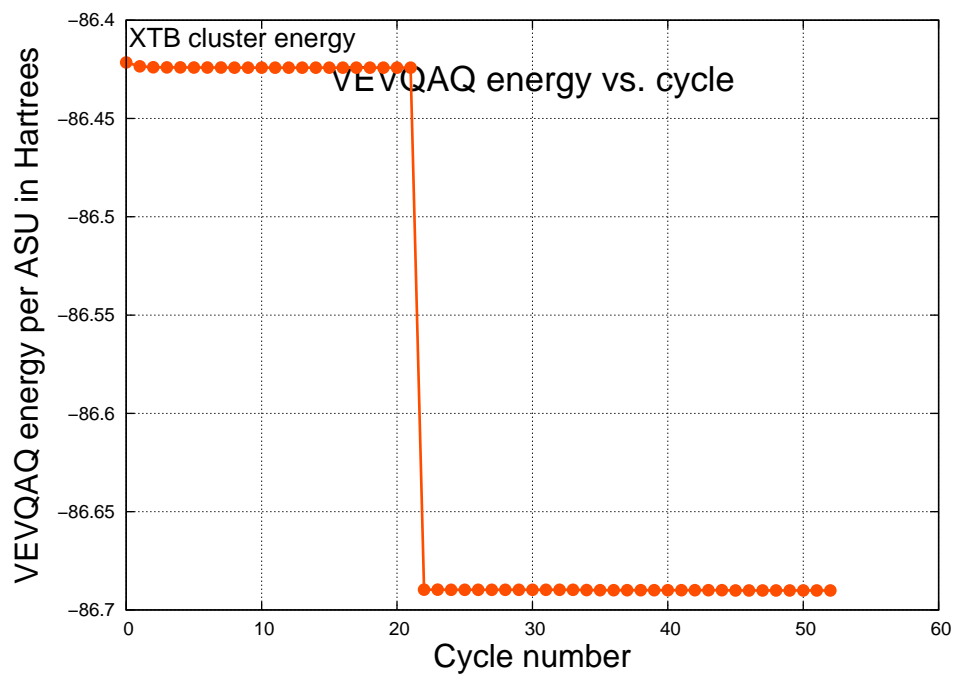



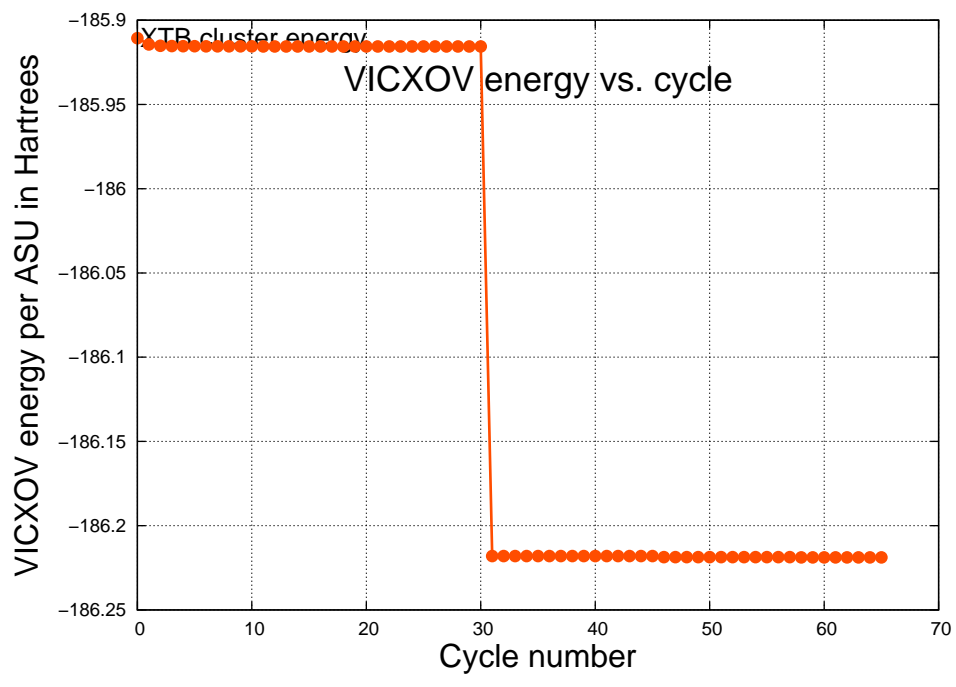

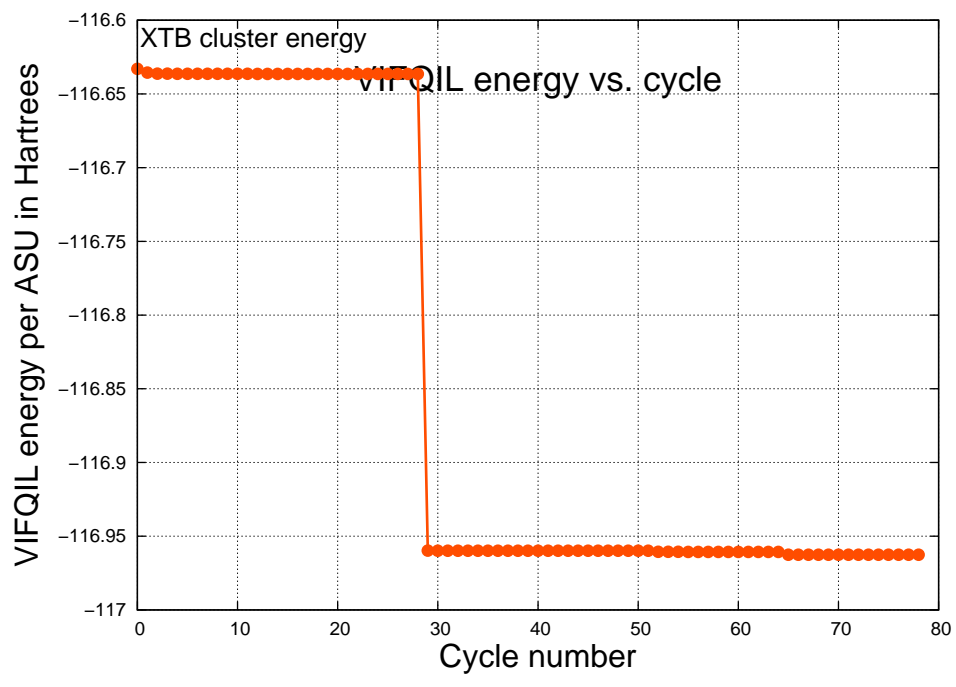

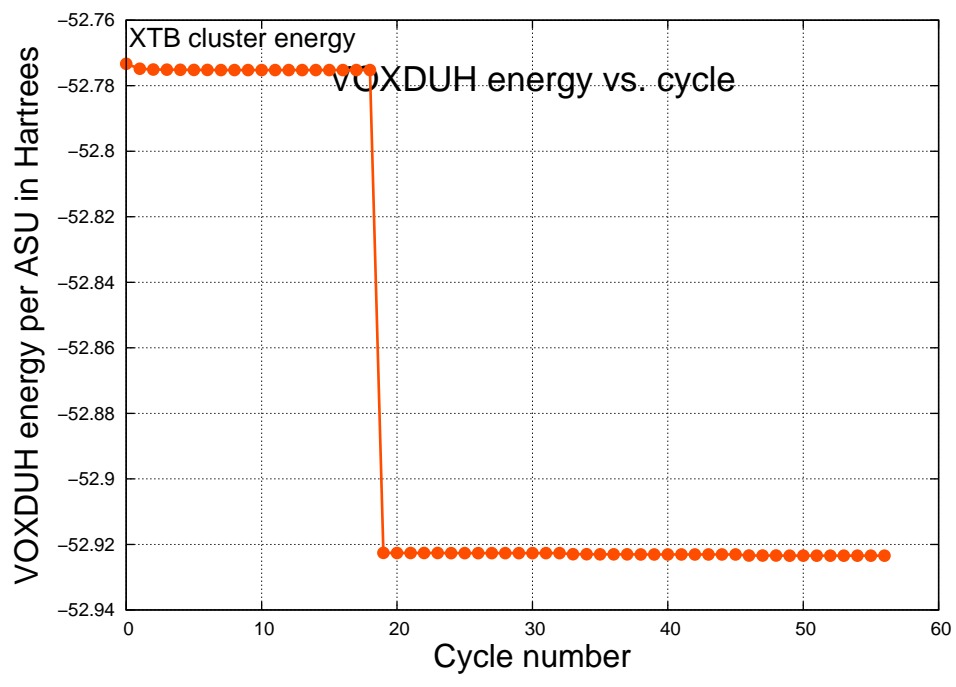

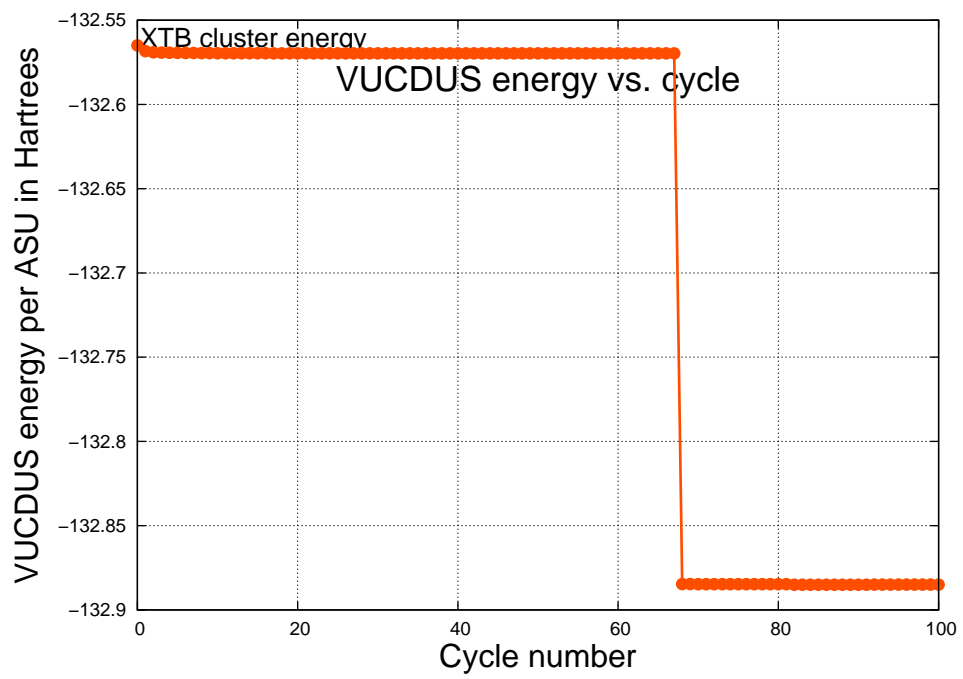

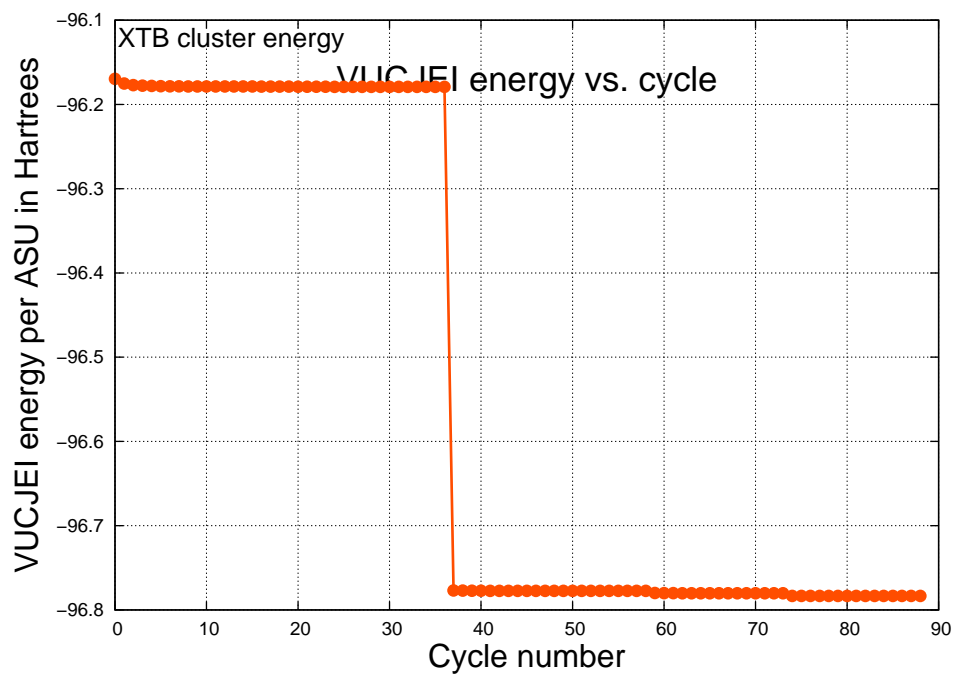

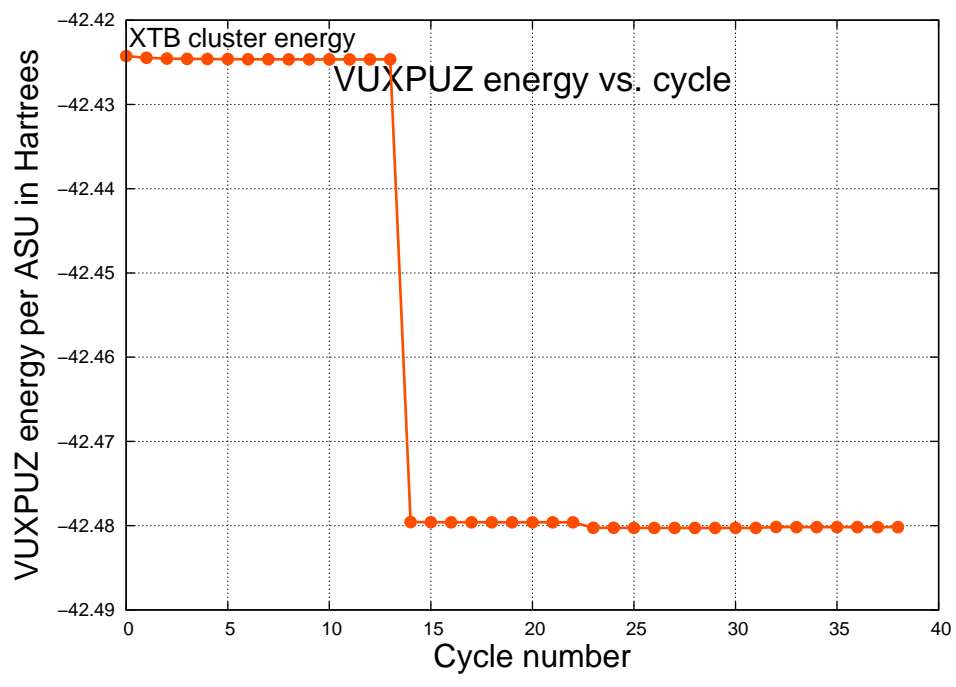

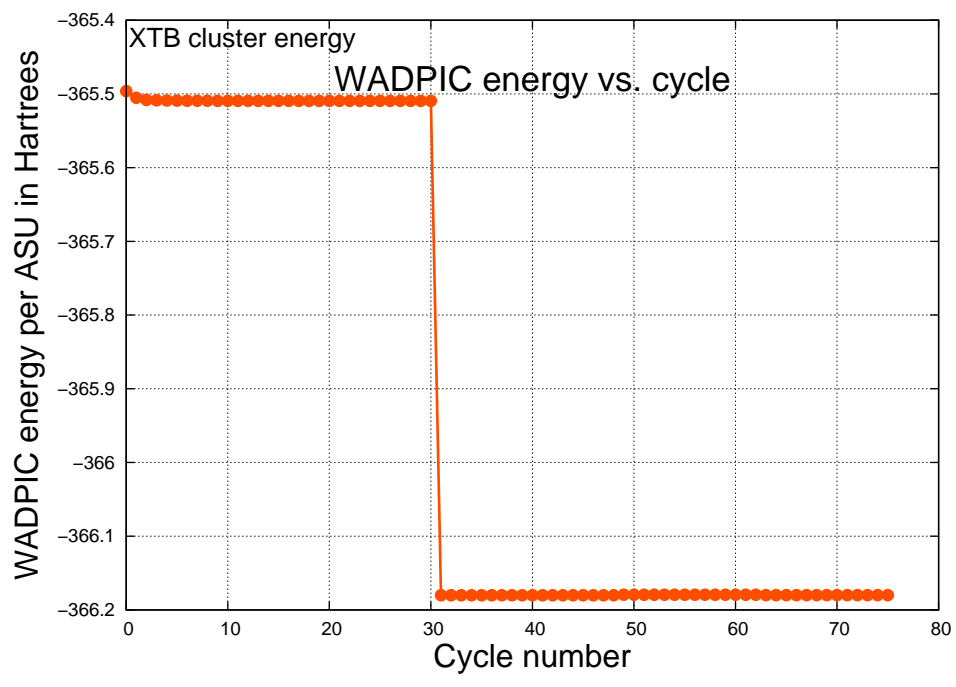

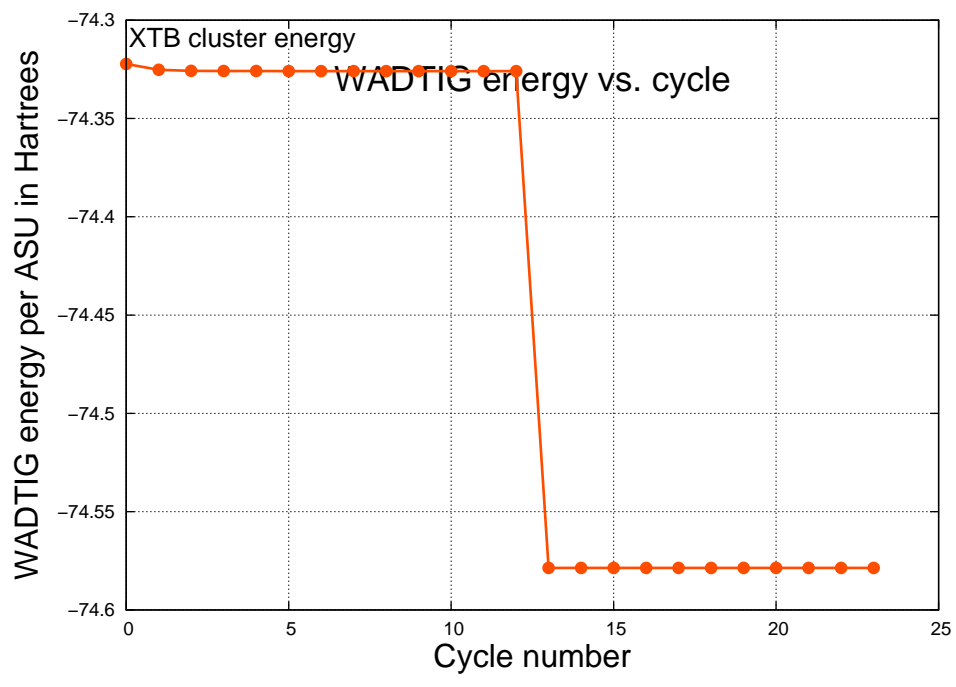



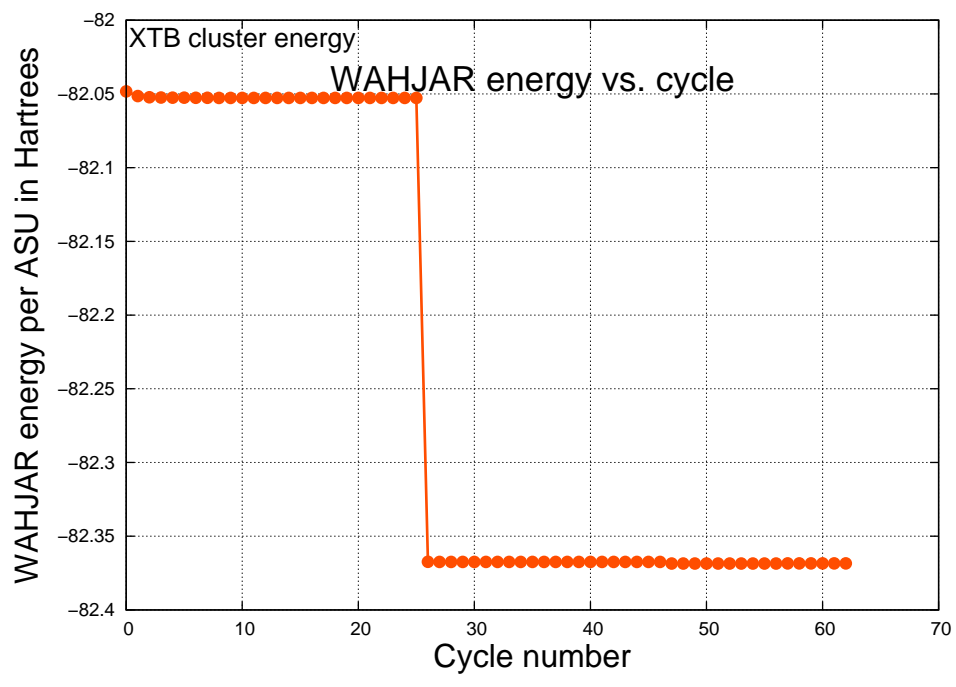

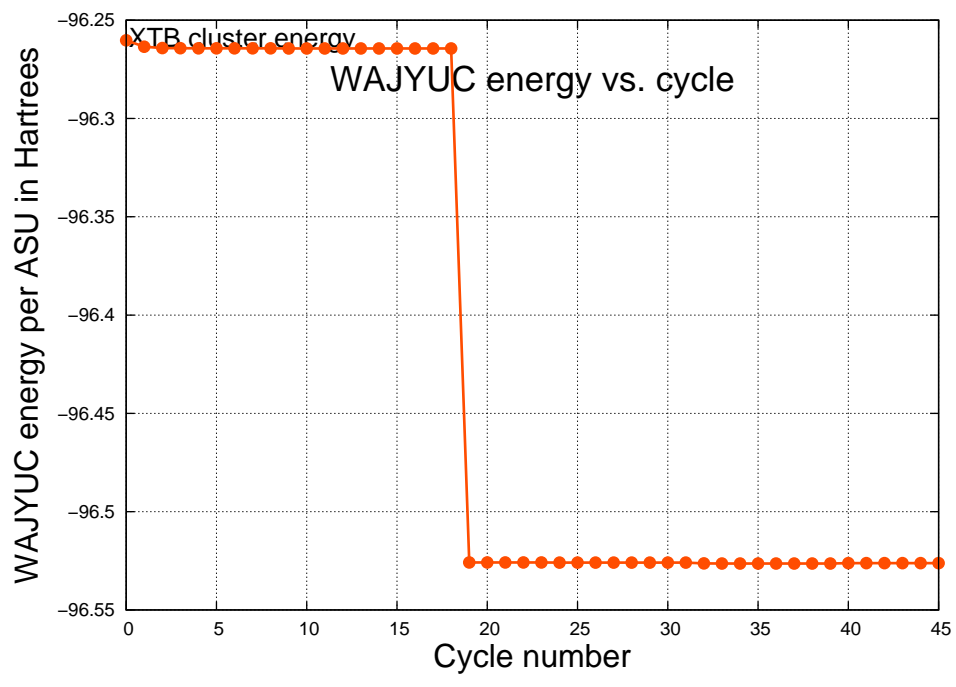

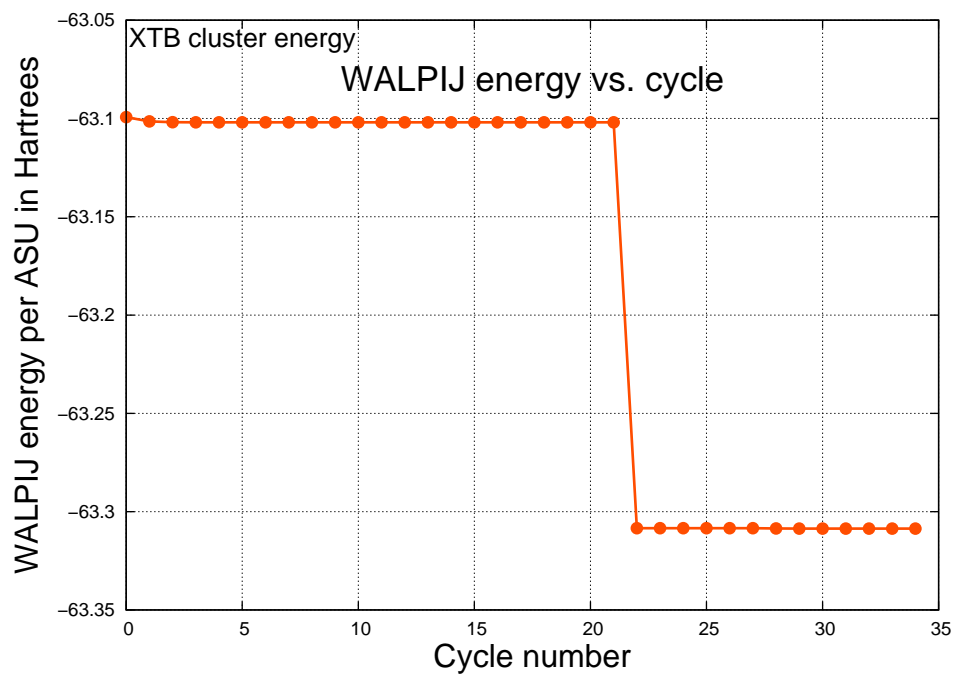

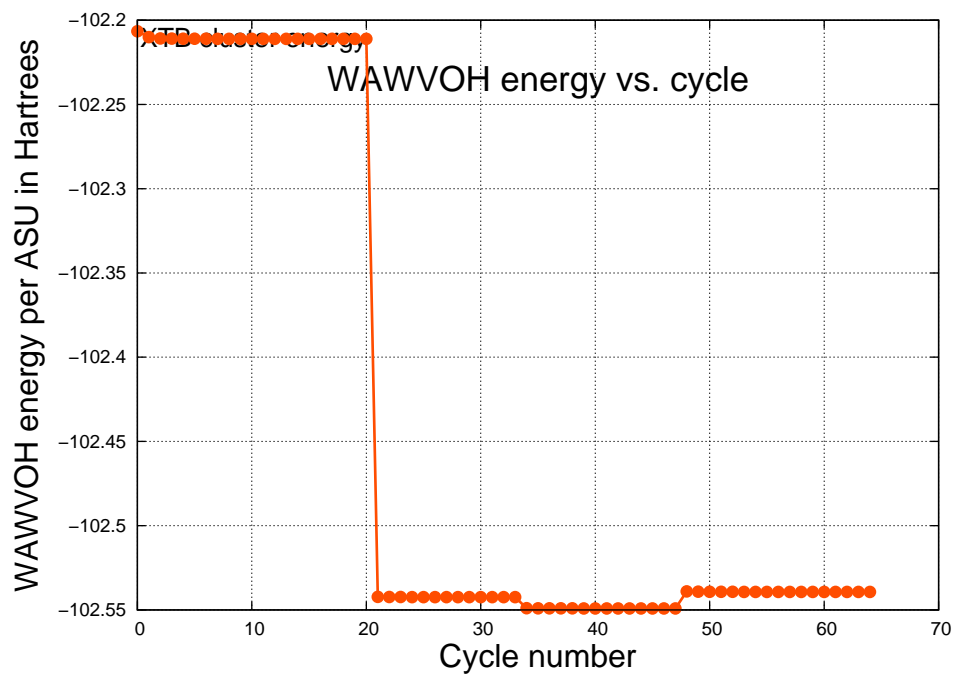

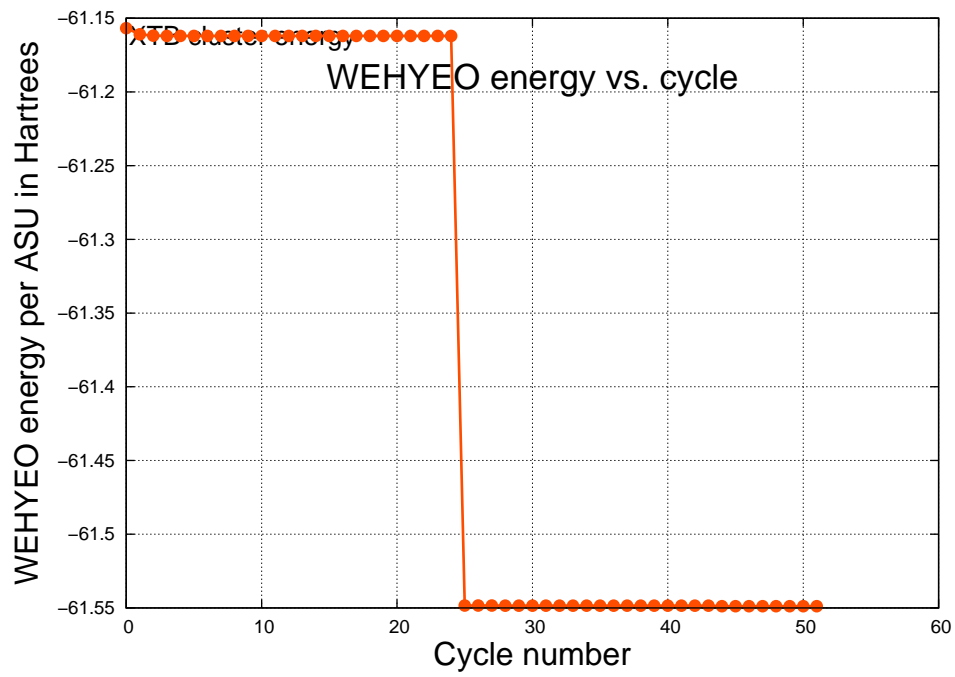

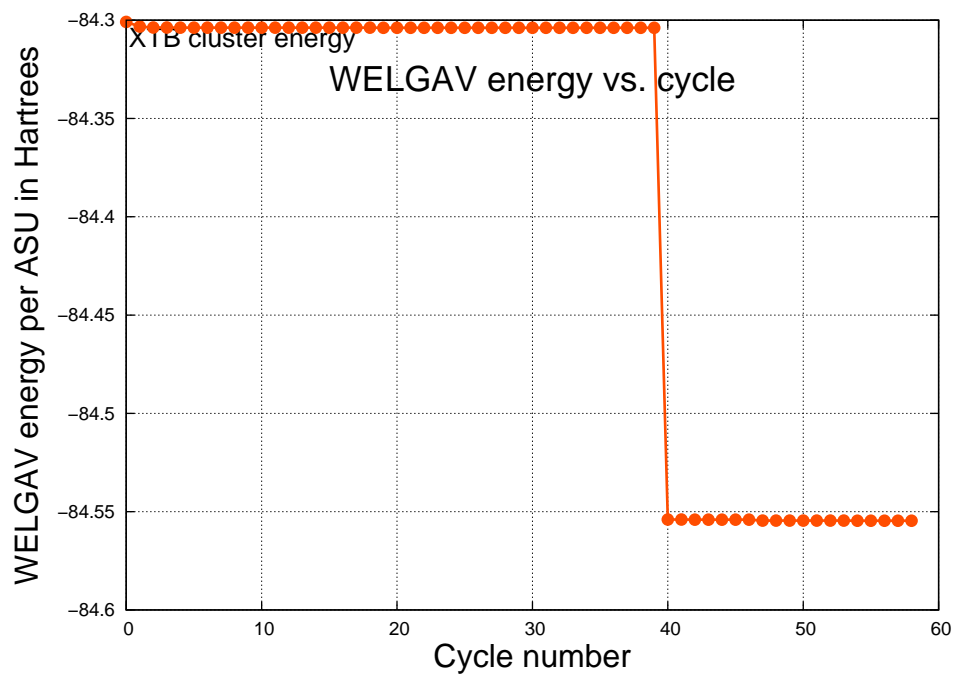

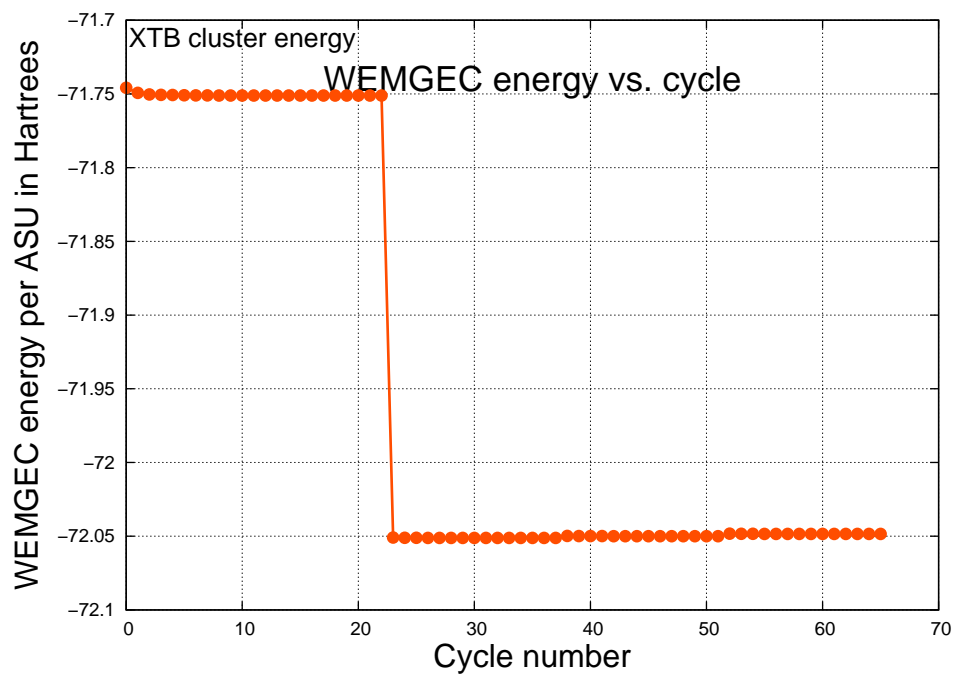

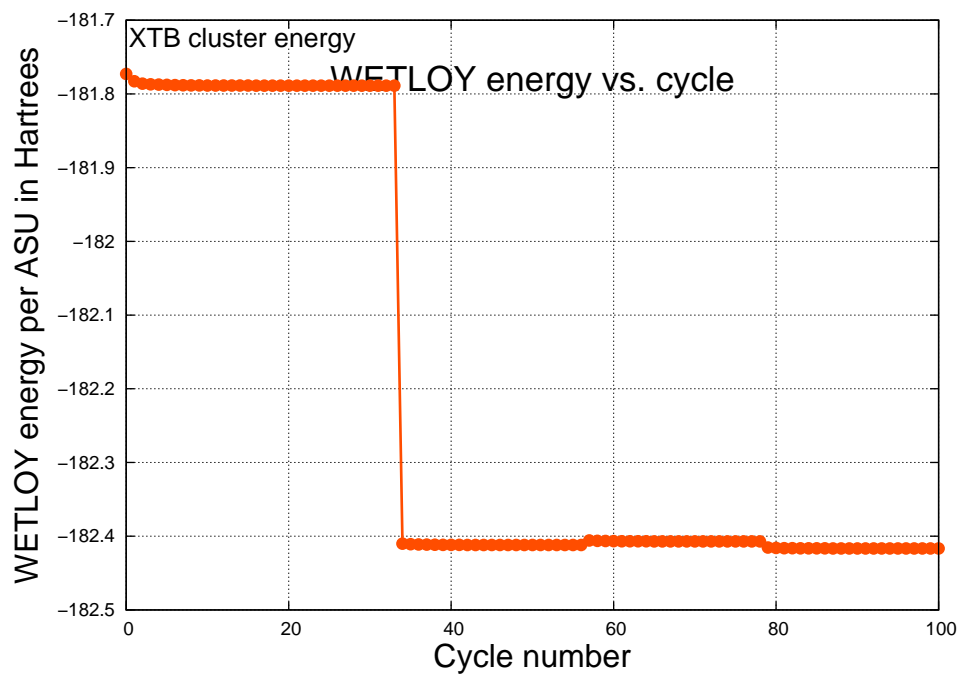



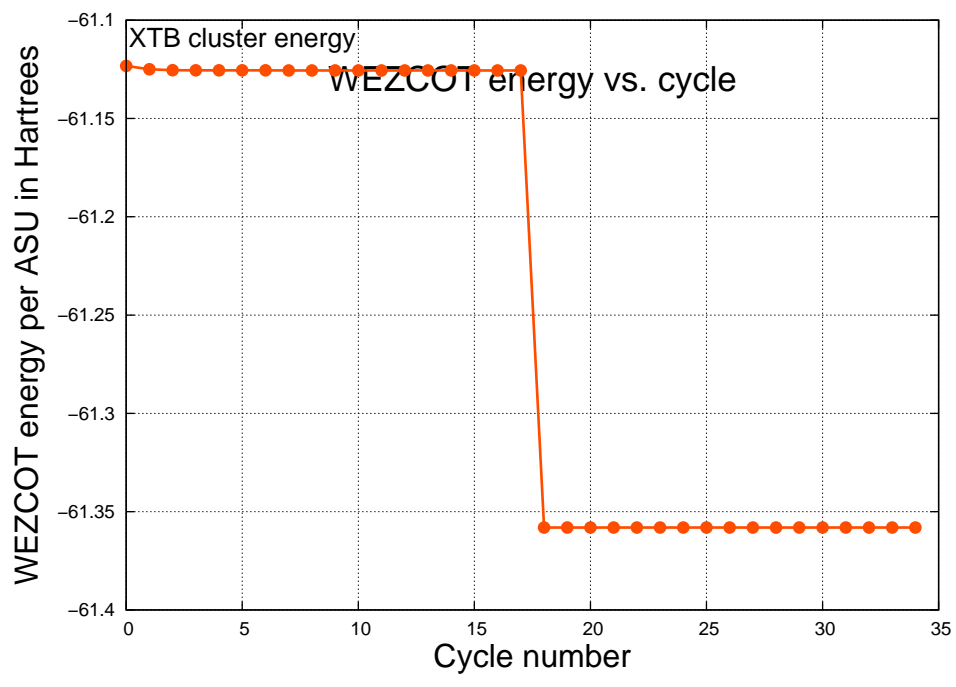

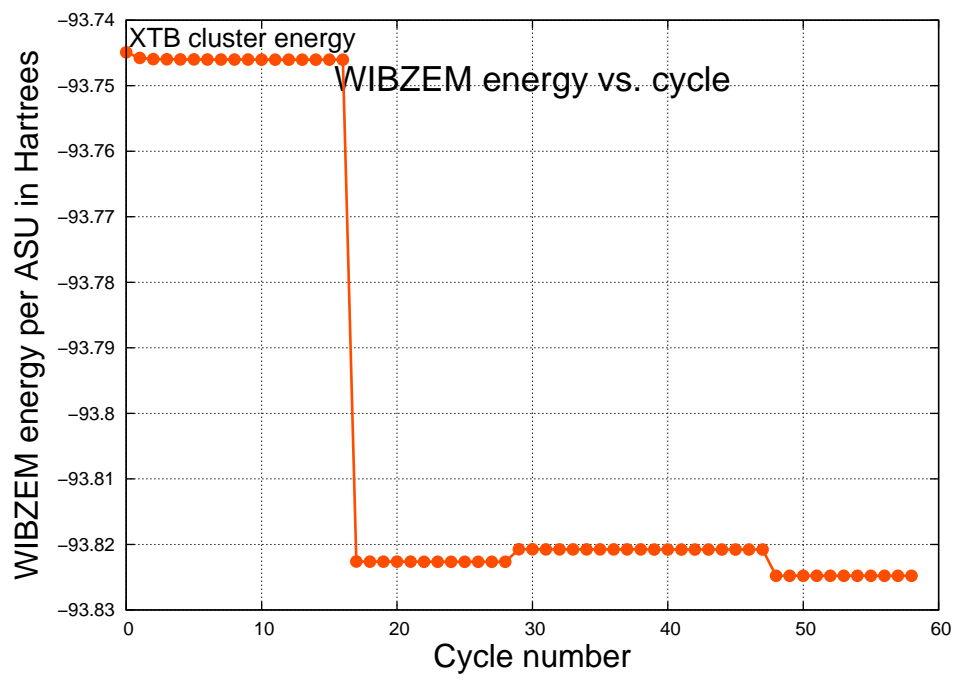

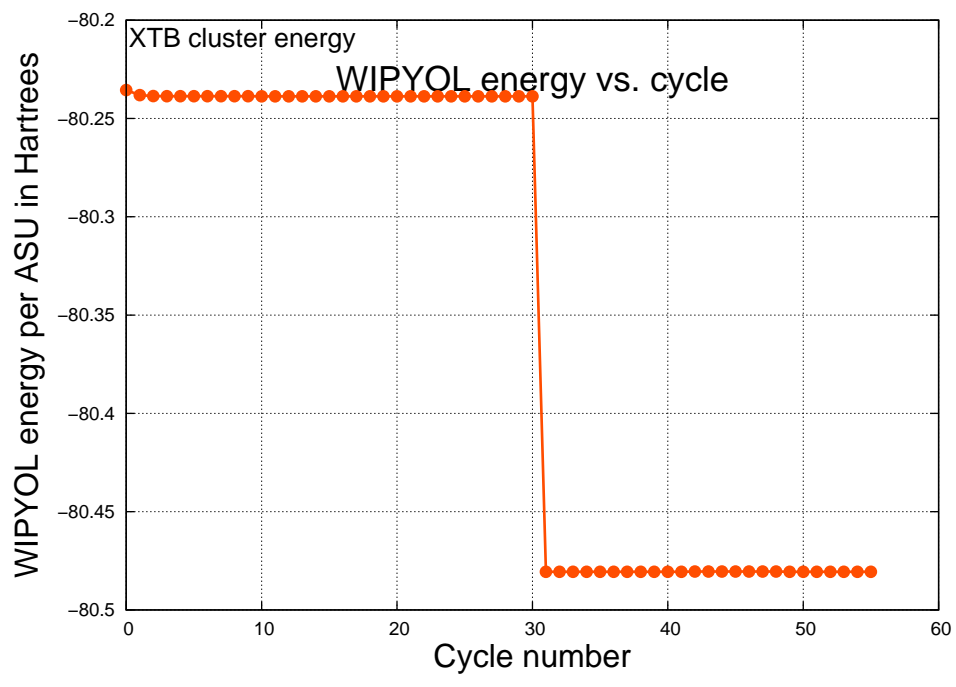

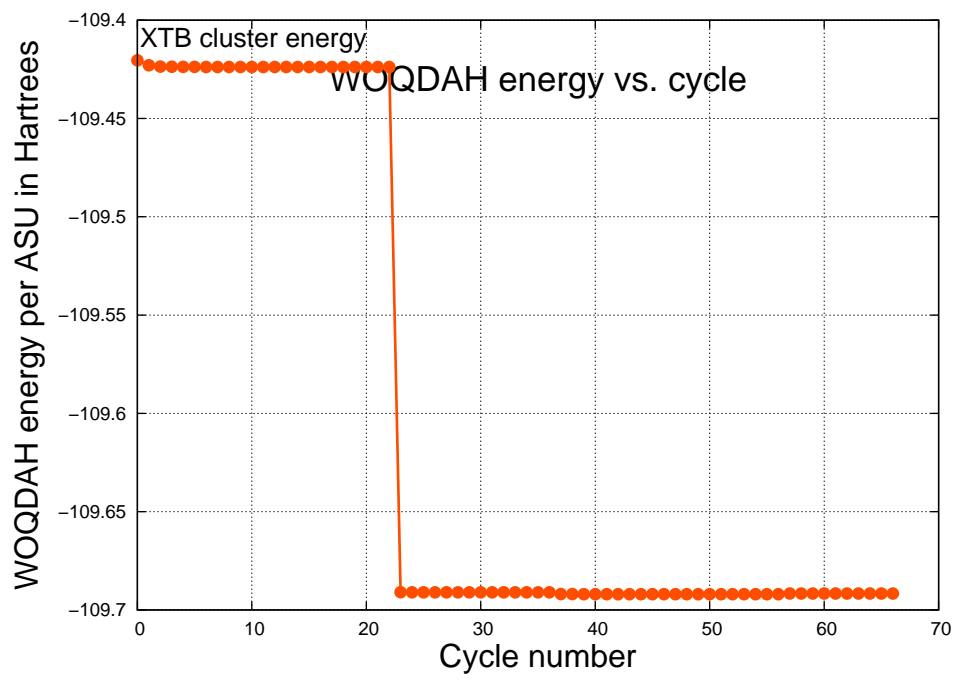

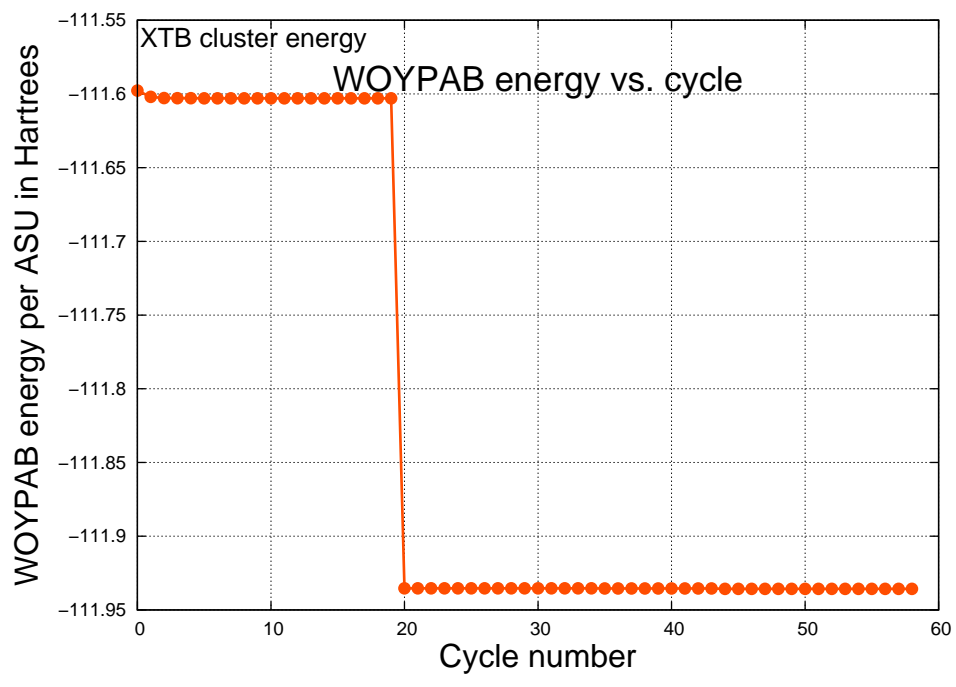

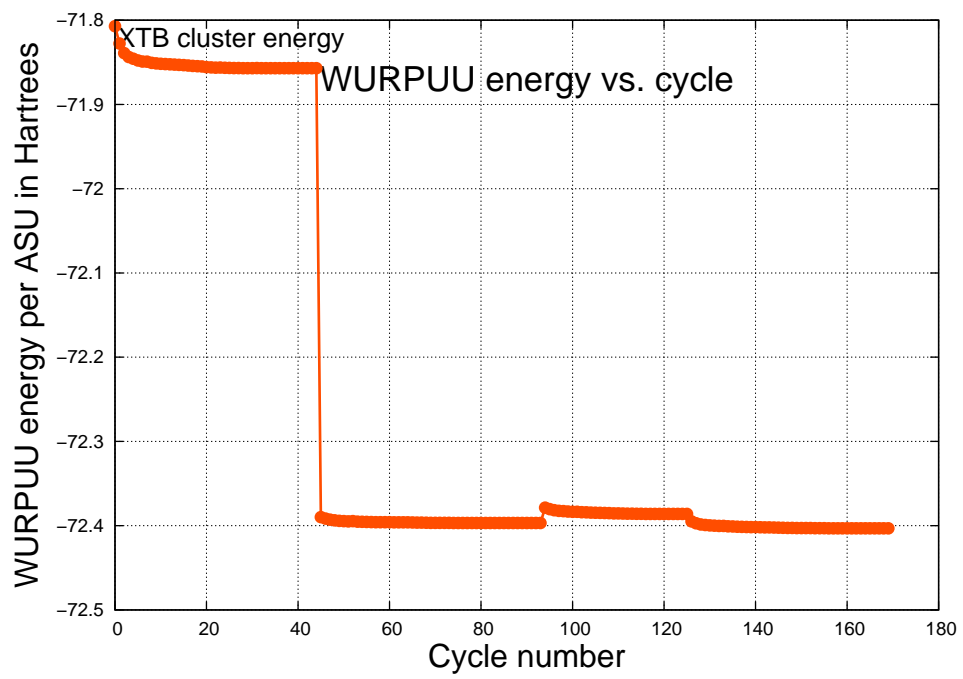

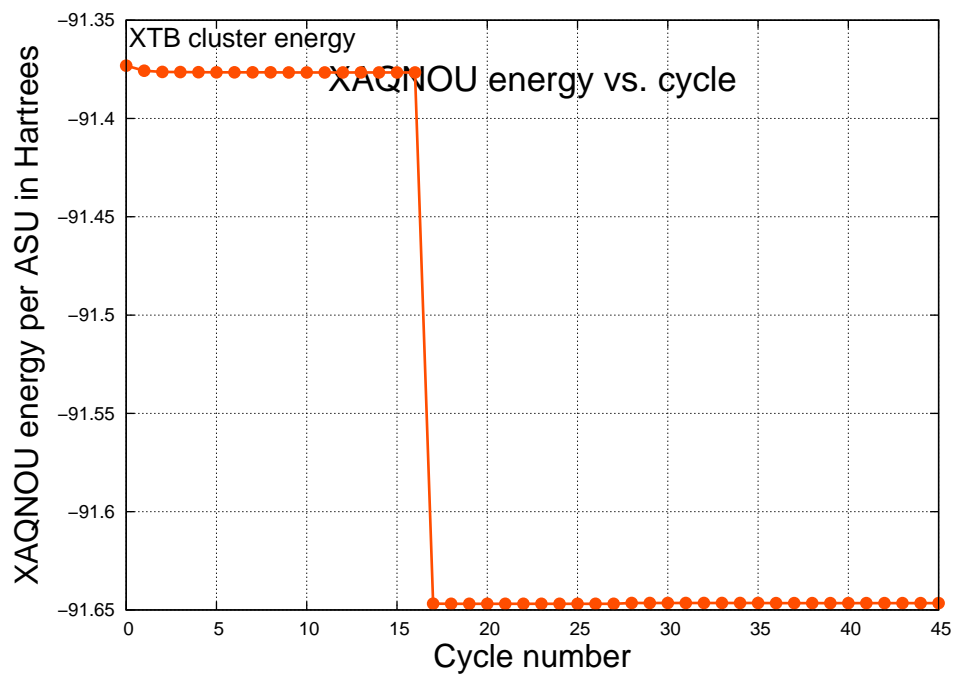

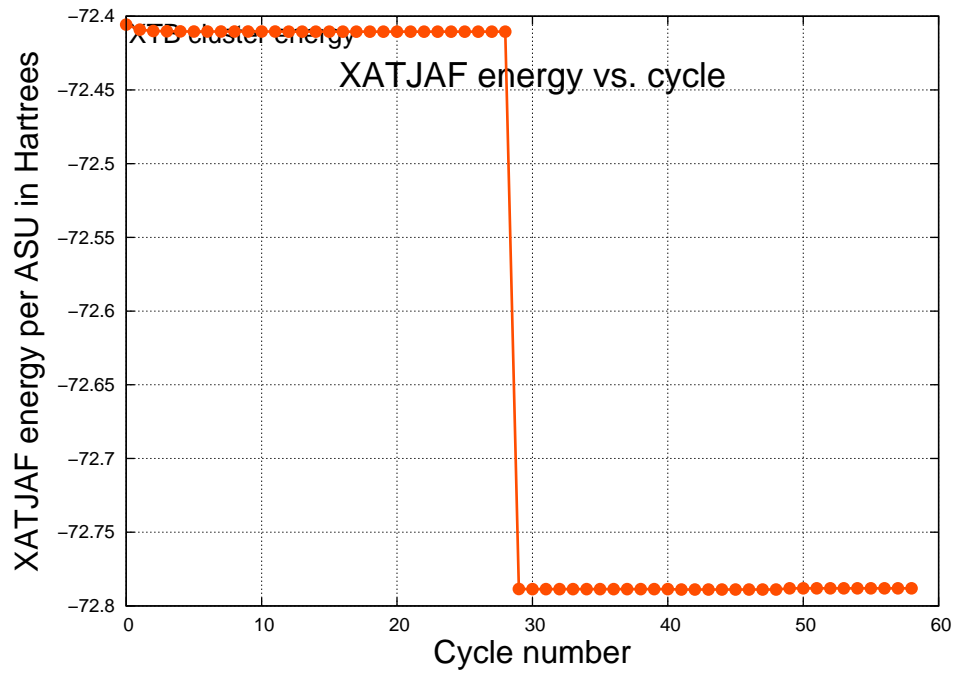



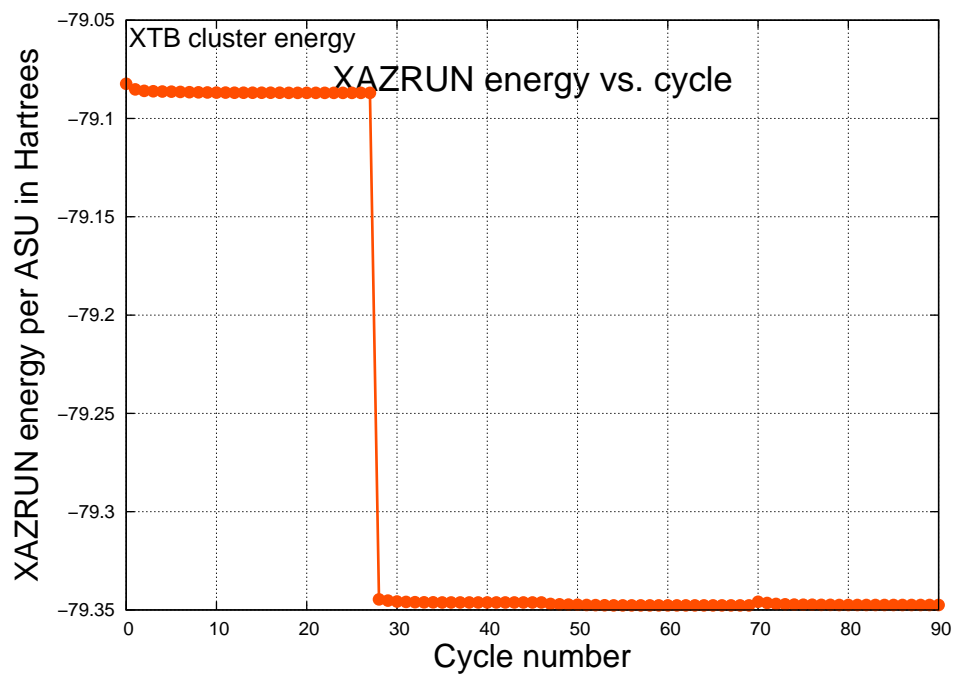

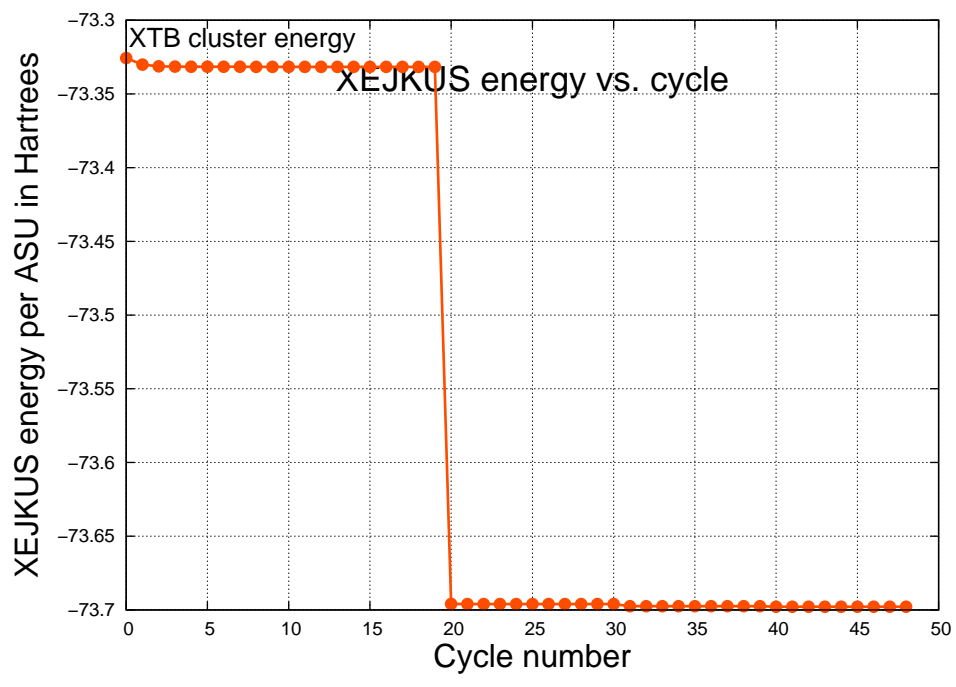

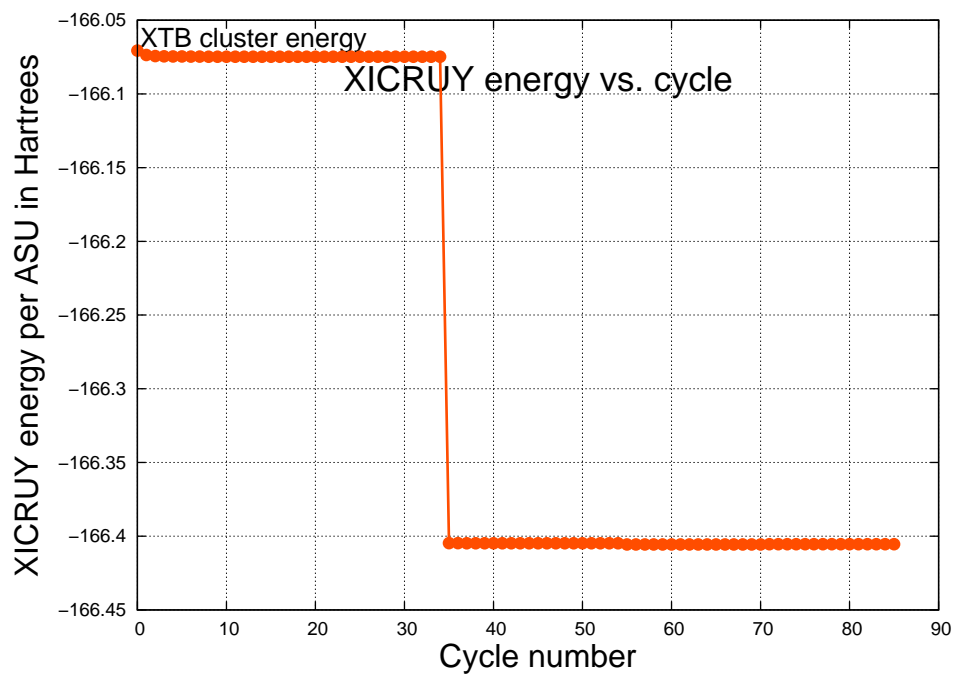

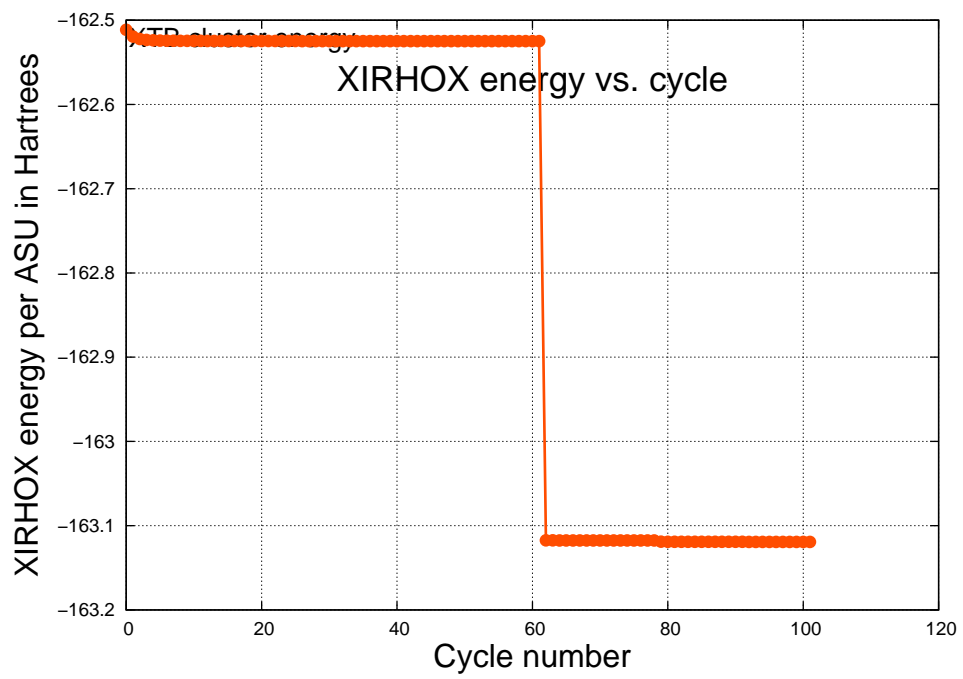

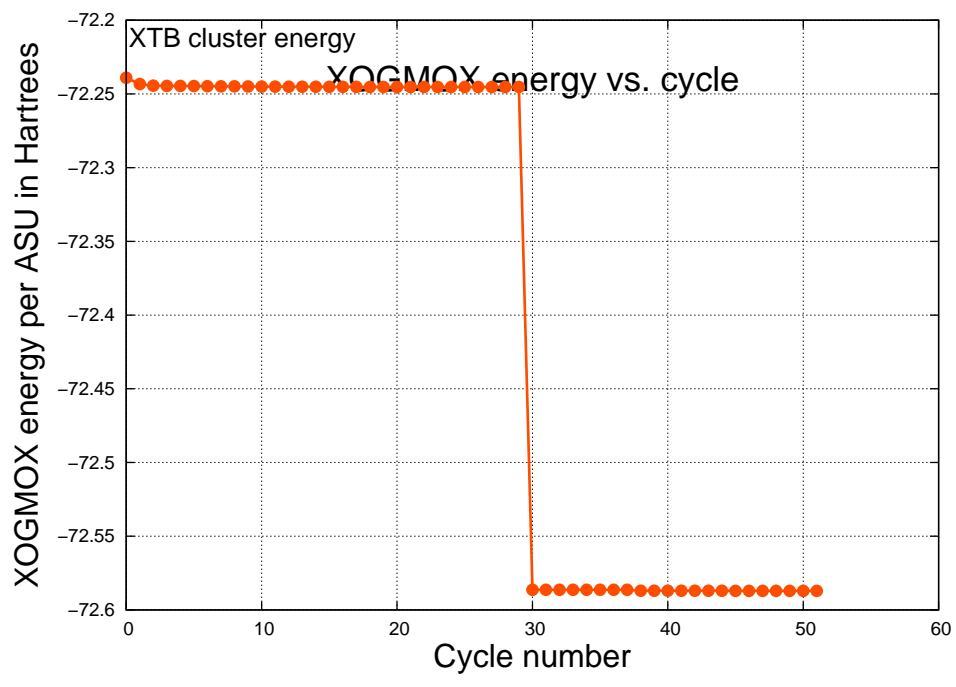

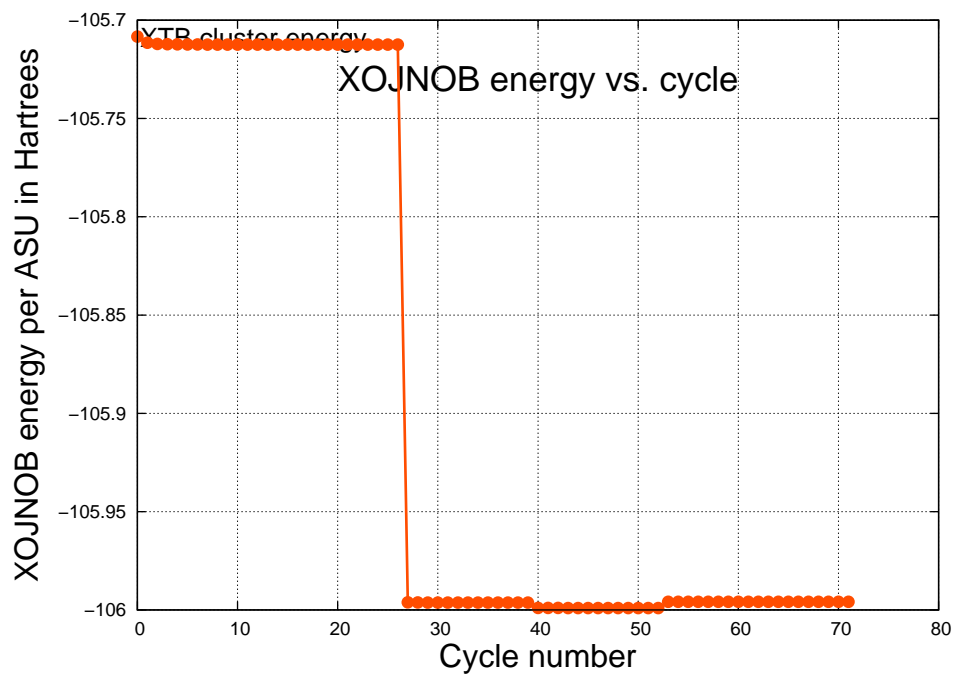

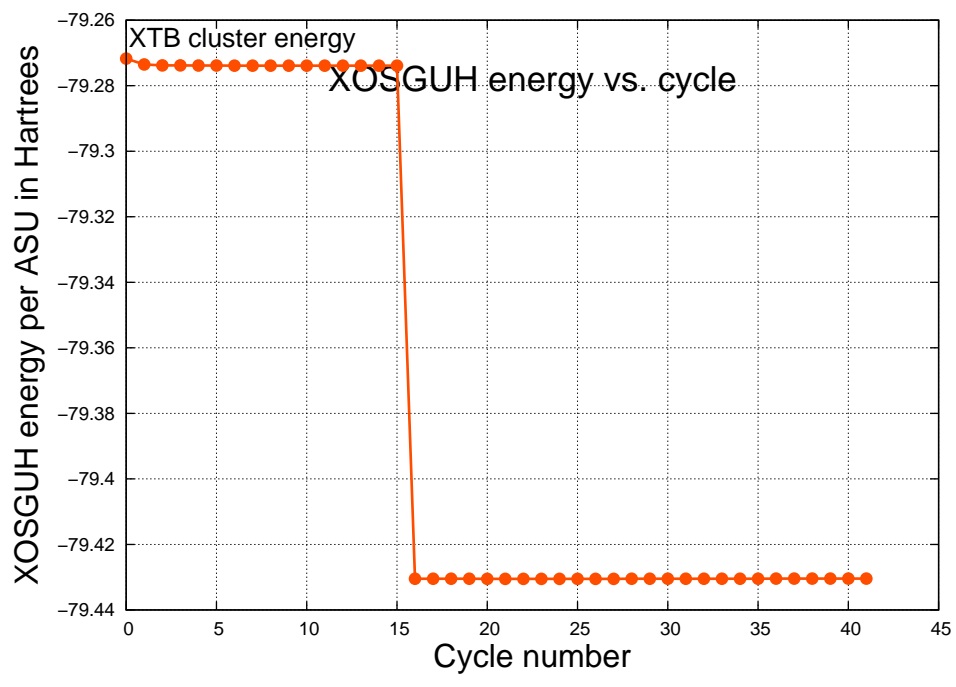

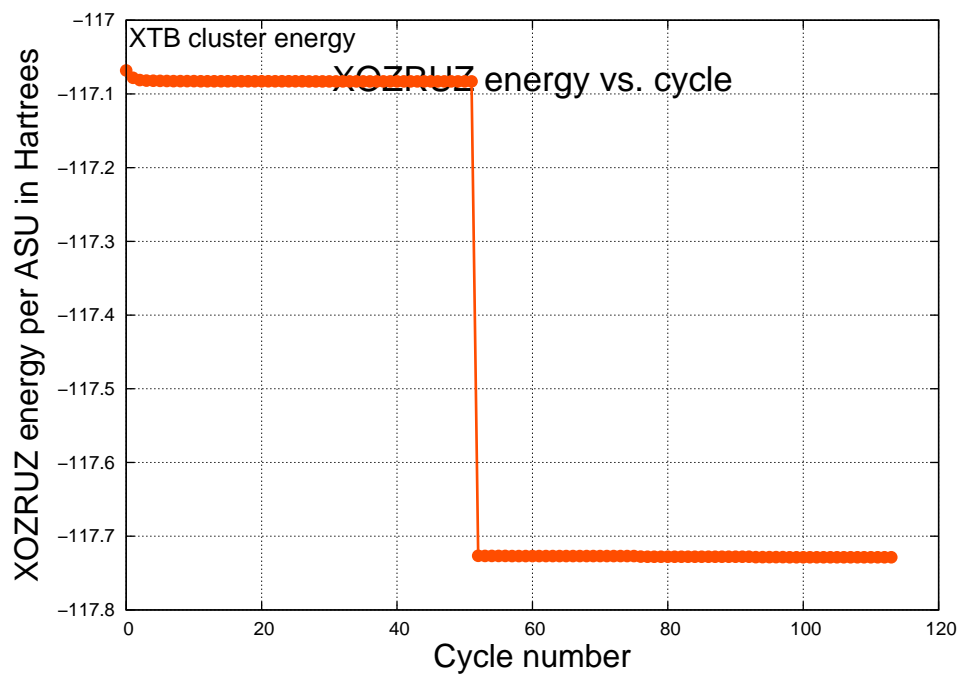



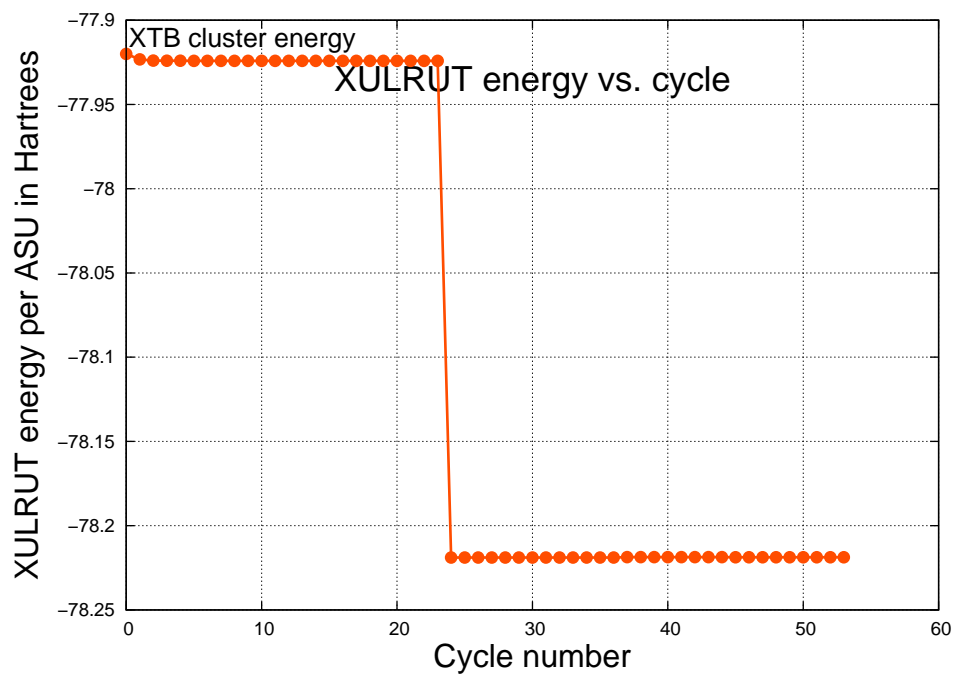

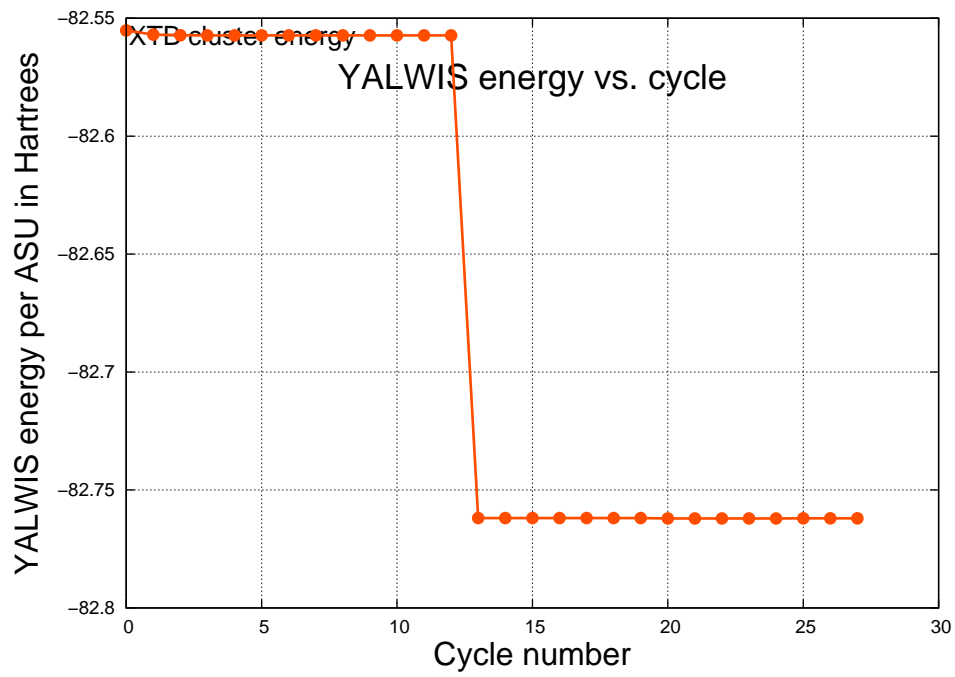

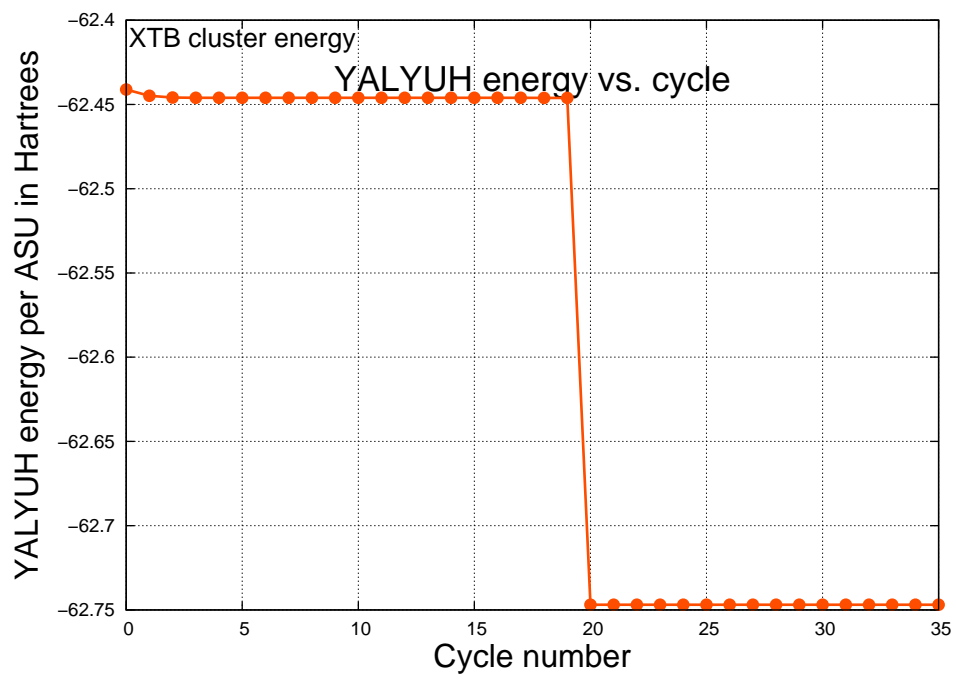

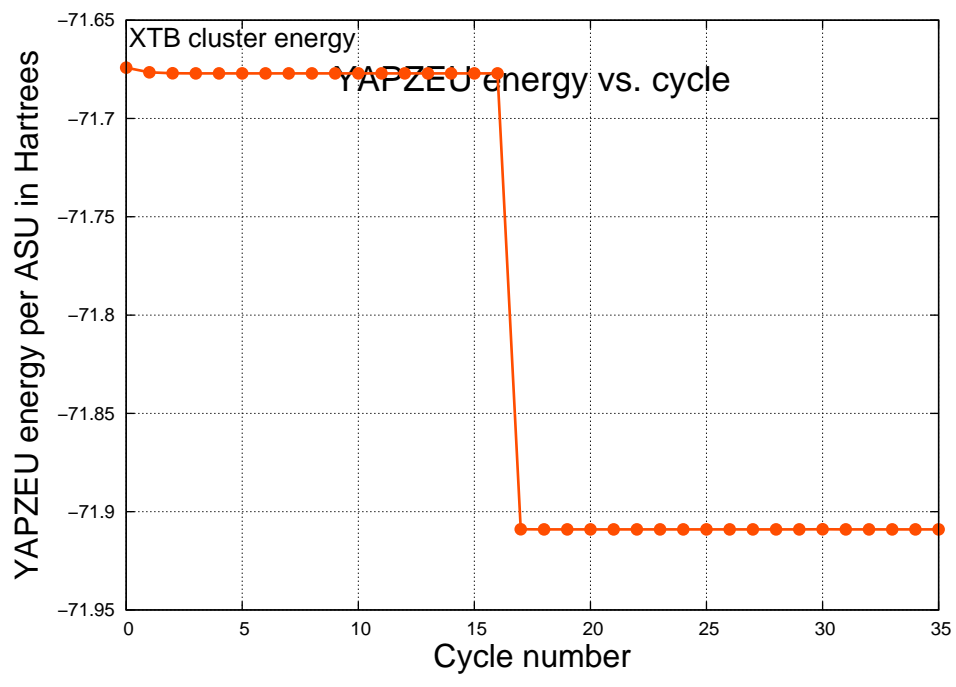

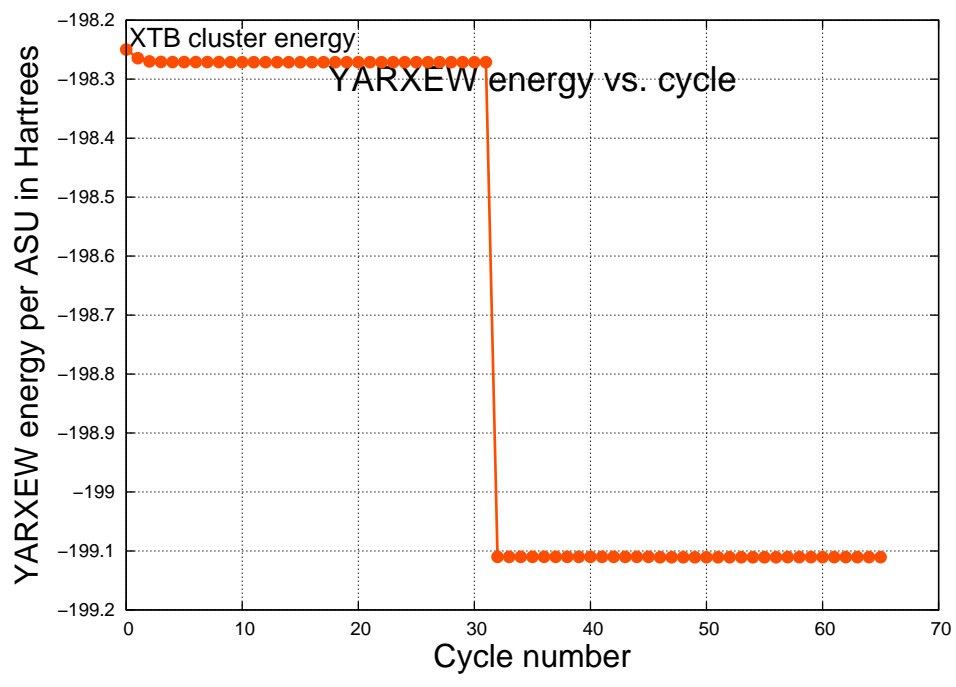

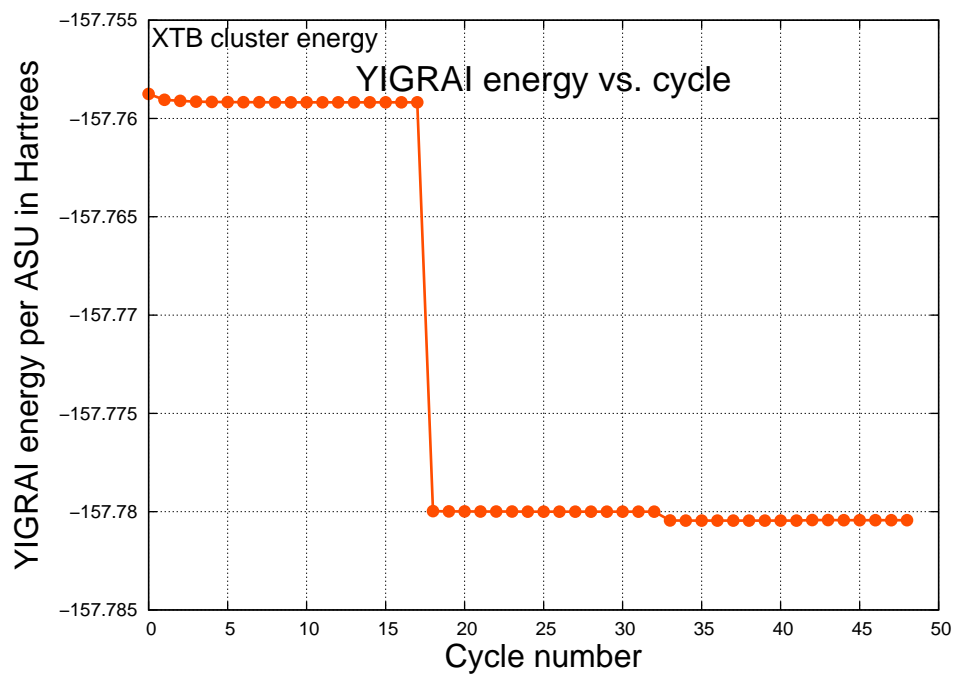

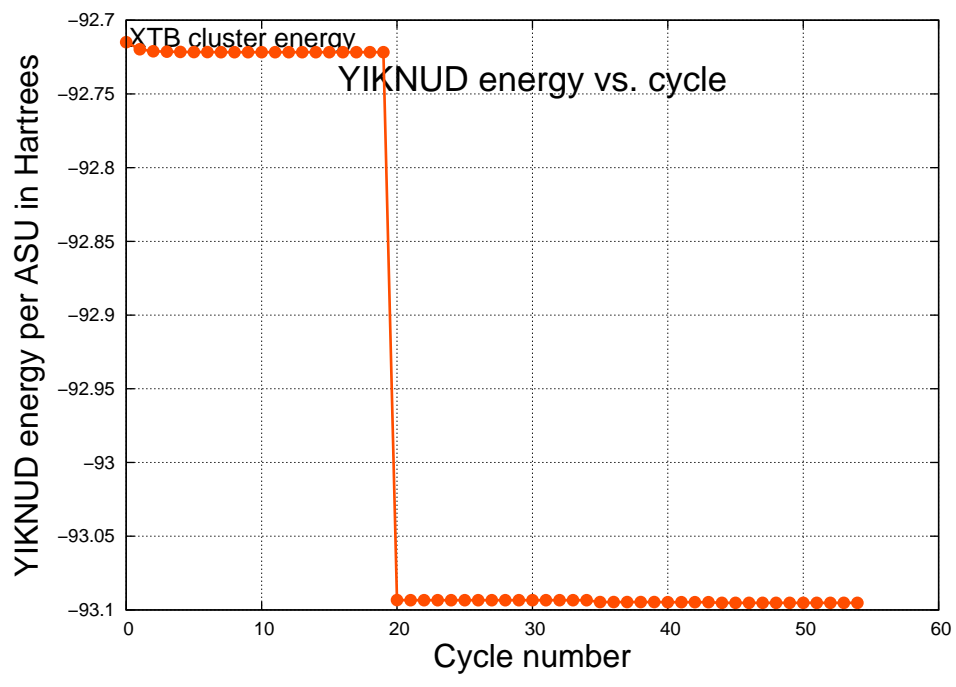

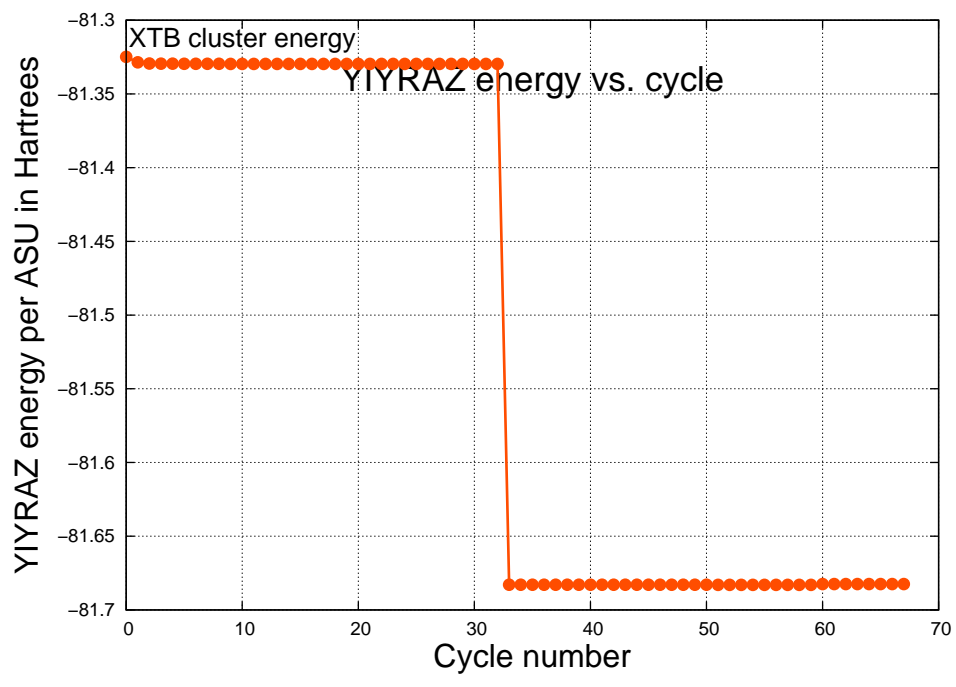



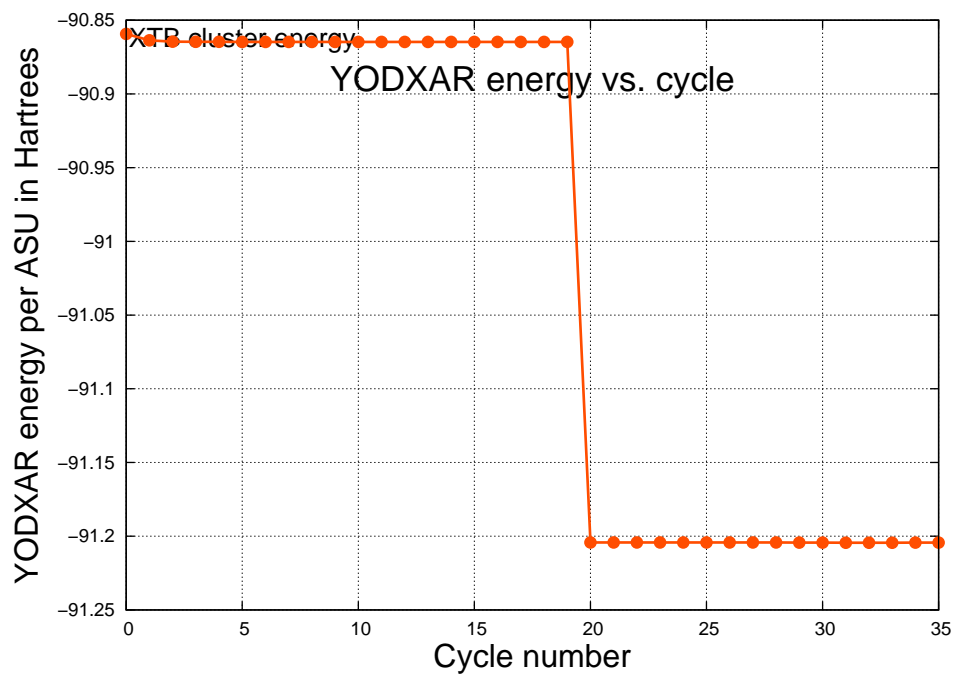

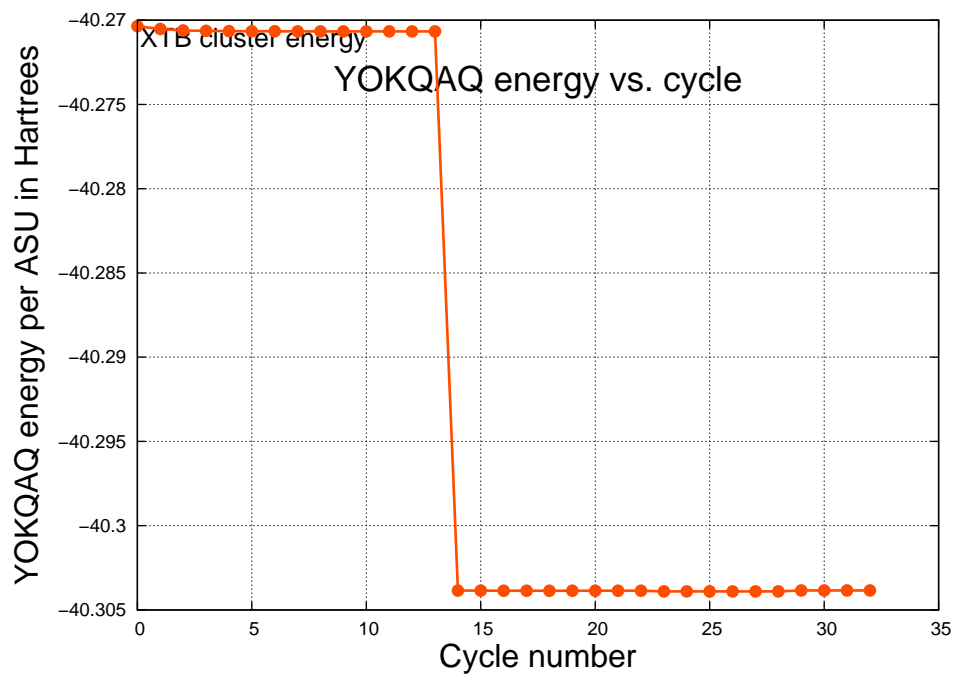

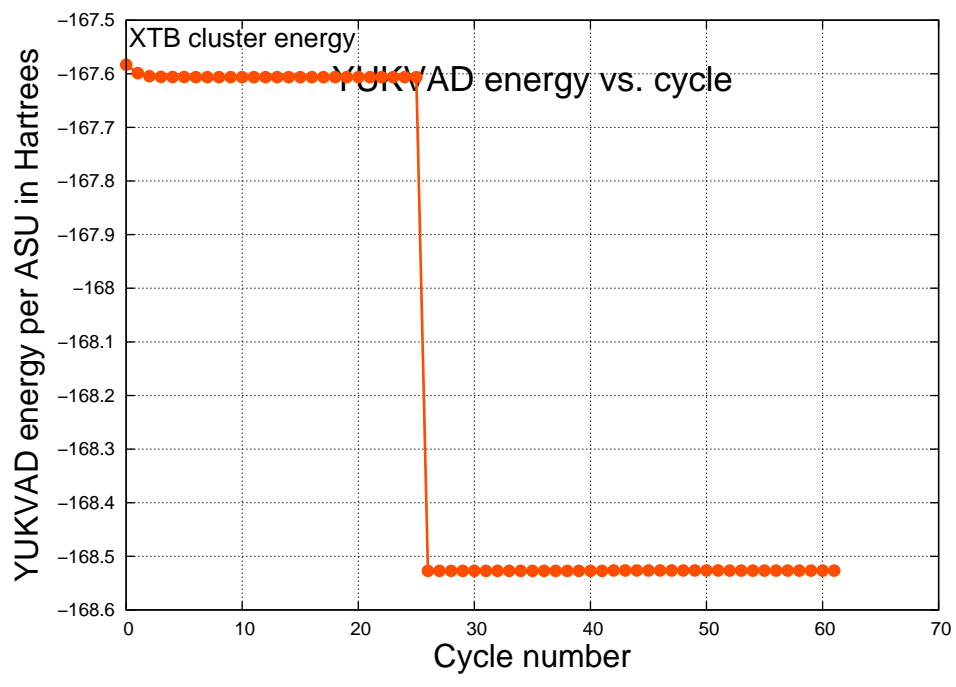

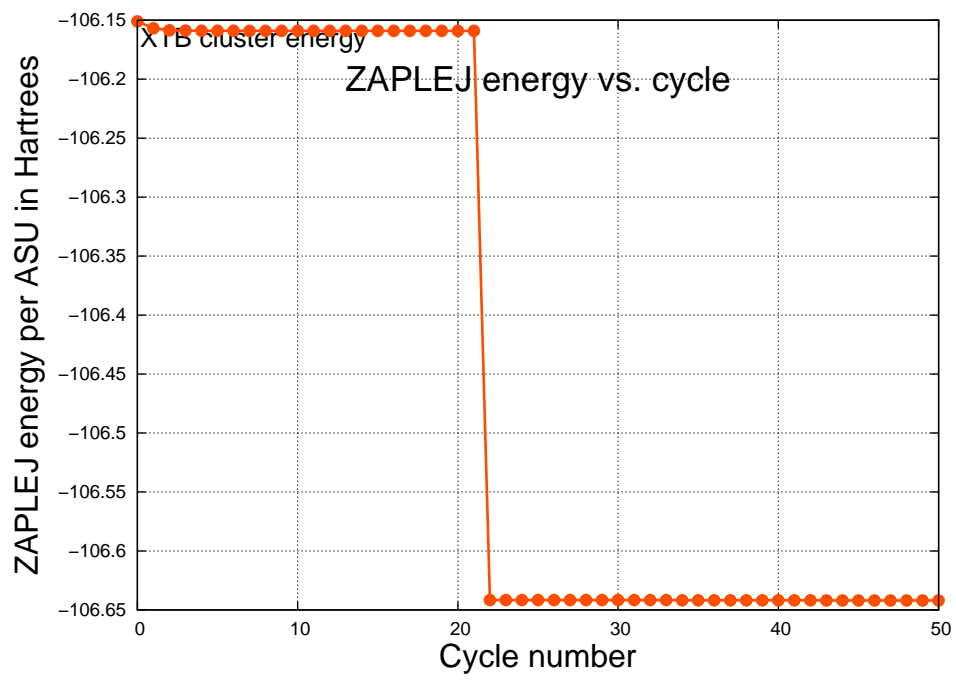

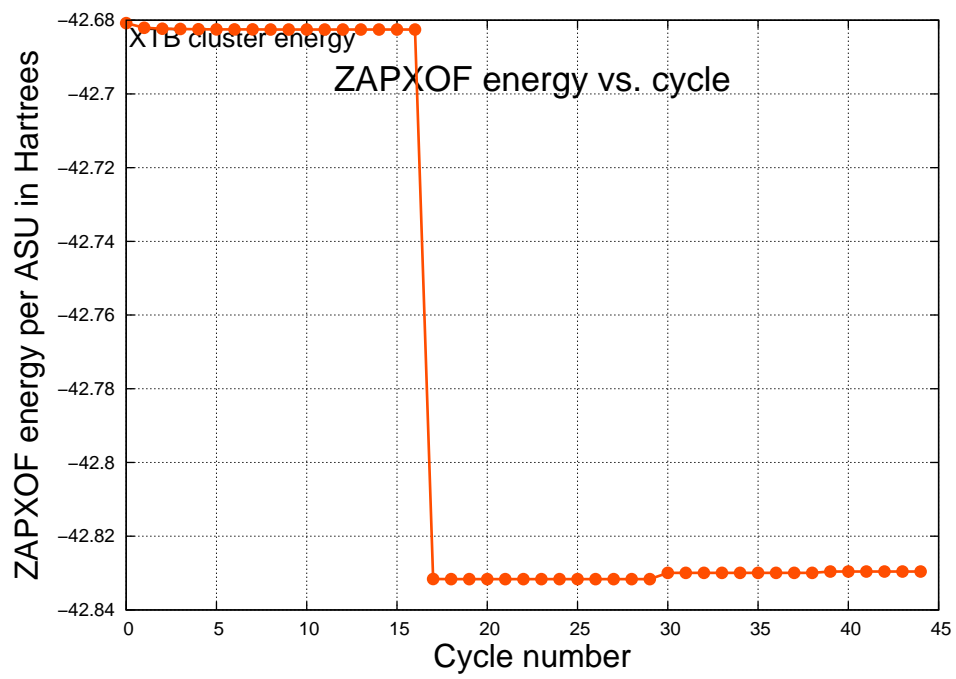

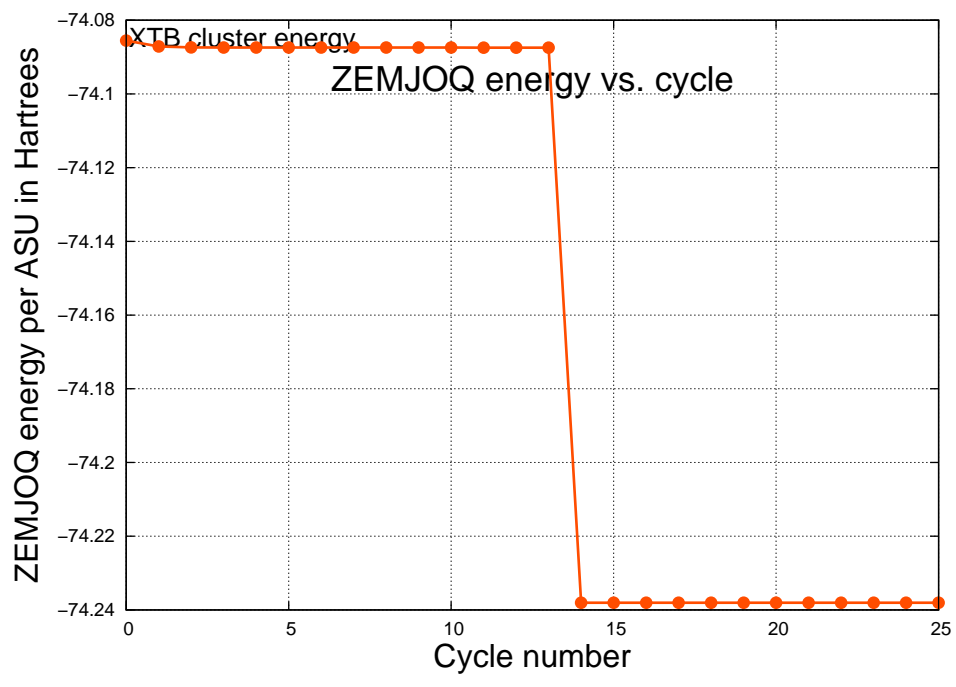

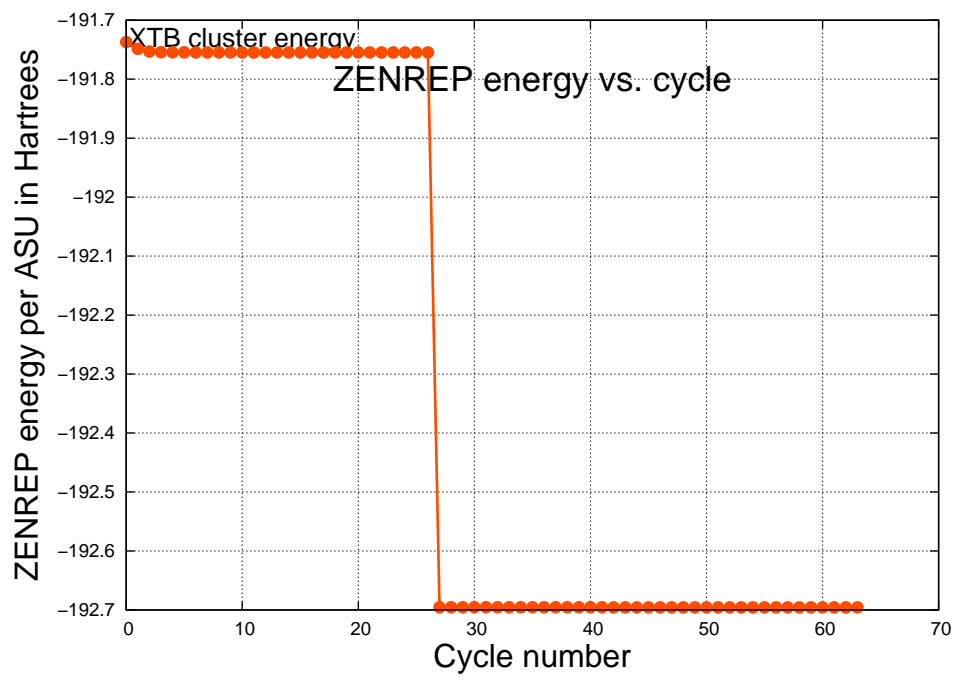

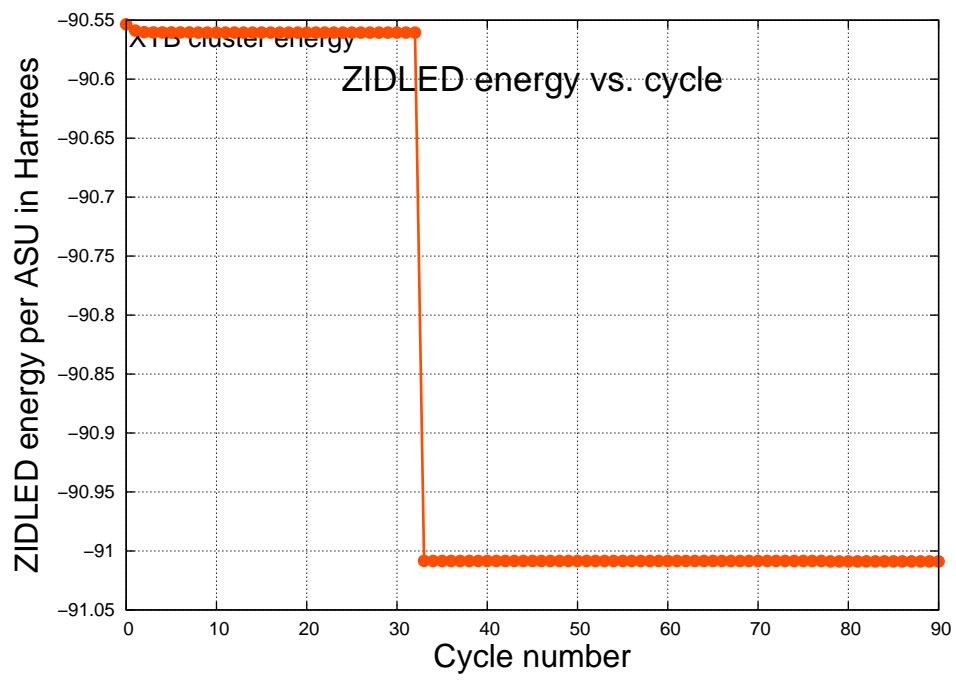



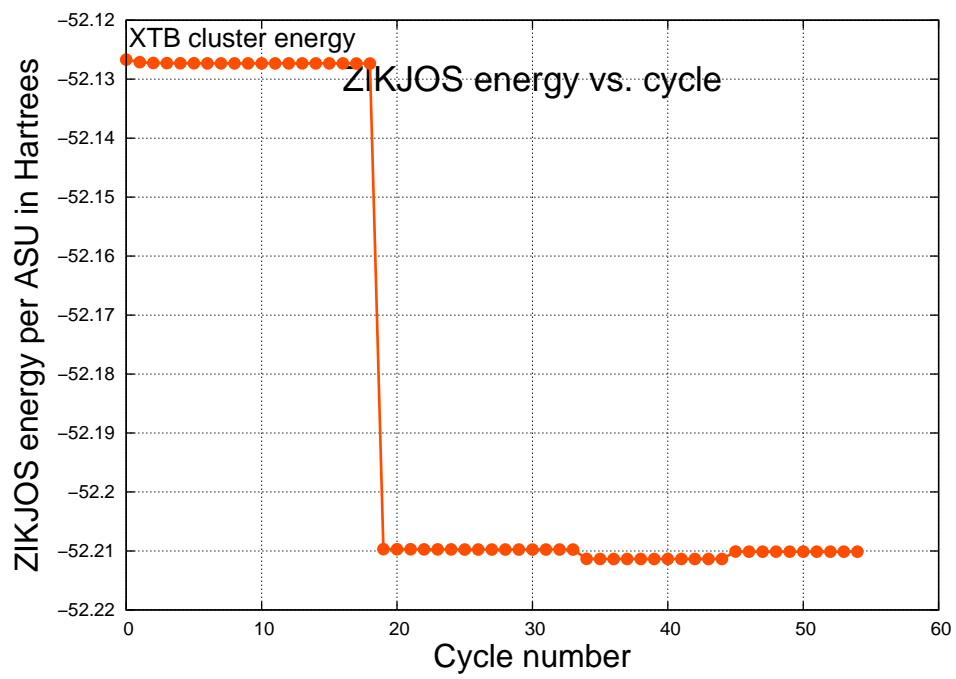

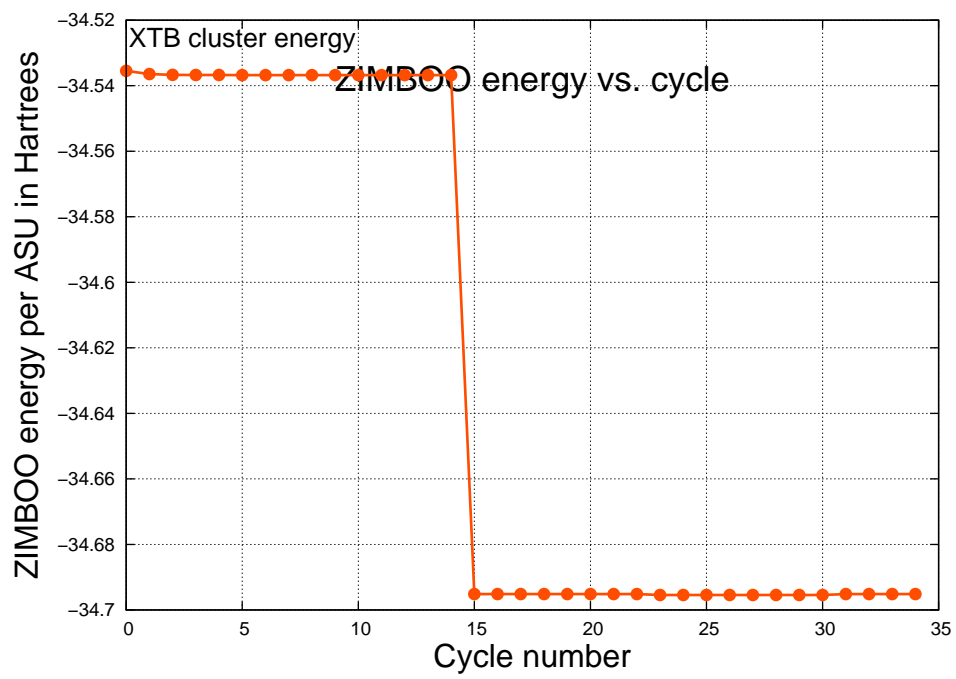

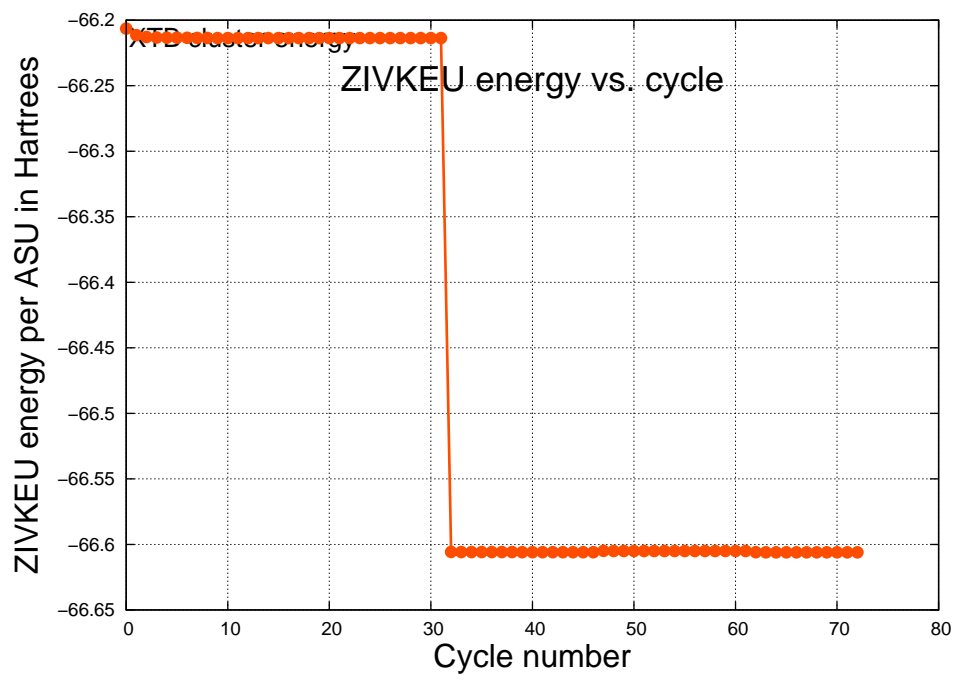

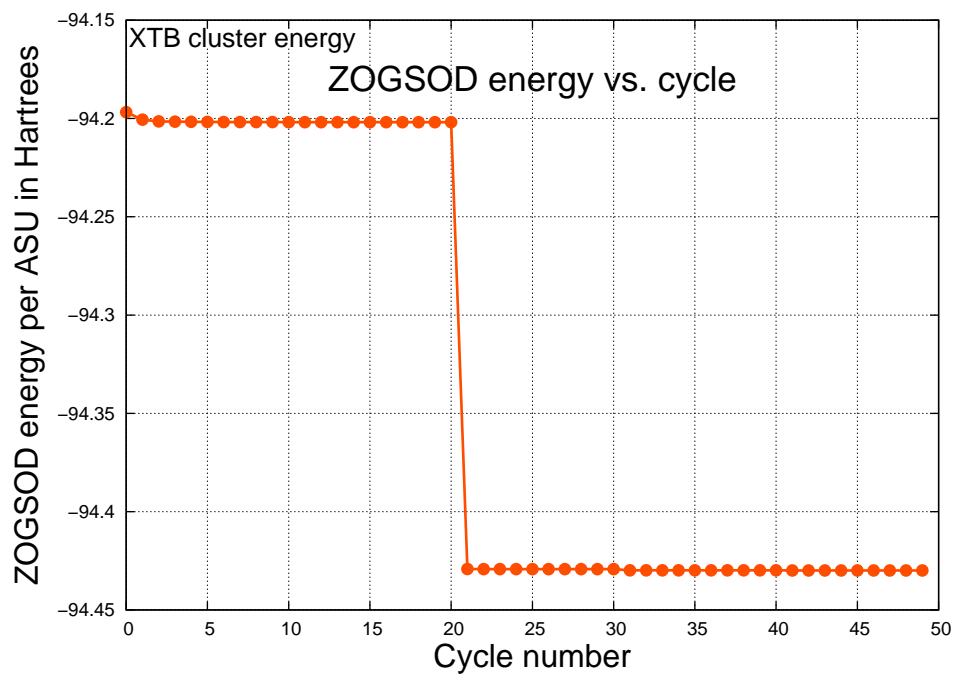

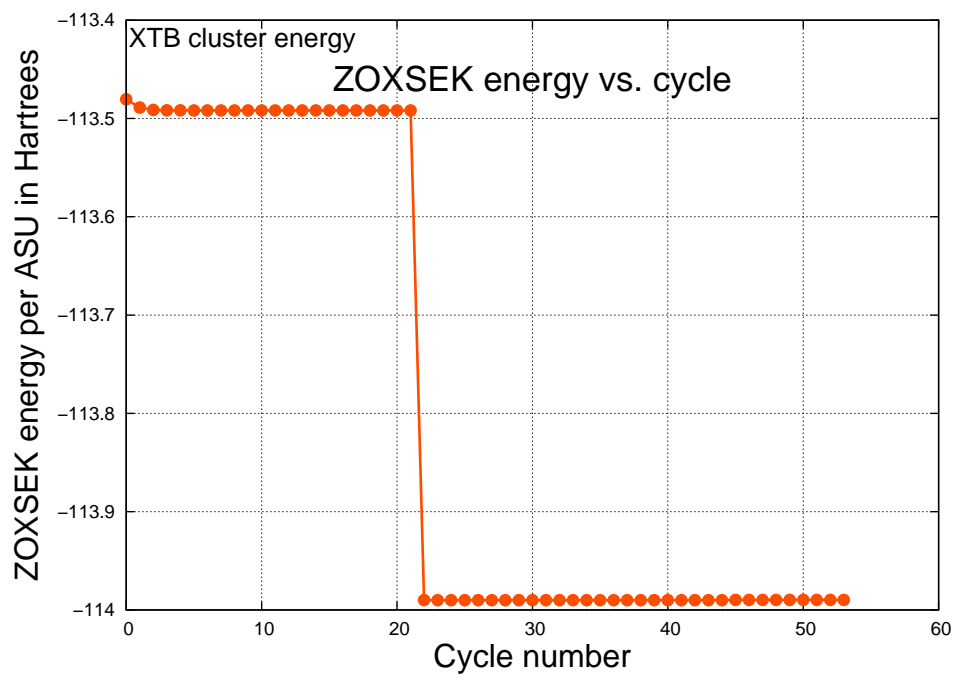

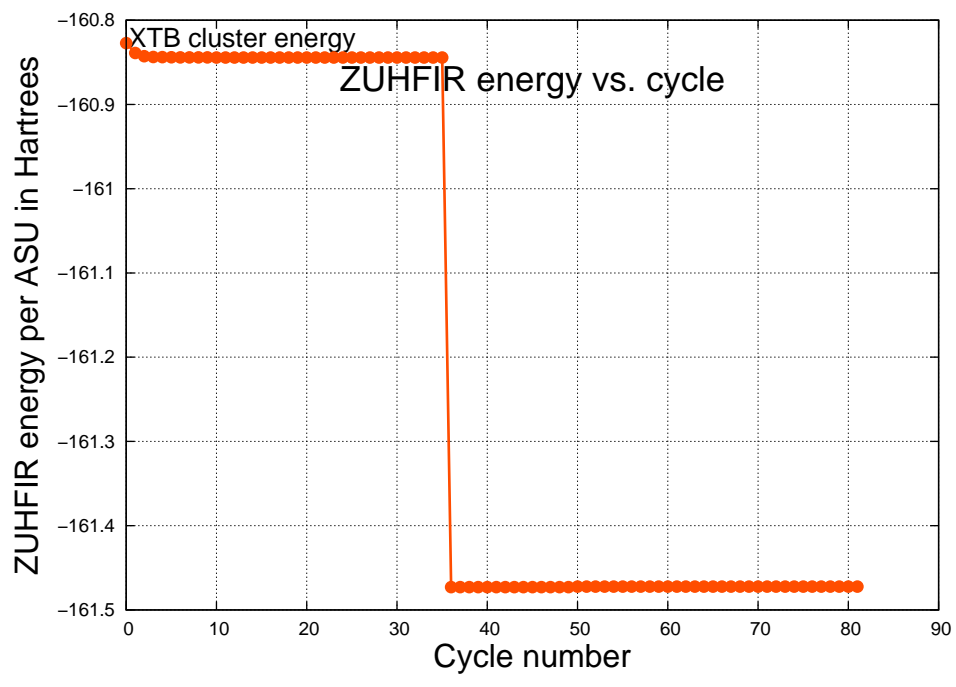

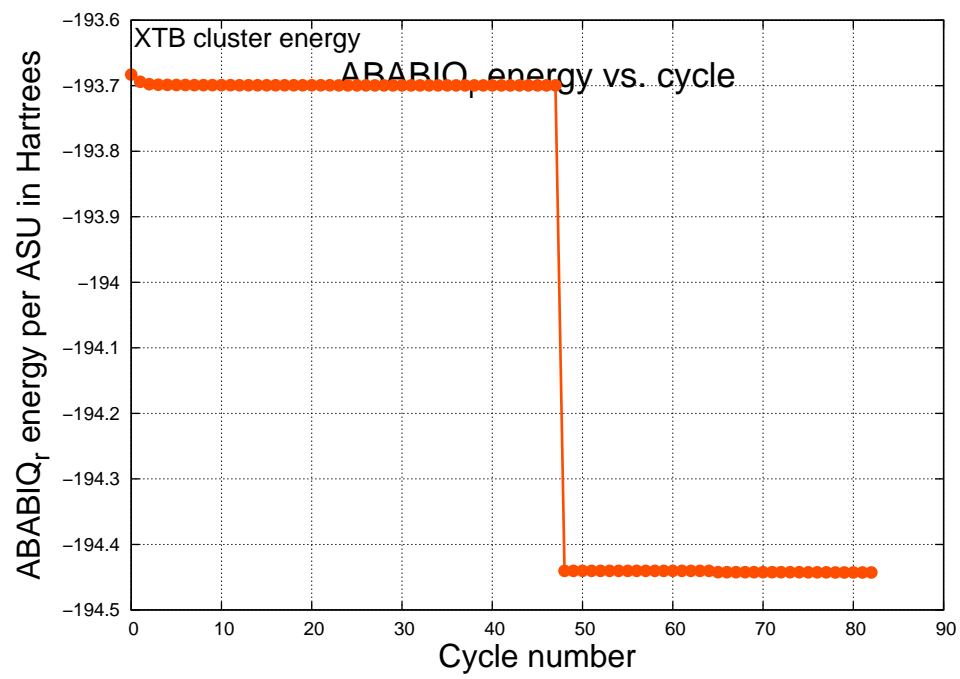

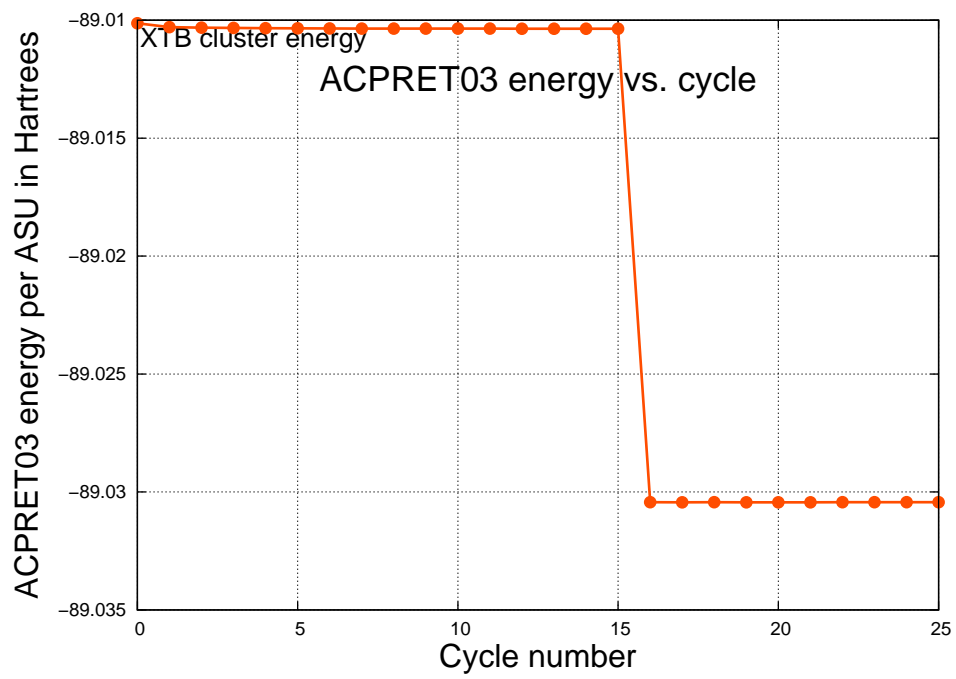



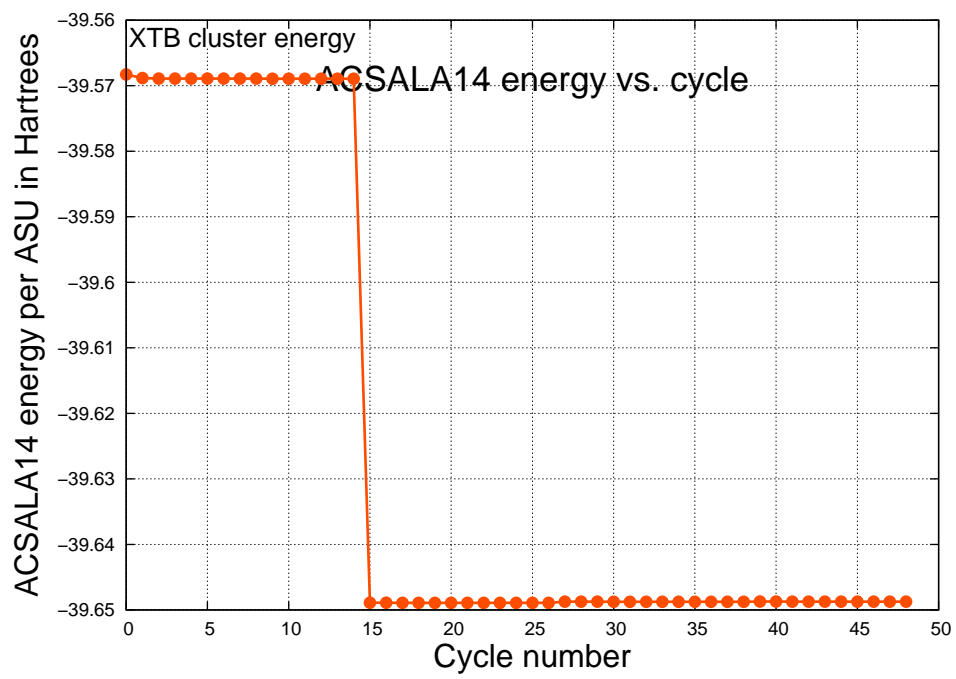

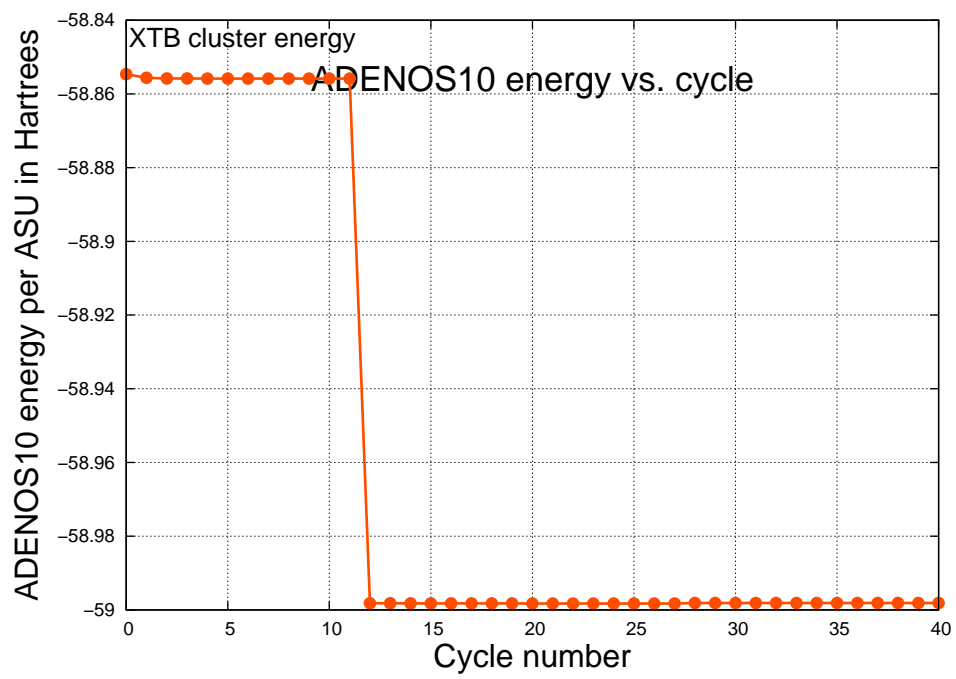

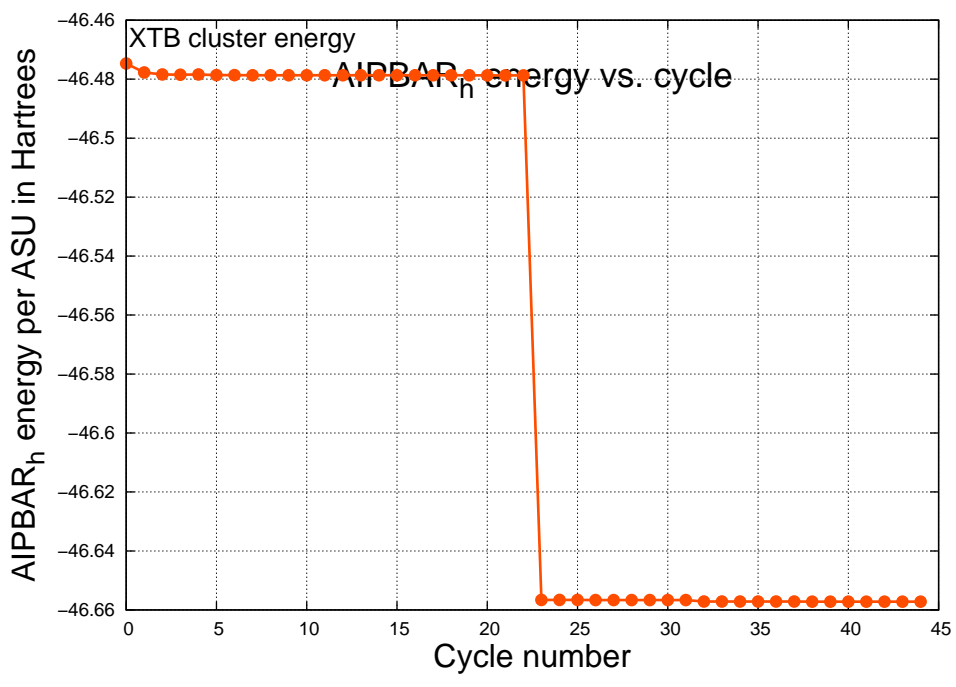

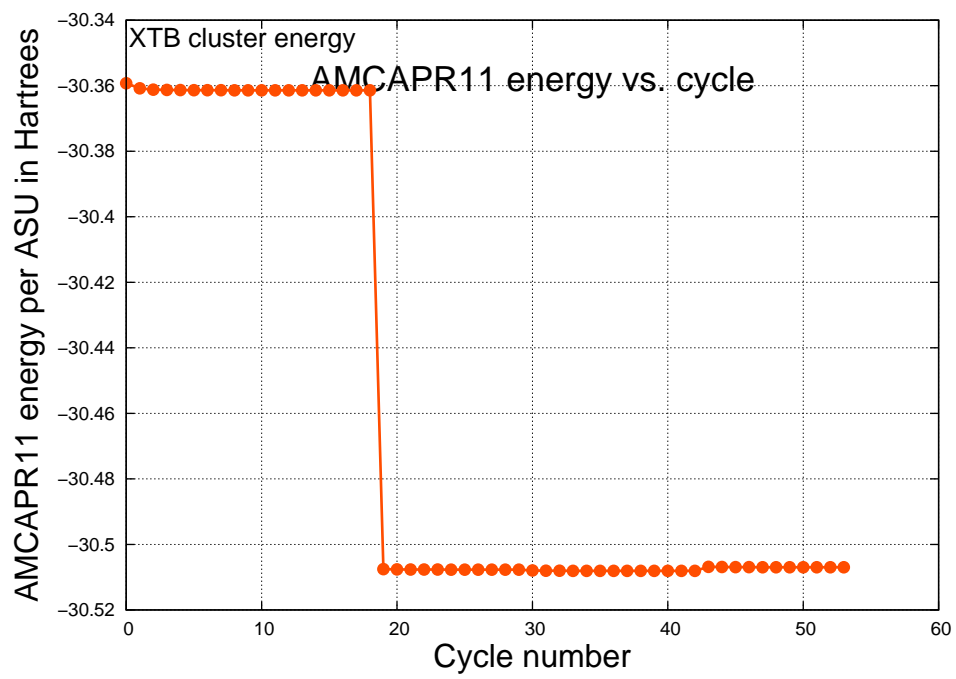

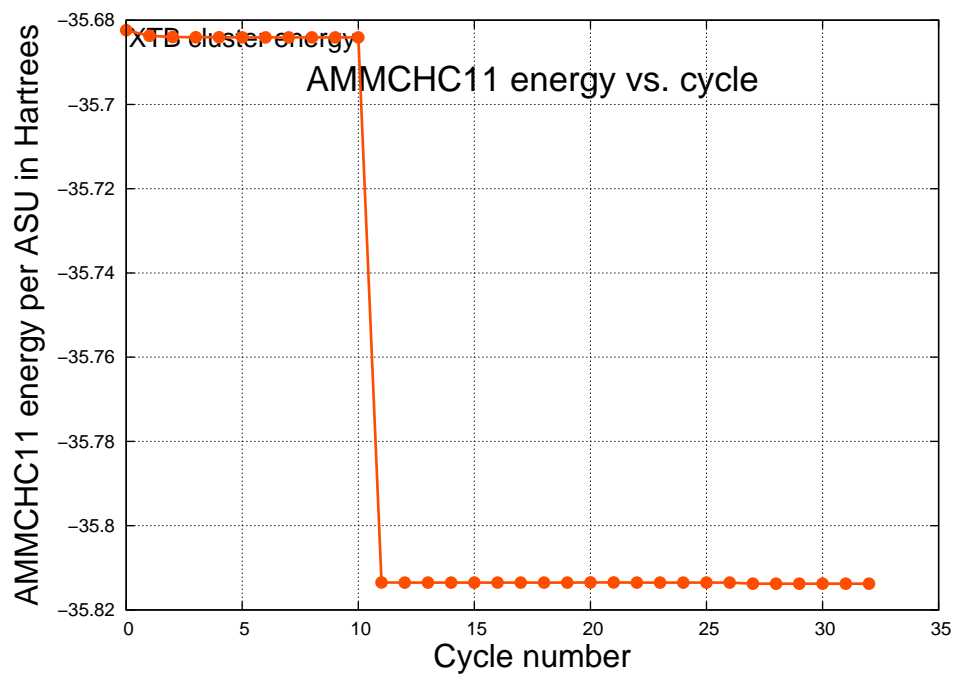

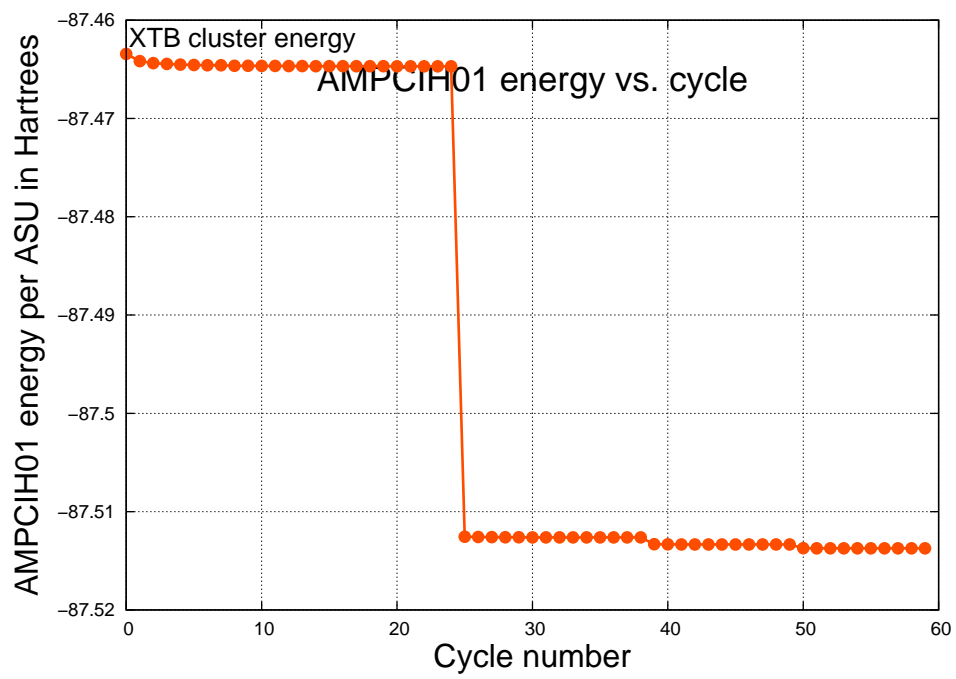

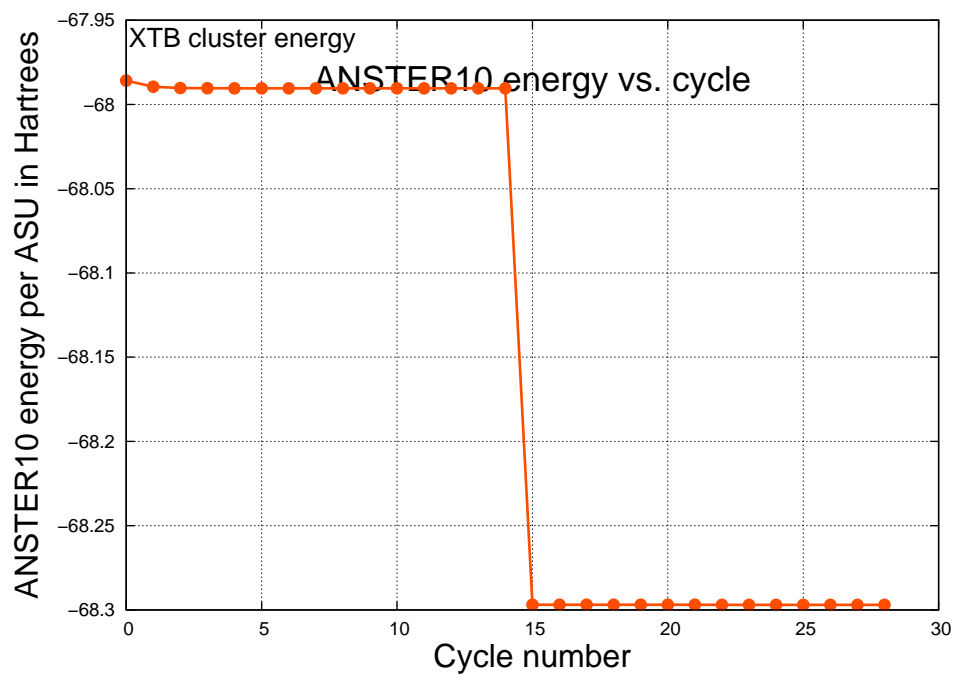

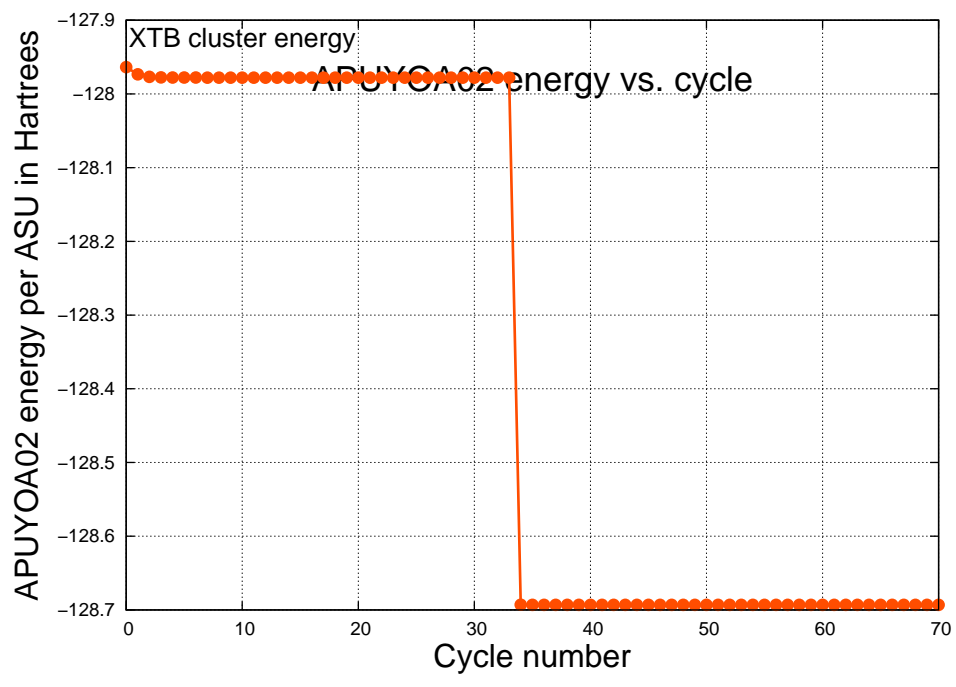



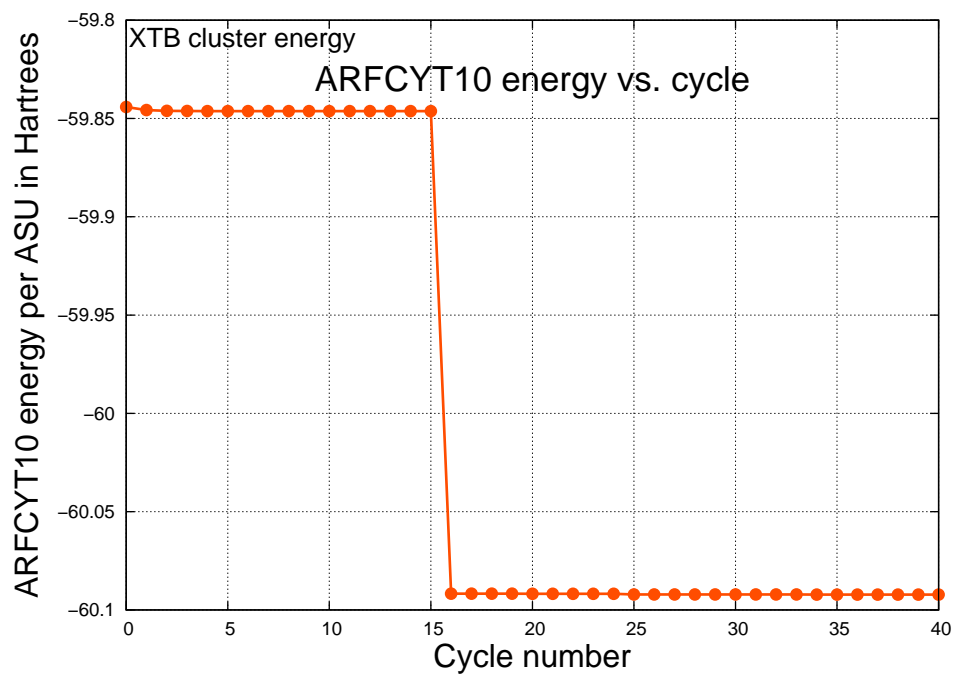

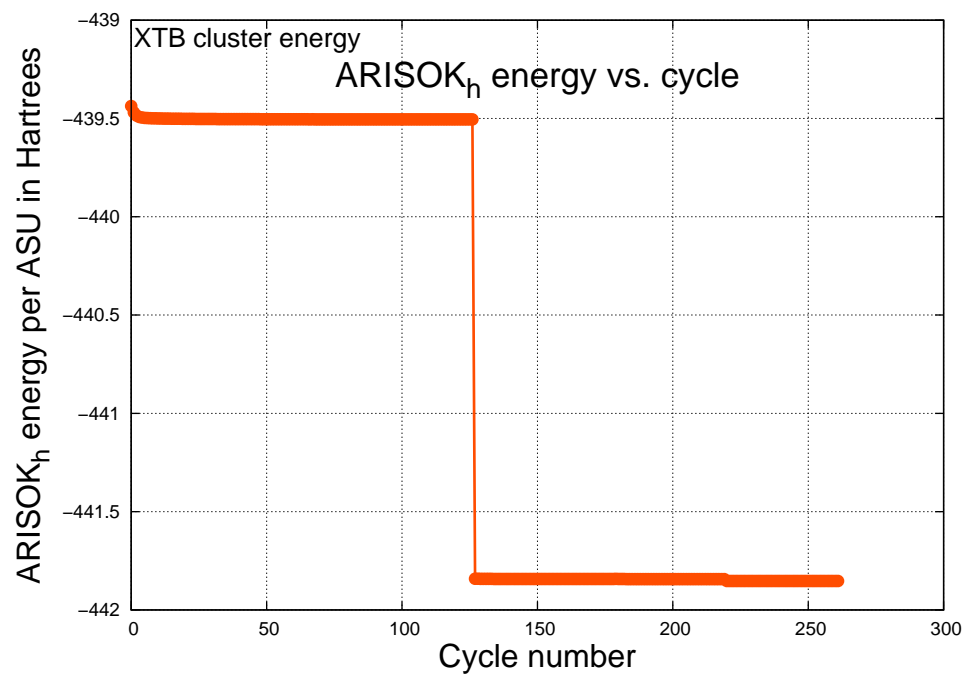

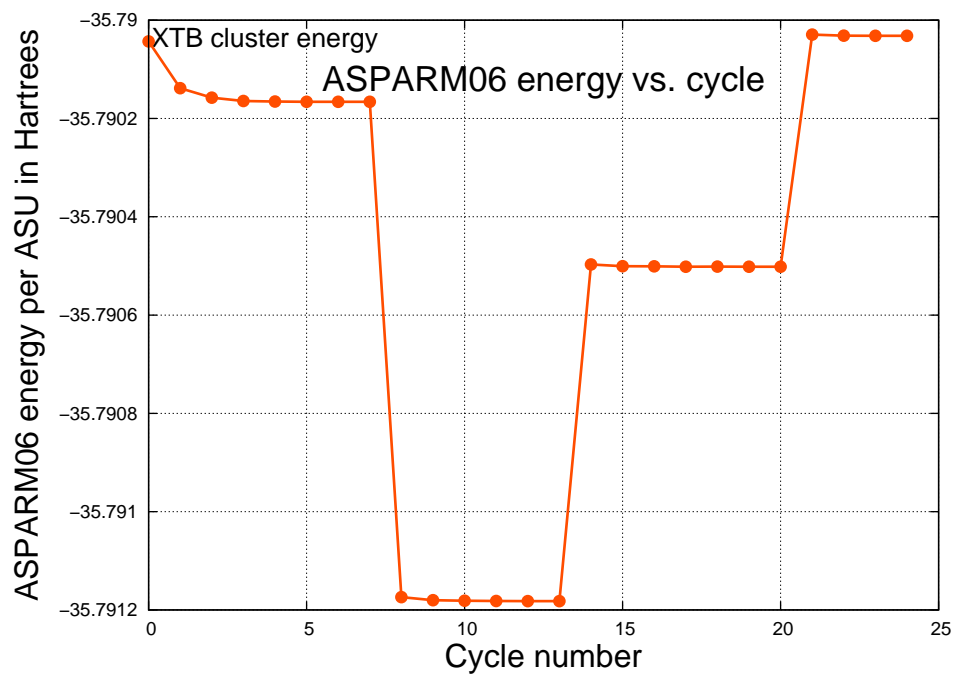

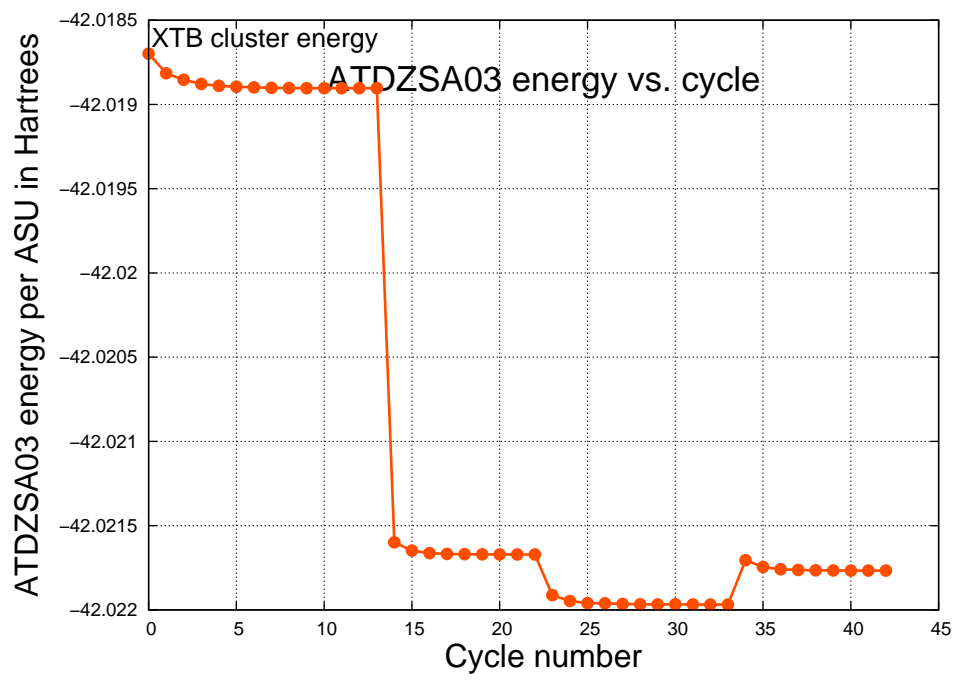

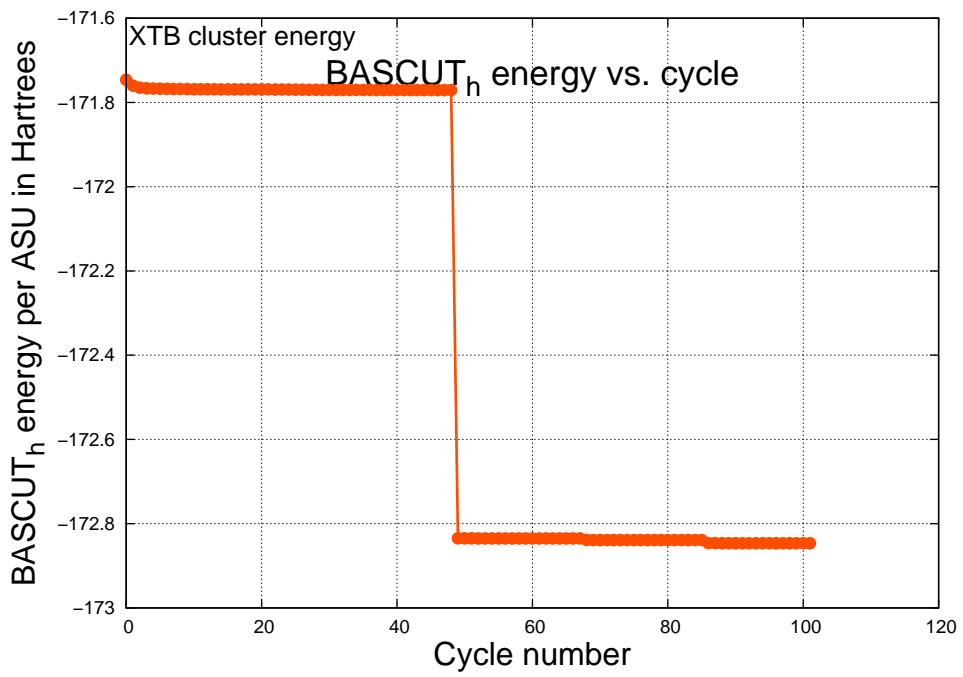

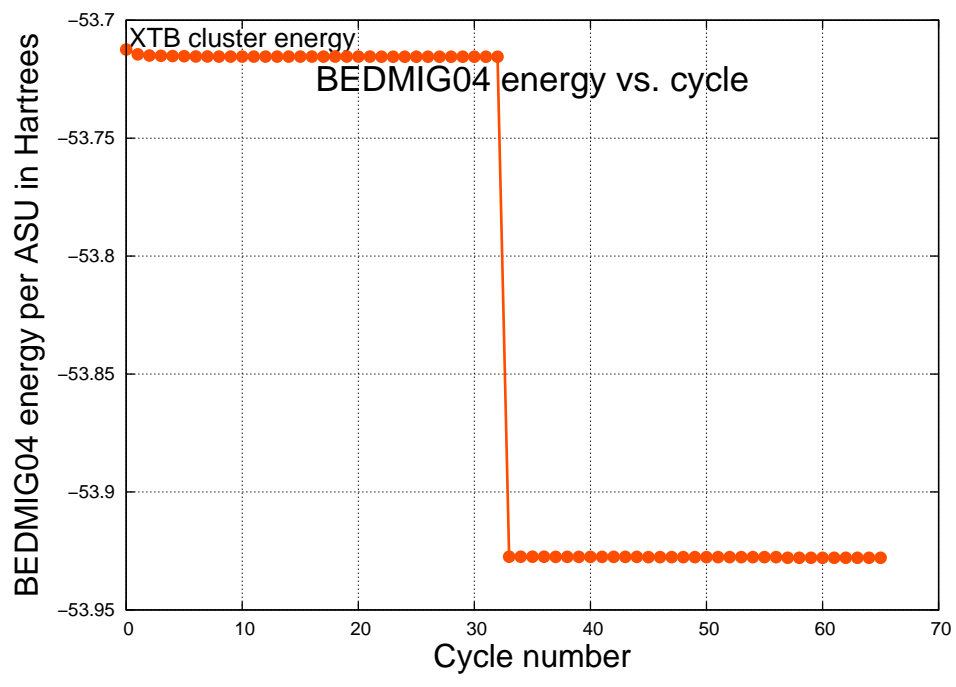

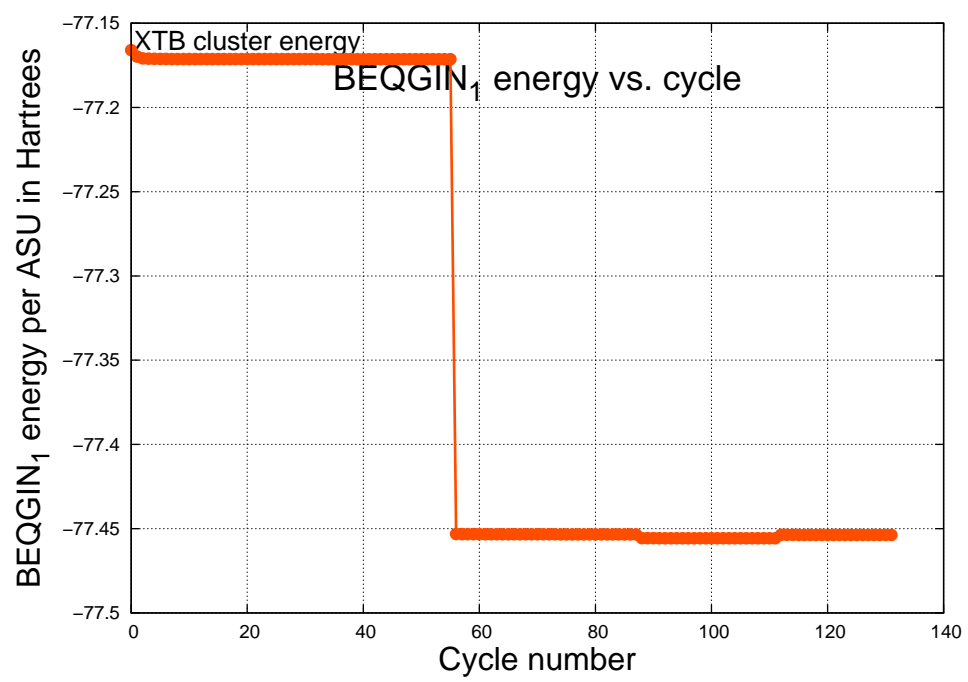

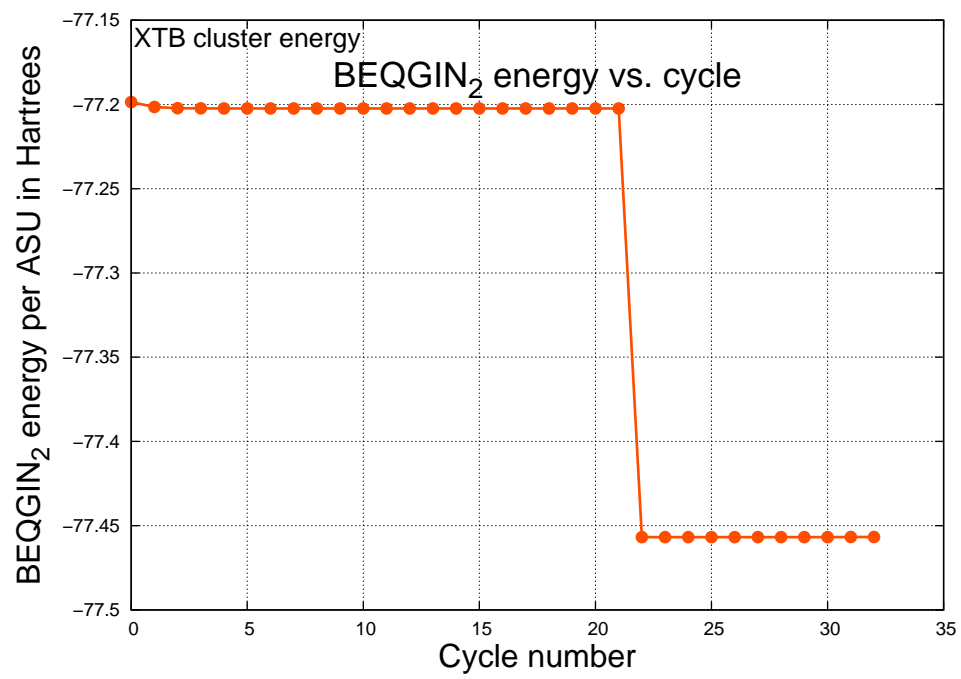



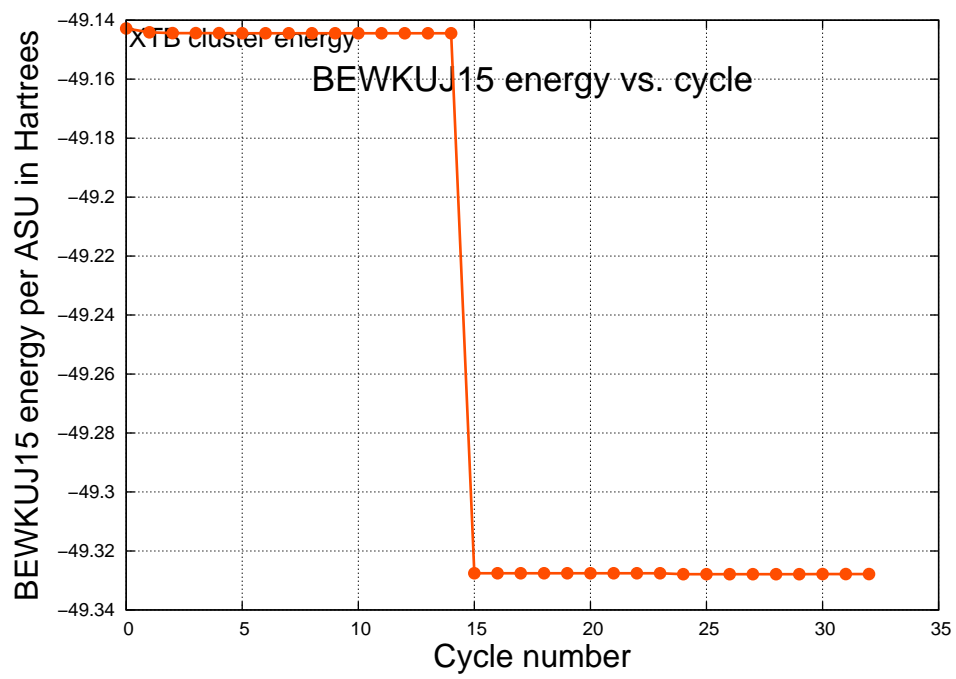

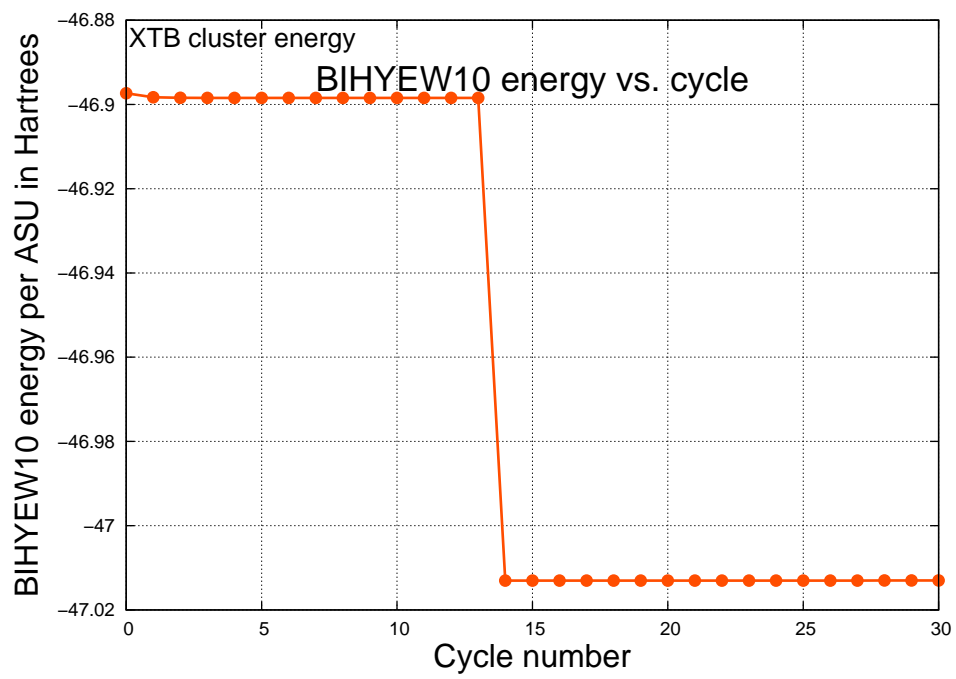

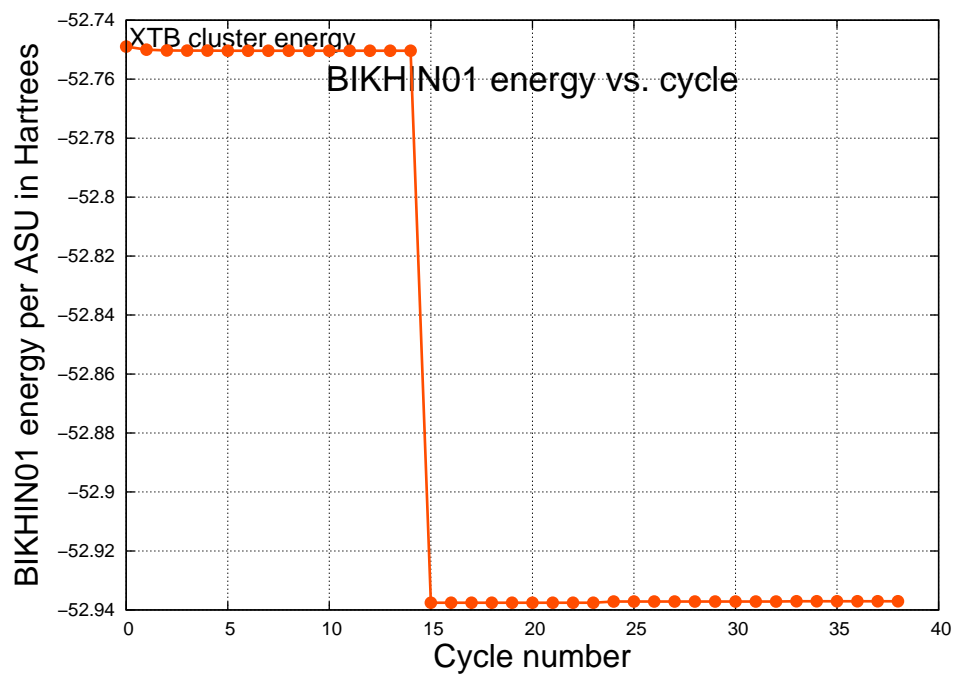

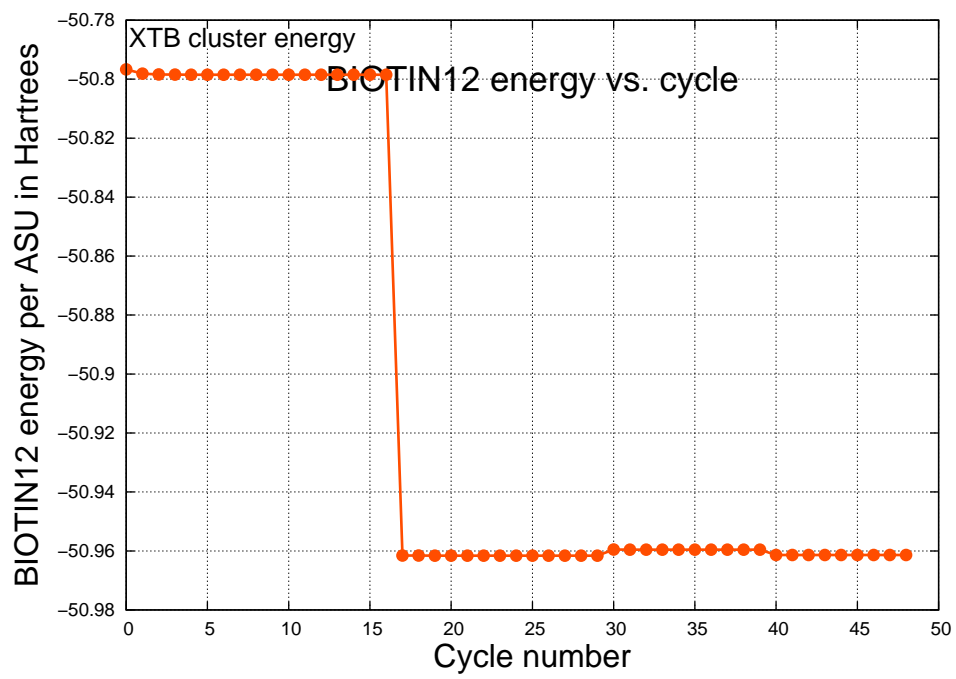

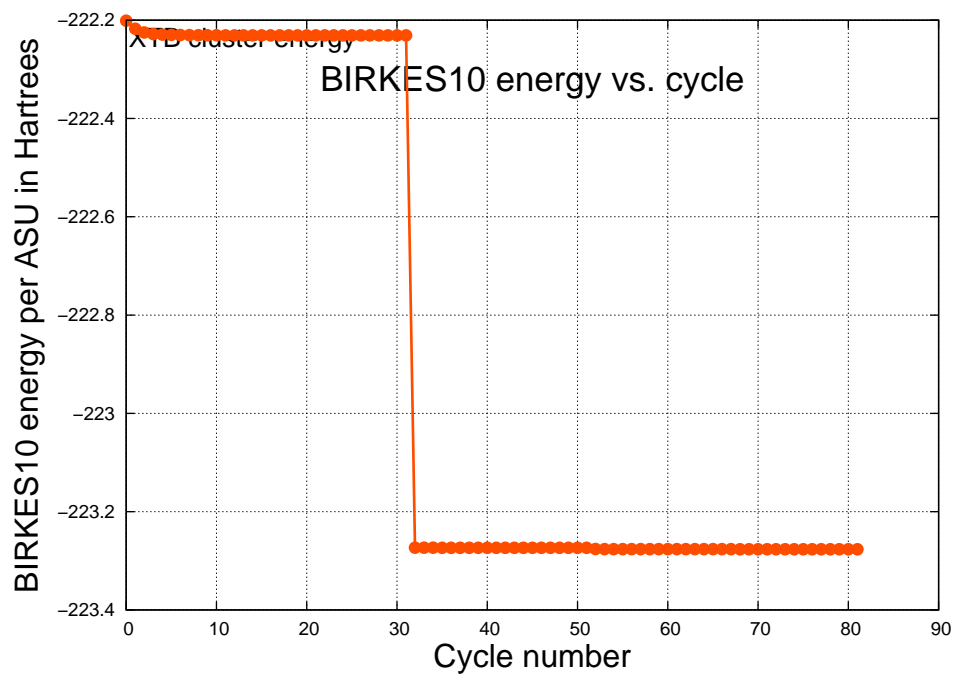

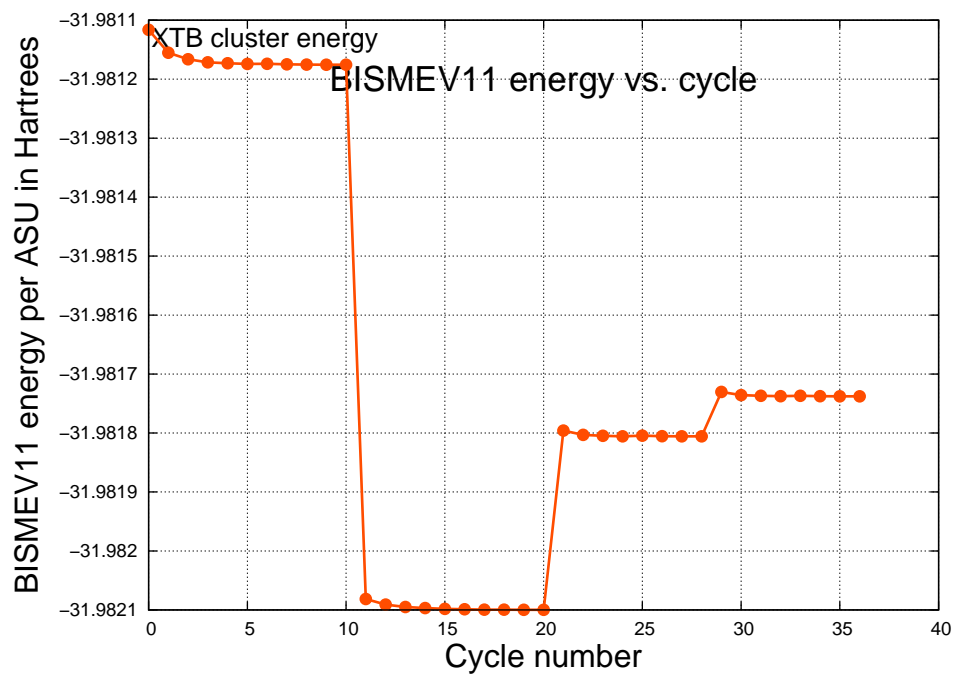

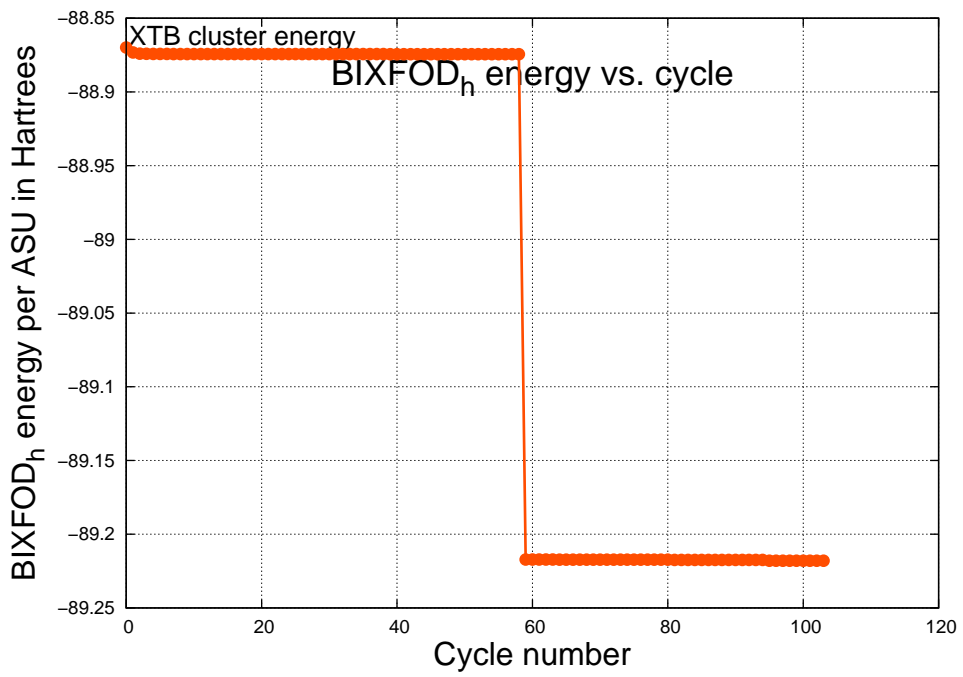

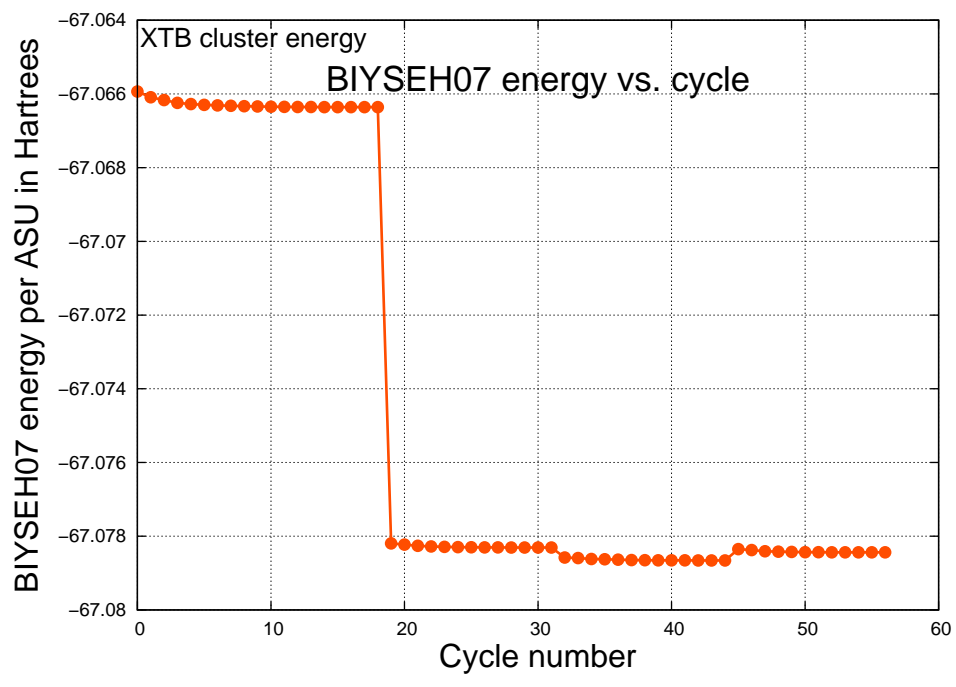



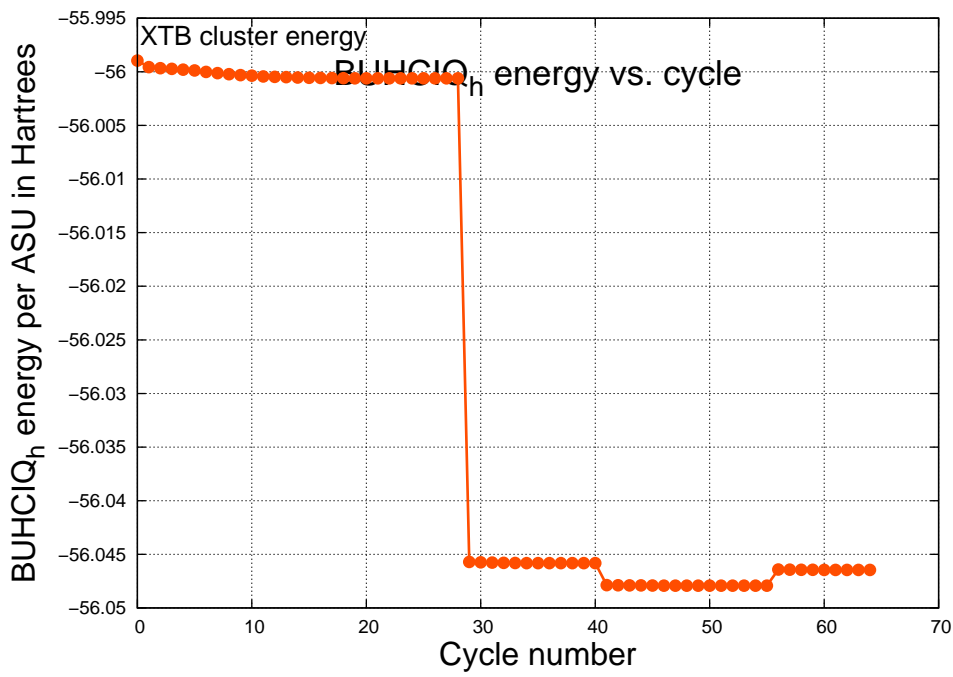

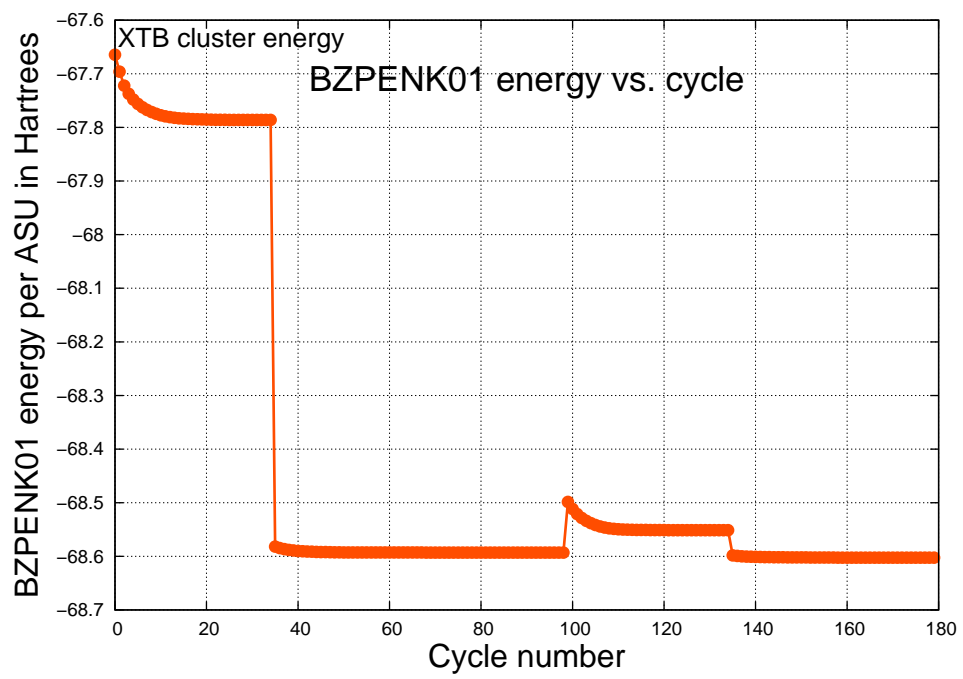

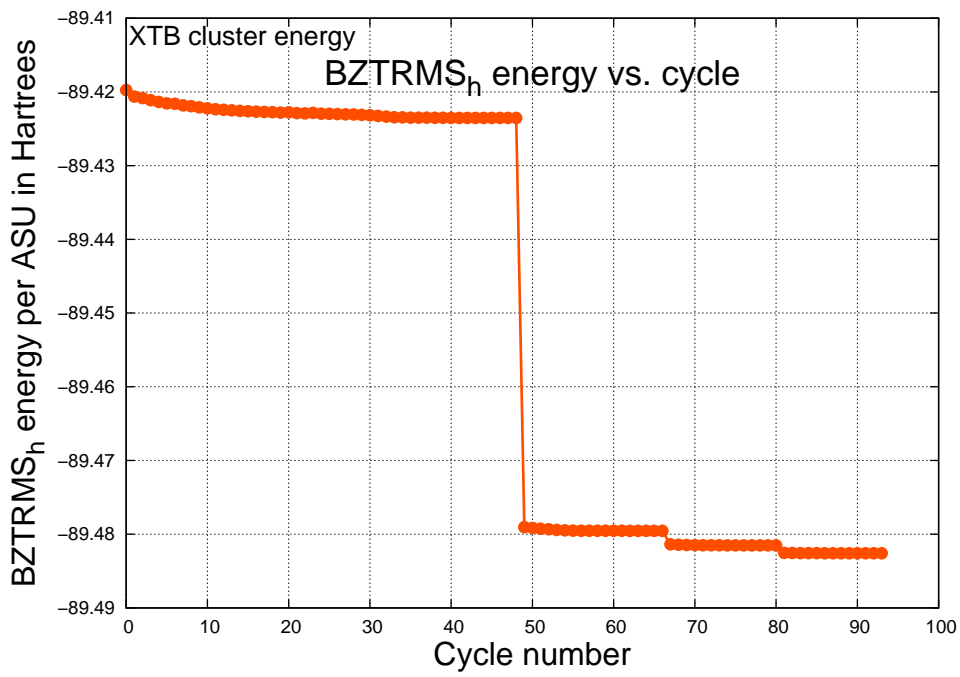

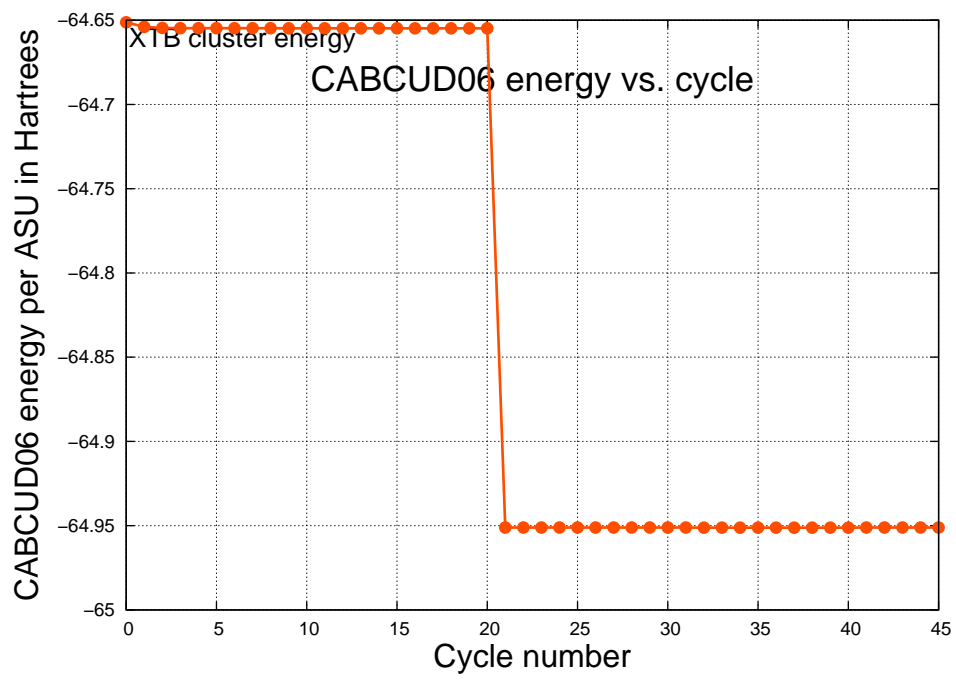

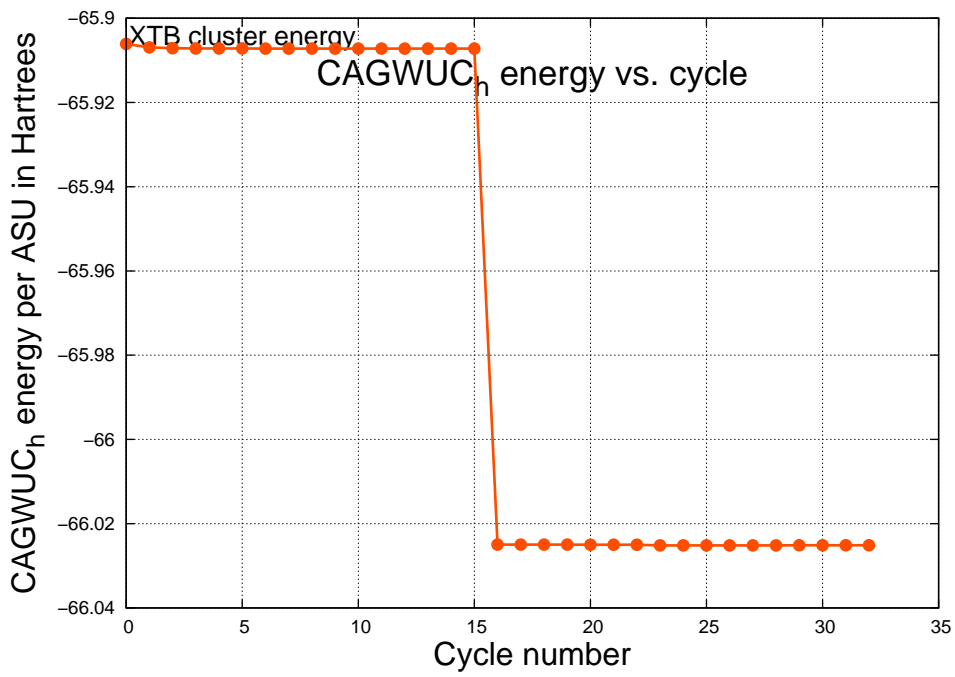

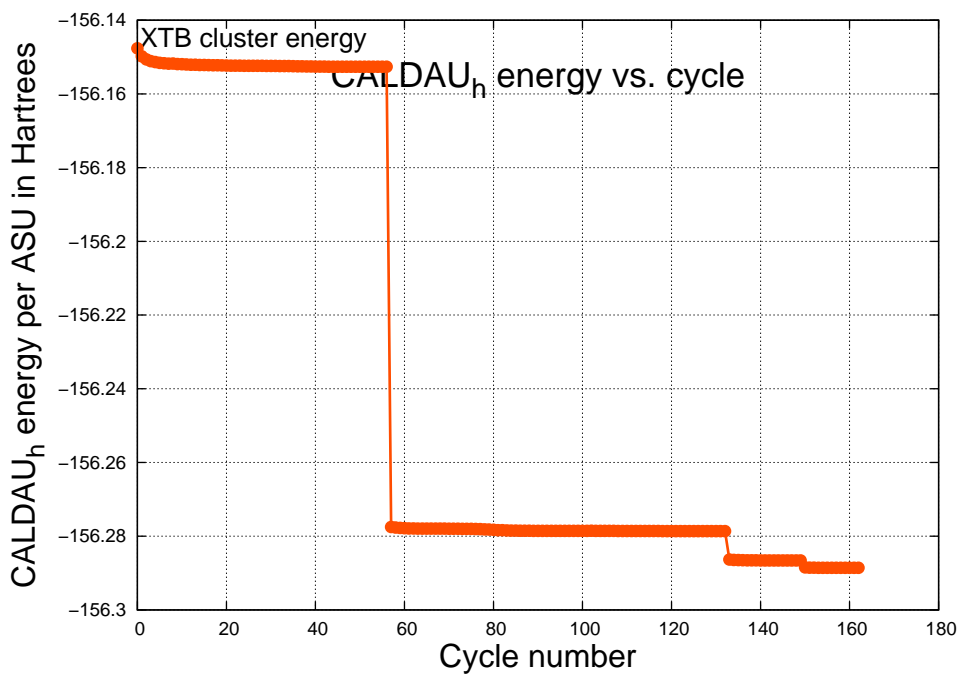

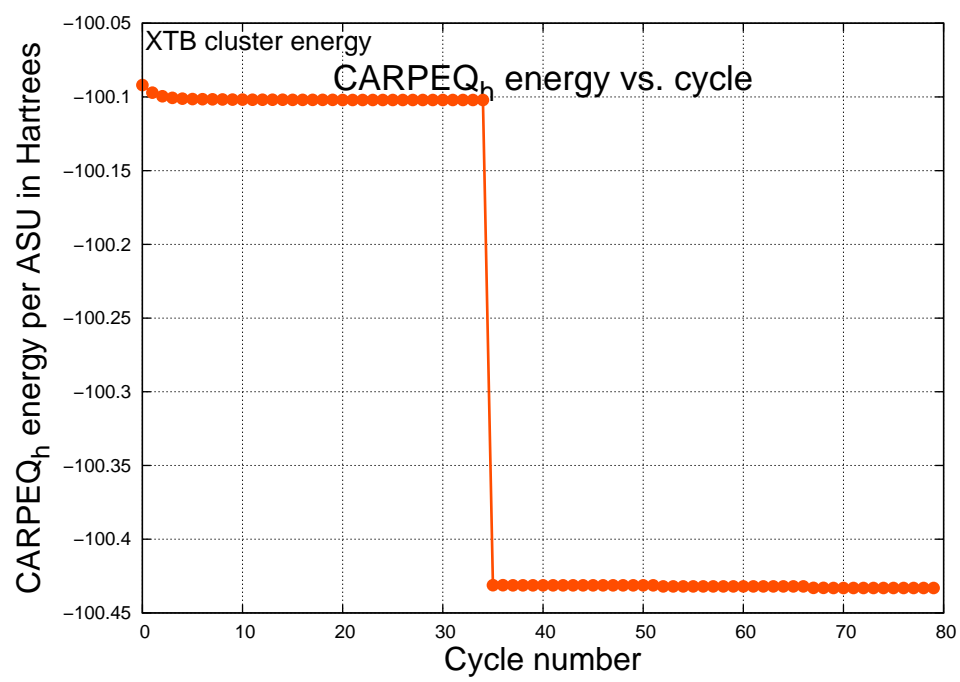

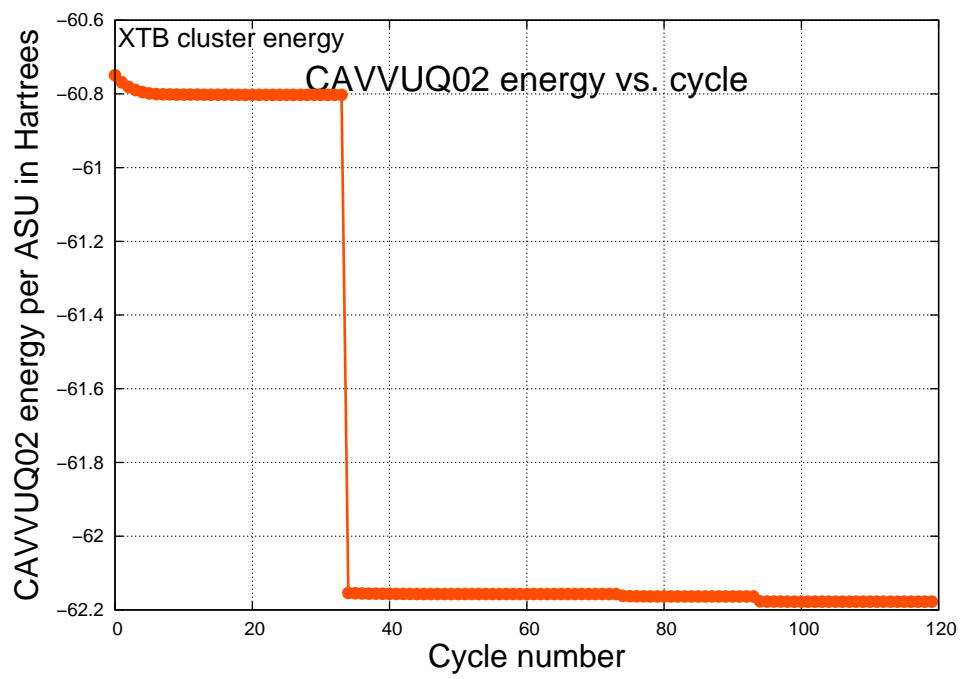



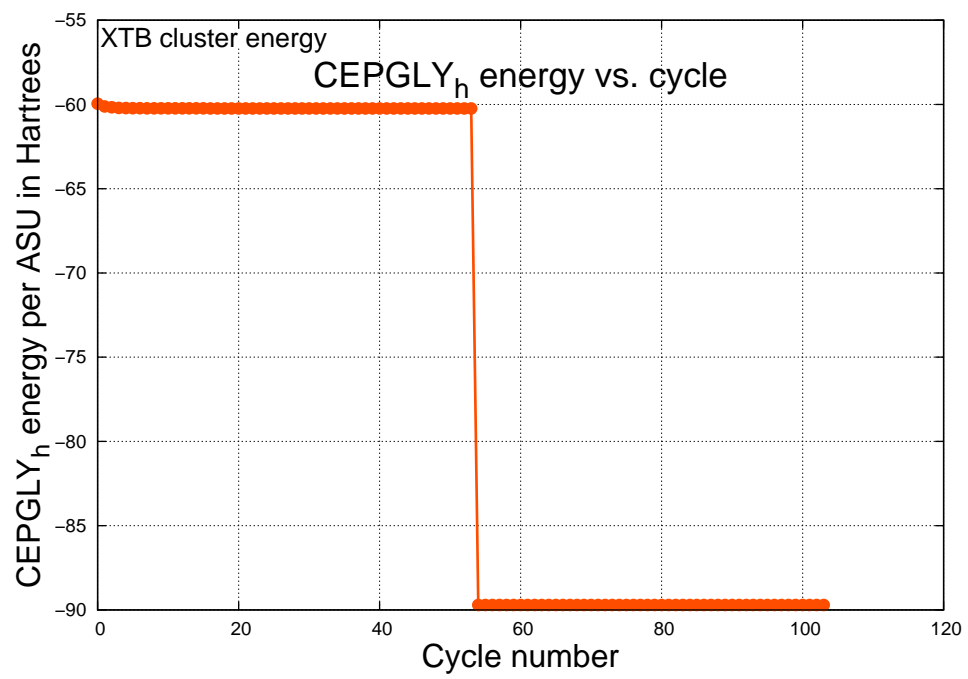

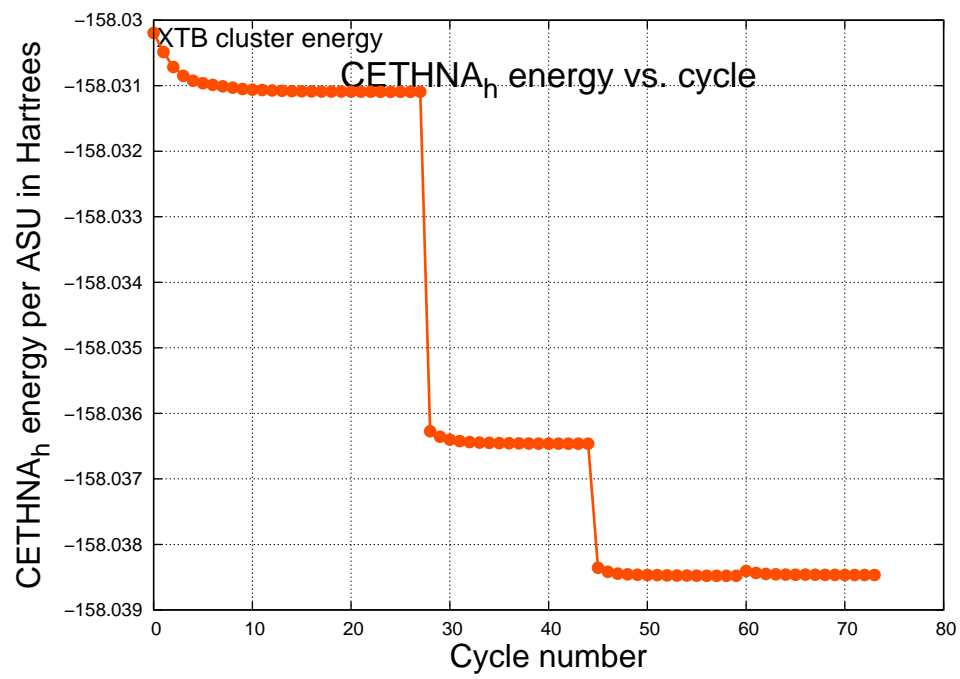

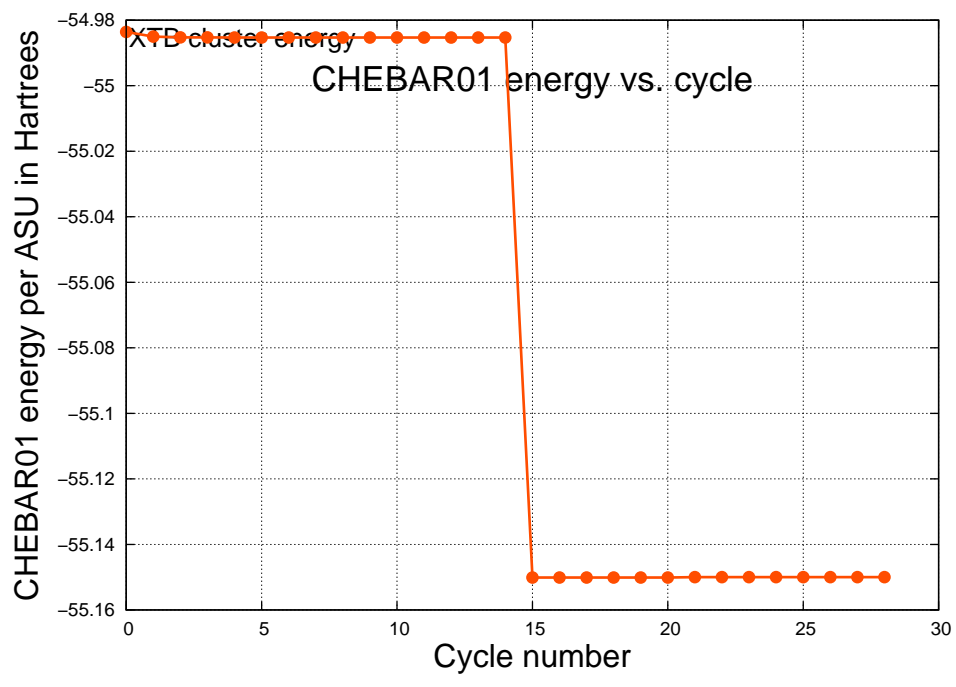

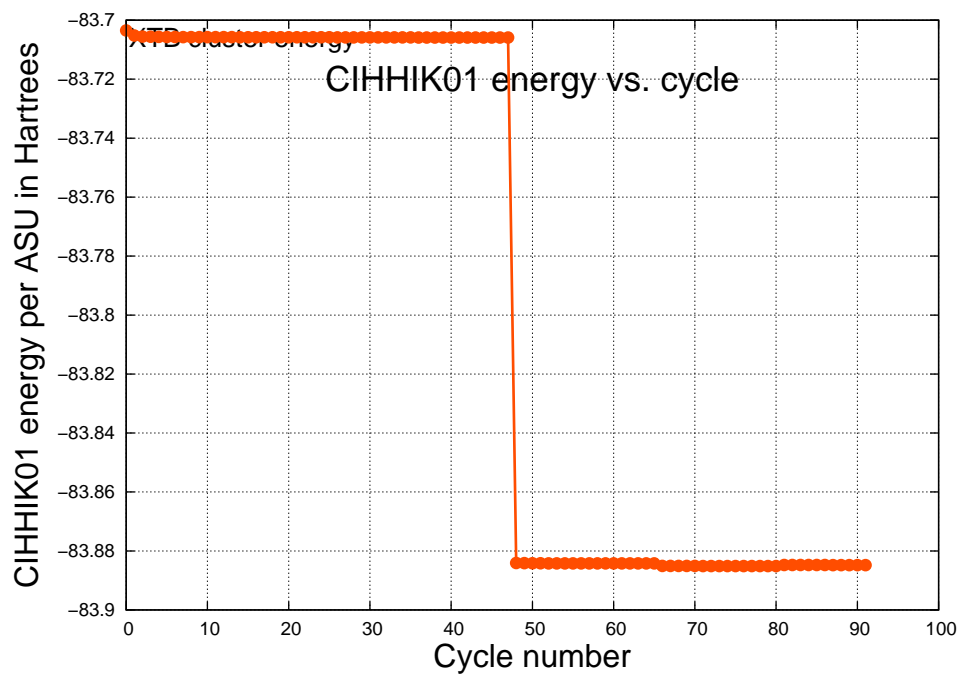

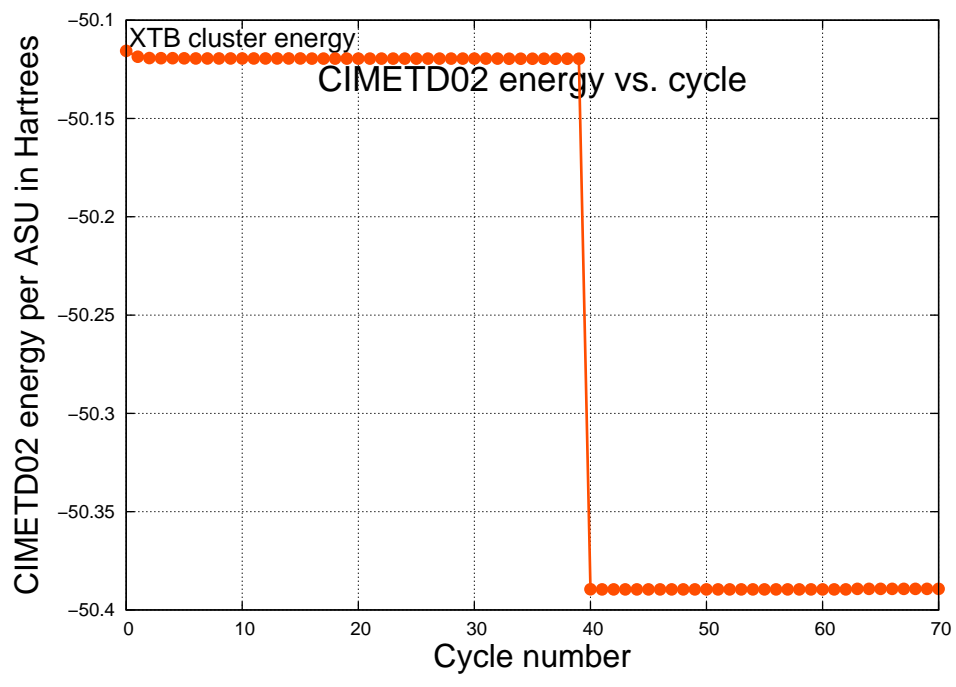

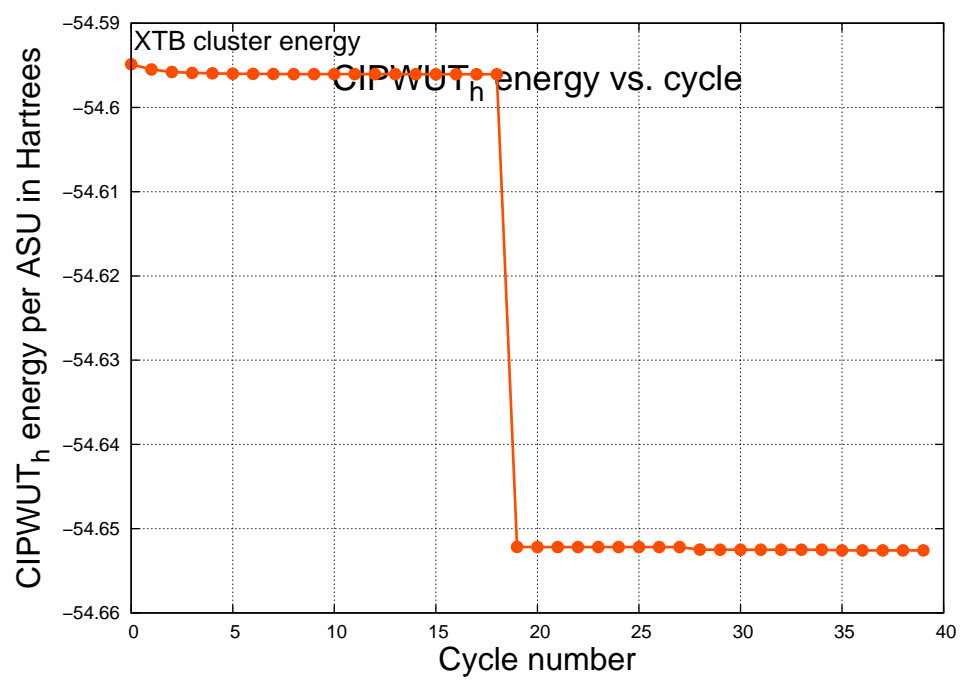

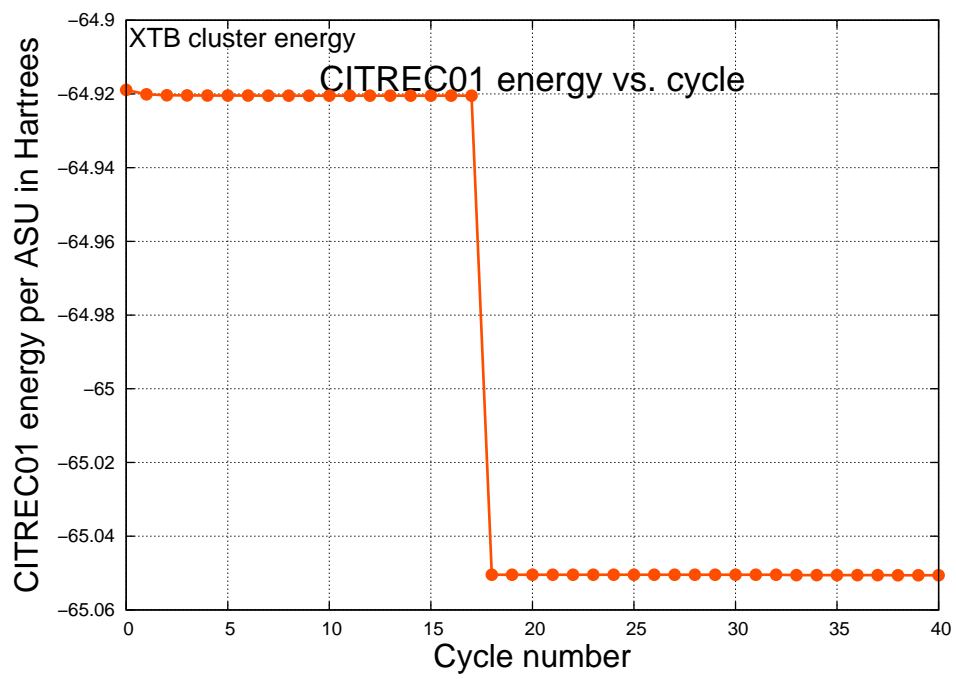

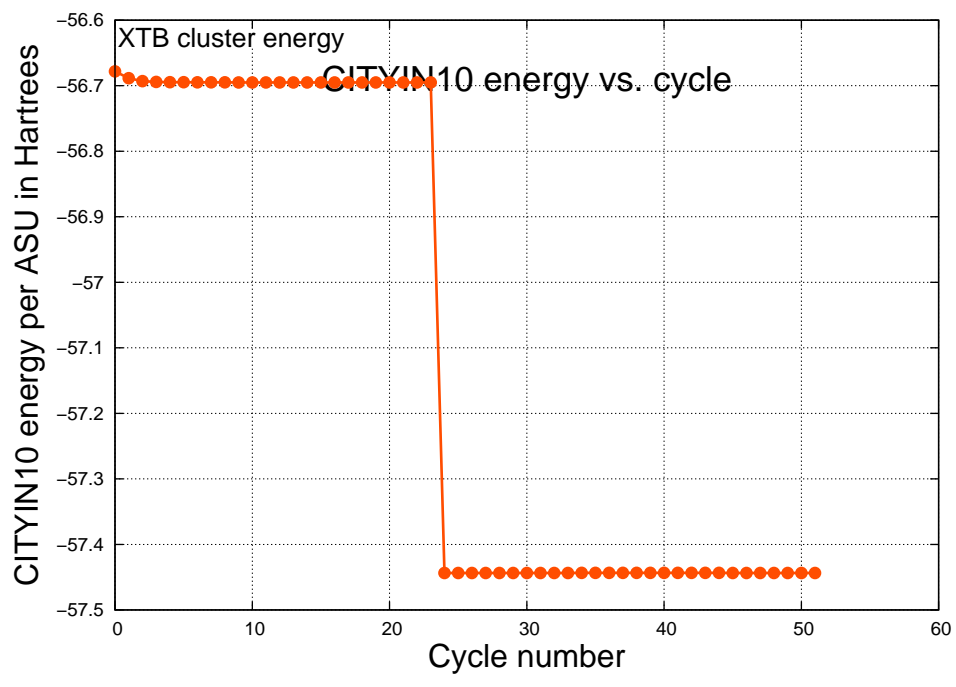



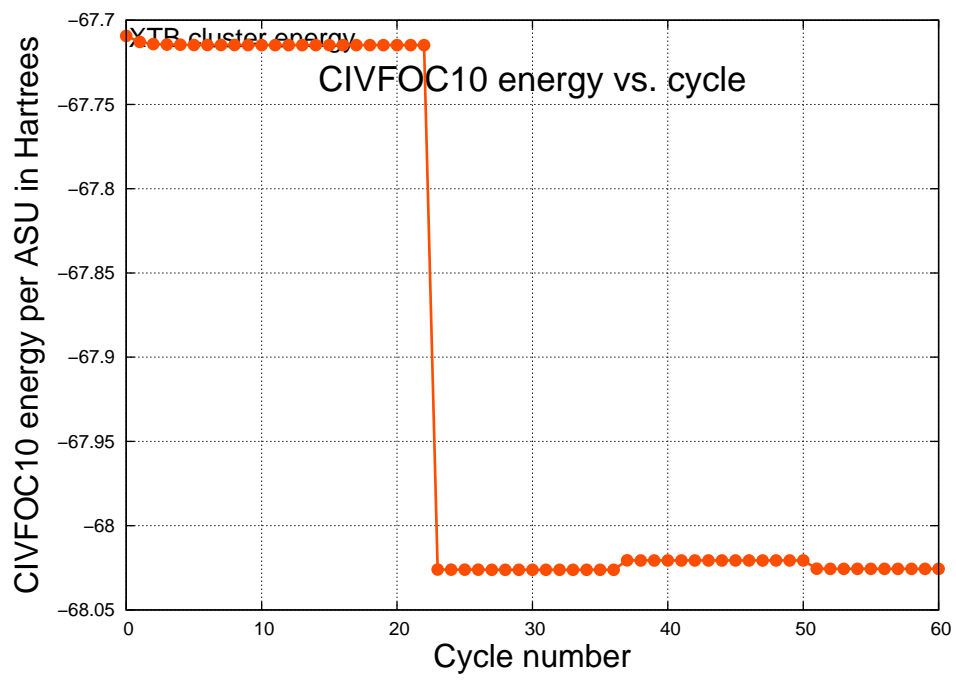

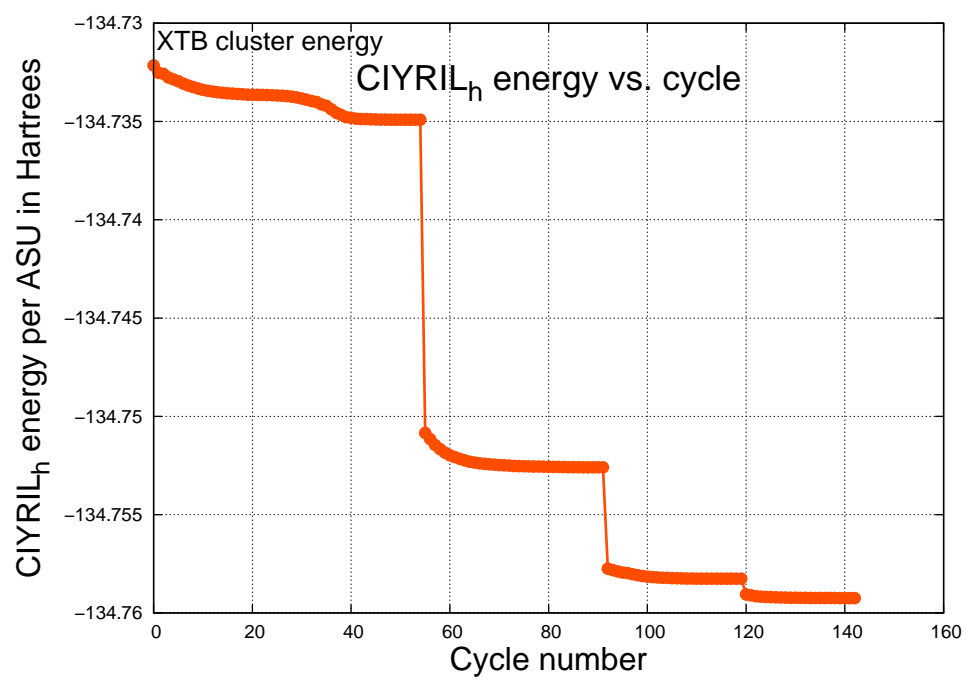

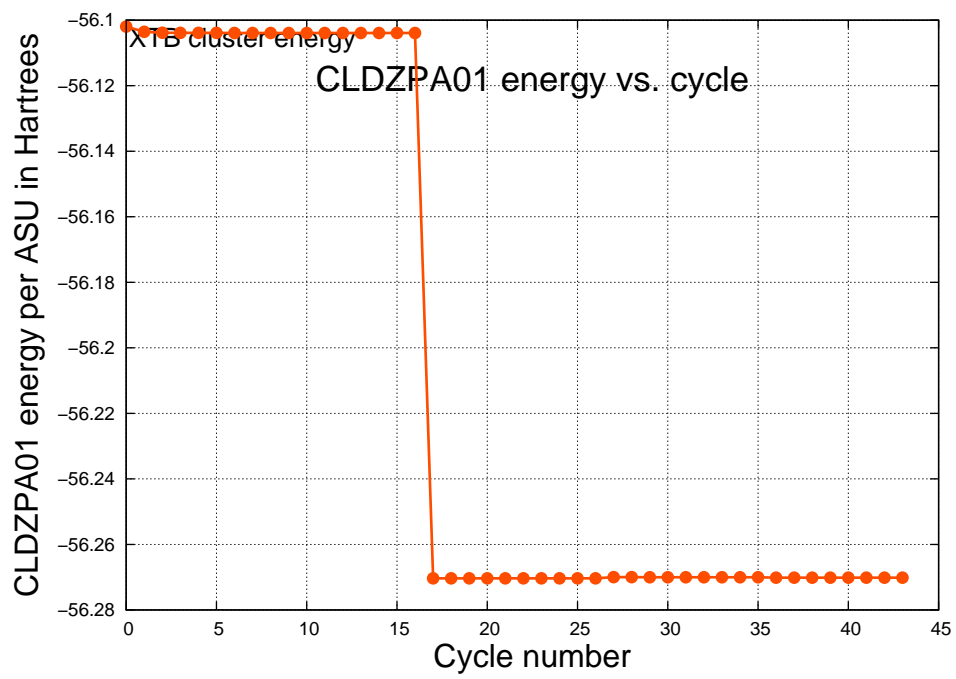

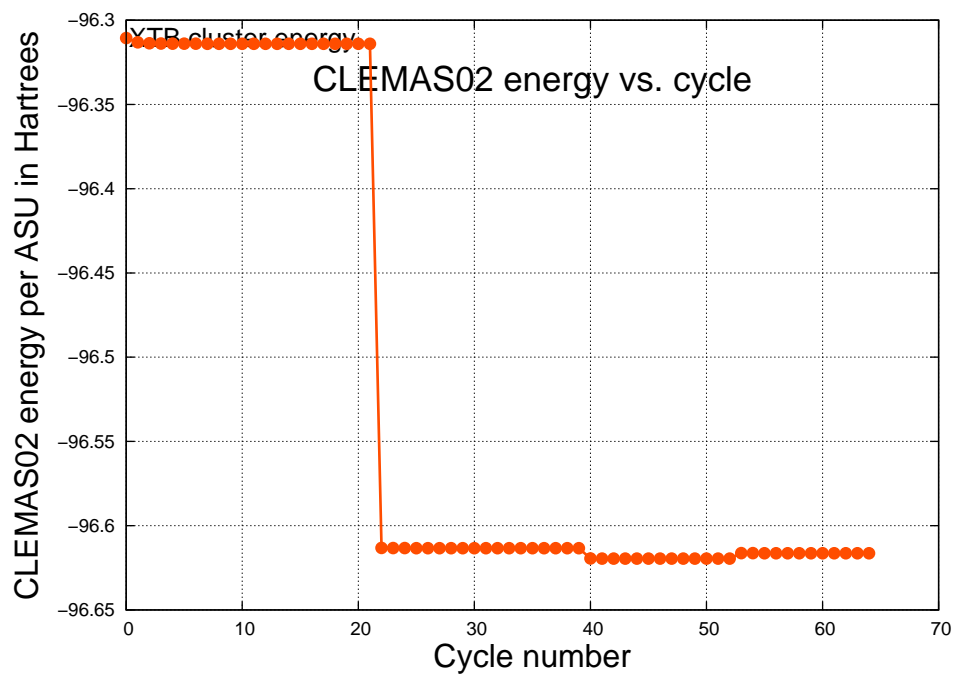

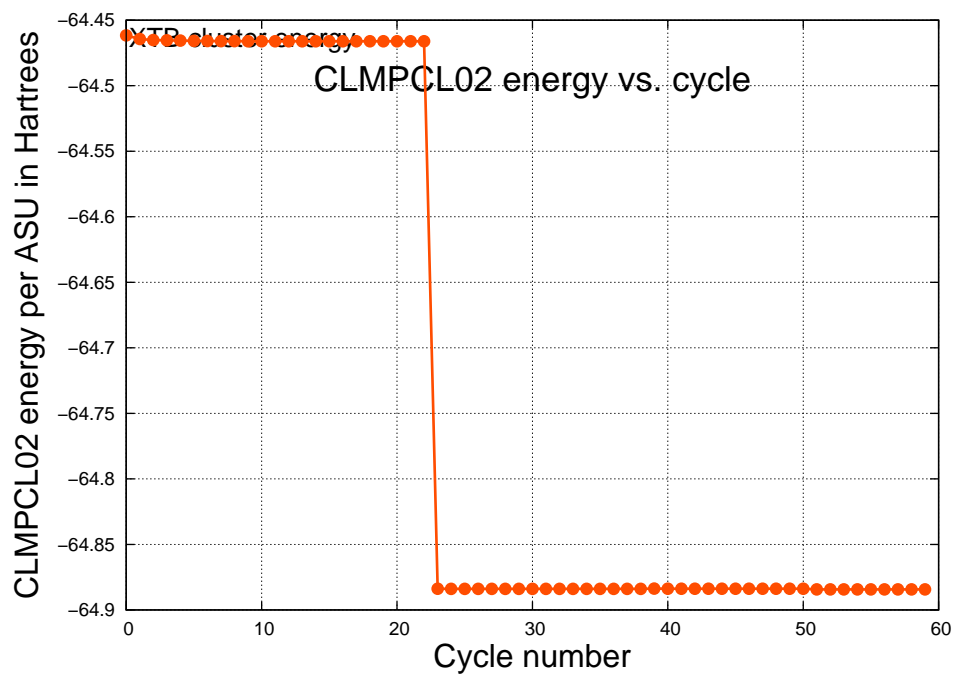

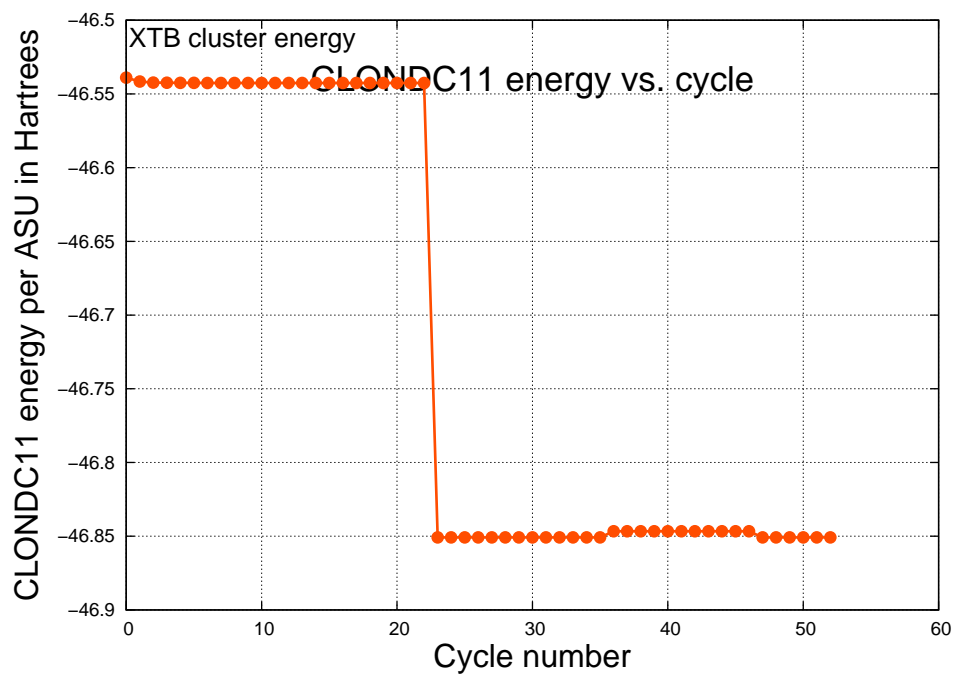

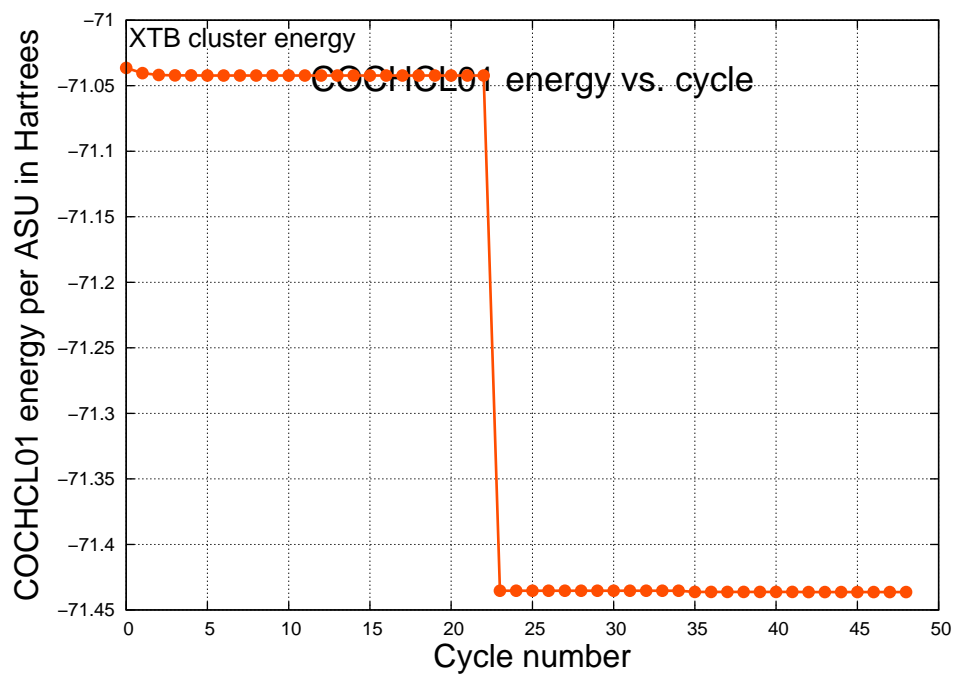

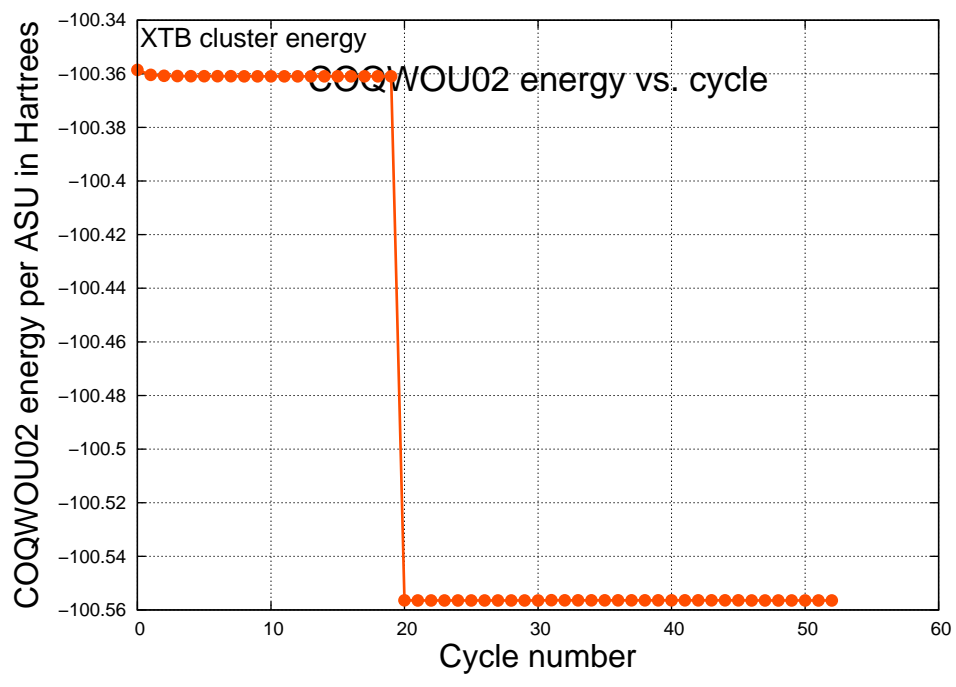



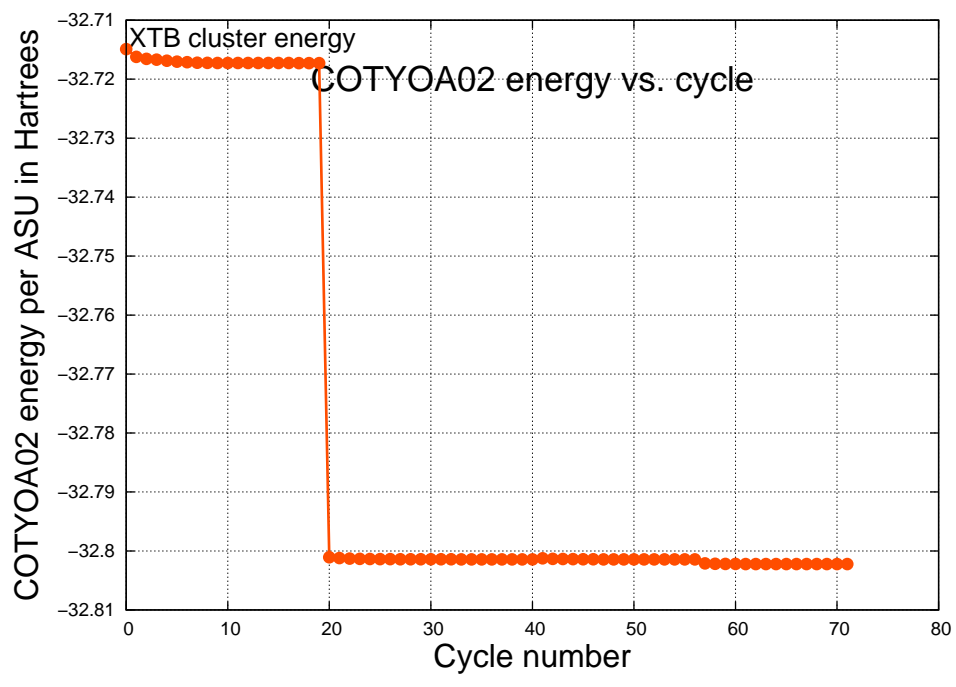

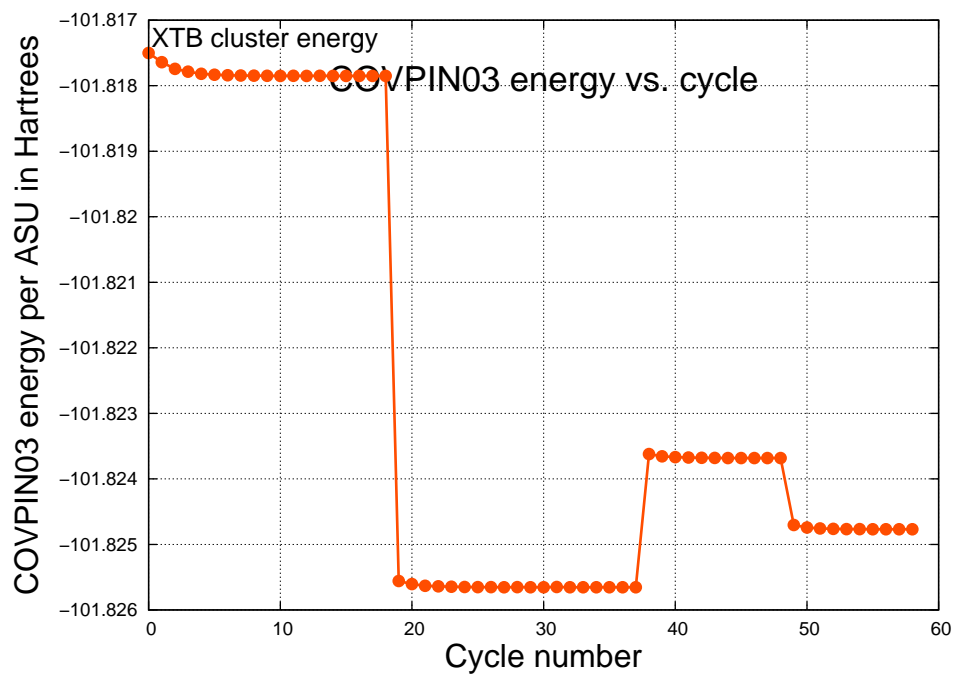

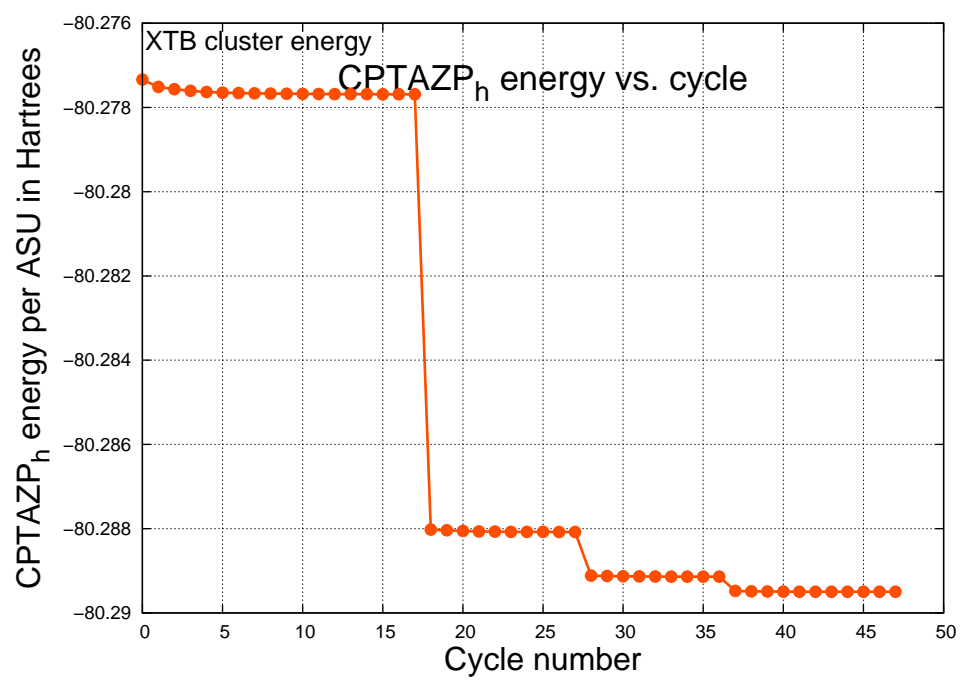

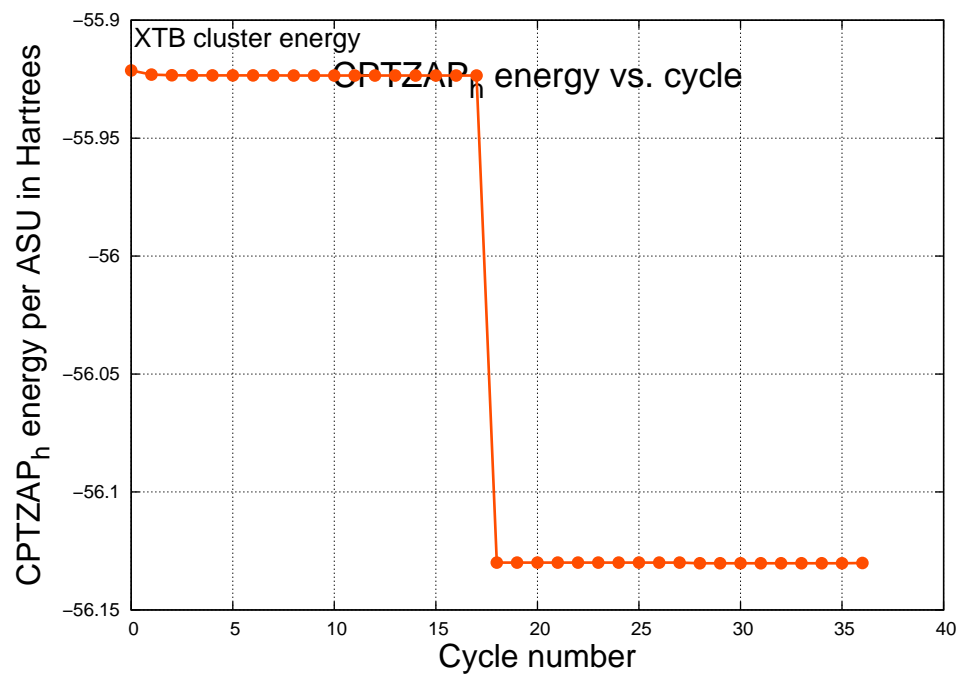

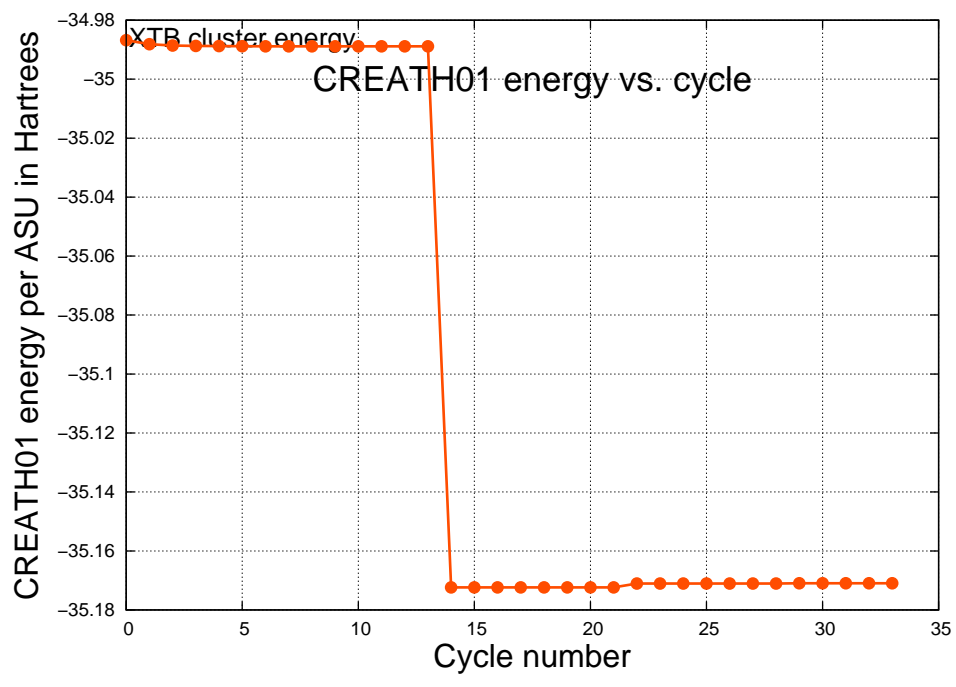

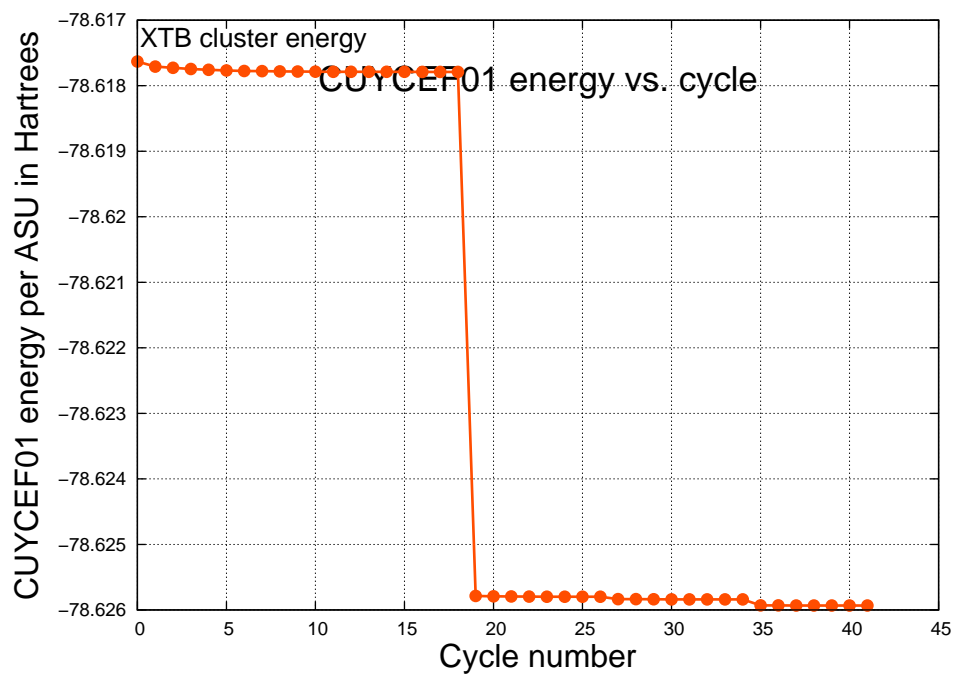

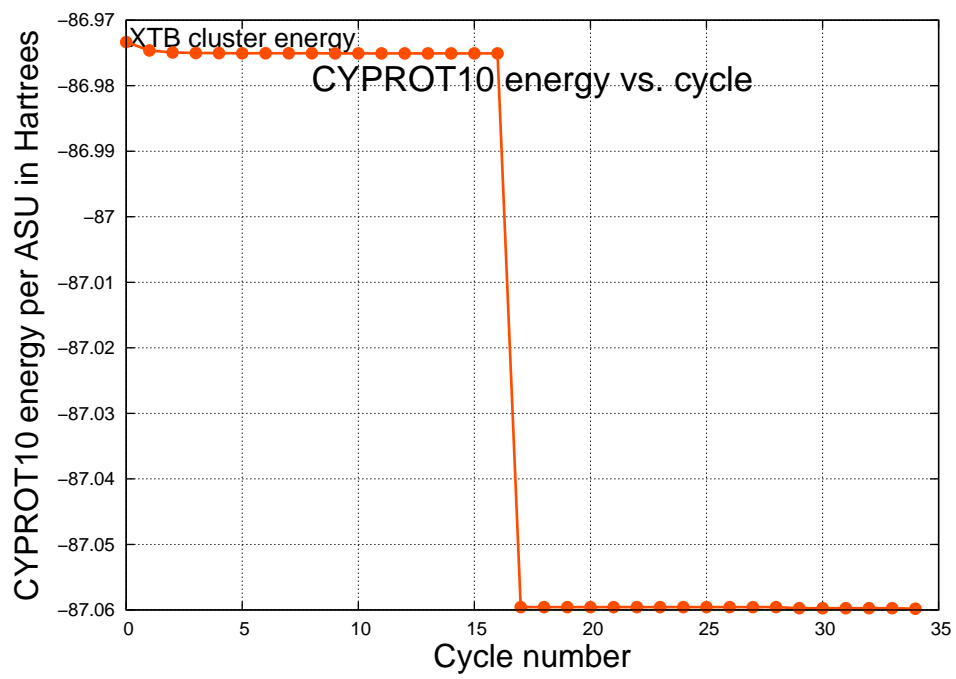

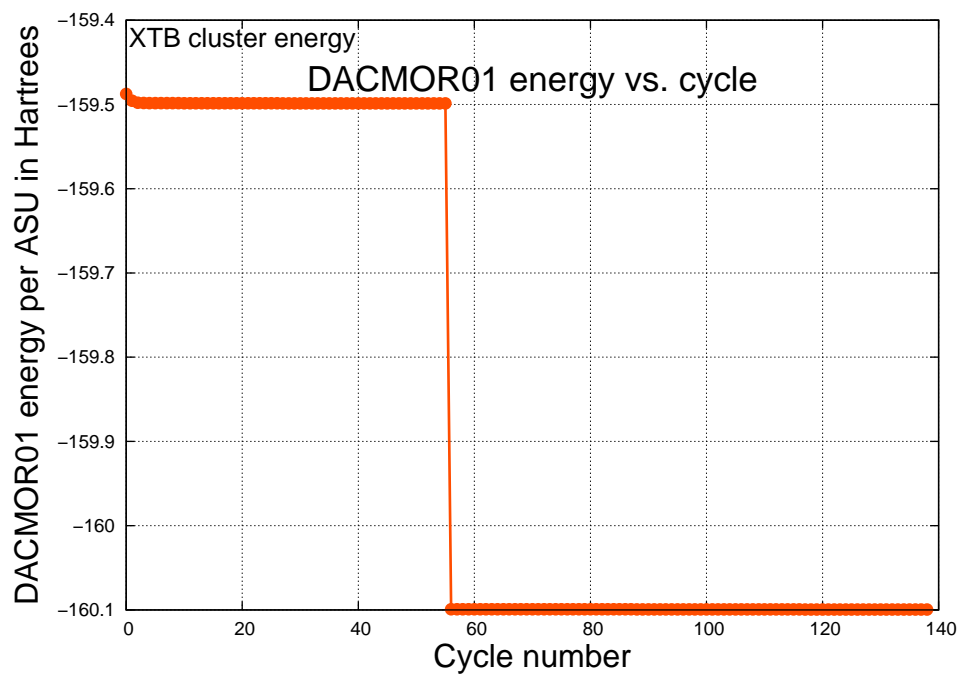



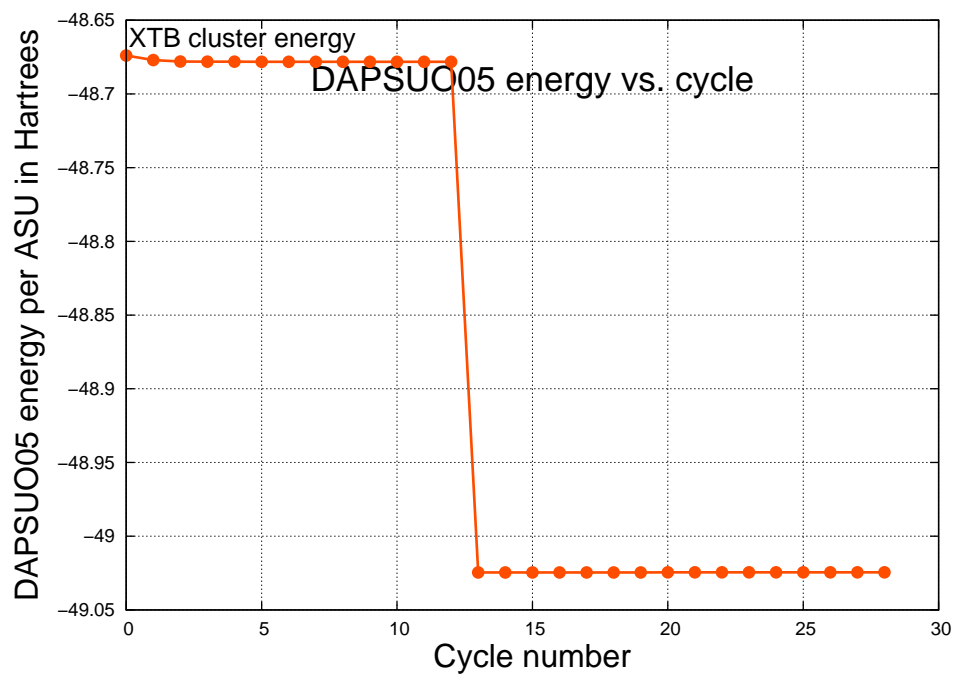

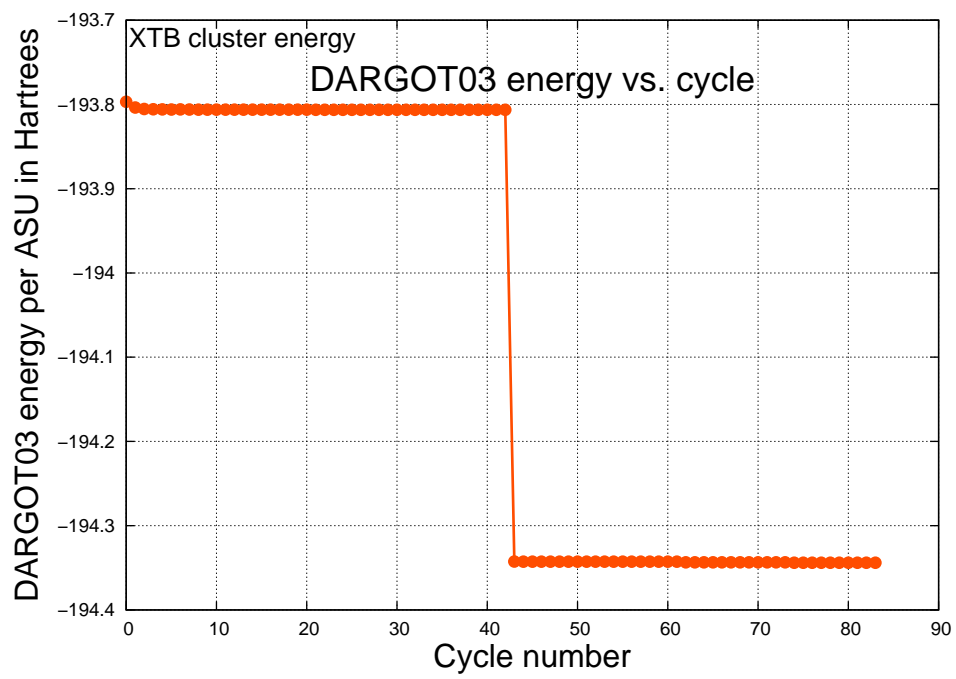

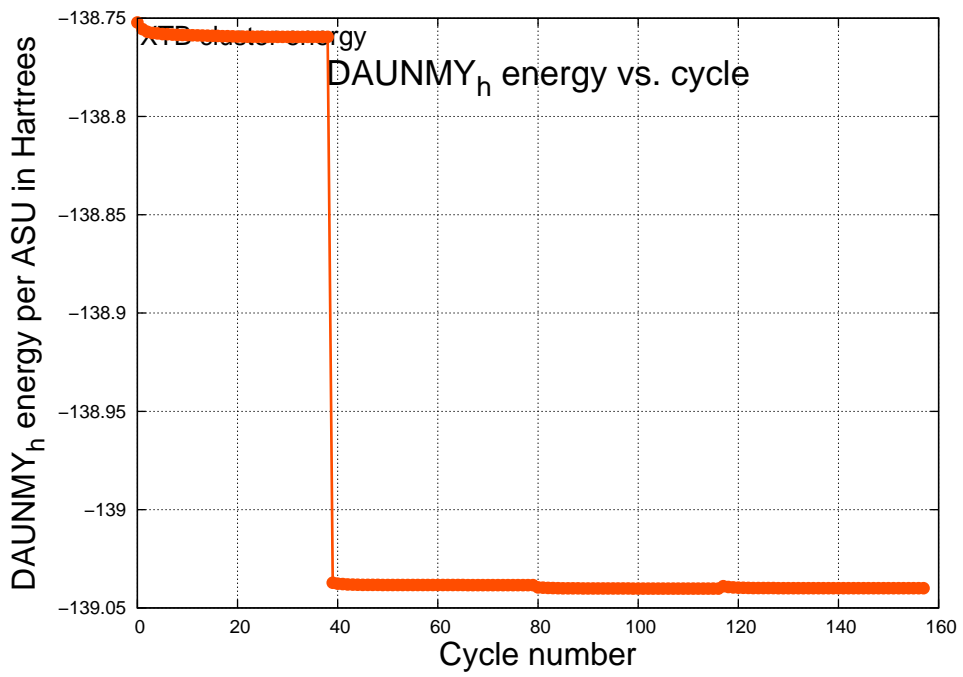

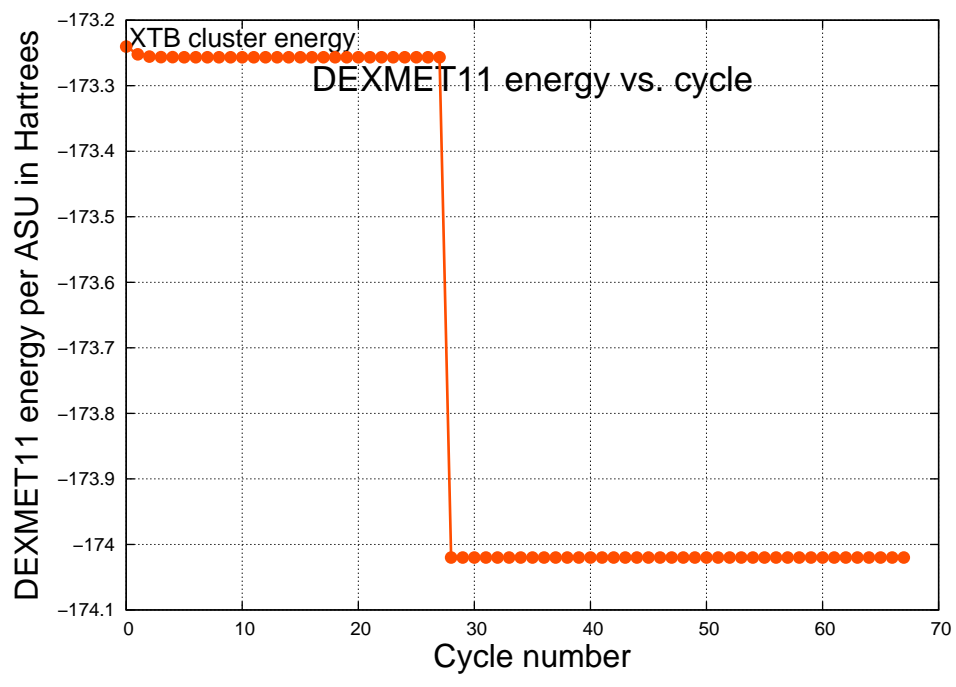

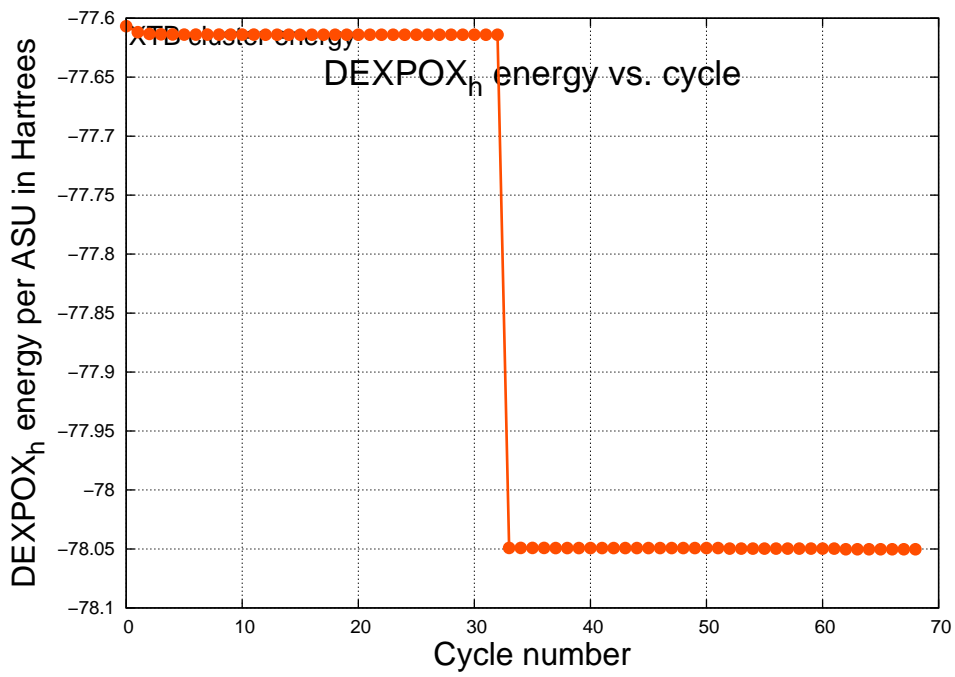

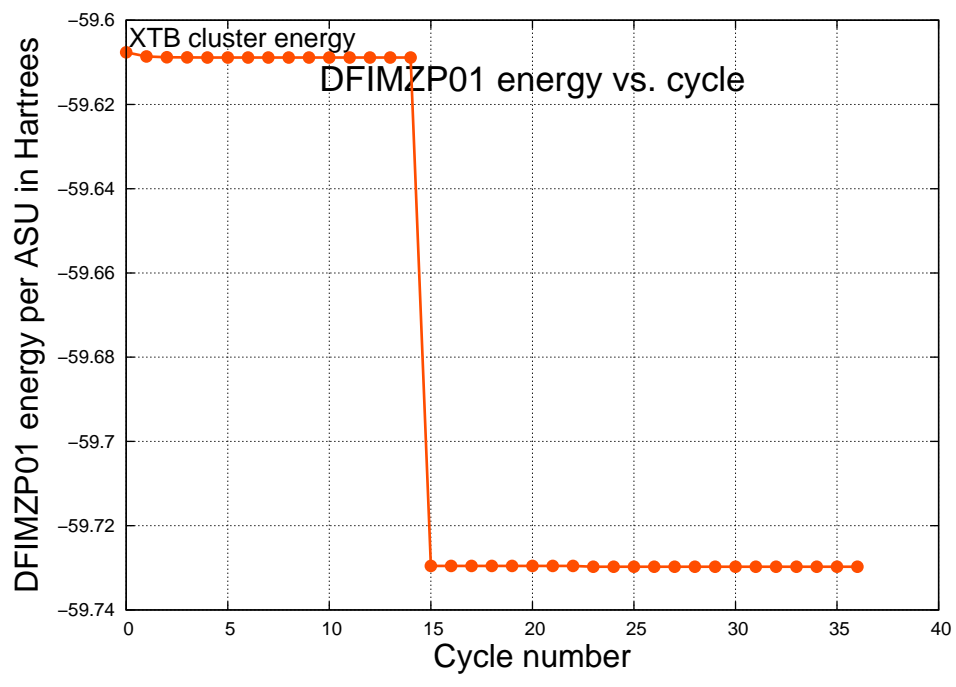

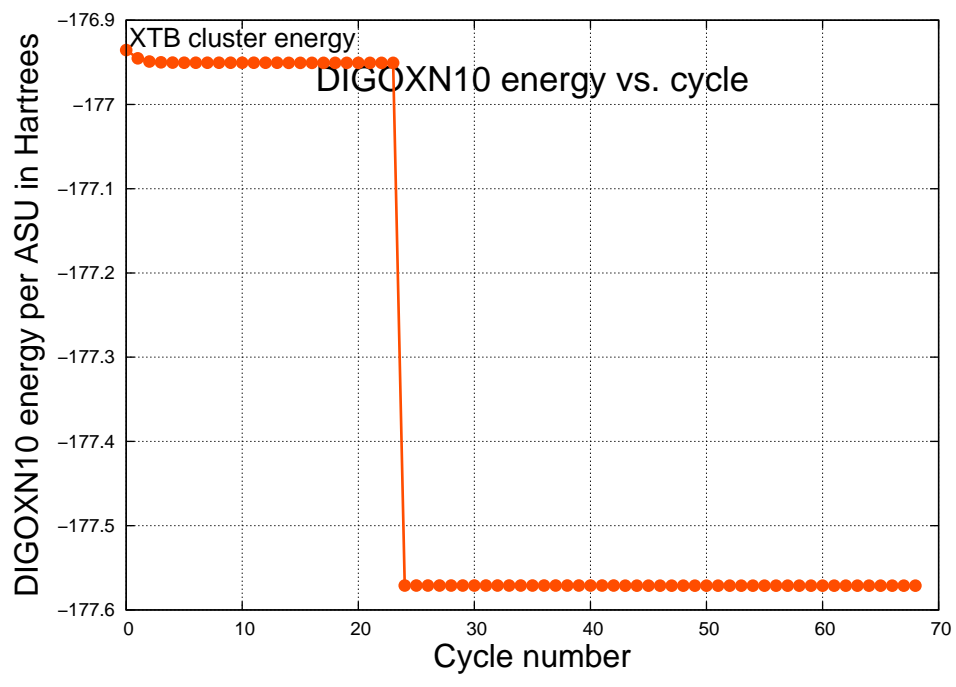

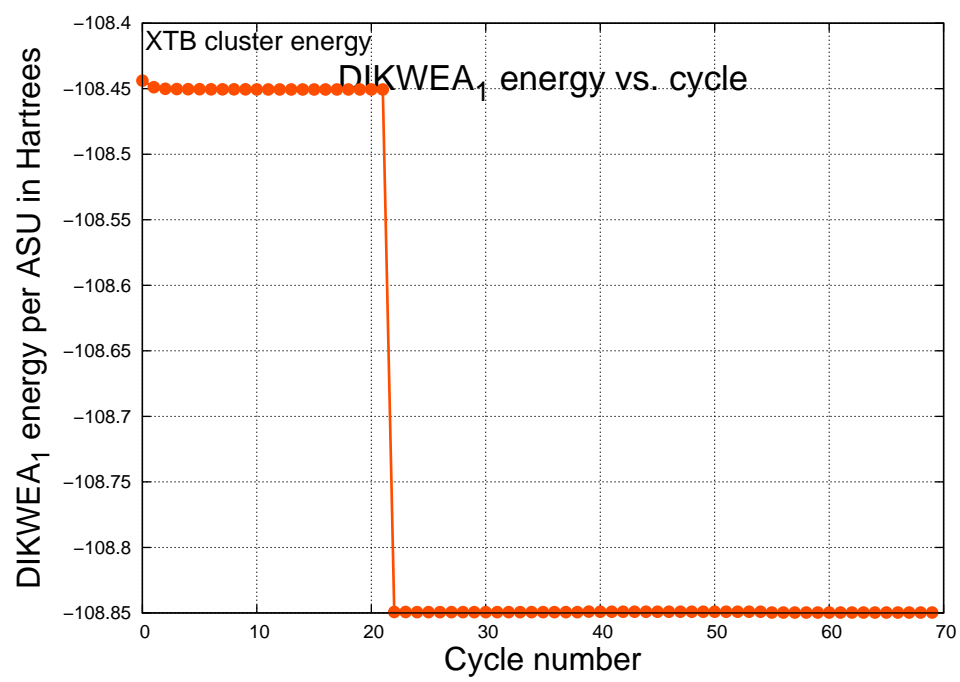



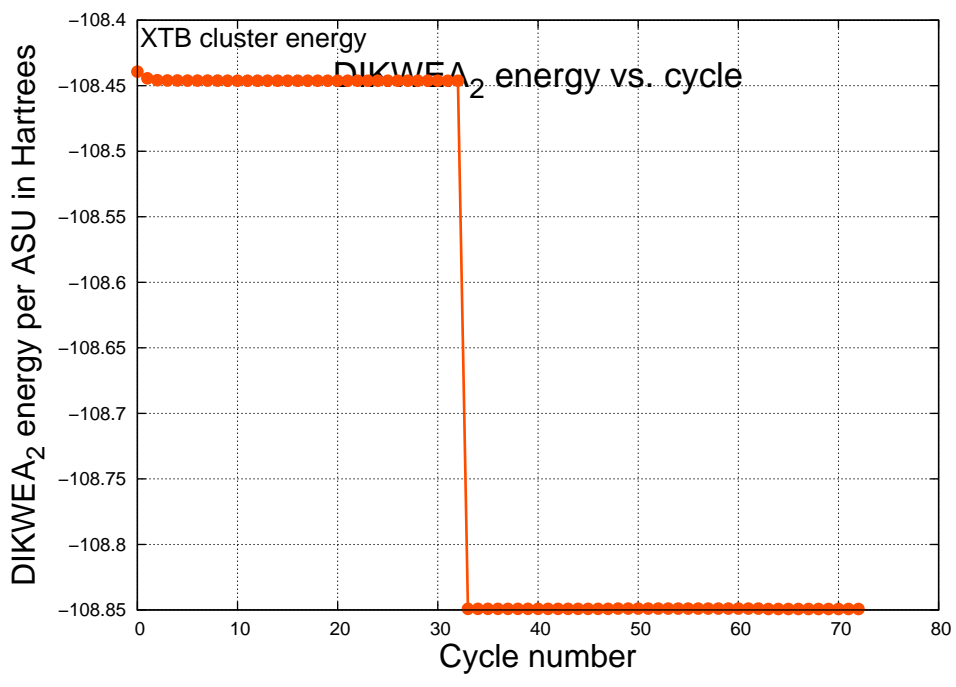

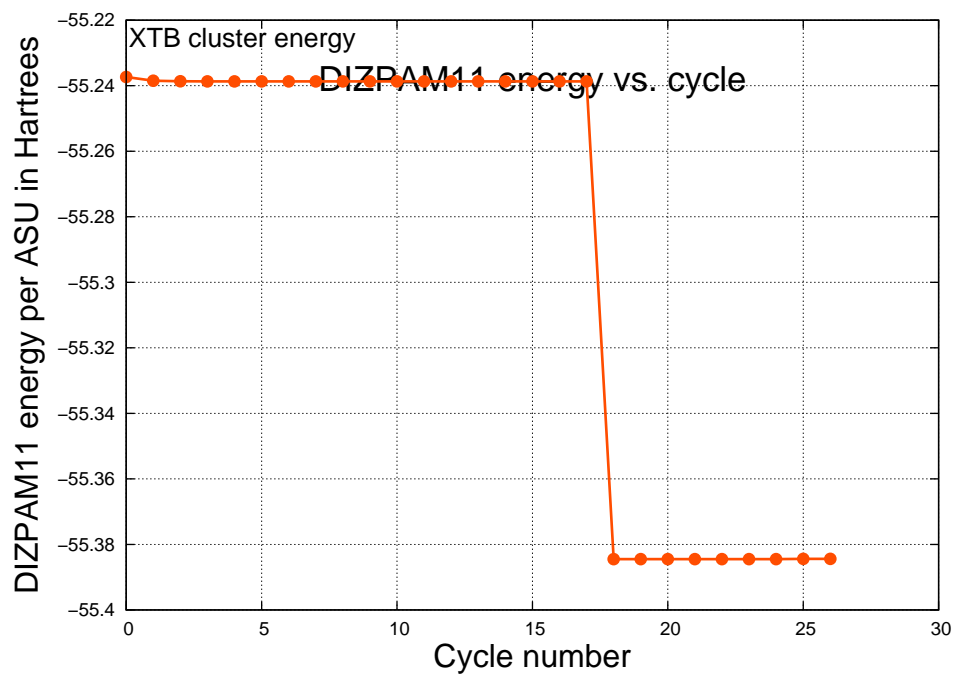

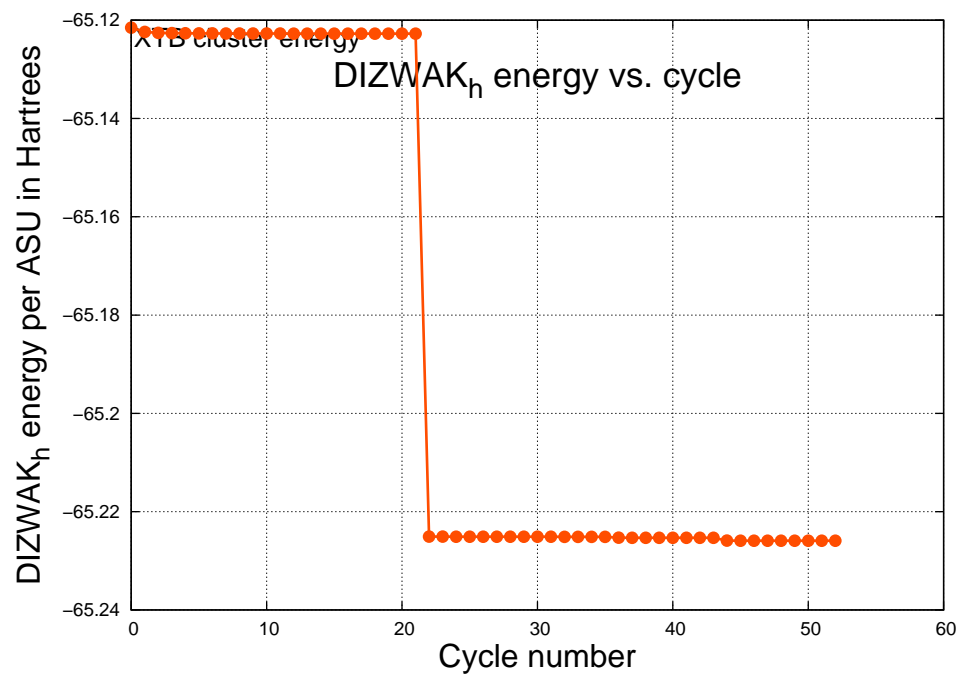

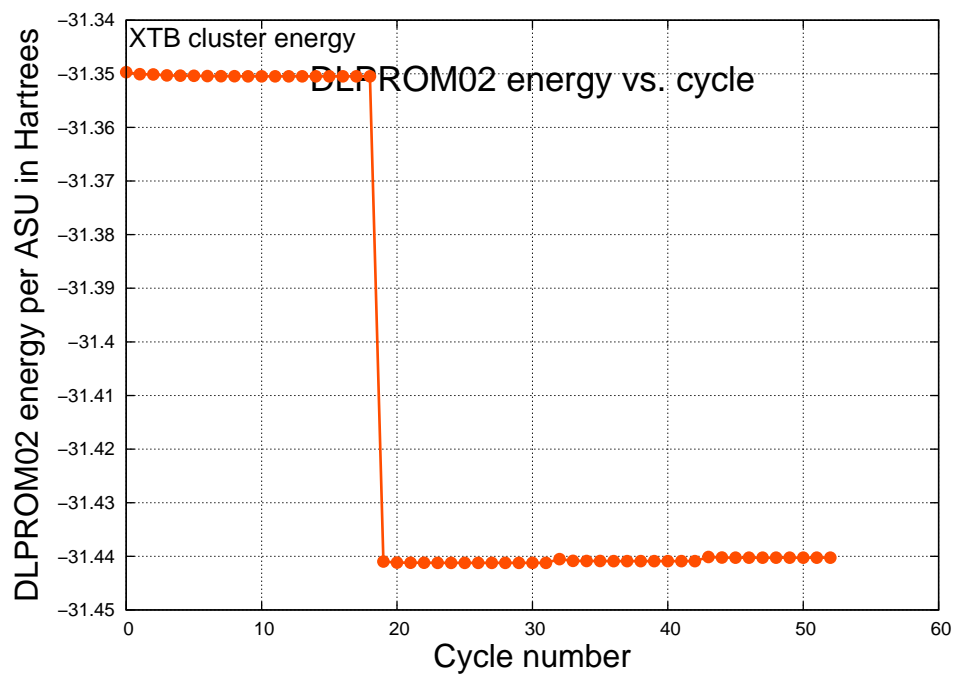

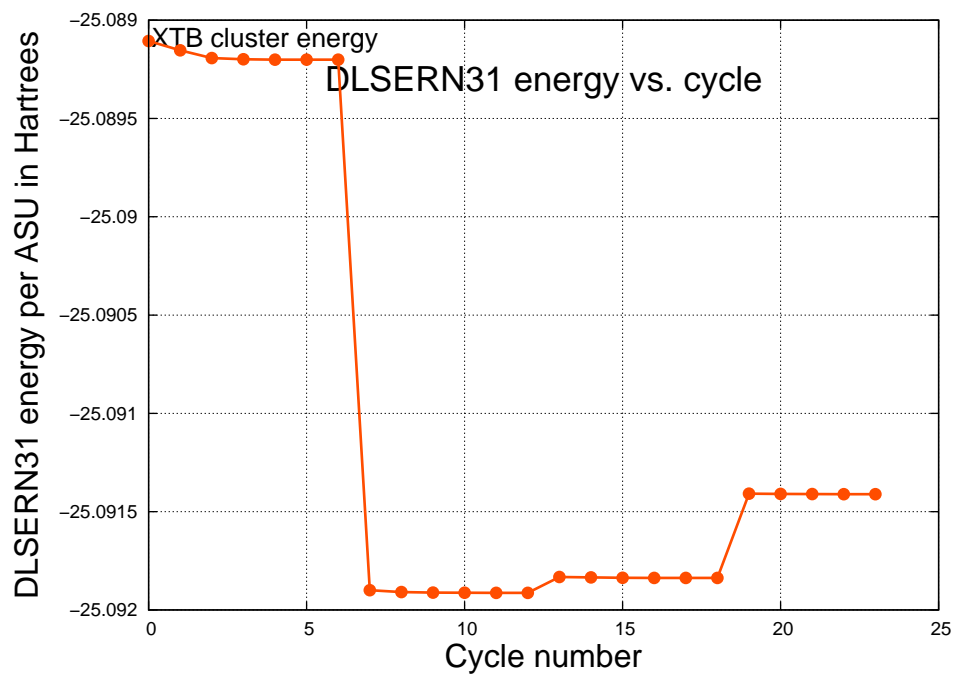

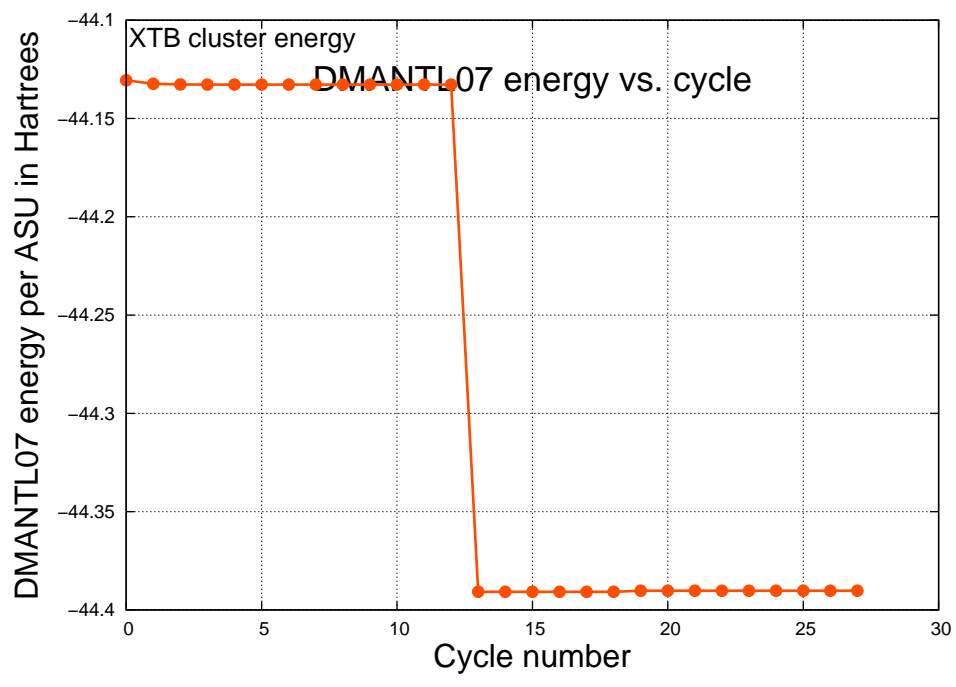

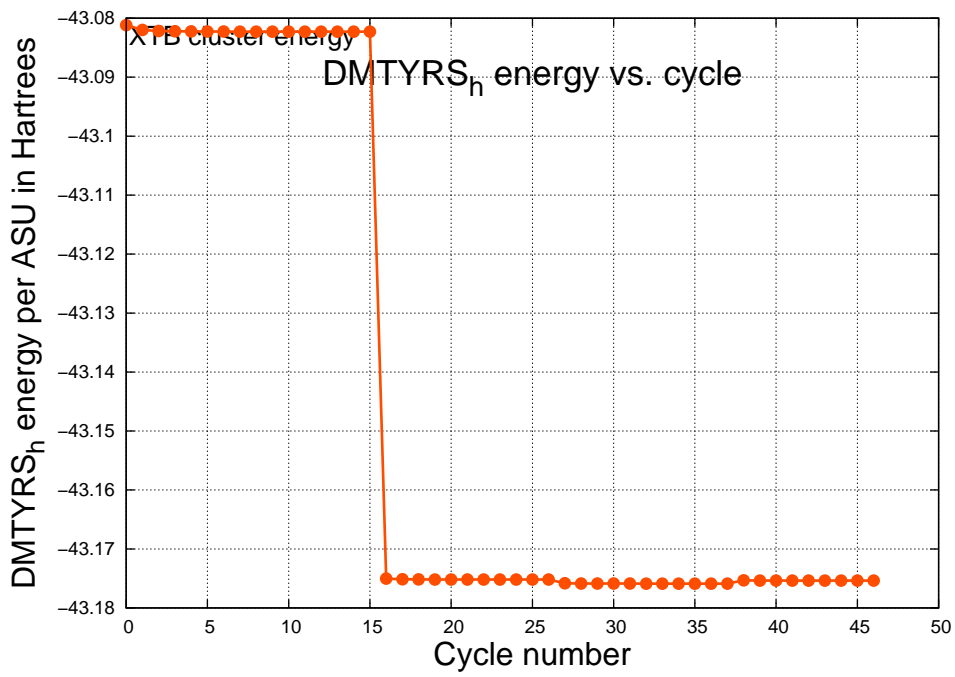

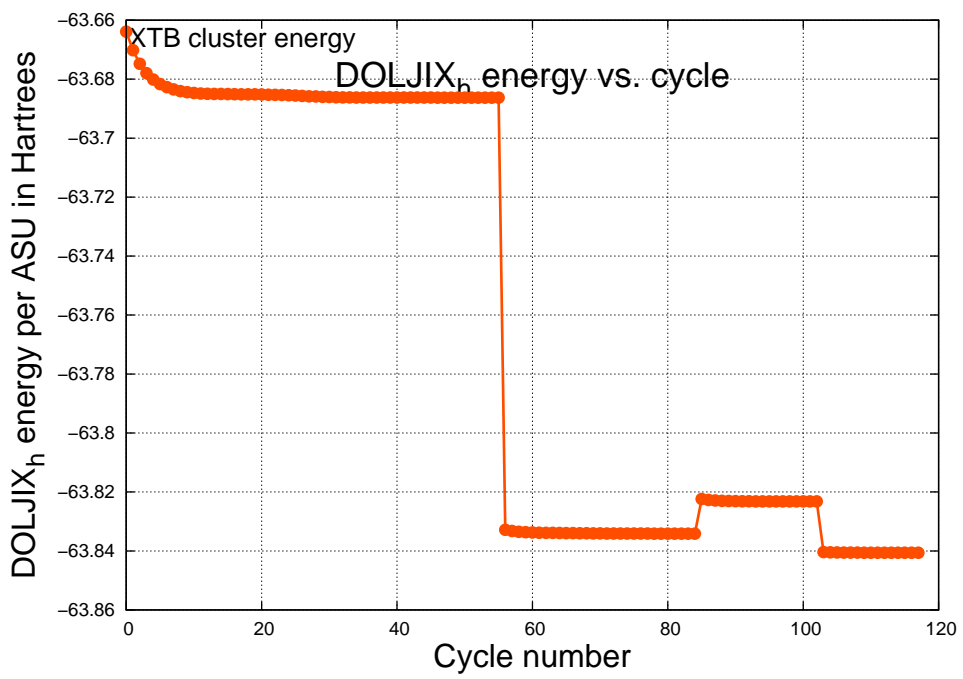



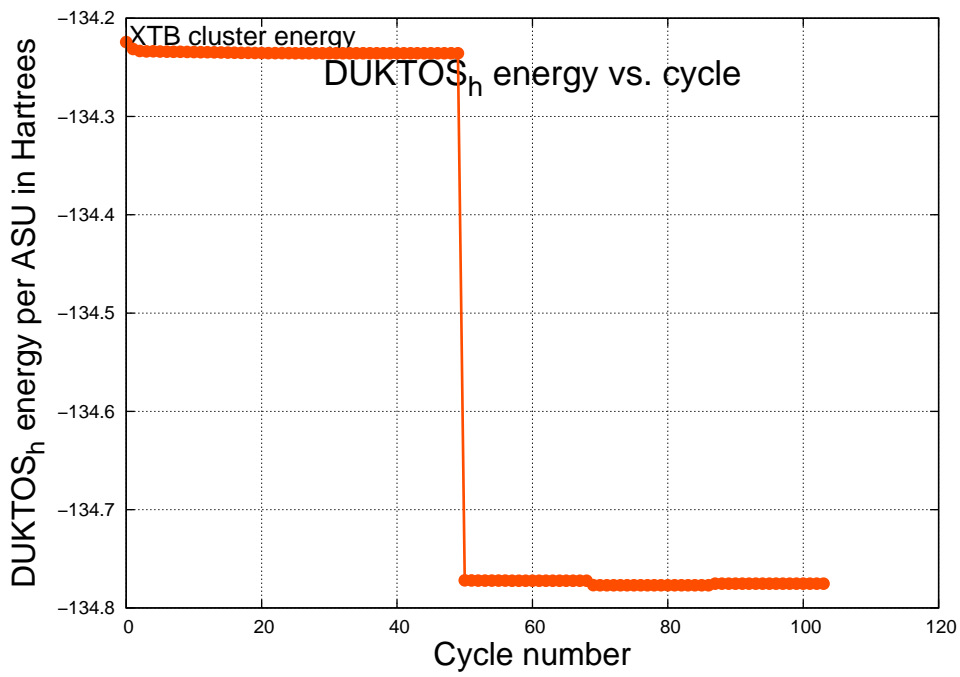

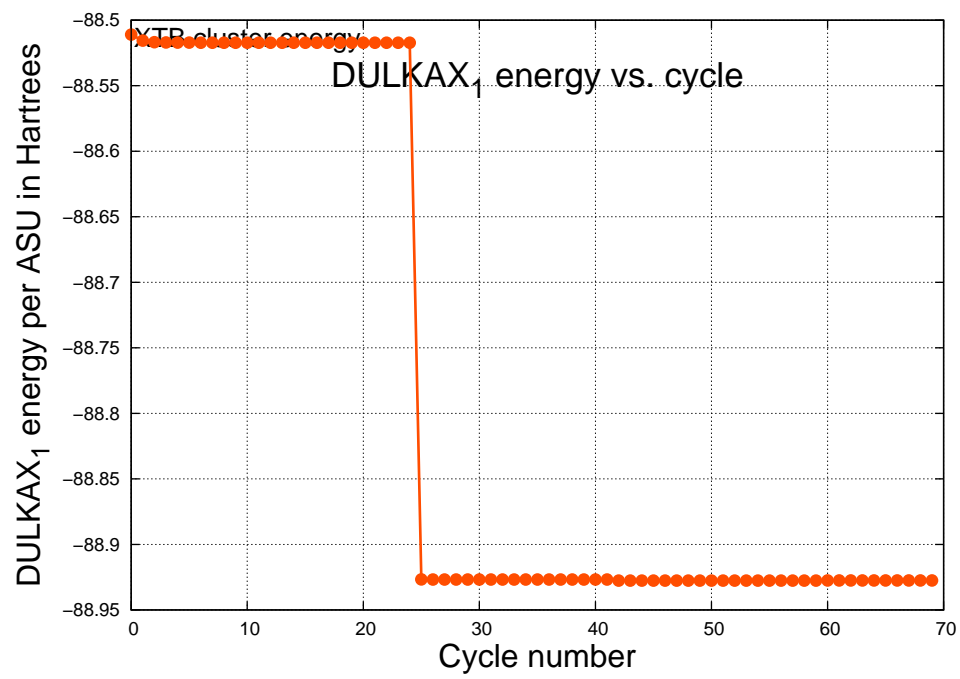

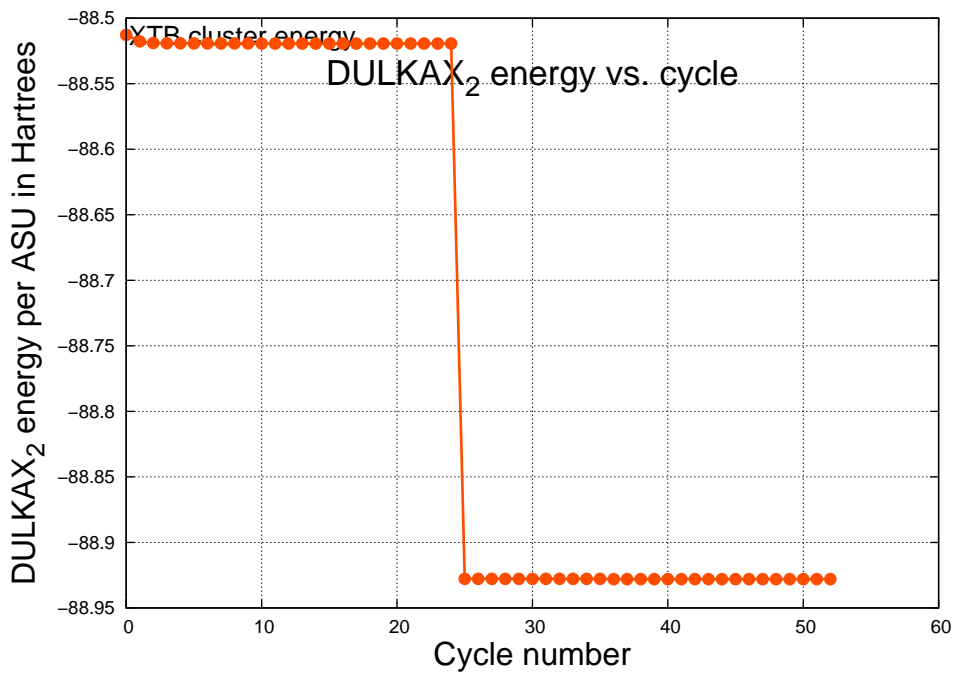

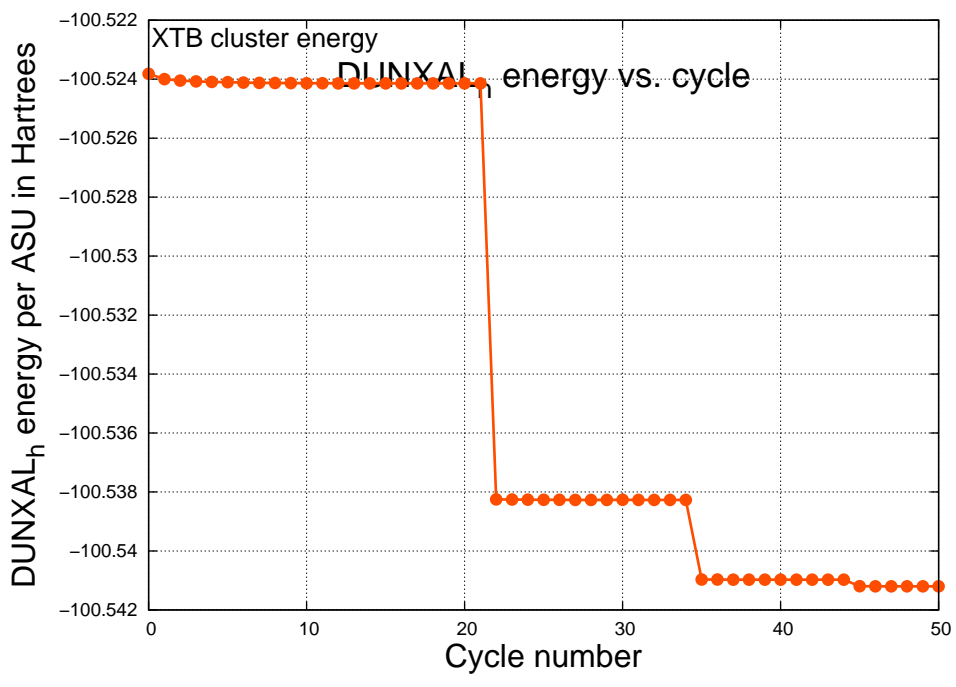

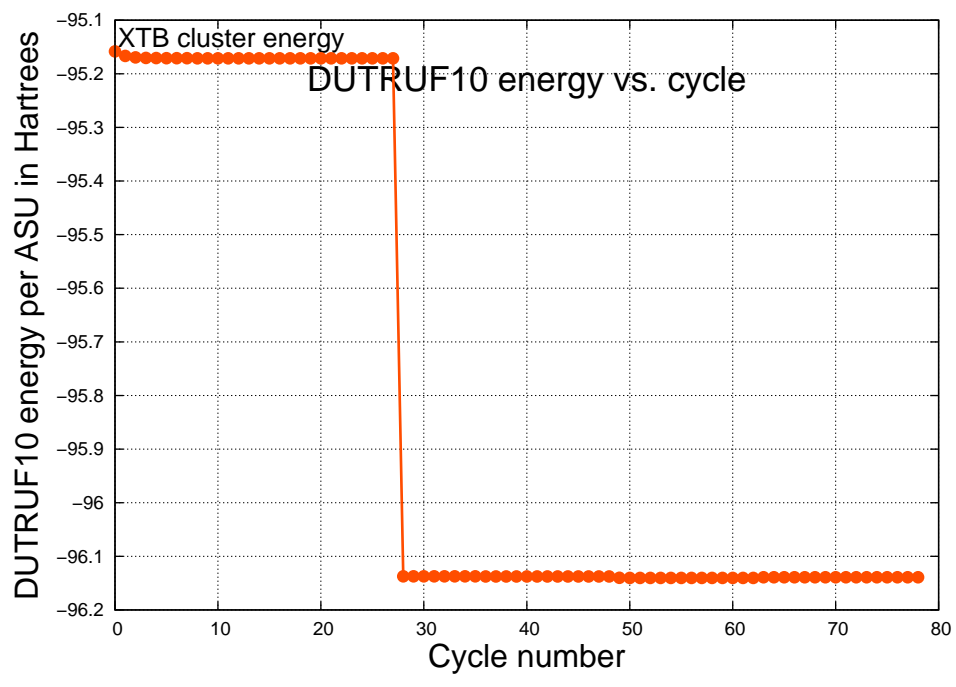

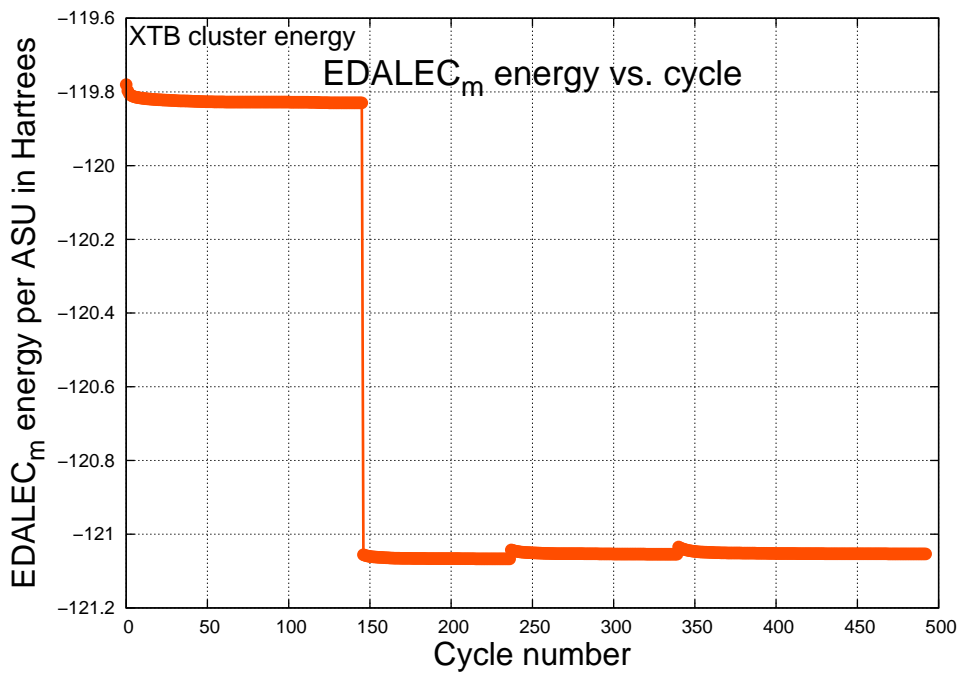

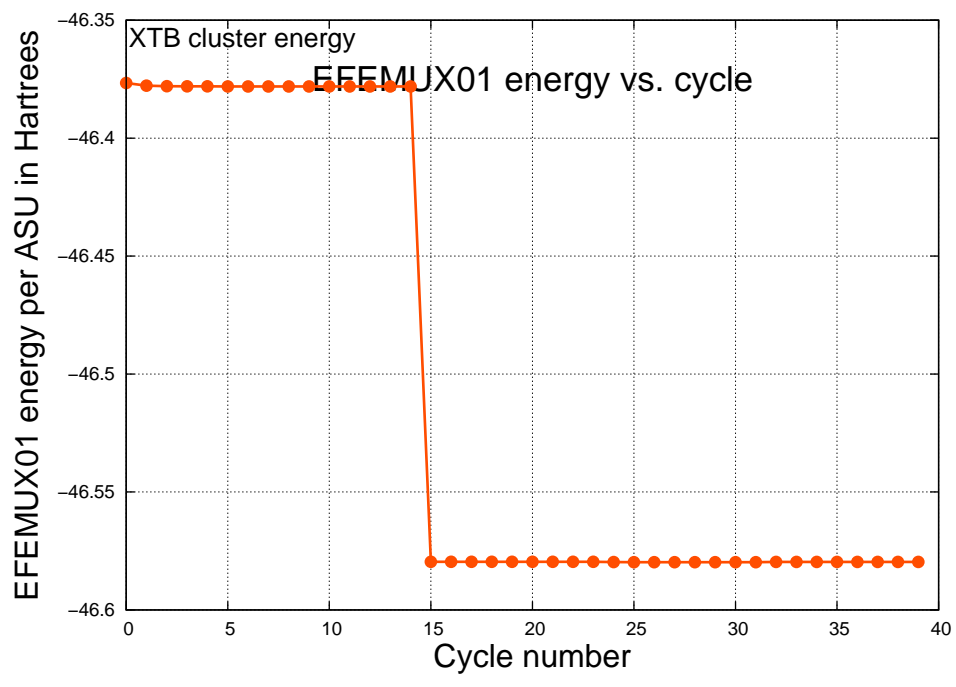

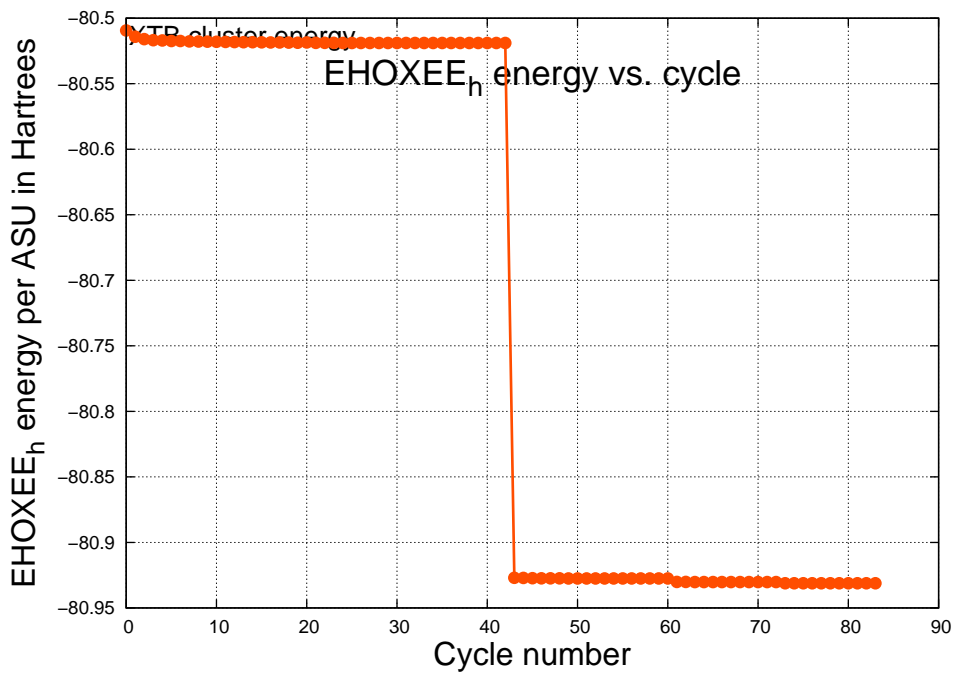



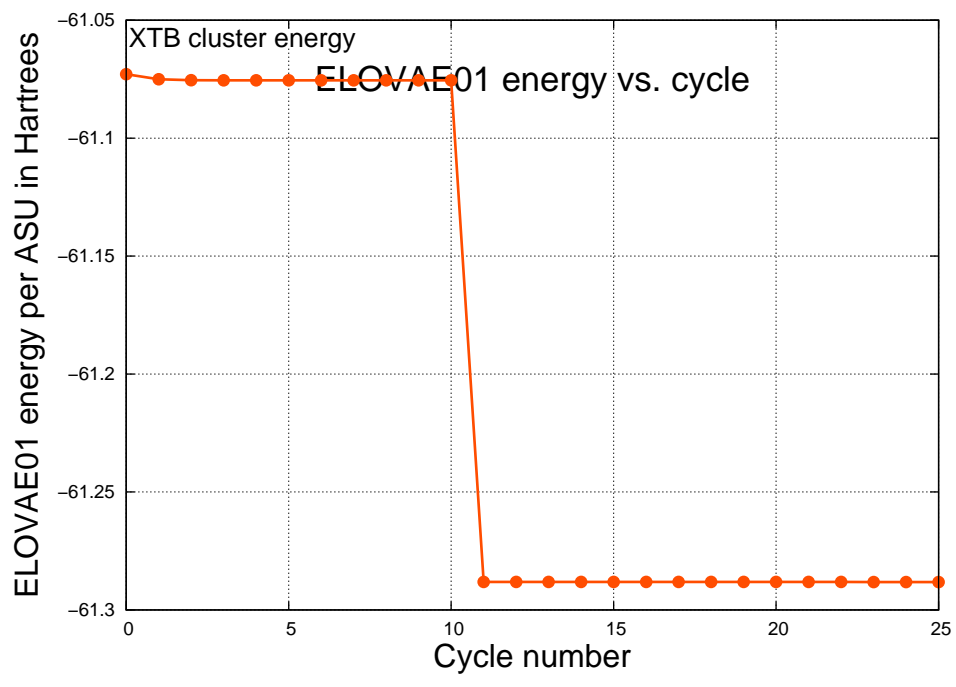

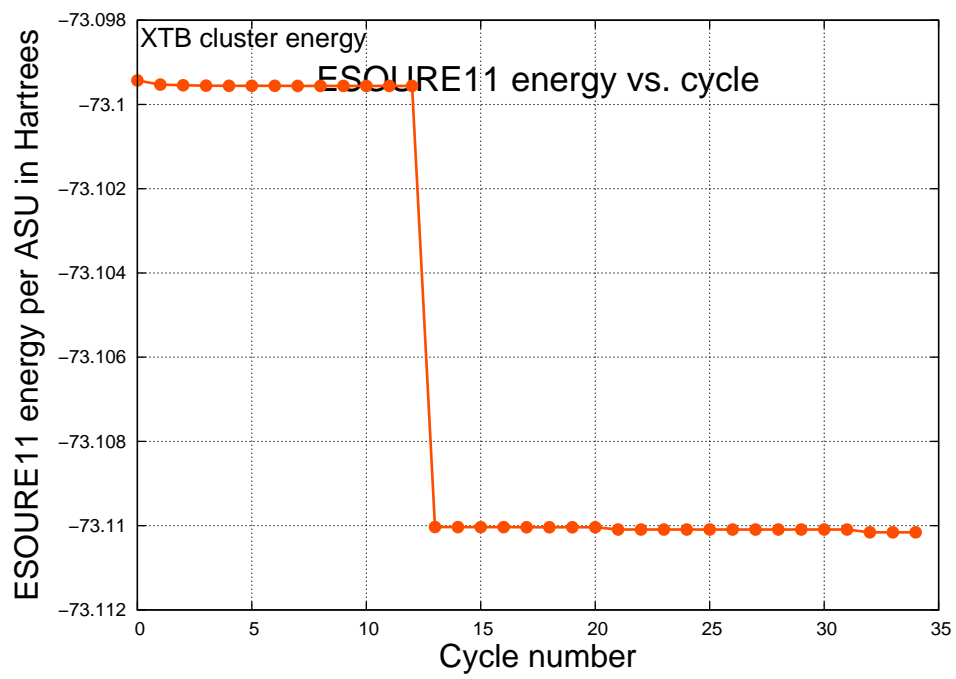

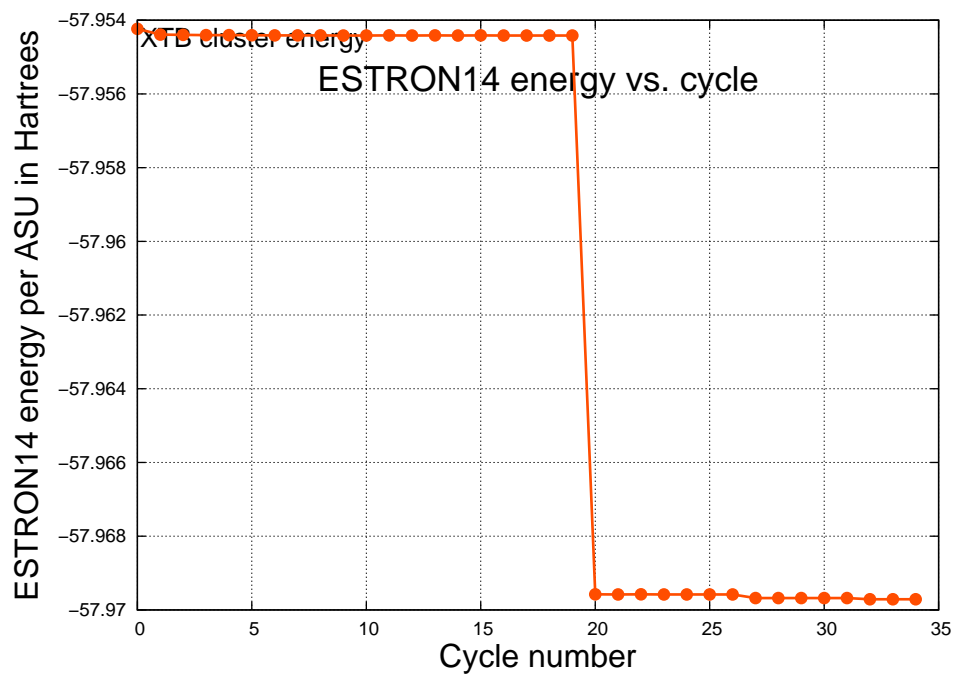

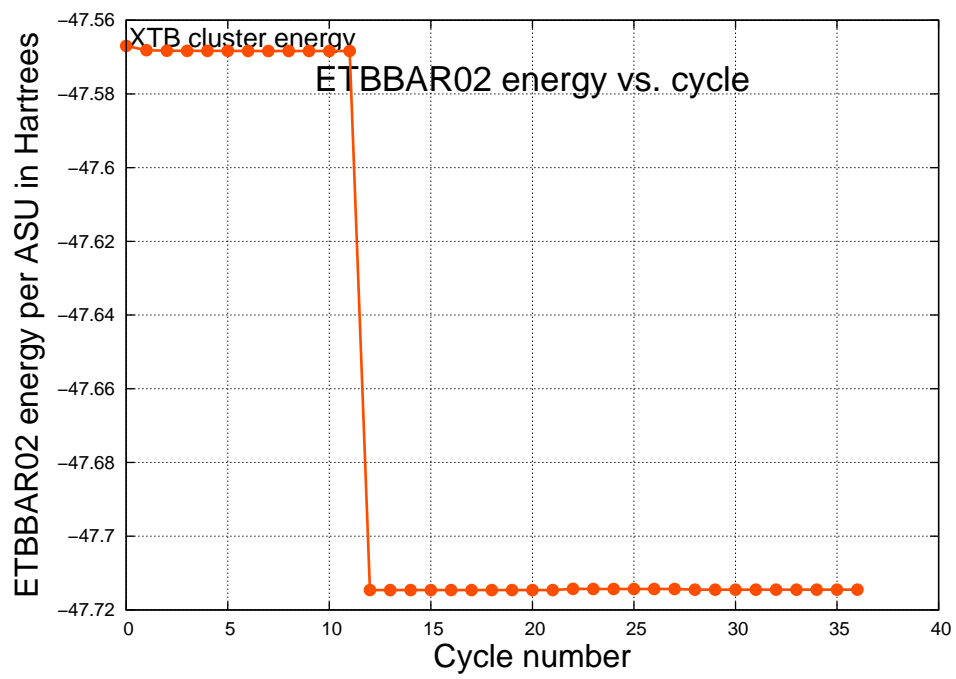

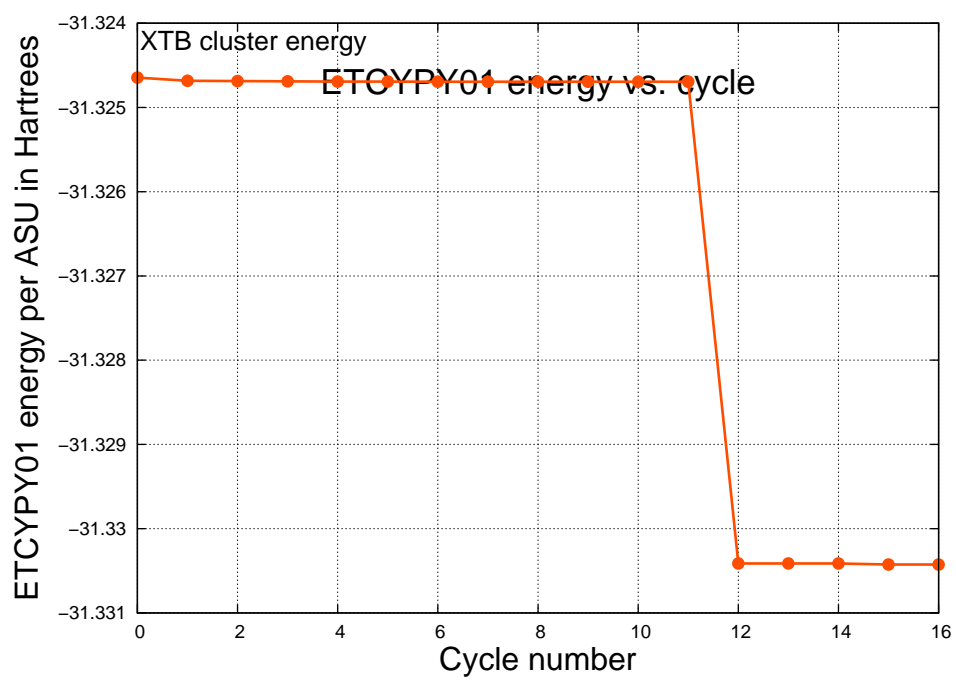

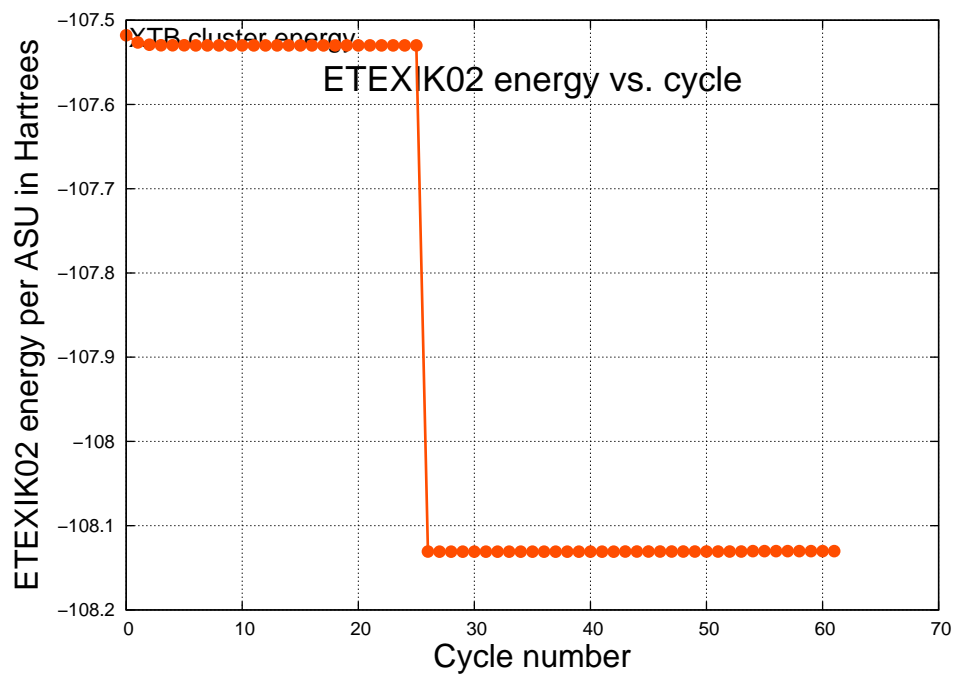

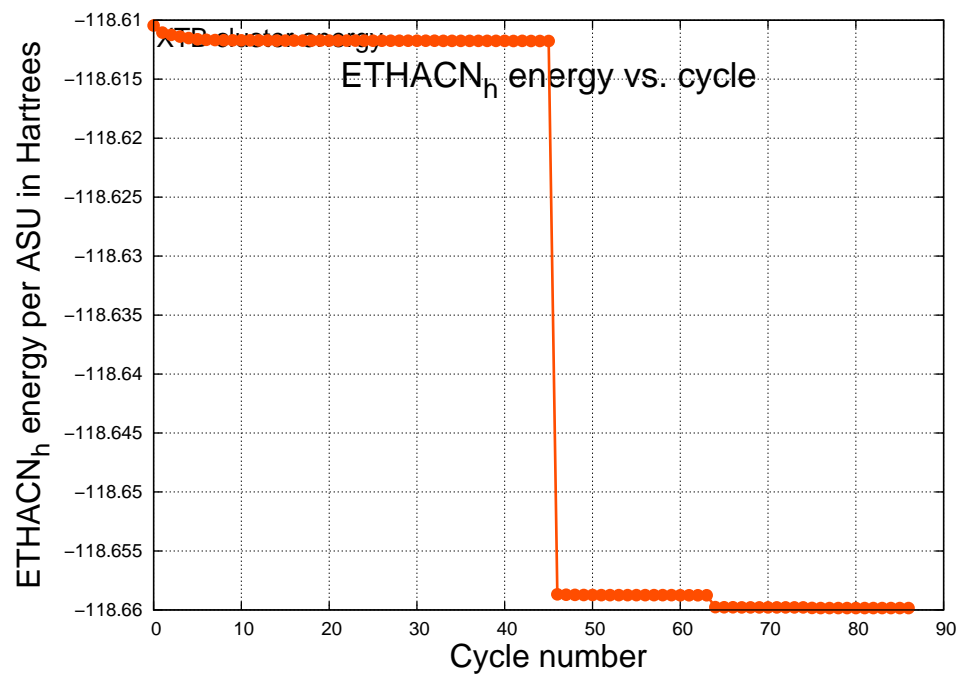

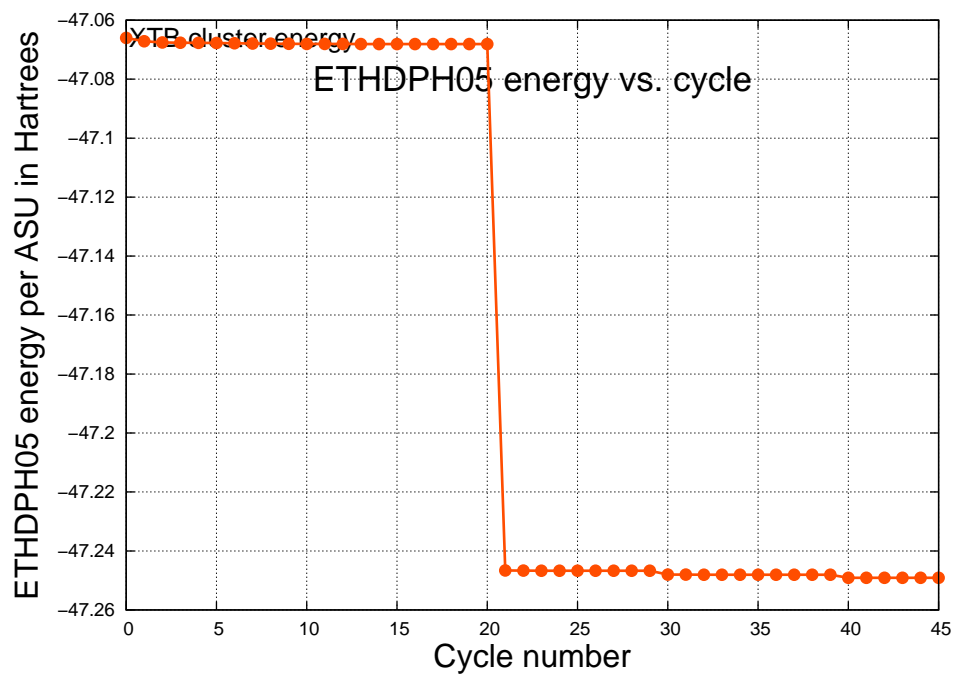



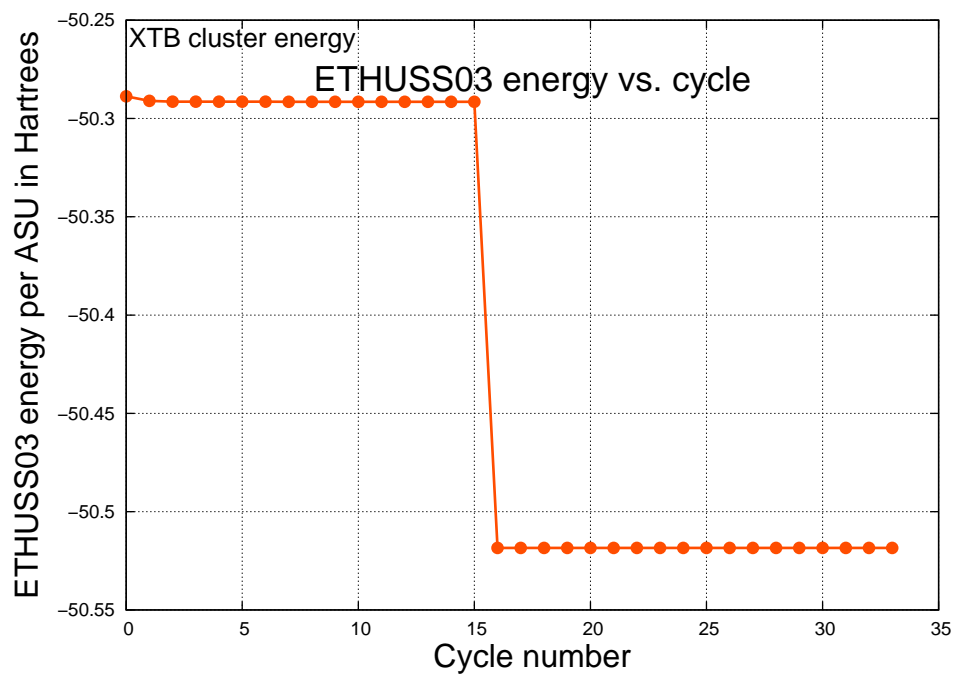

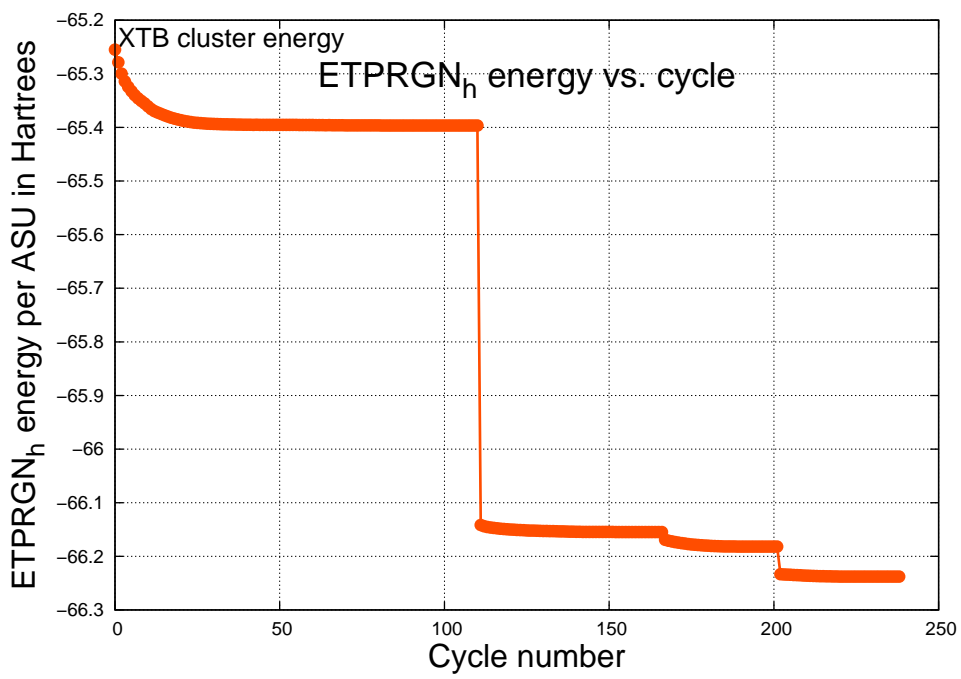

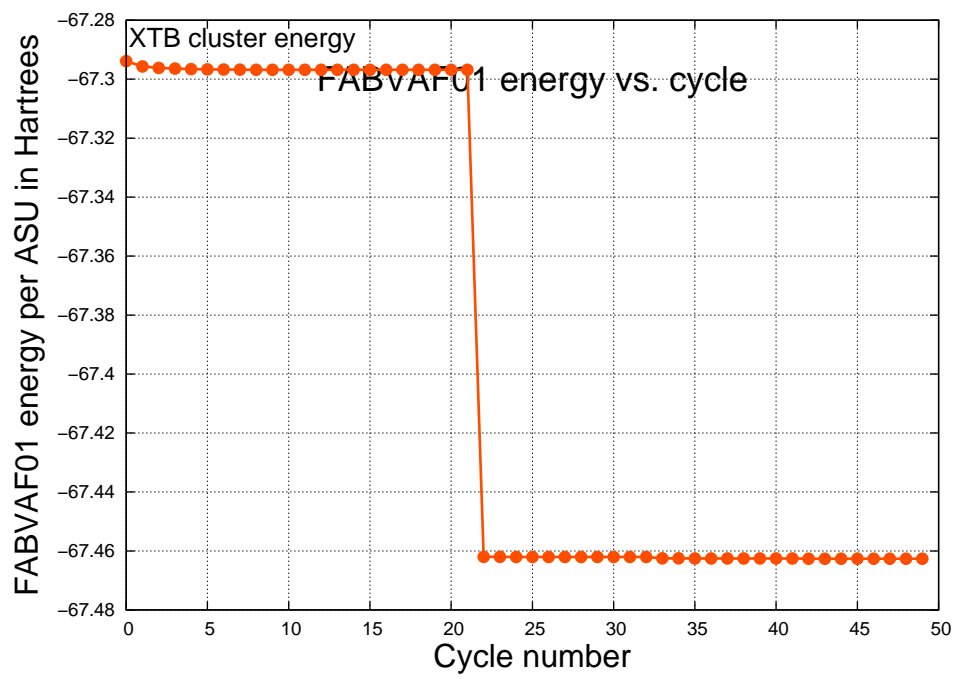

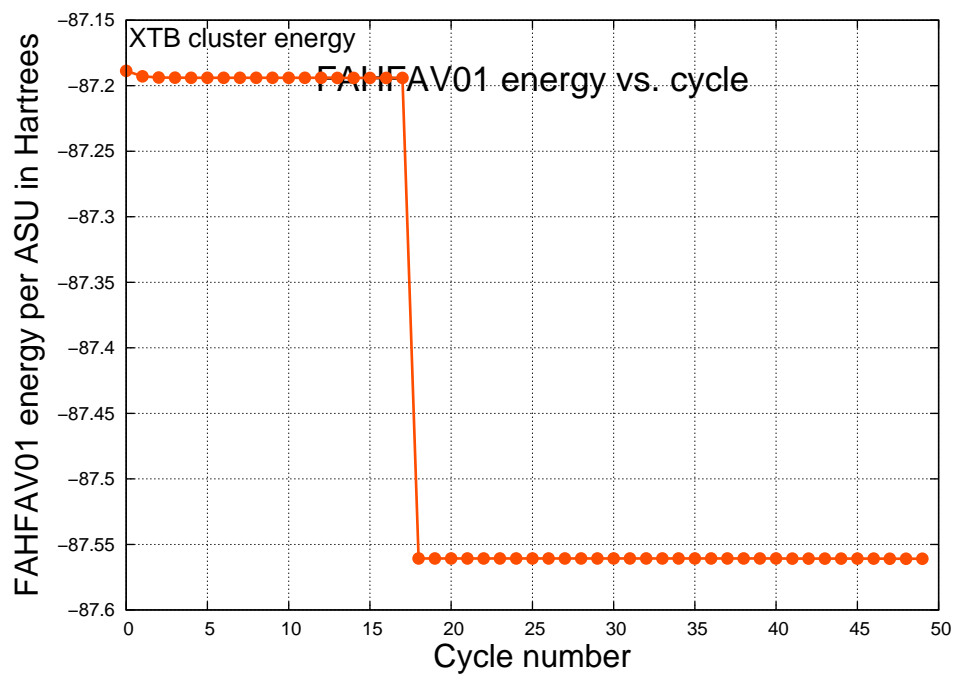

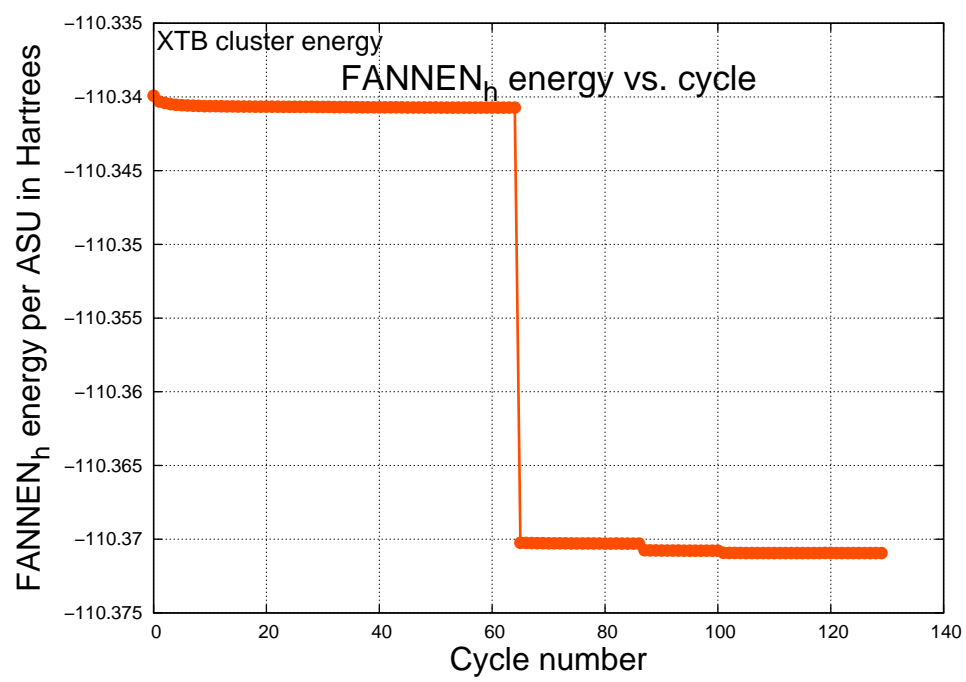

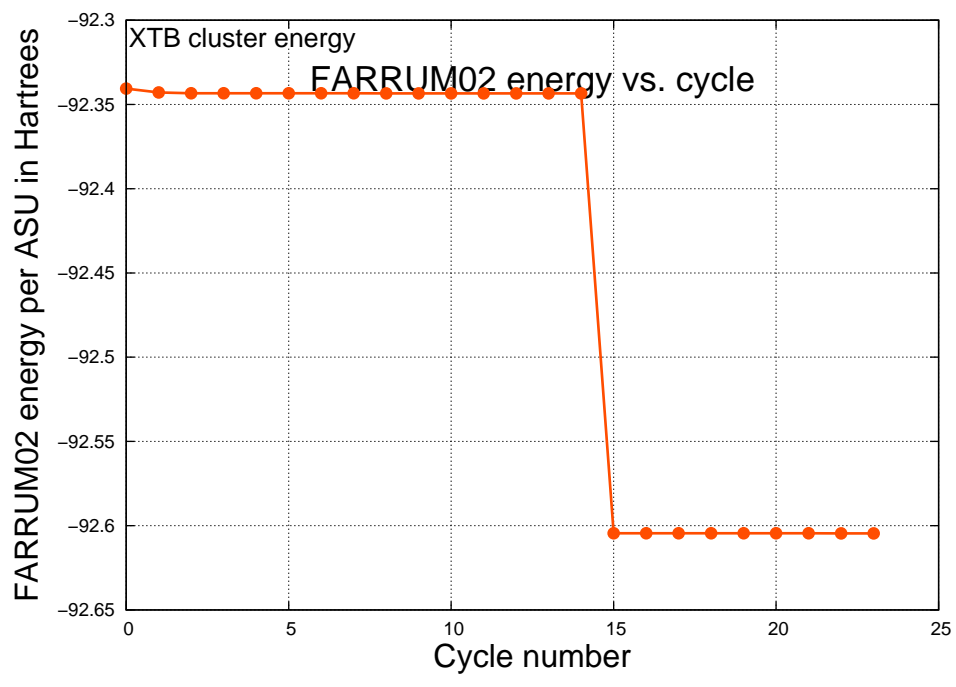

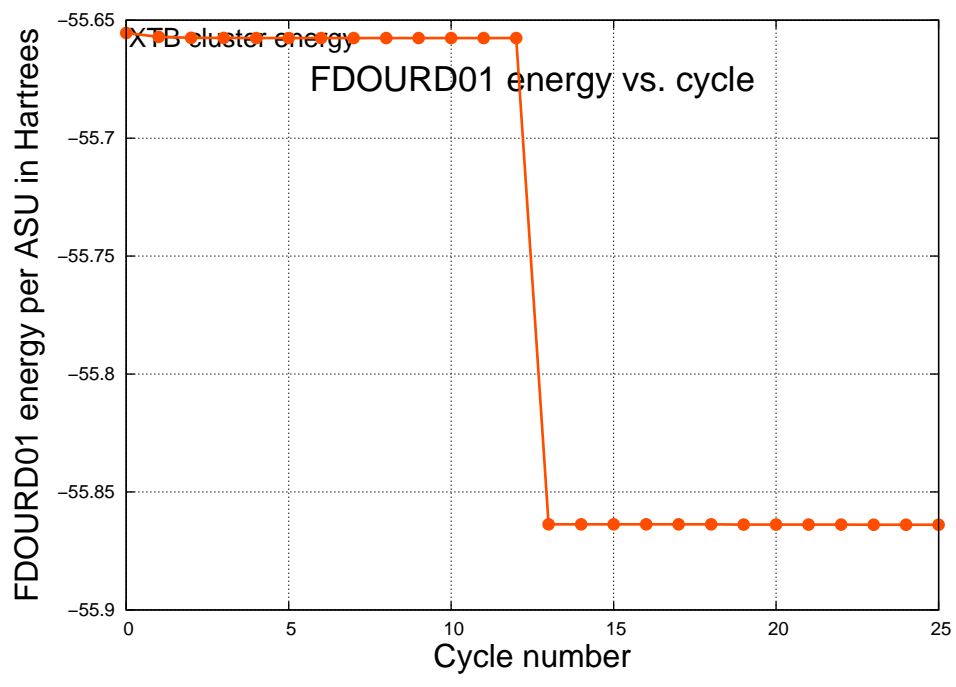

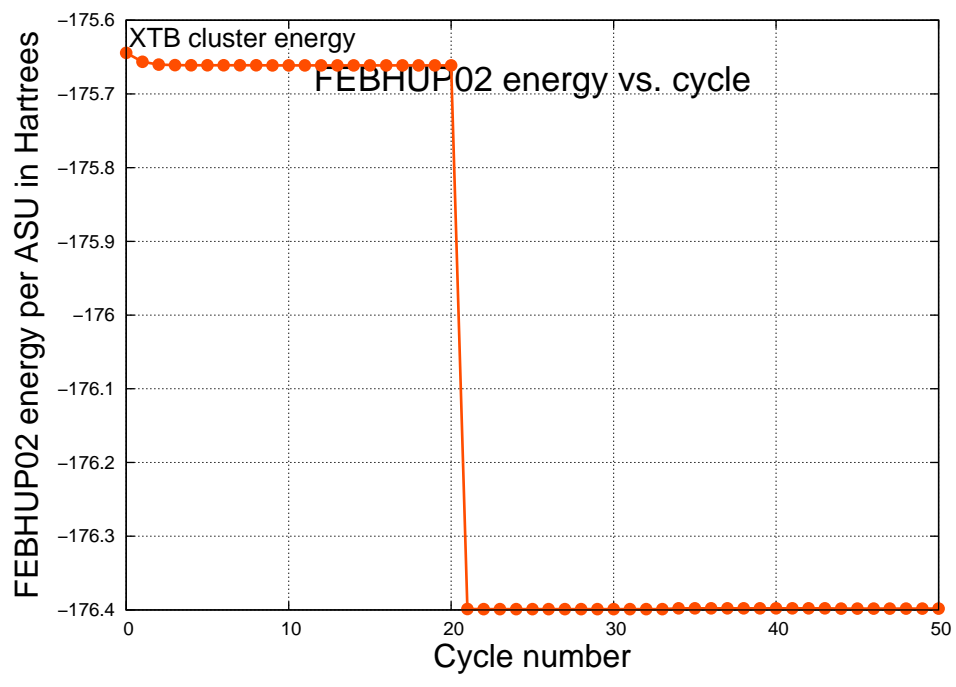



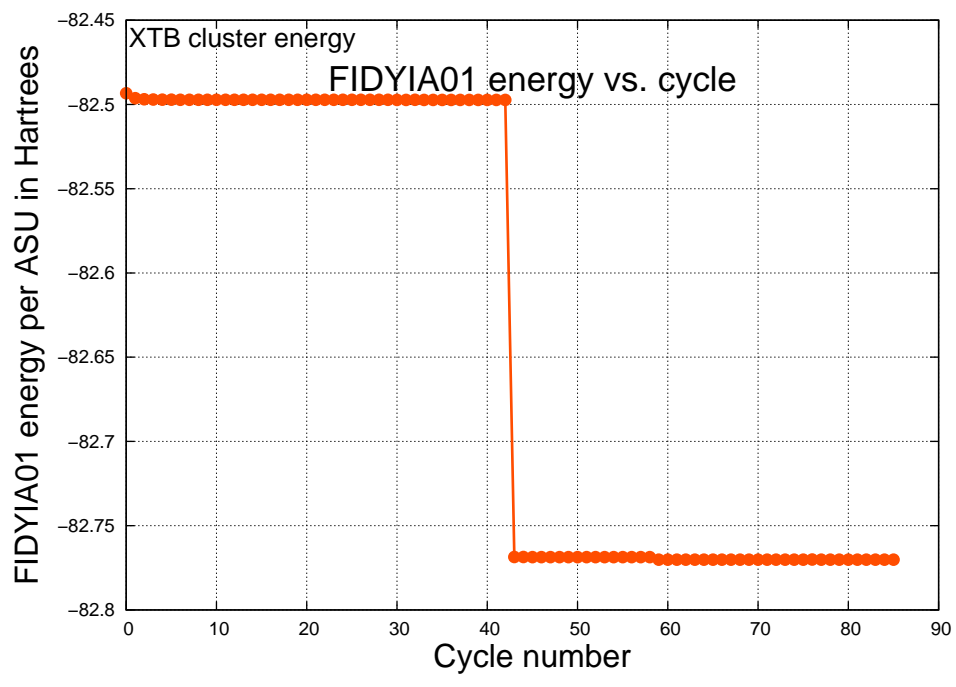

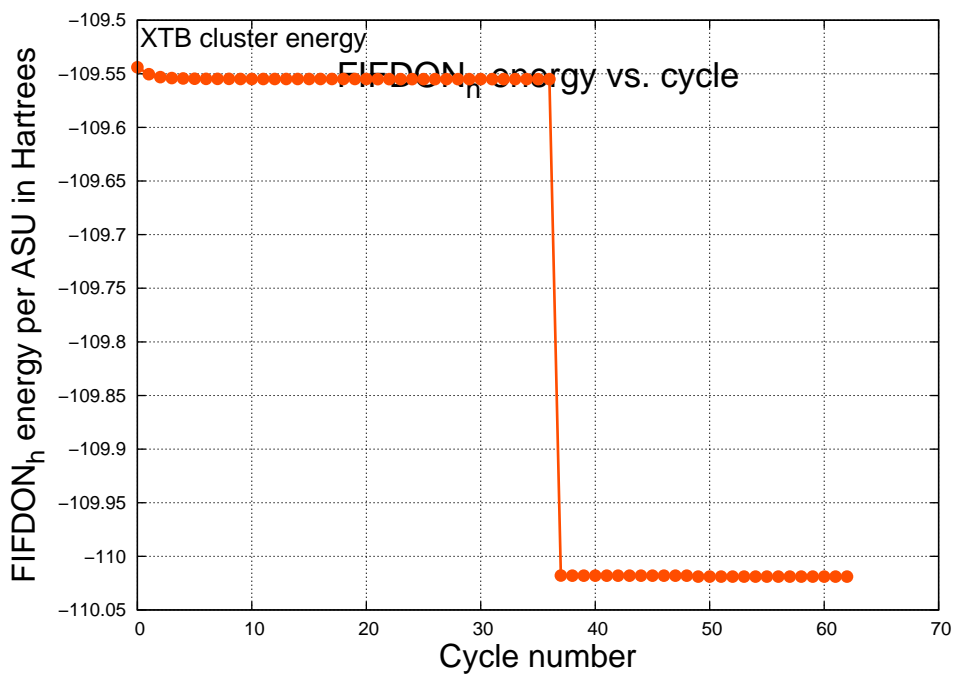

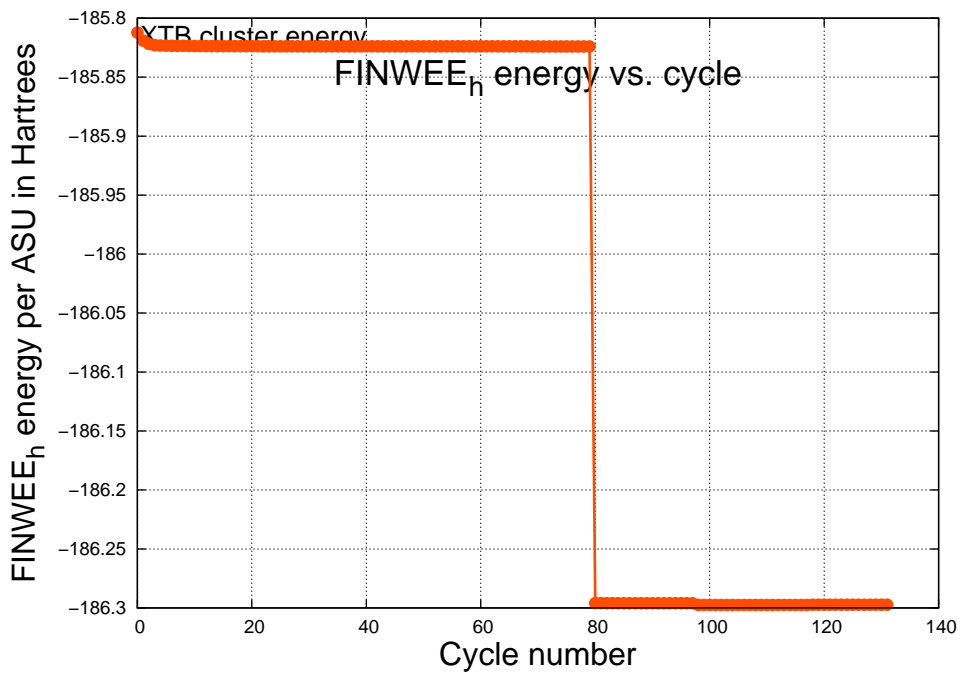

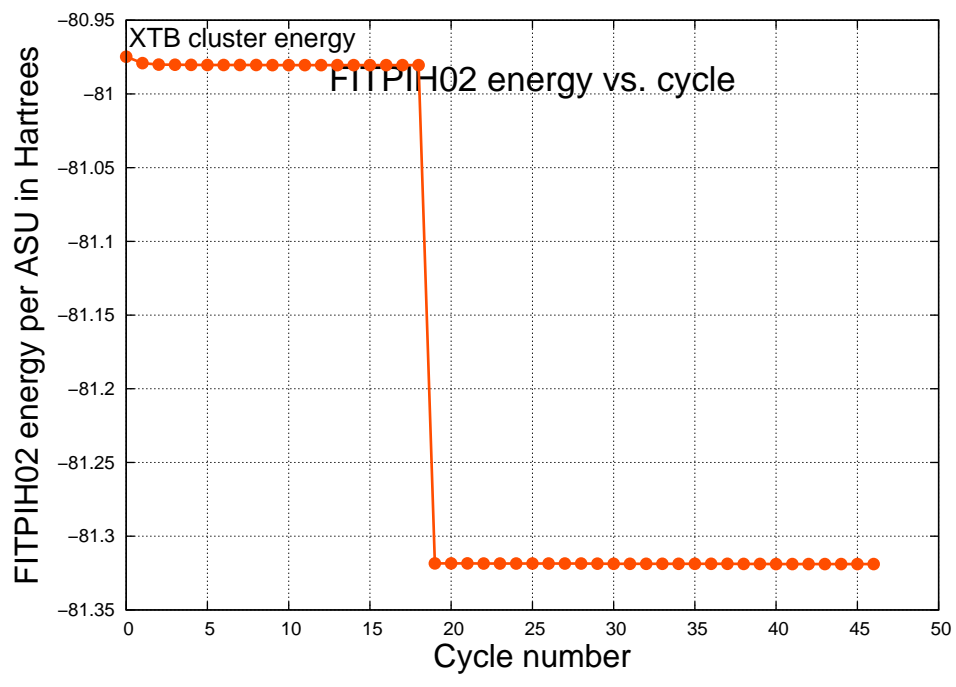

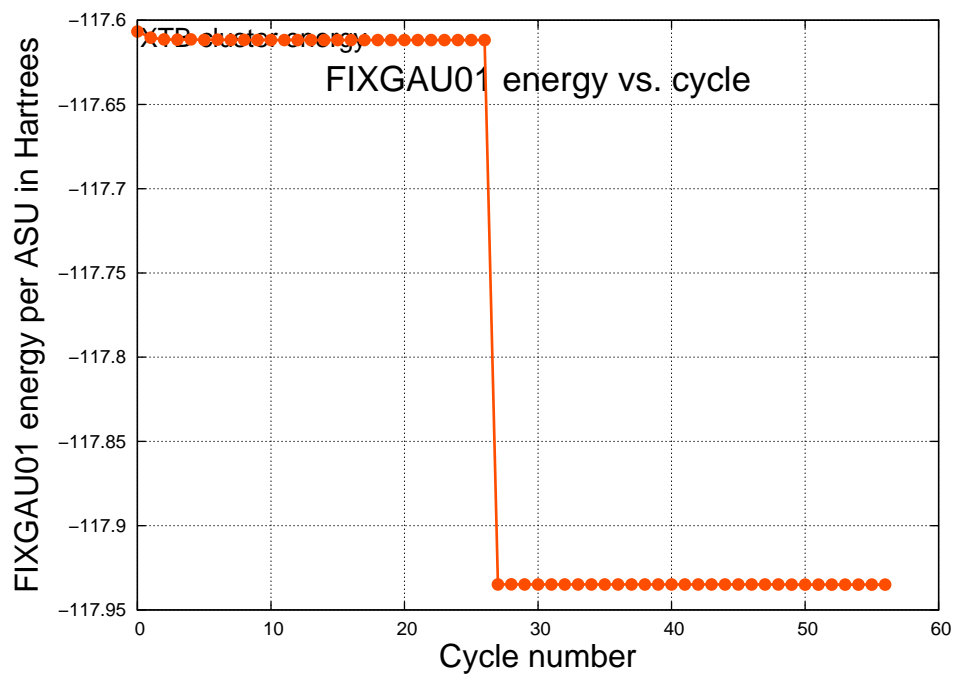

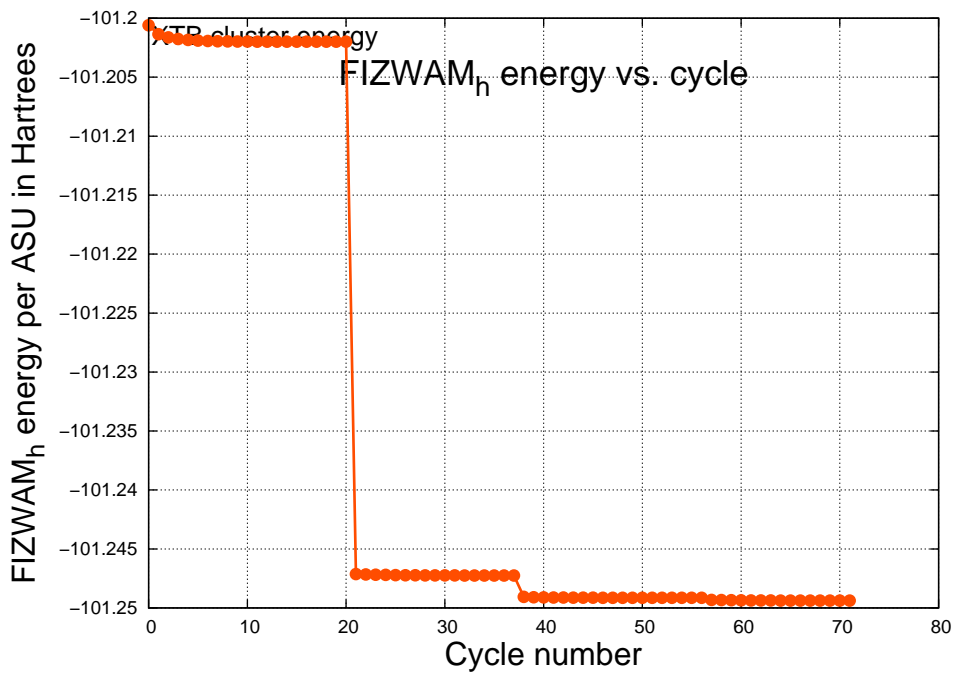

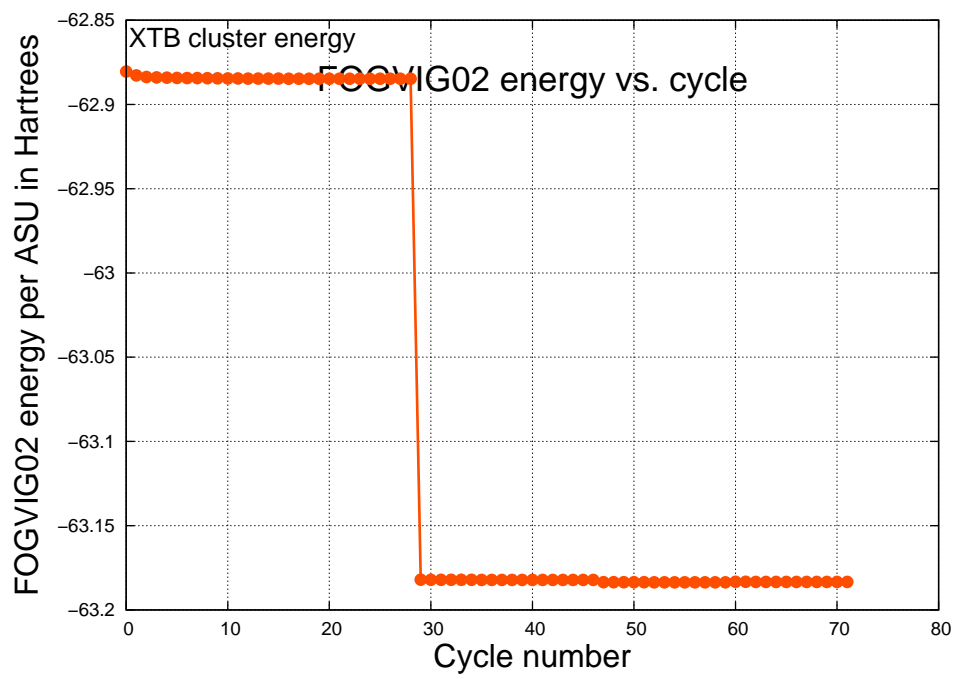

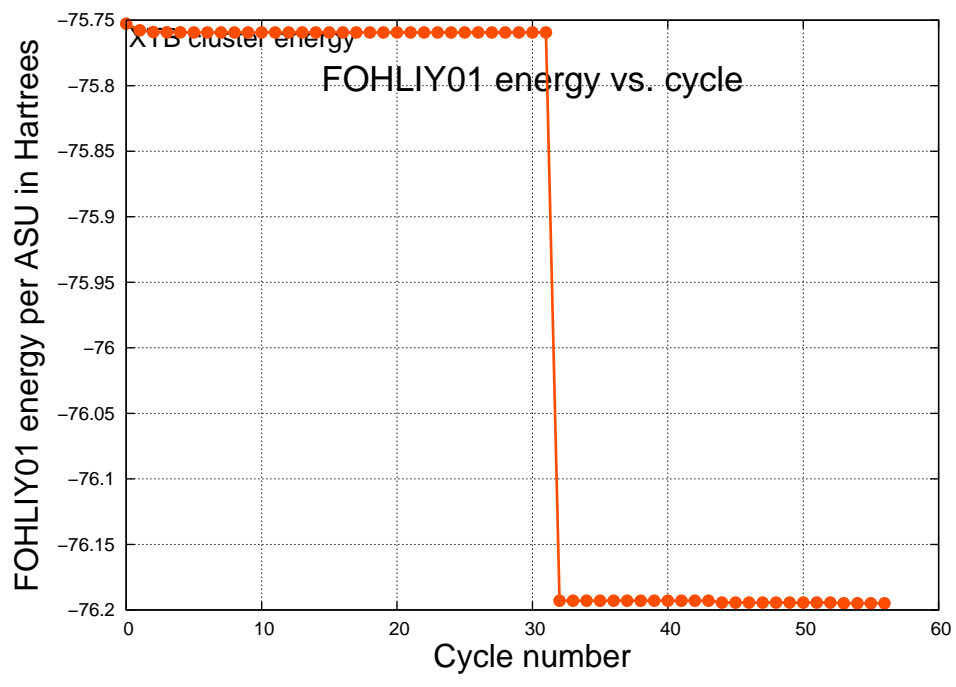



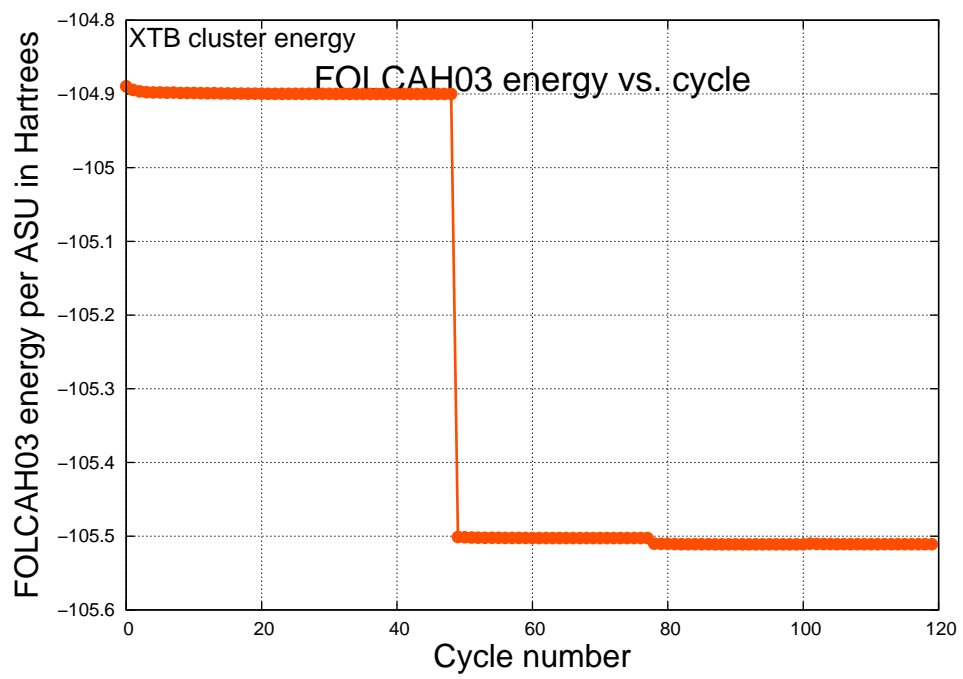

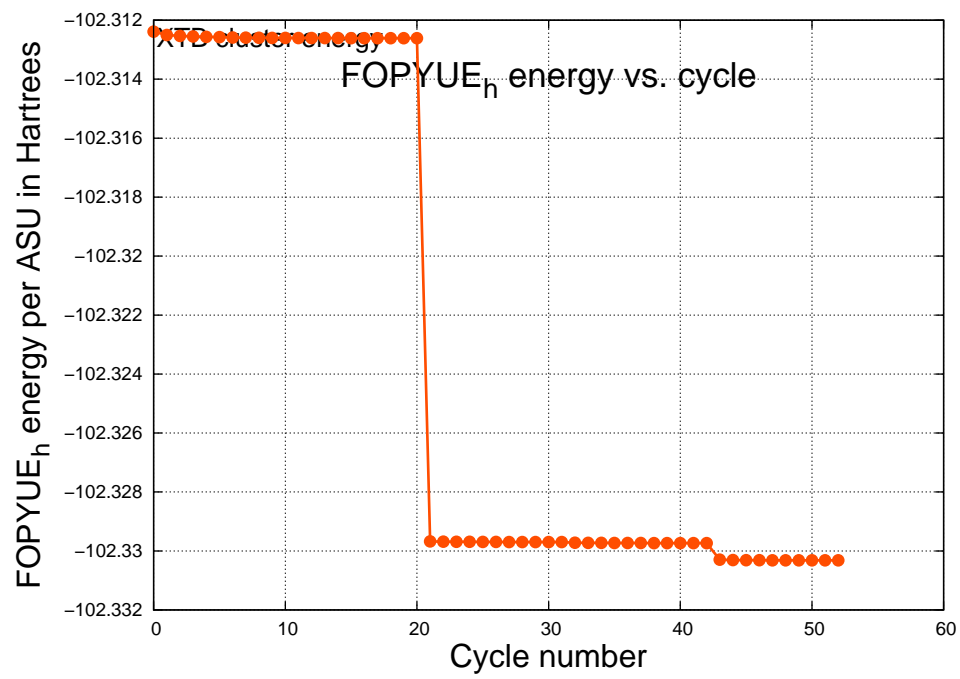

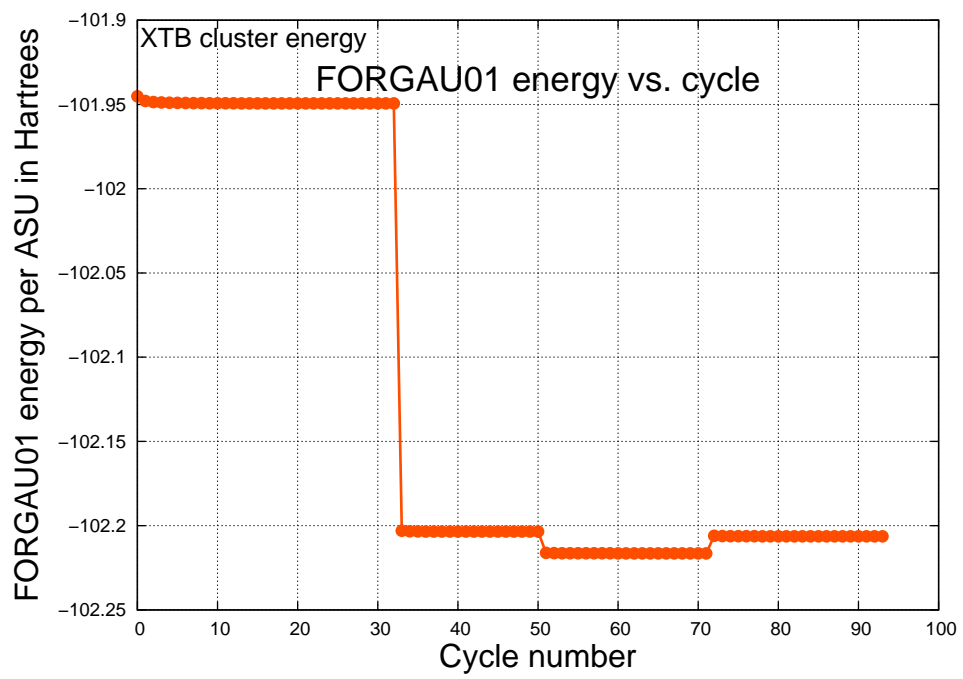

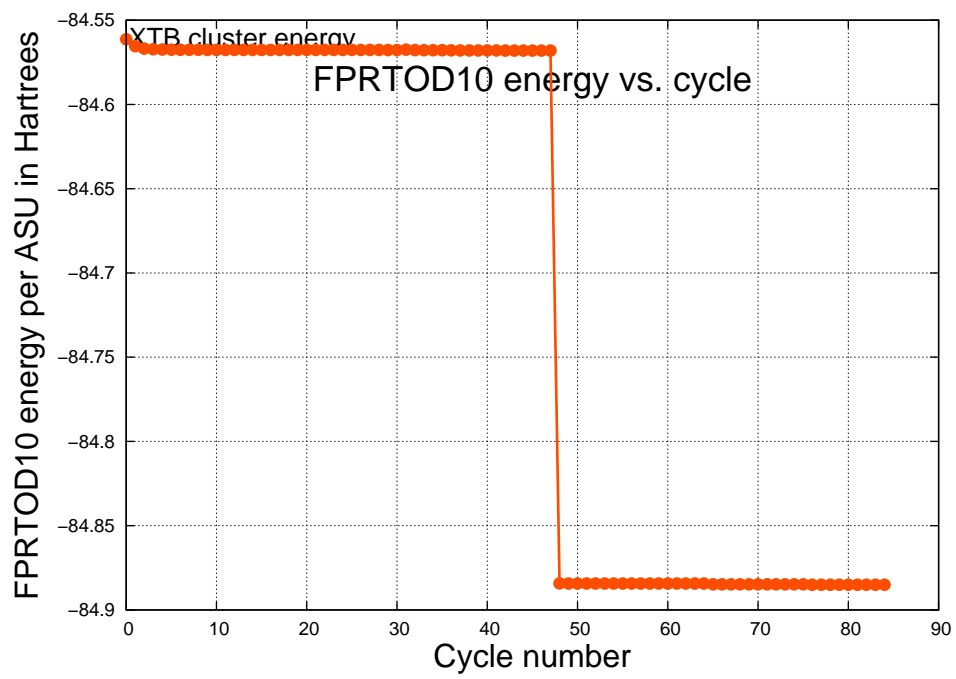

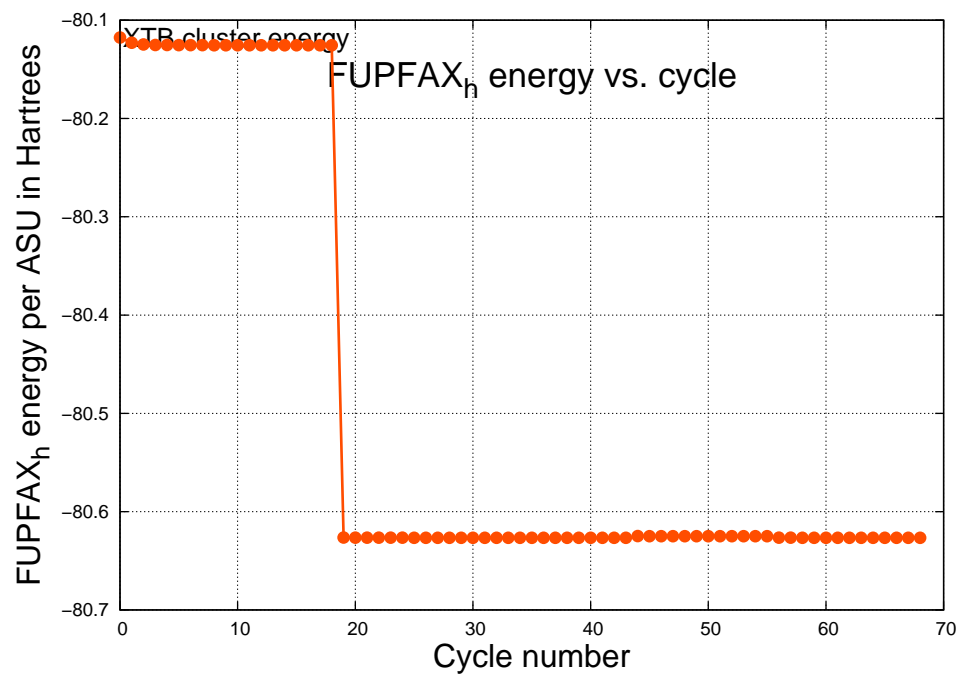

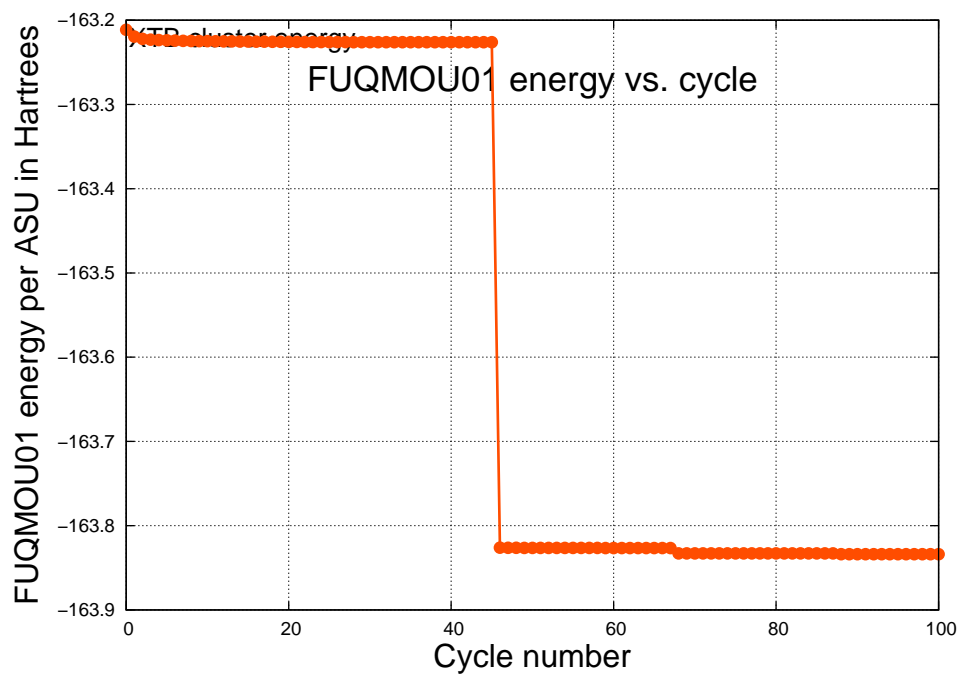

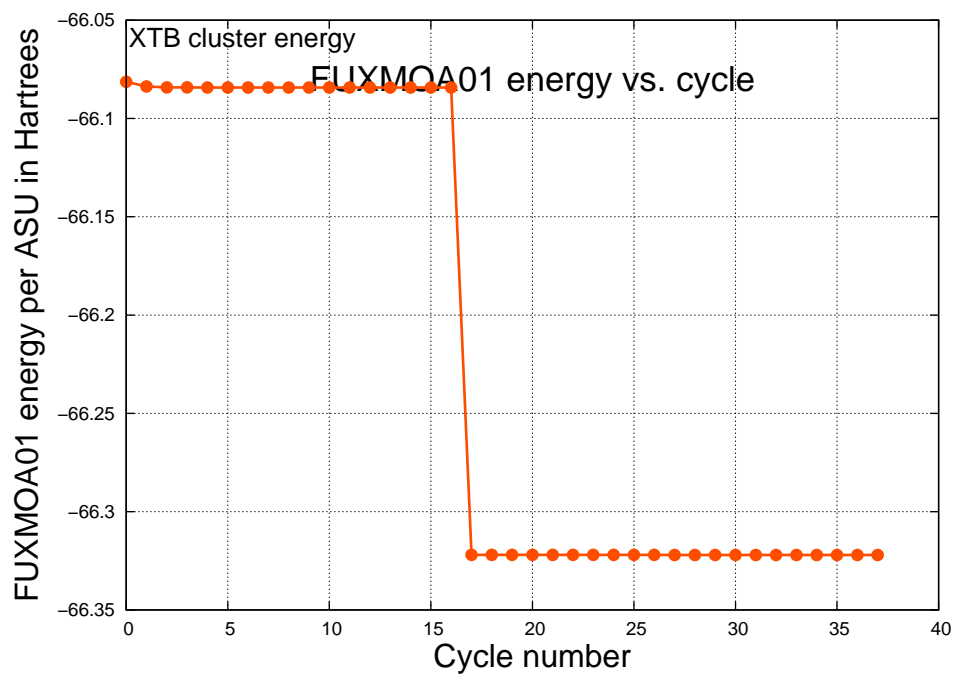

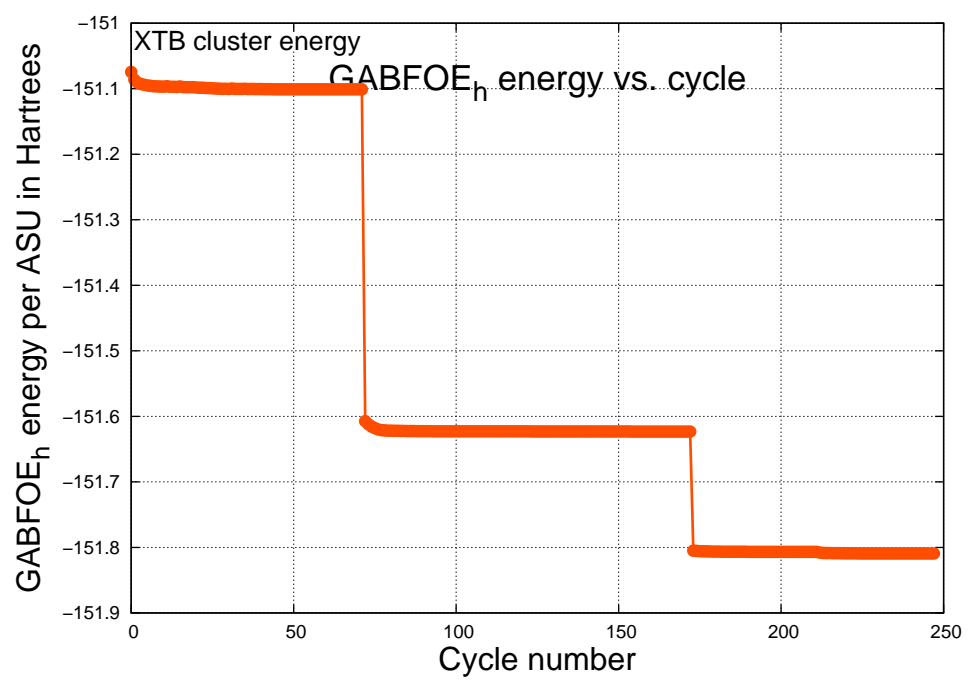



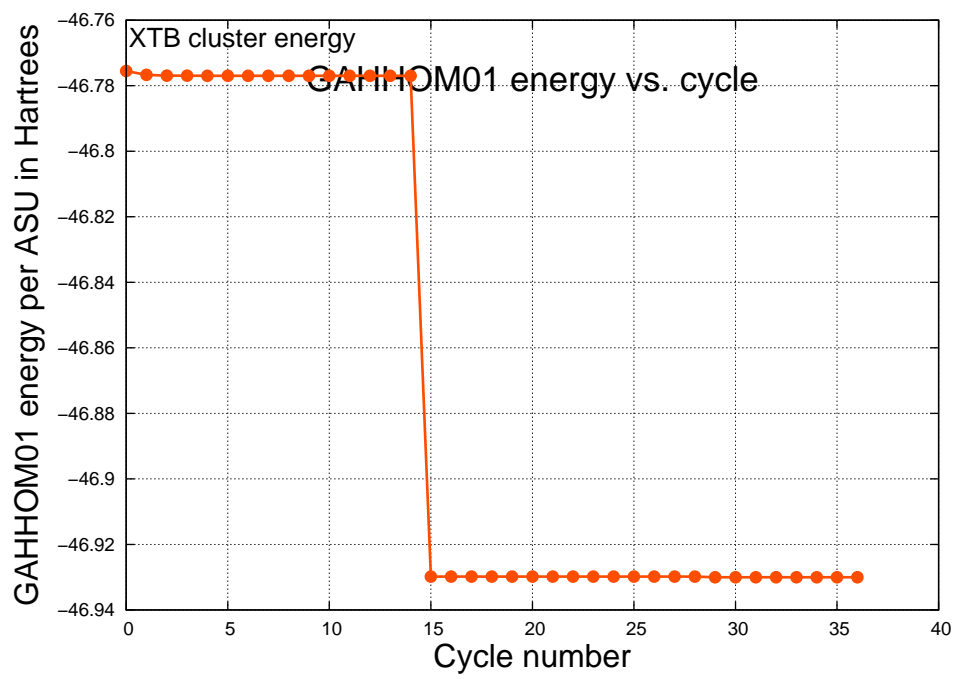

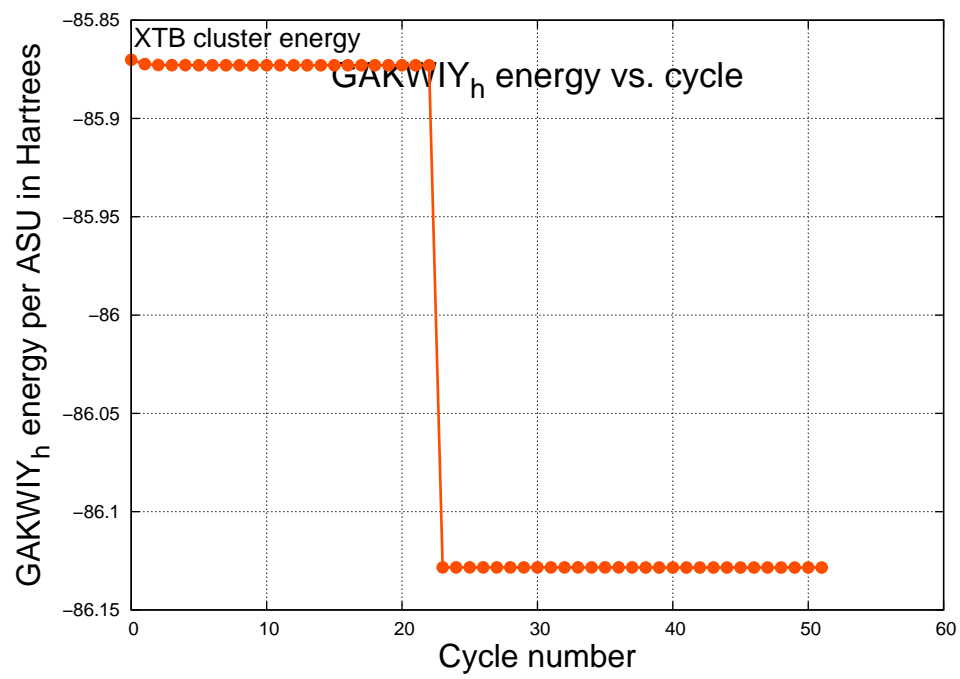

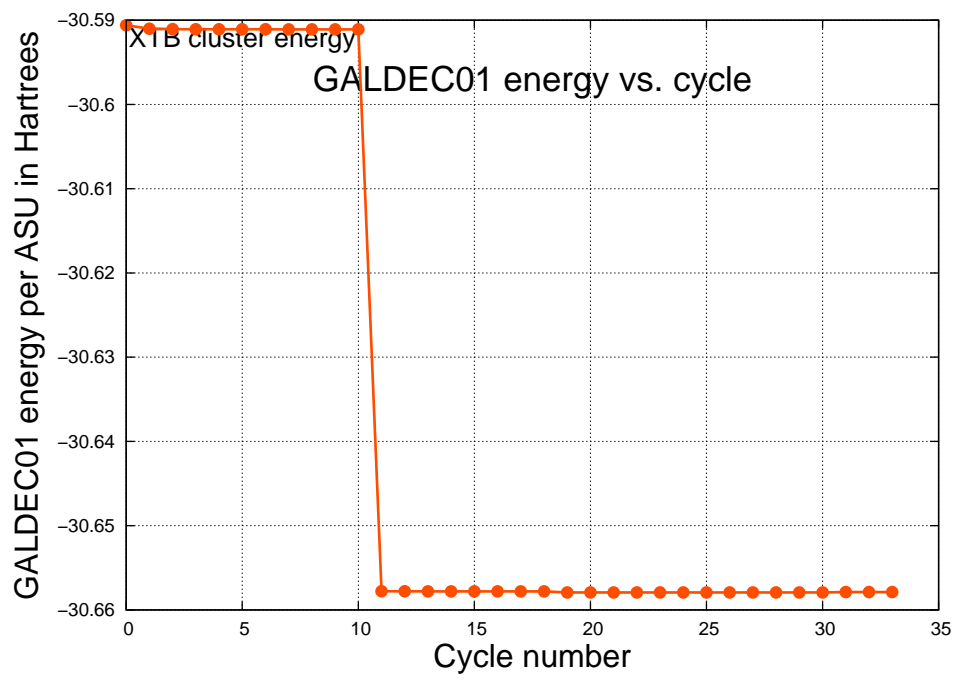

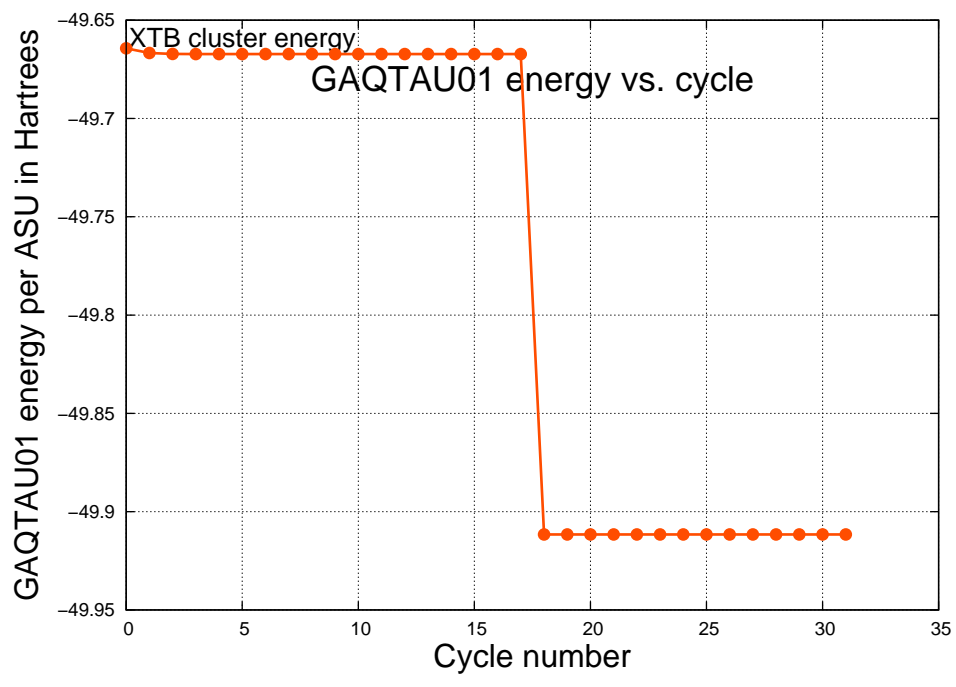

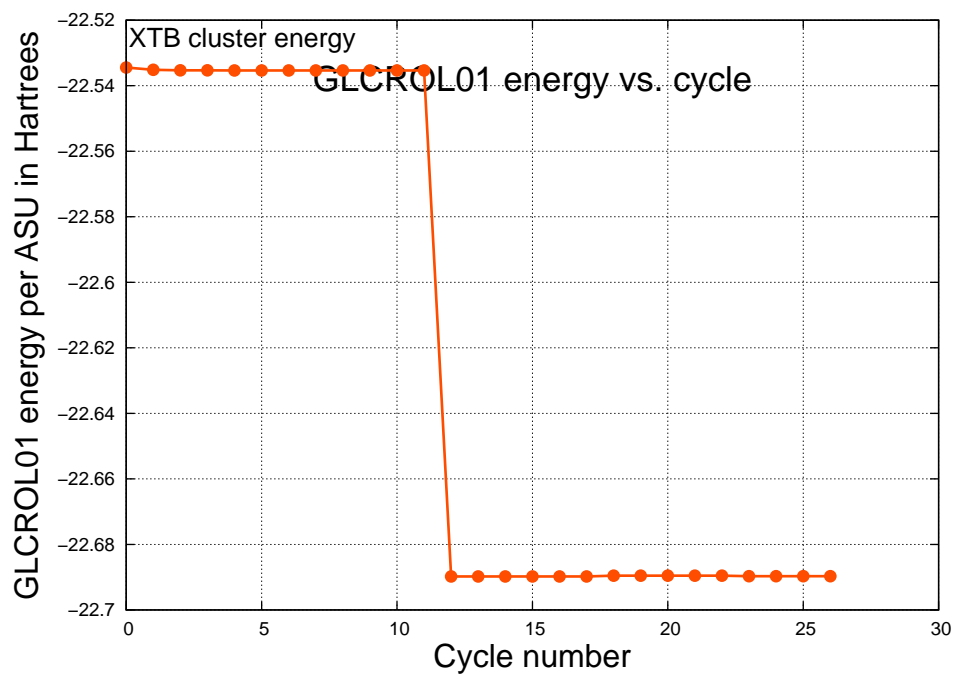

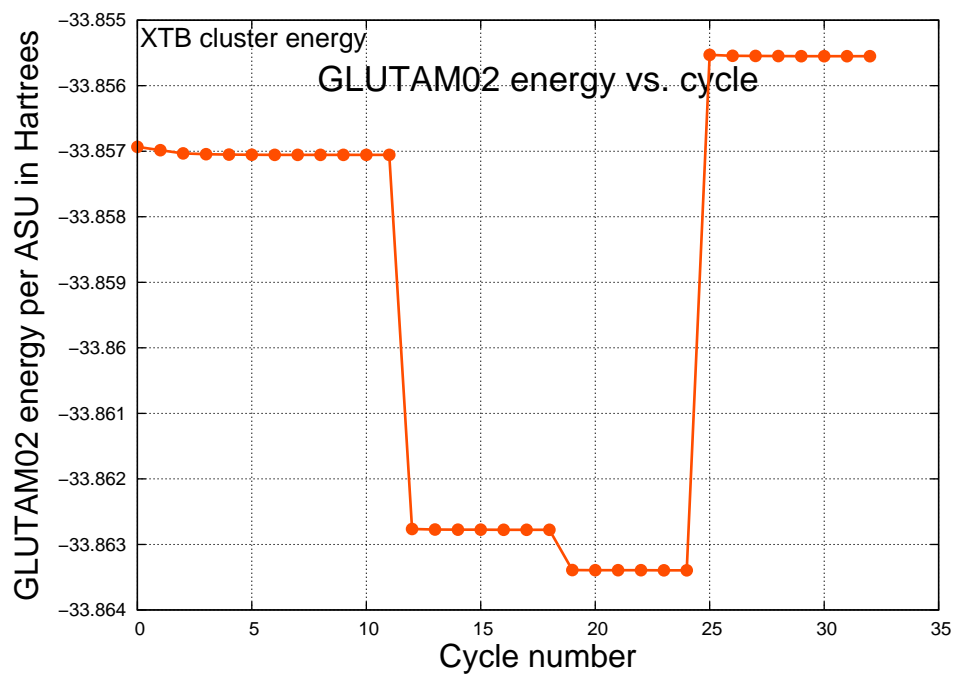

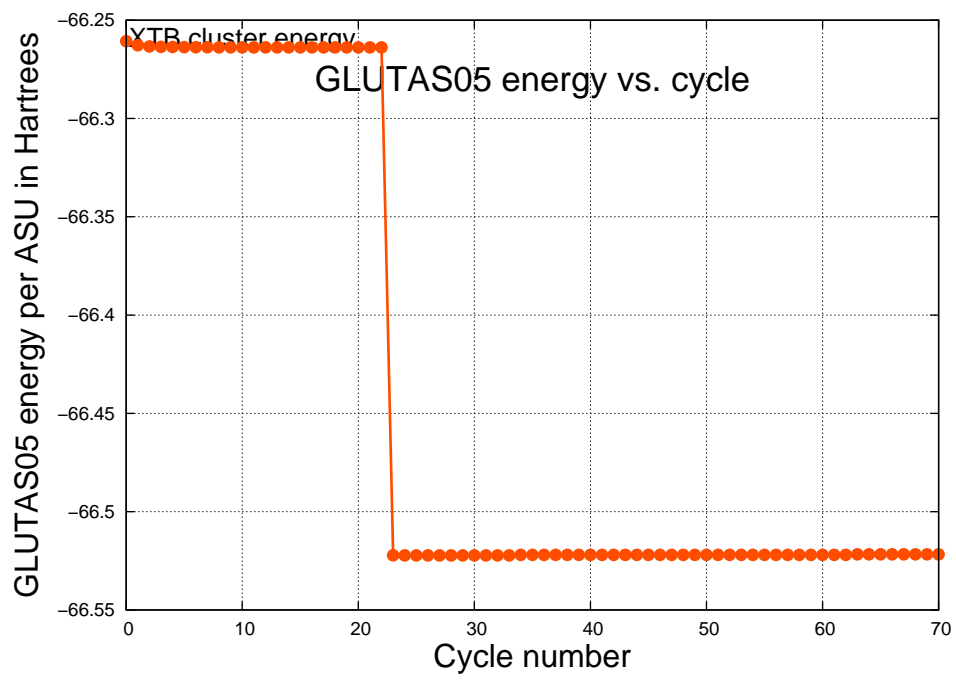

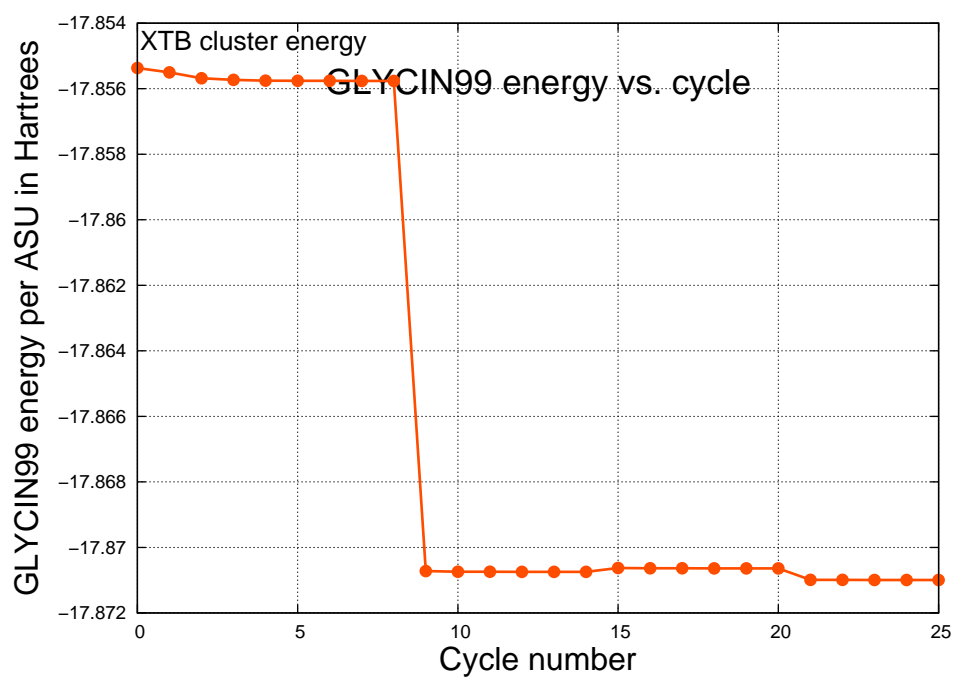



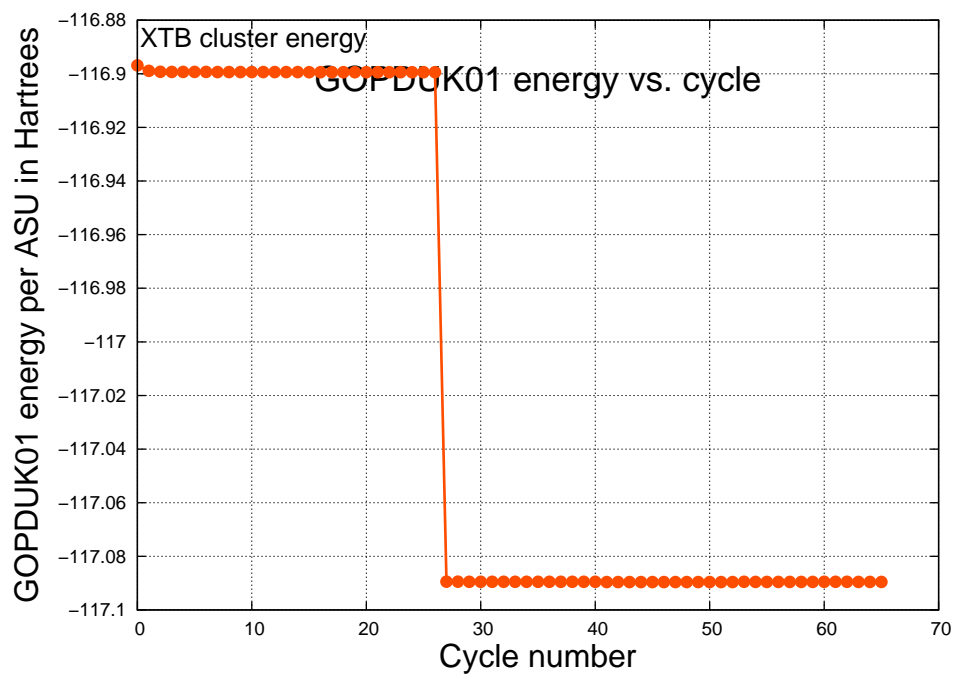

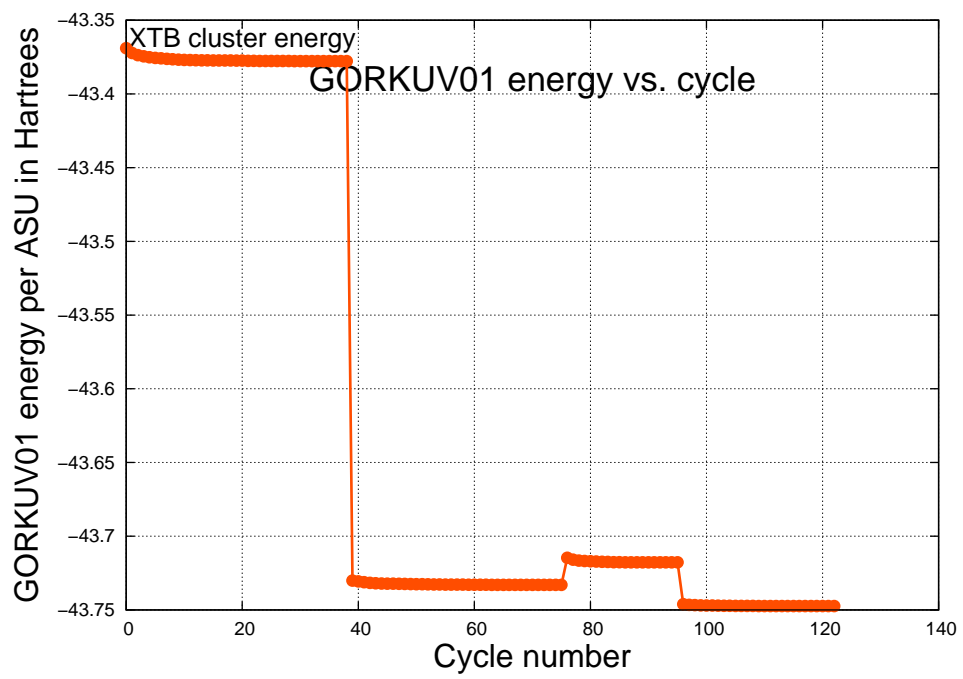

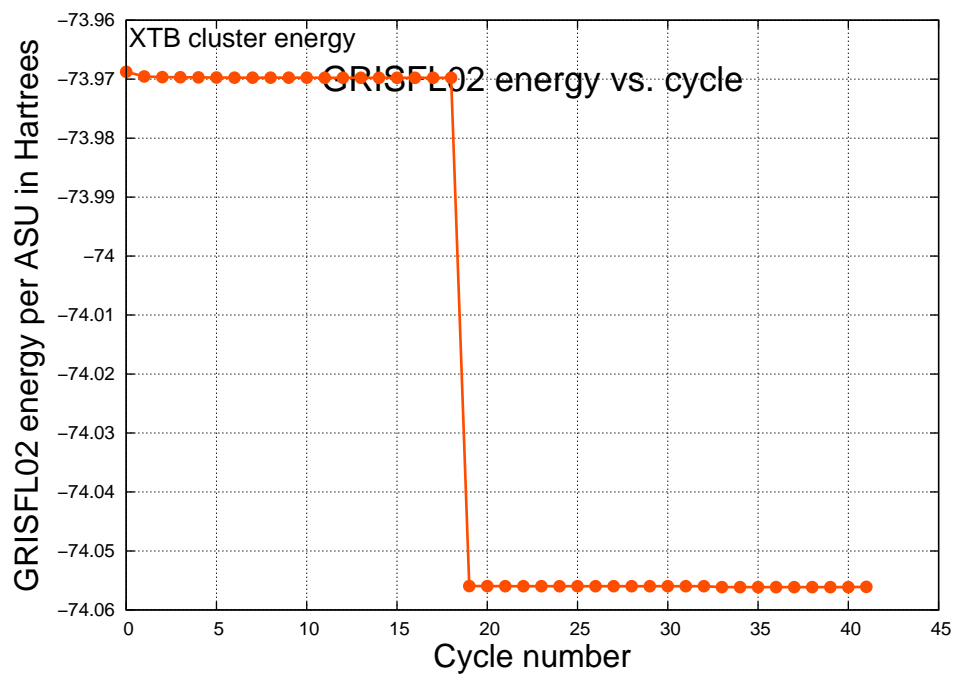

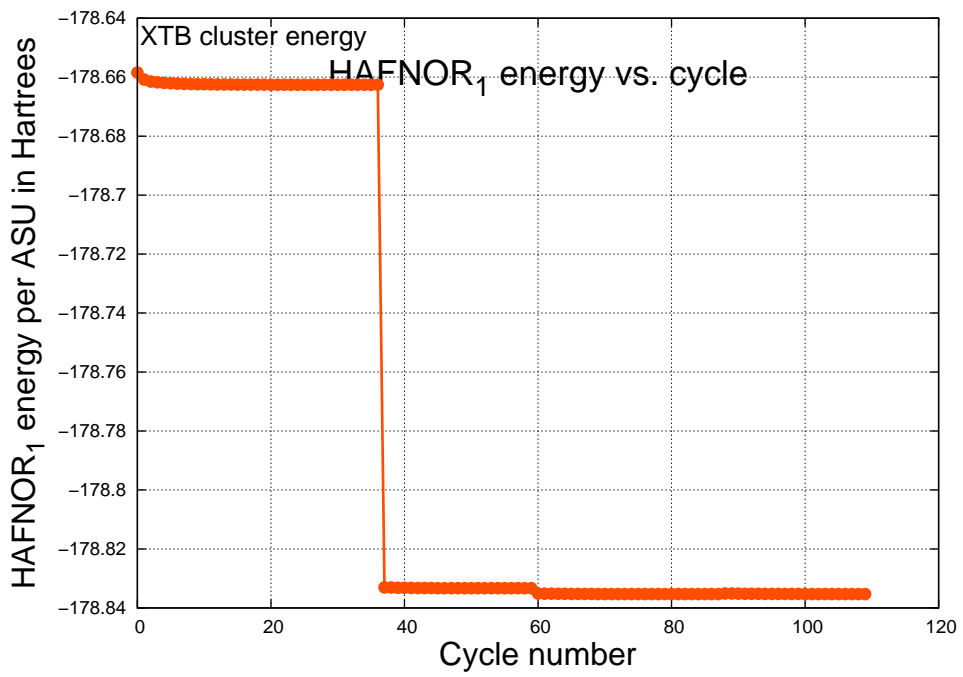

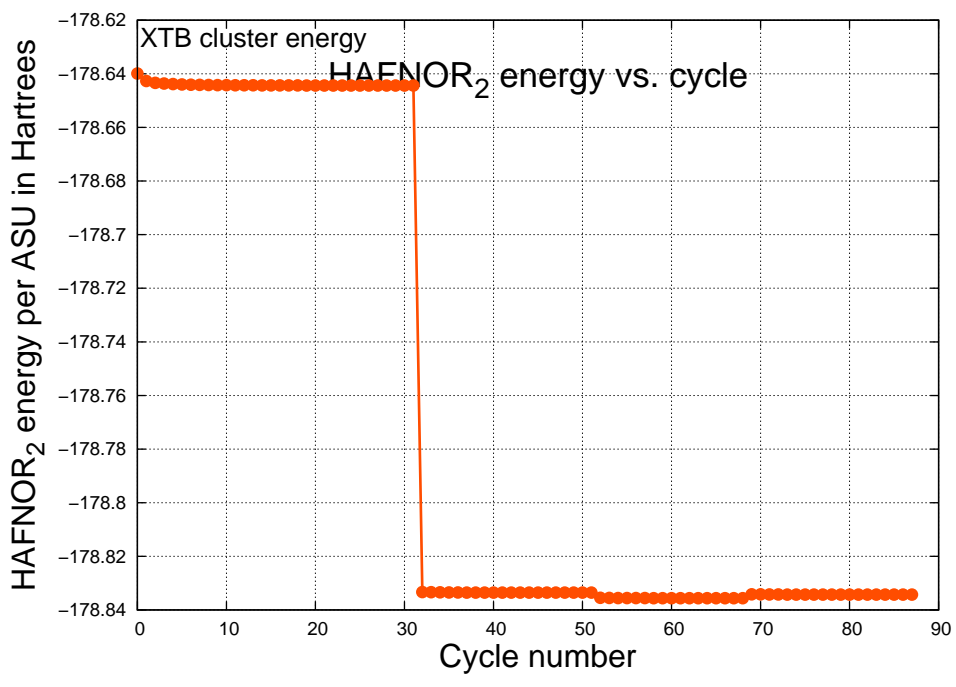

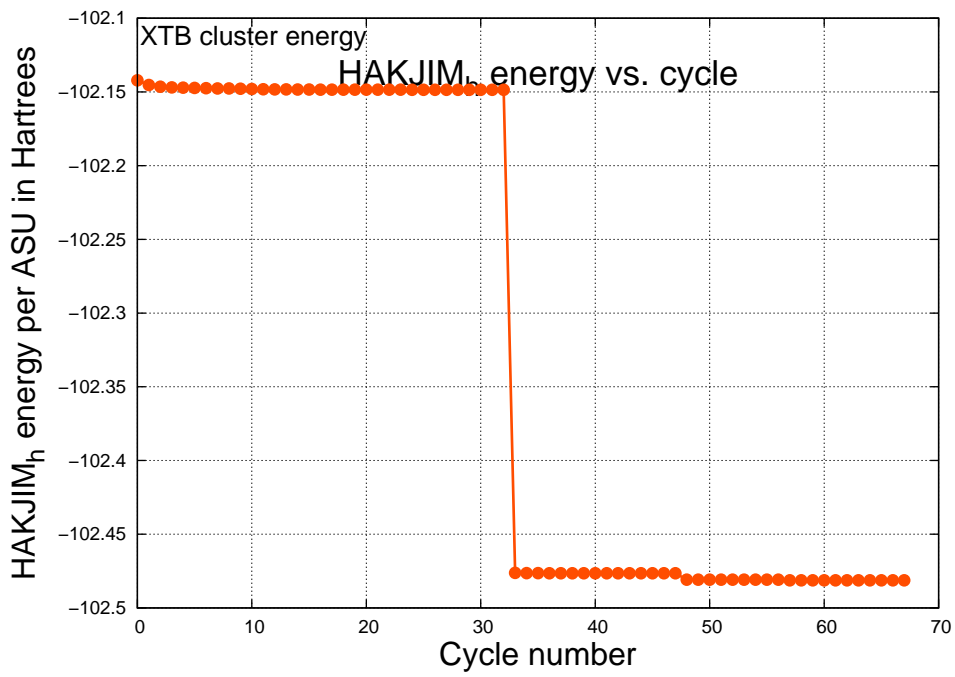

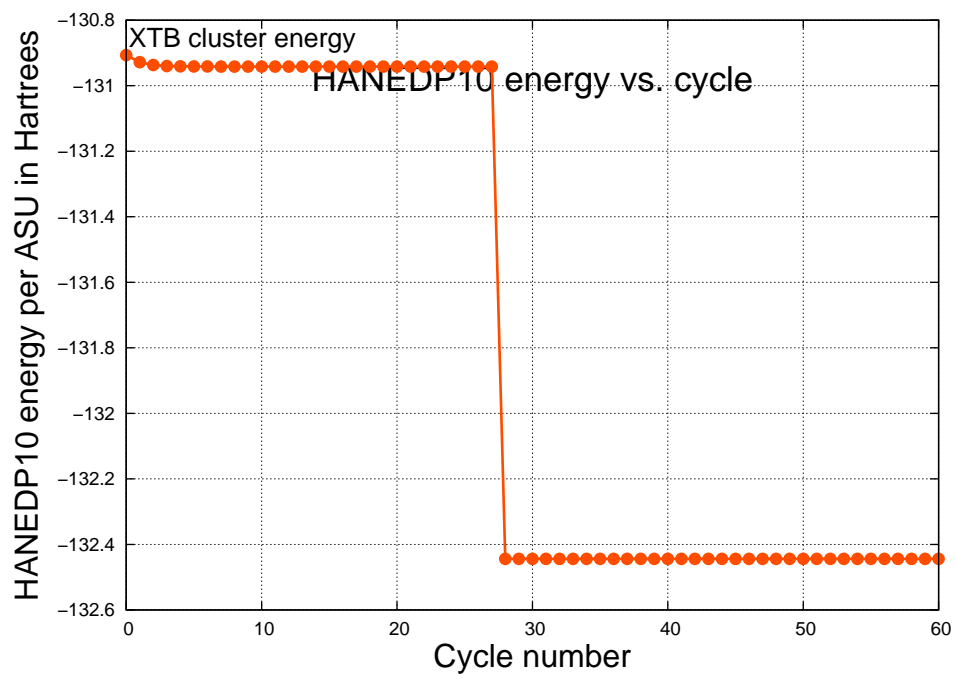

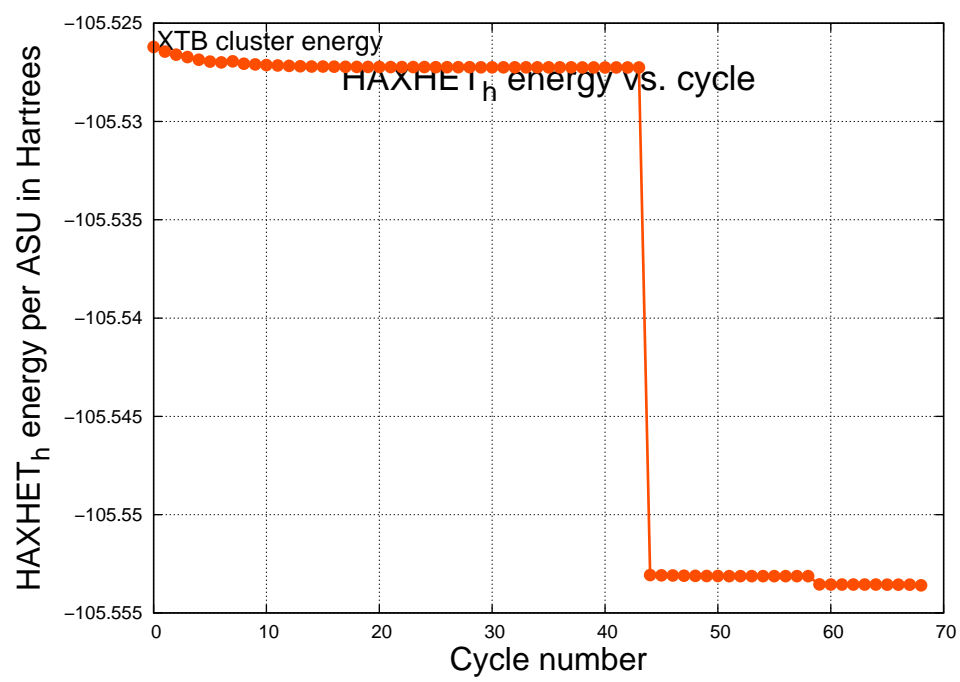



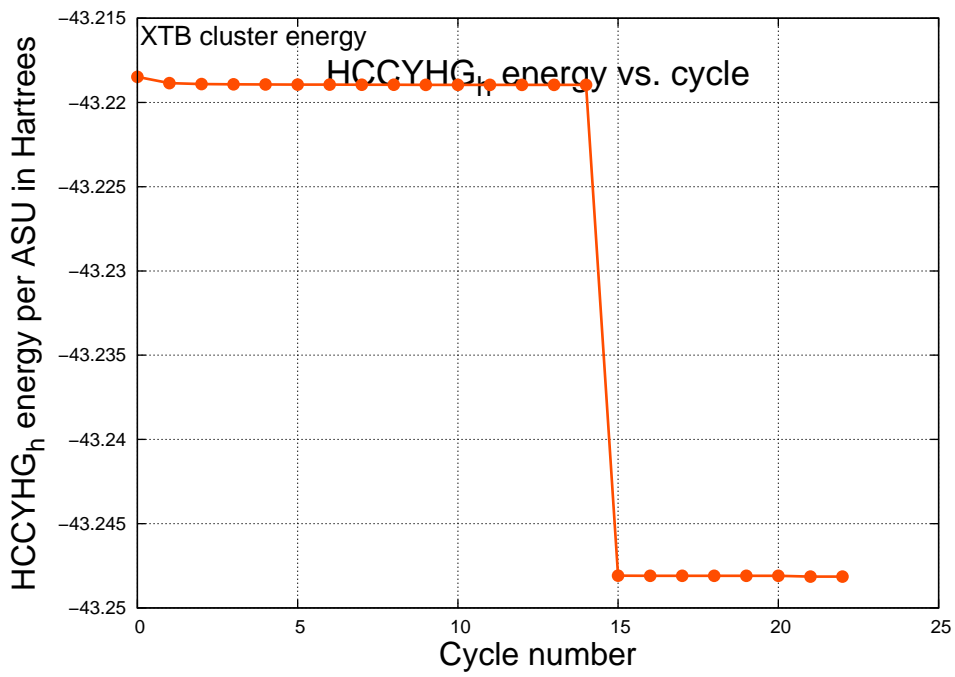

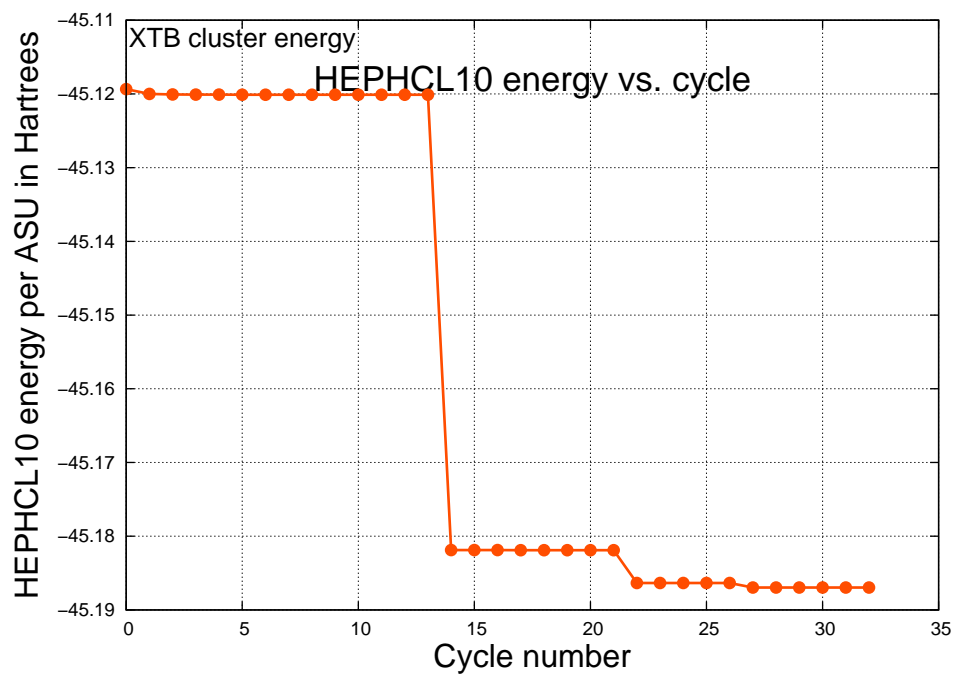

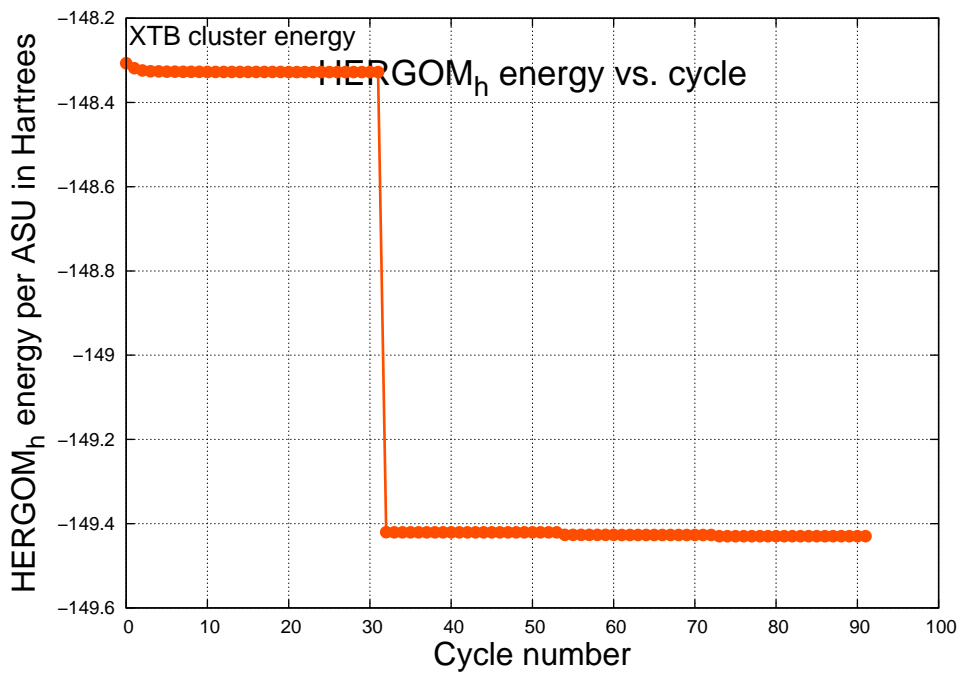

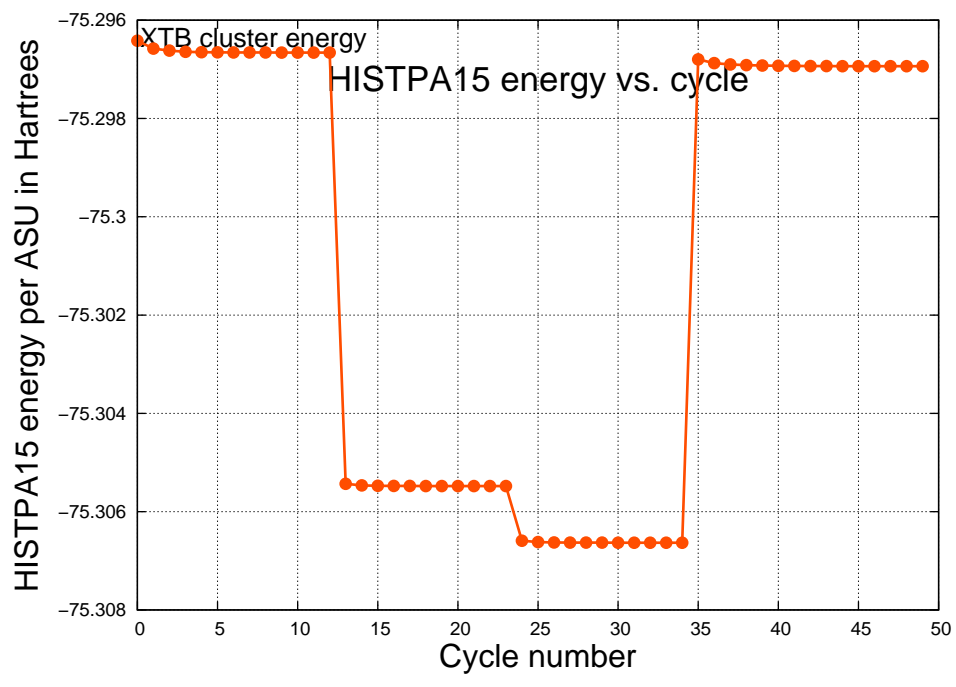

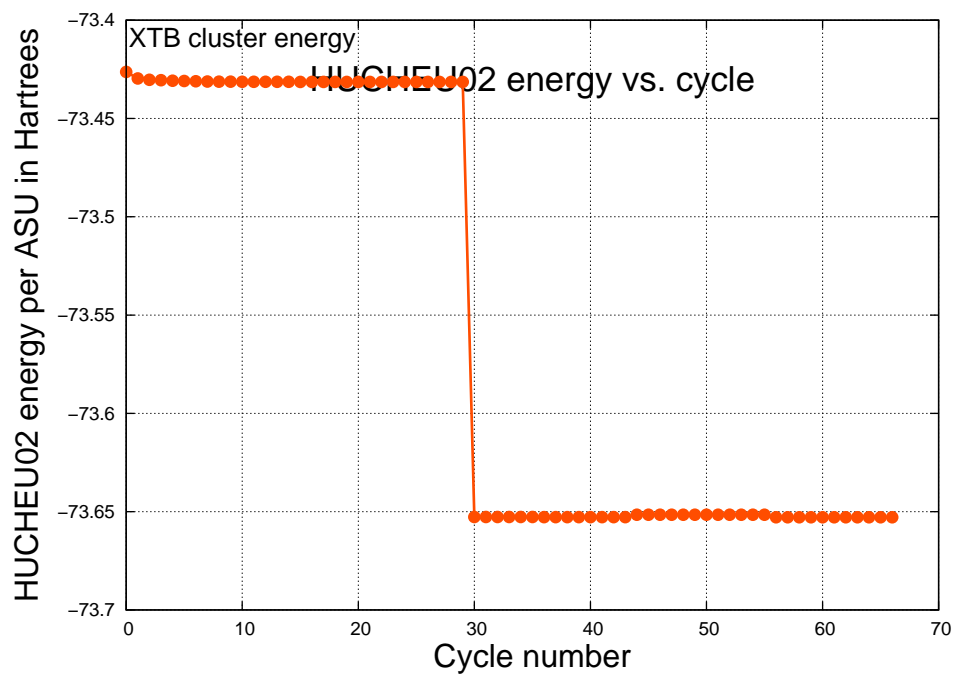

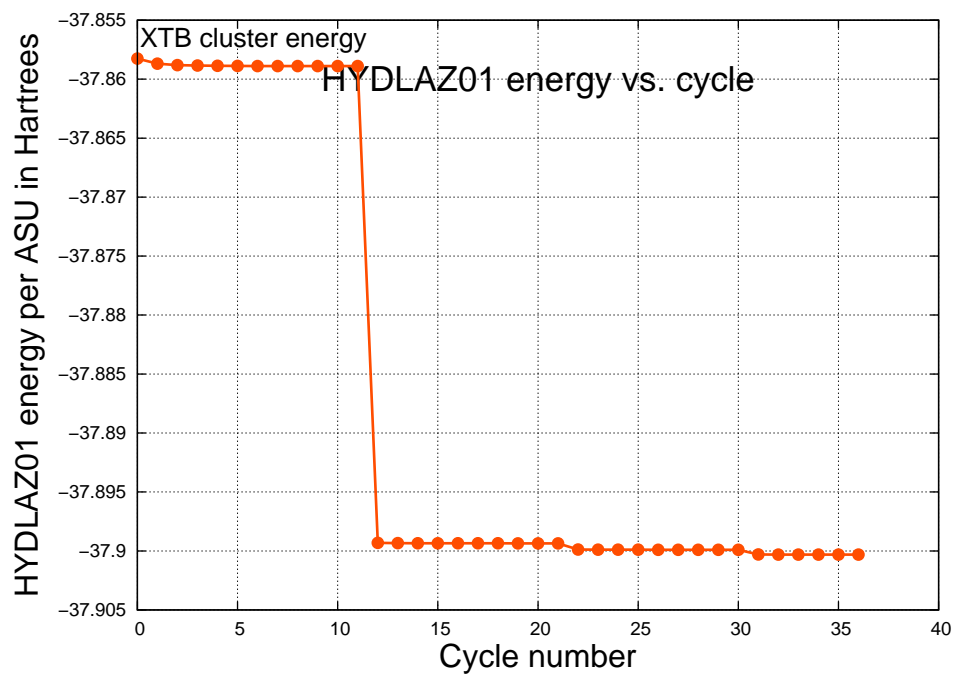

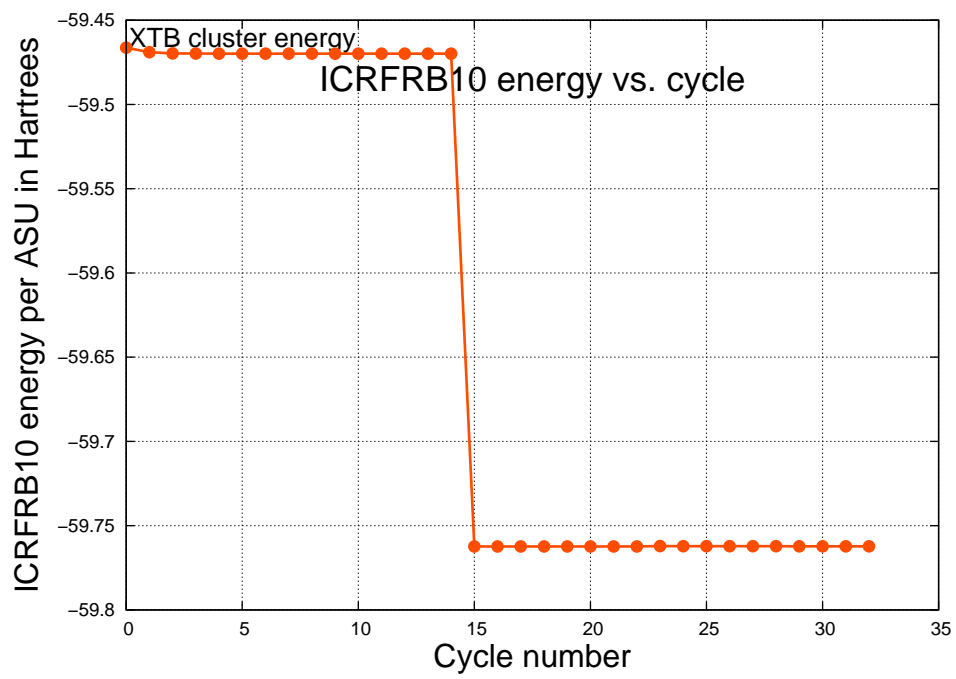

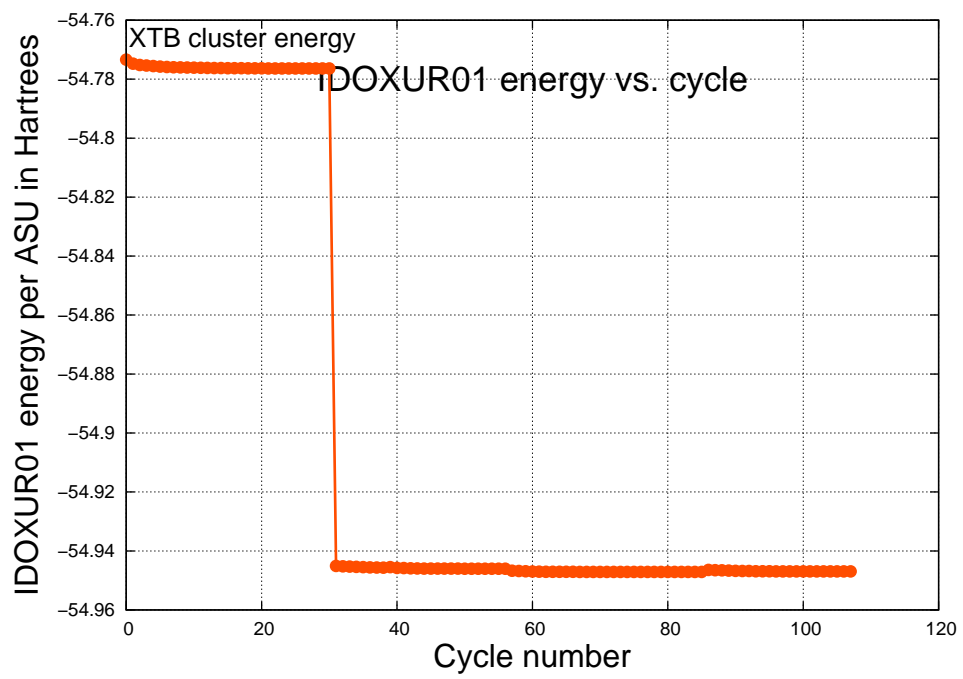



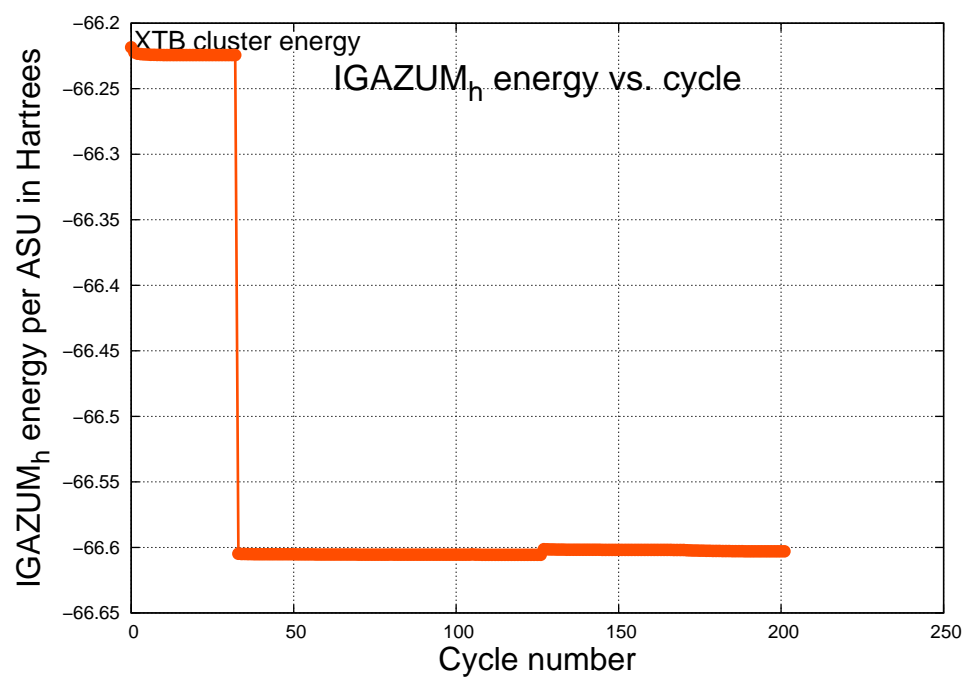

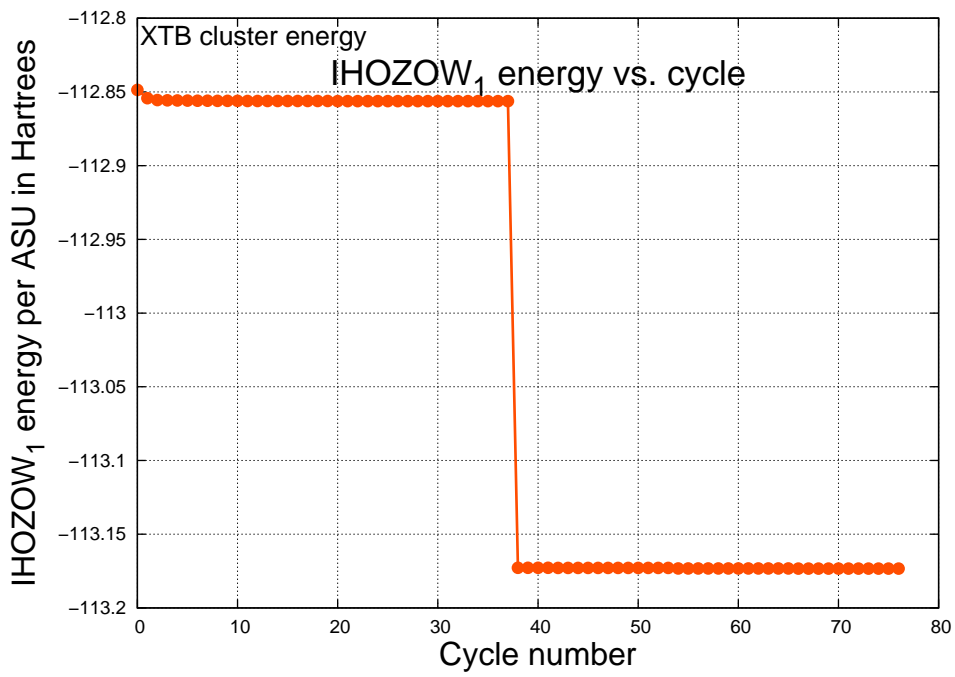

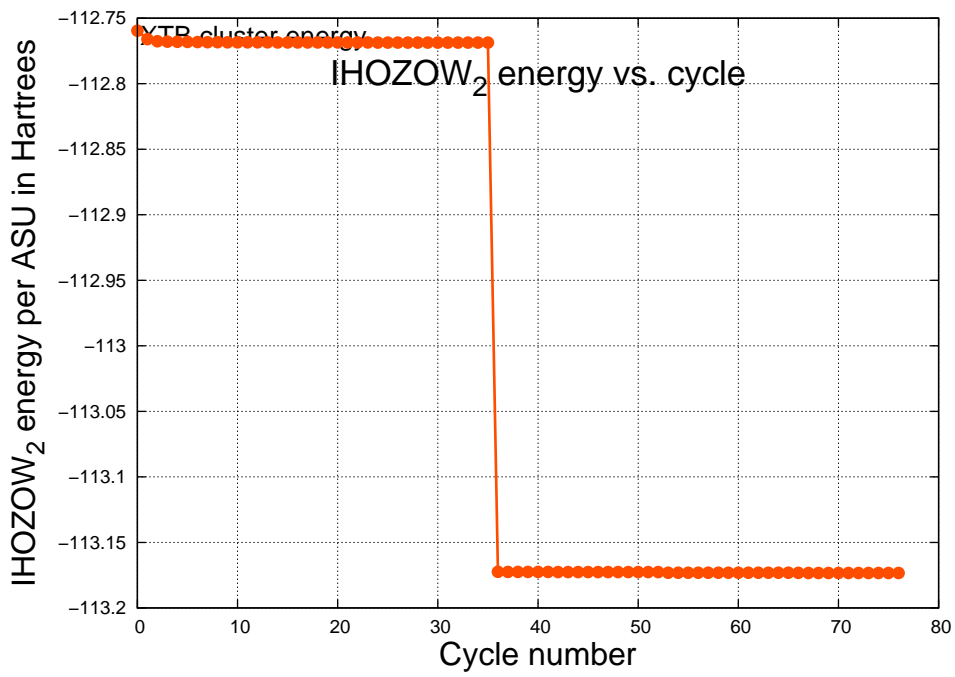

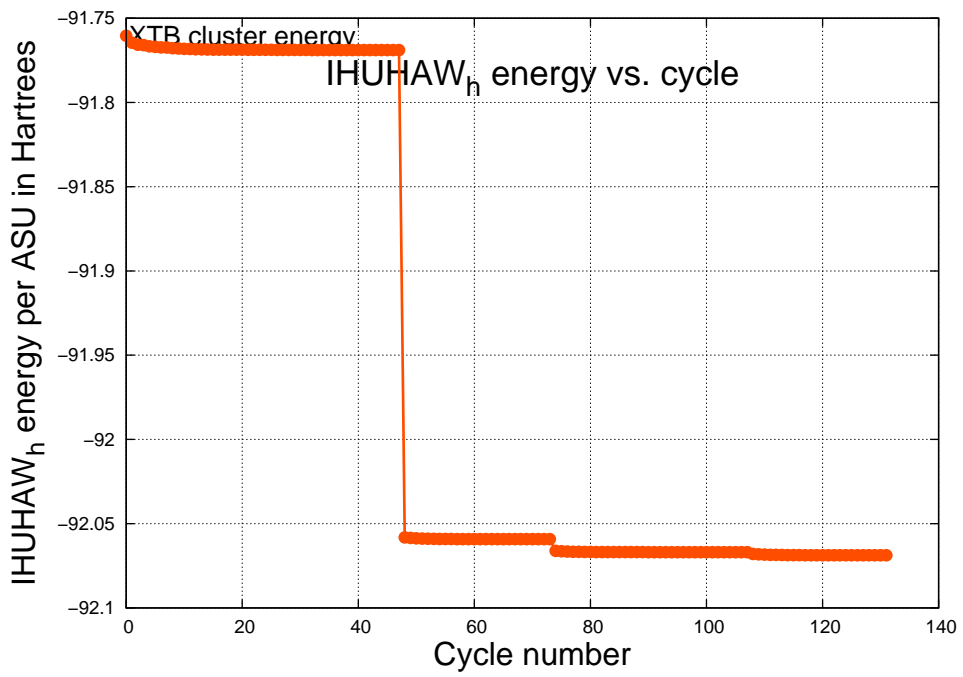

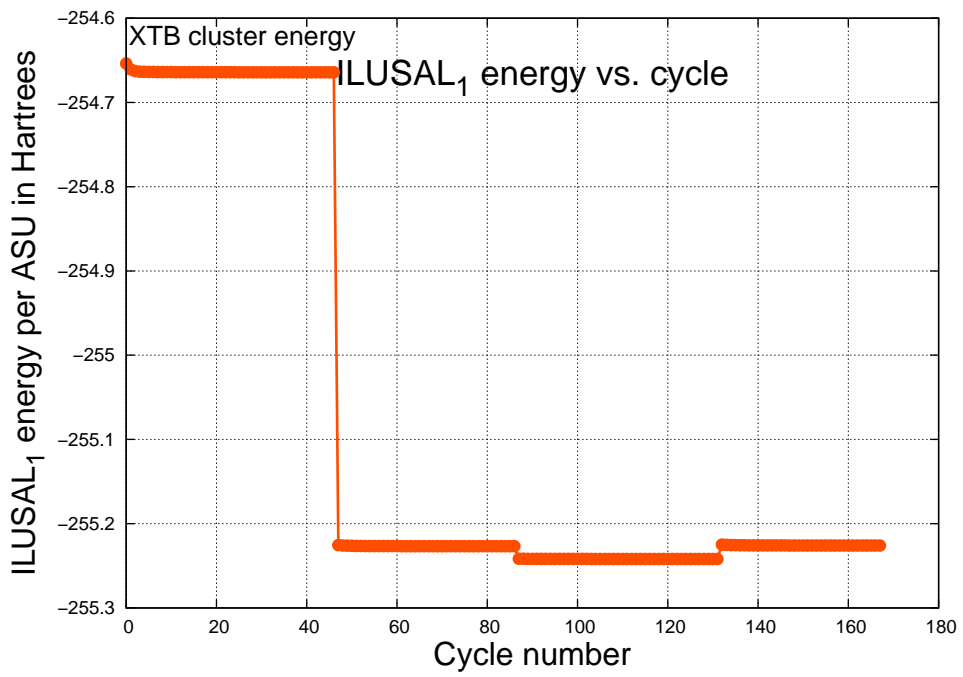

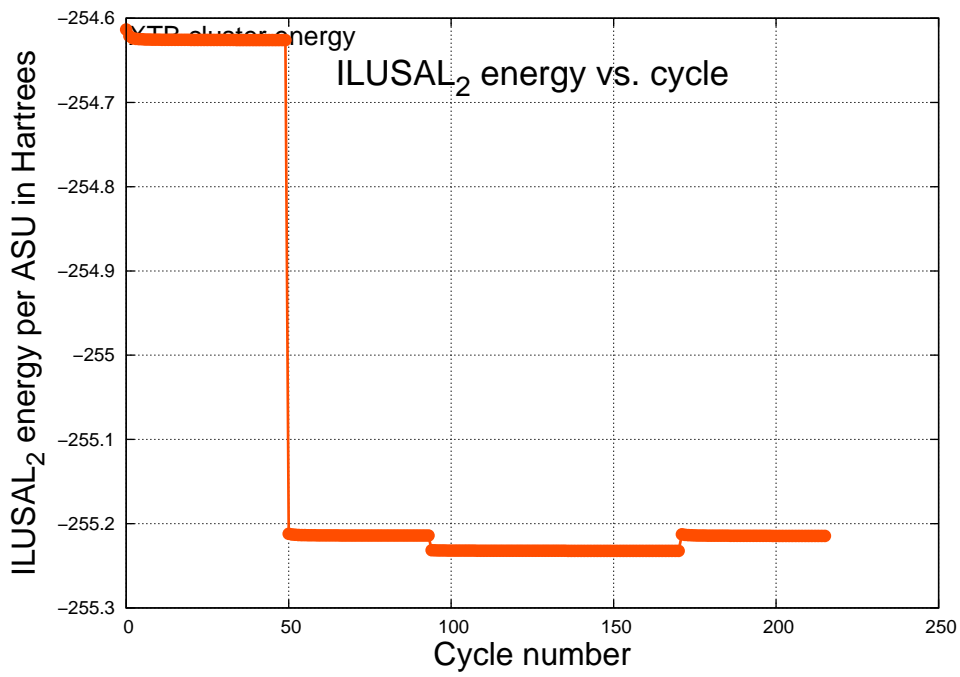

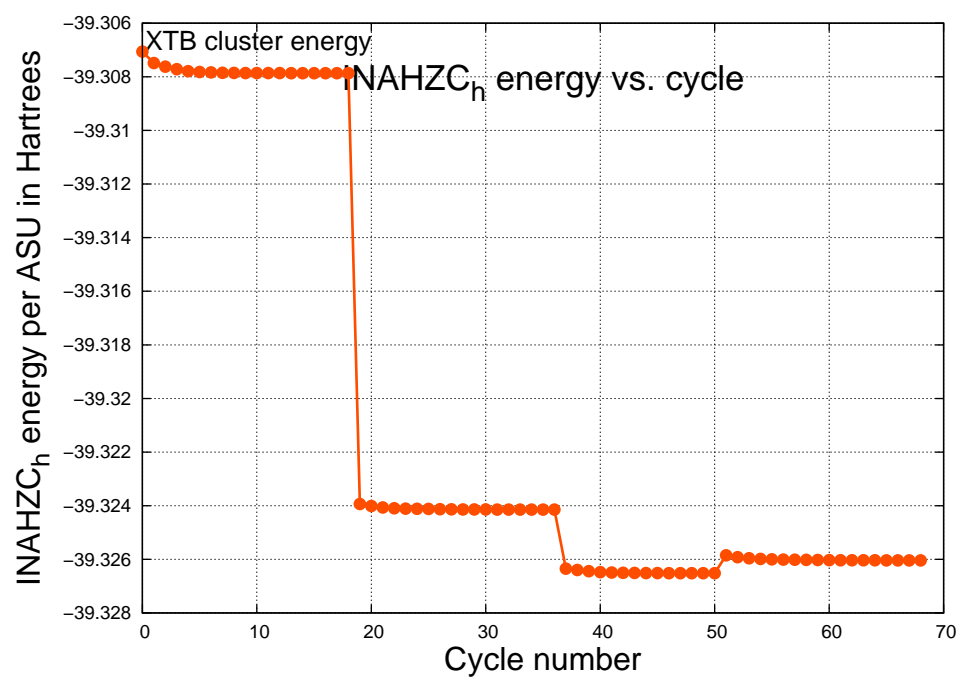

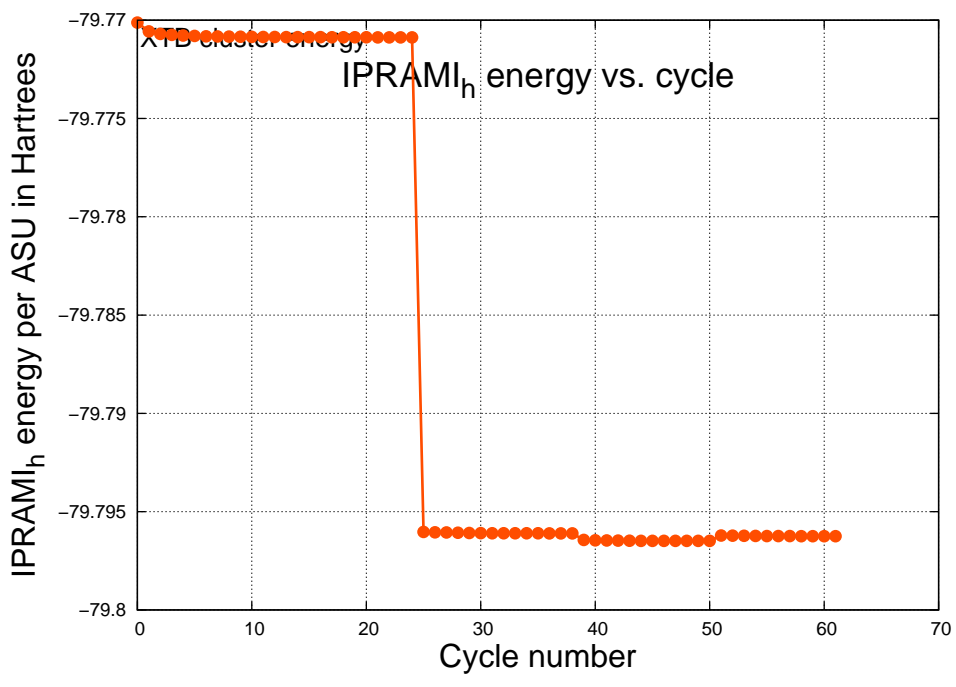



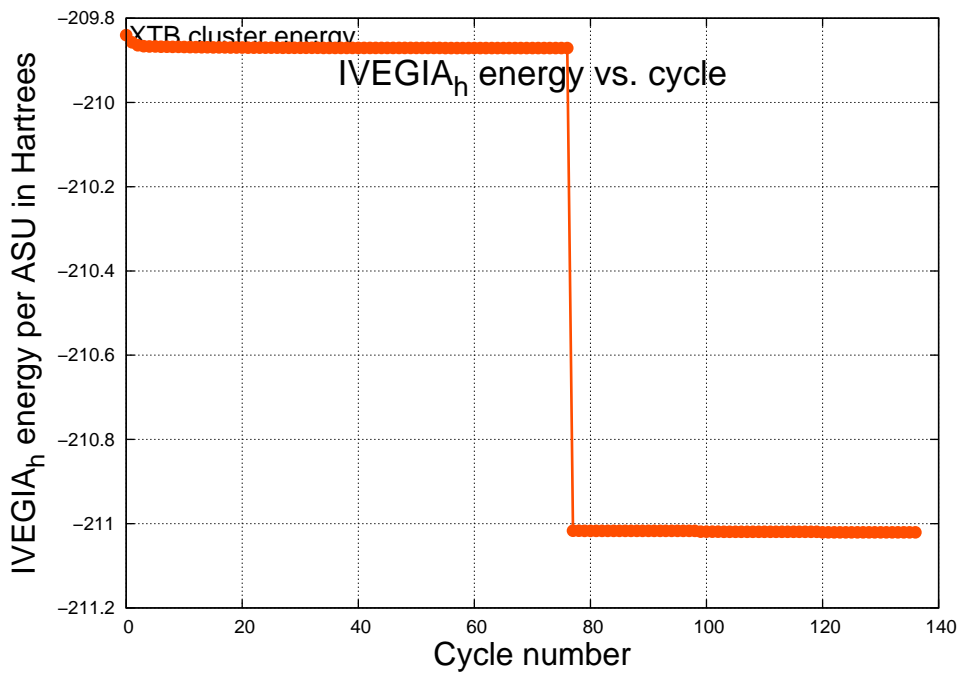

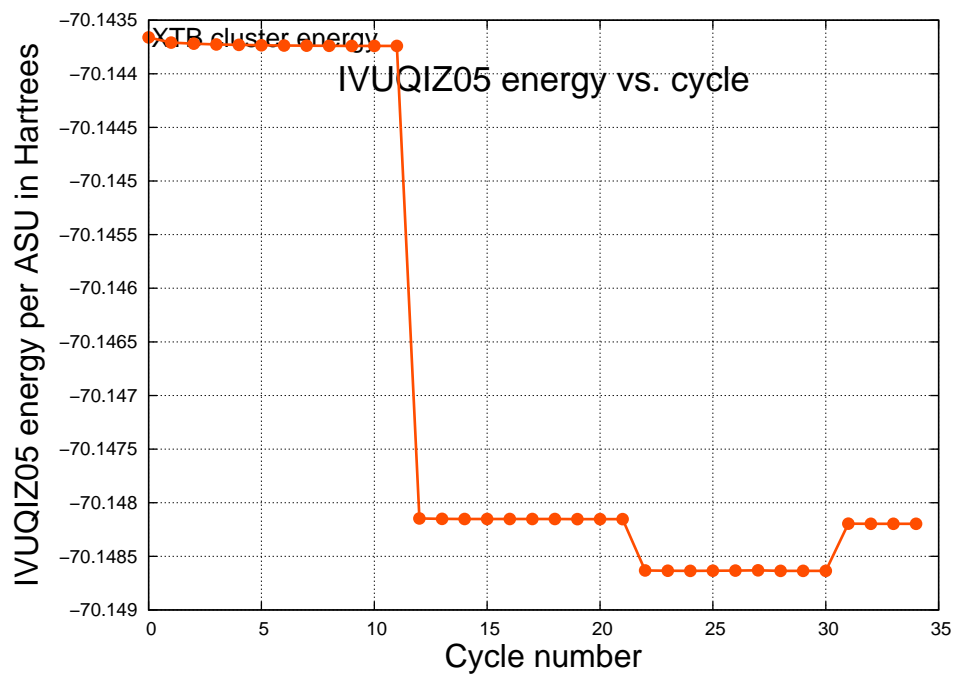

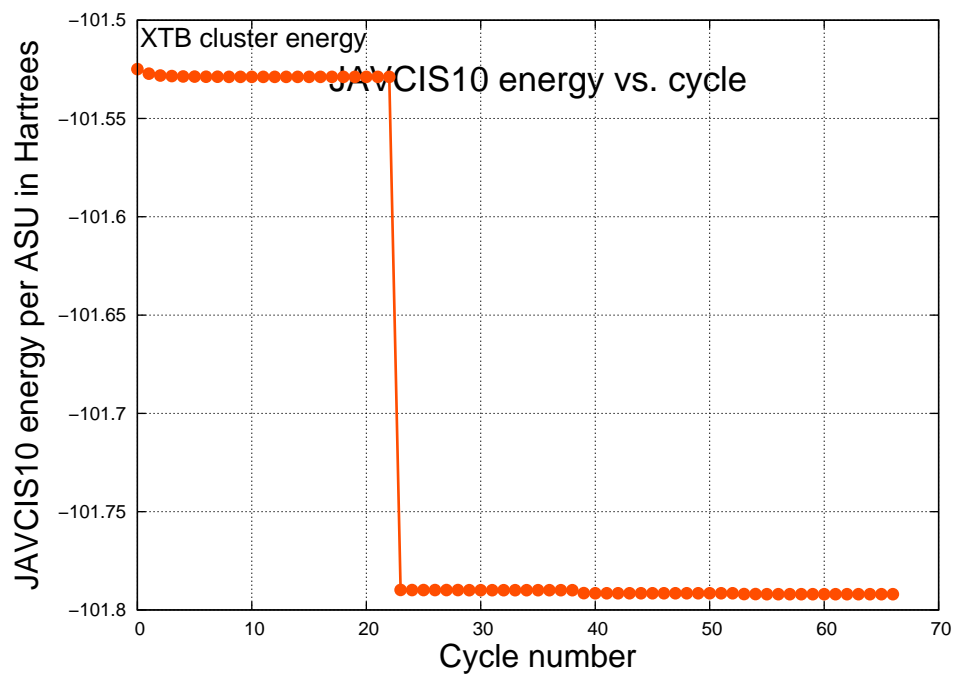

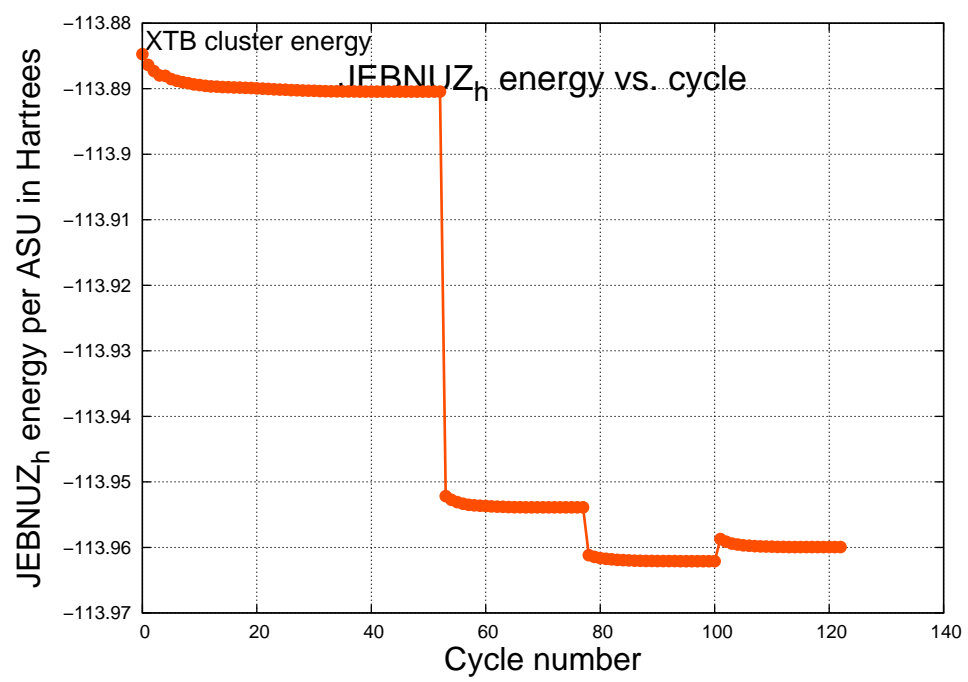

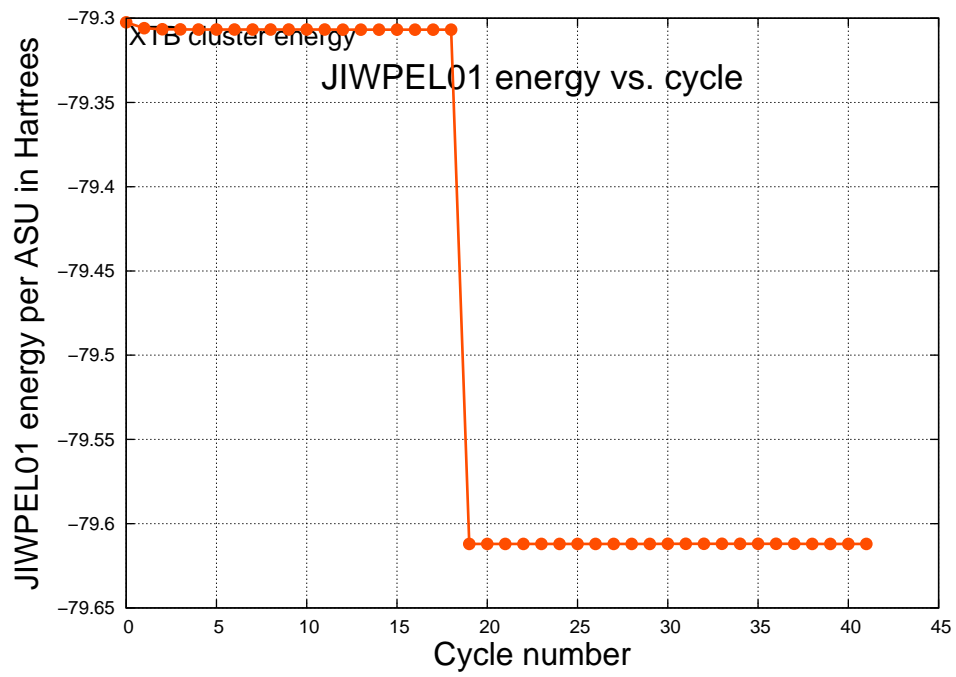

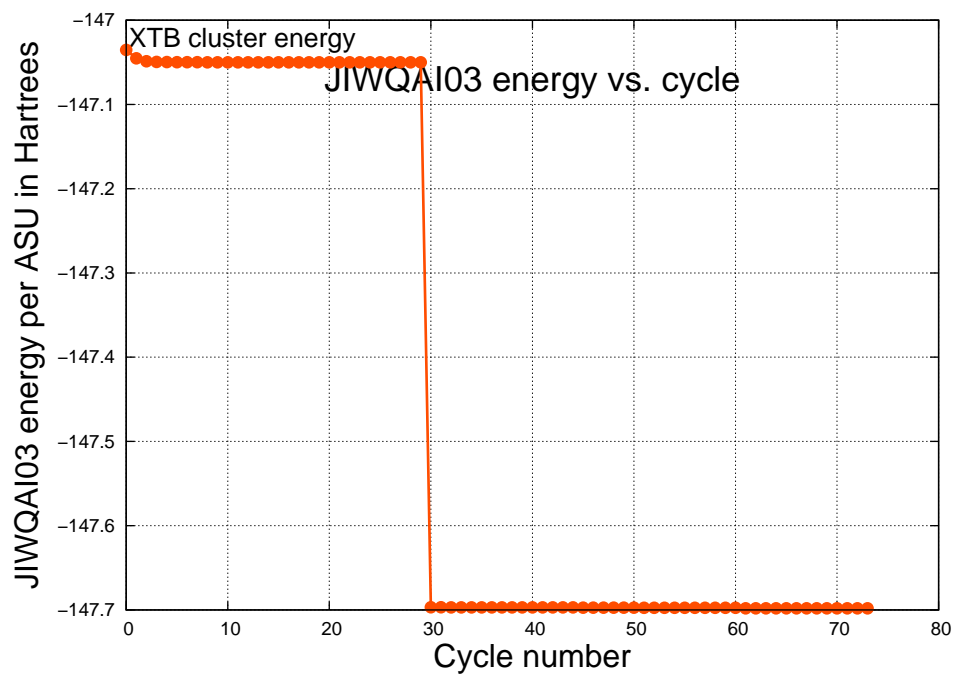

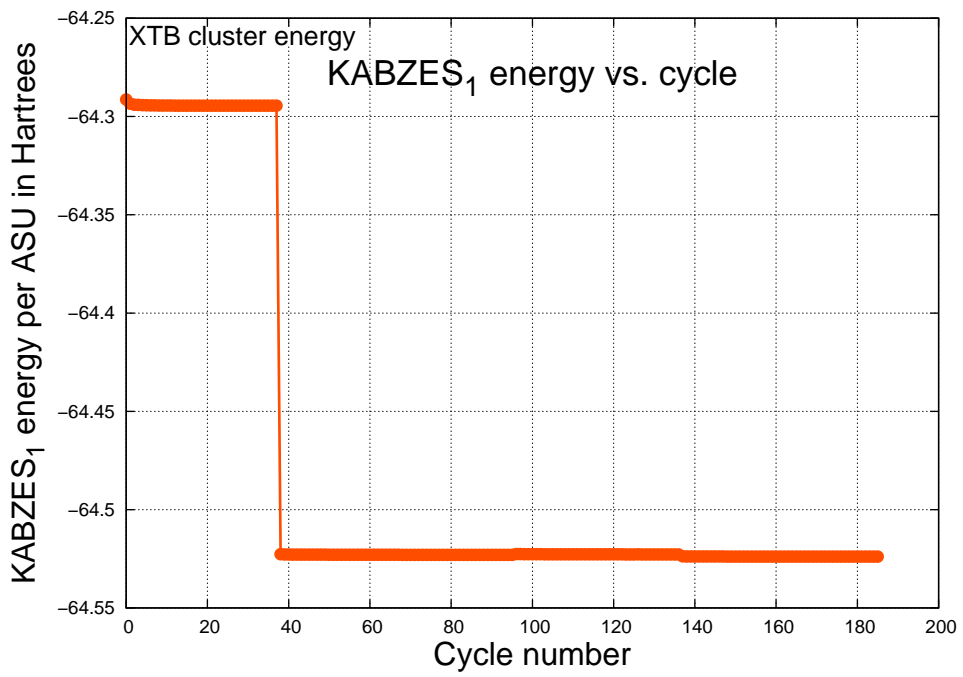

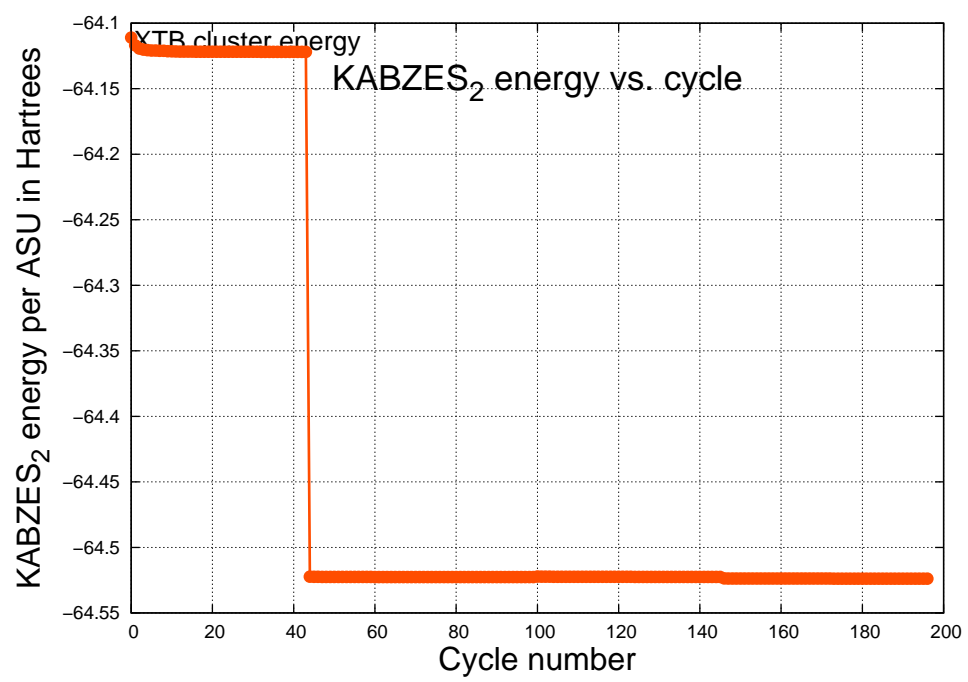



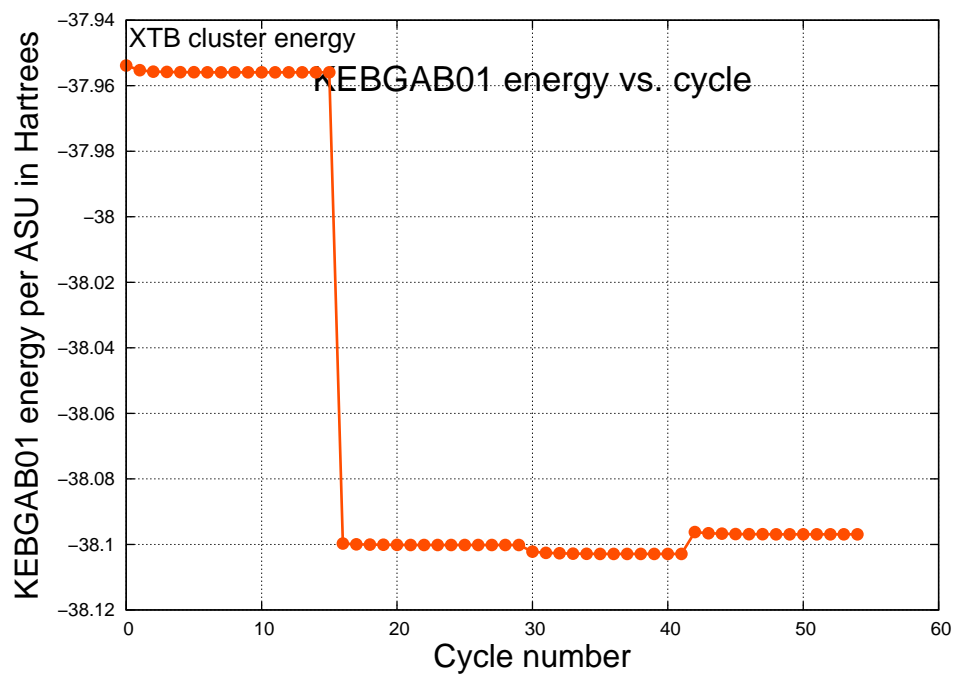

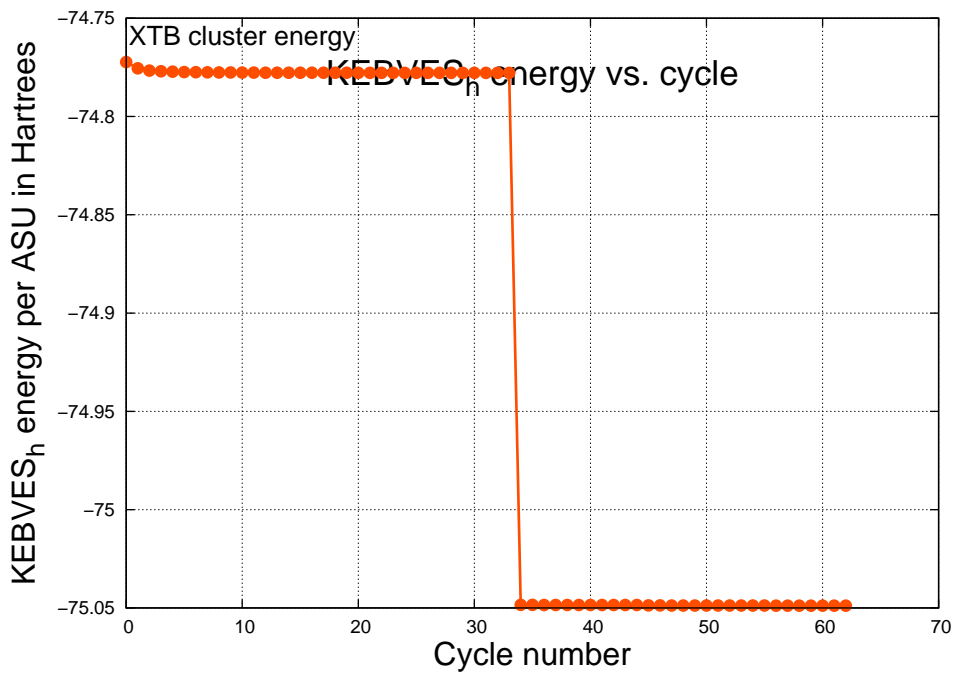

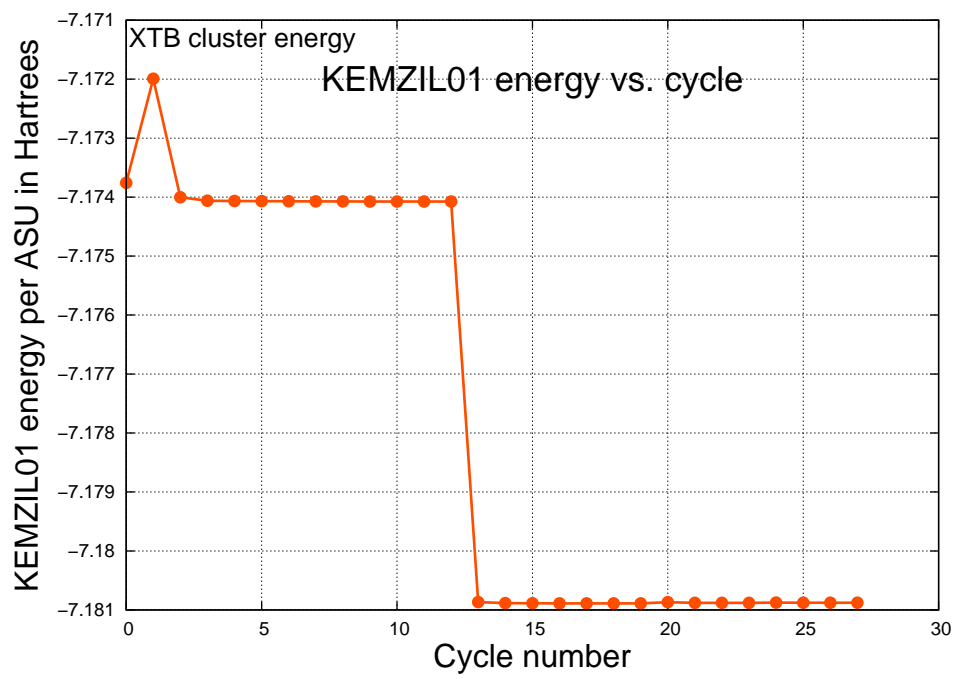

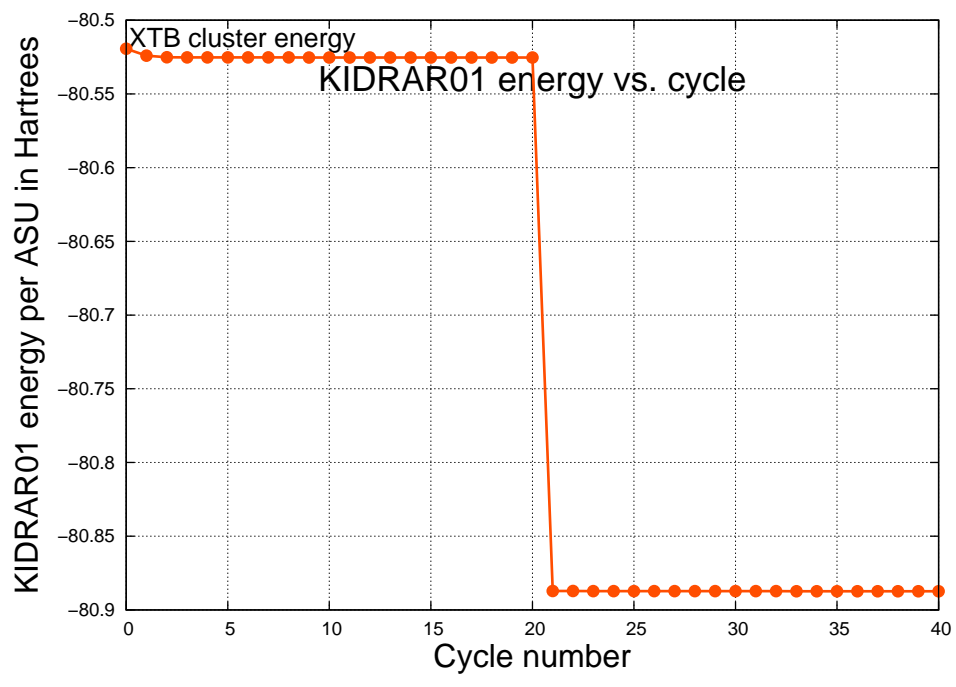

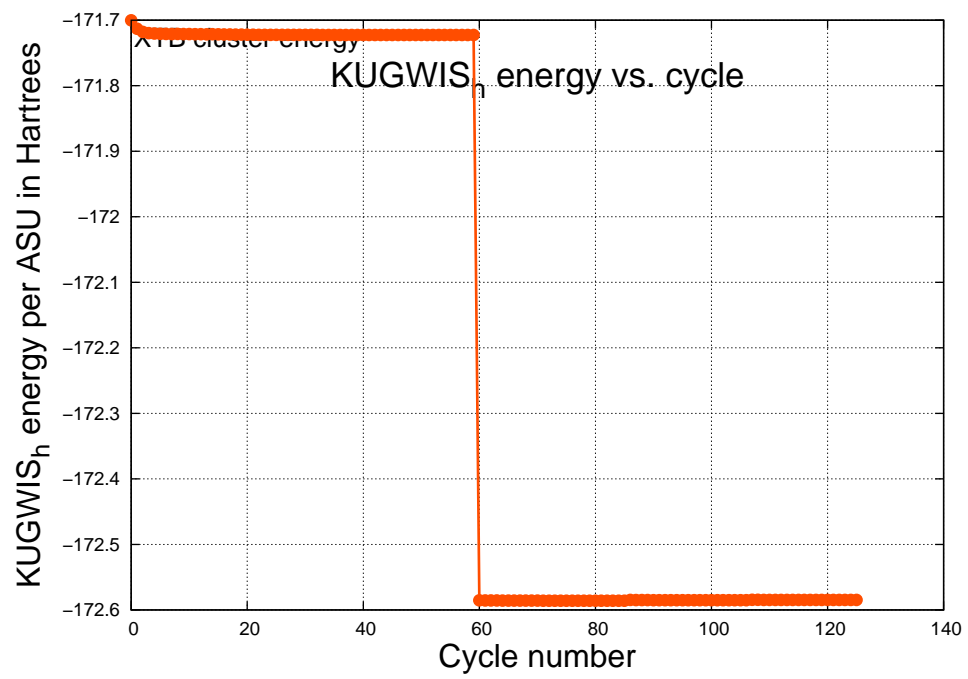

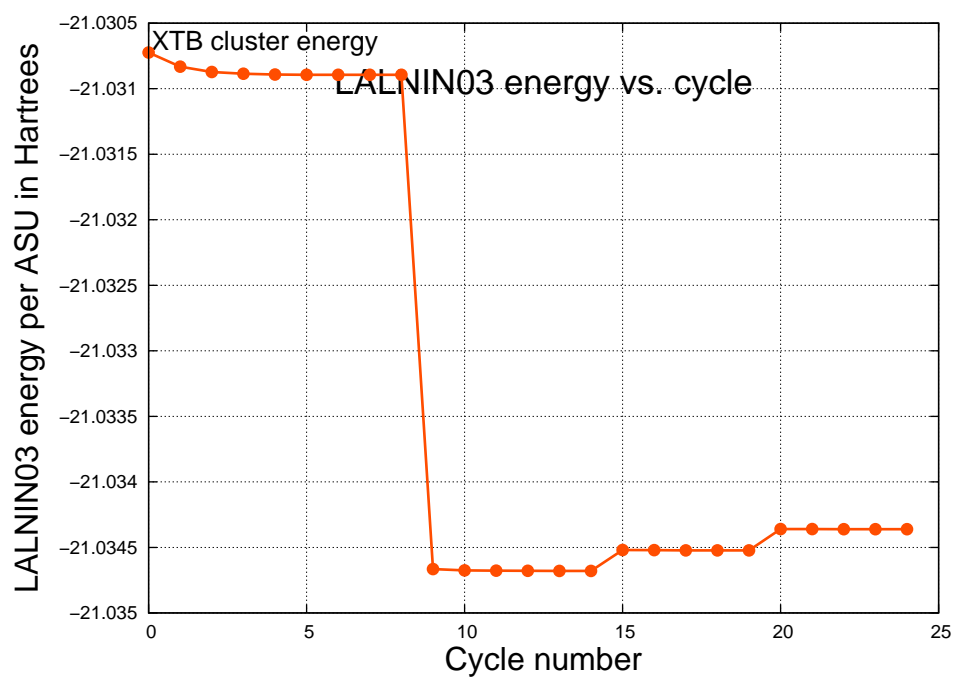

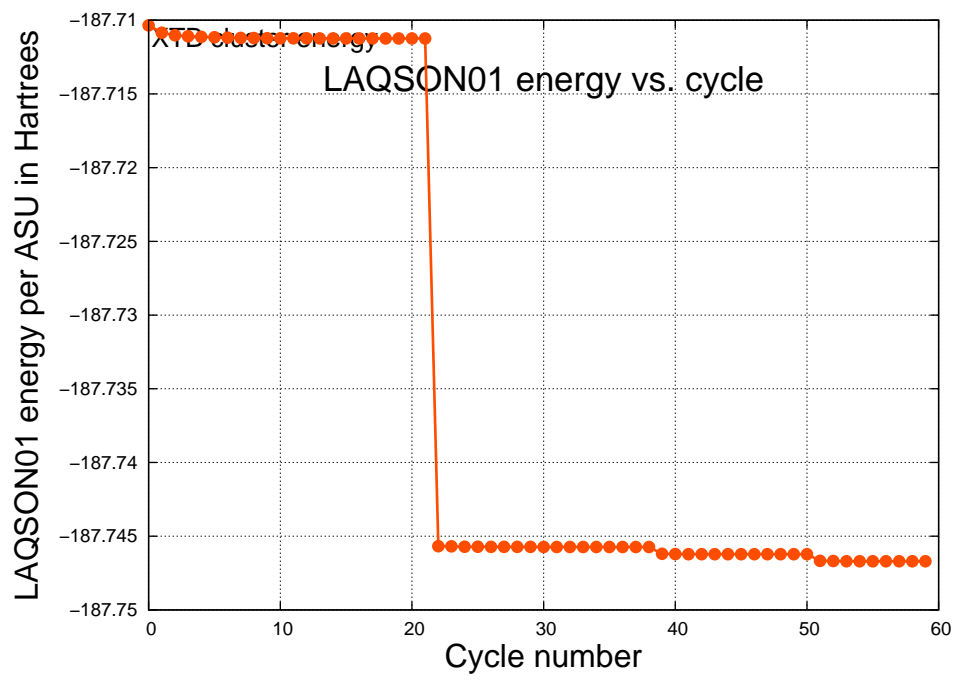

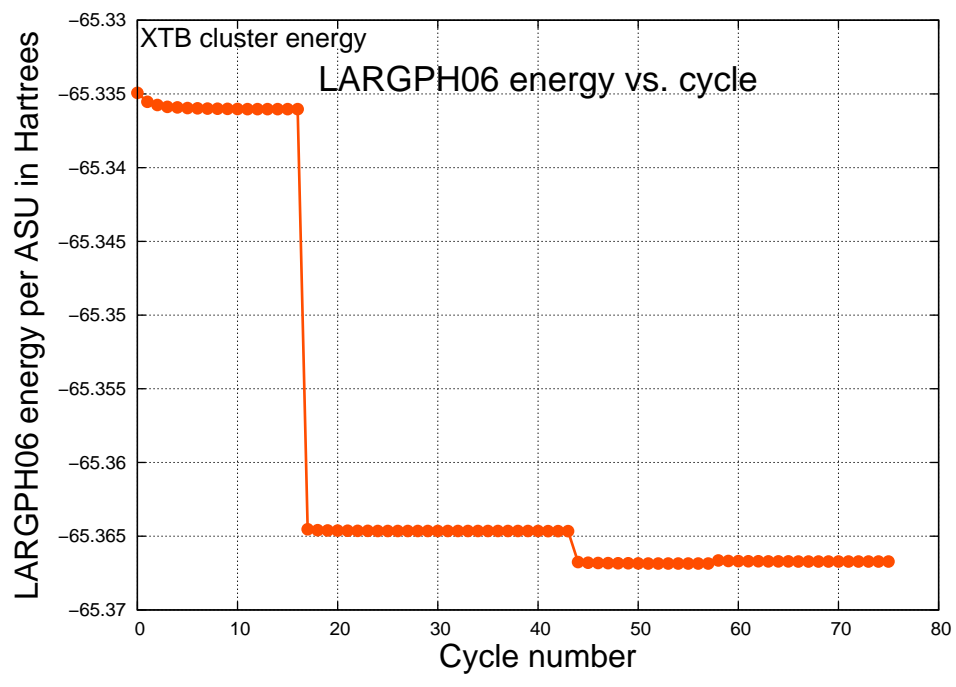



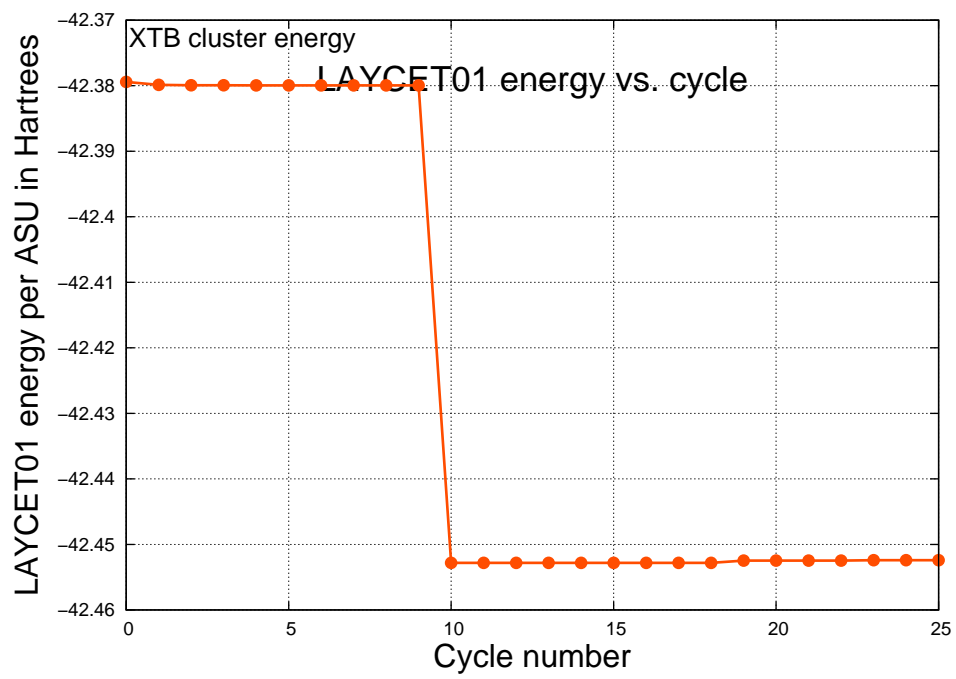

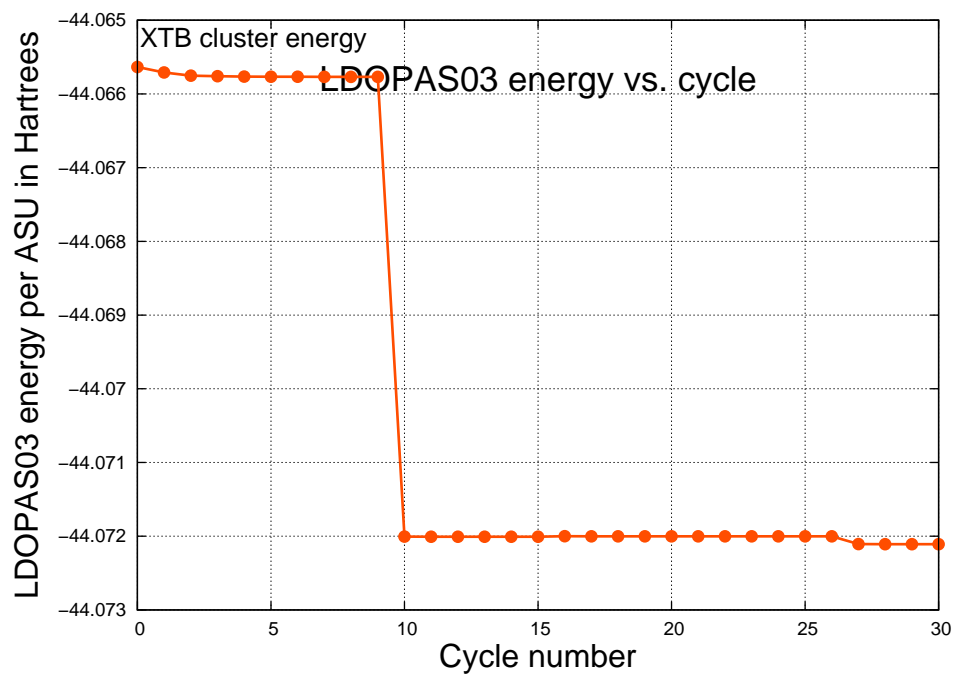

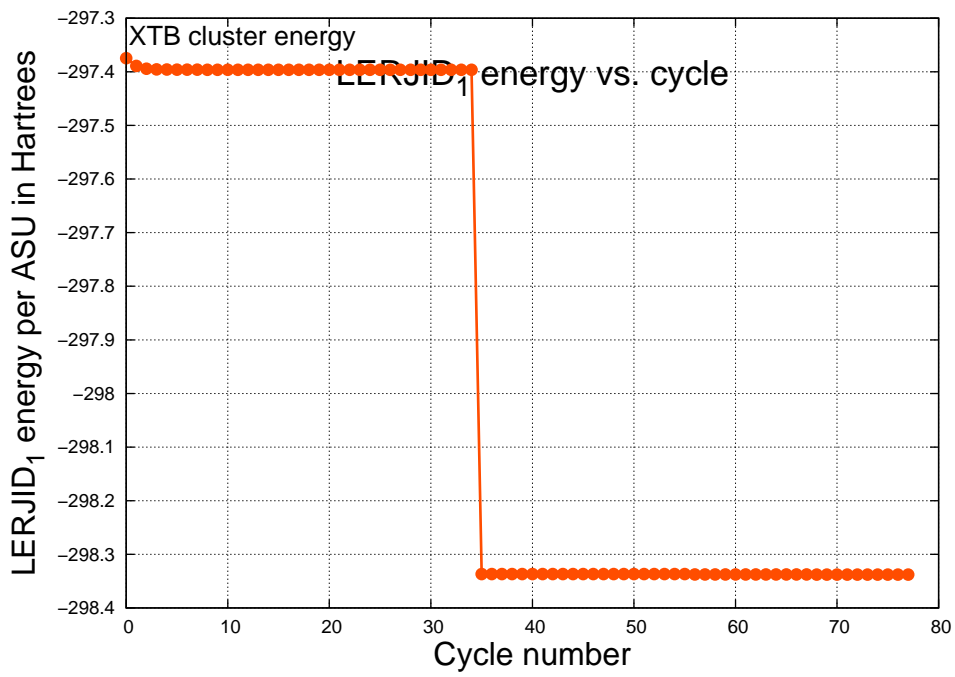

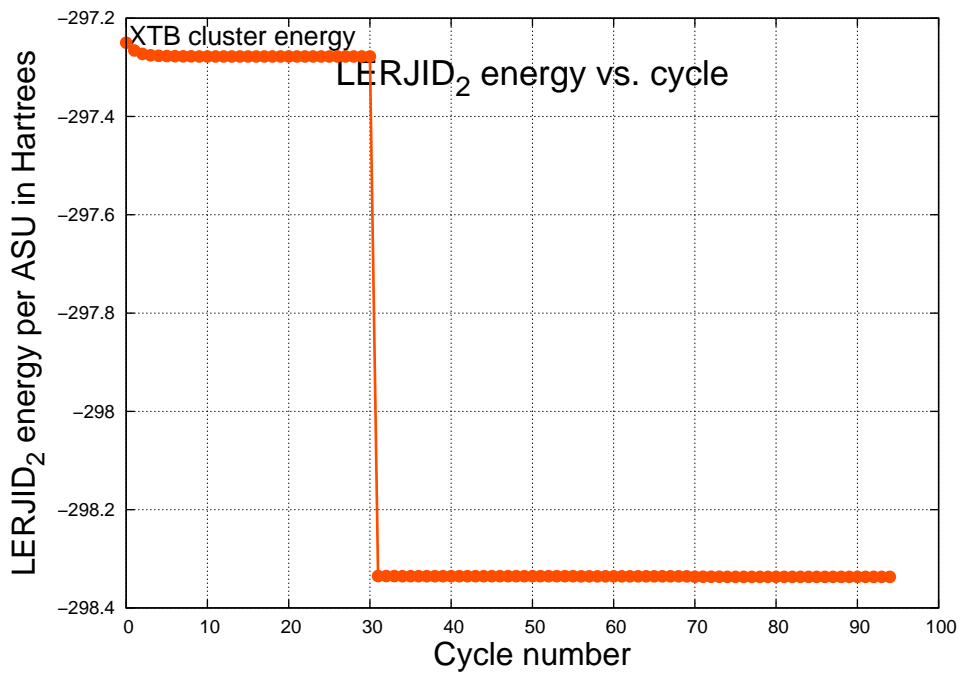

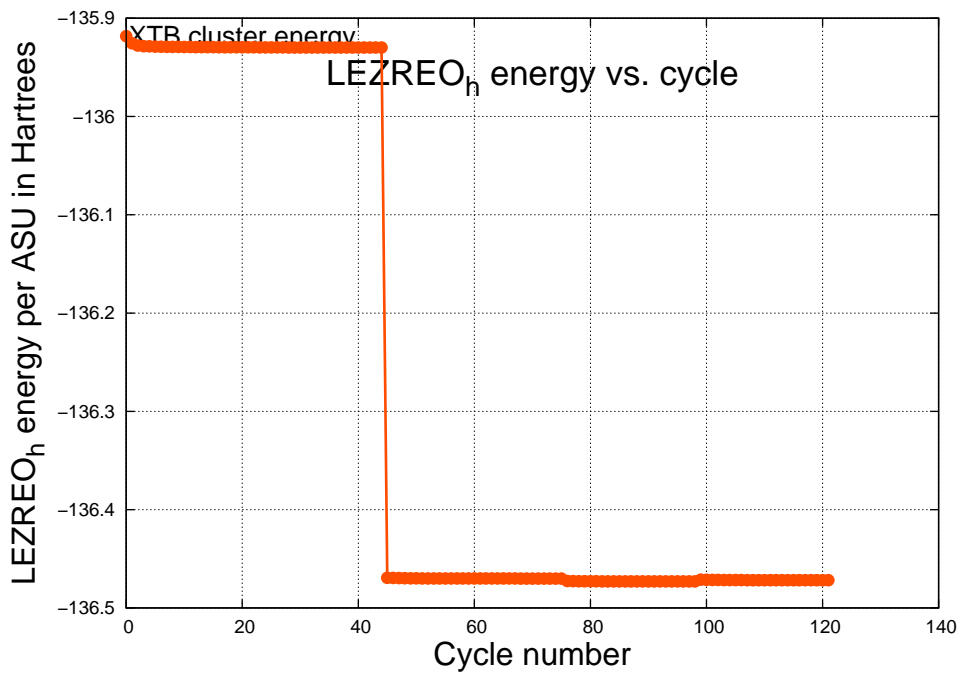

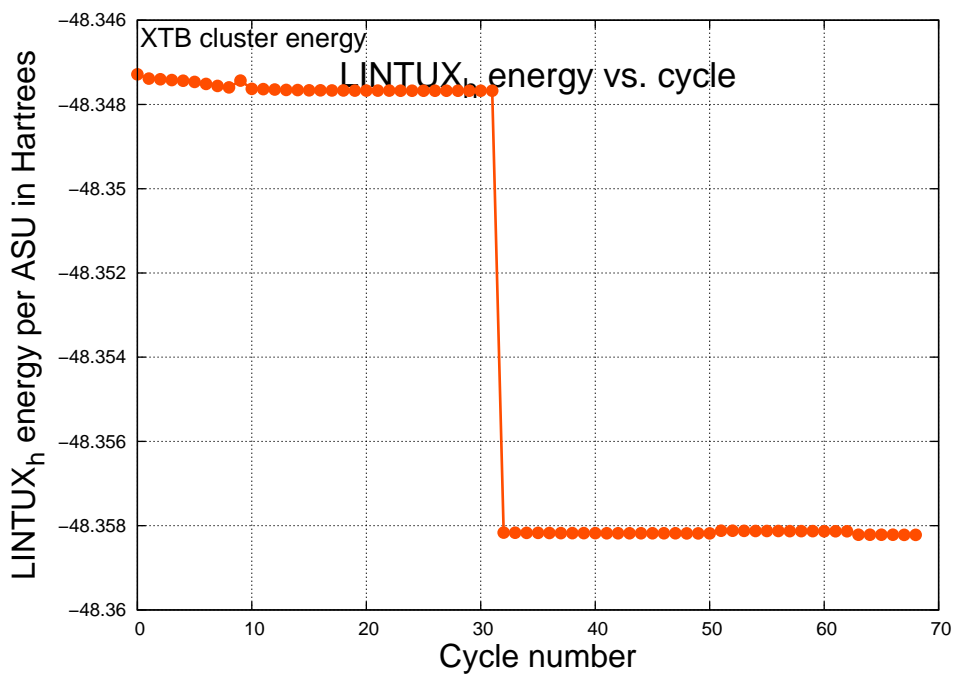

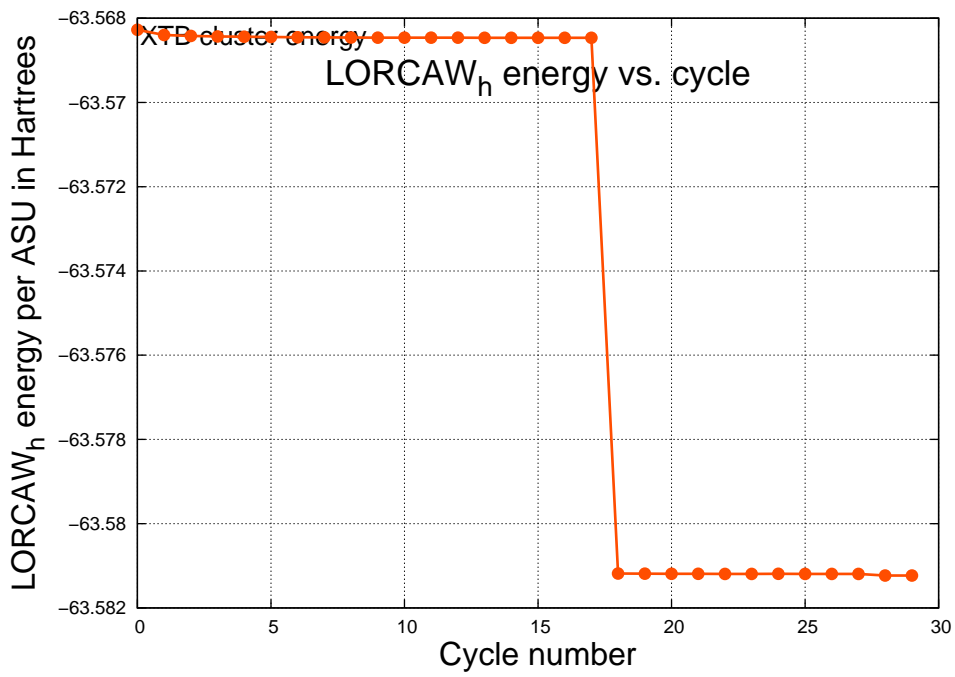

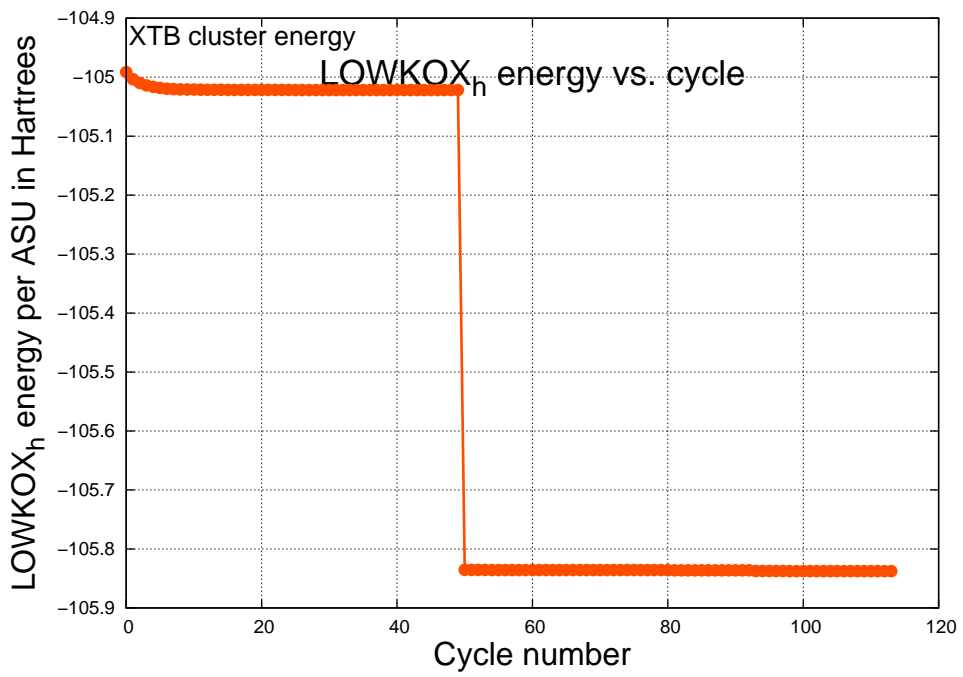



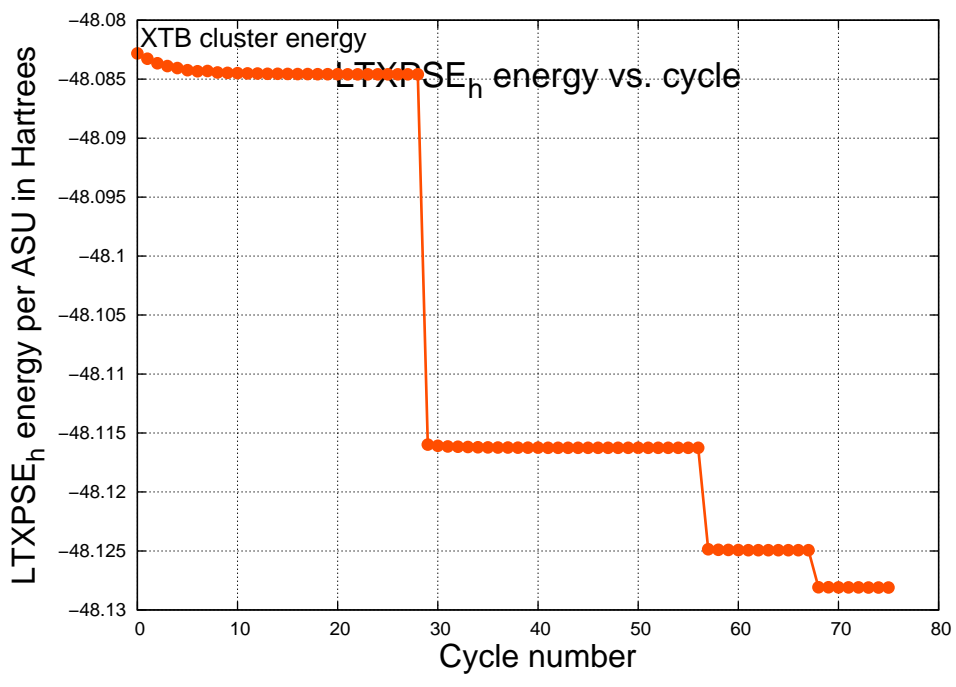

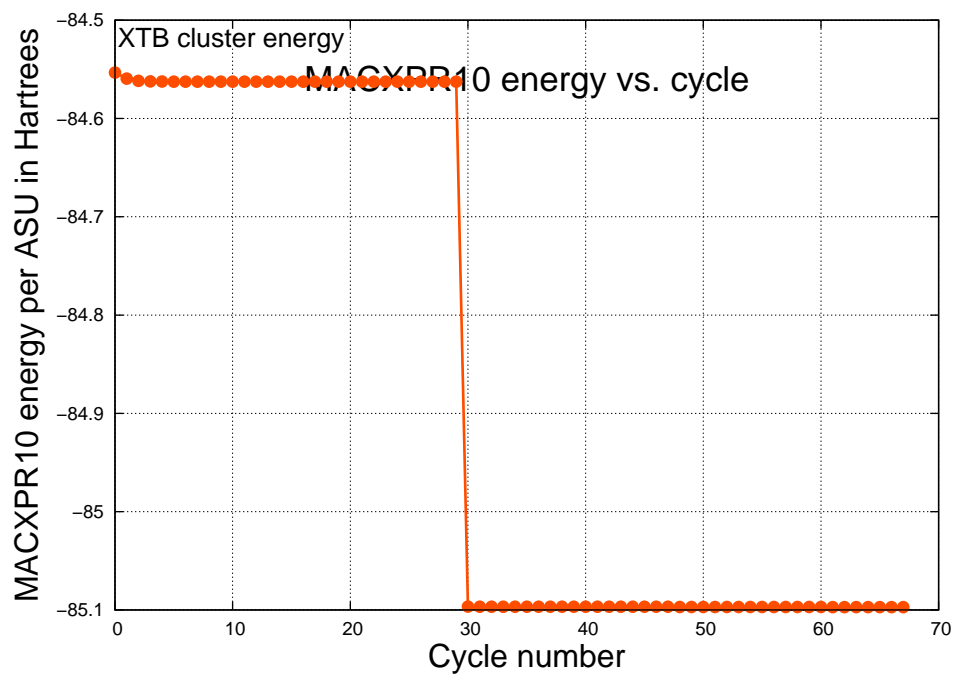

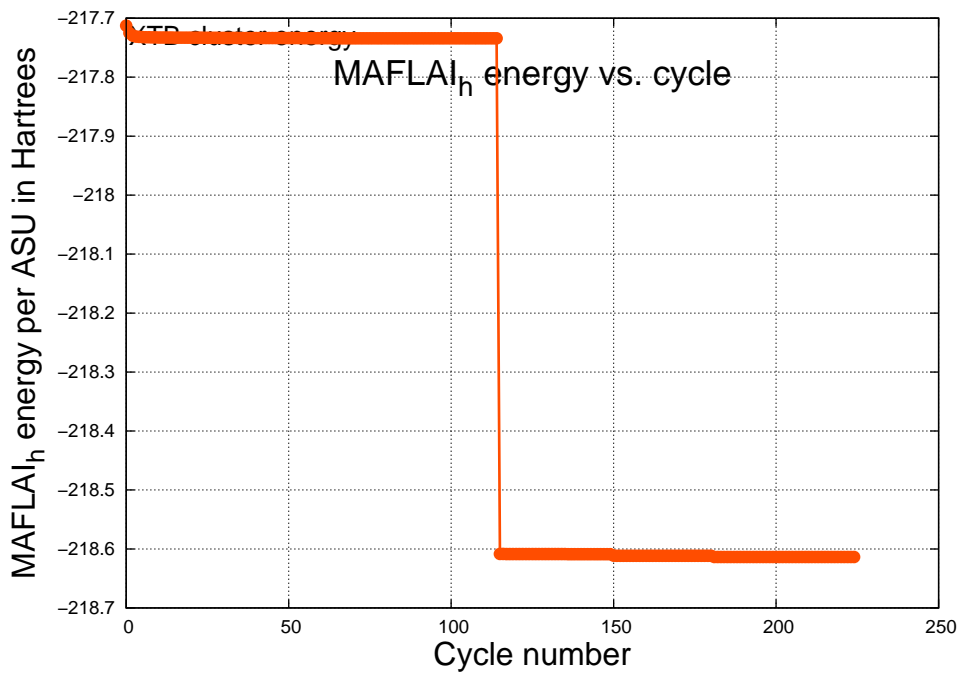

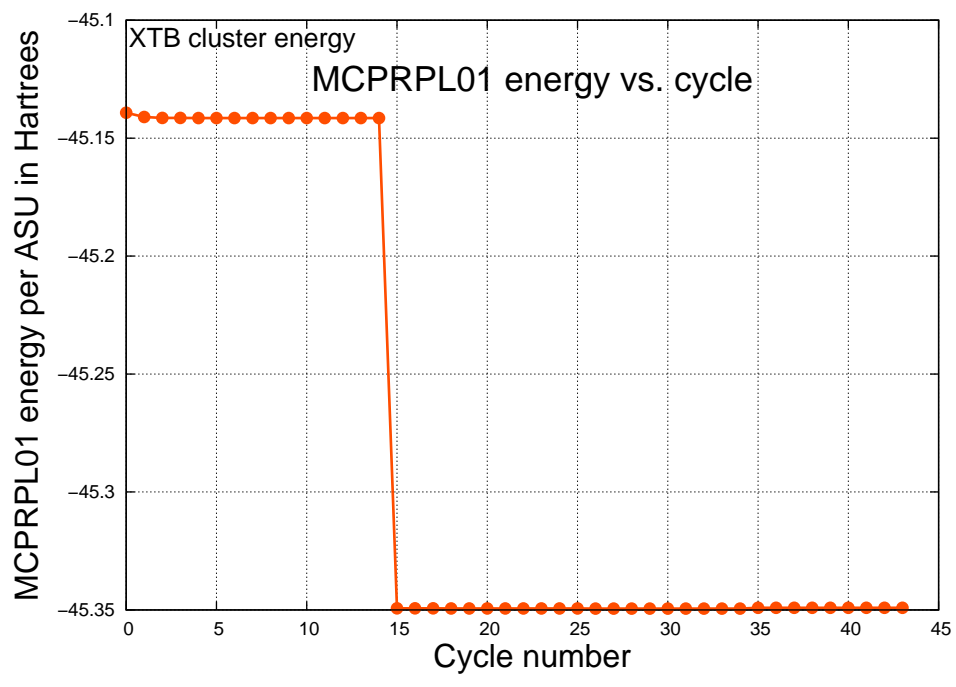

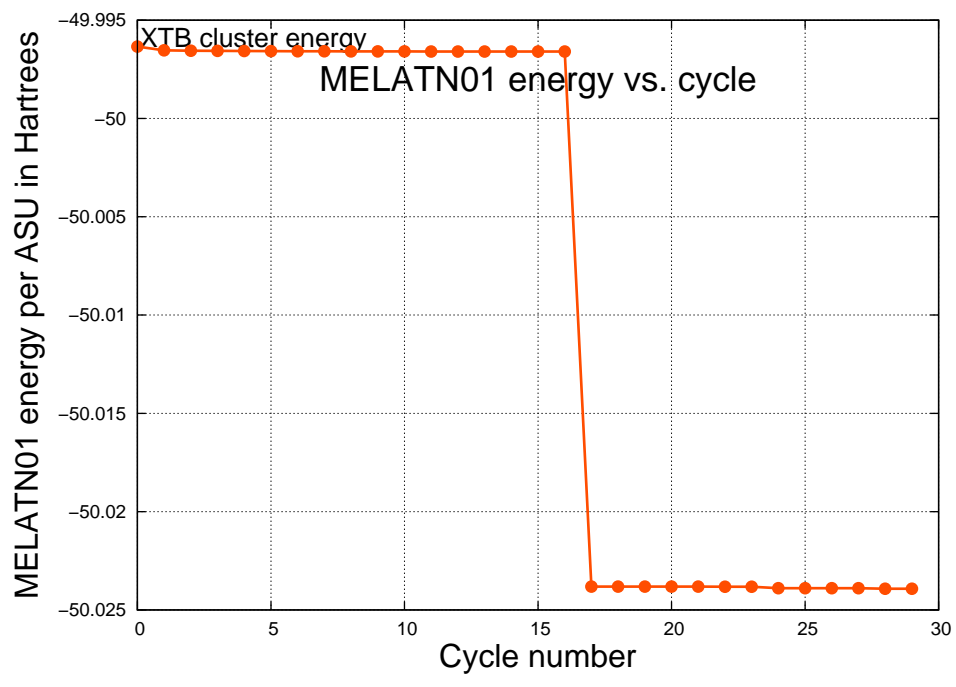

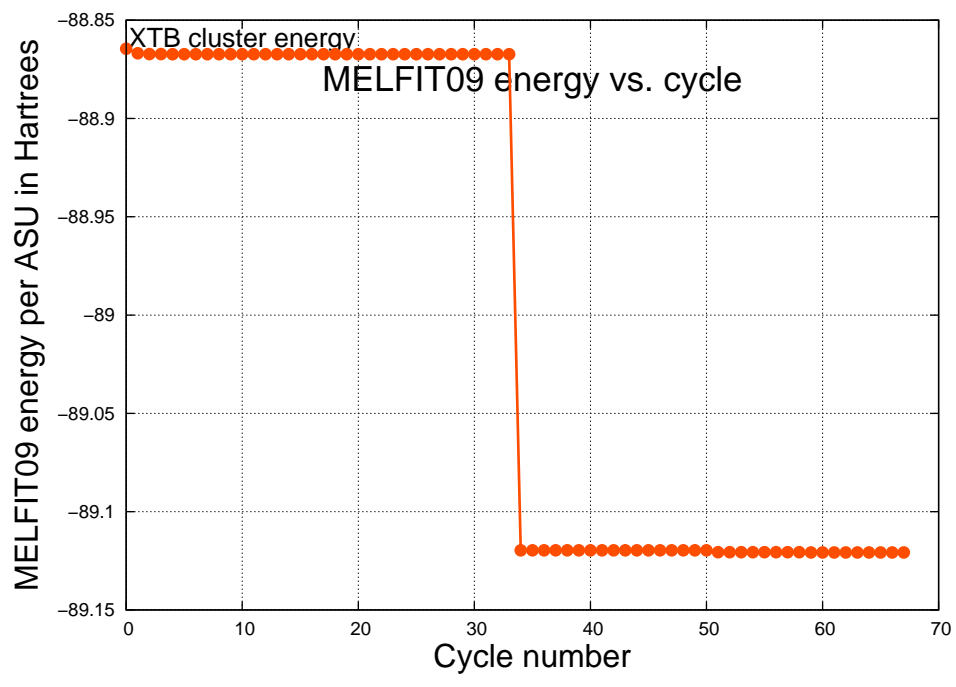

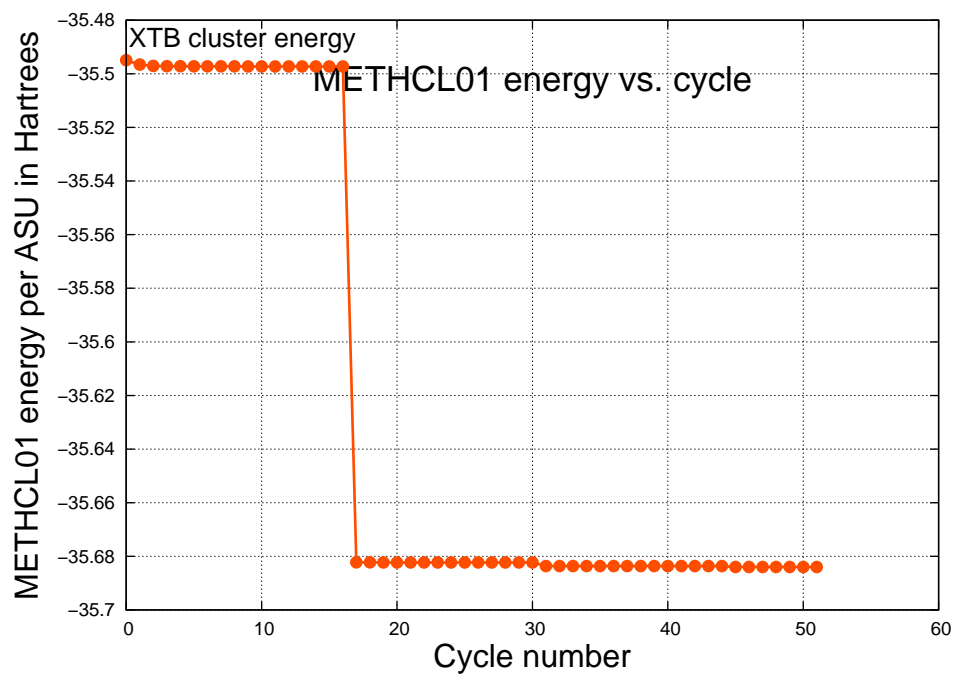

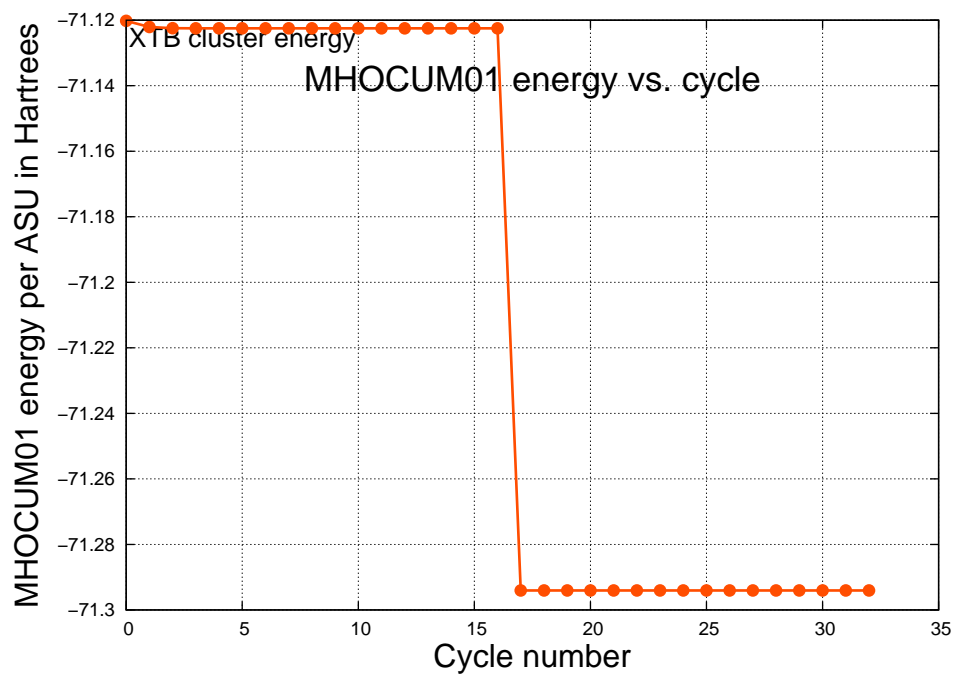



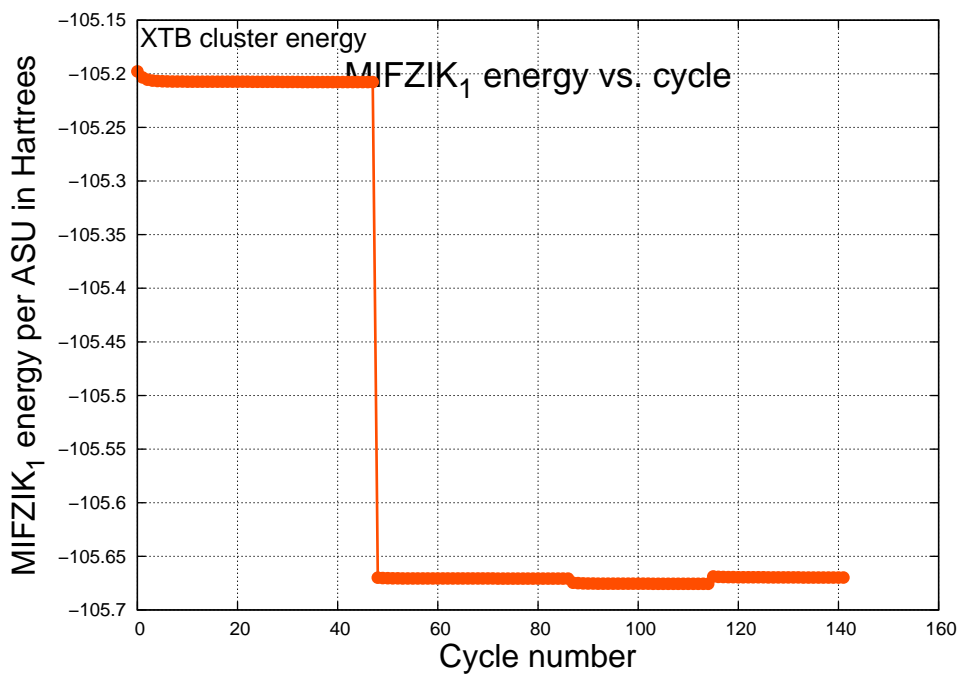

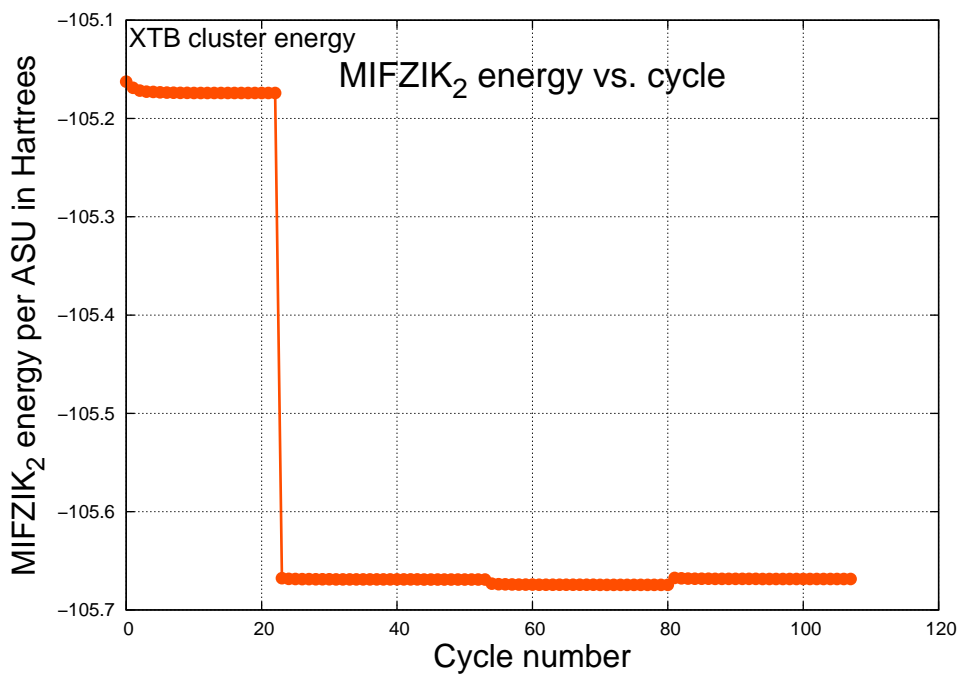

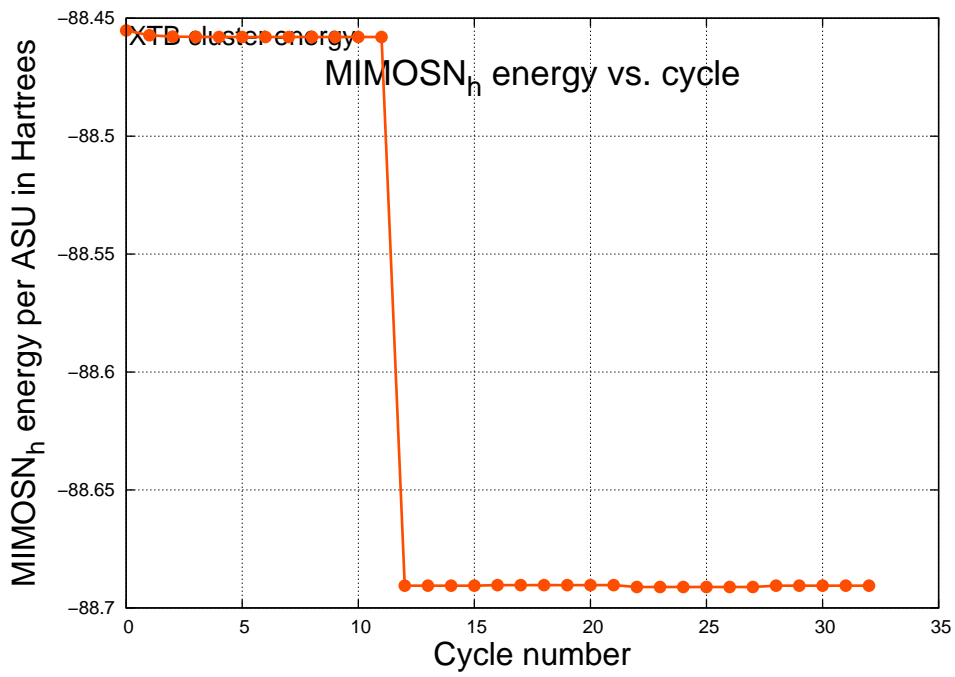

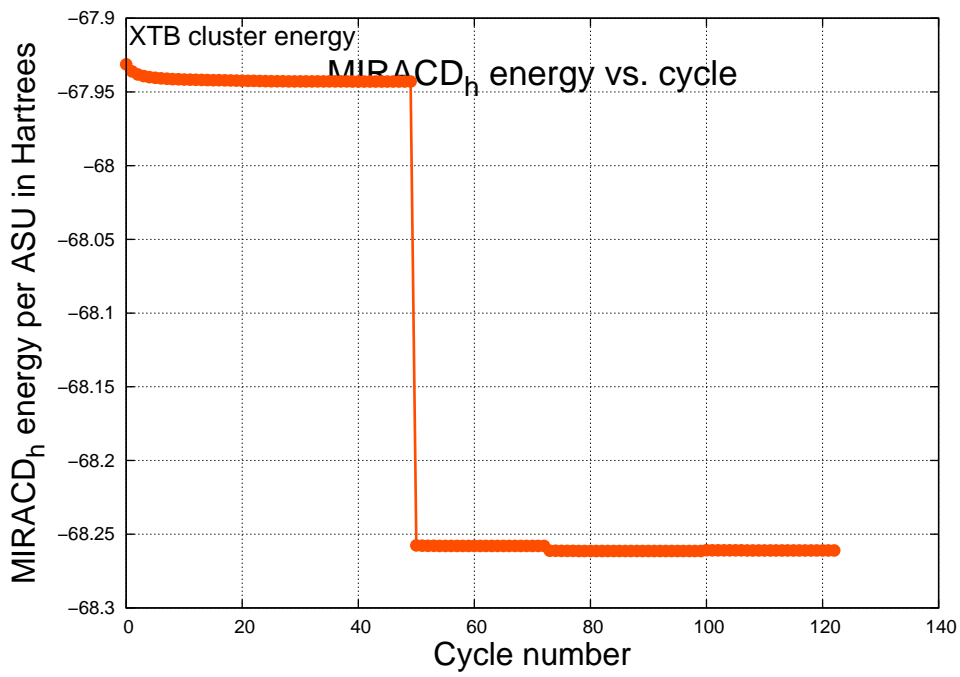

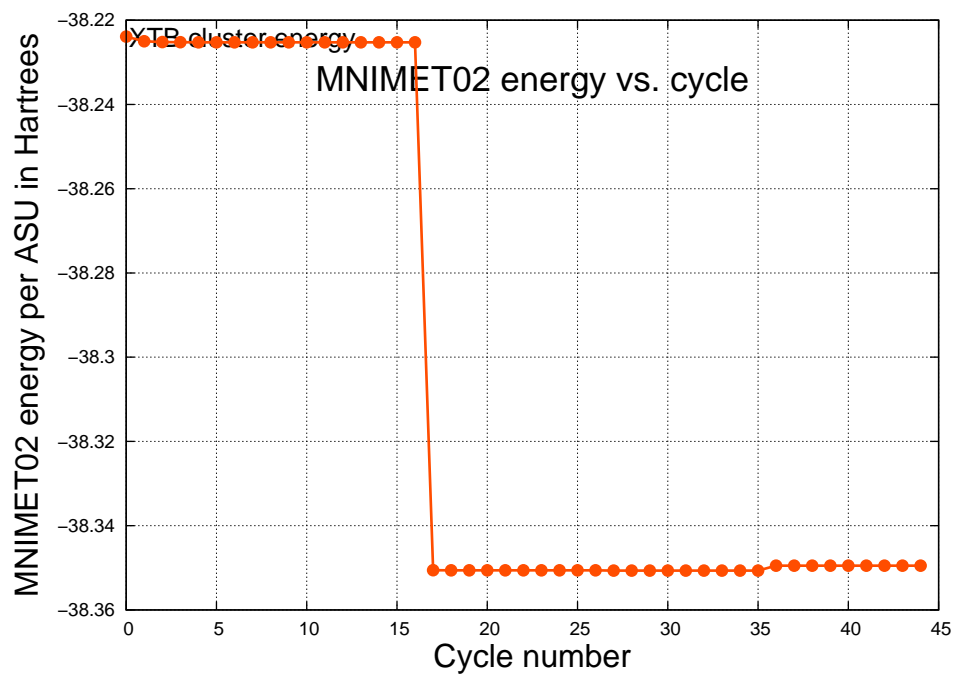

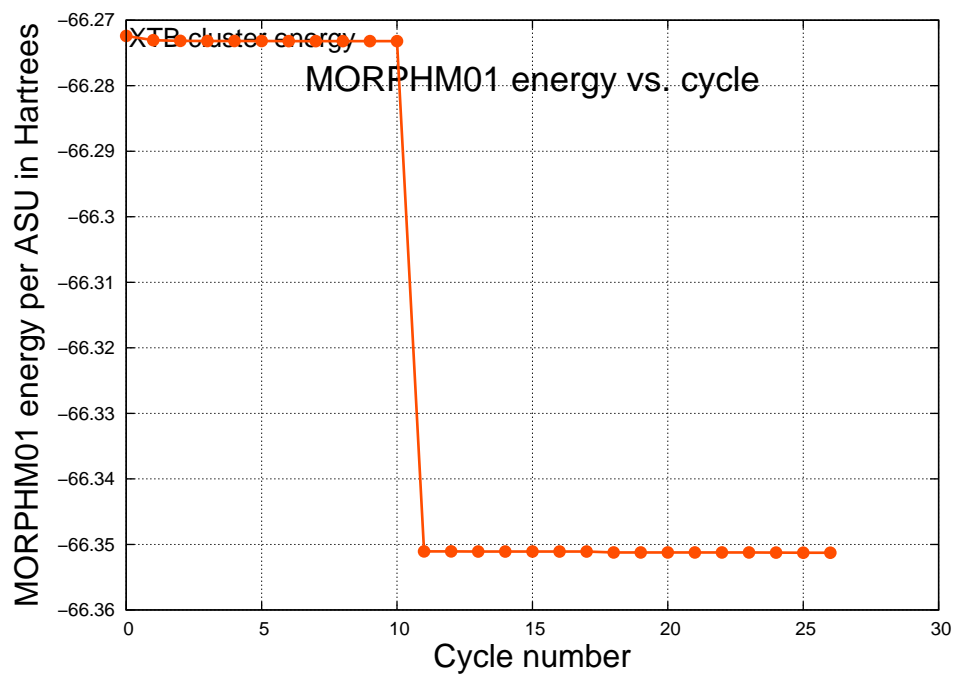

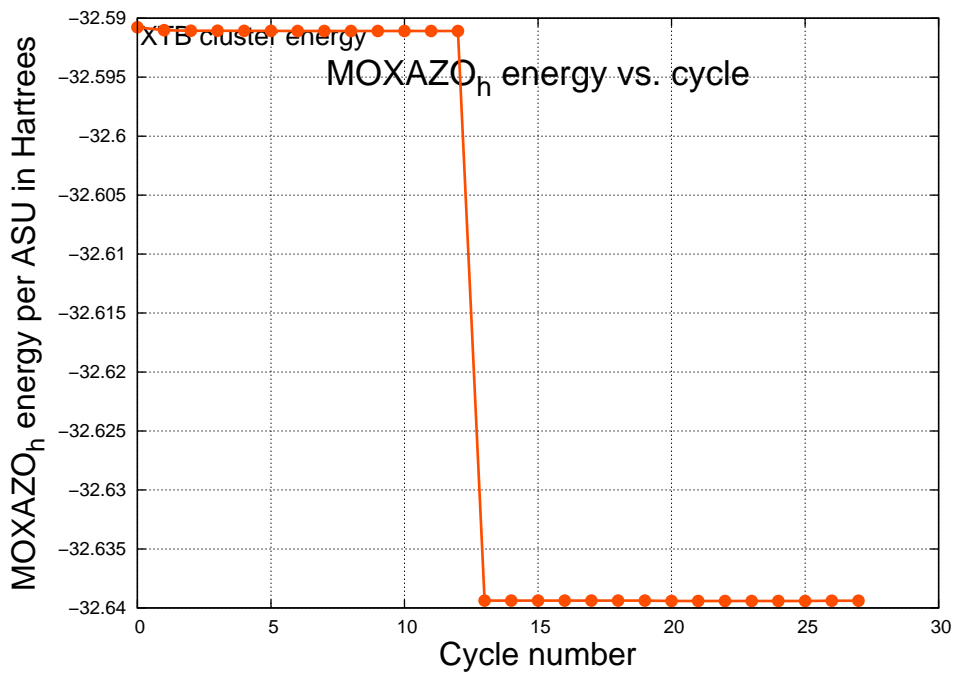

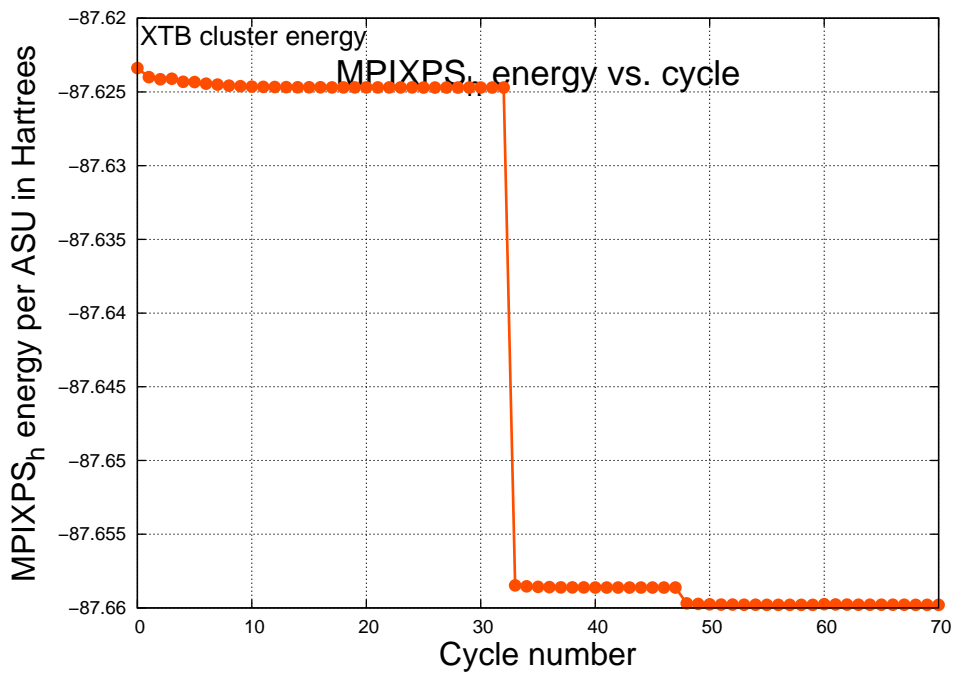



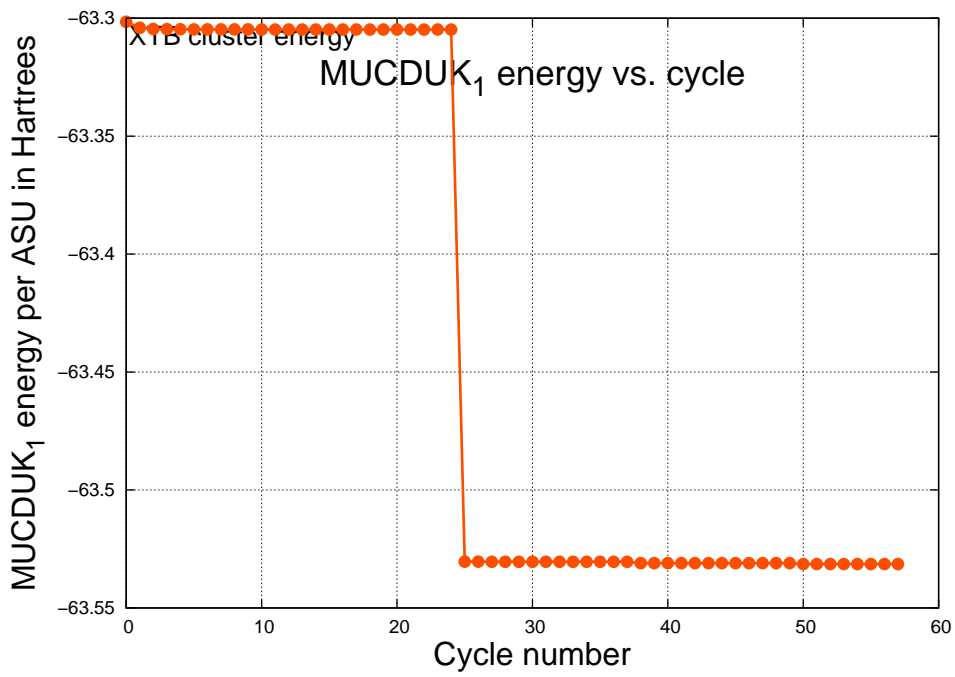

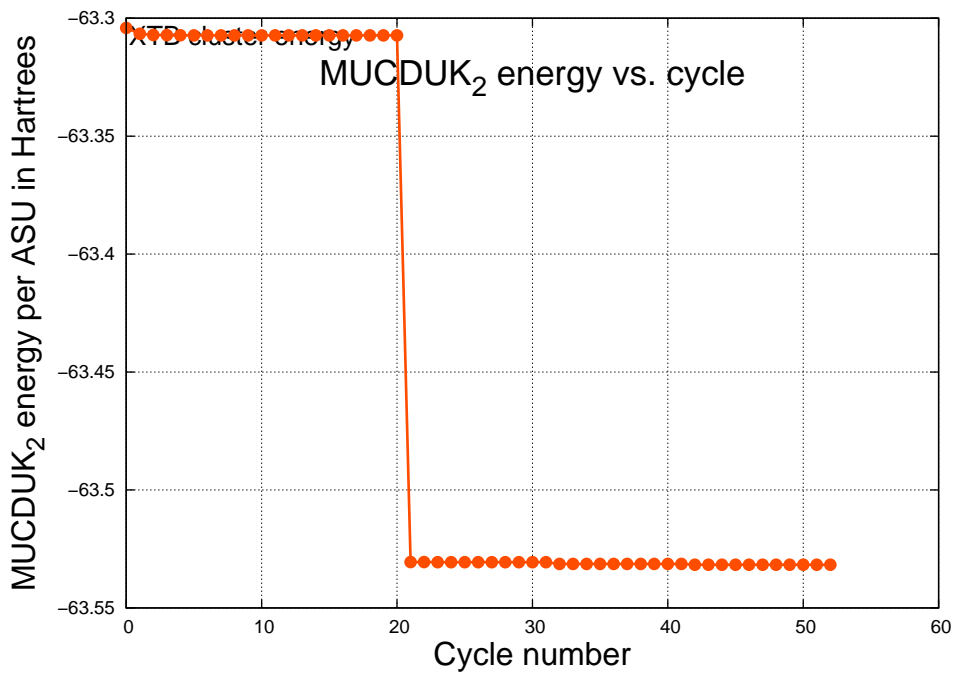

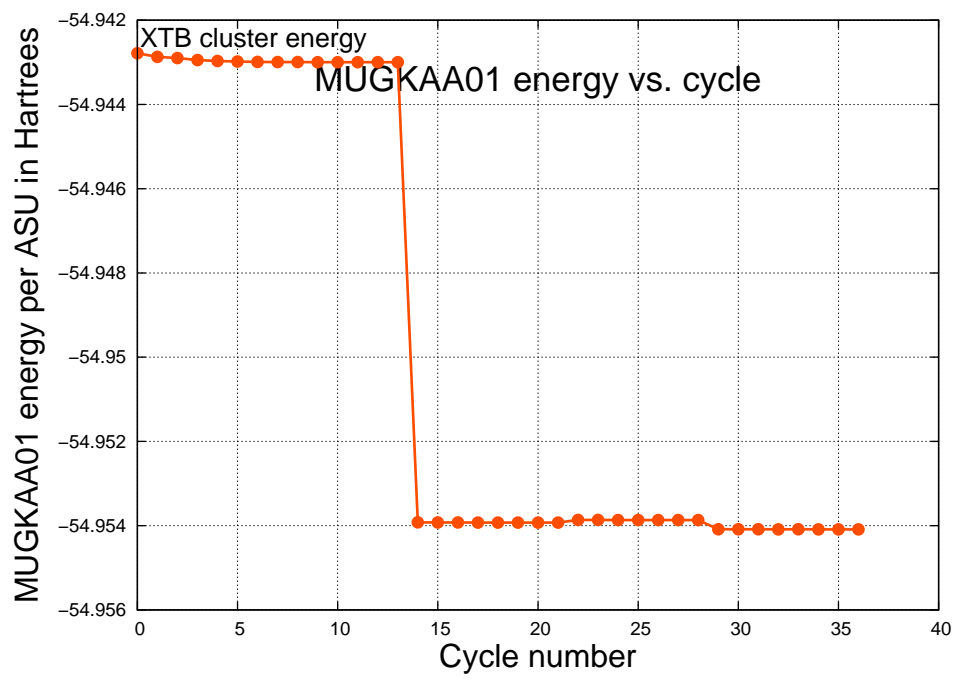

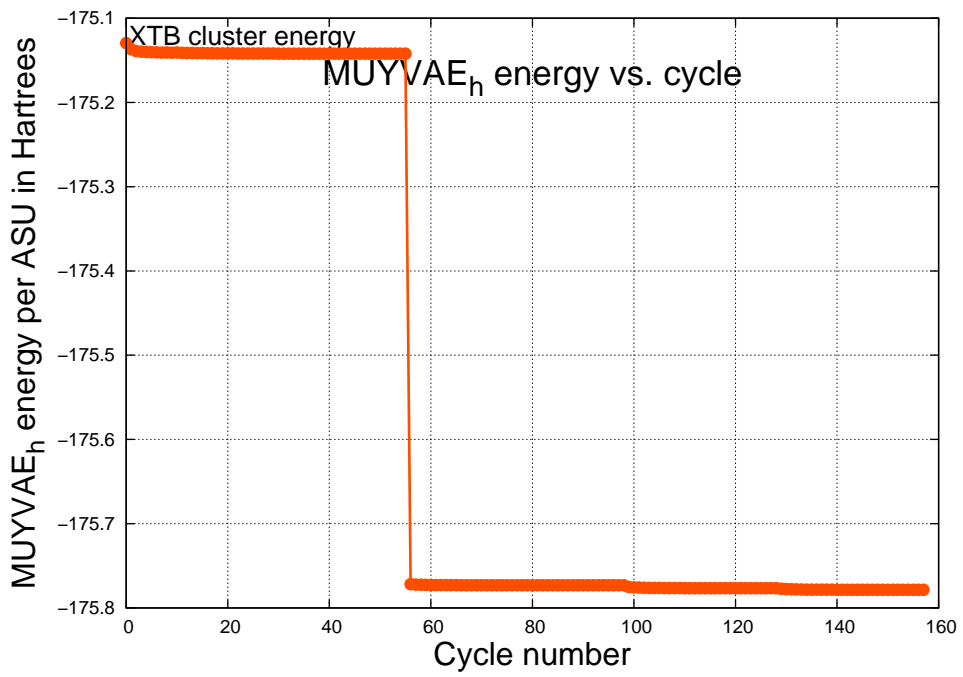

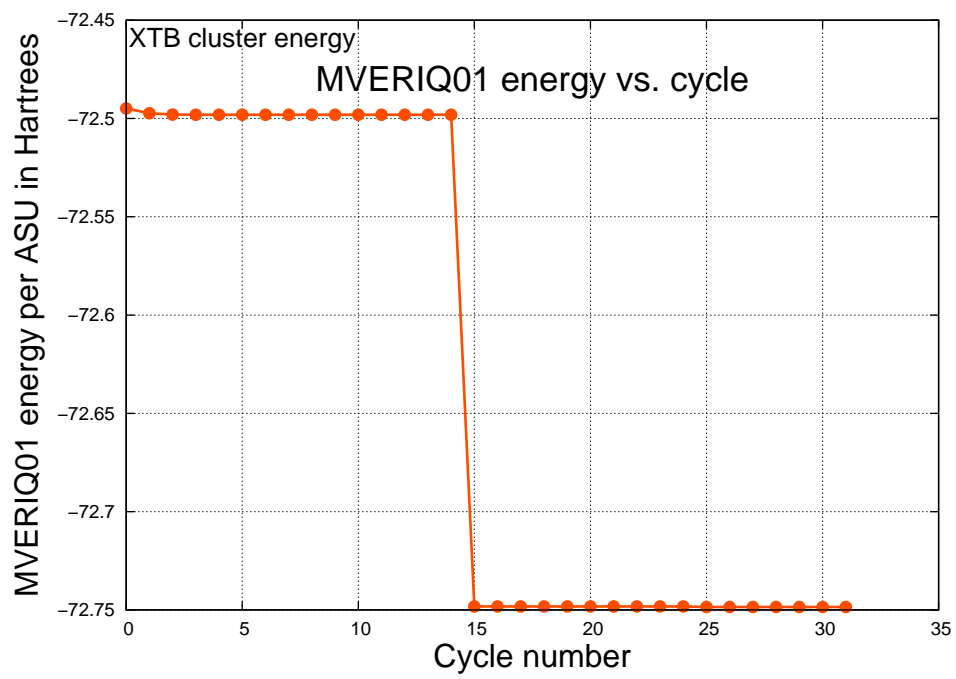

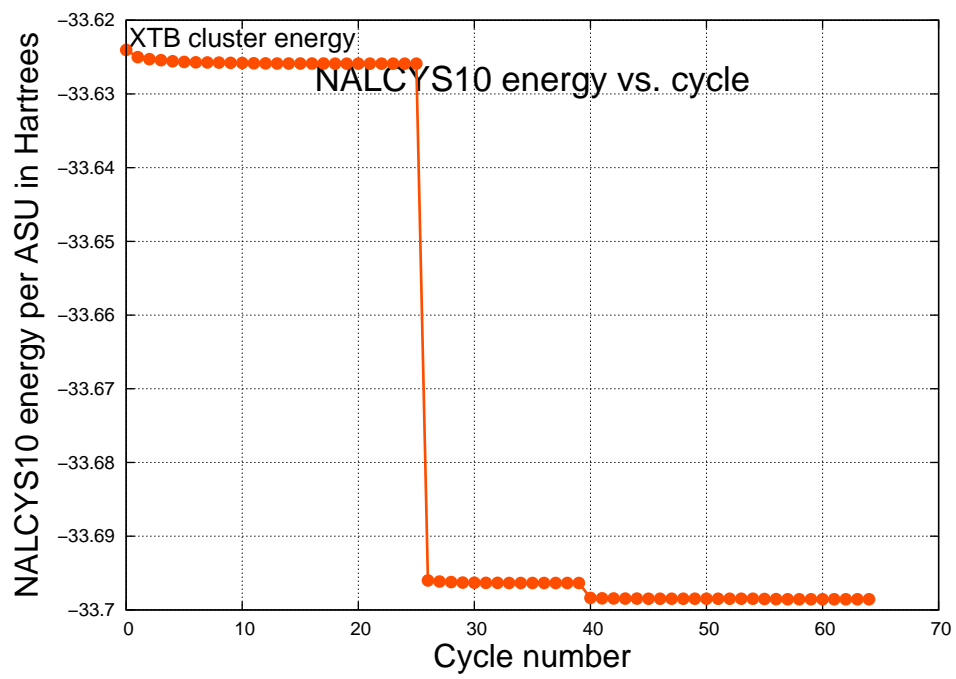

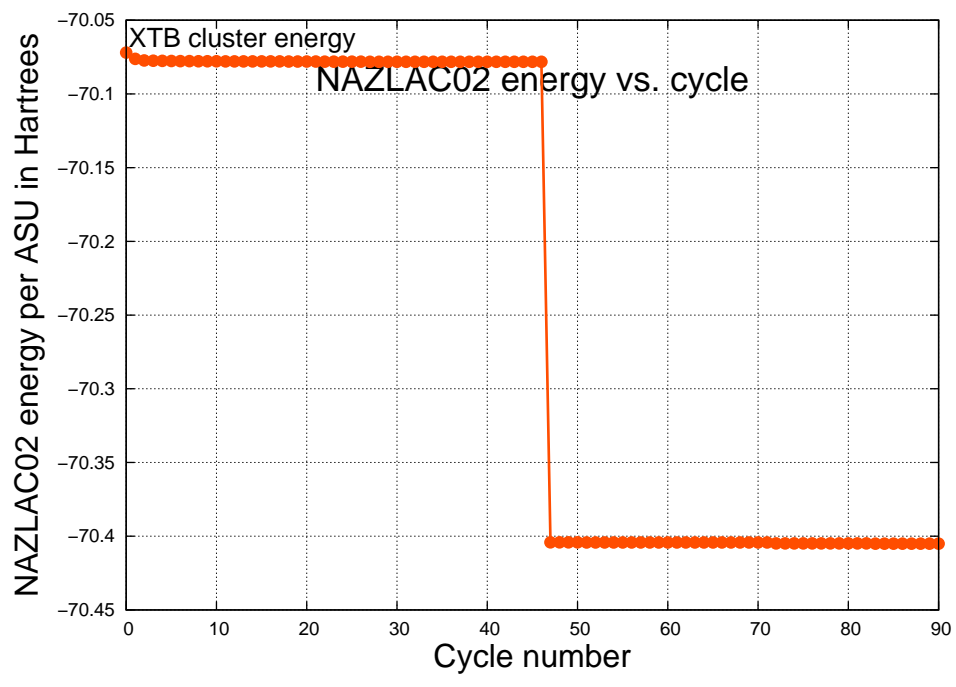

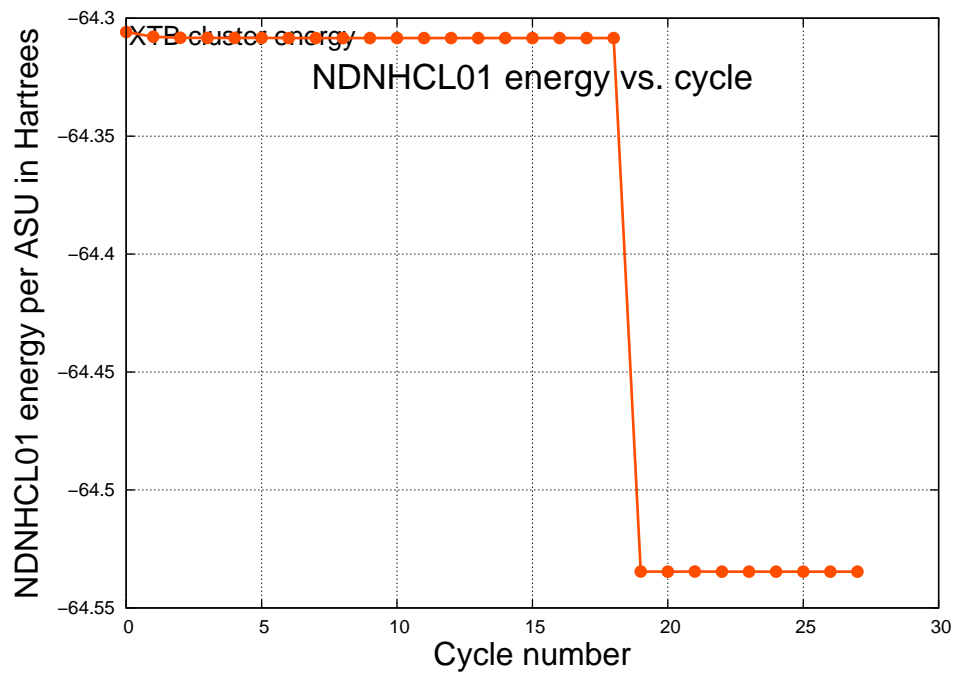



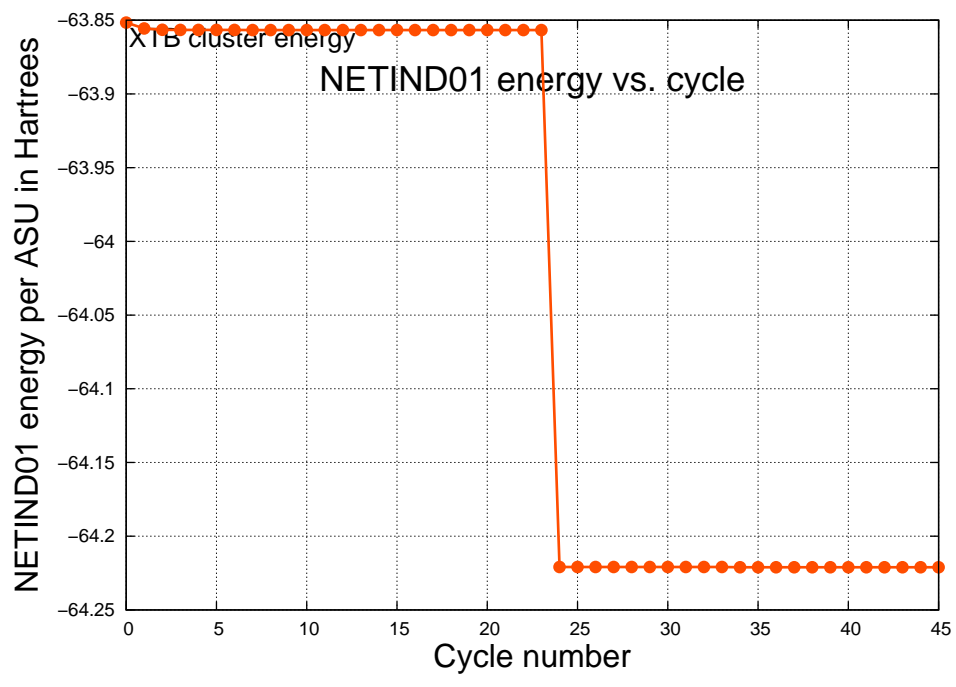

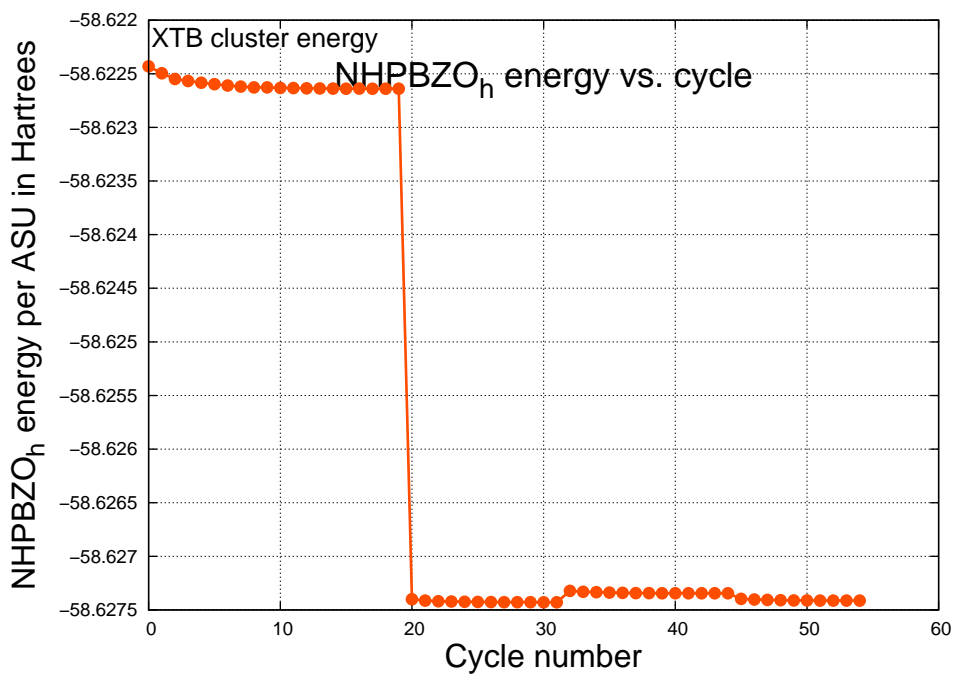

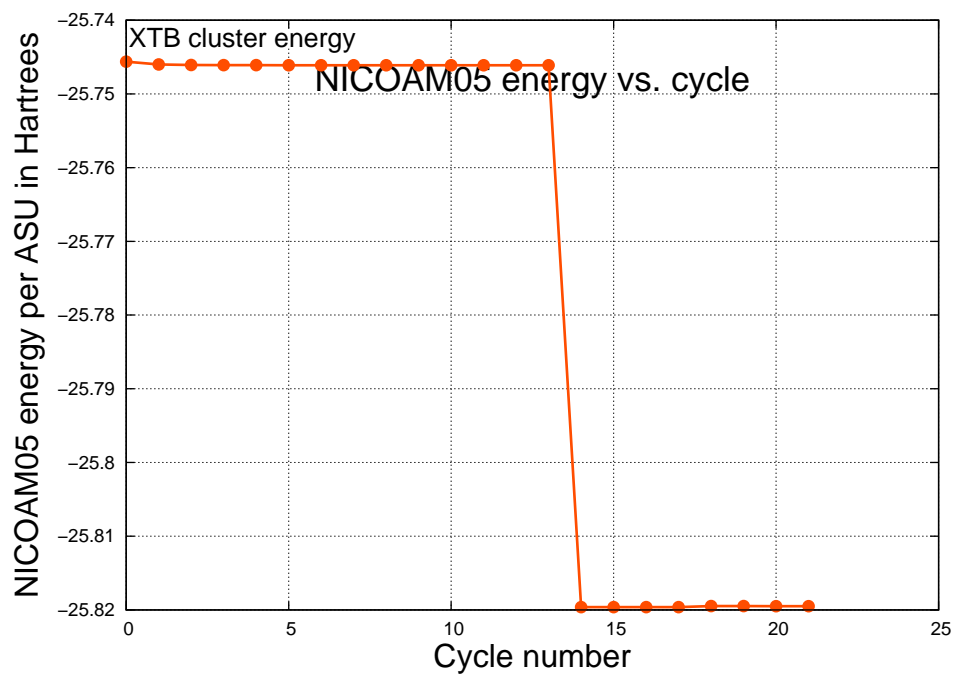

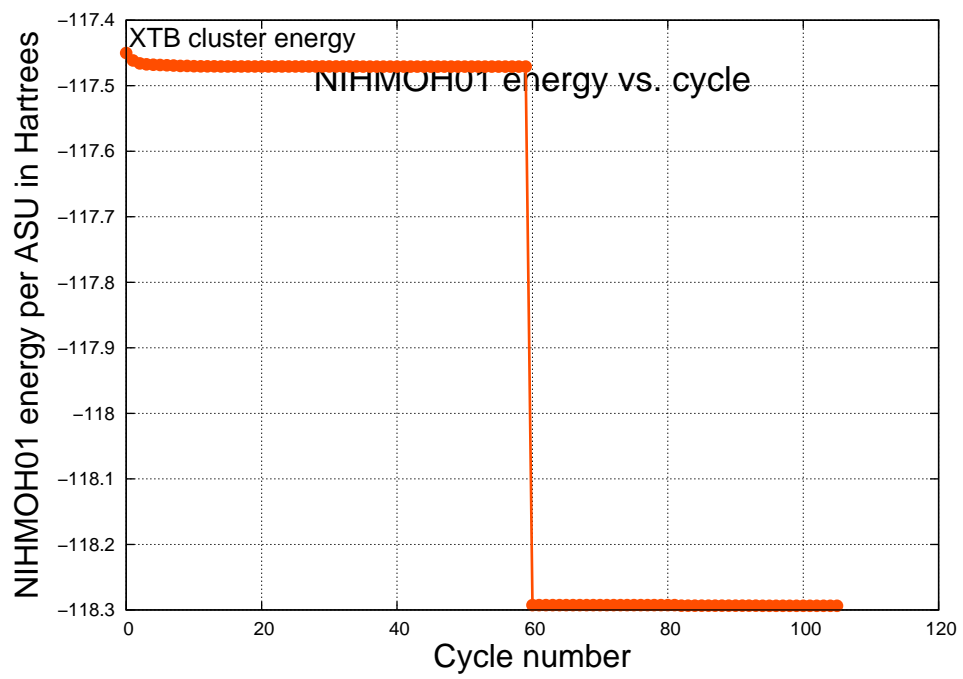

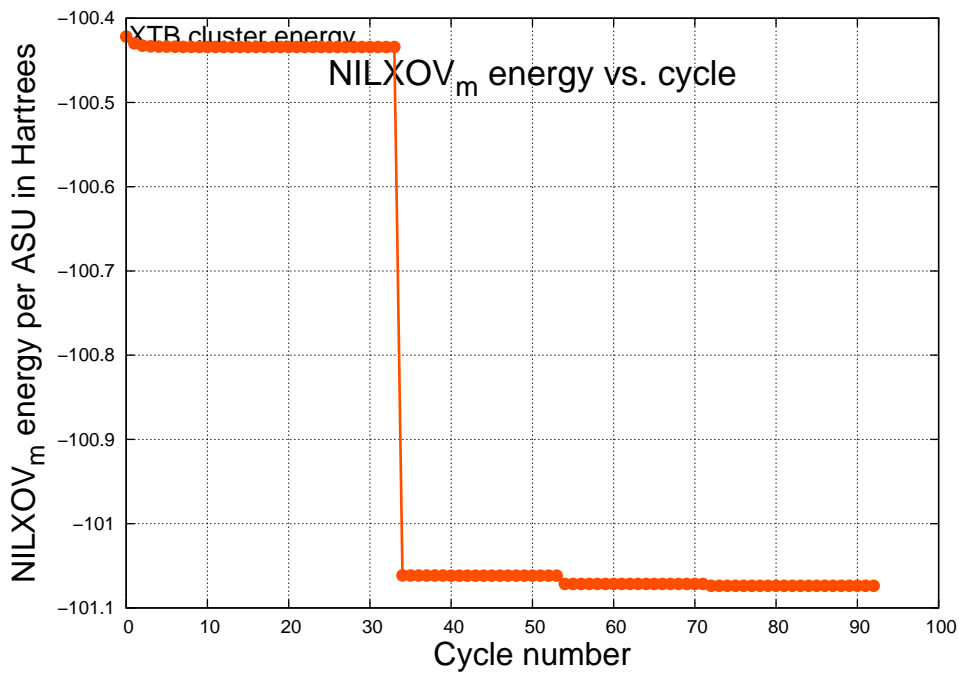

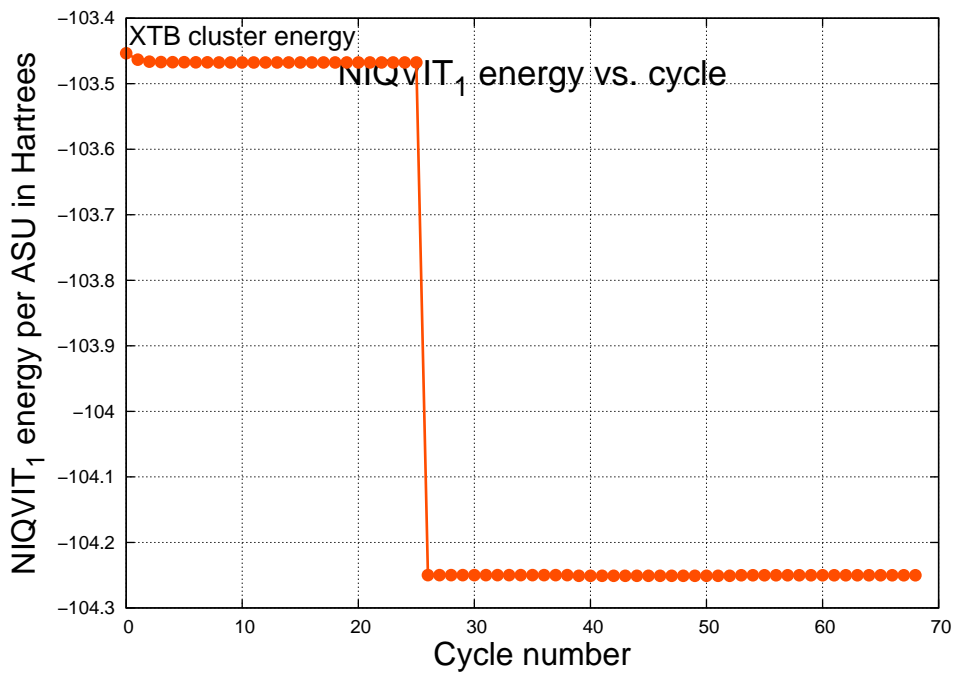

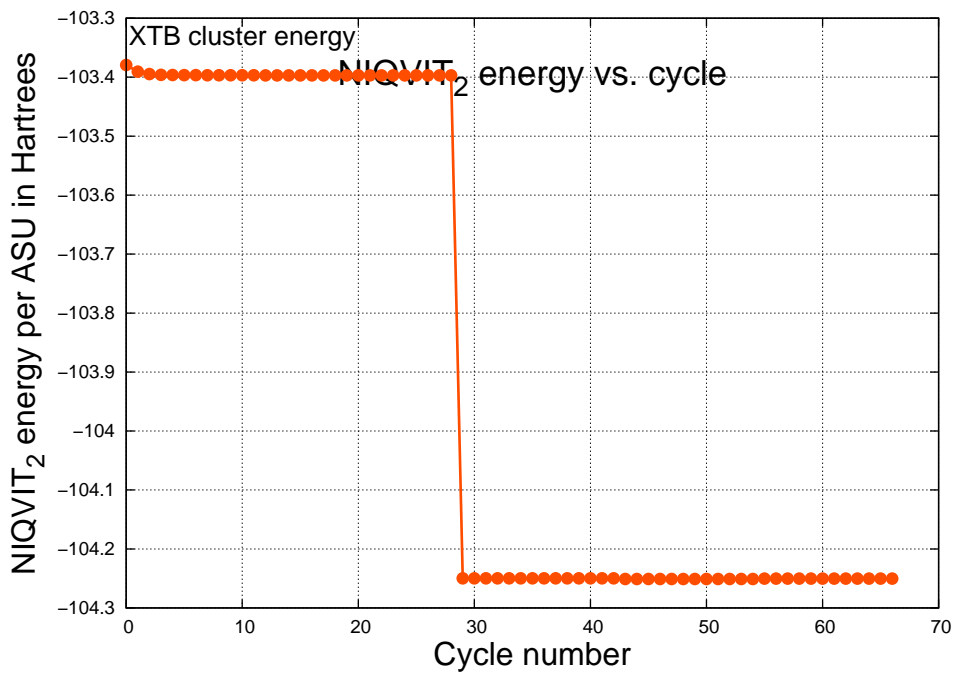

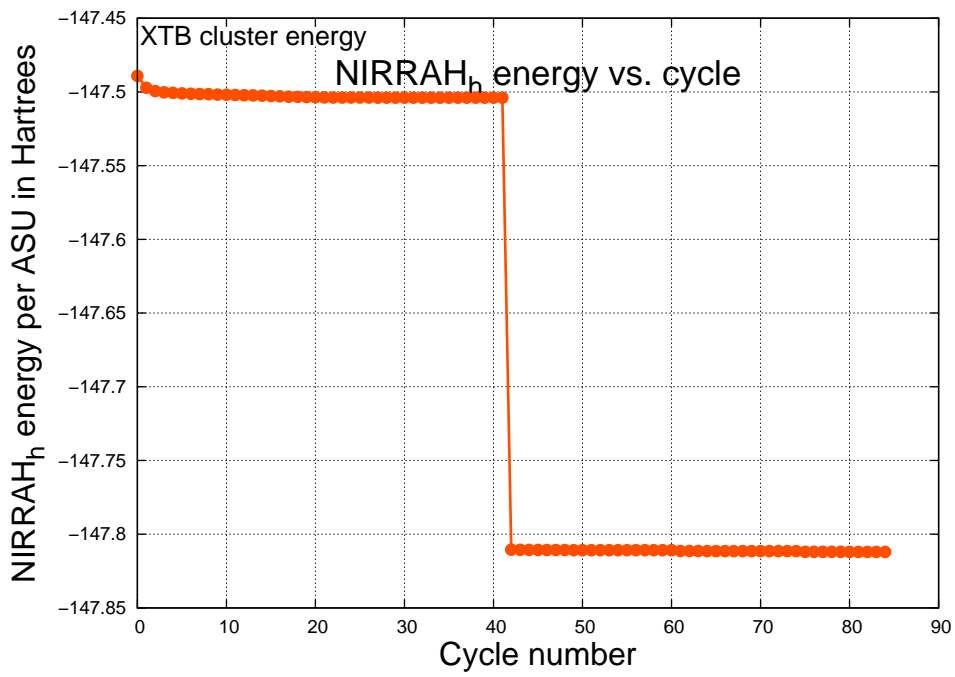



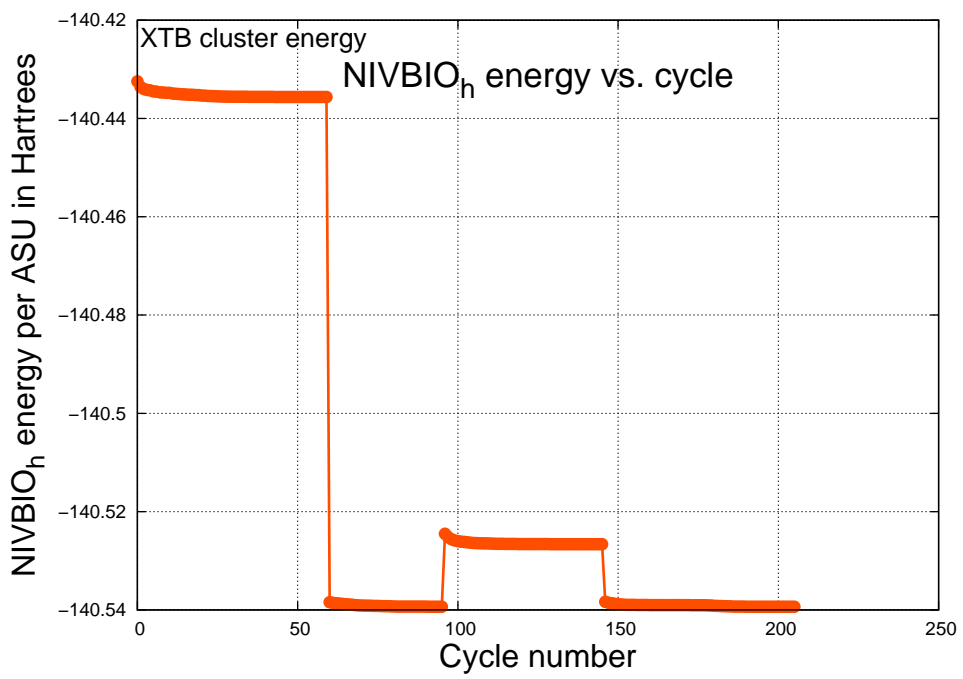

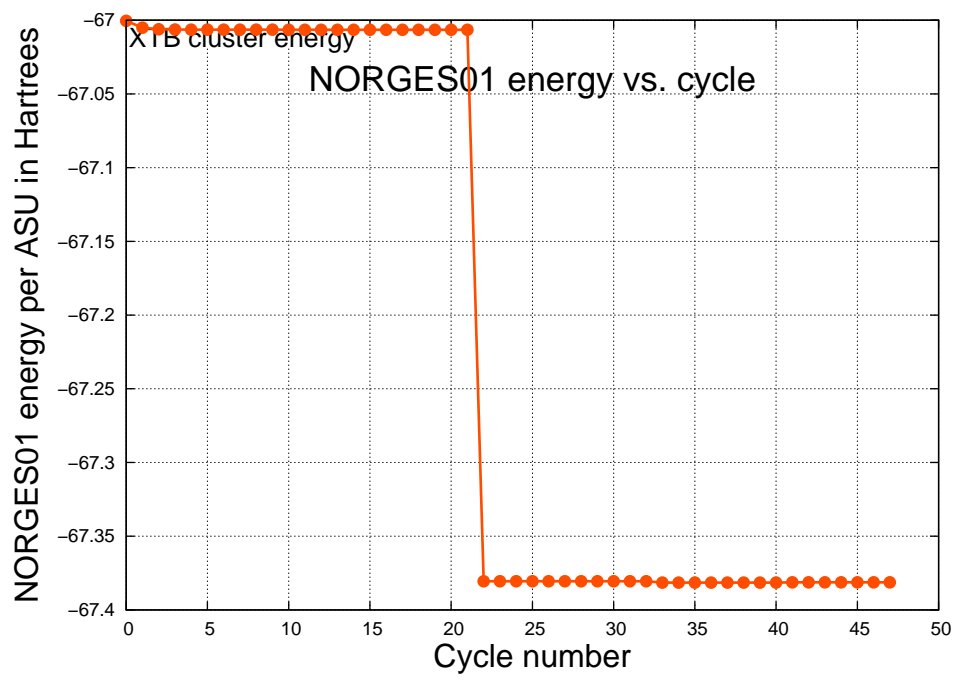

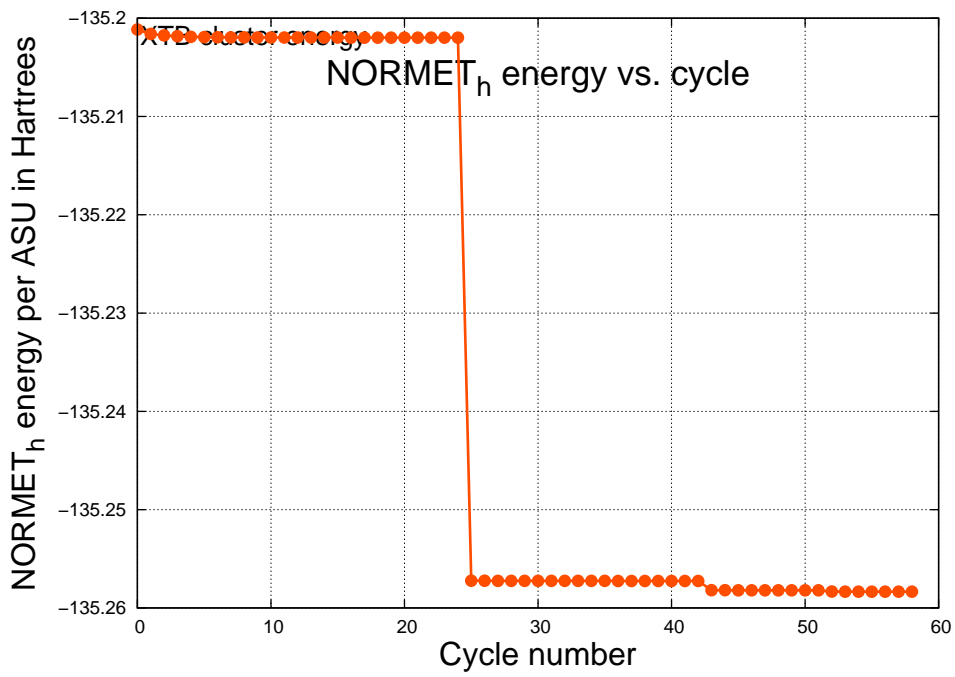

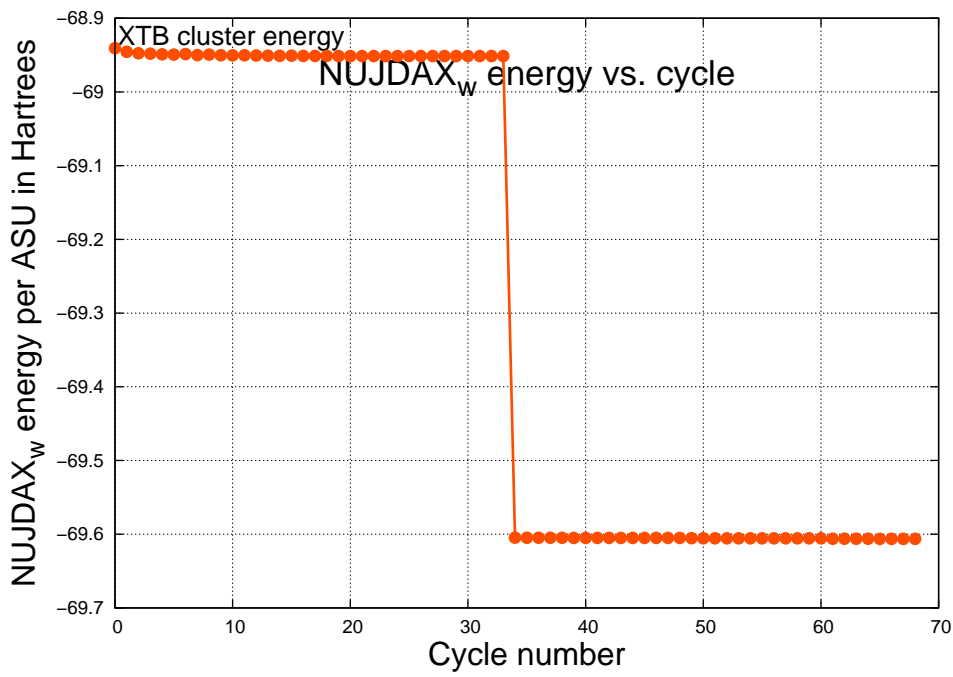

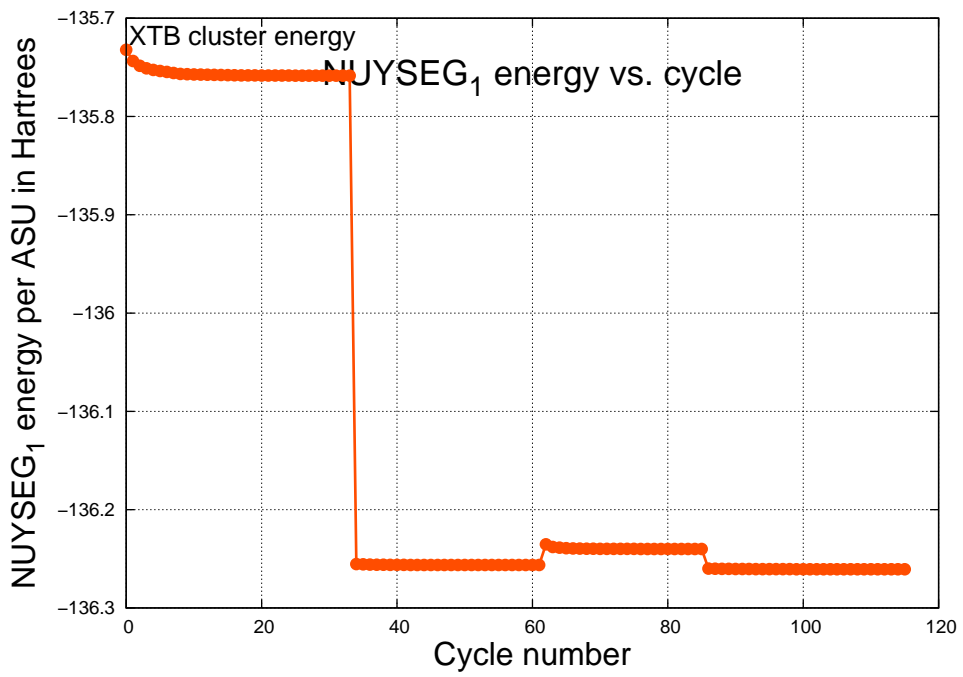

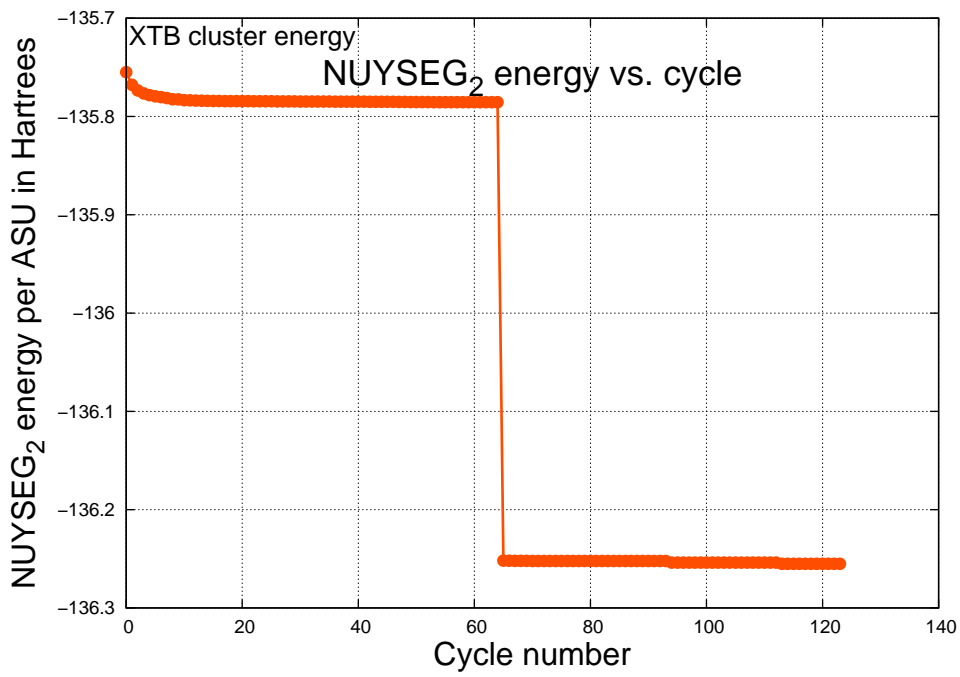

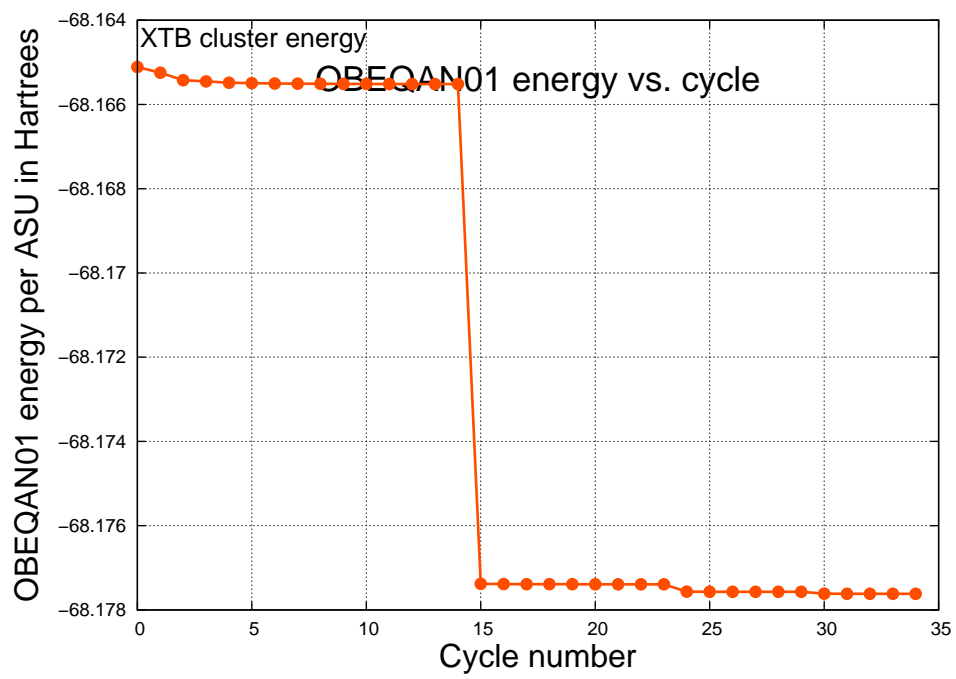

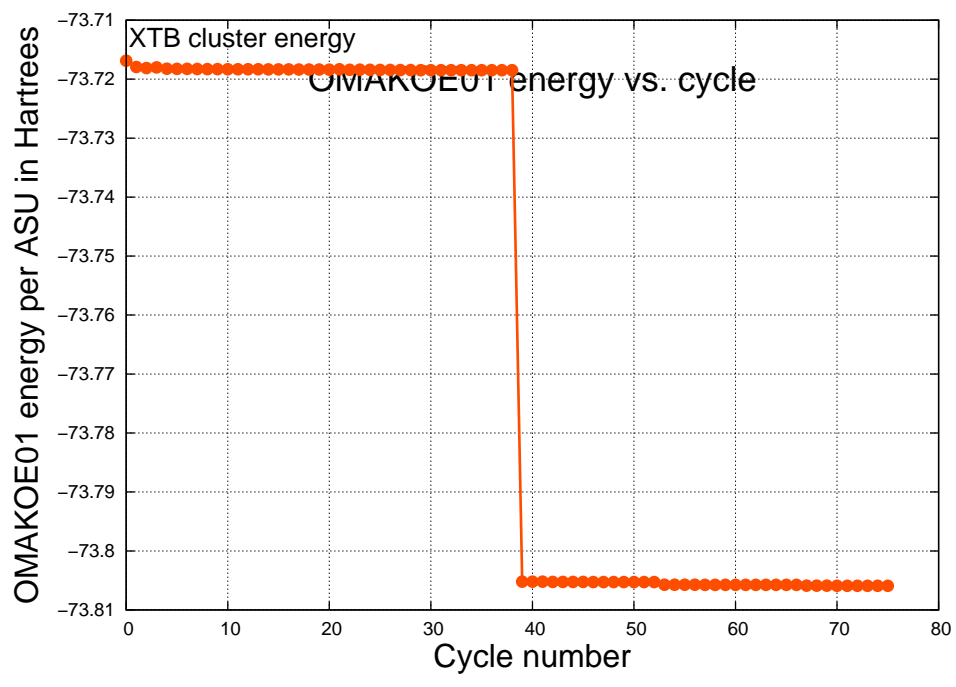



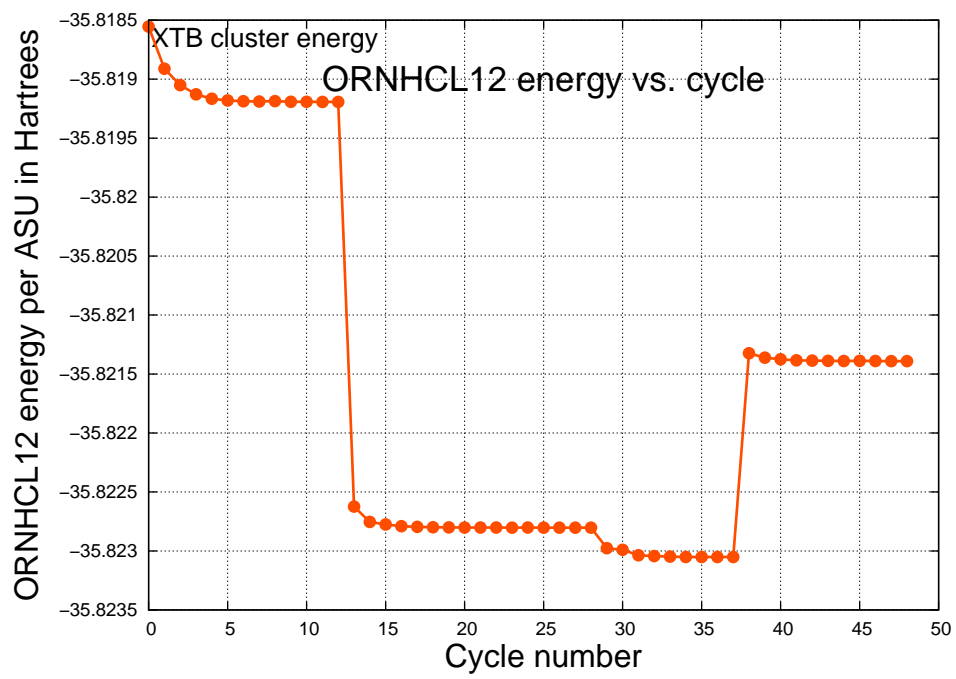

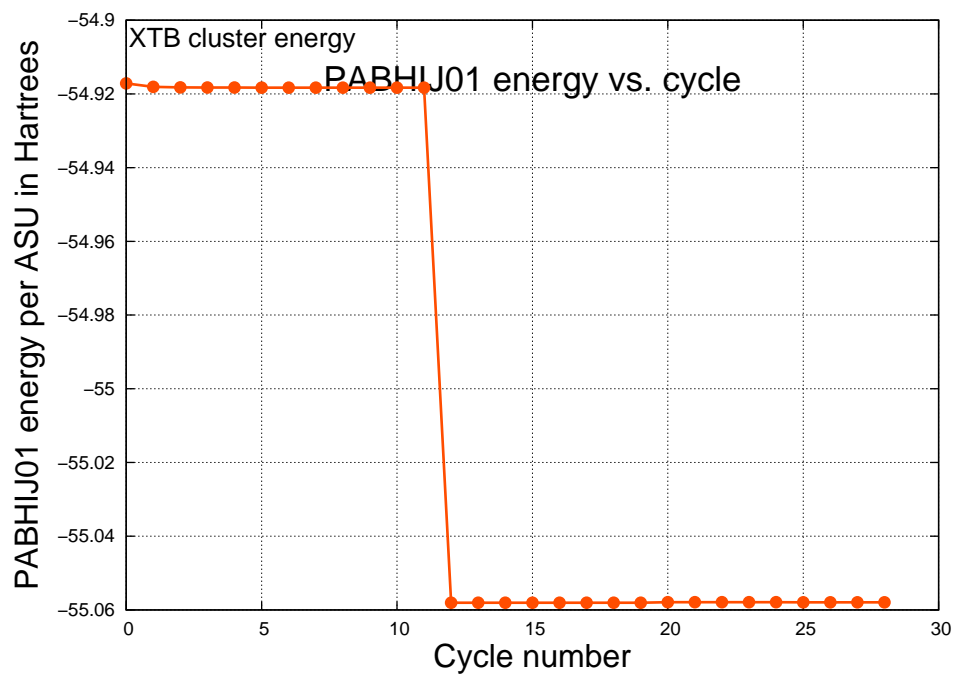

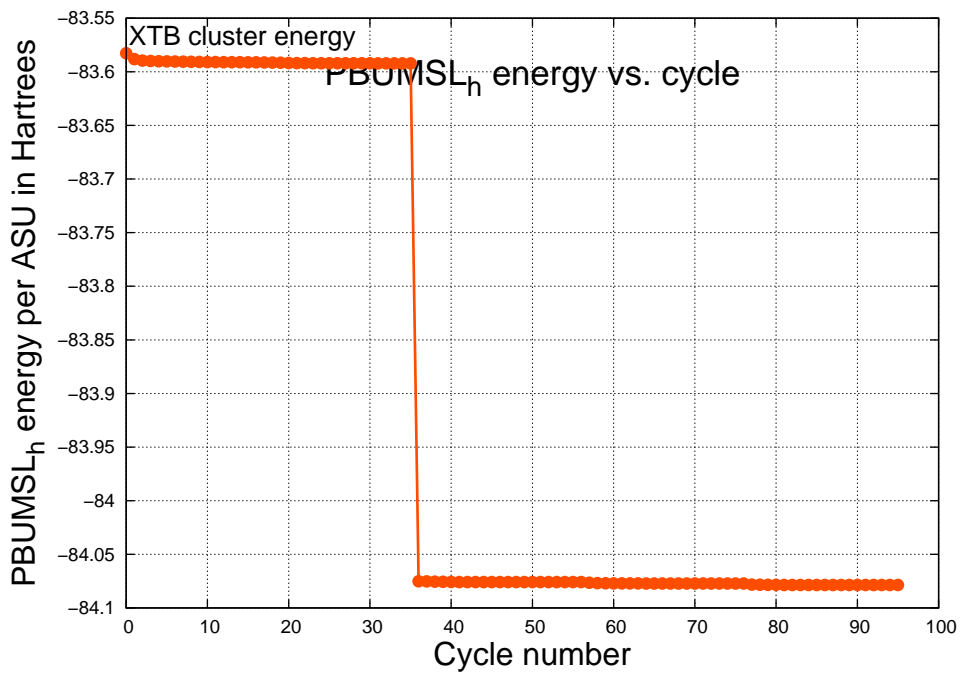

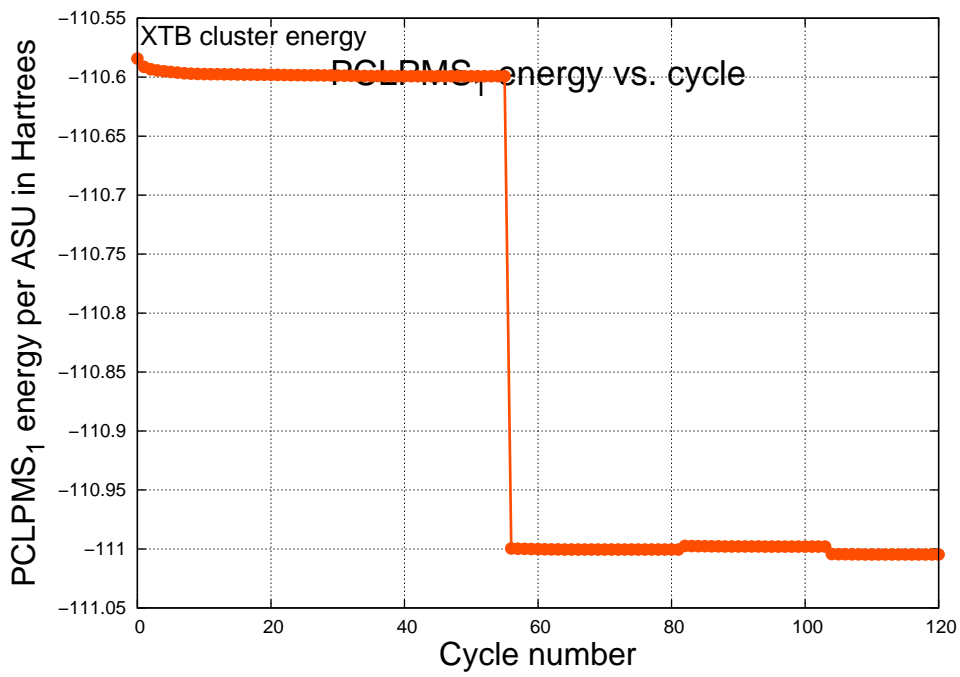

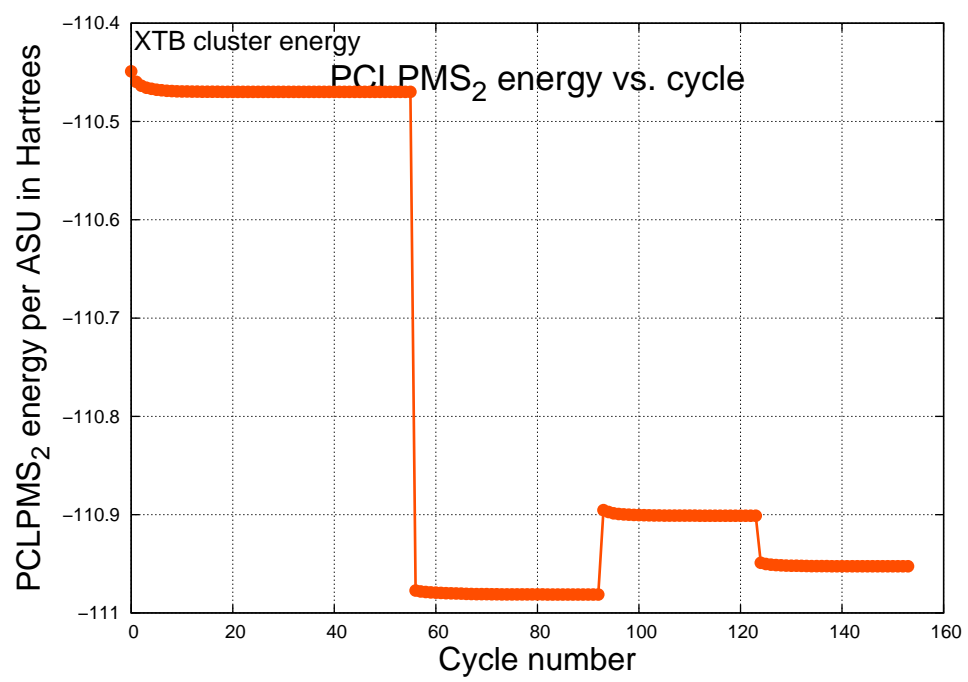

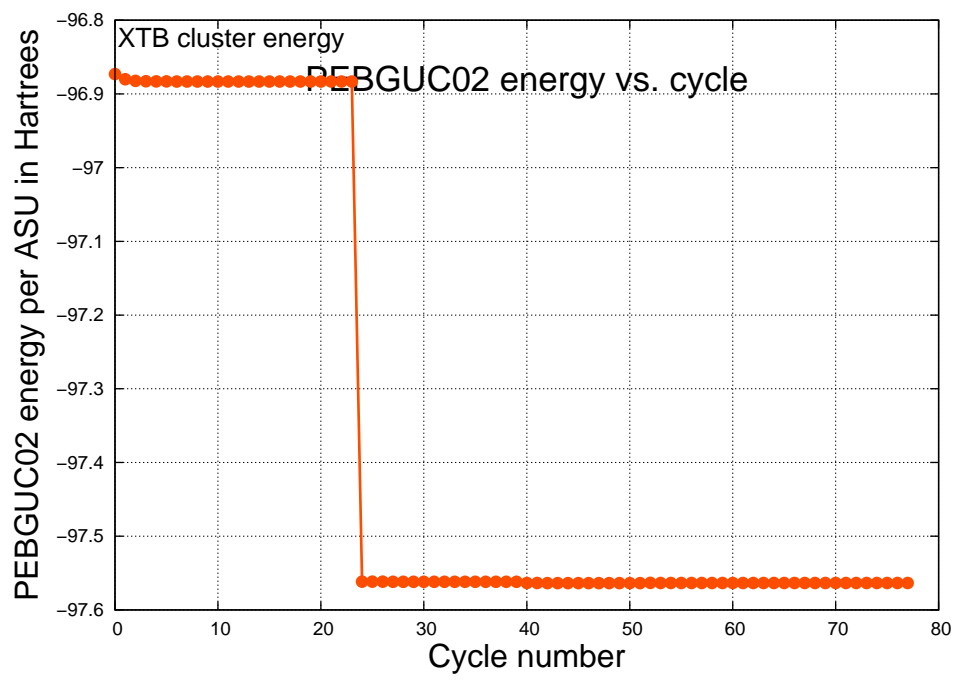

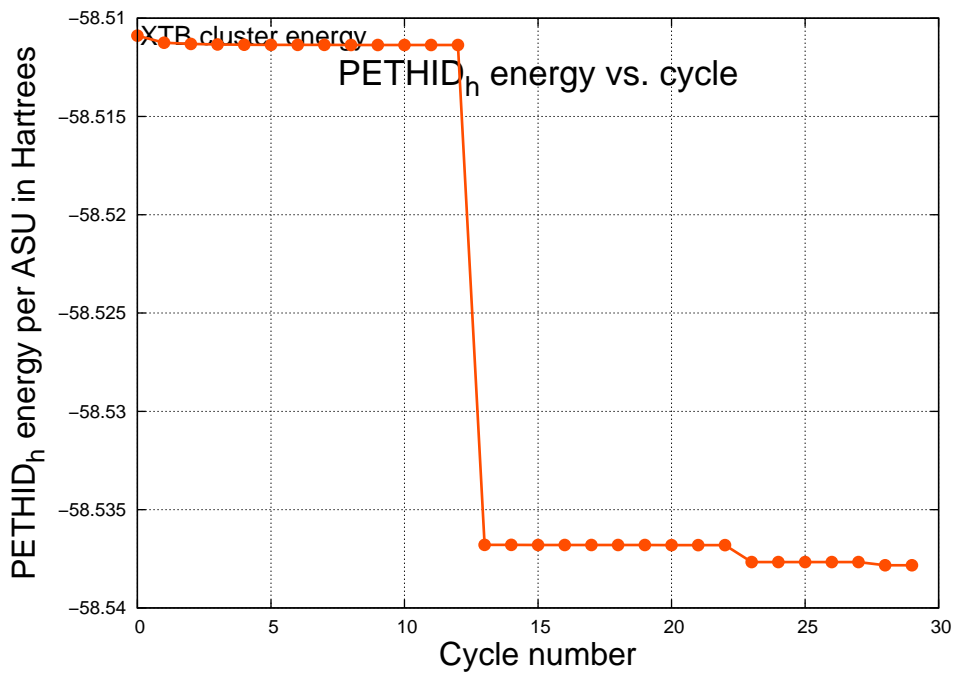

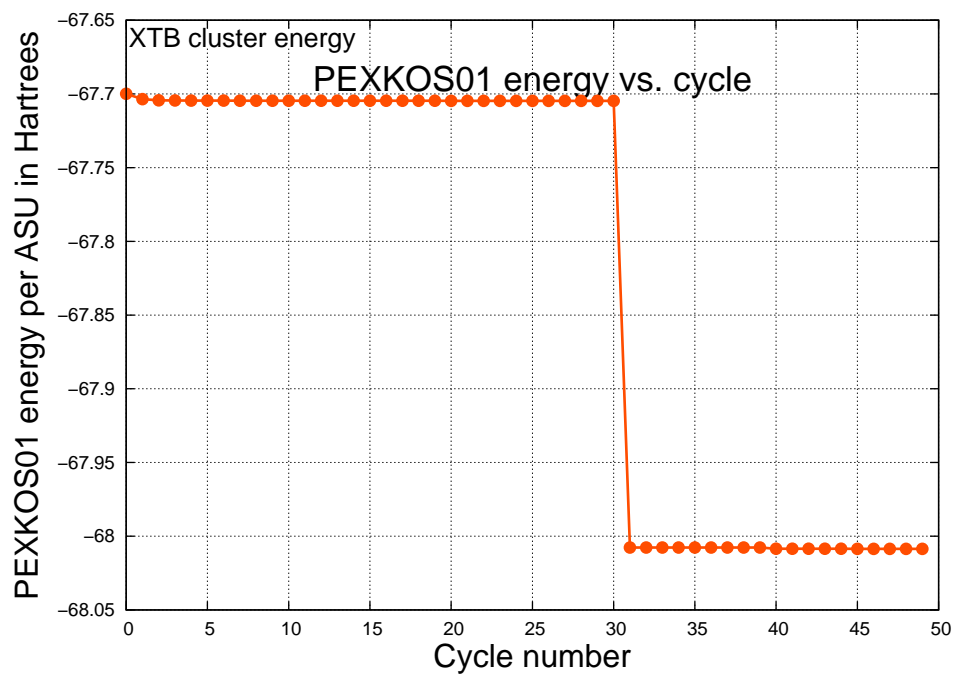



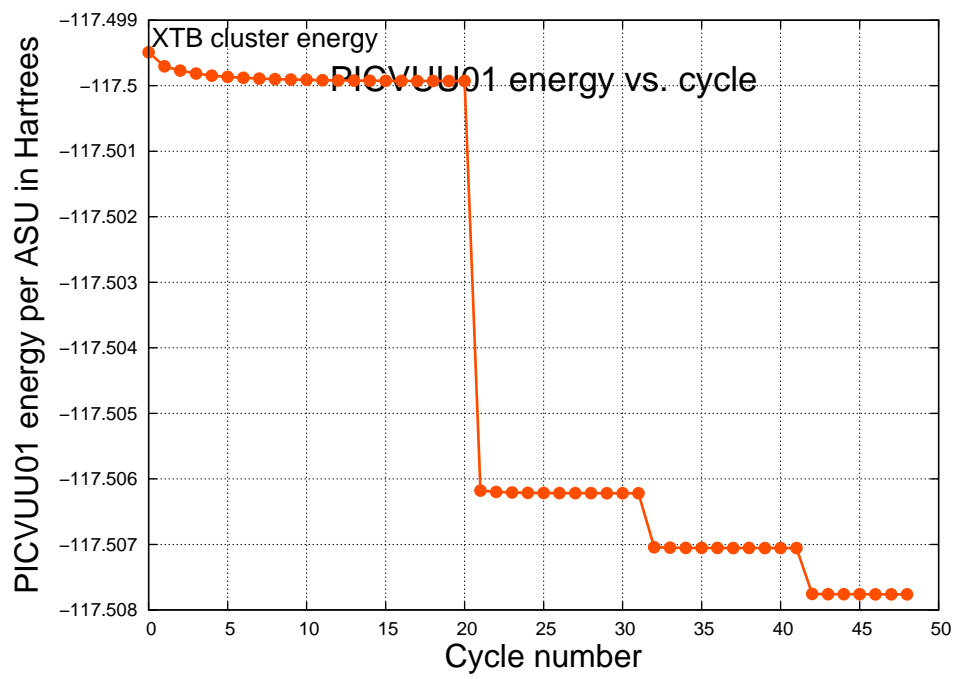

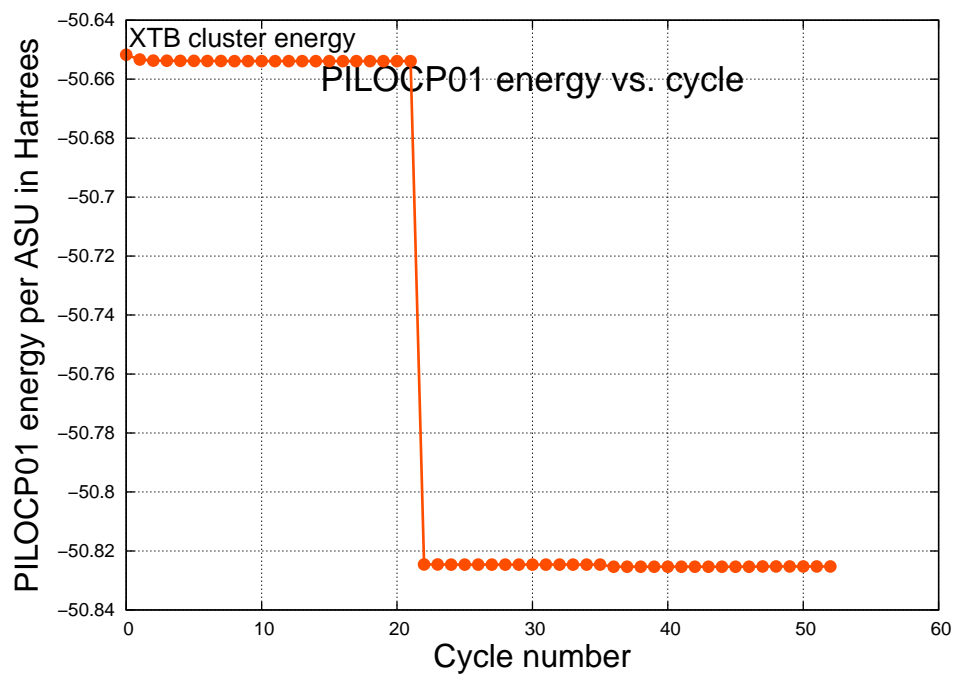

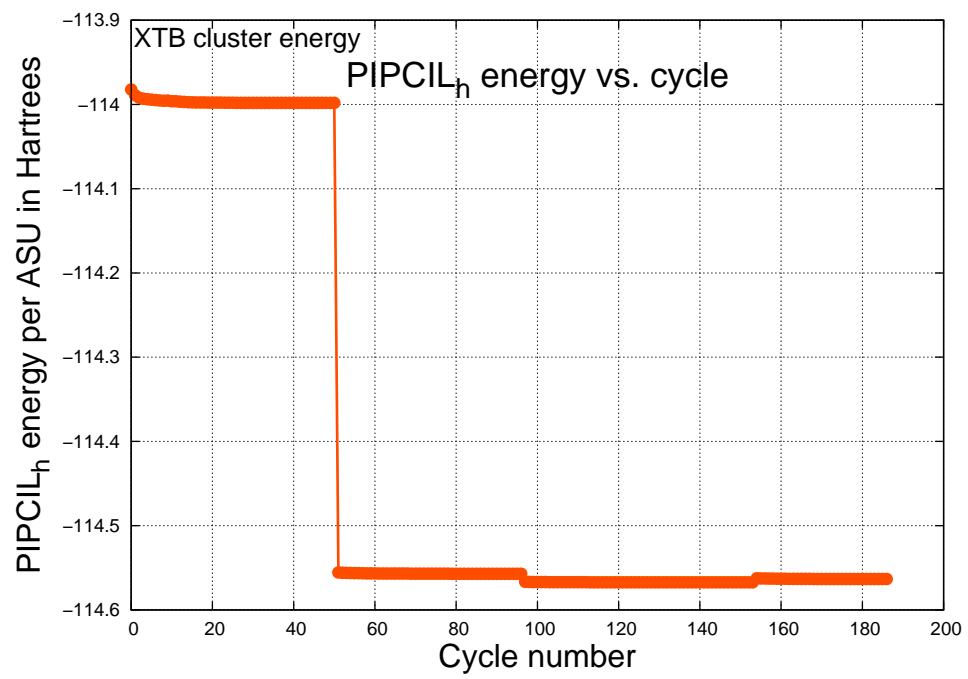

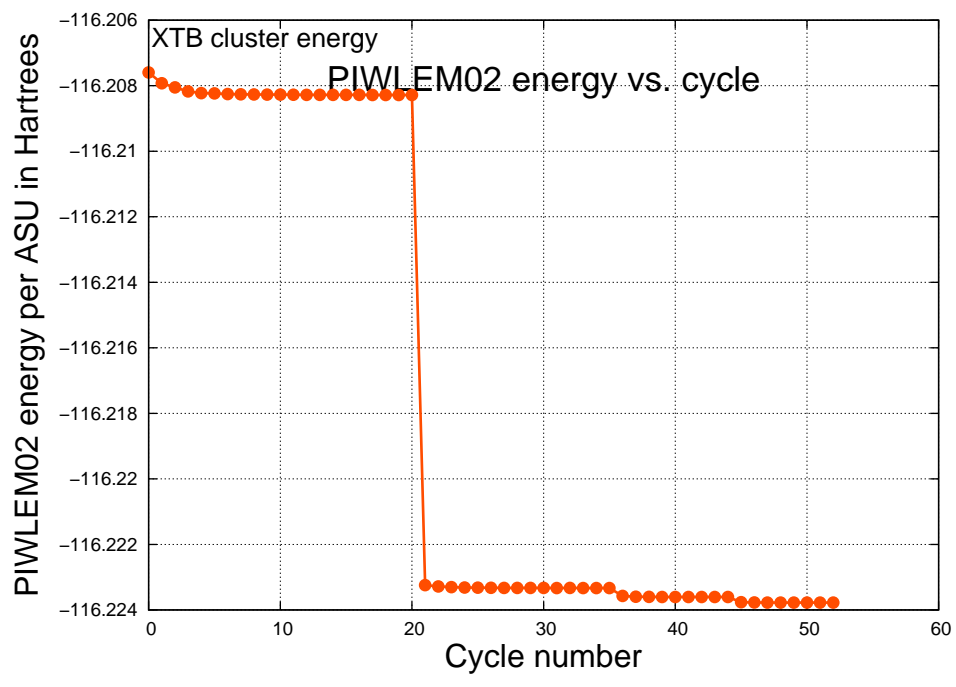

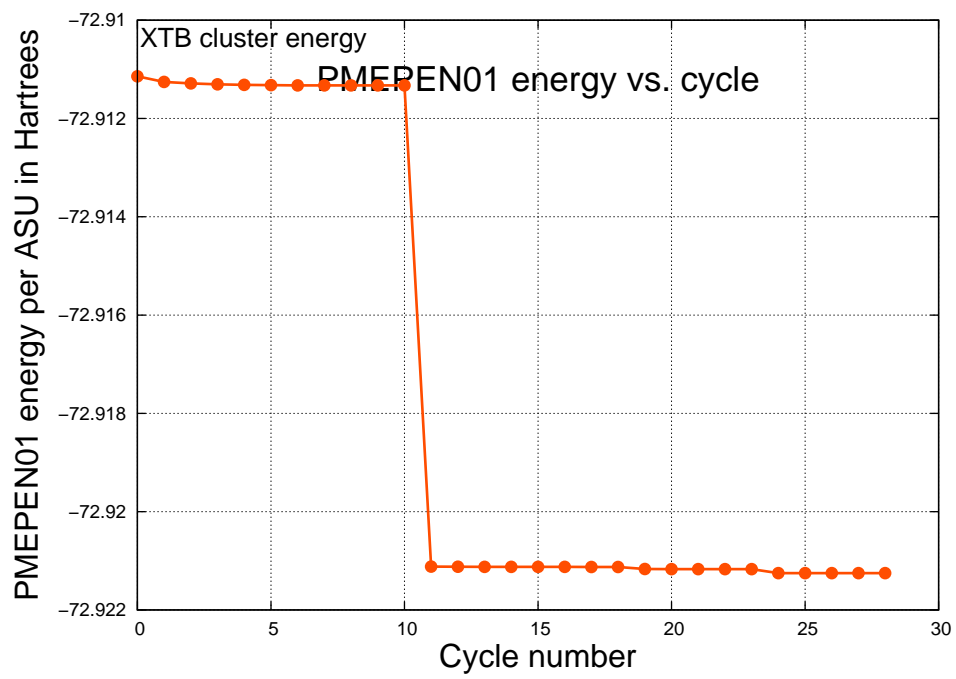

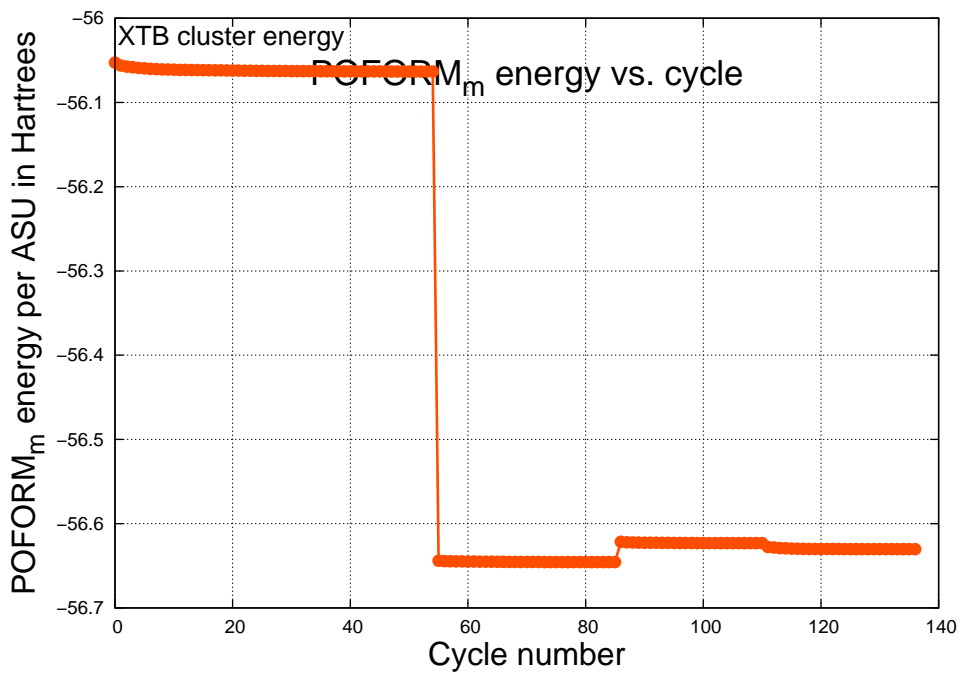

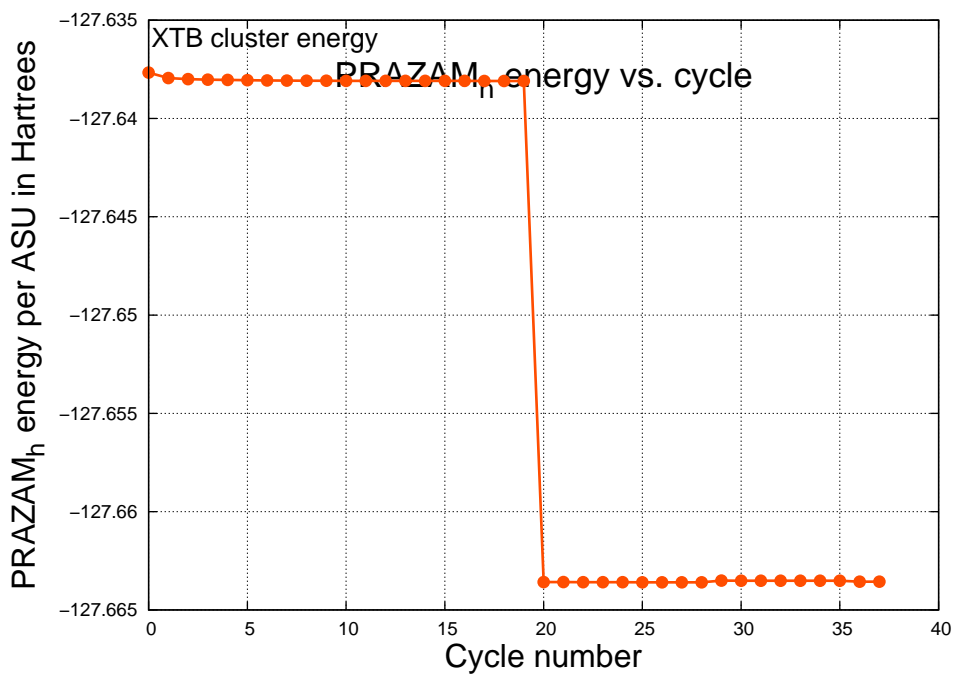

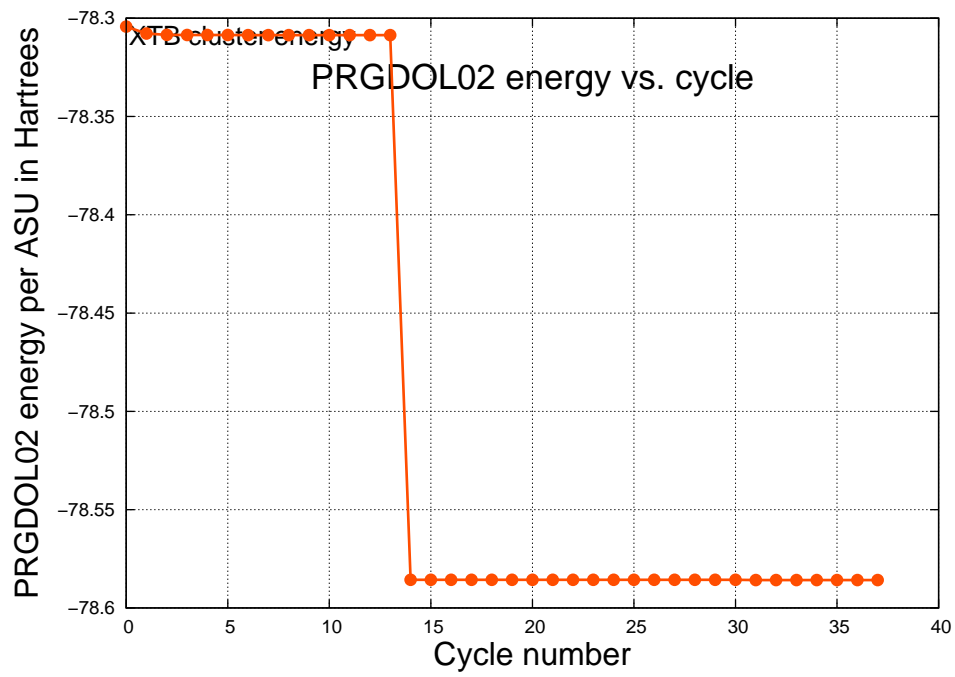



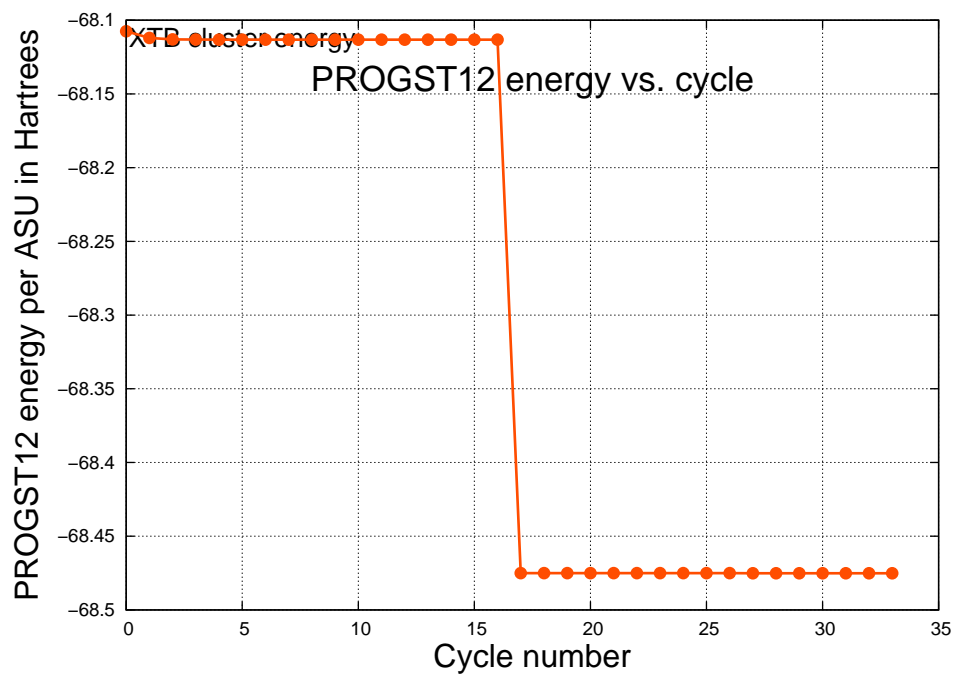

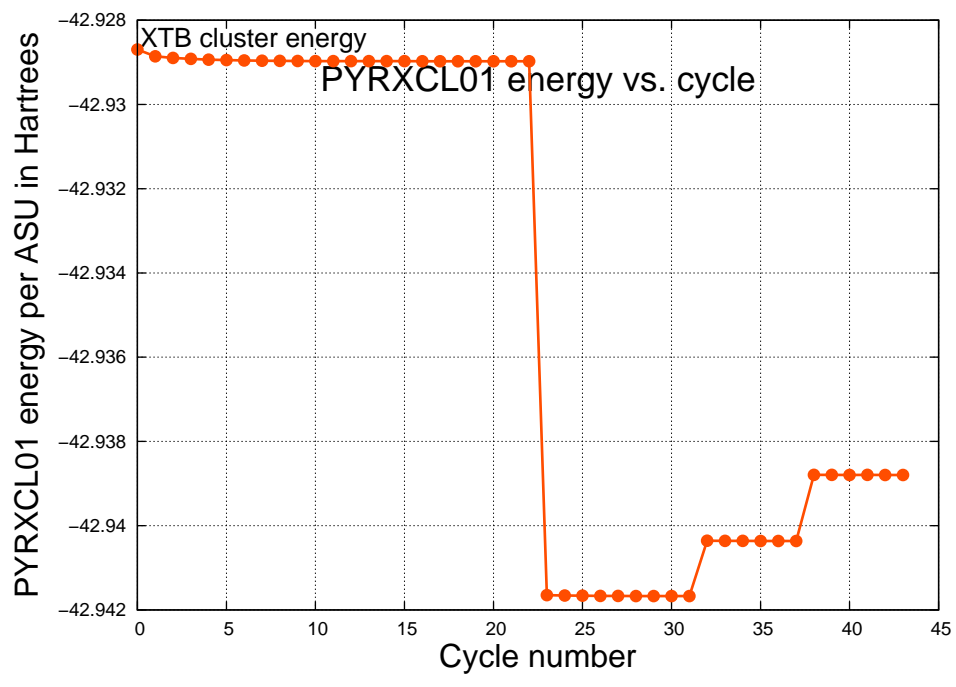

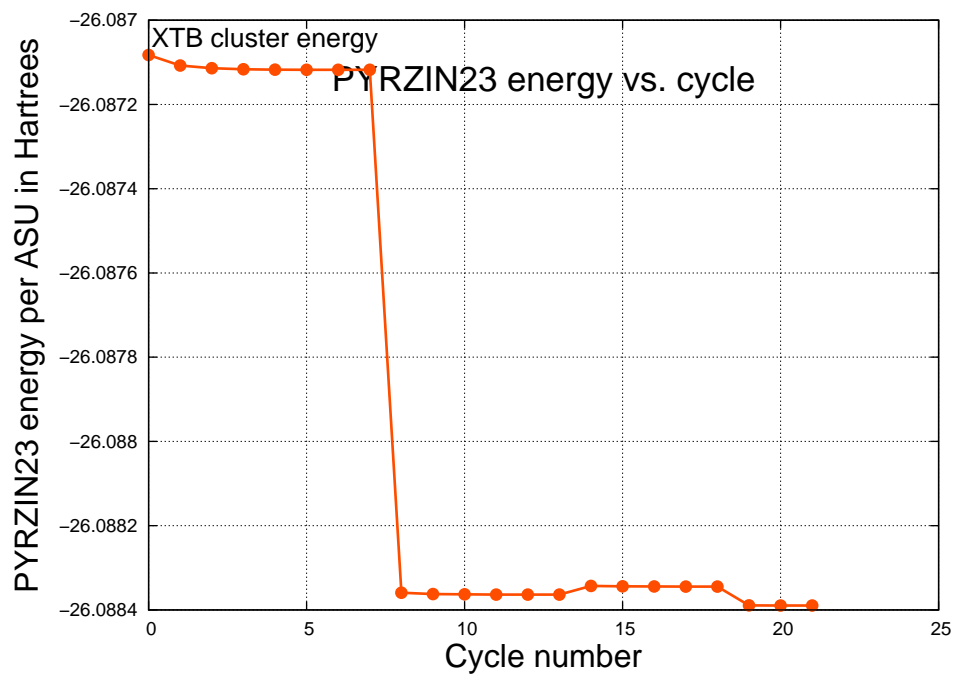

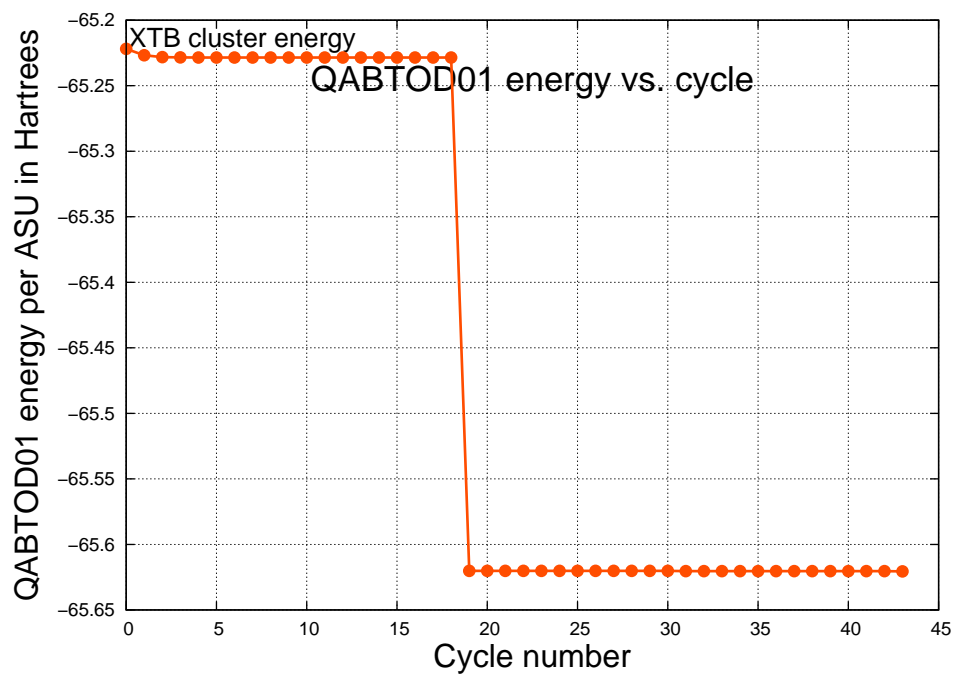

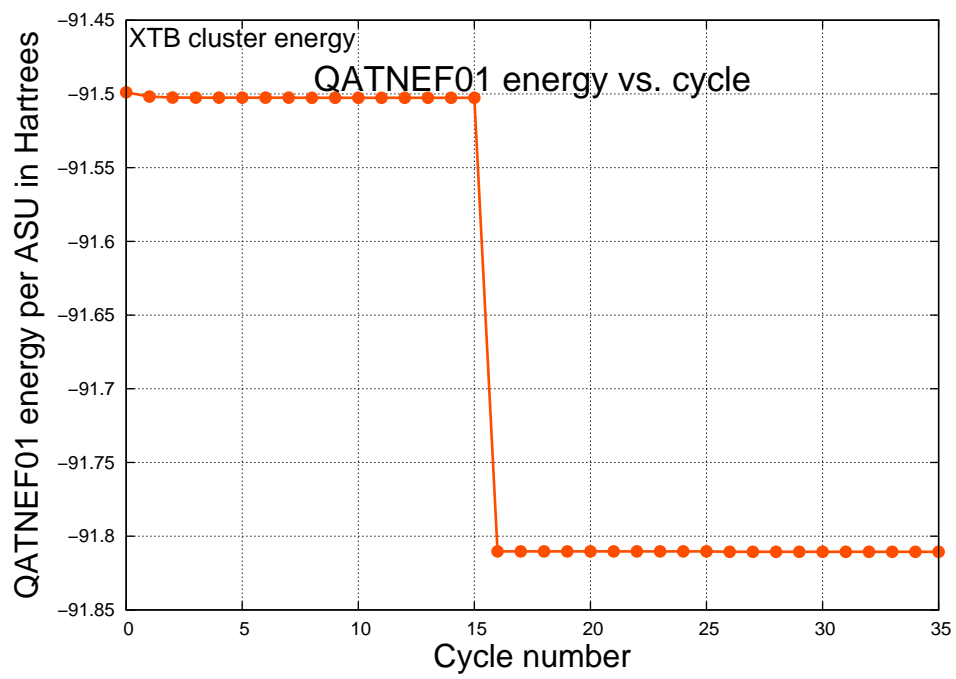

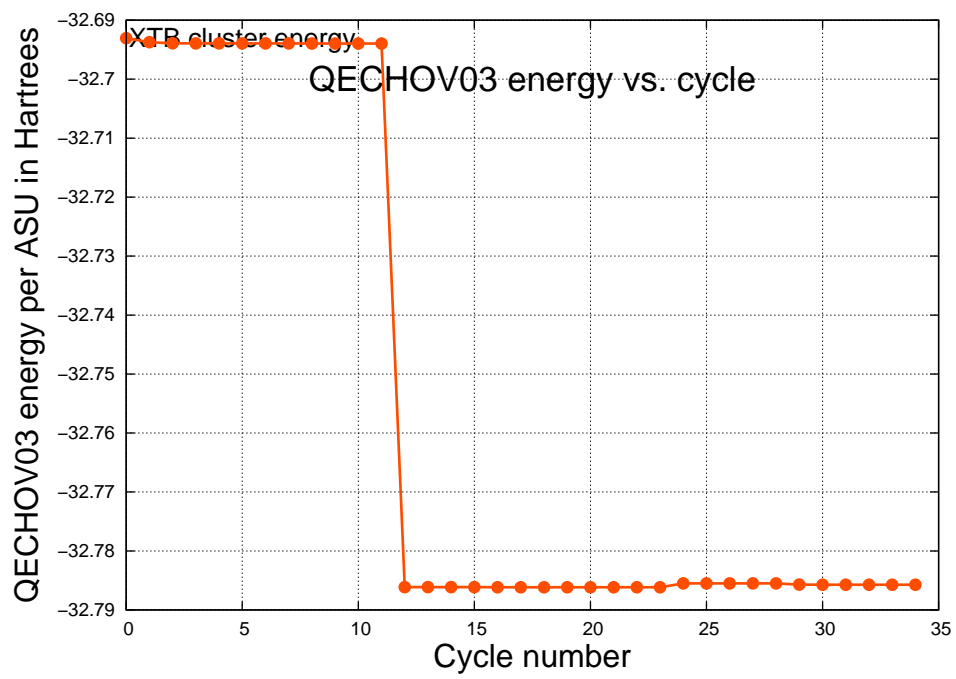

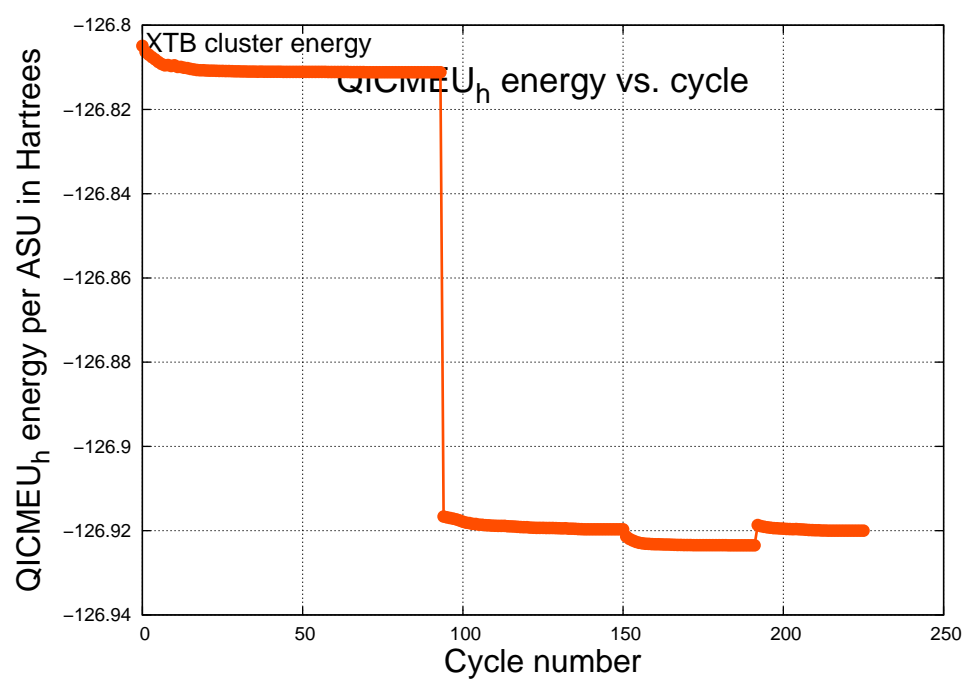

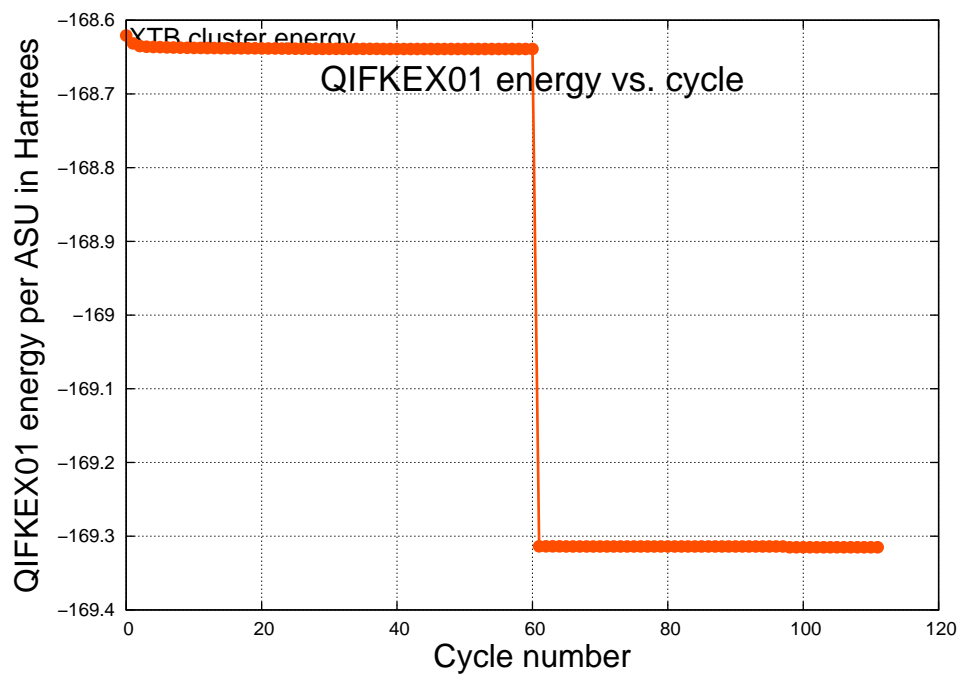



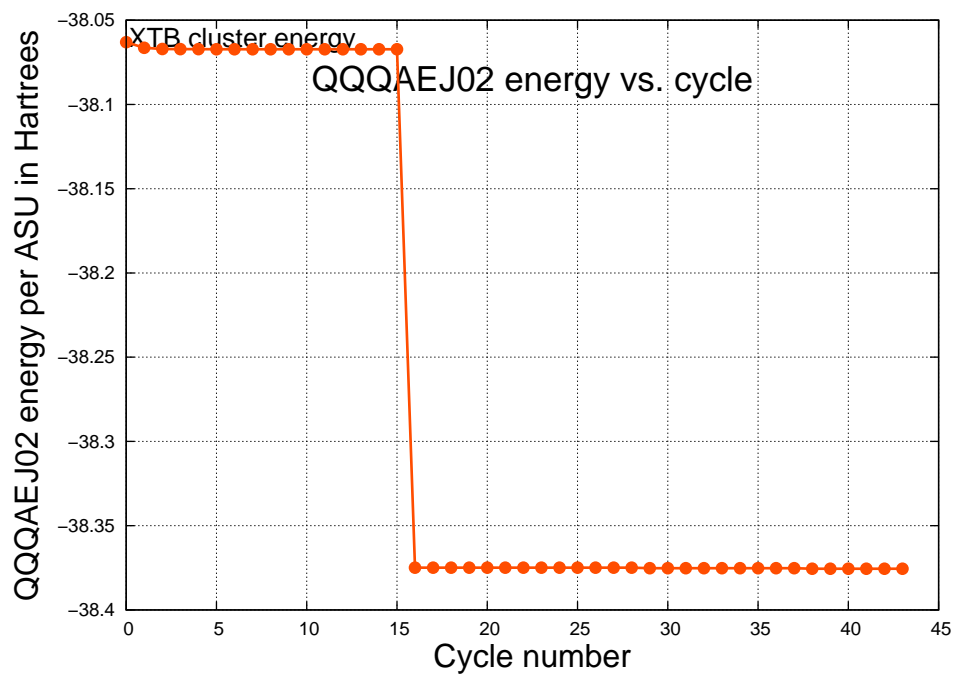

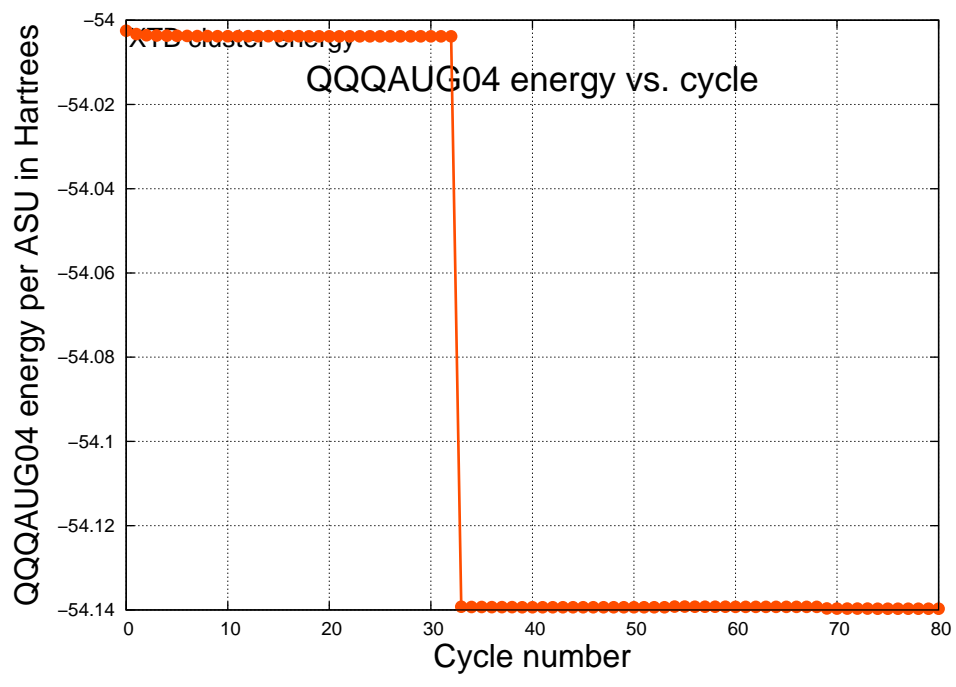

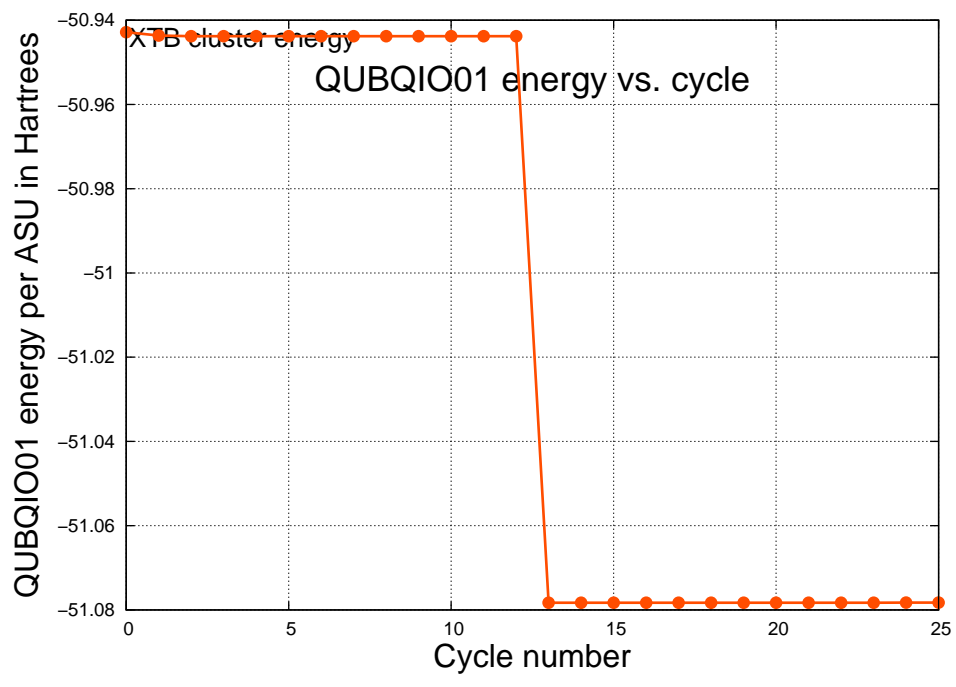

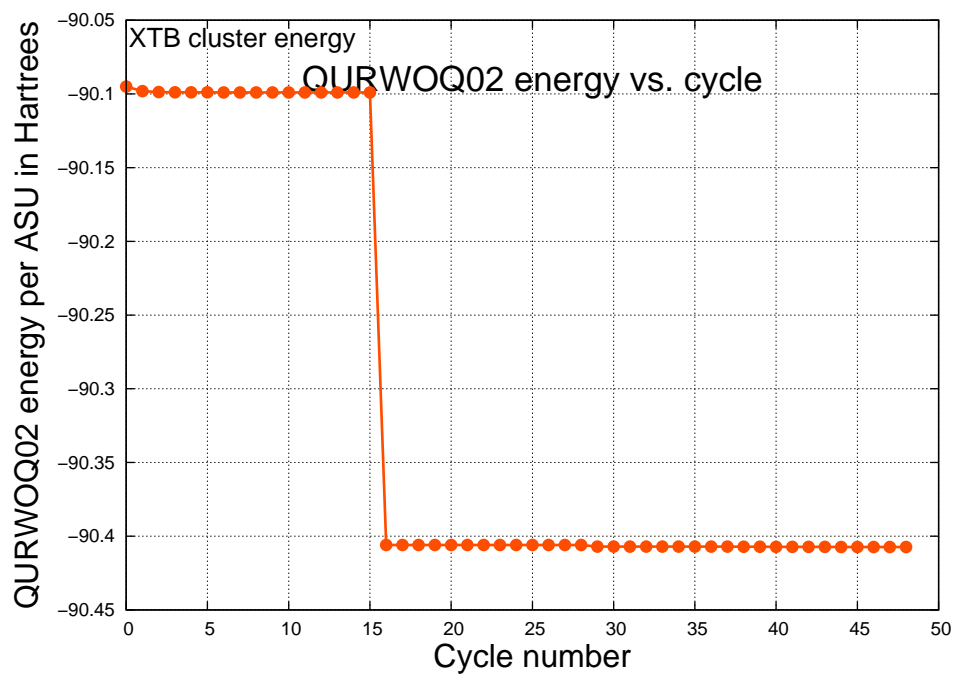

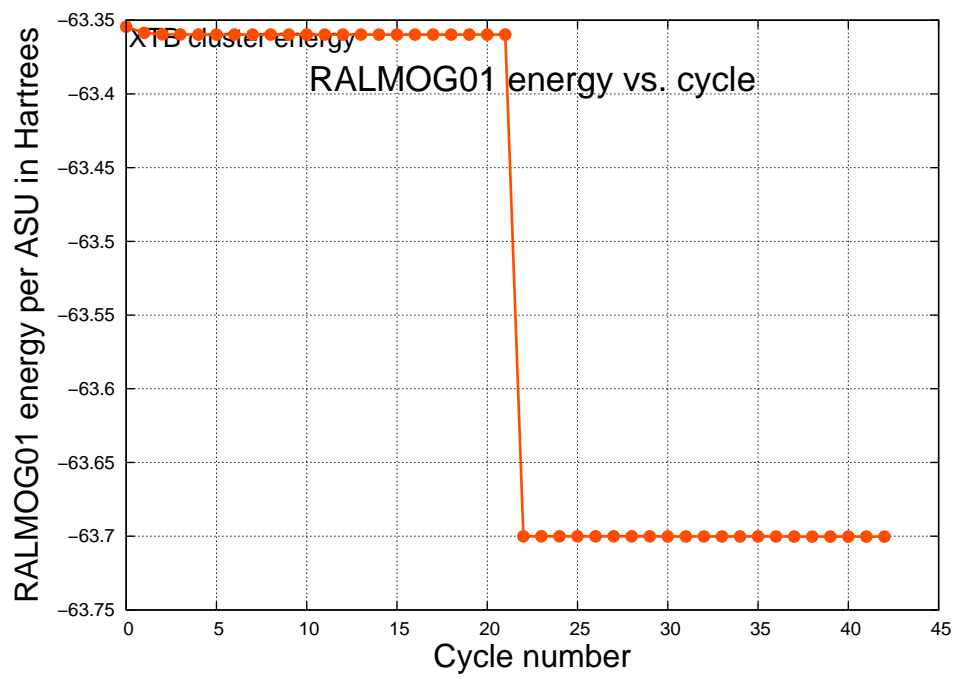

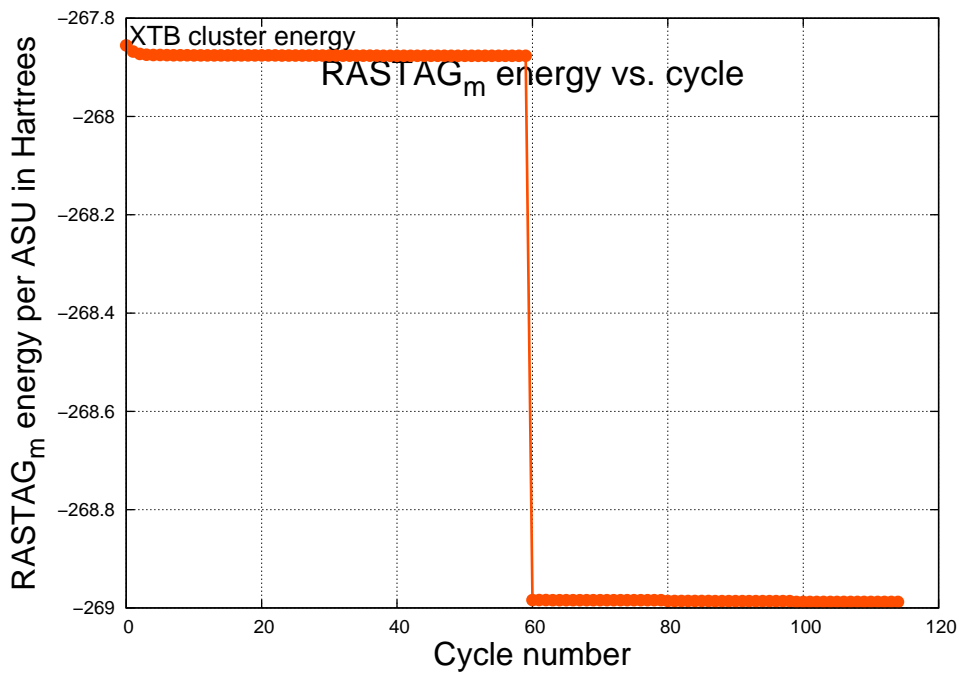

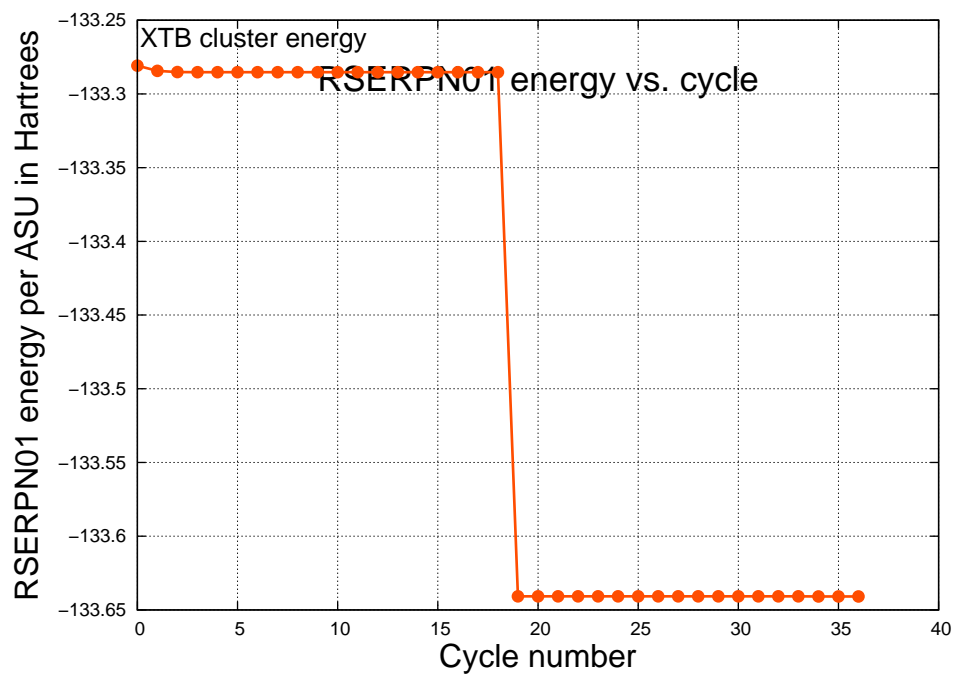

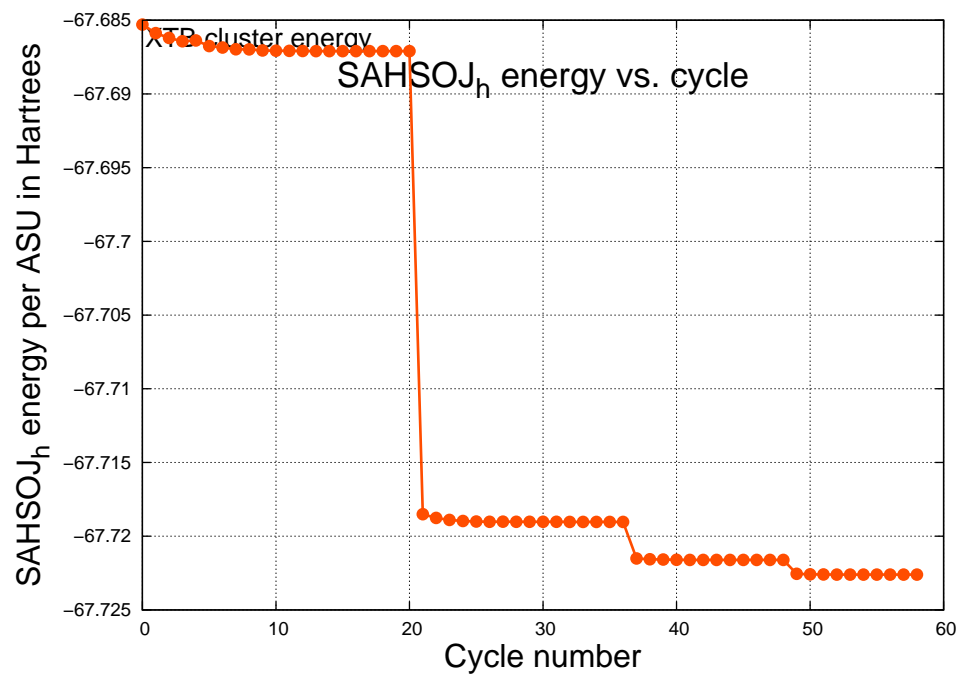



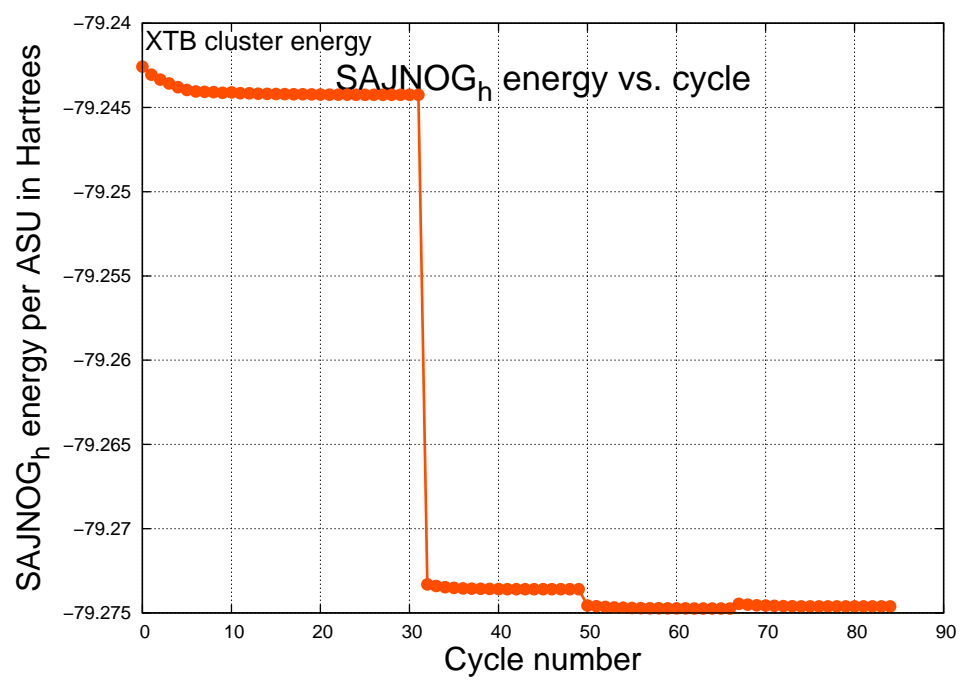

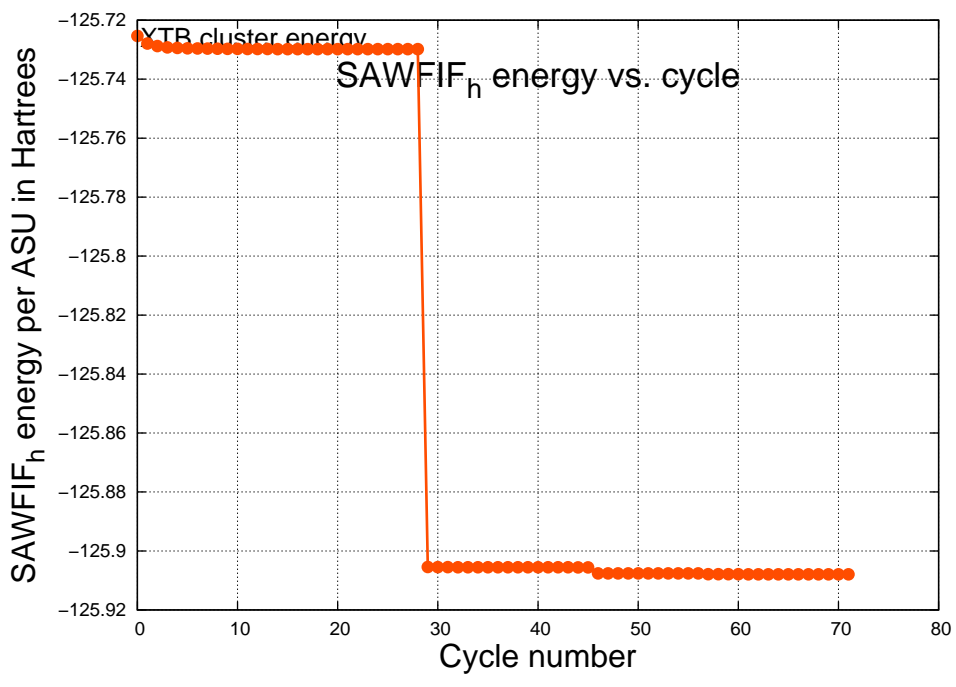

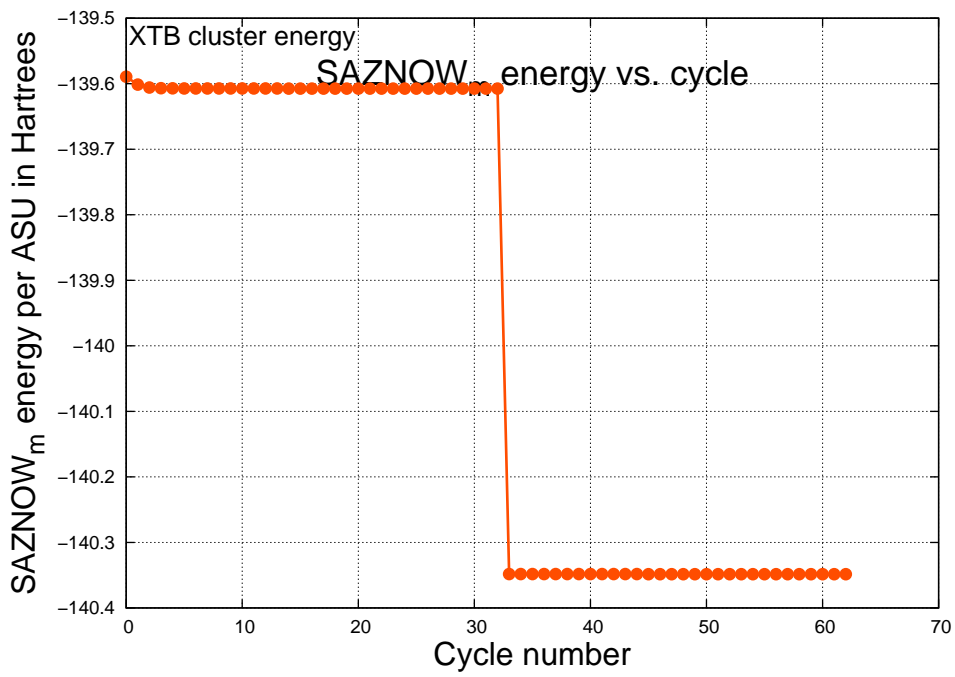

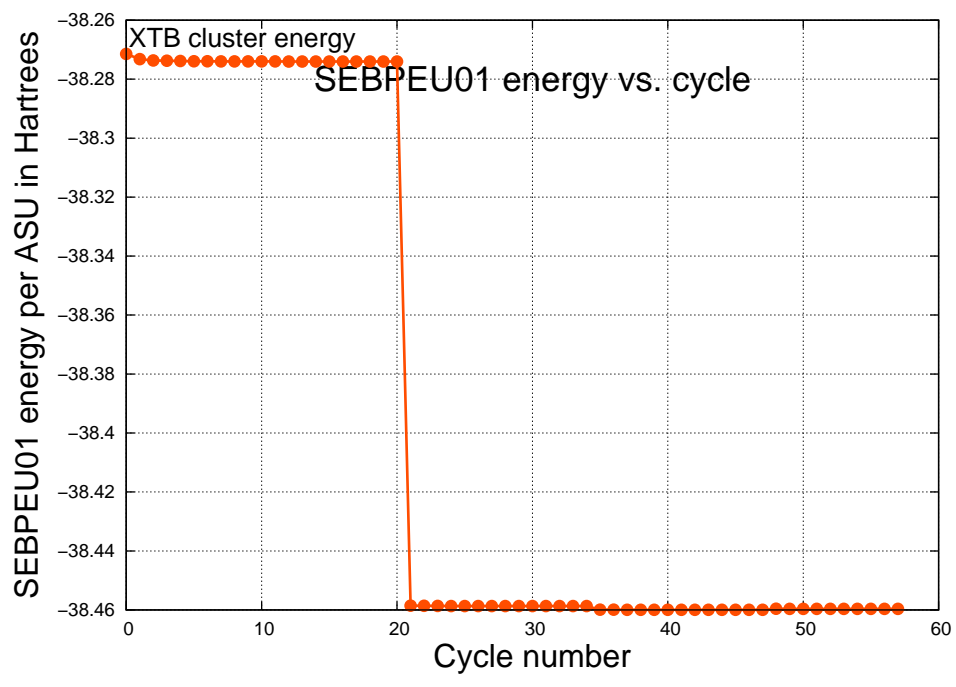

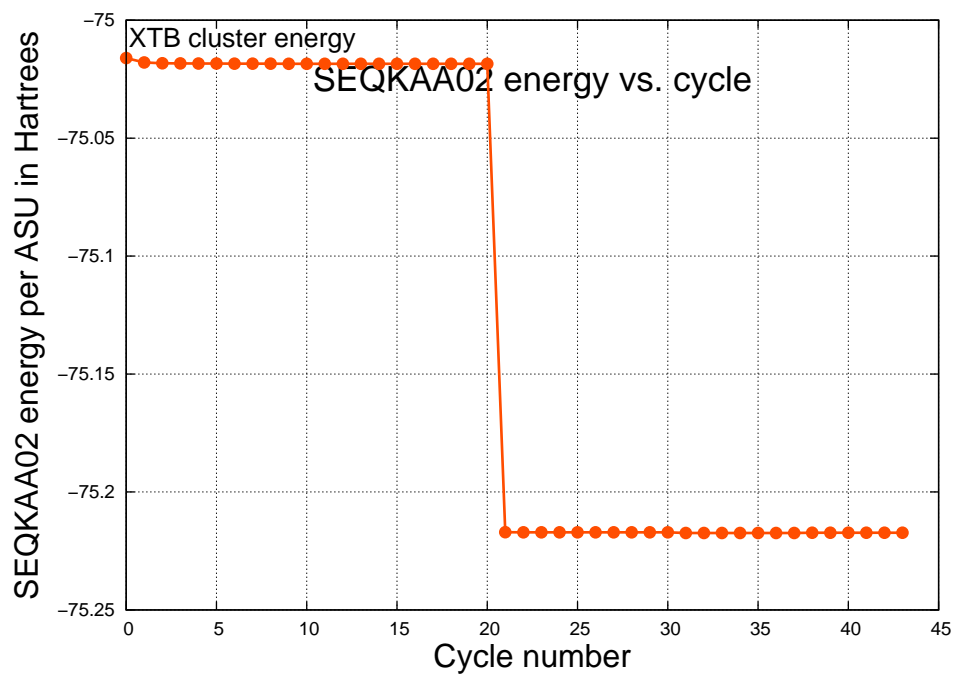

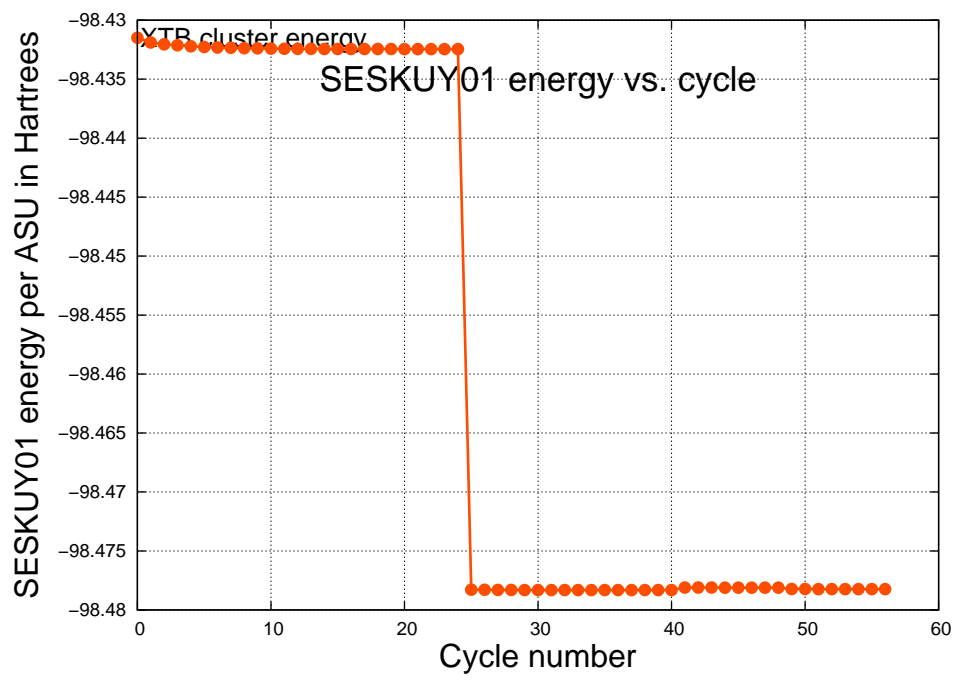

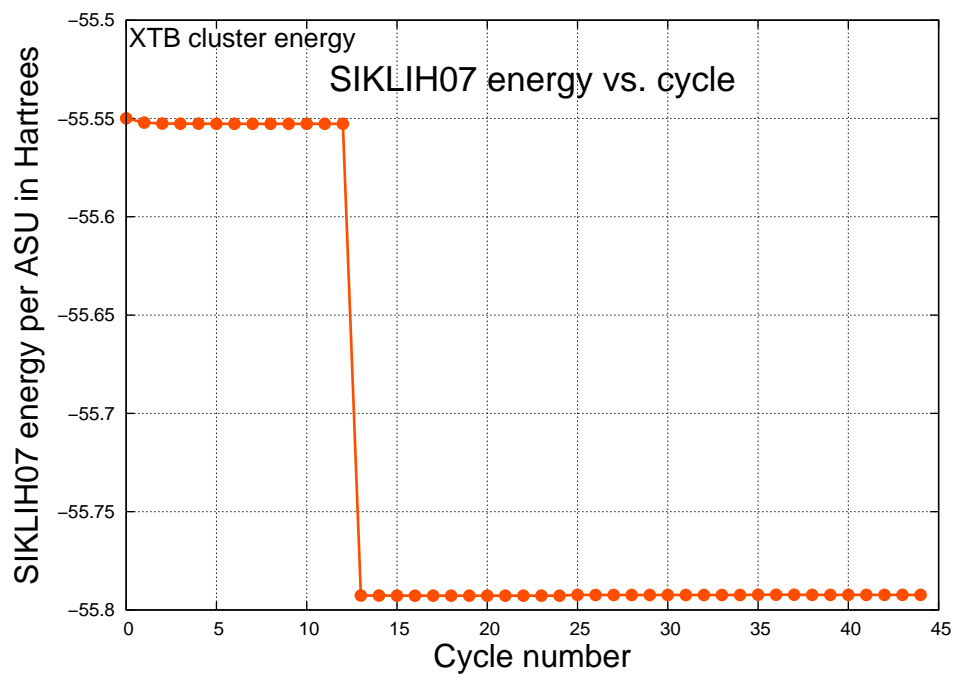

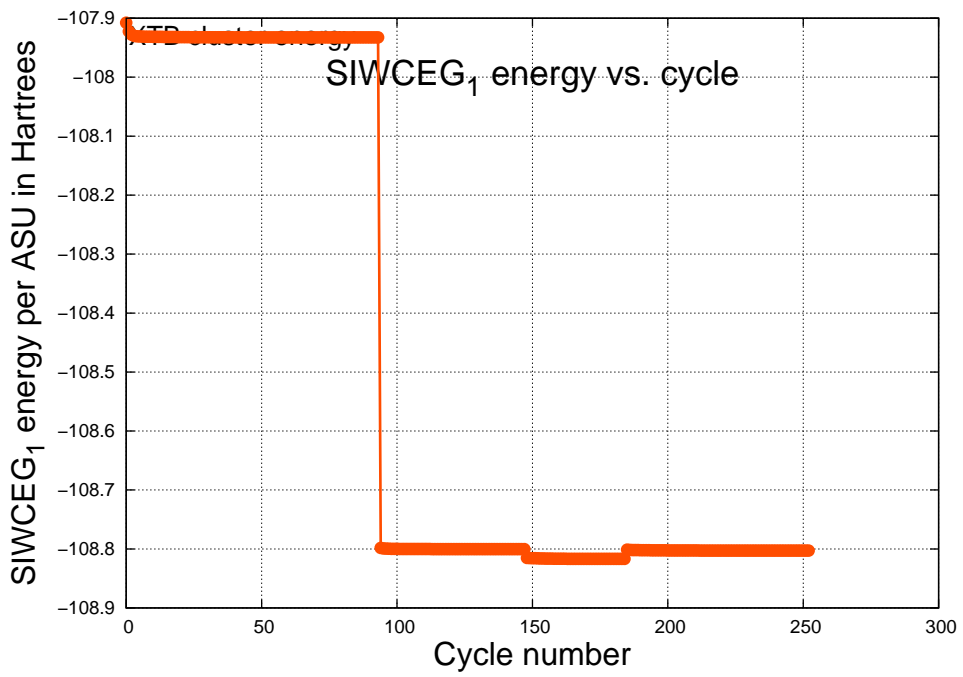



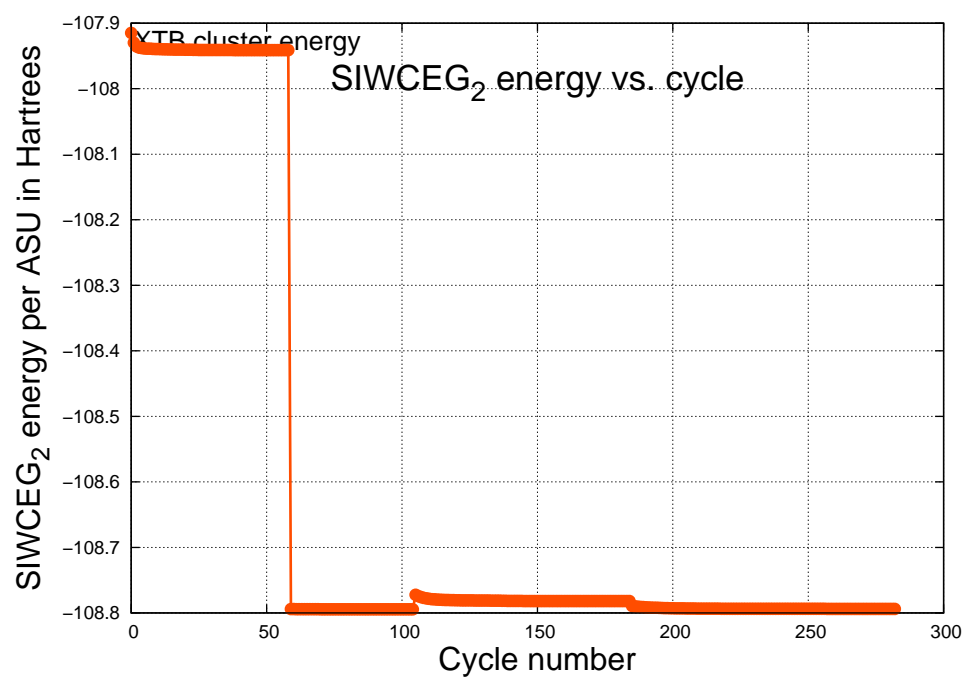

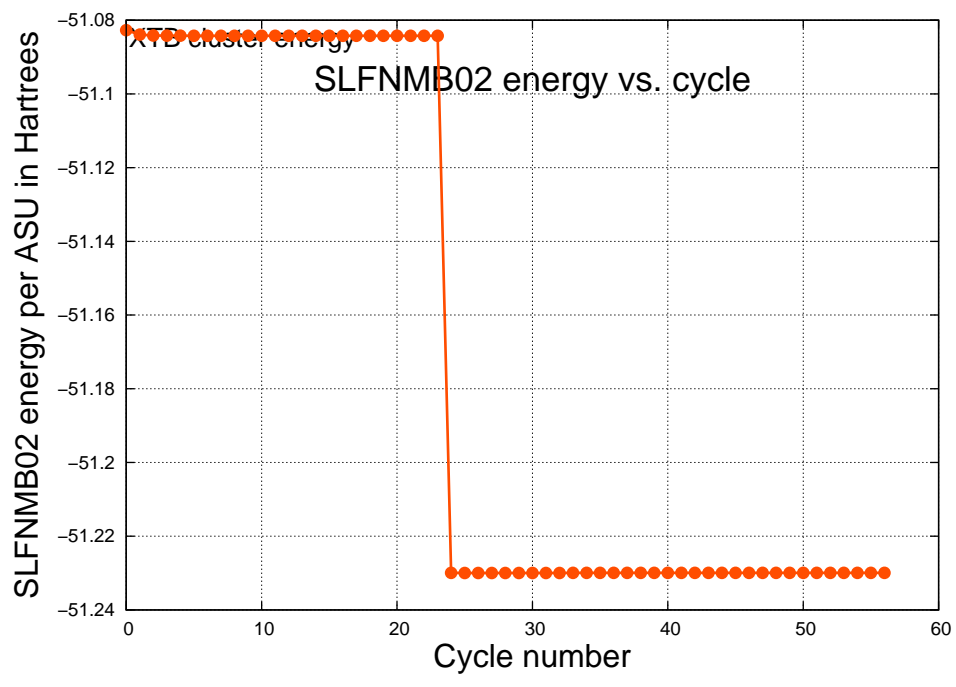

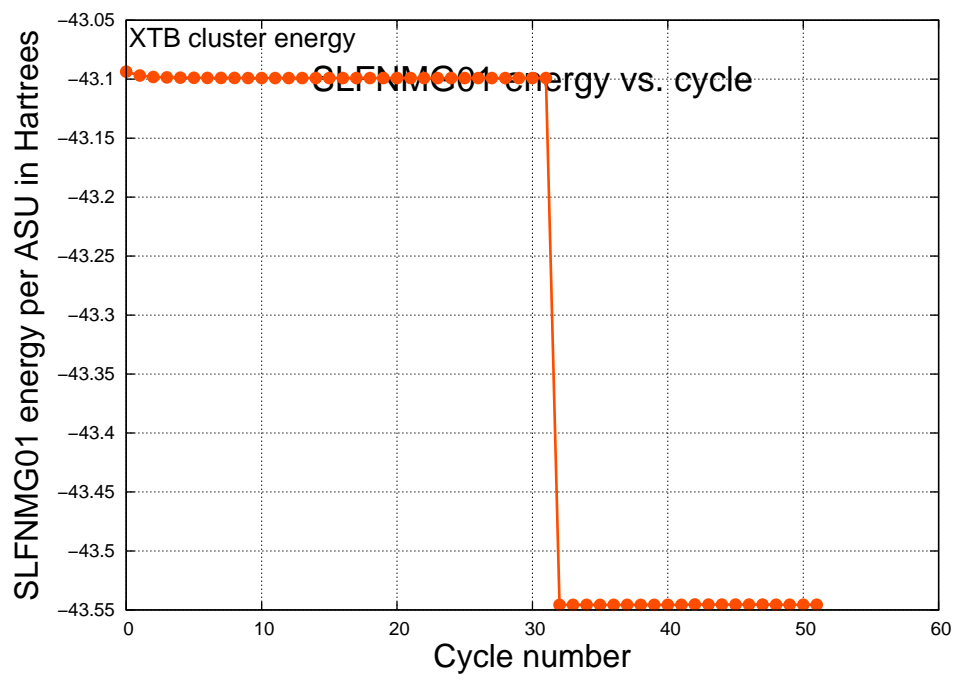

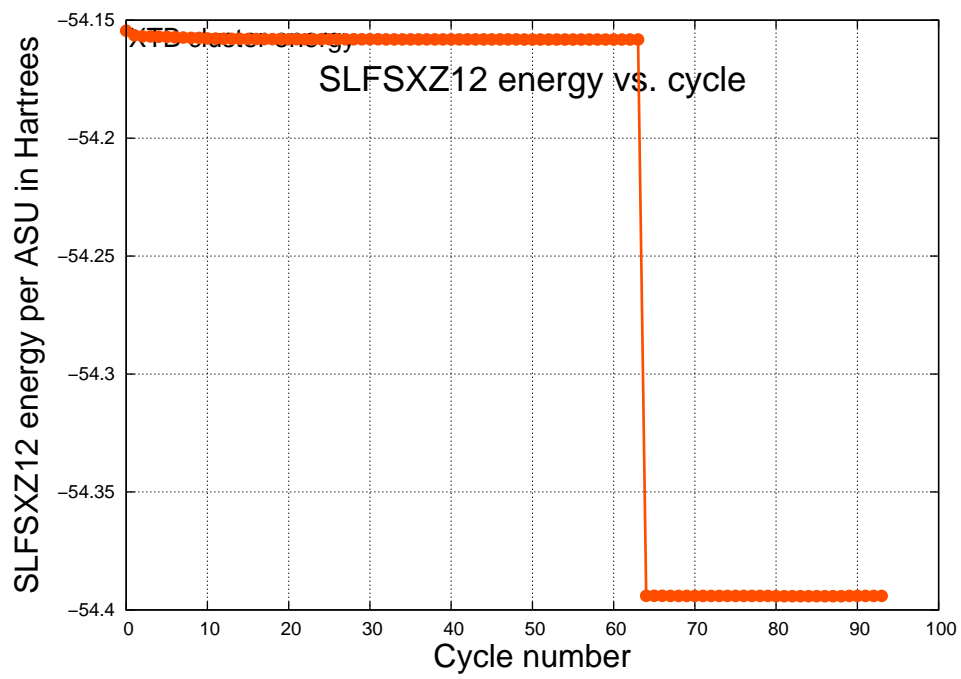

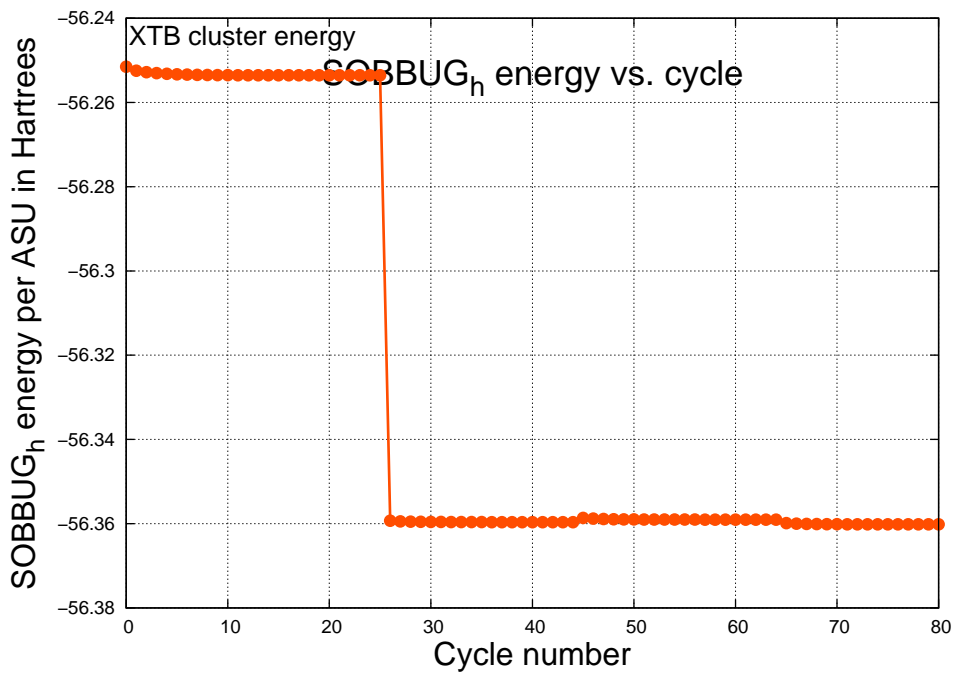

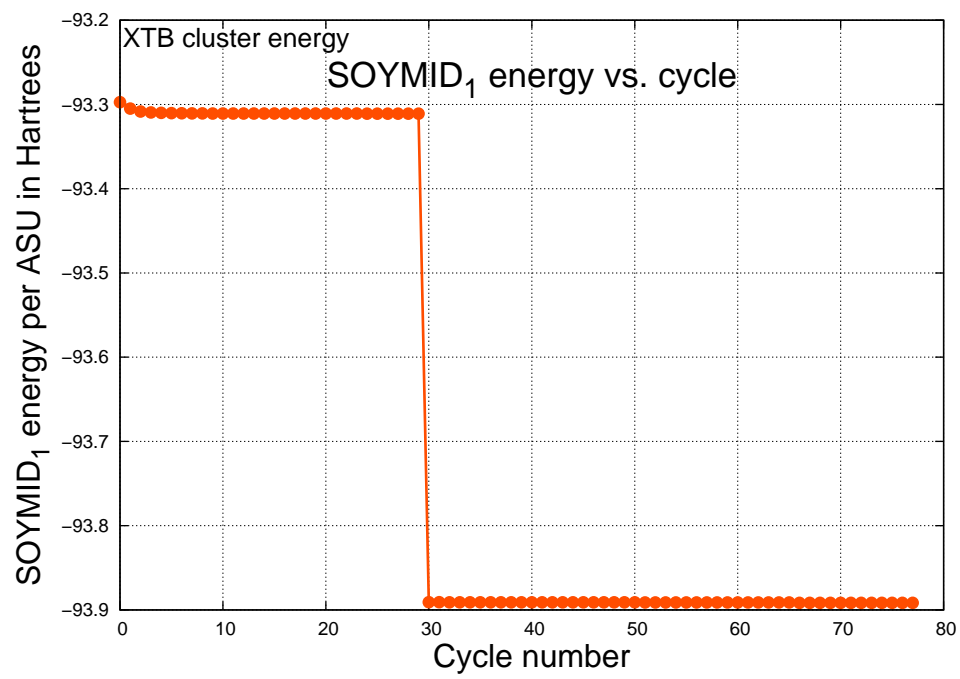

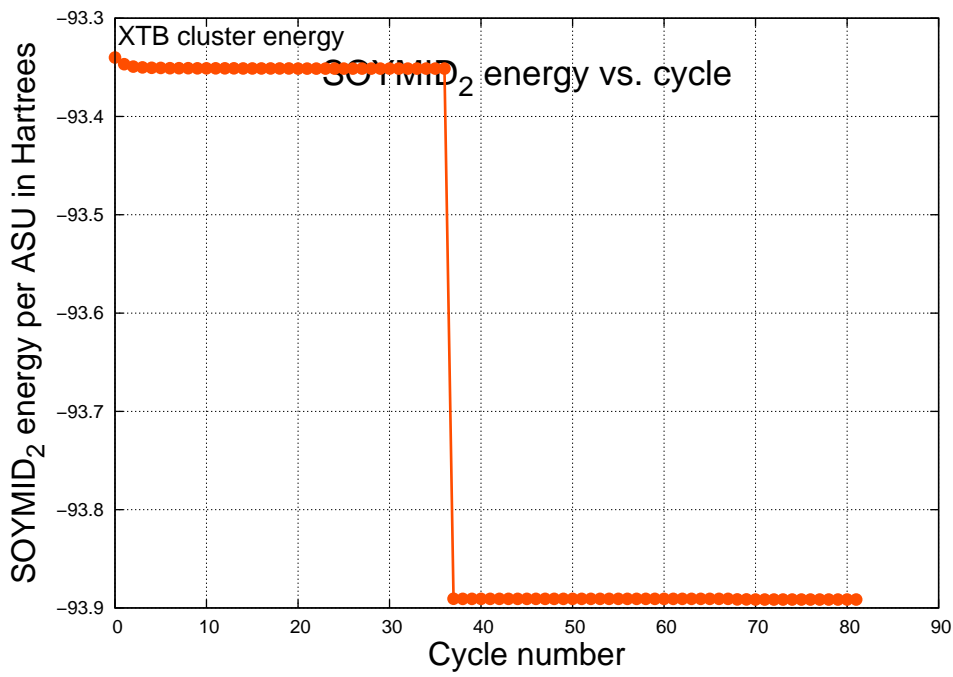

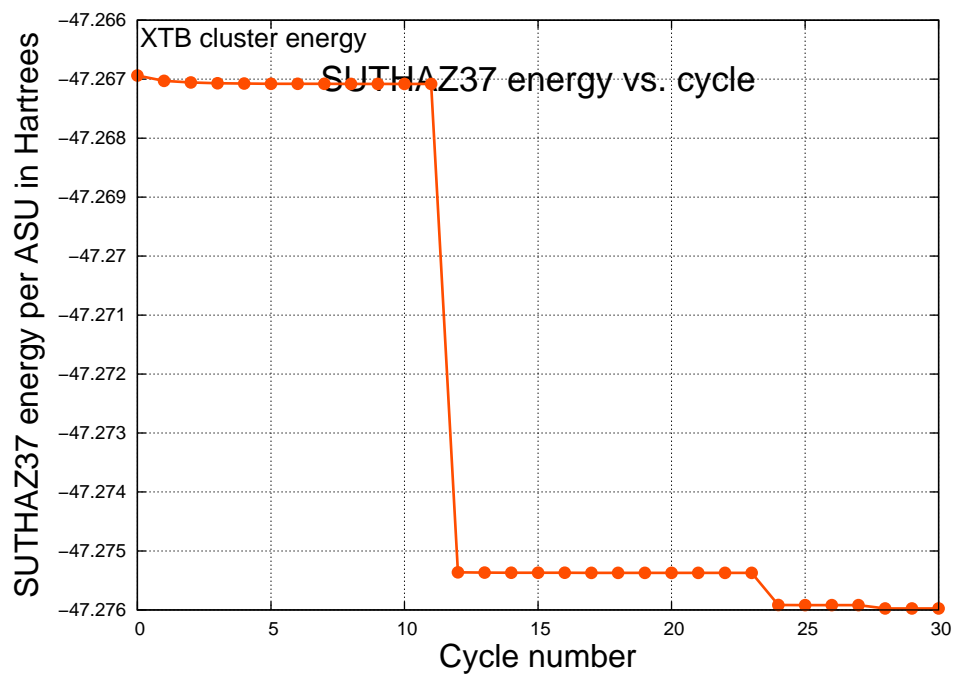



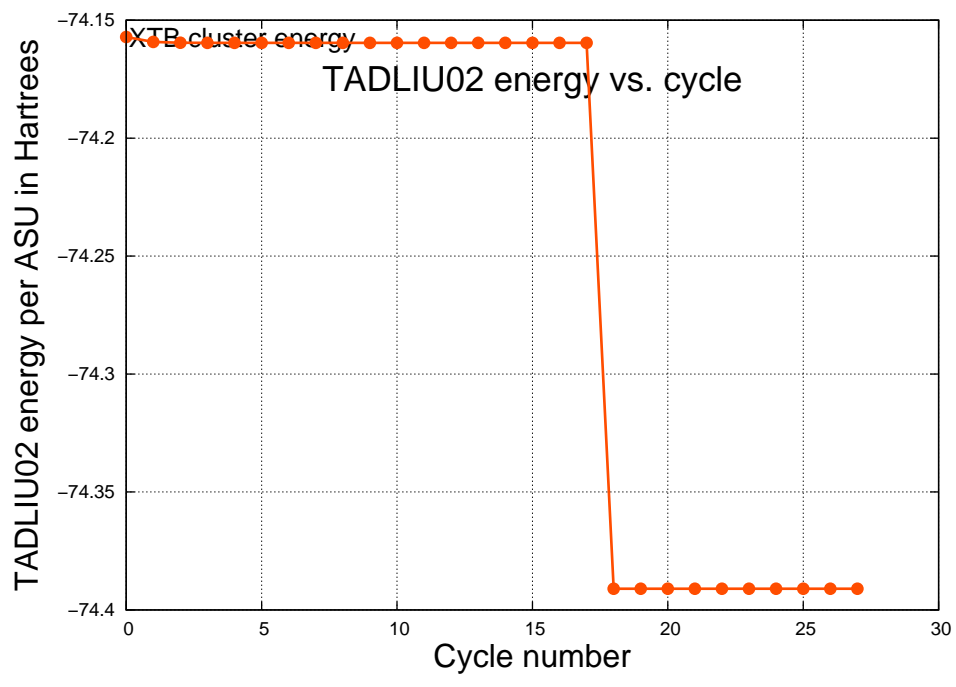

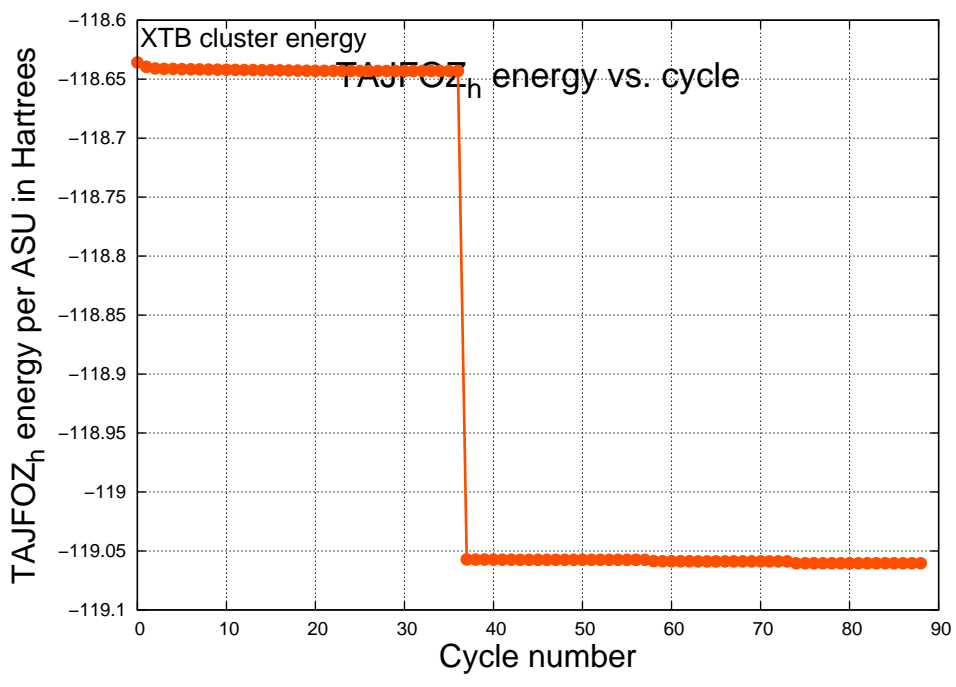

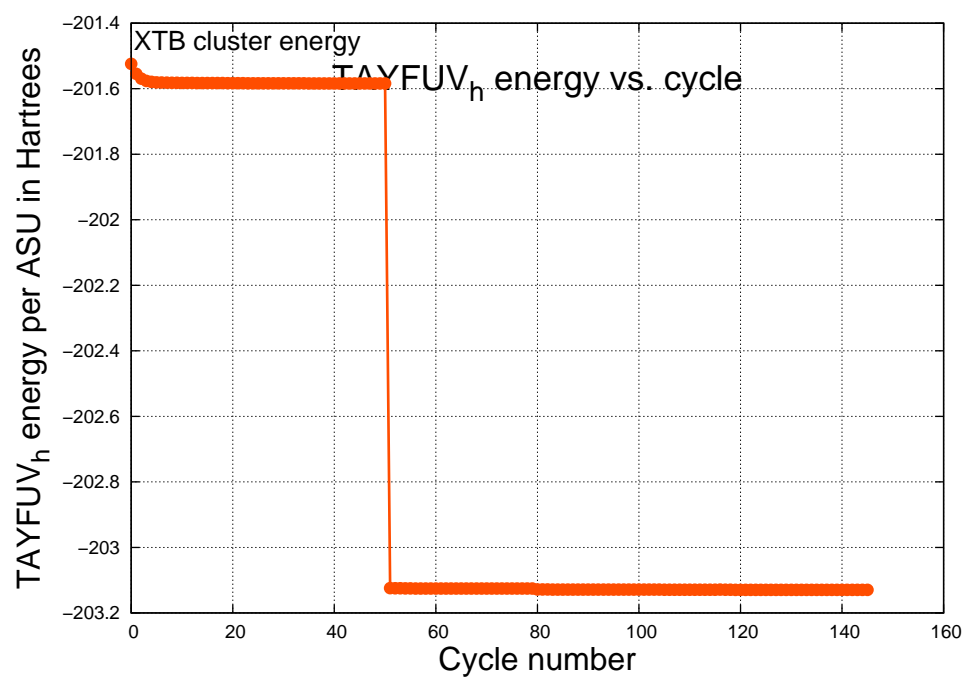

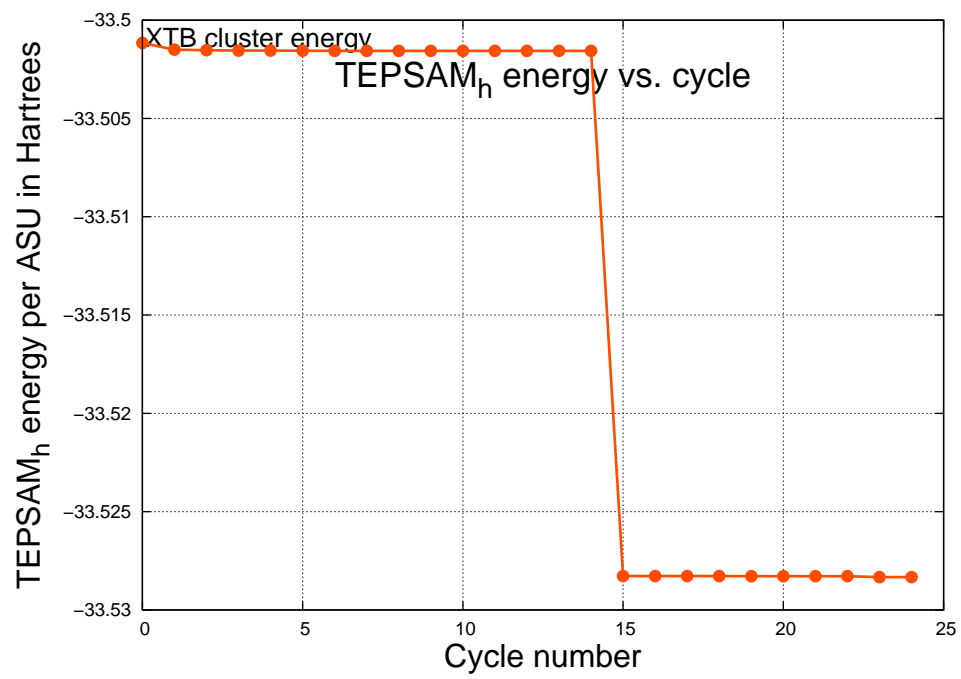

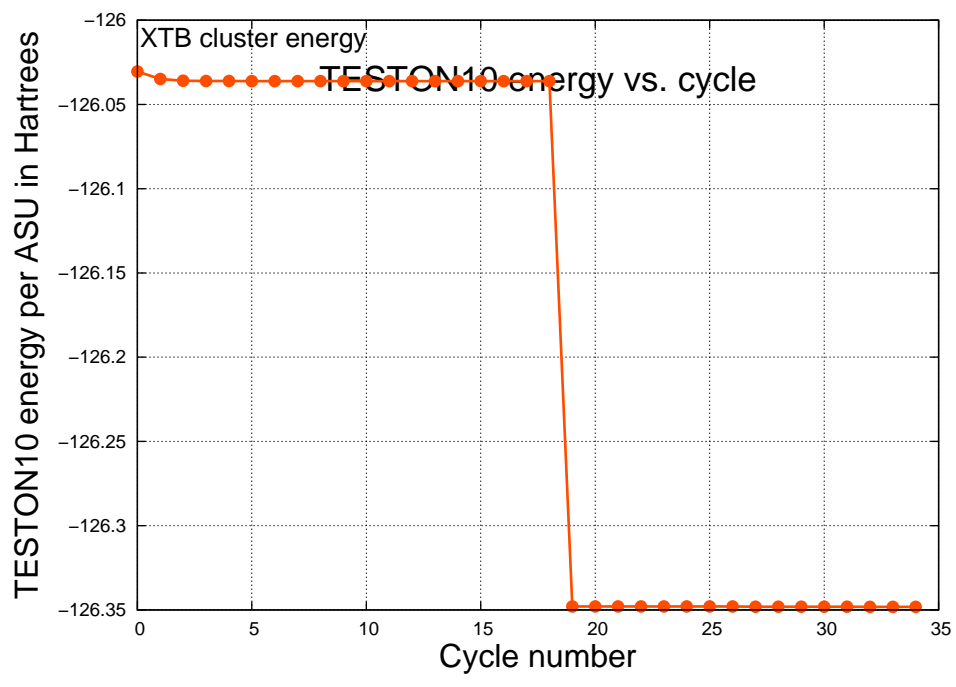

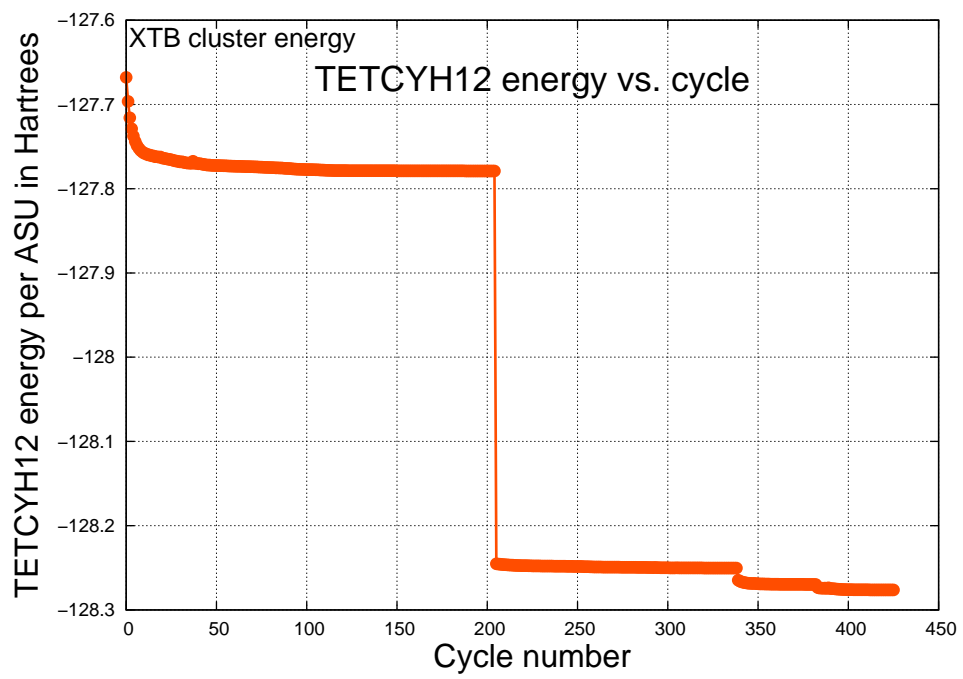

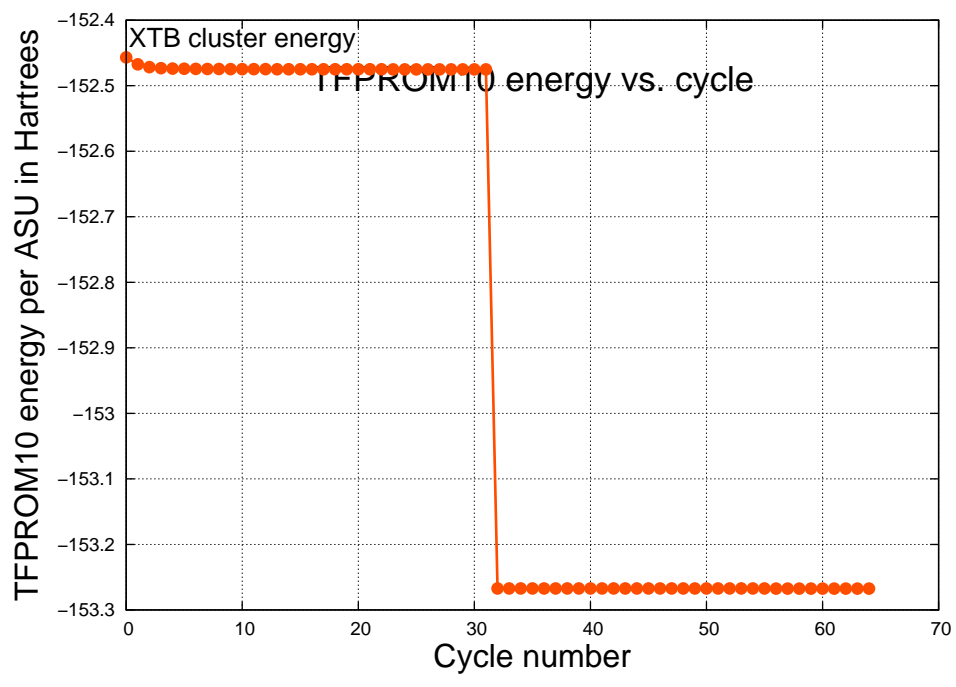

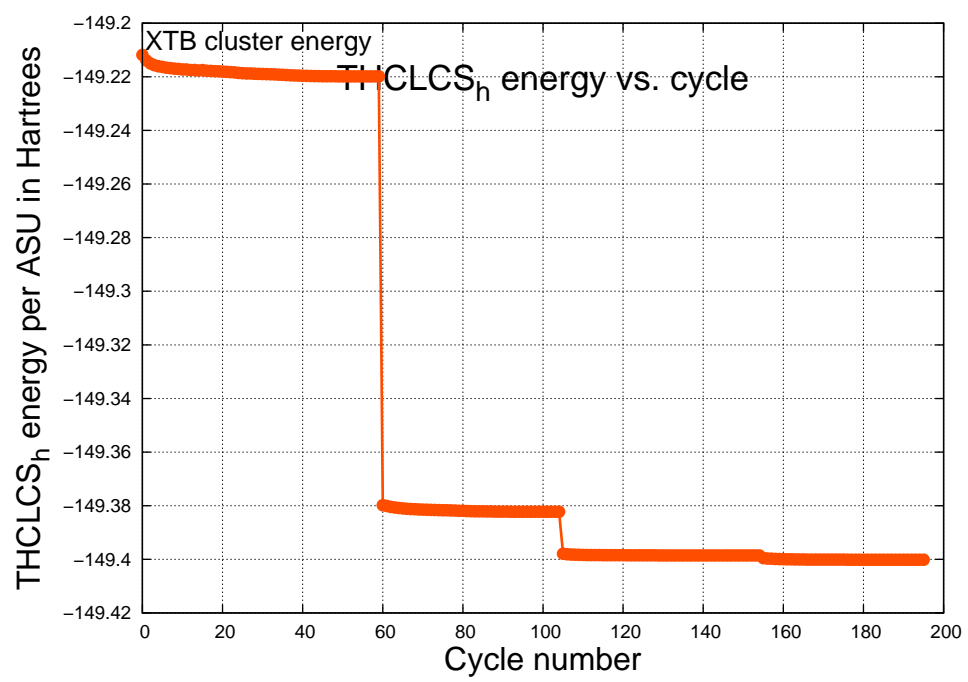



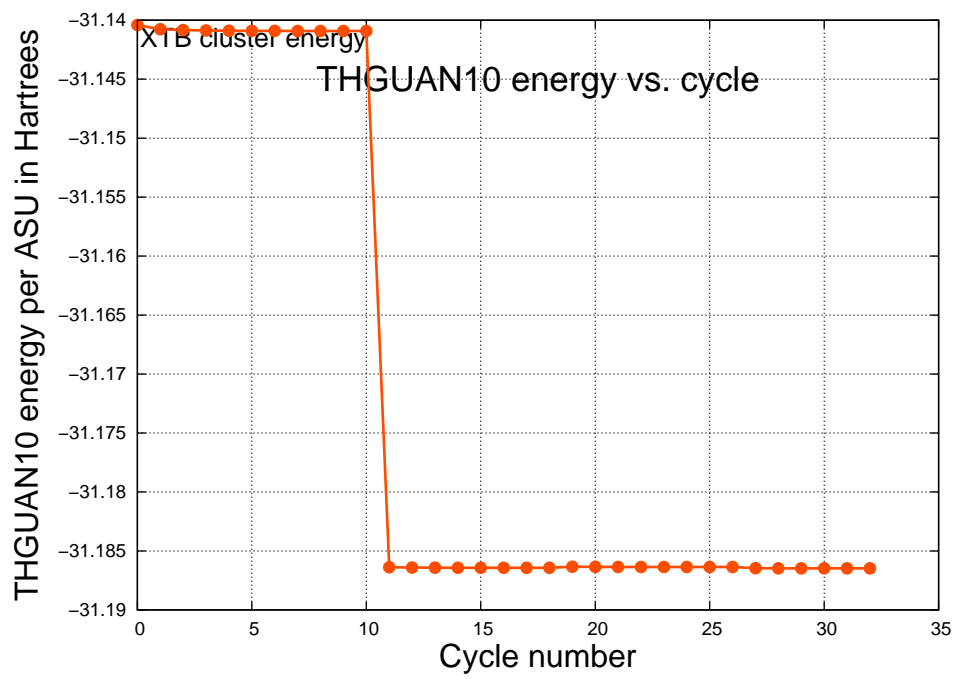

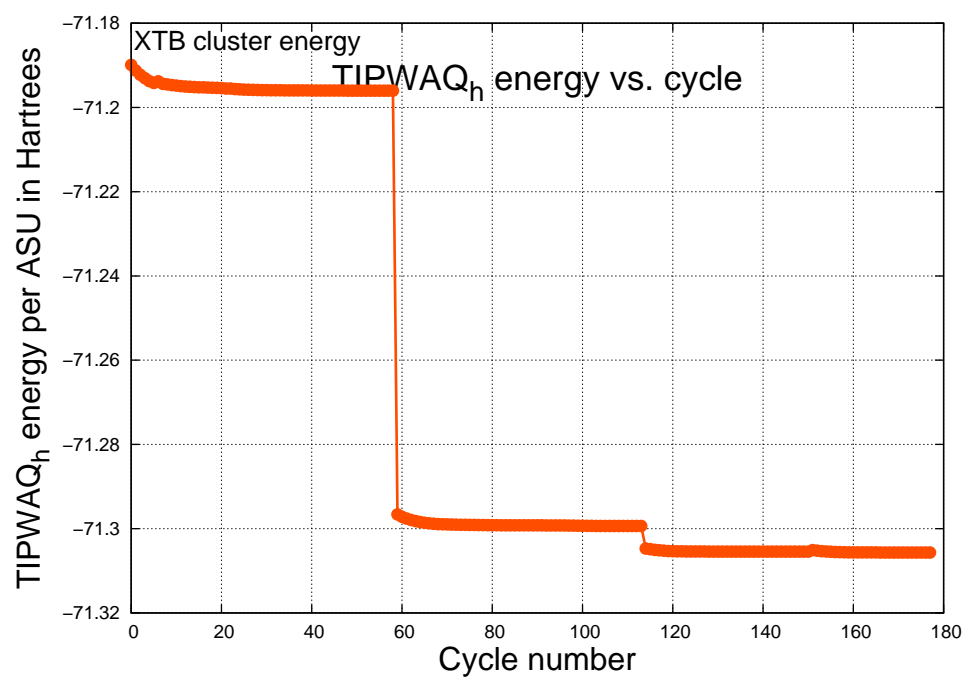

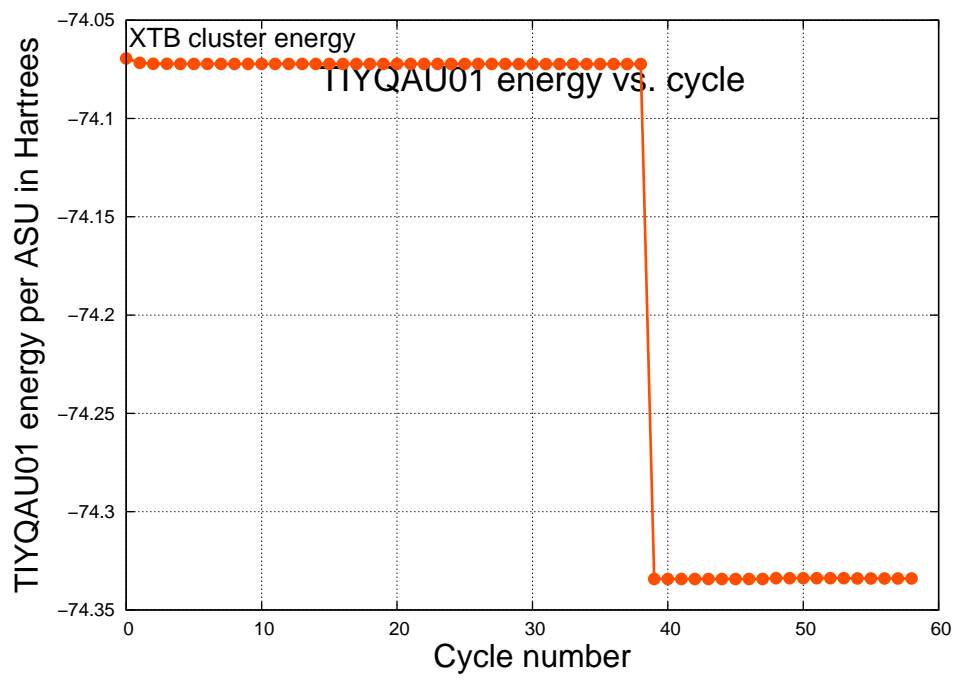

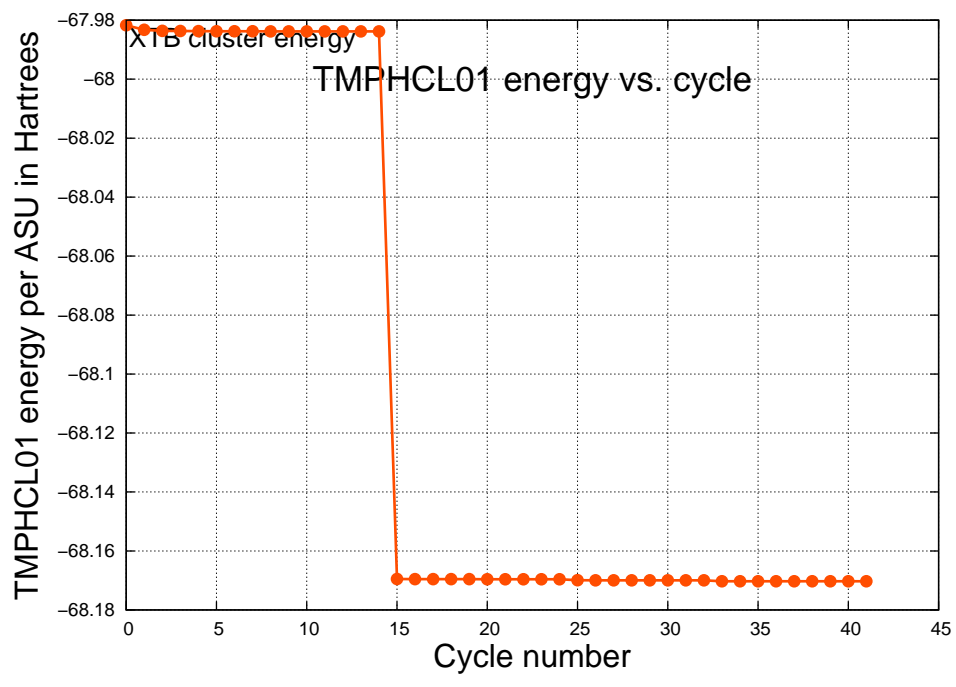

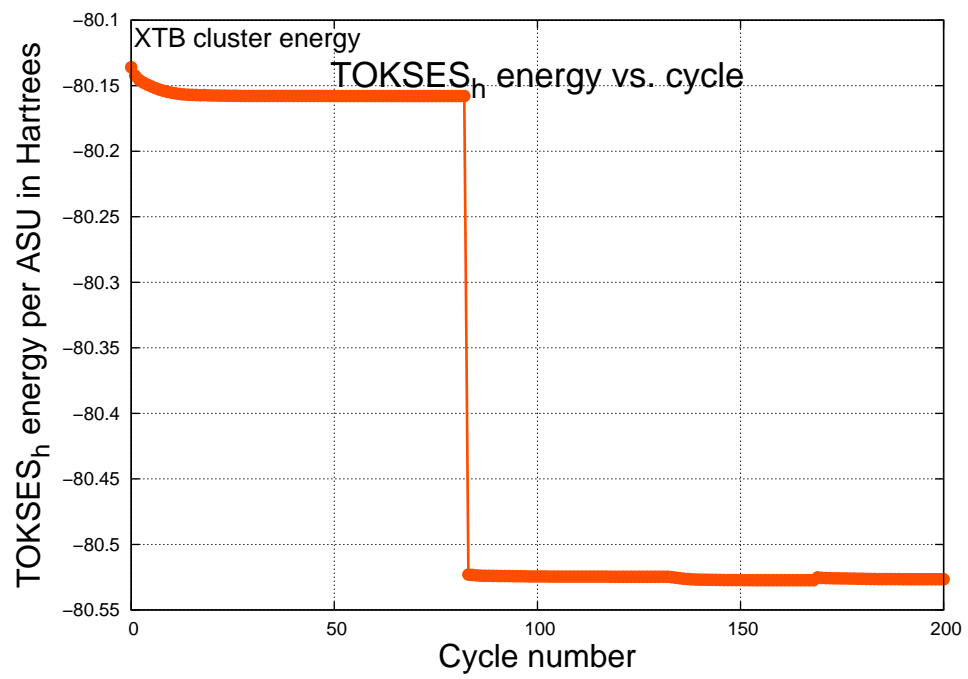

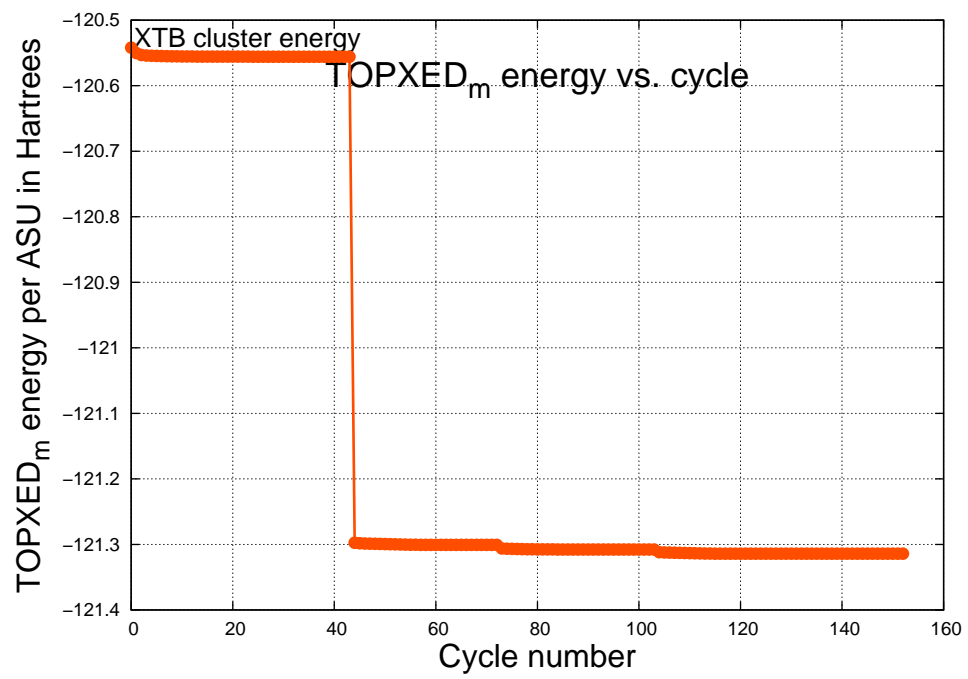

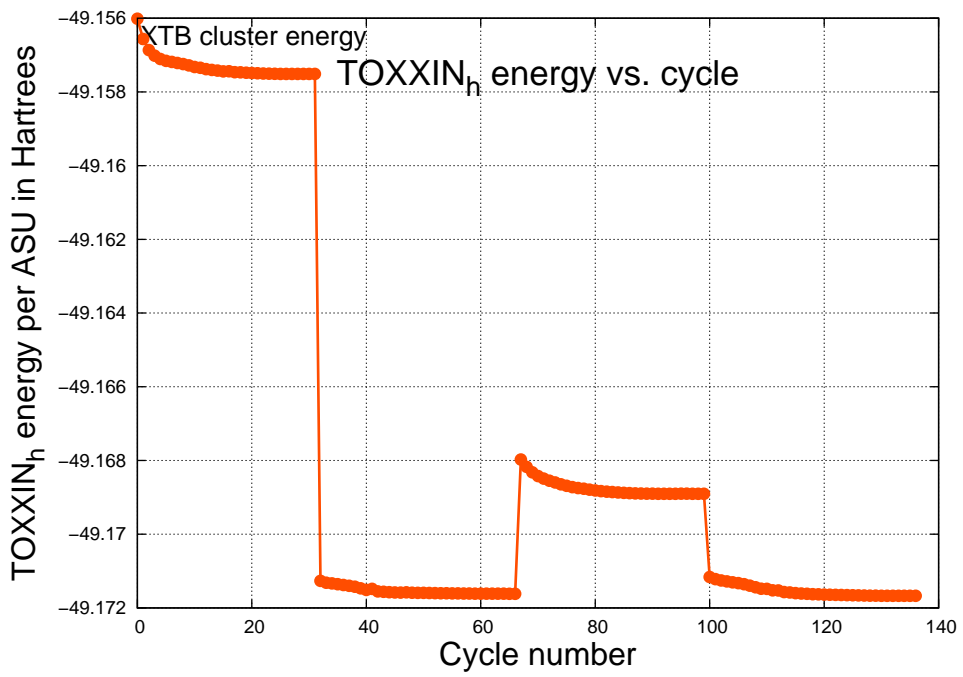

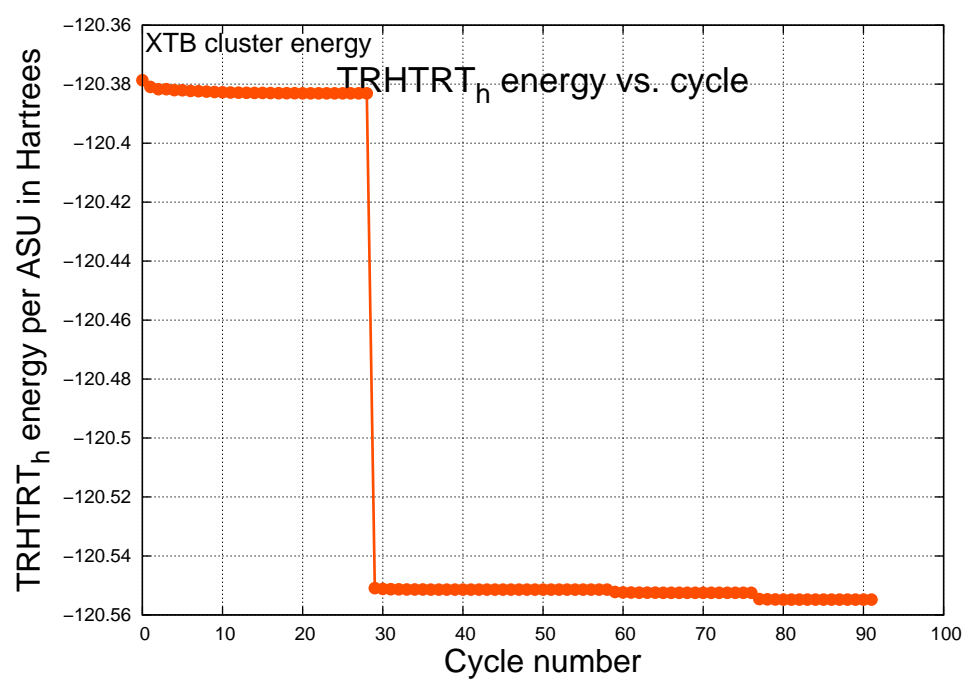



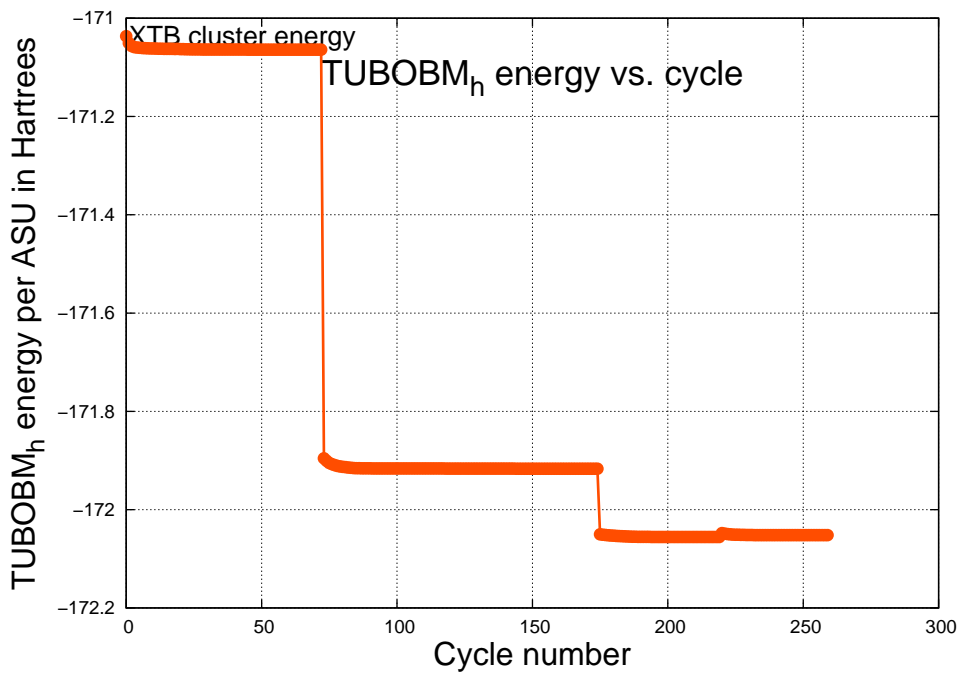

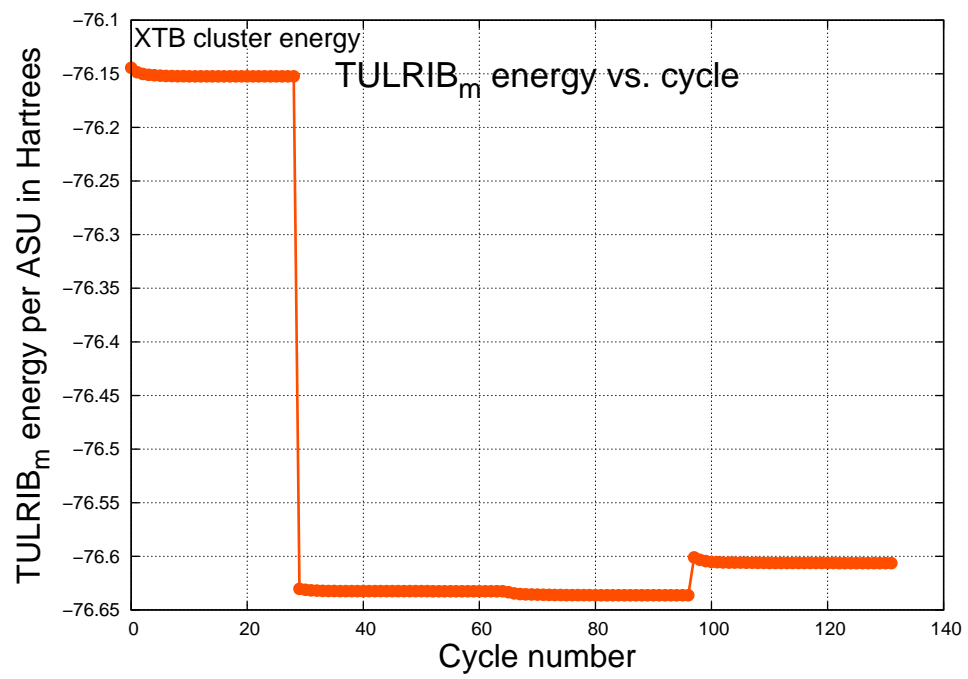

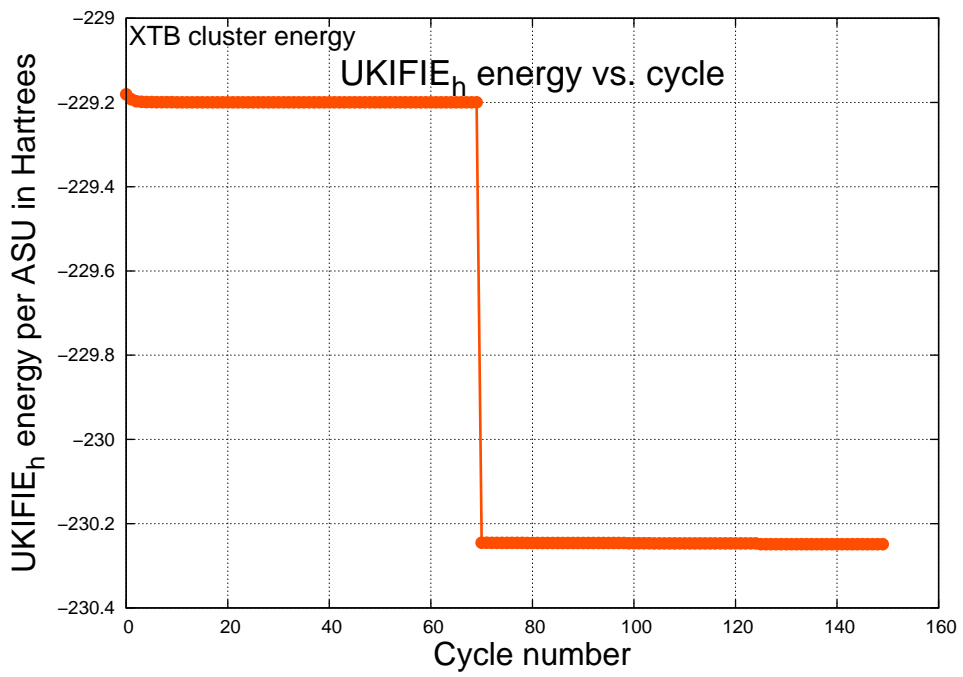

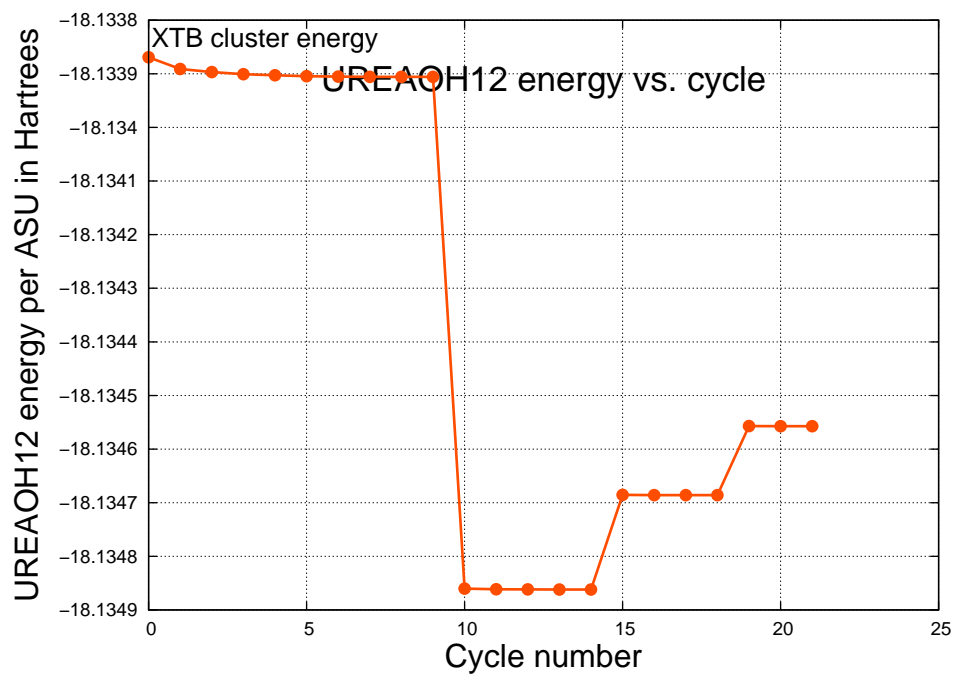

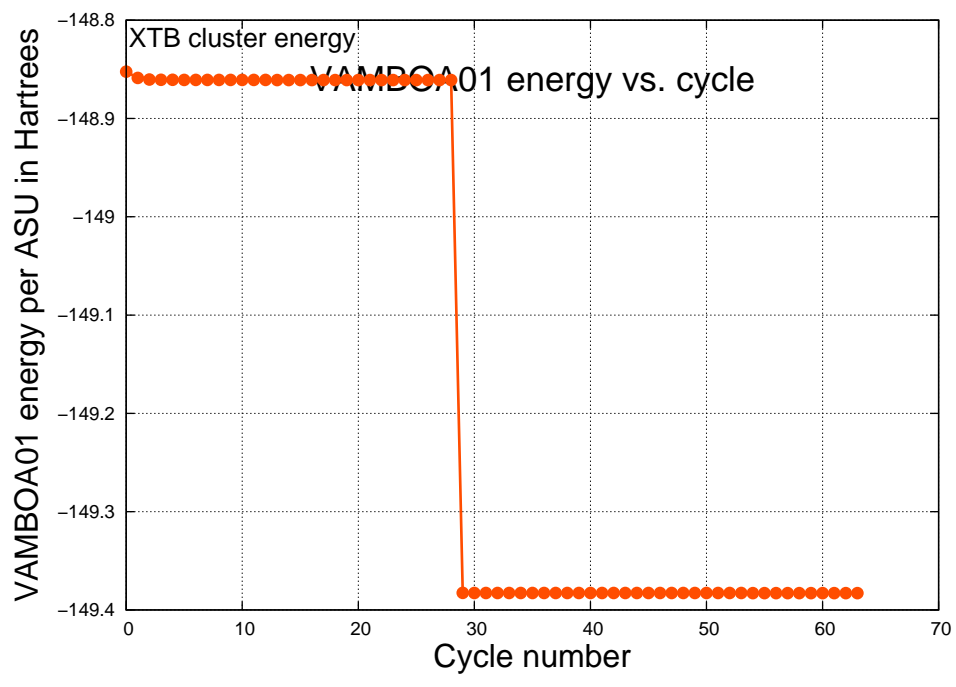

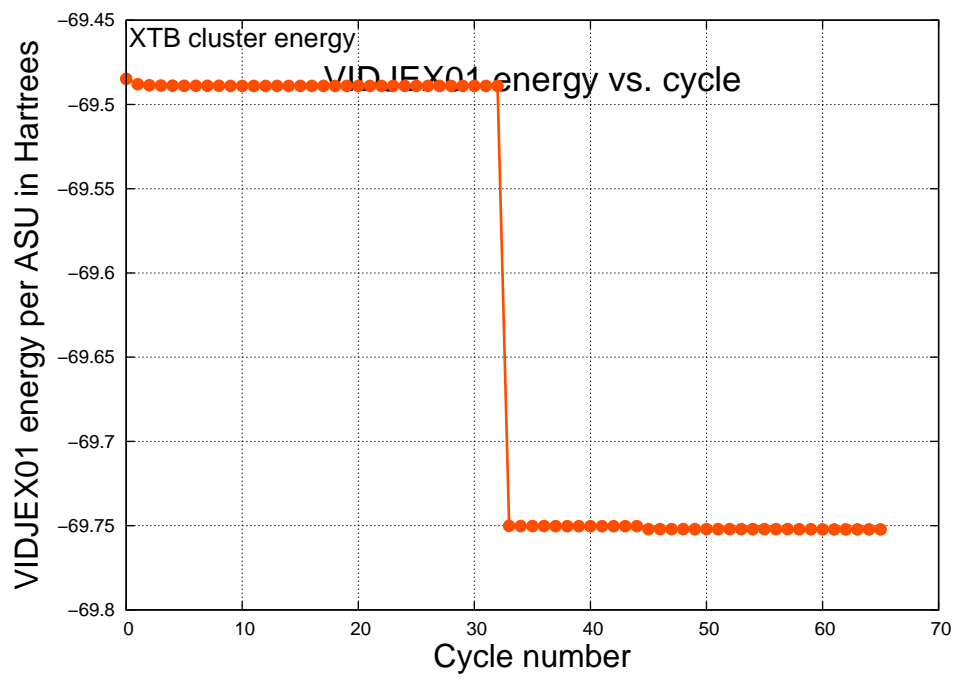

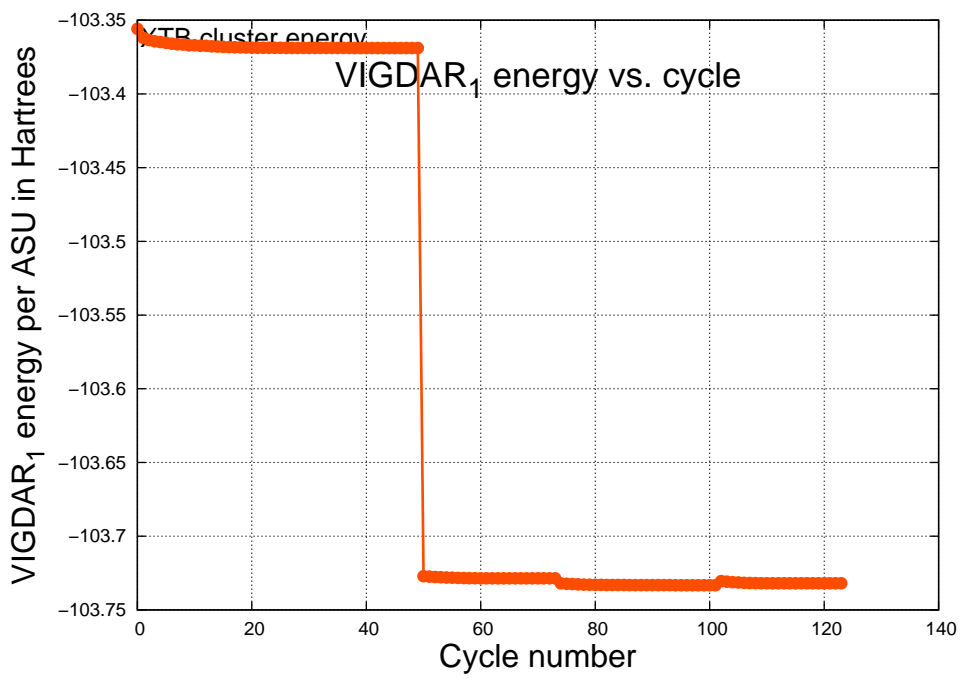

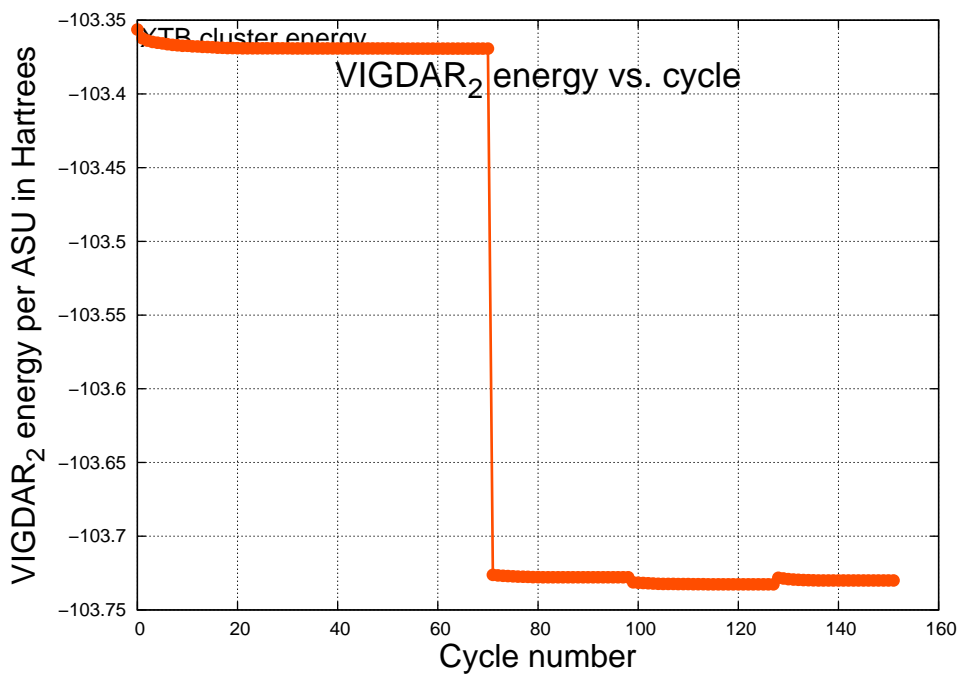



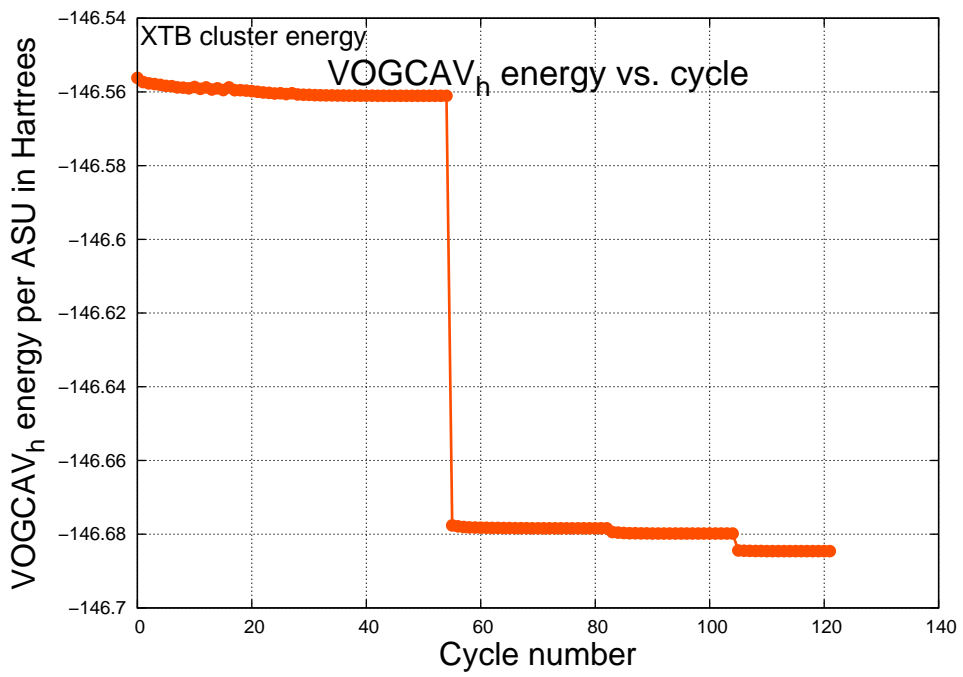

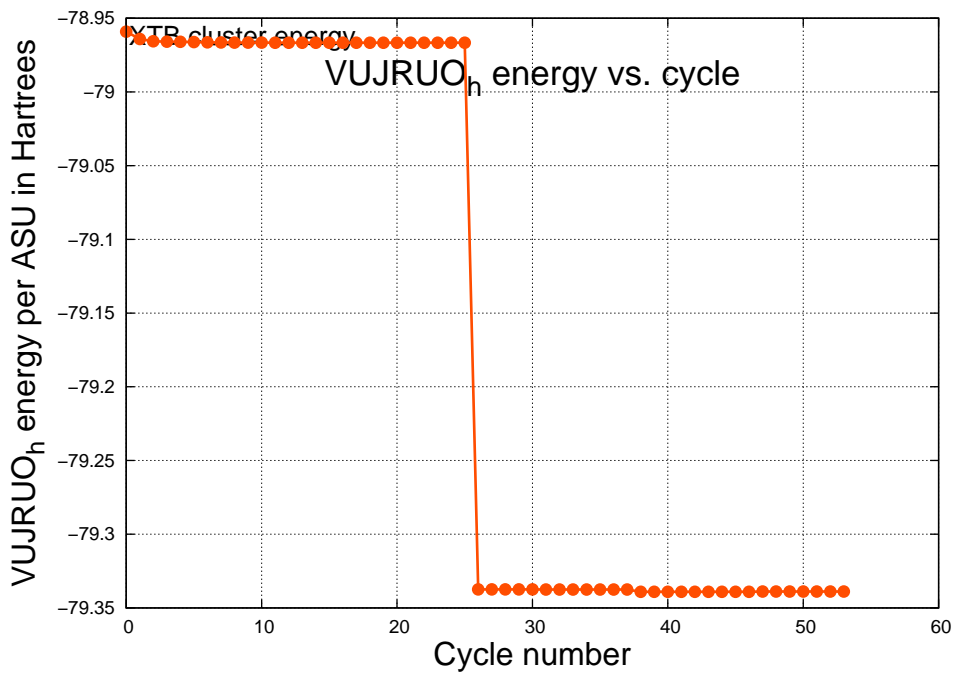

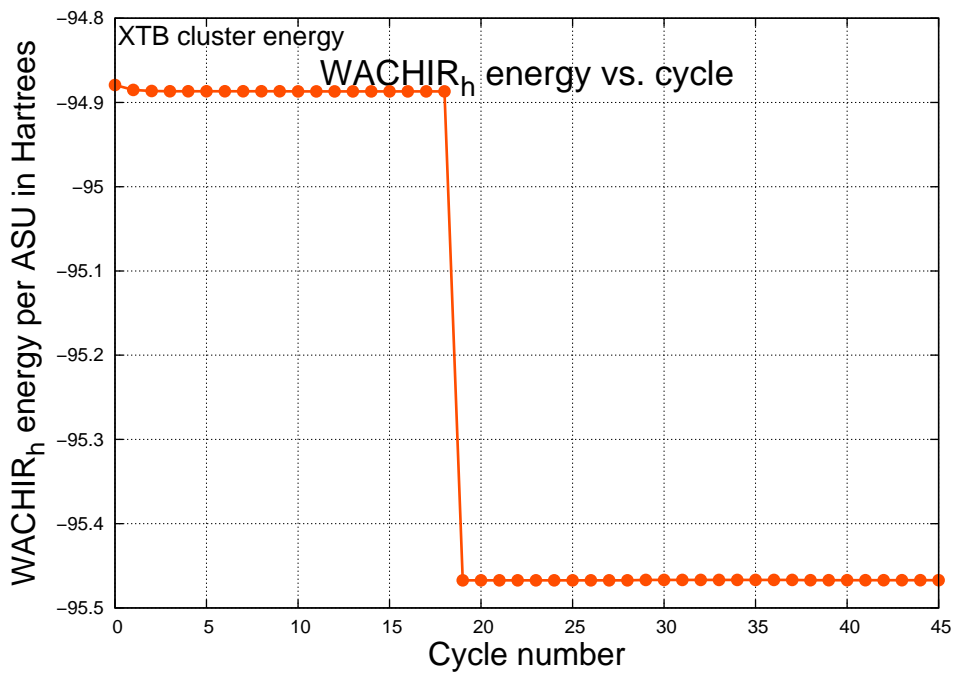

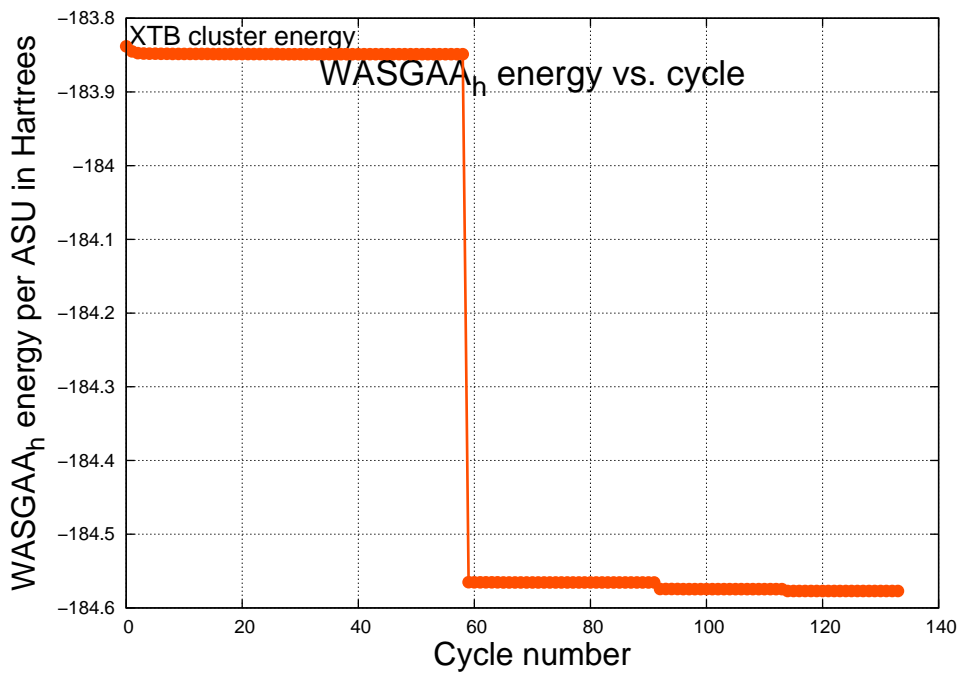

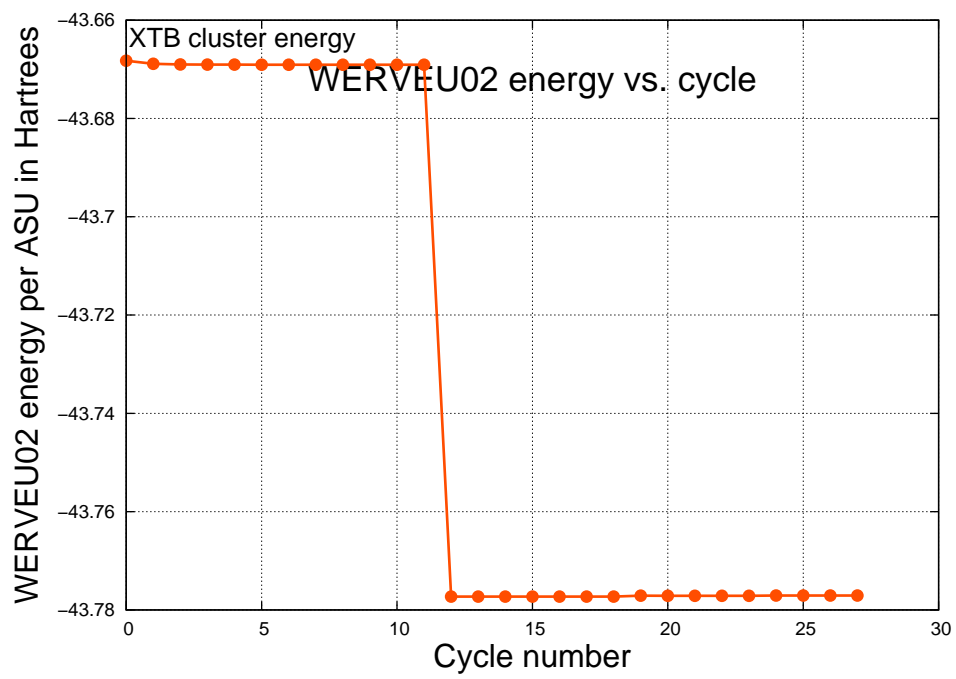

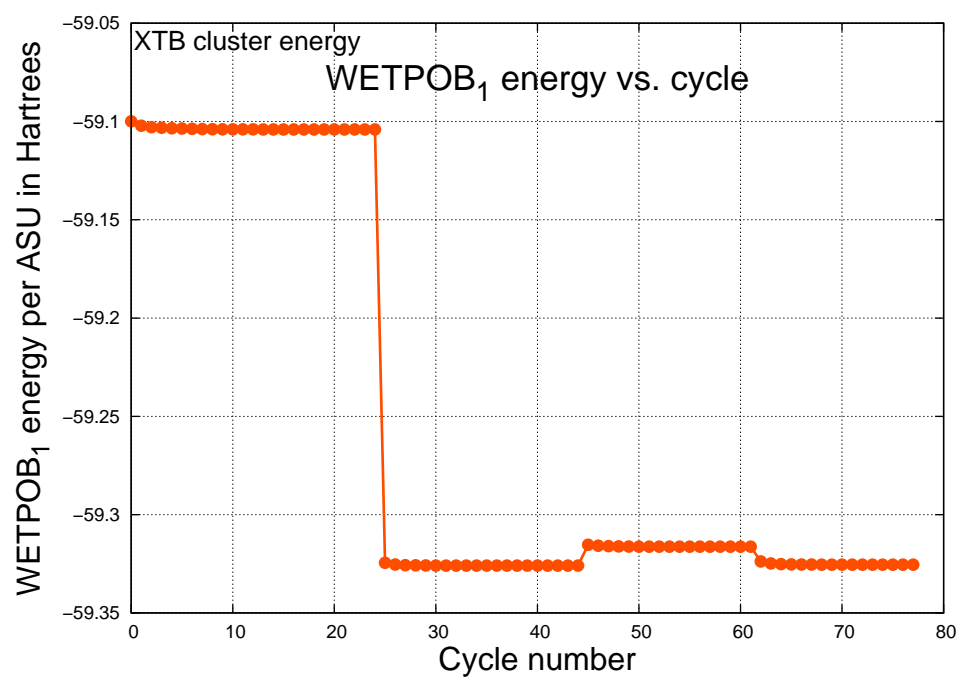

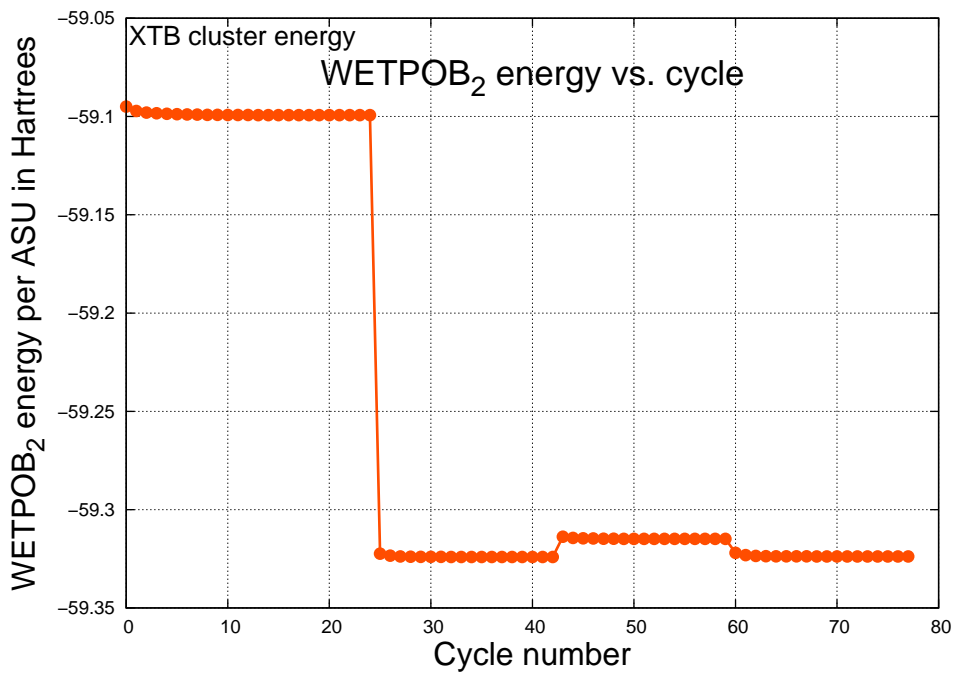

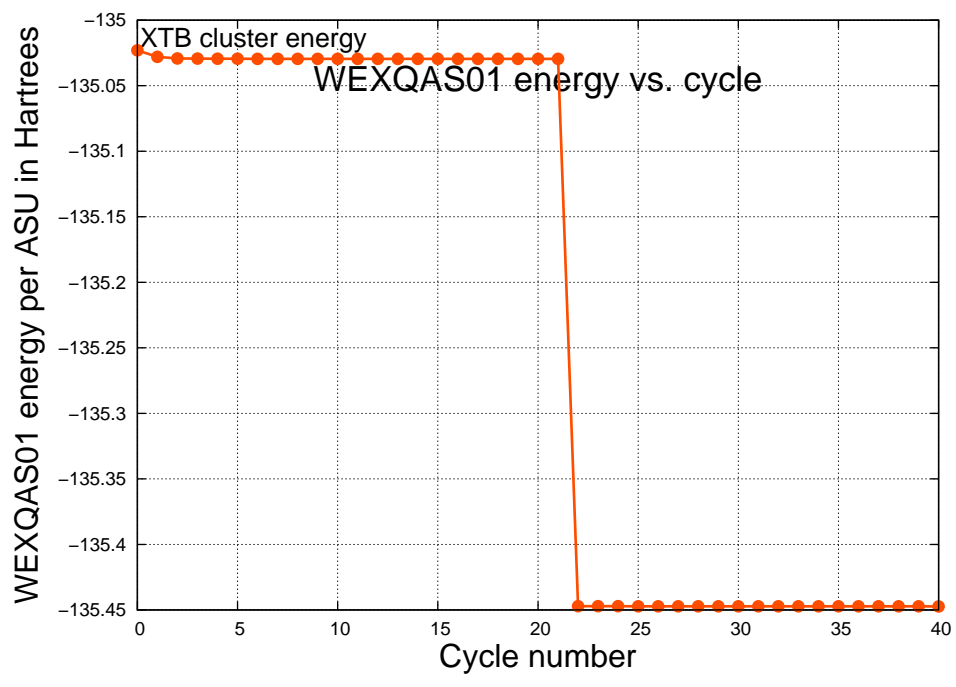



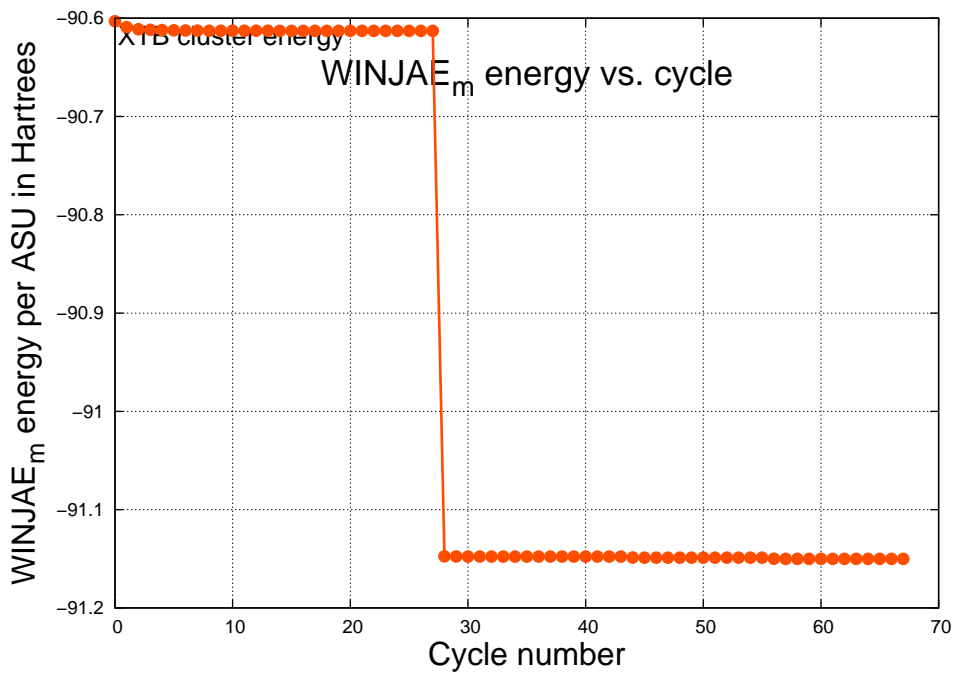

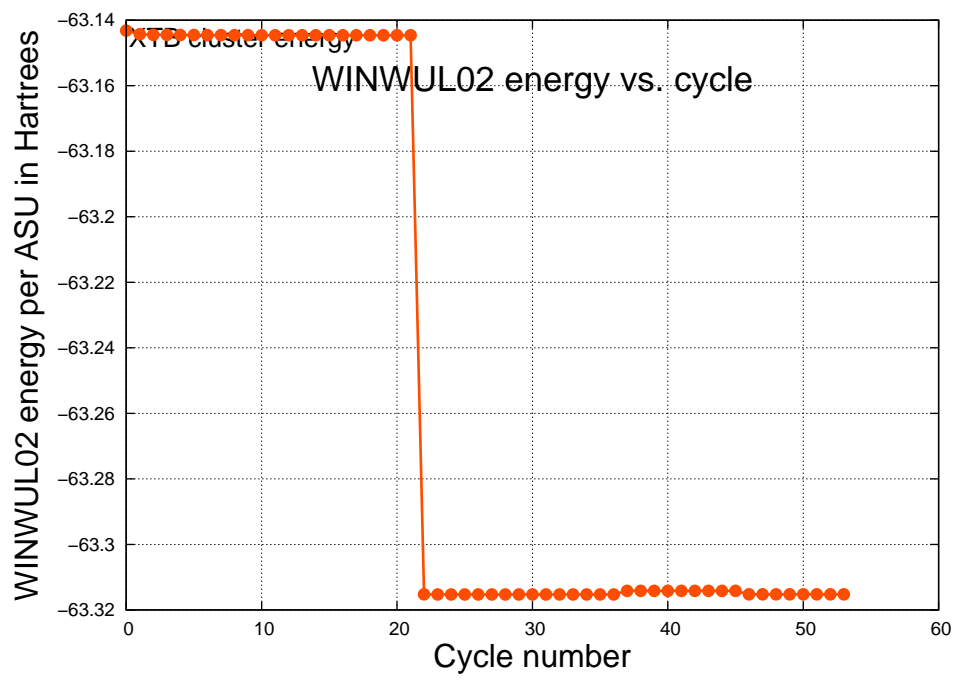

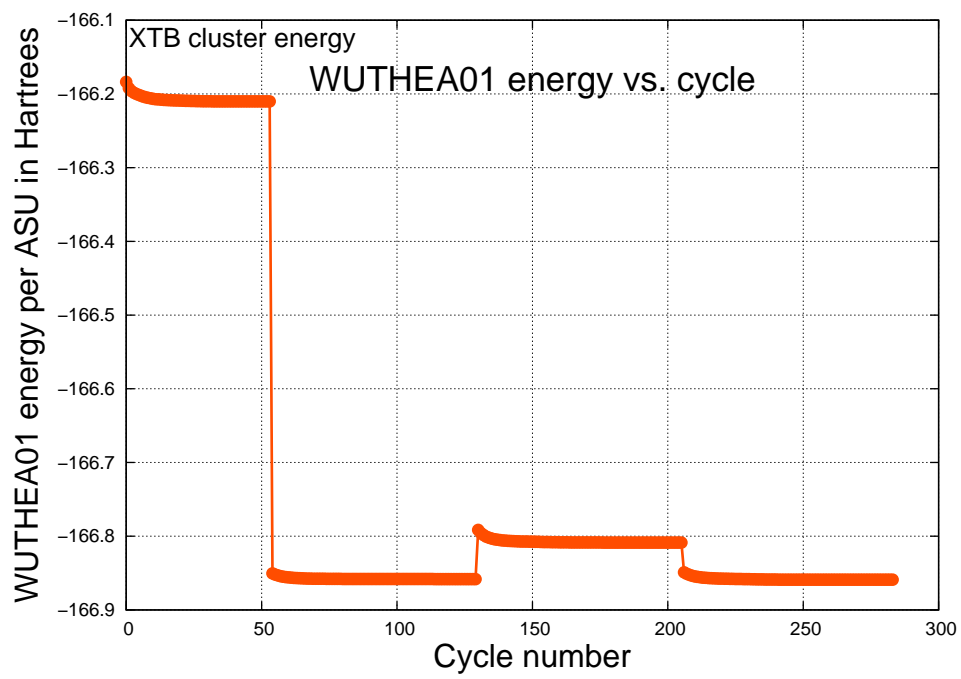

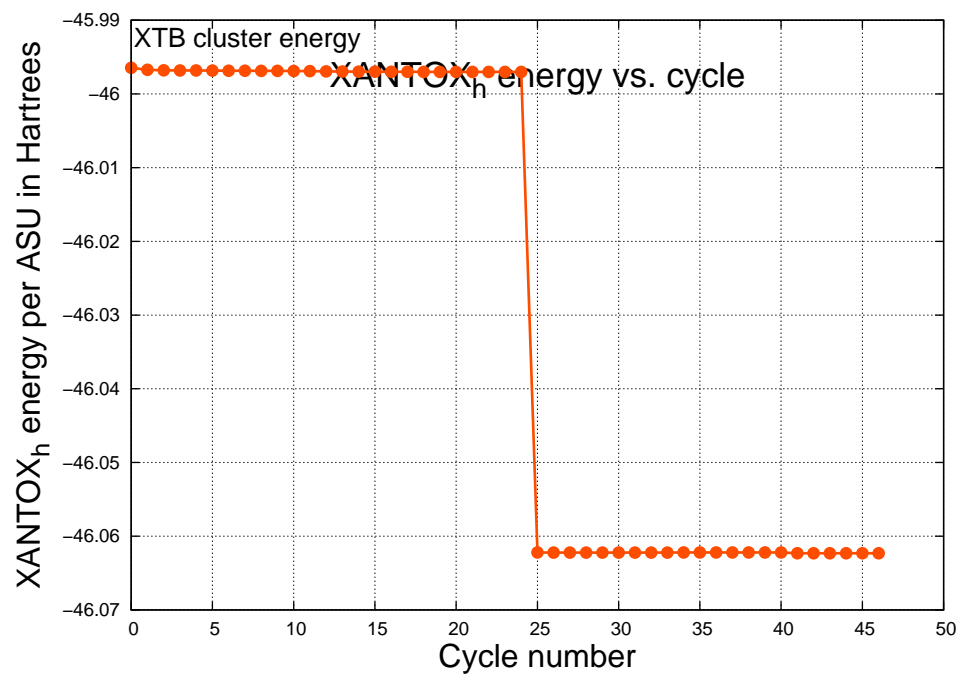

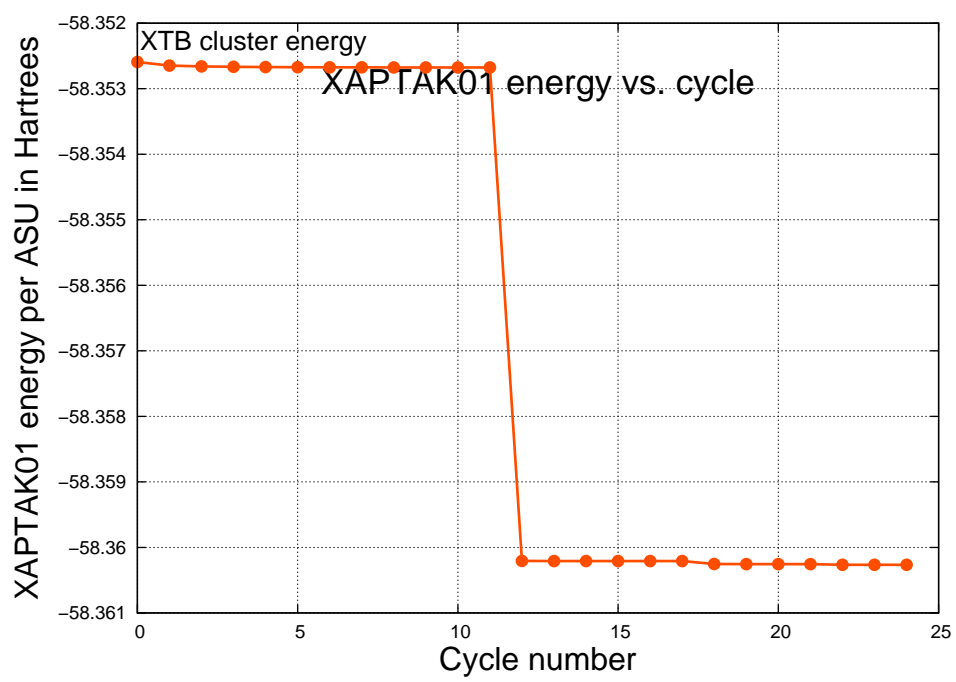

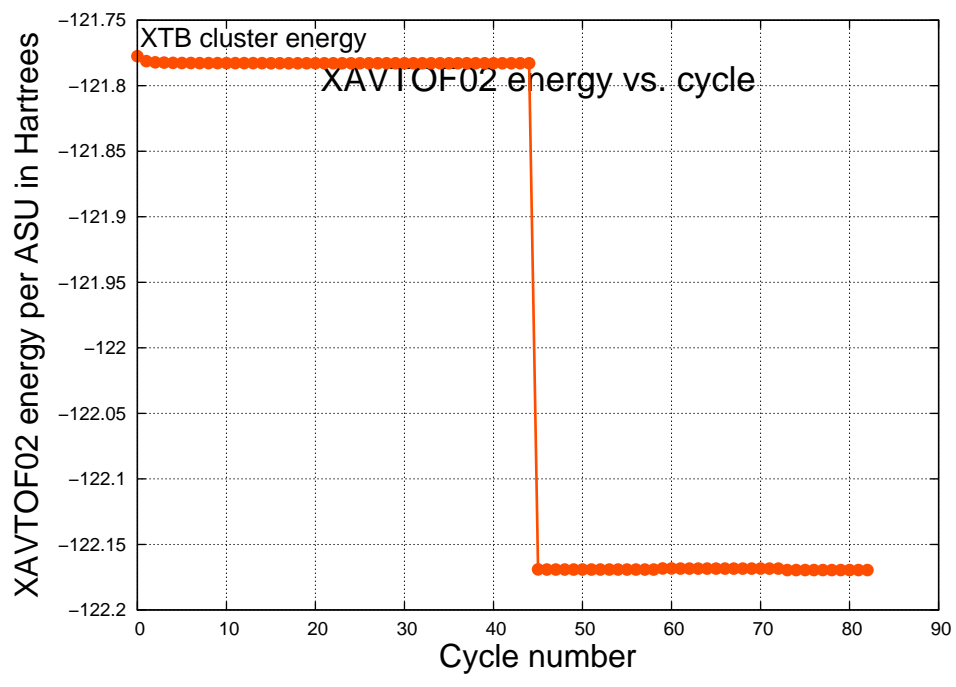

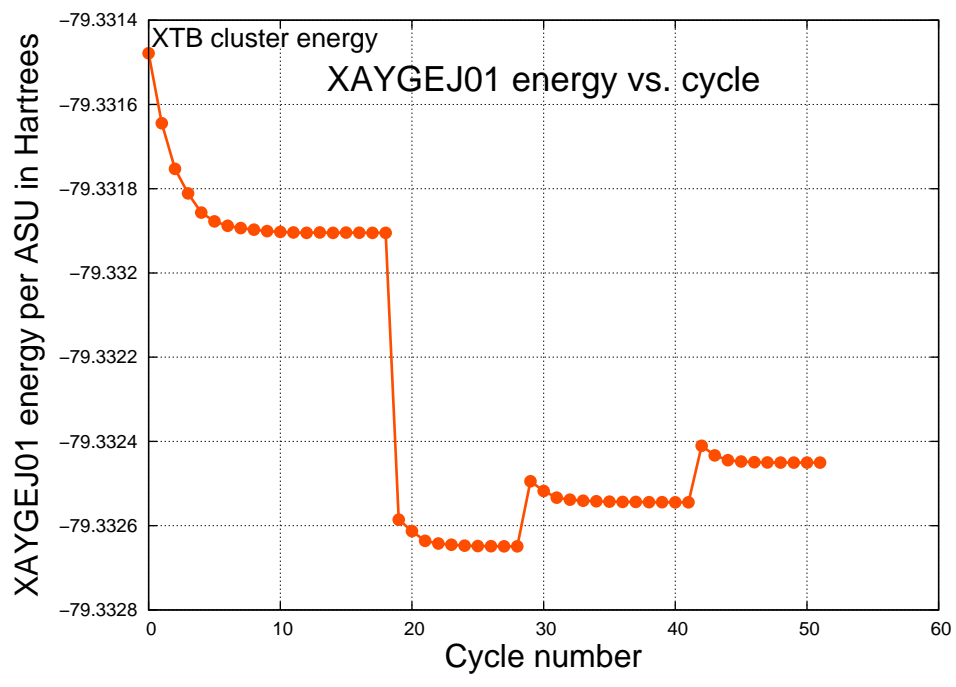

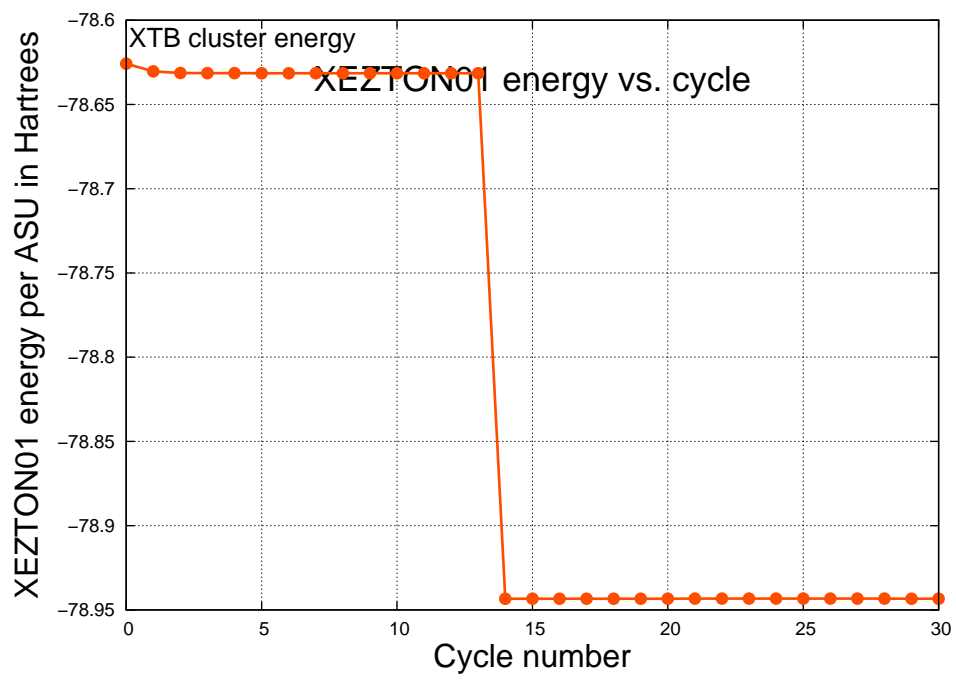



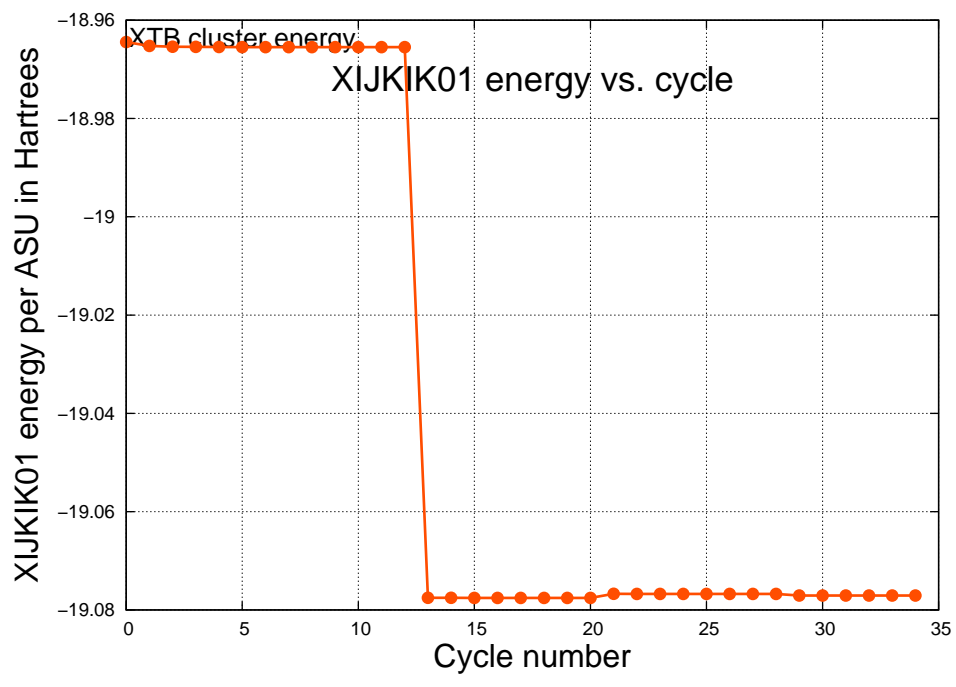

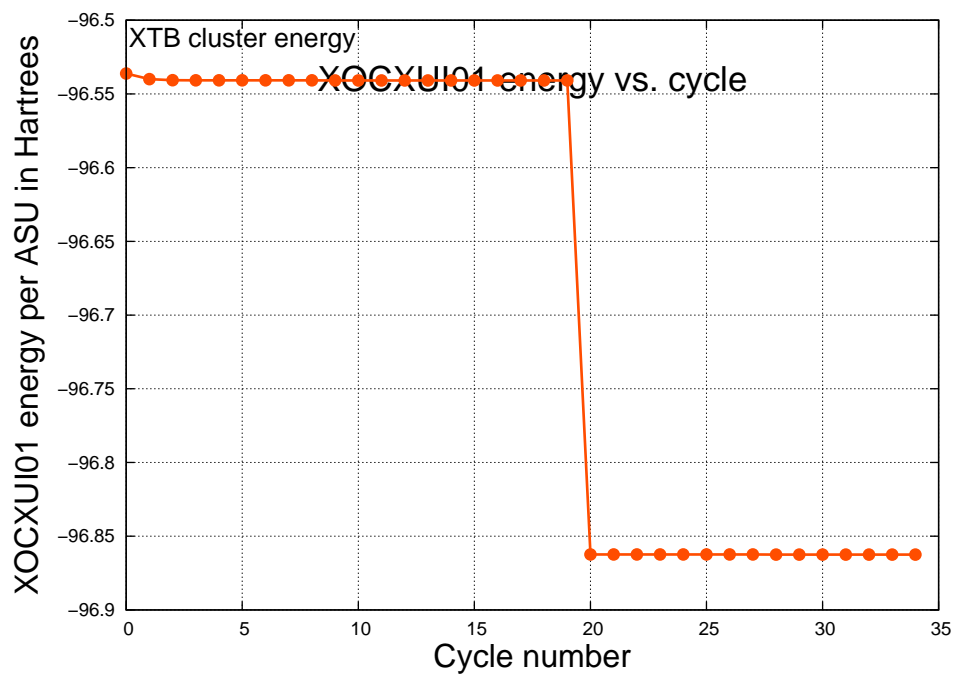

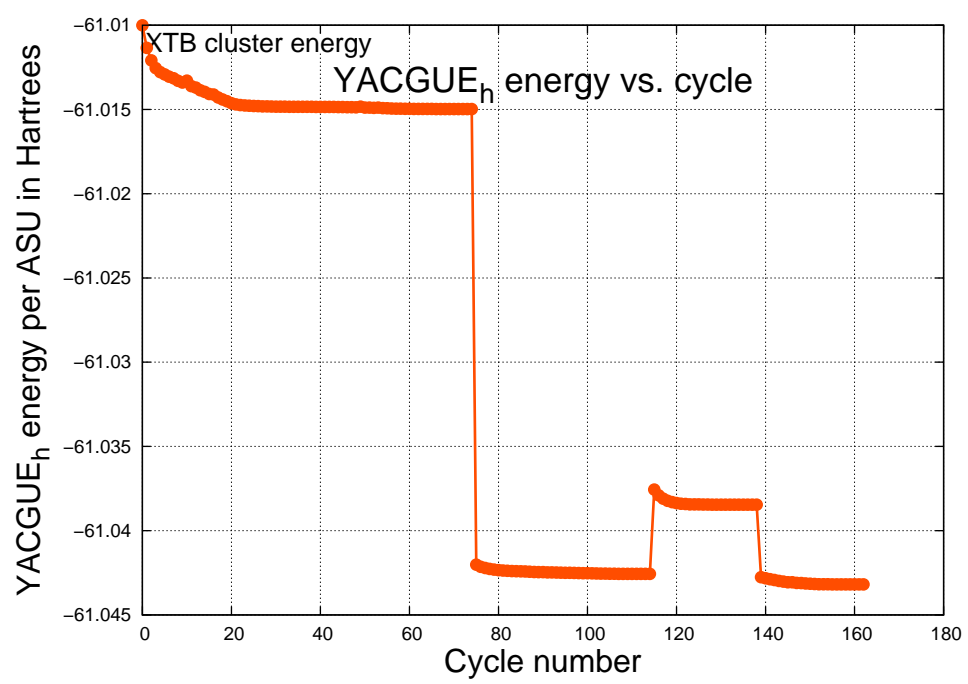

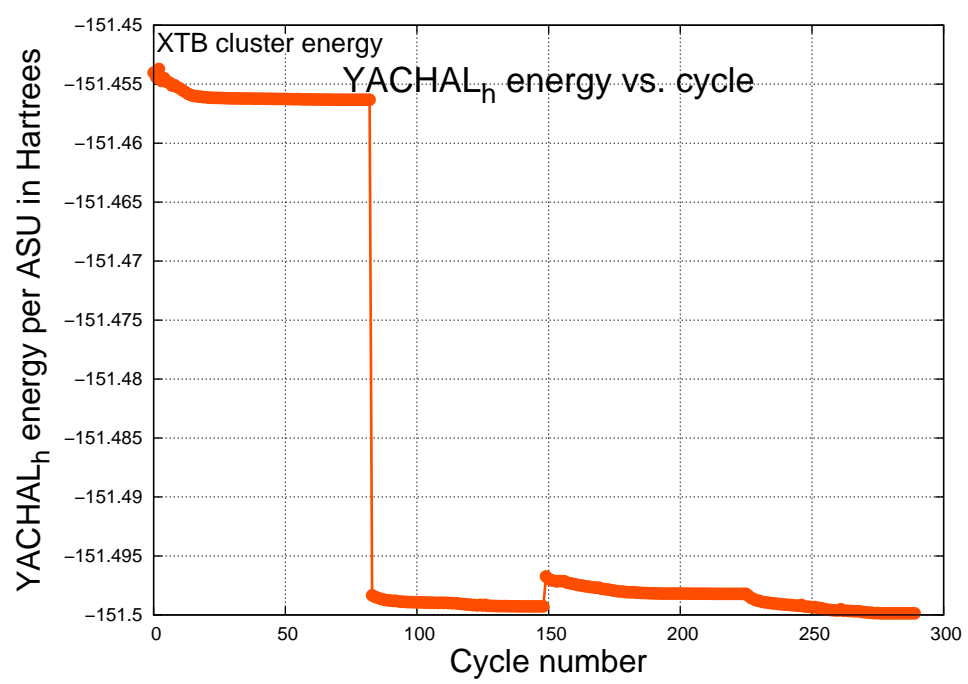

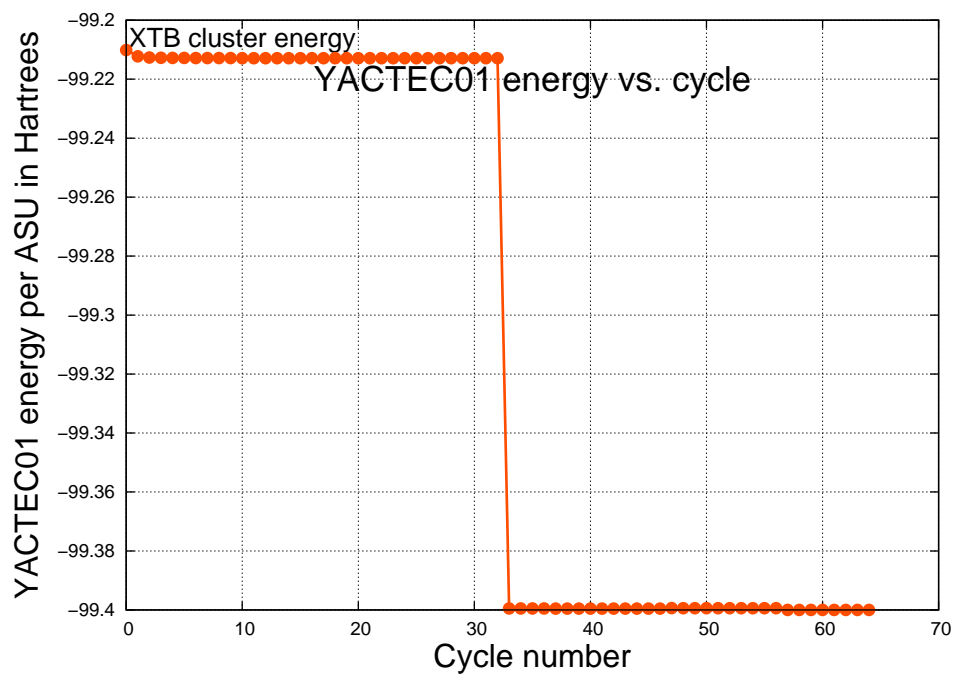

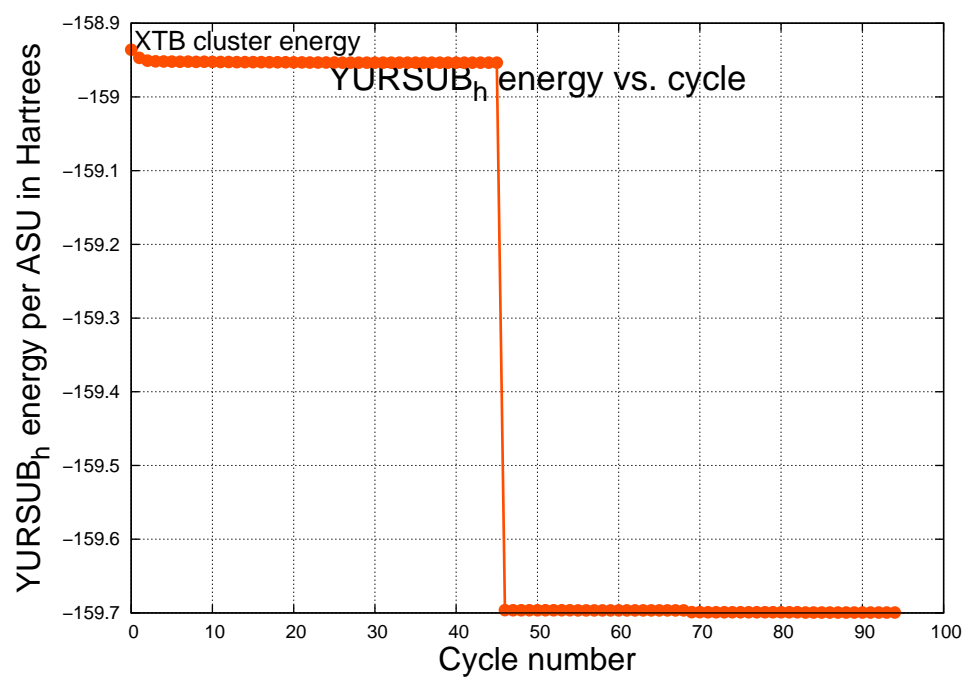

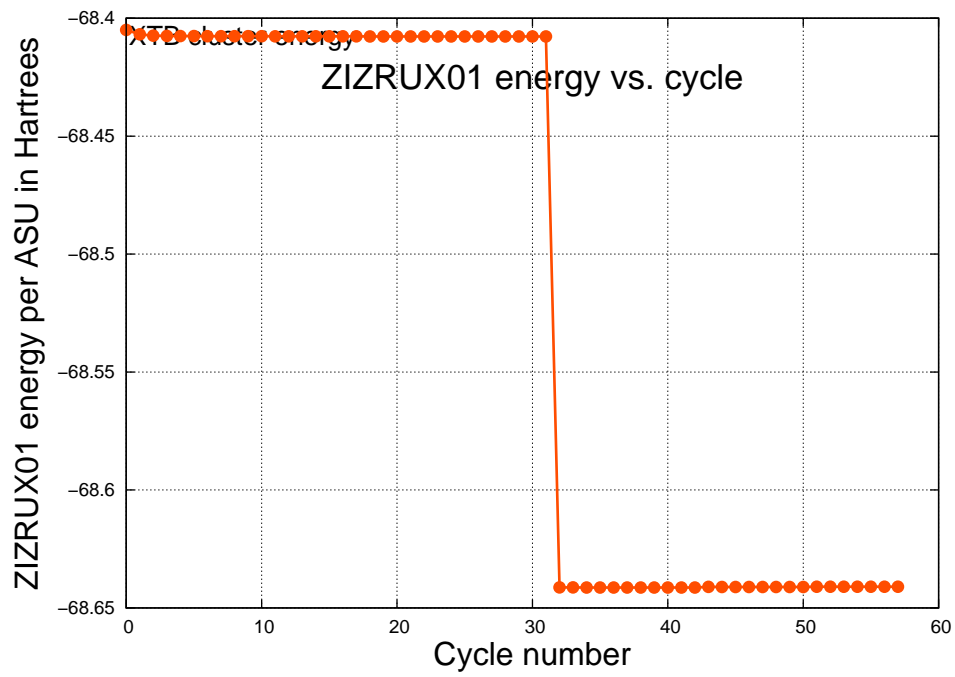

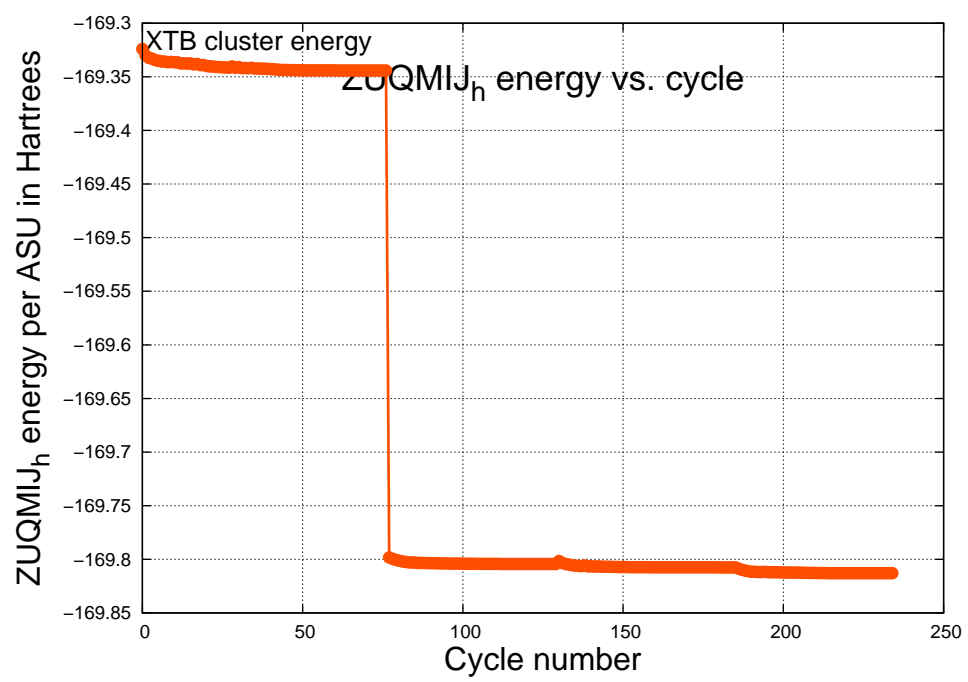



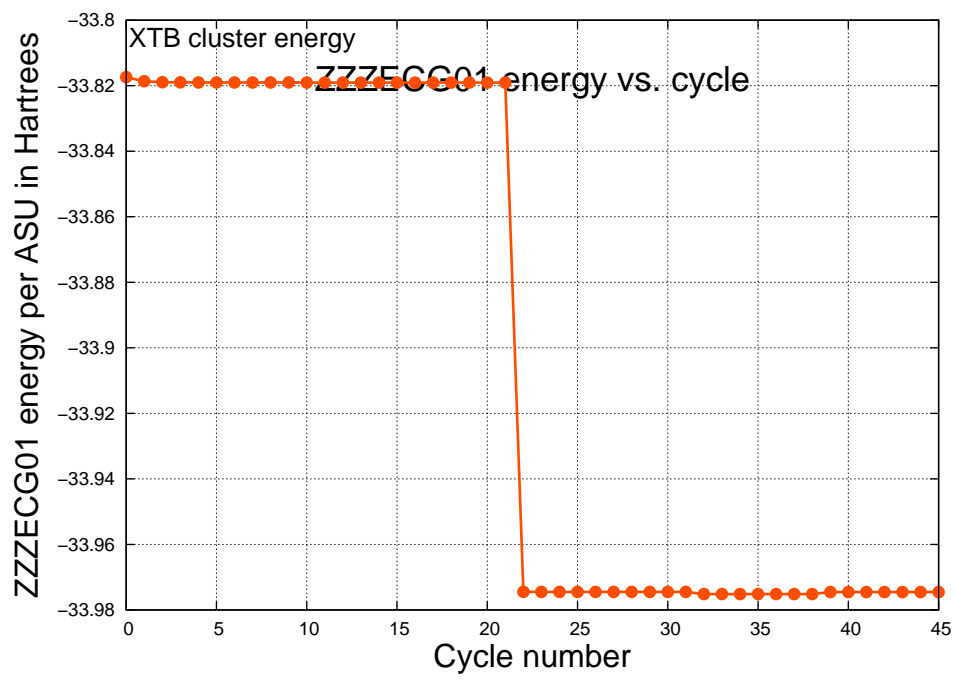

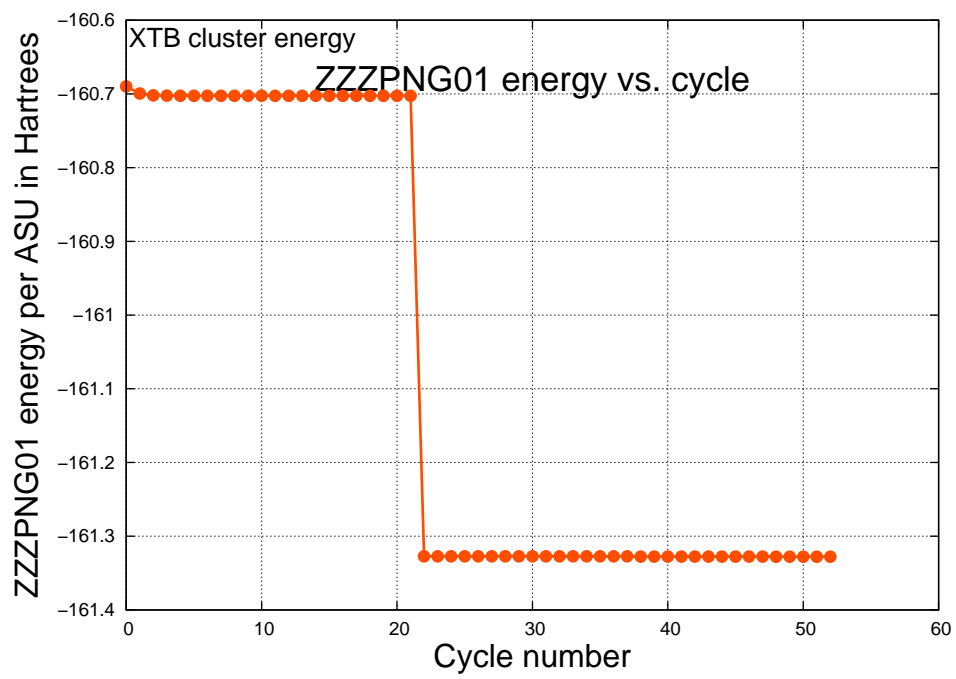

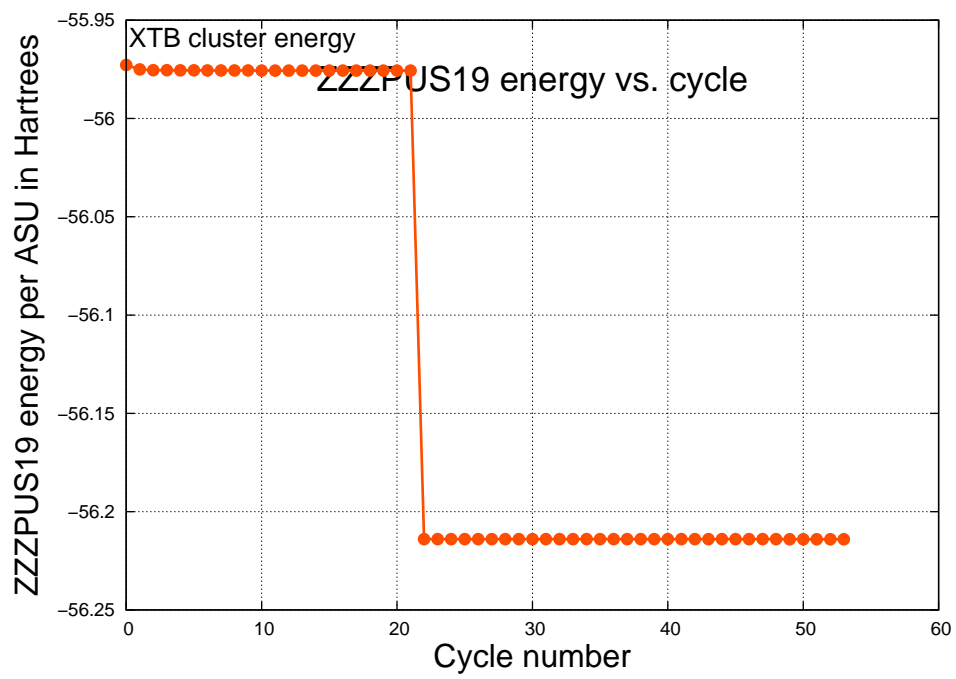

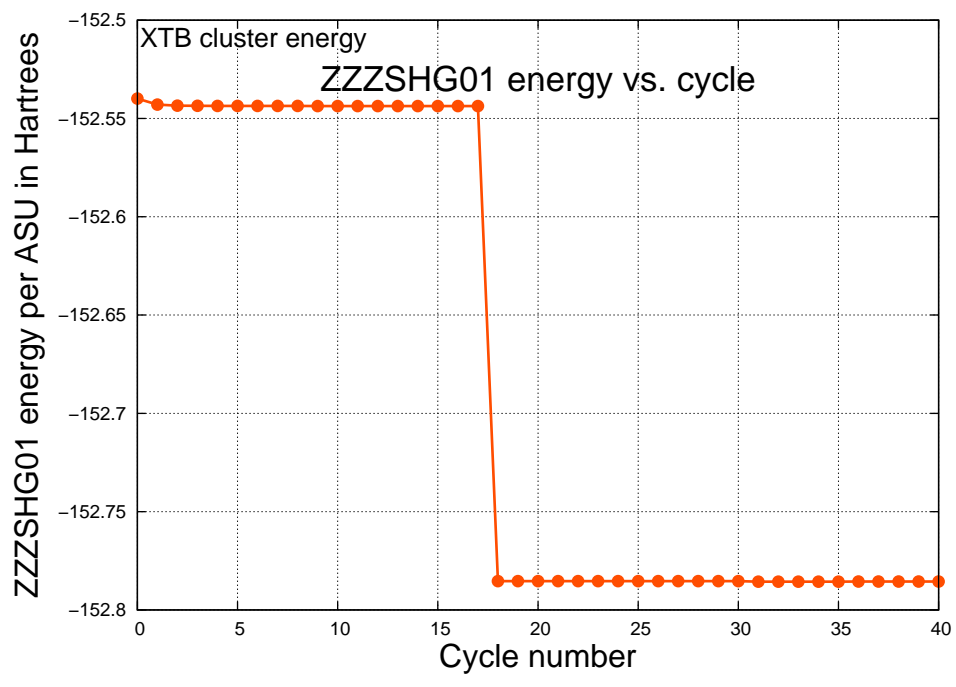

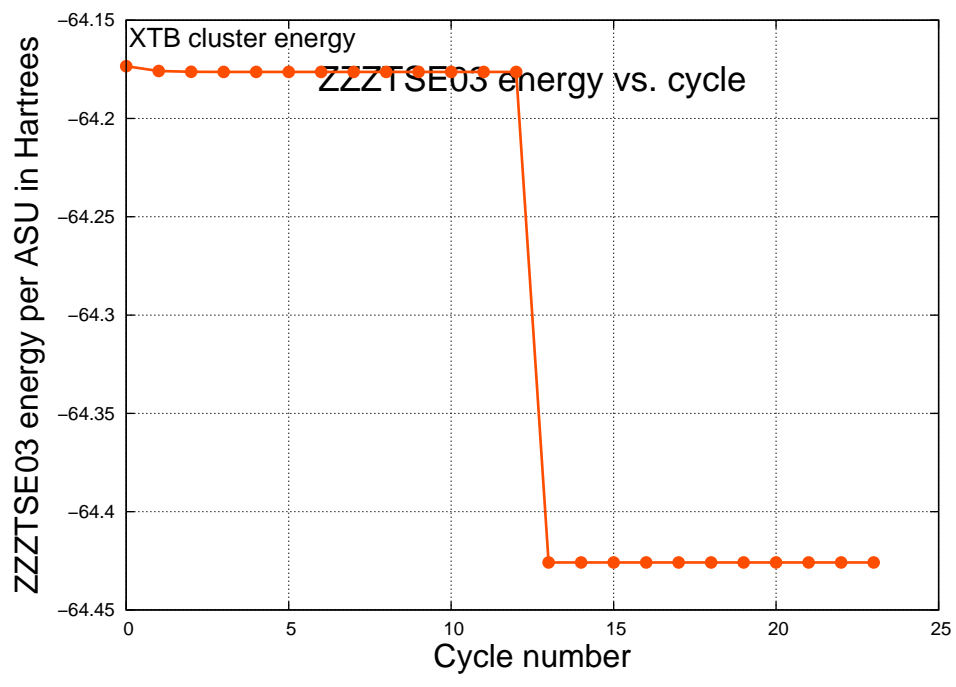

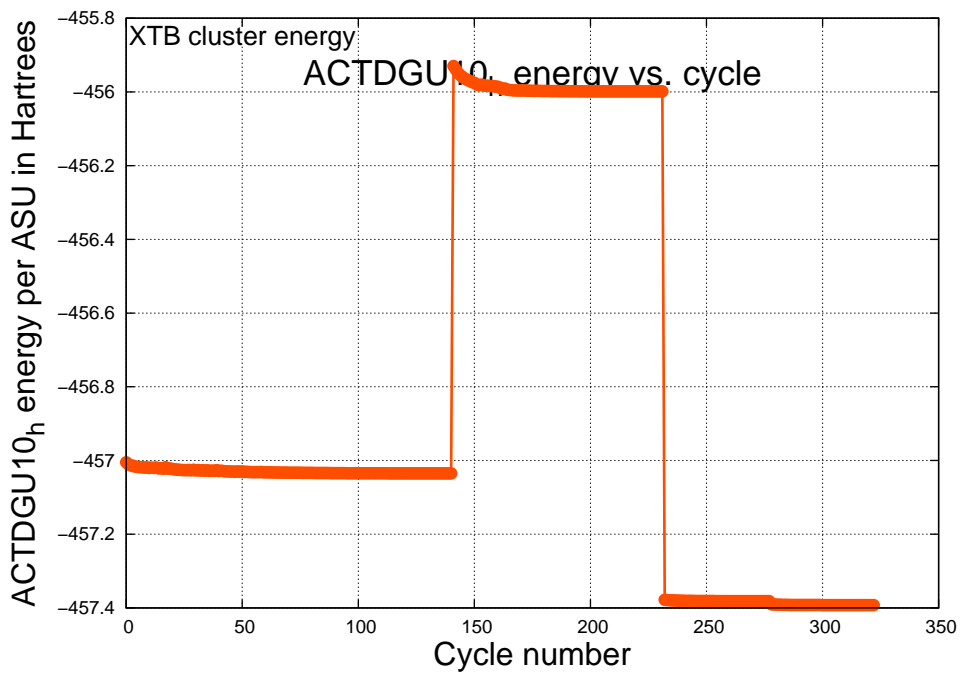

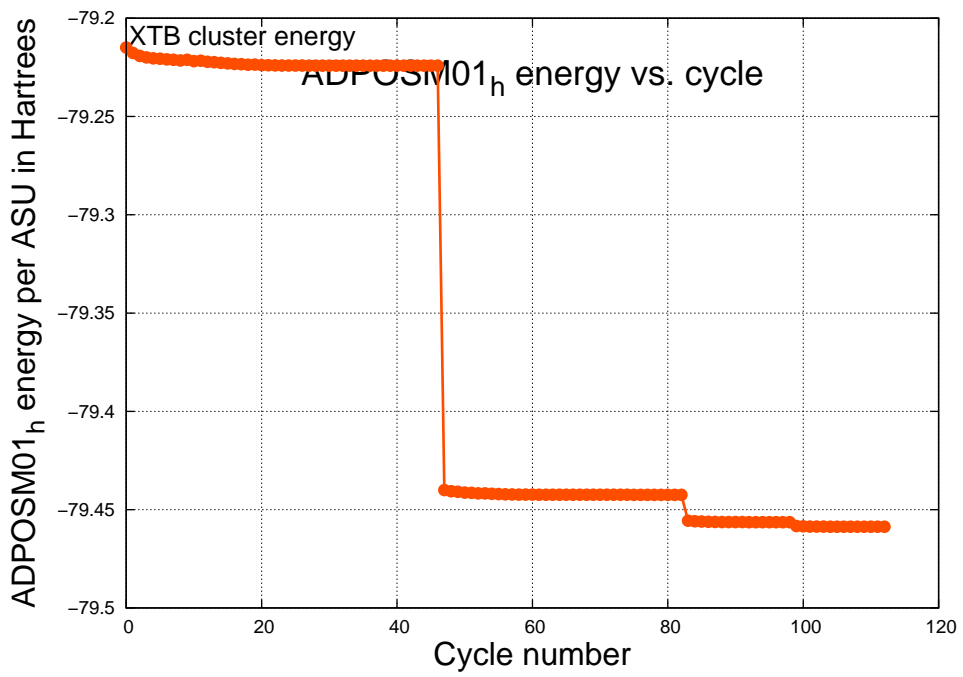

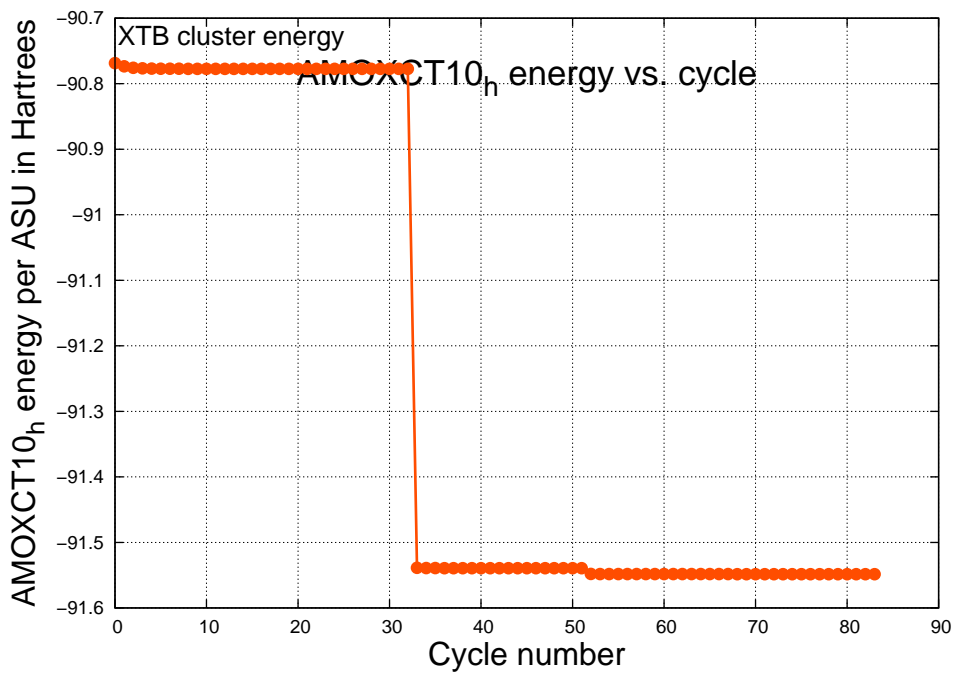



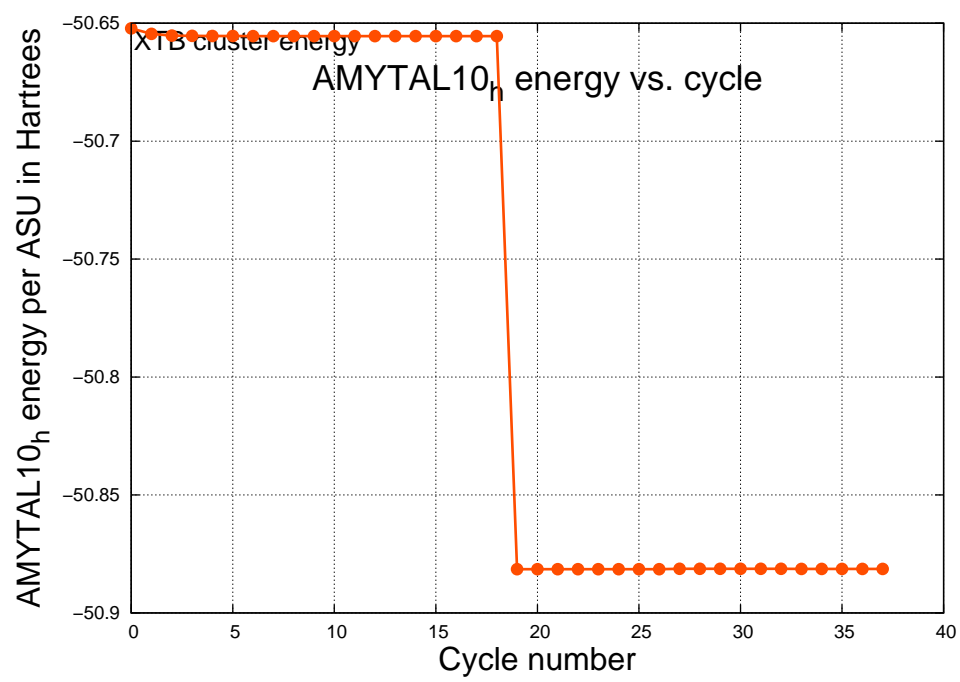

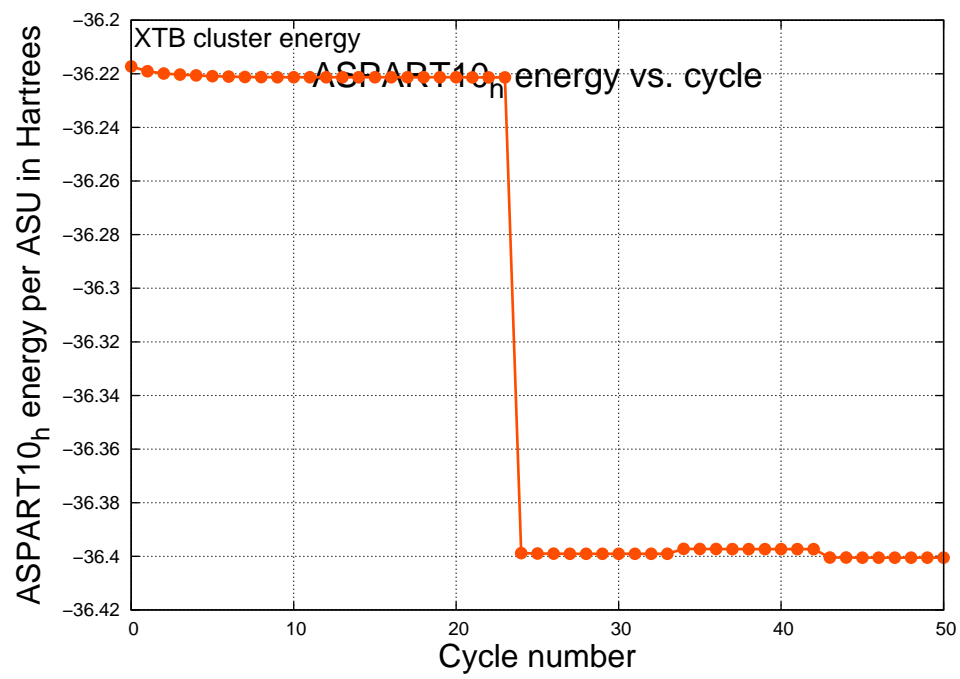

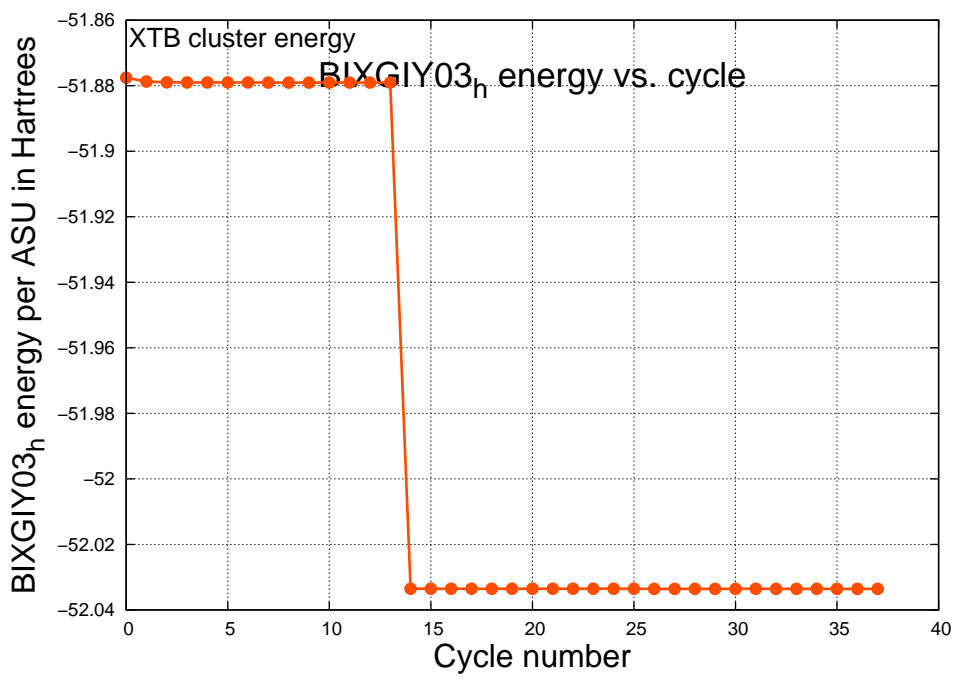

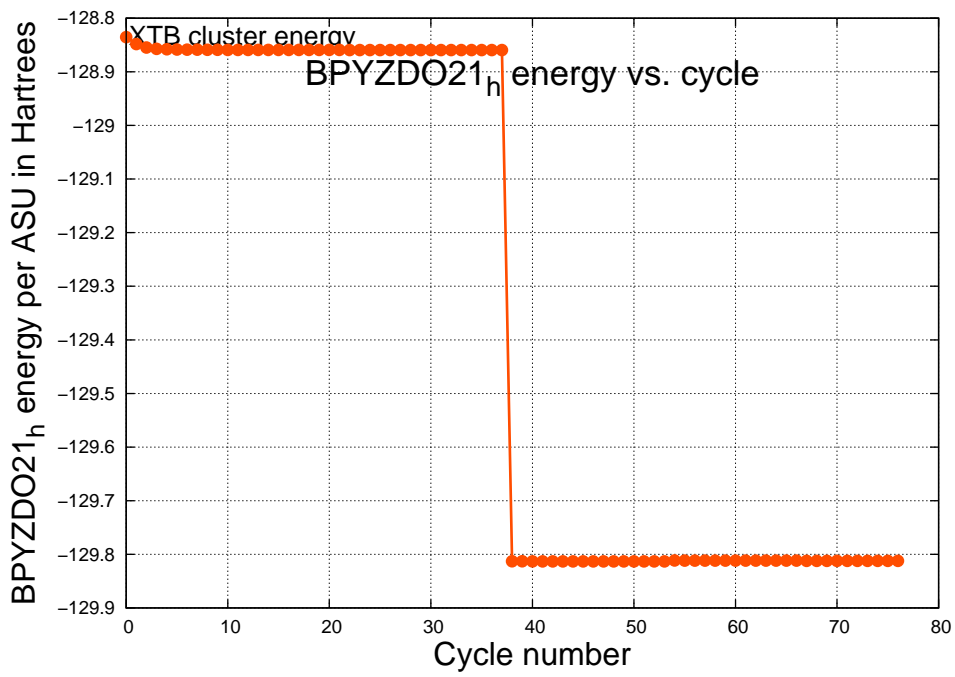

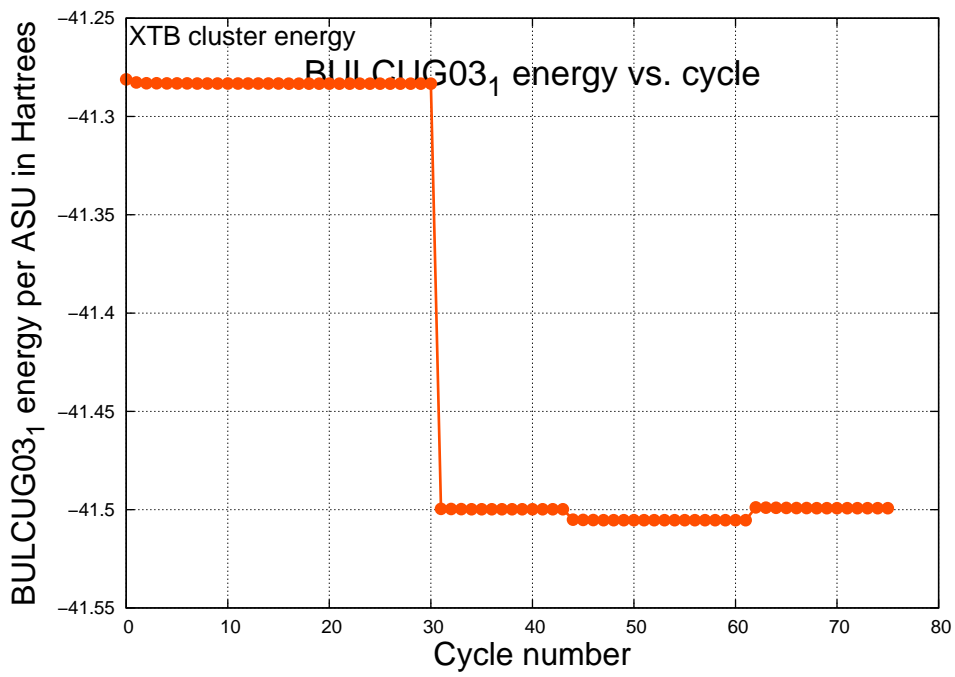

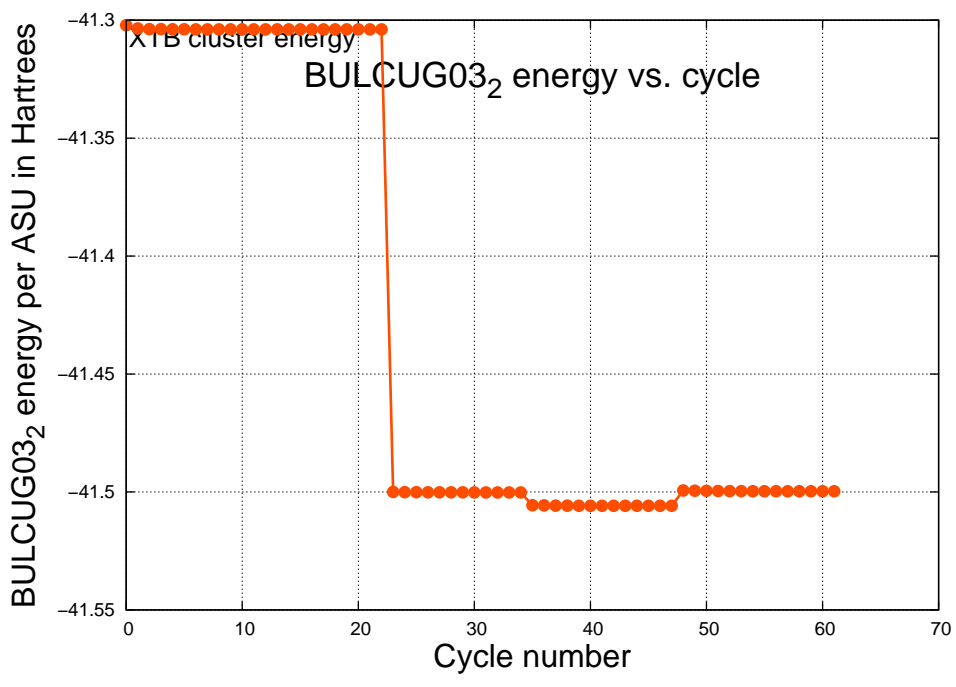

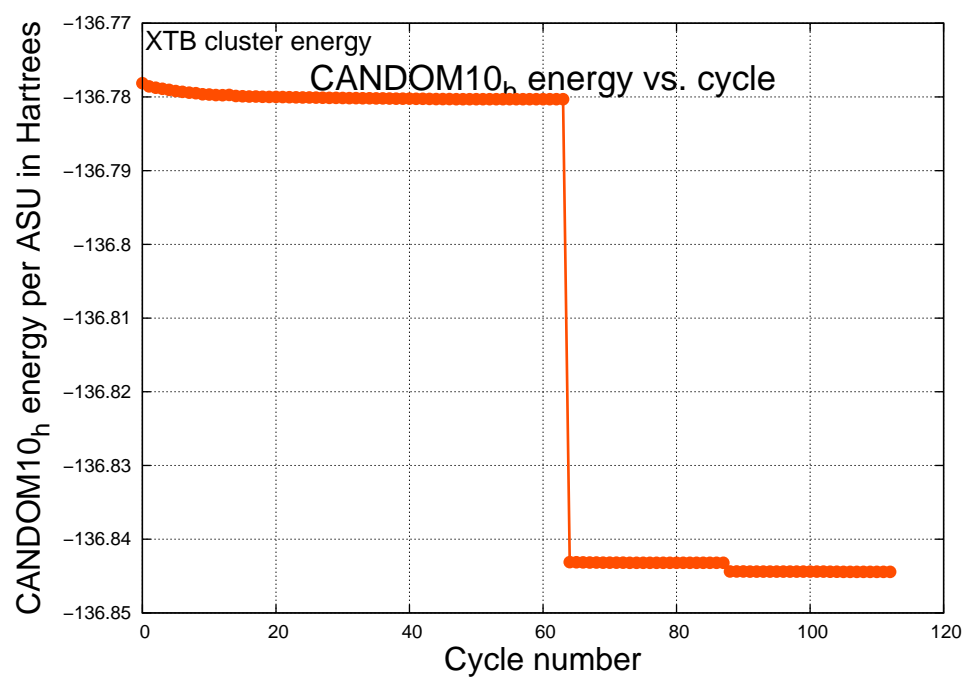

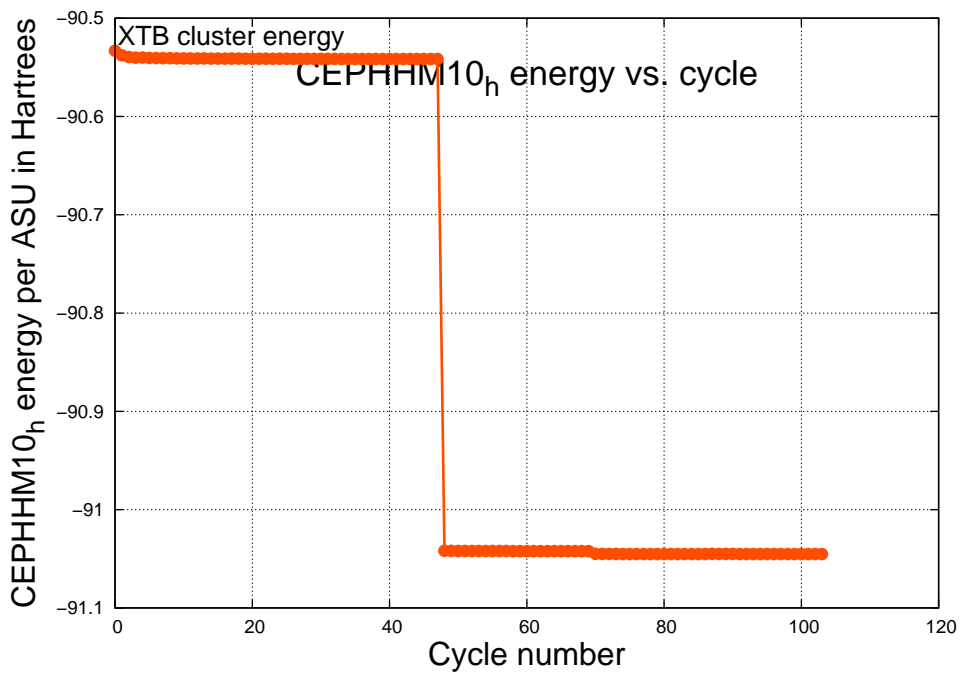



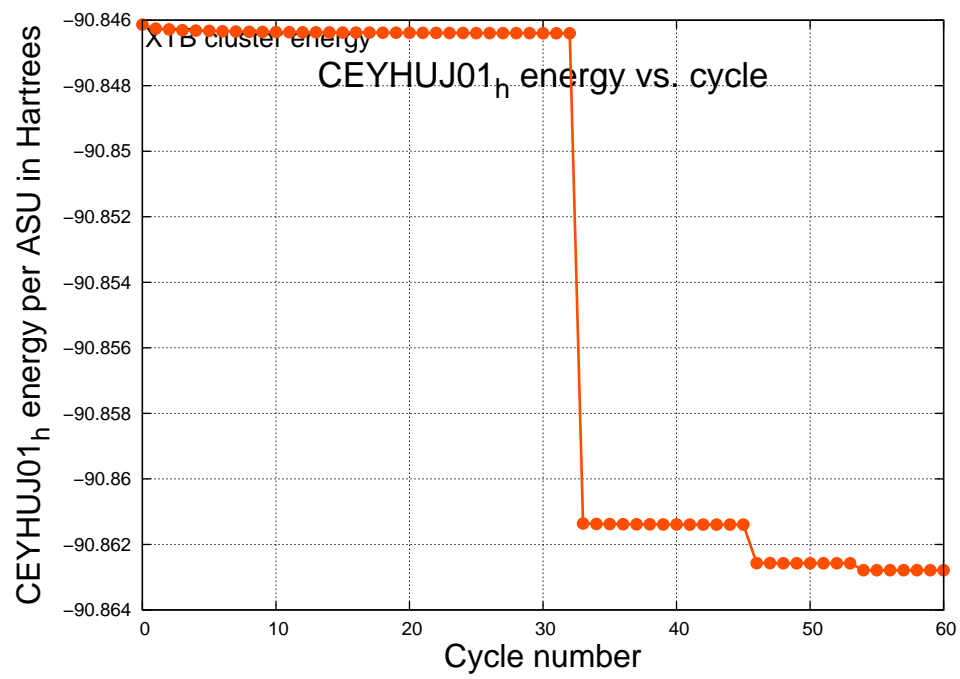

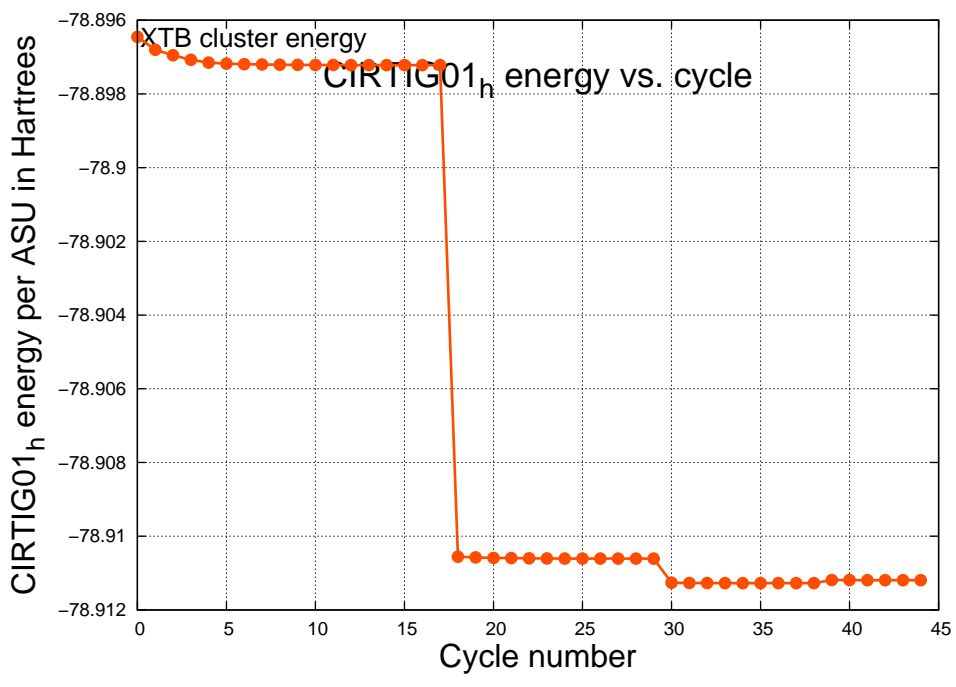

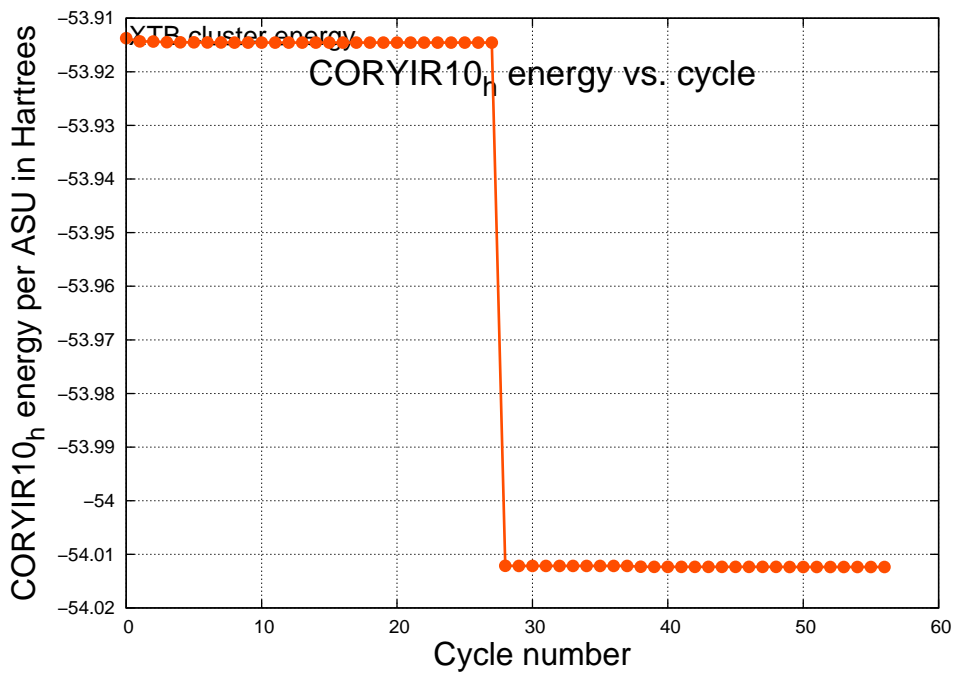

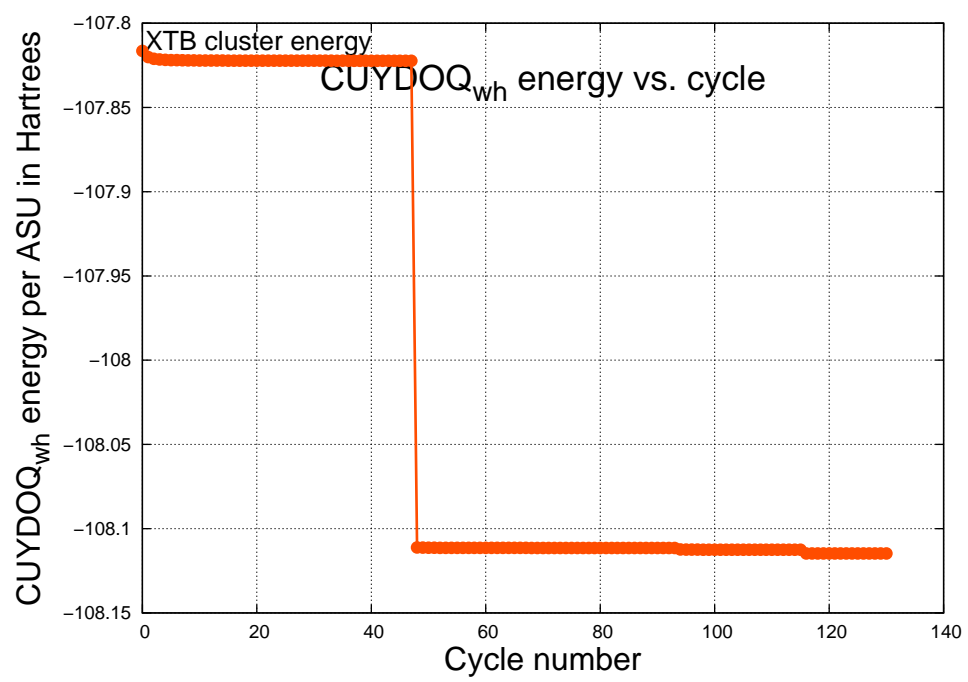

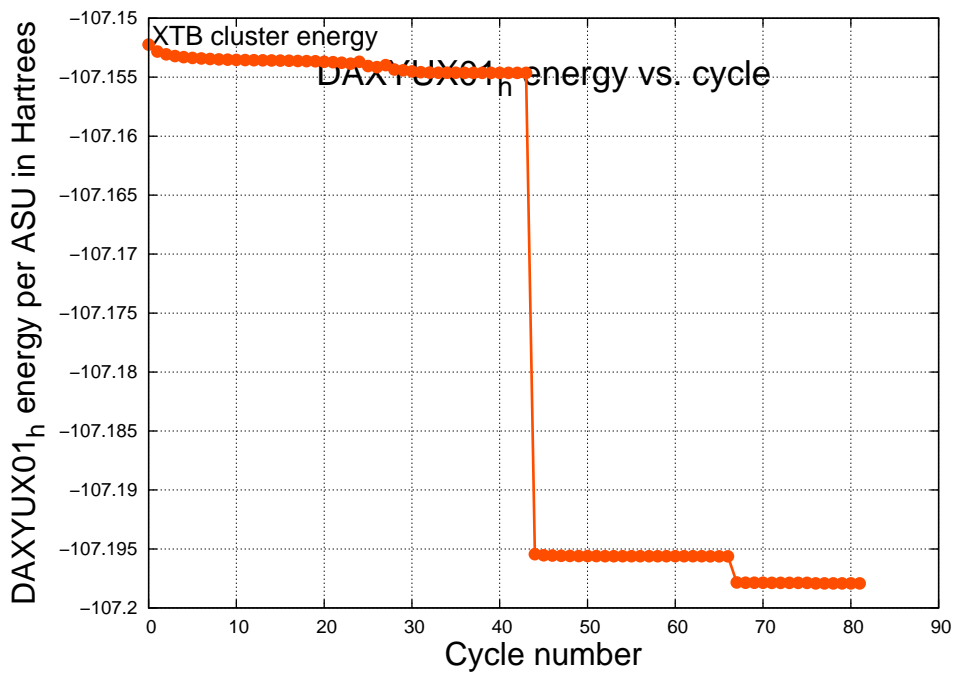

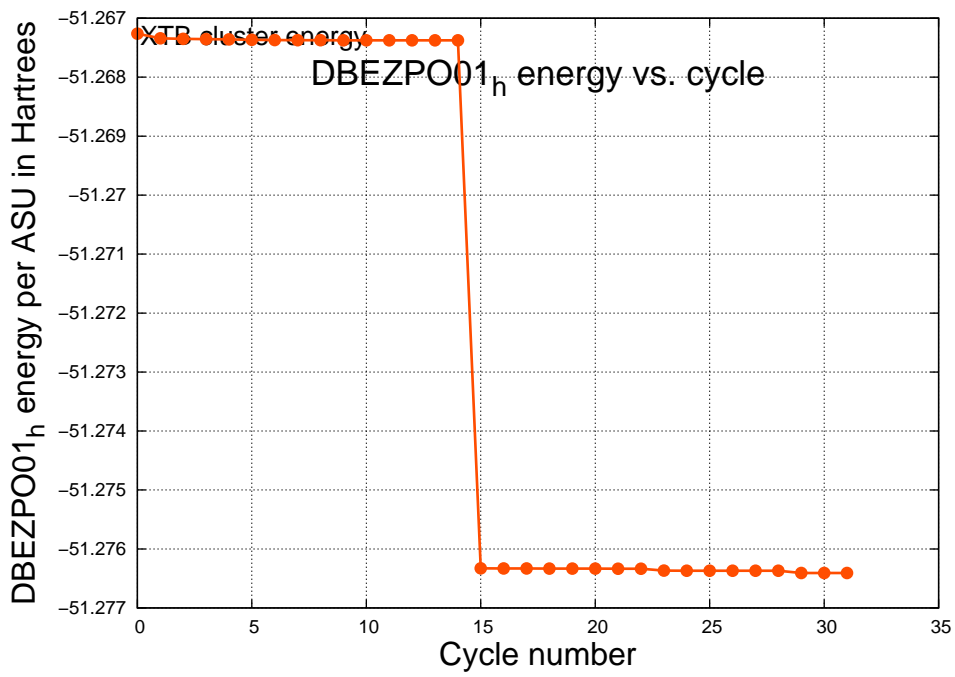

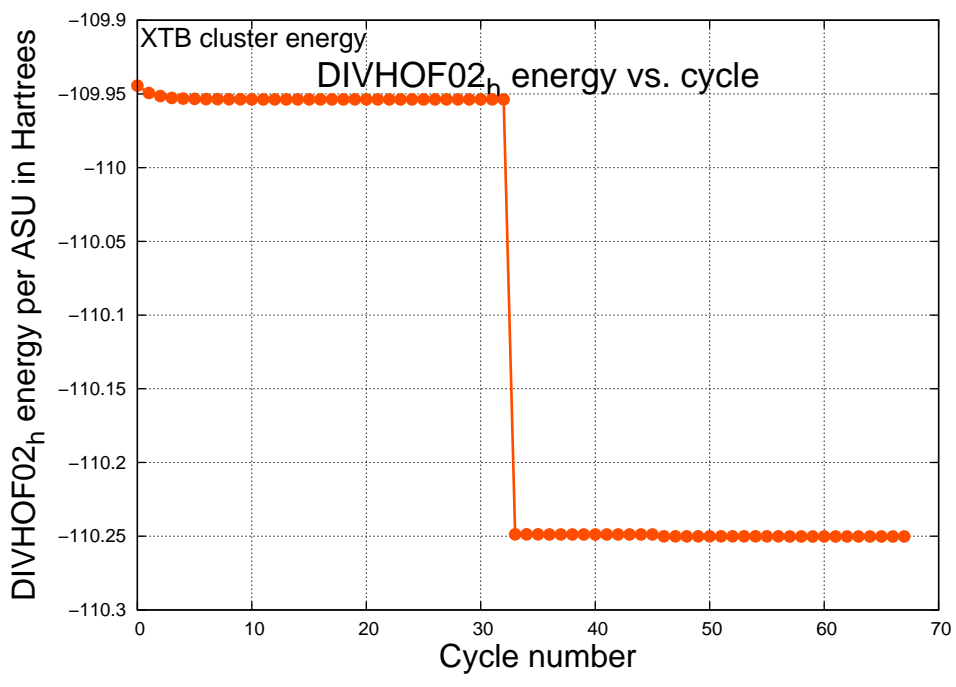

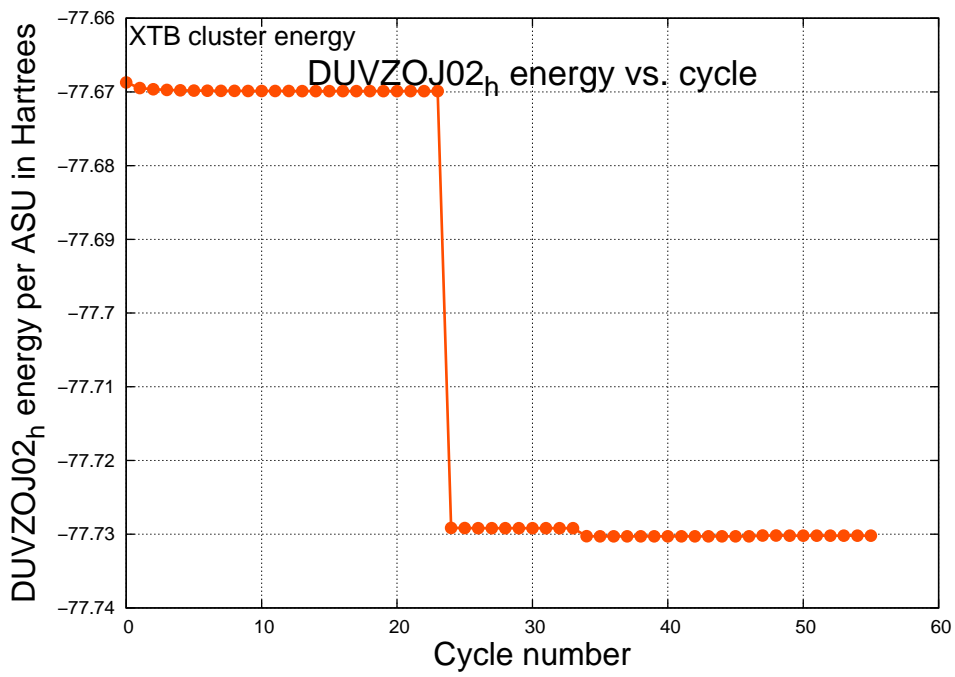



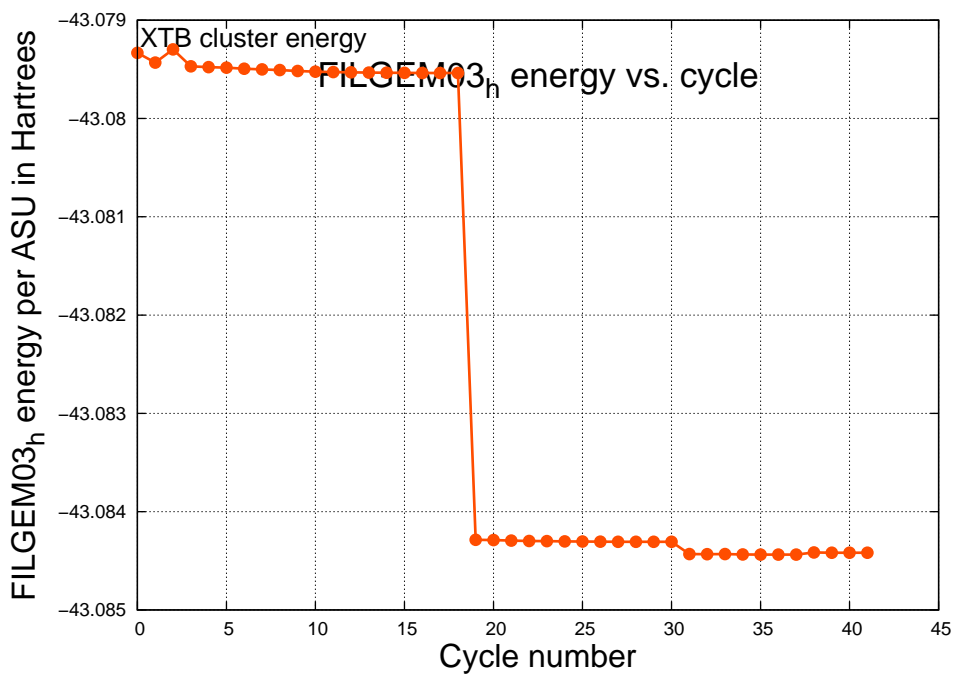

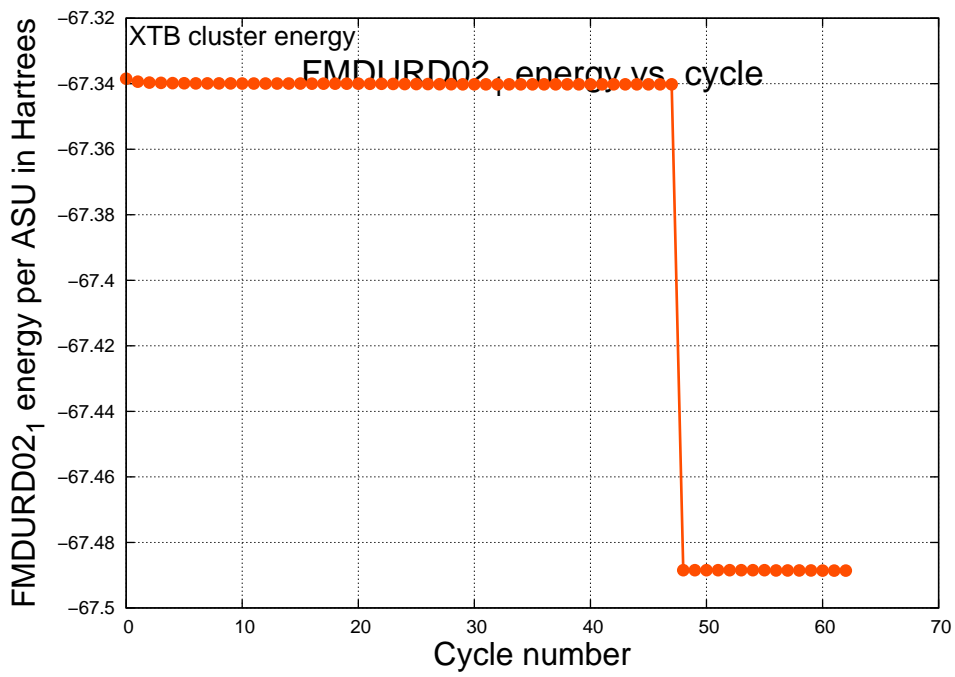

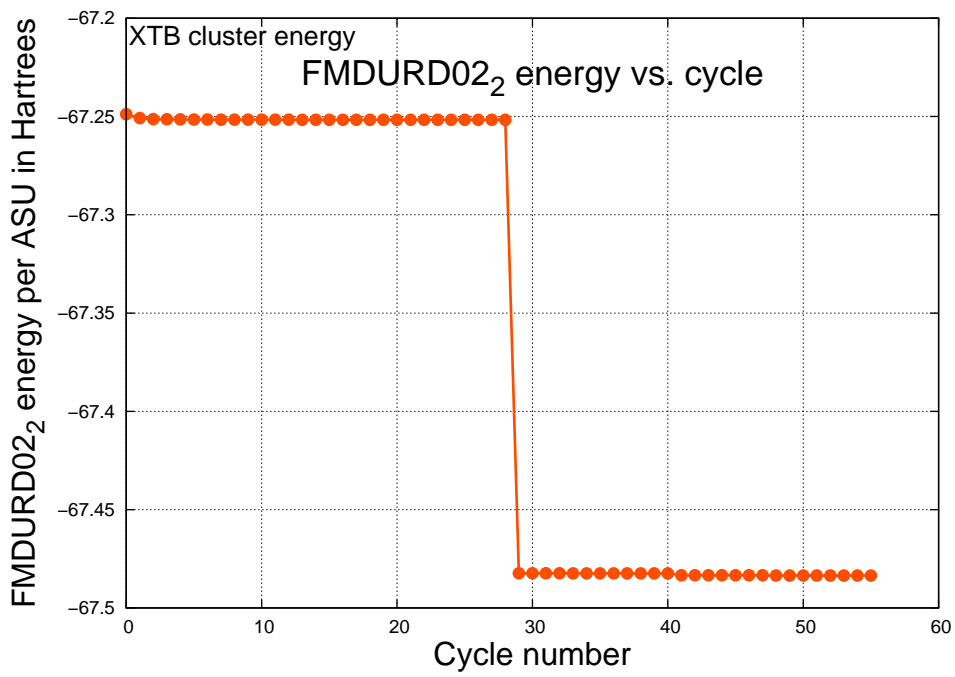

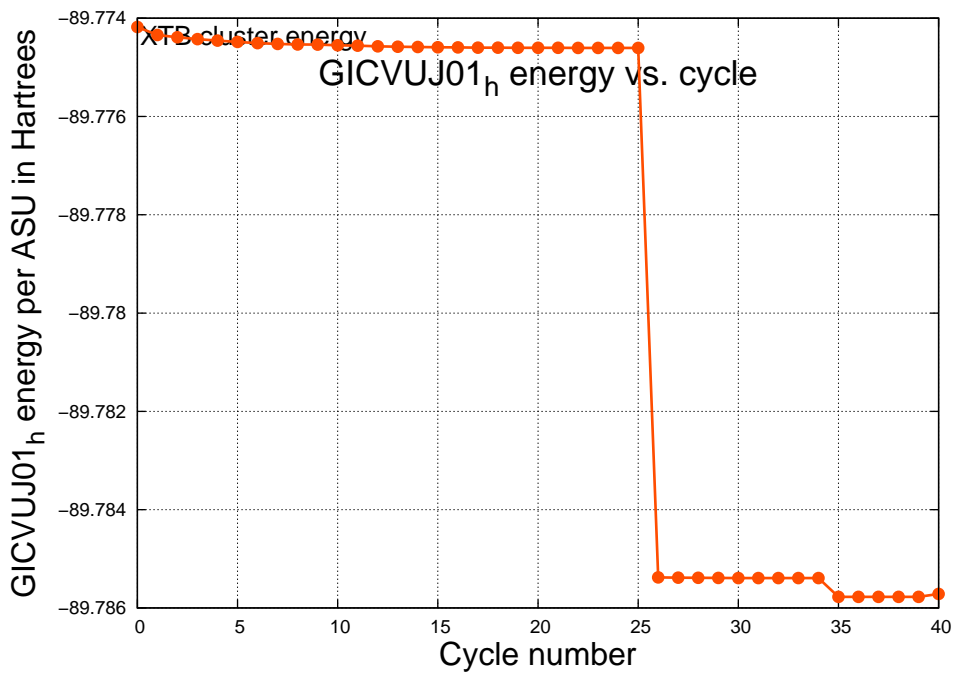

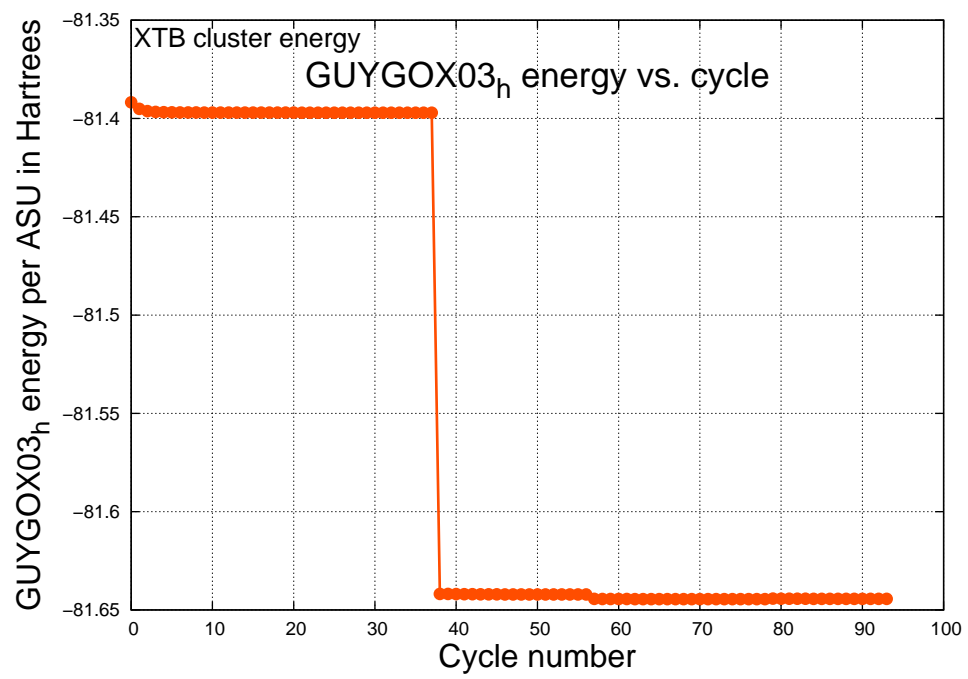

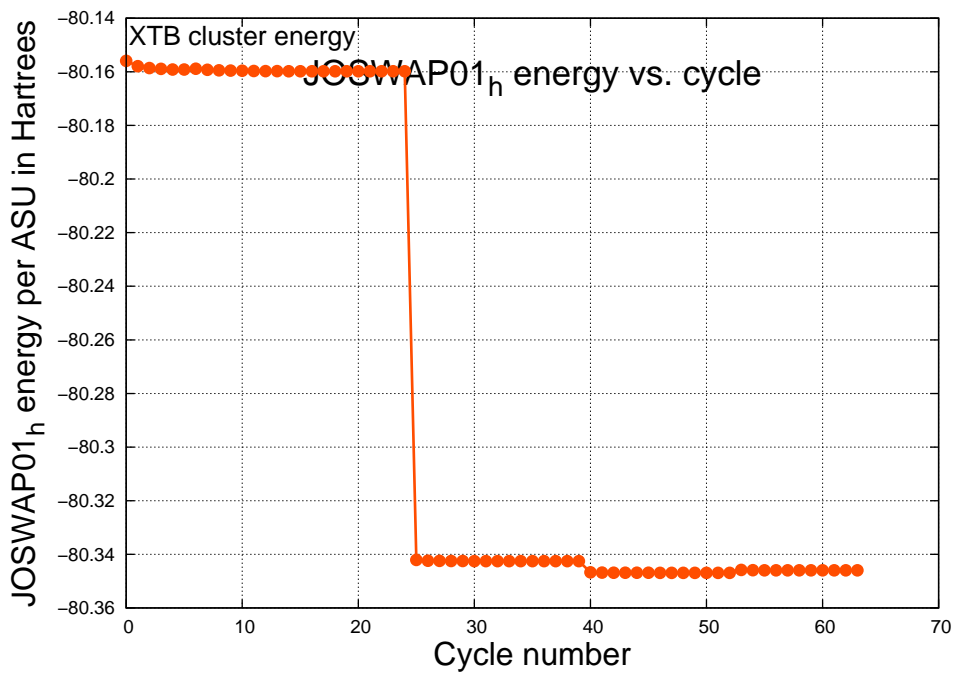

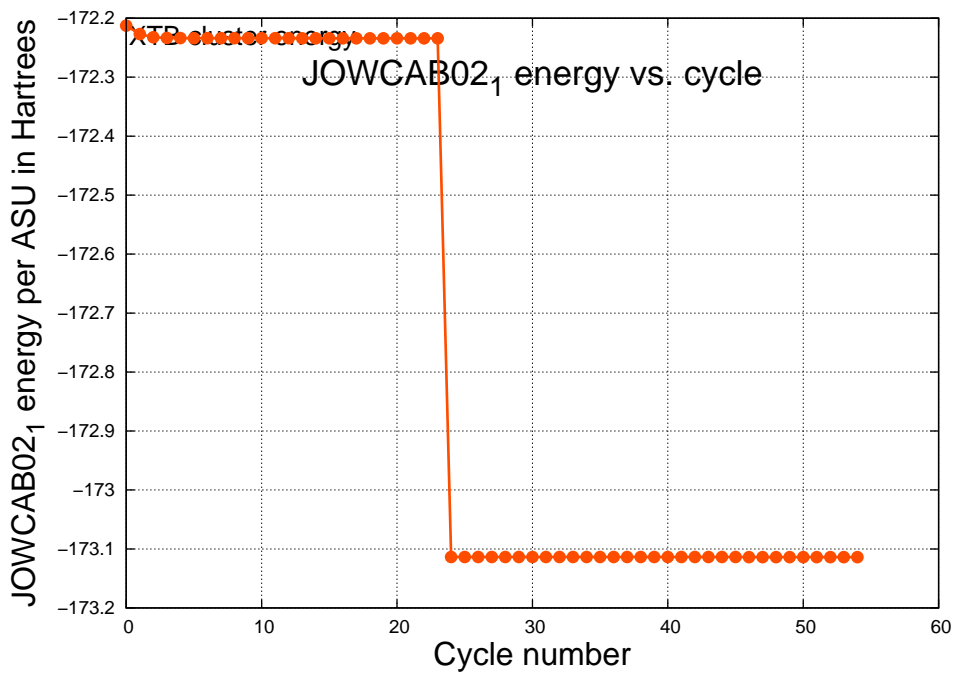

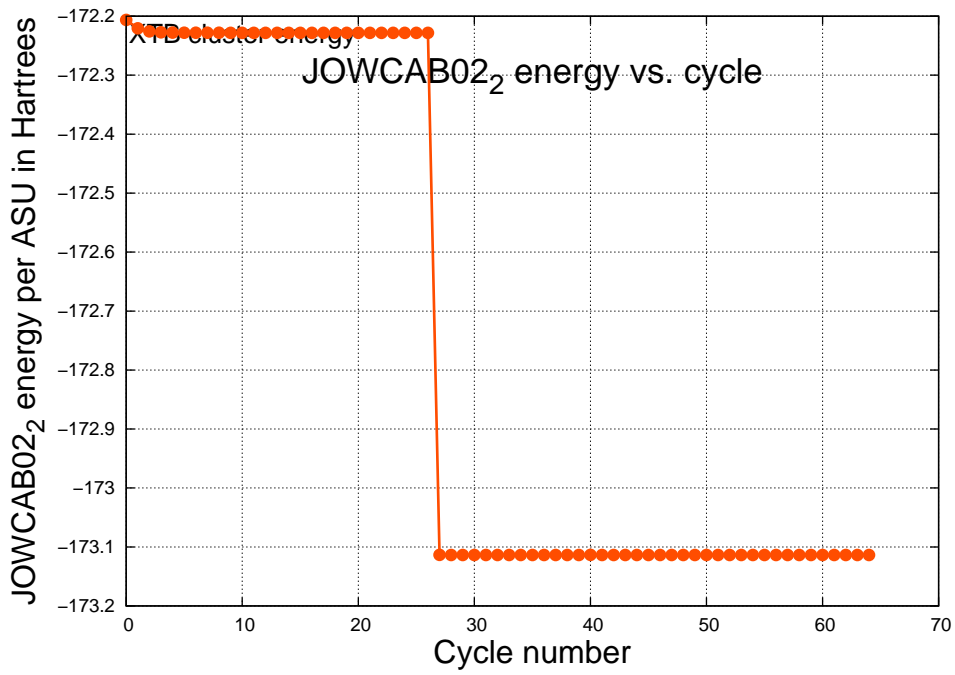



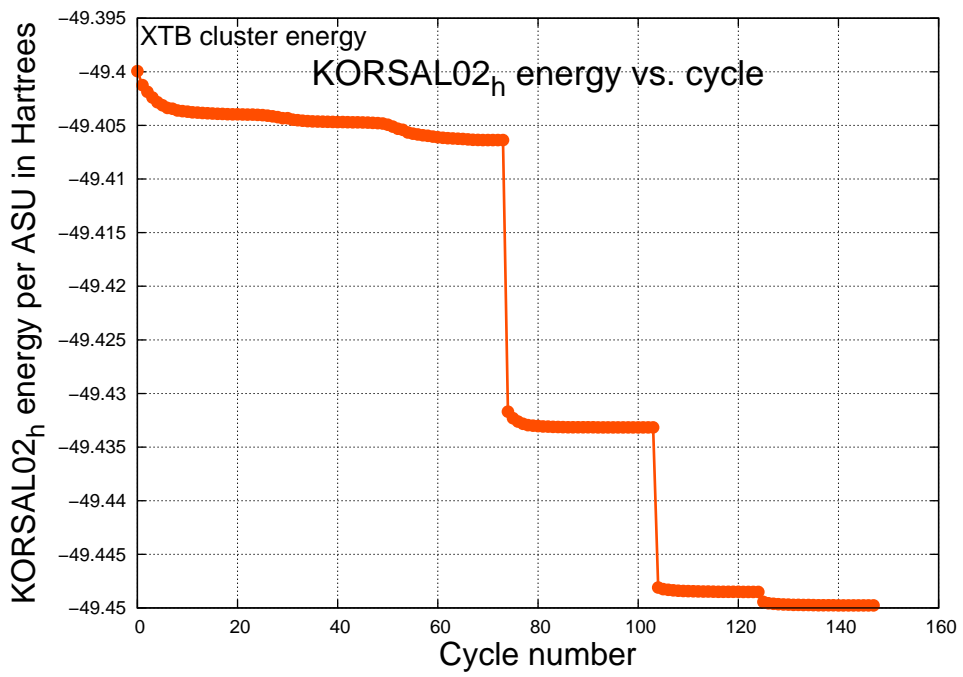

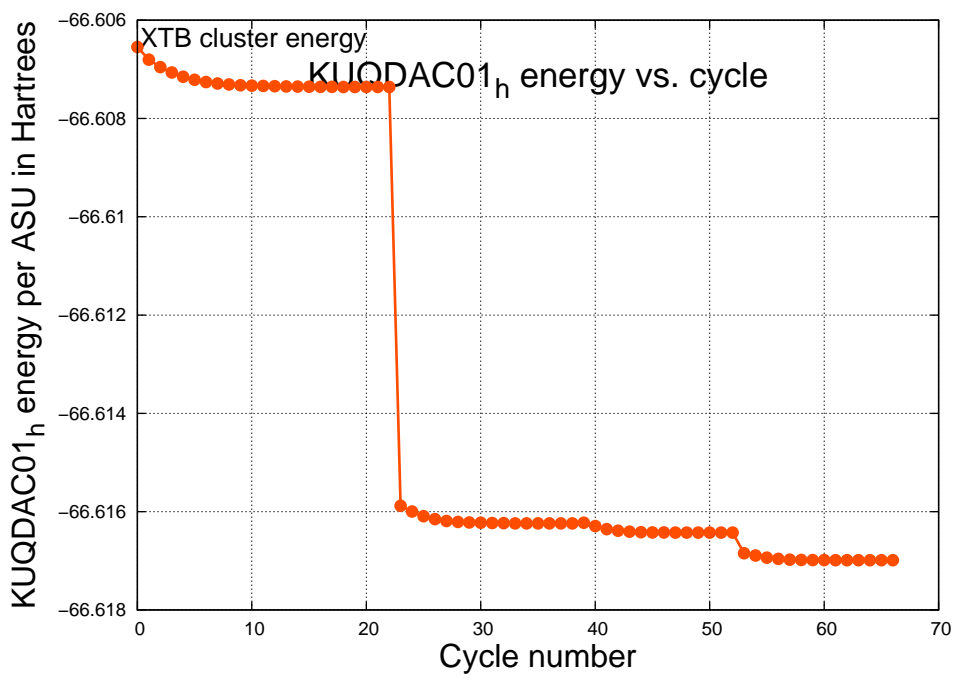

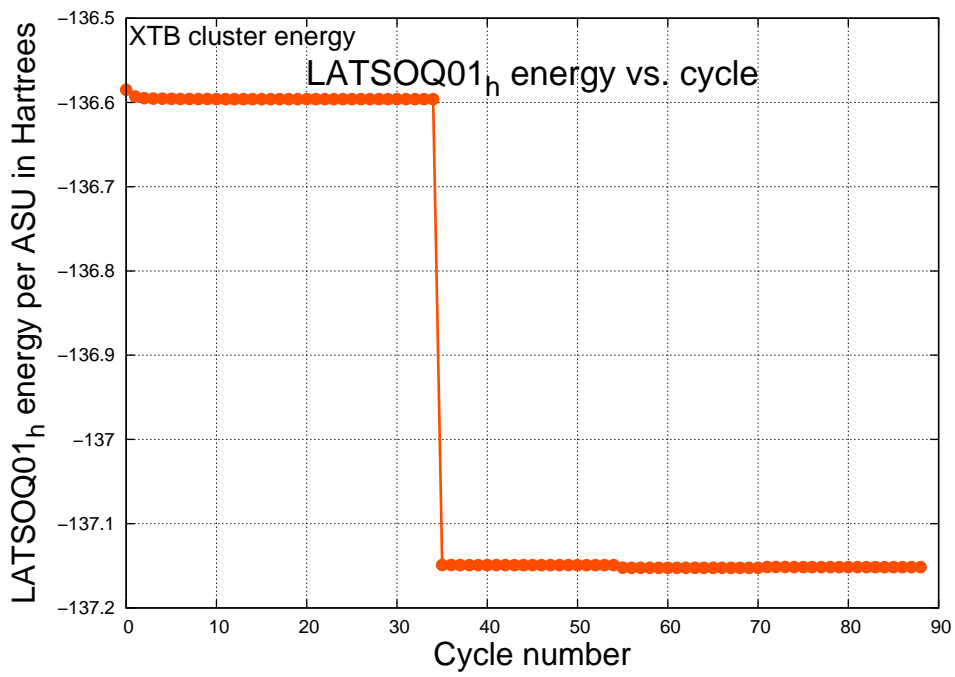

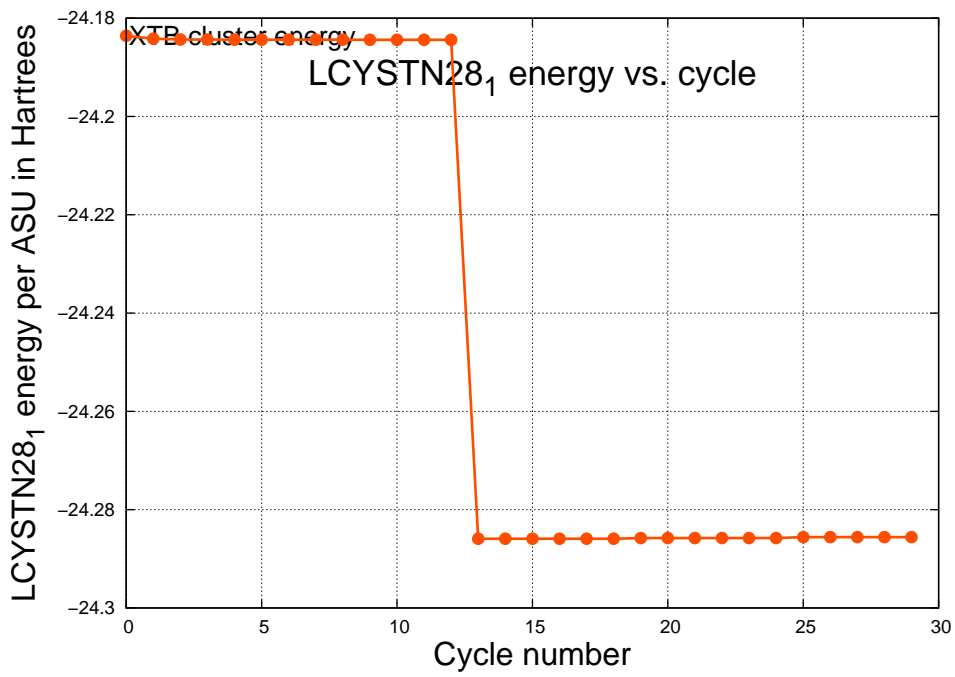

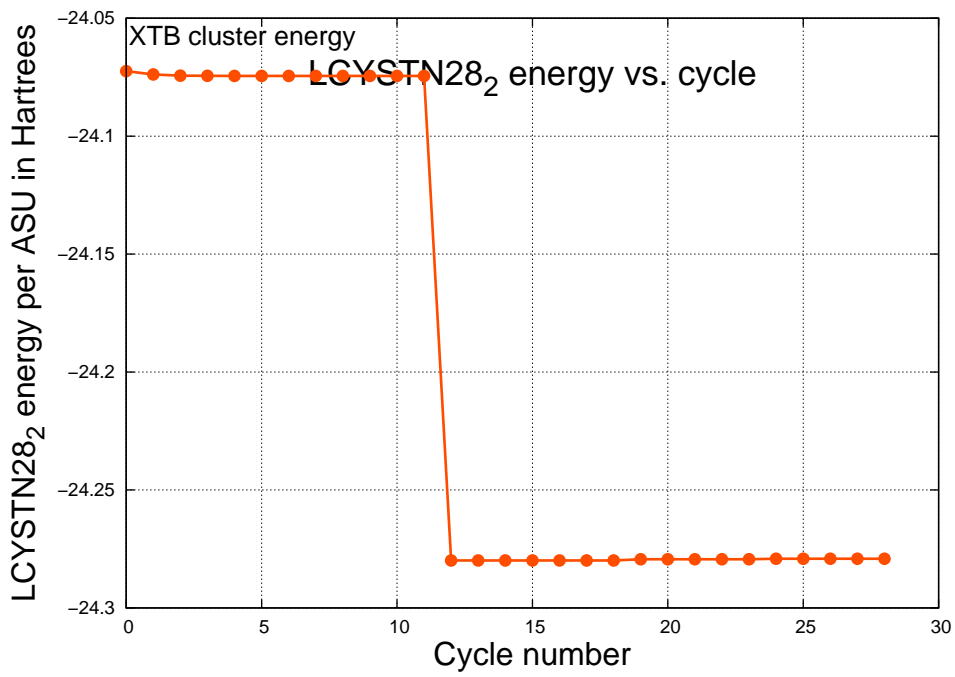

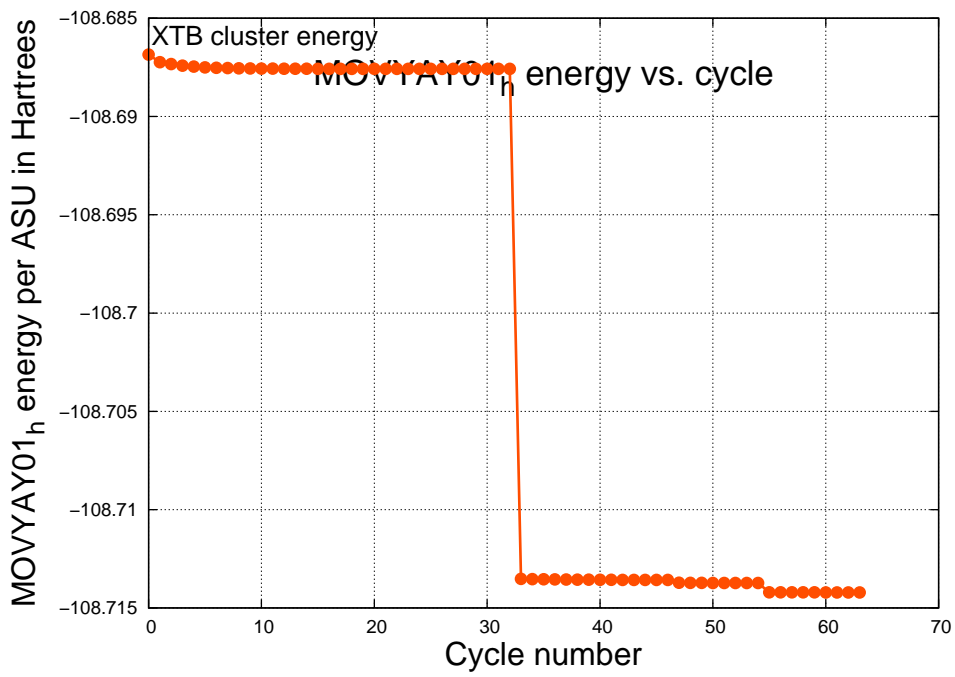

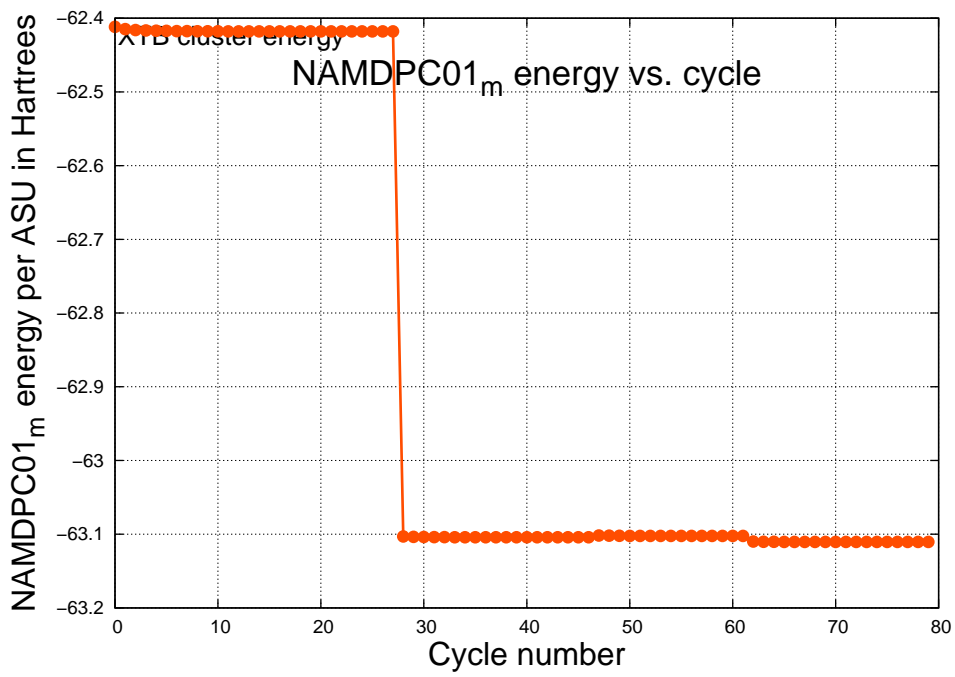

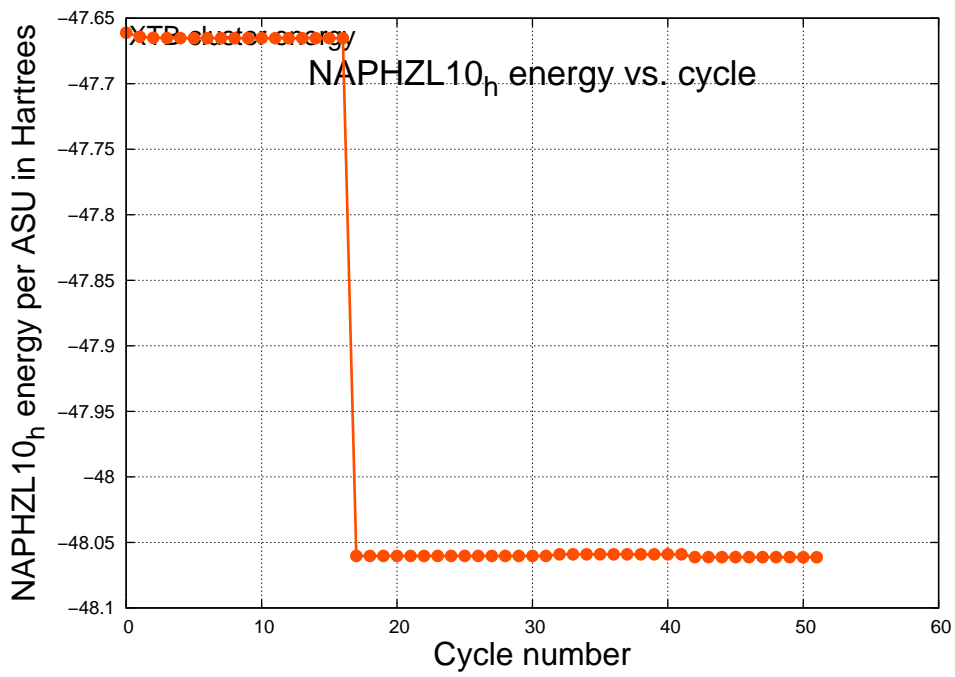



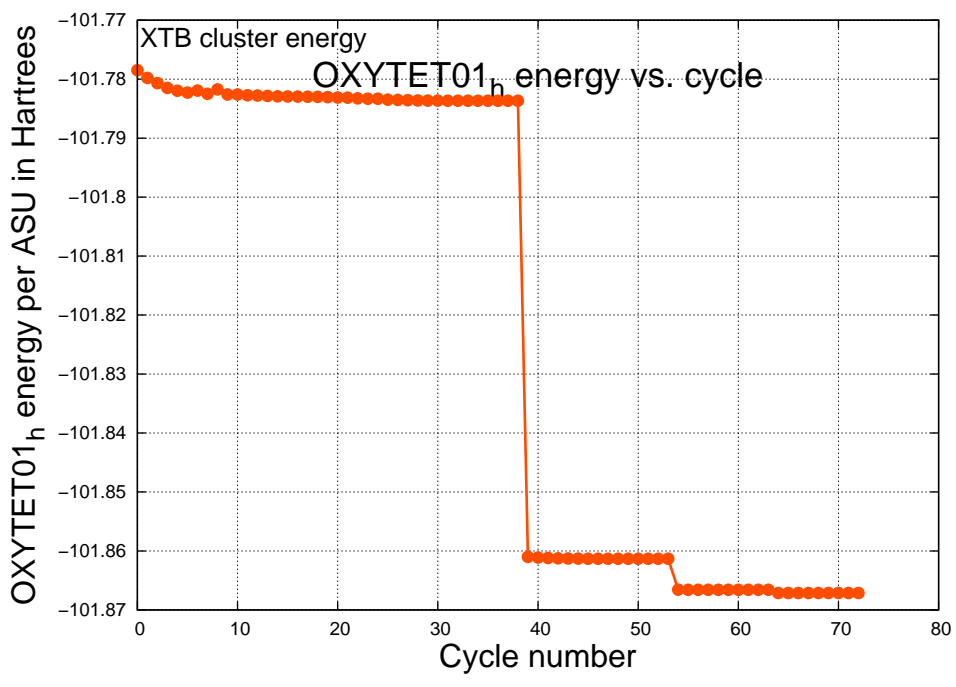

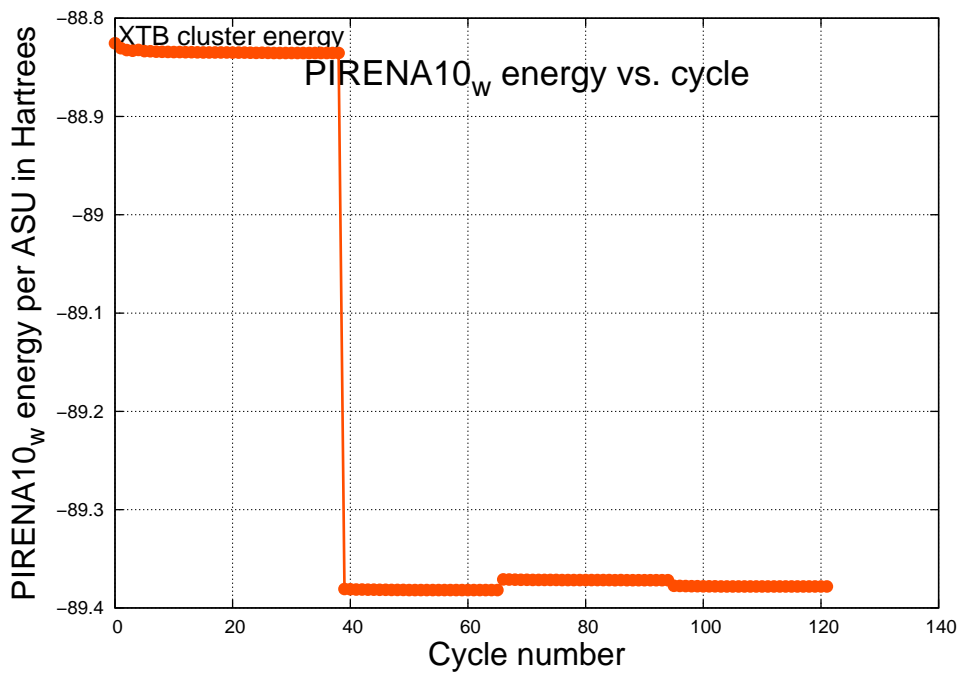

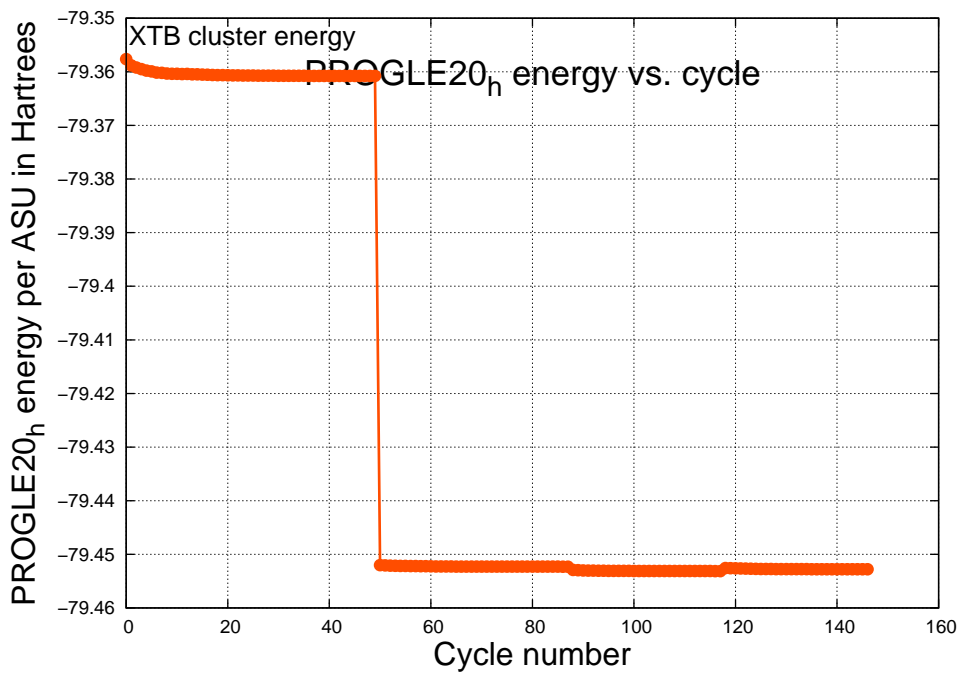

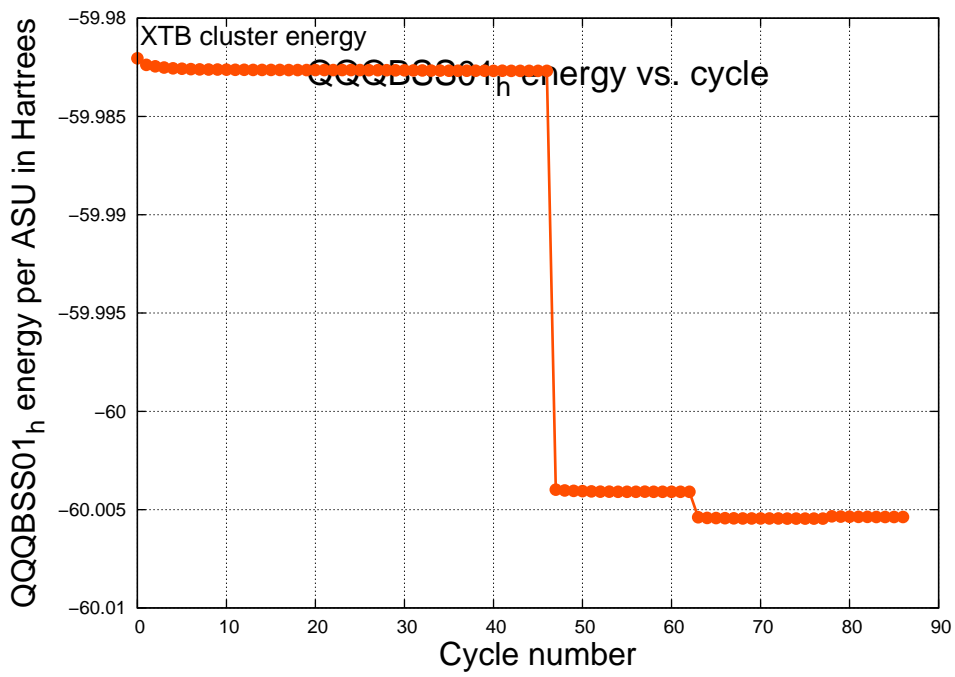

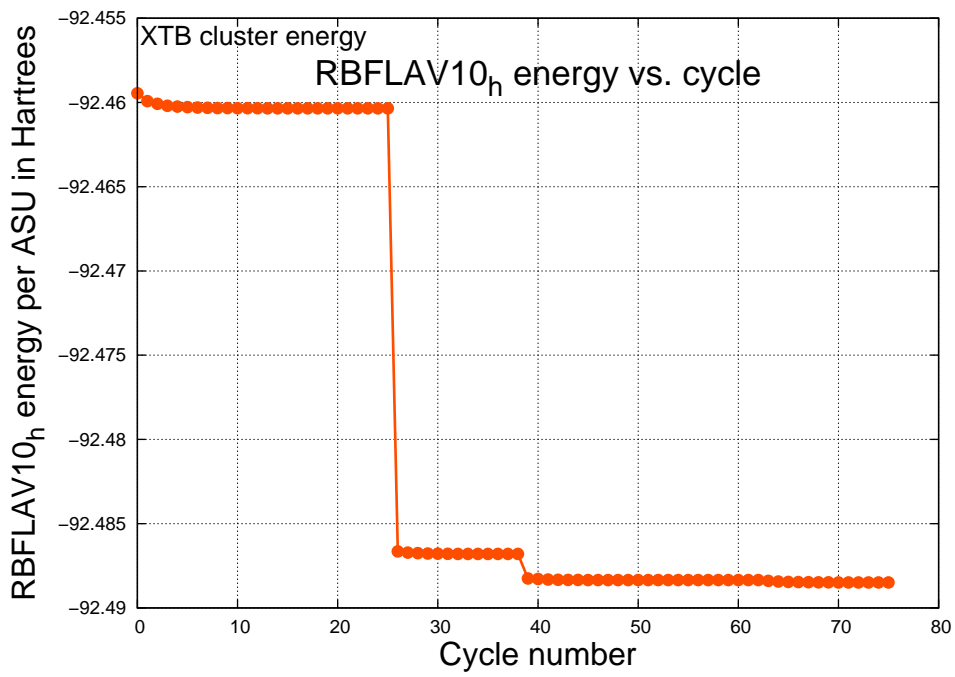

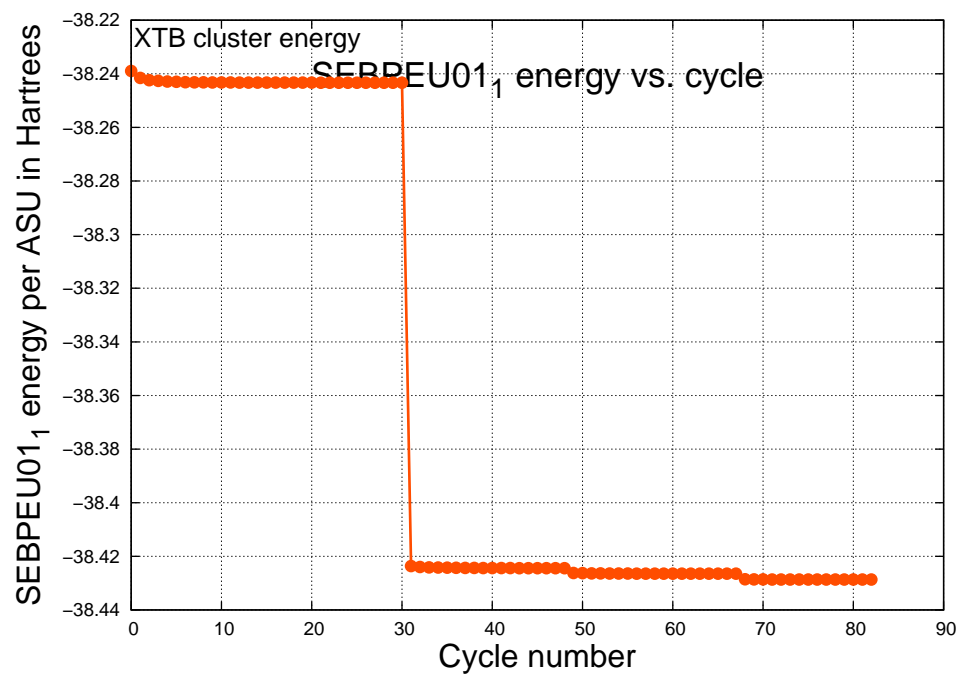

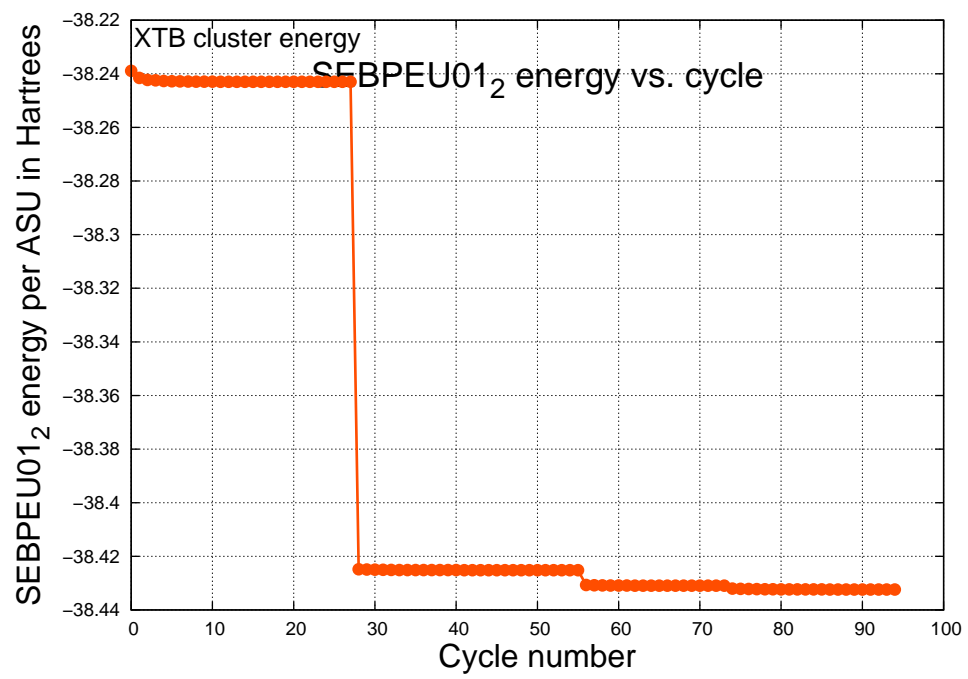

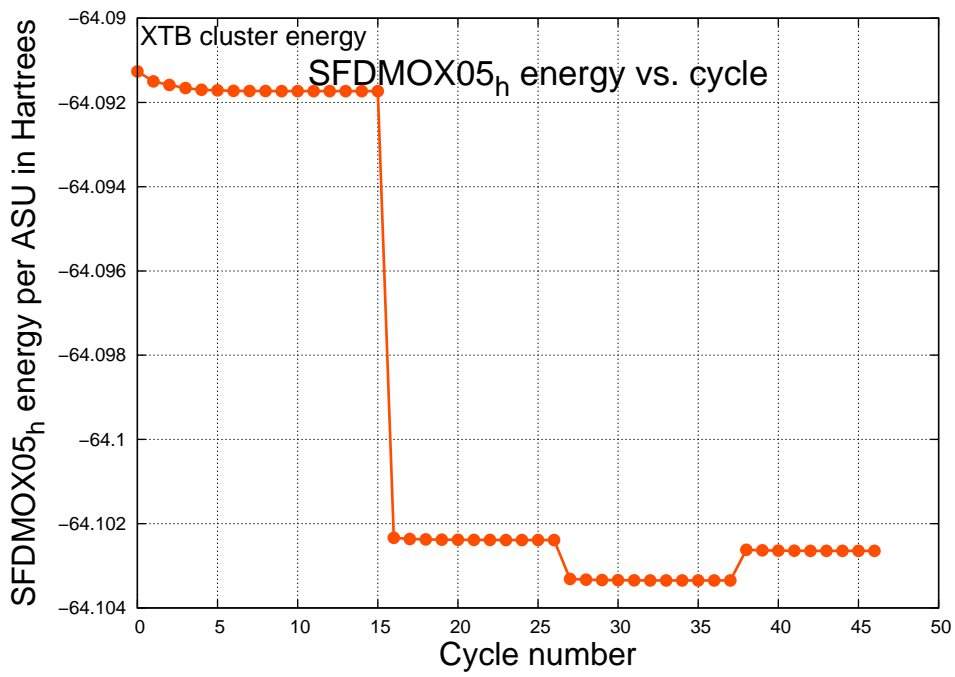



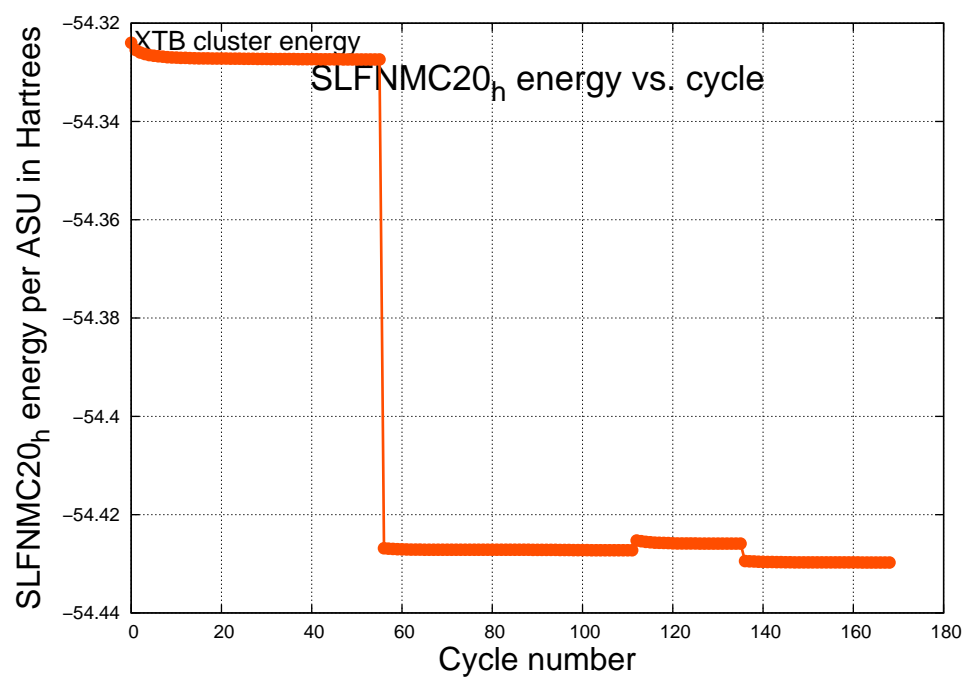

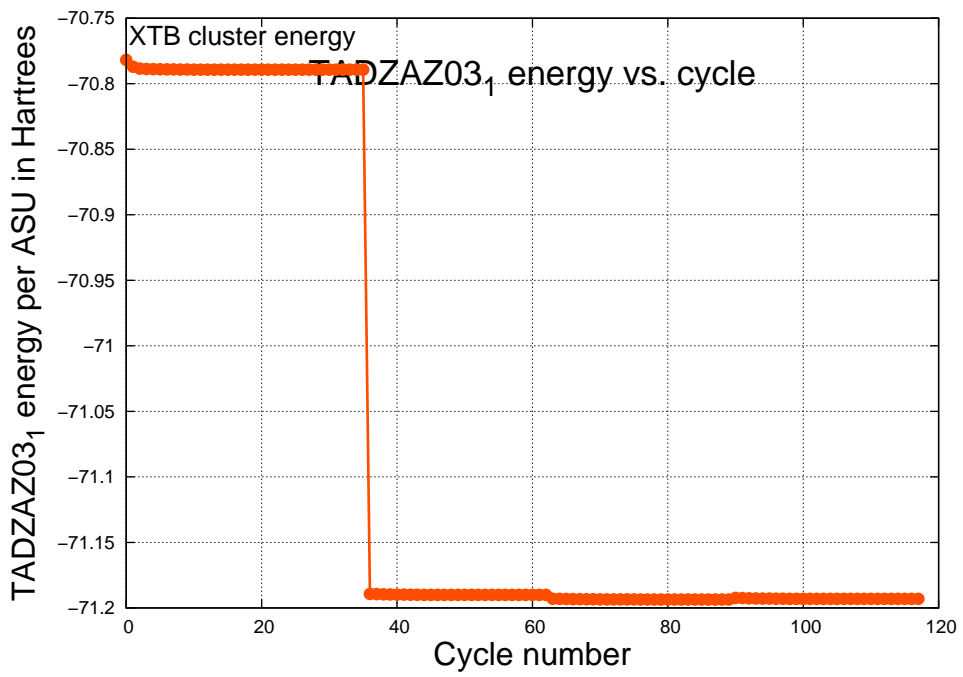

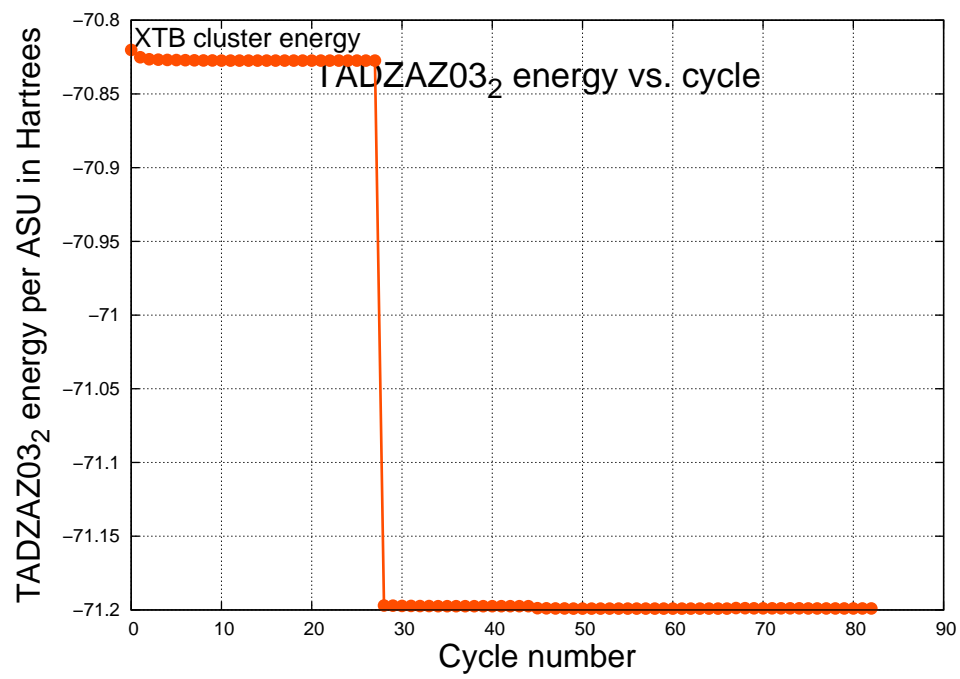

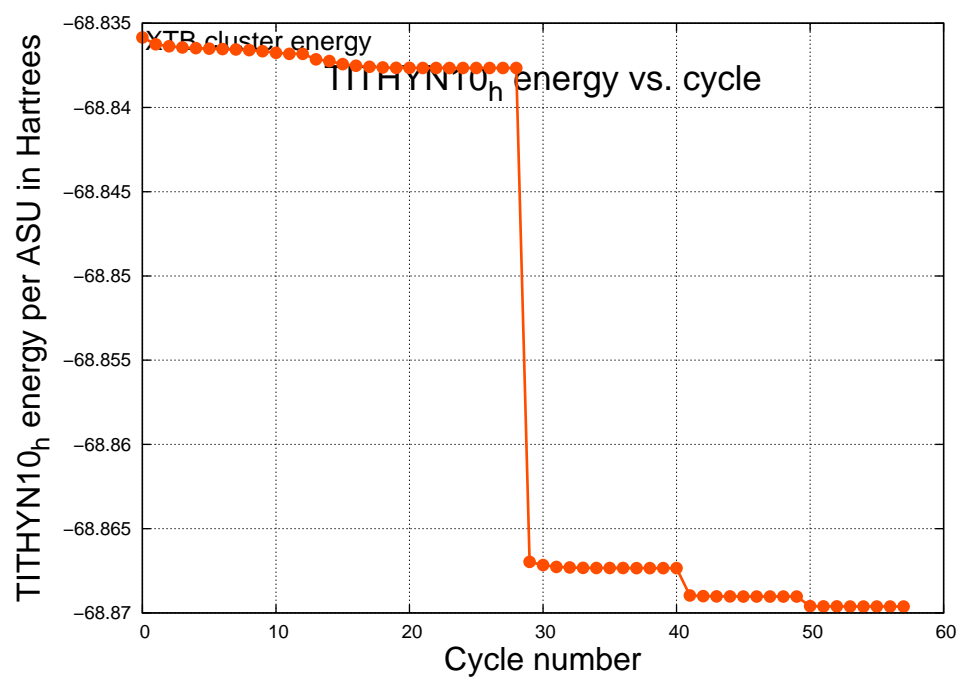

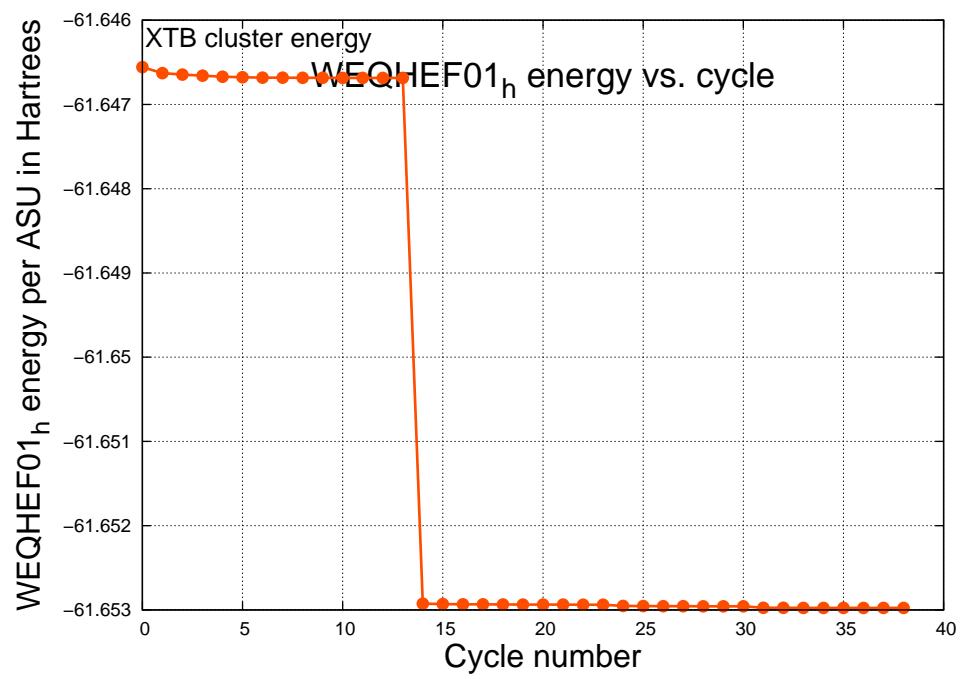

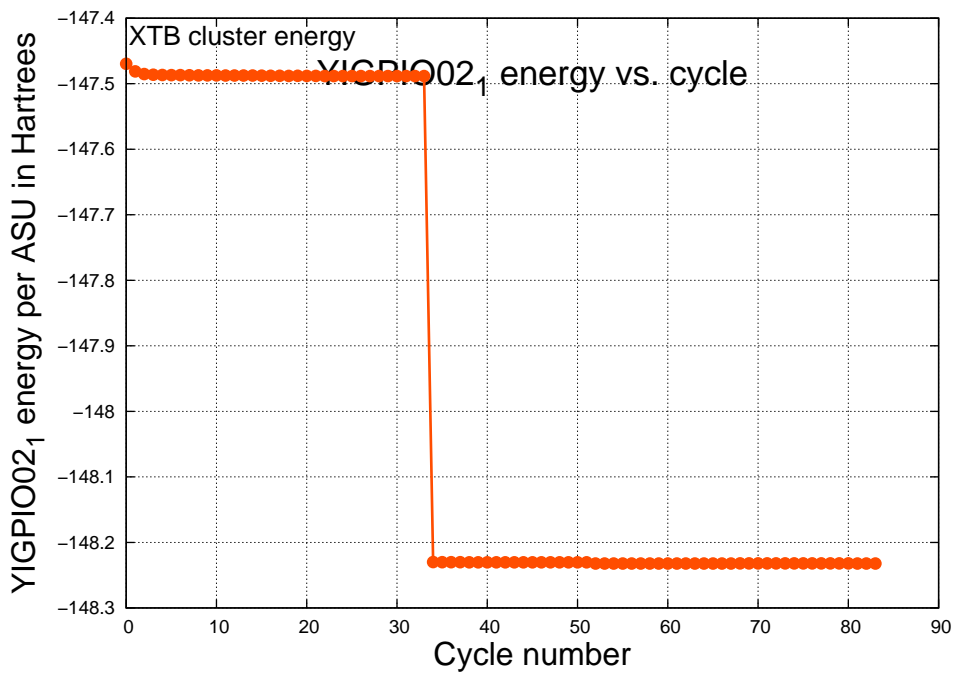

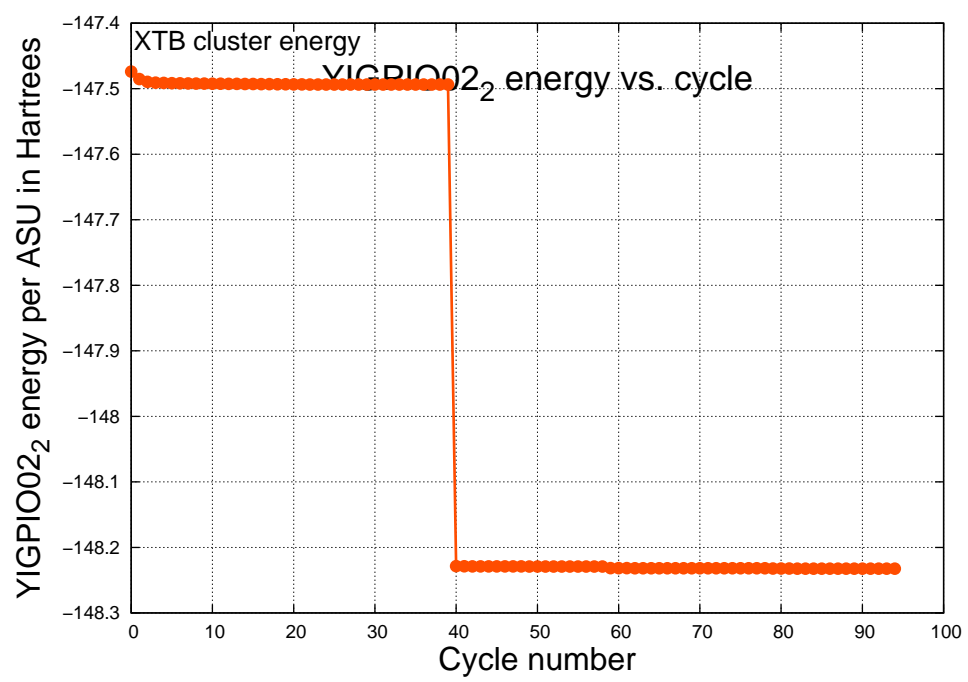

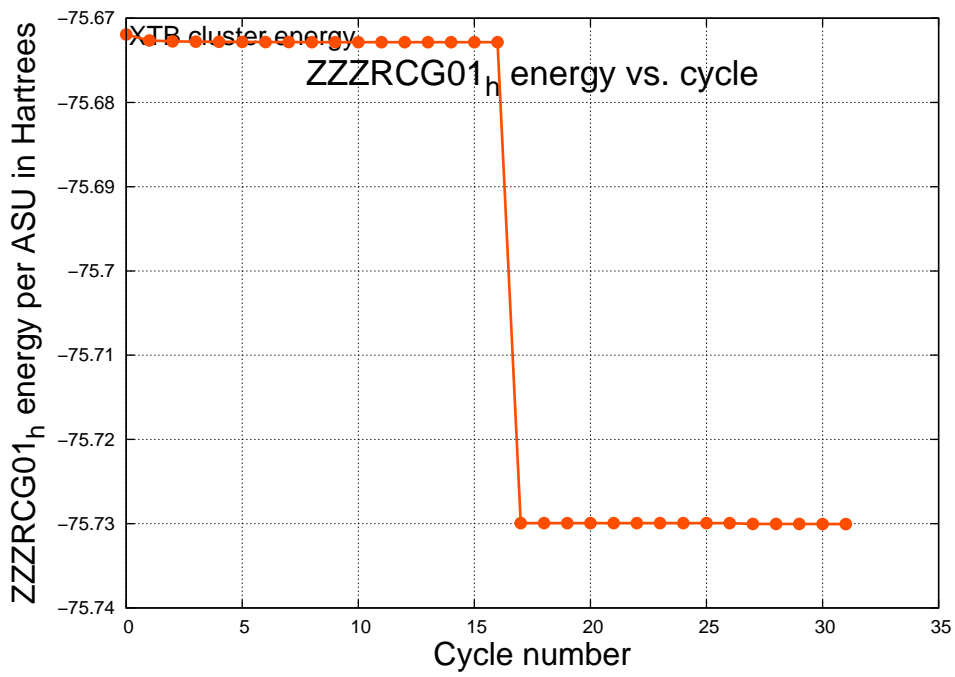

Supplement: d0ce00488j1.pdf [file d0ce00488j1.pdf]
